# Supplementary material
Source: HighWire-hosted journal article supplement (doi:10.1101/rna.079643.123)
Supplement: Supplemental_DataS1_Childetal_Proteomics.xlsx [file Supplemental_DataS1_Childetal_Proteomics.xlsx]

## Sheet: SILAC_Proteins
Protein FDR Confidence: Combined	Accession	Description	Coverage [%]	# PSMs	# Unique Peptides	Biological Process	Cellular Component	Molecular Function	Gene Symbol	Chromosome	KEGG Pathways	Reactome Pathways	Abundance Ratio: (Heavy) / (Light)	Abundance Ratio Variability [%]: (Heavy) / (Light)	Abundances (Grouped): Light	Abundances (Grouped): Heavy	Found in Sample: [S1] F1: Light, Control	Found in Sample: [S2] F1: Heavy, Sample	Modifications
High	P17066	Heat shock 70 kDa protein 6 OS=Homo sapiens OX=9606 GN=HSPA6 PE=1 SV=2	21	114	1	cell organization and biogenesis;metabolic process;response to stimulus;transport	cytoplasm;cytosol;extracellular;organelle lumen	catalytic activity;nucleotide binding;protein binding	HSPA6	1	Endocytosis; Longevity regulating pathway - multiple species; Epstein-Barr virus infection; Spliceosome; MAPK signaling pathway; Protein processing in endoplasmic reticulum; Toxoplasmosis; Measles; Influenza A; Estrogen signaling pathway; Legionellosis; Antigen processing and presentation	Neutrophil degranulation; Regulation of HSF1-mediated heat shock response	0.01		1138509		High	Not Found
High	P0CG38	POTE ankyrin domain family member I OS=Homo sapiens OX=9606 GN=POTEI PE=3 SV=1	9	270	1			protein binding	POTEI	2			0.01	0	215814743	1.26447e+06	High	Peak Found
High	Q4VXU2	Polyadenylate-binding protein 1-like OS=Homo sapiens OX=9606 GN=PABPC1L PE=2 SV=1	15	45	1	cell organization and biogenesis;metabolic process;regulation of biological process		RNA binding	PABPC1L	20	RNA degradation; mRNA surveillance pathway; RNA transport		0.01		1.93748e+06		High	Not Found
High	O60739	Eukaryotic translation initiation factor 1b OS=Homo sapiens OX=9606 GN=EIF1B PE=1 SV=2	53	8	1	metabolic process;regulation of biological process		protein binding;RNA binding	EIF1B	3	RNA transport		0.01		1.12233e+06		High	Not Found
High	Q66LE6	Serine/threonine-protein phosphatase 2A 55 kDa regulatory subunit B delta isoform OS=Homo sapiens OX=9606 GN=PPP2R2D PE=1 SV=1	17	16	1	cell division;metabolic process;regulation of biological process	cytoplasm;cytosol	catalytic activity;enzyme regulator activity;protein binding	PPP2R2D	10	Dopaminergic synapse; Chagas disease (American trypanosomiasis); Tight junction; Hippo signaling pathway; Adrenergic signaling in cardiomyocytes; AMPK signaling pathway; mRNA surveillance pathway; Sphingolipid signaling pathway; Hepatitis C; PI3K-Akt signaling pathway	MASTL Facilitates Mitotic Progression	0.01		868298		High	Not Found
High	A2RTX5	Threonine--tRNA ligase 2, cytoplasmic OS=Homo sapiens OX=9606 GN=TARSL2 PE=1 SV=1	8	16	1	metabolic process	cytoplasm	catalytic activity;nucleotide binding;protein binding	TARSL2	15	Aminoacyl-tRNA biosynthesis		0.01		4.4381e+06		High	Not Found
High	Q9NRW1	Ras-related protein Rab-6B OS=Homo sapiens OX=9606 GN=RAB6B PE=1 SV=1	32	12	1	regulation of biological process;response to stimulus;transport	cytosol;Golgi;membrane	catalytic activity;nucleotide binding;protein binding	RAB6B	3		COPI-independent Golgi-to-ER retrograde traffic; TBC/RABGAPs; Retrograde transport at the Trans-Golgi-Network; RAB GEFs exchange GTP for GDP on RABs; RAB geranylgeranylation	0.01		1.99974e+06		High	Not Found
High	Q9H0C2	ADP/ATP translocase 4 OS=Homo sapiens OX=9606 GN=SLC25A31 PE=2 SV=1	14	14	1	transport	membrane;mitochondrion;nucleus	transporter activity	SLC25A31	4	cGMP-PKG signaling pathway; Huntington's disease; HTLV-I infection; Parkinson's disease; Calcium signaling pathway		0.01		184357		High	Not Found
High	P51531	Probable global transcription activator SNF2L2 OS=Homo sapiens OX=9606 GN=SMARCA2 PE=1 SV=2	5	11	1	cell organization and biogenesis;metabolic process;regulation of biological process	cytoskeleton;nucleus	catalytic activity;DNA binding;nucleotide binding;protein binding	SMARCA2	9		RUNX1 interacts with co-factors whose precise effect on RUNX1 targets is not known; RMTs methylate histone arginines	0.01		170425		High	Not Found
High	P13747	HLA class I histocompatibility antigen, alpha chain E OS=Homo sapiens OX=9606 GN=HLA-E PE=1 SV=4	11	17	1								0.01		343024		High	Not Found
High	P04004	Vitronectin OS=Homo sapiens OX=9606 GN=VTN PE=1 SV=1	7	15	4	cell differentiation;cell organization and biogenesis;regulation of biological process;response to stimulus;transport	cytoplasm;endoplasmic reticulum;extracellular;organelle lumen	protein binding;receptor activity	VTN	17	Focal adhesion; Proteoglycans in cancer; Complement and coagulation cascades; ECM-receptor interaction; PI3K-Akt signaling pathway	ECM proteoglycans; Integrin cell surface interactions; Molecules associated with elastic fibres; Regulation of Complement cascade; Syndecan interactions	0.01	146.24	2.73818e+08	3.78483e+06	High	Peak Found
High	P19823	Inter-alpha-trypsin inhibitor heavy chain H2 OS=Homo sapiens OX=9606 GN=ITIH2 PE=1 SV=2	6	10	6	metabolic process;regulation of biological process	extracellular;organelle lumen	enzyme regulator activity	ITIH2	10		Post-translational protein phosphorylation; Regulation of Insulin-like Growth Factor (IGF) transport and uptake by Insulin-like Growth Factor Binding Proteins (IGFBPs)	0.01		4.58324e+07		High	Not Found
High	P52564	Dual specificity mitogen-activated protein kinase kinase 6 OS=Homo sapiens OX=9606 GN=MAP2K6 PE=1 SV=1	13	9	1	cell death;metabolic process;regulation of biological process;response to stimulus	cytoplasm;cytoskeleton;cytosol;nucleus	catalytic activity;nucleotide binding;protein binding	MAP2K6	17	TNF signaling pathway; Osteoclast differentiation; Epstein-Barr virus infection; Rap1 signaling pathway; MAPK signaling pathway; Toxoplasmosis; Toll-like receptor signaling pathway; Fc epsilon RI signaling pathway; Inflammatory mediator regulation of TRP channels; Amyotrophic lateral sclerosis (ALS); GnRH signaling pathway; Influenza A	PI5P Regulates TP53 Acetylation; NOD1/2 Signaling Pathway; Uptake and function of anthrax toxins; Activated TLR4 signalling; Interleukin-1 family signaling; CDO in myogenesis; activated TAK1 mediates p38 MAPK activation; Oxidative Stress Induced Senescence	0.01		2.2726e+06		High	Not Found
High	Q2VIQ3	Chromosome-associated kinesin KIF4B OS=Homo sapiens OX=9606 GN=KIF4B PE=2 SV=2	6	8	1	cell organization and biogenesis;cellular component movement;metabolic process;transport	cytoplasm;cytoskeleton;cytosol;nucleus	catalytic activity;DNA binding;metal ion binding;motor activity;nucleotide binding;protein binding;transporter activity	KIF4B	5		COPI-dependent Golgi-to-ER retrograde traffic; Kinesins; MHC class II antigen presentation; Recycling pathway of L1	0.01		318773		High	Not Found
High	Q9H3Q1	Cdc42 effector protein 4 OS=Homo sapiens OX=9606 GN=CDC42EP4 PE=1 SV=1	11	3	3	cell organization and biogenesis;regulation of biological process;response to stimulus	cytoplasm;cytoskeleton;membrane	enzyme regulator activity;protein binding;RNA binding	CDC42EP4	17			0.01		528305		High	Not Found
High	Q86XI2	Condensin-2 complex subunit G2 OS=Homo sapiens OX=9606 GN=NCAPG2 PE=1 SV=1	4	6	5	cell division;cell organization and biogenesis;cell proliferation;metabolic process	membrane;nucleus	protein binding	NCAPG2	7		Condensation of Prophase Chromosomes	0.01		4.06047e+06		High	Not Found
High	P05186	Alkaline phosphatase, tissue-nonspecific isozyme OS=Homo sapiens OX=9606 GN=ALPL PE=1 SV=4	10	4	3	cell differentiation;metabolic process;response to stimulus	extracellular;membrane	catalytic activity;metal ion binding;protein binding	ALPL	1	Folate biosynthesis; Thiamine metabolism; Metabolic pathways	Post-translational modification: synthesis of GPI-anchored proteins	0.01		2.85037e+06		High	Not Found
High	O76024	Wolframin OS=Homo sapiens OX=9606 GN=WFS1 PE=1 SV=2	7	4	4	cellular homeostasis;metabolic process;regulation of biological process;response to stimulus	endoplasmic reticulum;membrane;organelle lumen;proteasome	protein binding	WFS1	4	Protein processing in endoplasmic reticulum	Post-translational protein phosphorylation; Regulation of Insulin-like Growth Factor (IGF) transport and uptake by Insulin-like Growth Factor Binding Proteins (IGFBPs); XBP1(S) activates chaperone genes	0.01		2.91991e+06		High	Not Found
High	O94901	SUN domain-containing protein 1 OS=Homo sapiens OX=9606 GN=SUN1 PE=1 SV=3	6	4	2	cell differentiation;cell organization and biogenesis;cellular component movement;response to stimulus;transport	cytoplasm;membrane;nucleus	protein binding	SUN1	7		Meiotic synapsis	0.01		2.1867e+06		High	Not Found
High	Q06033	Inter-alpha-trypsin inhibitor heavy chain H3 OS=Homo sapiens OX=9606 GN=ITIH3 PE=1 SV=2	4	9	4	metabolic process;regulation of biological process;transport	extracellular;organelle lumen	enzyme regulator activity	ITIH3	3		Platelet degranulation	0.01		3.61575e+07		High	Not Found
High	P20742	Pregnancy zone protein OS=Homo sapiens OX=9606 GN=PZP PE=1 SV=4	2	8	1	regulation of biological process	extracellular	enzyme regulator activity	PZP	12			0.01		1466479		High	Not Found
High	O95677	Eyes absent homolog 4 OS=Homo sapiens OX=9606 GN=EYA4 PE=1 SV=2	5	4	3	cell differentiation;cell organization and biogenesis;development;metabolic process;regulation of biological process;response to stimulus	cytoplasm;nucleus	catalytic activity;metal ion binding;protein binding	EYA4	6		Recruitment and ATM-mediated phosphorylation of repair and signaling proteins at DNA double strand breaks	0.01		1.43809e+06		High	Not Found
High	Q9H4A5	Golgi phosphoprotein 3-like OS=Homo sapiens OX=9606 GN=GOLPH3L PE=1 SV=1	10	4	1	cell organization and biogenesis;regulation of biological process;transport	cytosol;Golgi;membrane	protein binding	GOLPH3L	1	Transcriptional misregulation in cancer		0.01		2086000		High	Not Found
High	Q676U5	Autophagy-related protein 16-1 OS=Homo sapiens OX=9606 GN=ATG16L1 PE=1 SV=2	7	3	3	cell communication;cell organization and biogenesis;metabolic process;response to stimulus;transport	cytoplasm;cytosol;membrane;vacuole	catalytic activity;protein binding	ATG16L1	2; CHR_HG2232_PATCH	NOD-like receptor signaling pathway; Autophagy	Macroautophagy	0.01		4.32432e+06		High	Not Found
High	Q9NS87	Kinesin-like protein KIF15 OS=Homo sapiens OX=9606 GN=KIF15 PE=1 SV=1	3	3	3	cell proliferation;cellular component movement;metabolic process;transport	cytoplasm;cytoskeleton;cytosol;membrane	catalytic activity;DNA binding;motor activity;nucleotide binding;protein binding;transporter activity	KIF15	3; CHR_HG2066_PATCH		COPI-dependent Golgi-to-ER retrograde traffic; Kinesins; MHC class II antigen presentation	0.01		1.57606e+06		High	Not Found
High	P13726	Tissue factor OS=Homo sapiens OX=9606 GN=F3 PE=1 SV=1	7	2	1	coagulation;metabolic process;regulation of biological process;response to stimulus	cell surface;extracellular;membrane	catalytic activity;protein binding;receptor activity;signal transducer activity	F3	1	AGE-RAGE signaling pathway in diabetic complications; Complement and coagulation cascades	Extrinsic Pathway of Fibrin Clot Formation	0.01		2.78137e+06		High	Not Found
High	Q9UPN4	Centrosomal protein of 131 kDa OS=Homo sapiens OX=9606 GN=CEP131 PE=1 SV=3	3	3	3	cell differentiation;cell organization and biogenesis;cellular component movement;development;metabolic process;regulation of biological process;transport	cytoplasm;cytoskeleton;cytosol	catalytic activity;motor activity;protein binding	AZI1; CEP131	17		Regulation of PLK1 Activity at G2/M Transition; AURKA Activation by TPX2; Anchoring of the basal body to the plasma membrane; Recruitment of NuMA to mitotic centrosomes; Loss of Nlp from mitotic centrosomes; Recruitment of mitotic centrosome proteins and complexes	0.01		1.05565e+06		High	Not Found
High	A0A0B4J295	BOLA2-SMG1P6 readthrough OS=Homo sapiens OX=9606 GN=BOLA2-SMG1P6 PE=3 SV=1	33	13	1				LOC101060252; BOLA2-SMG1P6	16			0.01		140778		High	Not Found
High	Q9BW19	Kinesin-like protein KIFC1 OS=Homo sapiens OX=9606 GN=KIFC1 PE=1 SV=2	7	3	3	cell division;cell organization and biogenesis;cellular component movement	cytoplasm;cytoskeleton;endosome;membrane;nucleus	catalytic activity;motor activity;nucleotide binding;protein binding	KIFC1	6; CHR_HSCHR6_MHC_QBL_CTG1; CHR_HSCHR6_MHC_SSTO_CTG1		COPI-dependent Golgi-to-ER retrograde traffic; Kinesins	0.01		2.11024e+06		High	Not Found
High	P54760	Ephrin type-B receptor 4 OS=Homo sapiens OX=9606 GN=EPHB4 PE=1 SV=2	4	4	1	cellular component movement;development;metabolic process;regulation of biological process;response to stimulus	cytosol;extracellular;membrane	catalytic activity;nucleotide binding;protein binding;receptor activity;signal transducer activity	EPHB4	7	Axon guidance	EPH-ephrin mediated repulsion of cells; Ephrin signaling; EPHB-mediated forward signaling	0.01		770835		High	Not Found
High	Q9UJ72	Annexin A10 OS=Homo sapiens OX=9606 GN=ANXA10 PE=1 SV=3	10	4	3		mitochondrion	metal ion binding;protein binding	ANXA10	4			0.01		4637444		High	Not Found
High	Q9UL26	Ras-related protein Rab-22A OS=Homo sapiens OX=9606 GN=RAB22A PE=1 SV=2	13	5	1	cell organization and biogenesis;regulation of biological process;response to stimulus;transport	cytoskeleton;endosome;membrane	catalytic activity;nucleotide binding;protein binding	RAB22A	20	Endocytosis	RAB geranylgeranylation	0.01		855507		High	Not Found
High	Q9BUE6	Iron-sulfur cluster assembly 1 homolog, mitochondrial OS=Homo sapiens OX=9606 GN=ISCA1 PE=1 SV=1	21	2	2	cell organization and biogenesis;metabolic process	mitochondrion;organelle lumen	metal ion binding;structural molecule activity	ISCA1	9		Mitochondrial iron-sulfur cluster biogenesis	0.01		1.51776e+06		High	Not Found
High	Q92871	Phosphomannomutase 1 OS=Homo sapiens OX=9606 GN=PMM1 PE=1 SV=2	13	7	2	metabolic process;transport	cytoplasm;cytosol	catalytic activity;metal ion binding;protein binding	PMM1	22	Fructose and mannose metabolism; Amino sugar and nucleotide sugar metabolism; Metabolic pathways	Synthesis of GDP-mannose	0.01		935153		High	Not Found
High	Q9UQ90	Paraplegin OS=Homo sapiens OX=9606 GN=SPG7 PE=1 SV=2	7	2	2	cell organization and biogenesis;cellular component movement;metabolic process;response to stimulus;transport	membrane;mitochondrion	catalytic activity;metal ion binding;nucleotide binding;protein binding	SPG7	16		Processing of SMDT1	0.01		930450		High	Not Found
High	Q15375	Ephrin type-A receptor 7 OS=Homo sapiens OX=9606 GN=EPHA7 PE=1 SV=3	4	6	2	cell death;cellular component movement;development;metabolic process;regulation of biological process;response to stimulus	membrane	catalytic activity;nucleotide binding;protein binding;receptor activity;signal transducer activity	EPHA7	6	Axon guidance	EPH-ephrin mediated repulsion of cells; EPHA-mediated growth cone collapse	0.01		1.13678e+06		High	Not Found
High	O43570	Carbonic anhydrase 12 OS=Homo sapiens OX=9606 GN=CA12 PE=1 SV=1	8	5	3	metabolic process;transport	membrane	catalytic activity;metal ion binding	CA12	15	Nitrogen metabolism	Reversible hydration of carbon dioxide	0.01		9.80571e+06		High	Not Found
High	Q14533	Keratin, type II cuticular Hb1 OS=Homo sapiens OX=9606 GN=KRT81 PE=1 SV=3	4	20	1	cell death;transport	cytosol	protein binding;structural molecule activity	KRT81	12		Formation of the cornified envelope	0.01		623239		High	Not Found
High	Q9C0D5	Protein TANC1 OS=Homo sapiens OX=9606 GN=TANC1 PE=1 SV=3	2	3	2	cell organization and biogenesis;response to stimulus	membrane	protein binding	TANC1	2			0.01		291120		High	Not Found
High	Q9BX79	Receptor for retinol uptake STRA6 OS=Homo sapiens OX=9606 GN=STRA6 PE=1 SV=1	3	2	2	metabolic process;regulation of biological process;response to stimulus;transport	membrane	receptor activity;transporter activity	STRA6	15		Signaling by GPCR; Retinoid cycle disease events; The canonical retinoid cycle in rods (twilight vision)	0.01		3.35261e+06		High	Not Found
High	Q8NEM2	SHC SH2 domain-binding protein 1 OS=Homo sapiens OX=9606 GN=SHCBP1 PE=1 SV=3	4	3	3	regulation of biological process;response to stimulus	cytoplasm;cytoskeleton	protein binding	SHCBP1	16			0.01		488907		High	Not Found
High	Q9BU61	NADH dehydrogenase [ubiquinone] 1 alpha subcomplex assembly factor 3 OS=Homo sapiens OX=9606 GN=NDUFAF3 PE=1 SV=1	26	3	3	cell organization and biogenesis	membrane;mitochondrion;nucleus	protein binding	NDUFAF3	3		Complex I biogenesis	0.01		3.78173e+07		High	Not Found
High	P62166	Neuronal calcium sensor 1 OS=Homo sapiens OX=9606 GN=NCS1 PE=1 SV=2	15	4	2	regulation of biological process;response to stimulus;transport	cytoplasm;cytosol;Golgi;membrane	metal ion binding;protein binding;transporter activity	NCS1	9			0.01		421594		High	Not Found
High	Q9UKX5	Integrin alpha-11 OS=Homo sapiens OX=9606 GN=ITGA11 PE=1 SV=2	2	2	2	cell differentiation;cell organization and biogenesis;cellular component movement;regulation of biological process;response to stimulus	membrane	metal ion binding;protein binding;receptor activity;signal transducer activity	ITGA11	15	Arrhythmogenic right ventricular cardiomyopathy (ARVC); Dilated cardiomyopathy; Focal adhesion; Regulation of actin cytoskeleton; ECM-receptor interaction; PI3K-Akt signaling pathway; Hypertrophic cardiomyopathy (HCM)	Integrin cell surface interactions	0.01		55987710		High	Not Found
High	Q8NHV4	Protein NEDD1 OS=Homo sapiens OX=9606 GN=NEDD1 PE=1 SV=1	5	2	2	cell division;regulation of biological process	cytoplasm;cytoskeleton;cytosol	protein binding	NEDD1	12		Regulation of PLK1 Activity at G2/M Transition; AURKA Activation by TPX2; Anchoring of the basal body to the plasma membrane; Recruitment of NuMA to mitotic centrosomes; Loss of Nlp from mitotic centrosomes; Recruitment of mitotic centrosome proteins and complexes	0.01		1.92617e+06		High	Not Found
High	O15061	Synemin OS=Homo sapiens OX=9606 GN=SYNM PE=1 SV=2	2	2	2	cell organization and biogenesis	cytoplasm;cytoskeleton;membrane	protein binding;structural molecule activity	SYNM	15			0.01		2.09657e+06		High	Not Found
High	Q9BZD4	Kinetochore protein Nuf2 OS=Homo sapiens OX=9606 GN=NUF2 PE=1 SV=2	5	2	2	cell division;cell organization and biogenesis	chromosome;cytosol;membrane;nucleus	protein binding	NUF2	1		Amplification of signal from unattached kinetochores via a MAD2 inhibitory signal; Separation of Sister Chromatids; Resolution of Sister Chromatid Cohesion; RHO GTPases Activate Formins	0.01		568531		High	Not Found
High	P02788	Lactotransferrin OS=Homo sapiens OX=9606 GN=LTF PE=1 SV=6	4	6	3	cellular homeostasis;defense response;metabolic process;regulation of biological process;response to stimulus;transport	cell surface;cytoplasm;extracellular;nucleus;organelle lumen	catalytic activity;DNA binding;enzyme regulator activity;metal ion binding;protein binding	LTF	3		Neutrophil degranulation; Mtb iron assimilation by chelation; Amyloid fiber formation; Metal sequestration by antimicrobial proteins	0.01		3.38891e+07		High	Not Found
High	P42695	Condensin-2 complex subunit D3 OS=Homo sapiens OX=9606 GN=NCAPD3 PE=1 SV=2	2	2	2	cell division;cell organization and biogenesis;metabolic process	membrane;nucleus	protein binding	NCAPD3	11		Condensation of Prophase Chromosomes	0.01		859818		High	Not Found
High	Q68CZ6	HAUS augmin-like complex subunit 3 OS=Homo sapiens OX=9606 GN=HAUS3 PE=1 SV=1	4	2	2	cell division;cell organization and biogenesis;regulation of biological process	cytoplasm;cytoskeleton;cytosol;mitochondrion	protein binding	HAUS3	4		Regulation of PLK1 Activity at G2/M Transition; AURKA Activation by TPX2; Anchoring of the basal body to the plasma membrane; Recruitment of NuMA to mitotic centrosomes; Loss of Nlp from mitotic centrosomes; Recruitment of mitotic centrosome proteins and complexes	0.01		1.15104e+06		High	Not Found
High	P54278	Mismatch repair endonuclease PMS2 OS=Homo sapiens OX=9606 GN=PMS2 PE=1 SV=2	3	2	2	metabolic process;response to stimulus	cytoskeleton;cytosol;membrane;nucleus	catalytic activity;DNA binding;nucleotide binding;protein binding	PMS2; LOC107984056	7	Fanconi anemia pathway; Mismatch repair	Mismatch repair (MMR) directed by MSH2:MSH3 (MutSbeta); Mismatch repair (MMR) directed by MSH2:MSH6 (MutSalpha); TP53 Regulates Transcription of DNA Repair Genes; Defective Mismatch Repair Associated With MLH1; Defective Mismatch Repair Associated With PMS2	0.01		1.54904e+06		High	Not Found
High	A0A075B767	Peptidyl-prolyl cis-trans isomerase A-like 4H OS=Homo sapiens OX=9606 GN=PPIAL4H PE=3 SV=1	29	38	1	metabolic process		catalytic activity	LOC101060723; LOC100996754; LOC105371242	1			0.01		672682		High	Not Found
High	P27540	Aryl hydrocarbon receptor nuclear translocator OS=Homo sapiens OX=9606 GN=ARNT PE=1 SV=1	4	3	3	cell differentiation;metabolic process;regulation of biological process;response to stimulus	cytoplasm;nucleus	DNA binding;protein binding;receptor activity;signal transducer activity	ARNT	1	HIF-1 signaling pathway; Pathways in cancer; Renal cell carcinoma; Chemical carcinogenesis	Aryl hydrocarbon receptor signalling; Endogenous sterols; Xenobiotics; Regulation of gene expression by Hypoxia-inducible Factor; PPARA activates gene expression	0.01		1.10522e+06		High	Not Found
High	Q9Y485	DmX-like protein 1 OS=Homo sapiens OX=9606 GN=DMXL1 PE=1 SV=3	1	2	2	cell organization and biogenesis;cellular homeostasis		protein binding	DMXL1	5			0.01		1.07601e+06		High	Not Found
High	Q96EK7	Constitutive coactivator of peroxisome proliferator-activated receptor gamma OS=Homo sapiens OX=9606 GN=FAM120B PE=1 SV=1	4	3	3	cell differentiation;metabolic process;regulation of biological process;response to stimulus	nucleus	protein binding	FAM120B	6; CHR_HSCHR6_1_CTG5		Transcriptional regulation of white adipocyte differentiation; PPARA activates gene expression	0.01		2345511		High	Not Found
High	Q9BRT2	Ubiquinol-cytochrome-c reductase complex assembly factor 2 OS=Homo sapiens OX=9606 GN=UQCC2 PE=1 SV=1	19	2	2	cell organization and biogenesis;regulation of biological process	membrane;mitochondrion;organelle lumen	protein binding	MNF1; UQCC2	6			0.01		1.0635e+06		High	Not Found
High	Q8WVB6	Chromosome transmission fidelity protein 18 homolog OS=Homo sapiens OX=9606 GN=CHTF18 PE=1 SV=1	3	3	2	metabolic process;regulation of biological process;response to stimulus	cytosol;membrane;nucleus	catalytic activity;DNA binding;nucleotide binding;protein binding	CHTF18	16			0.01		8.05228e+06		High	Not Found
High	Q8ND30	Liprin-beta-2 OS=Homo sapiens OX=9606 GN=PPFIBP2 PE=1 SV=3	4	4	1		cytosol	protein binding	PPFIBP2	11		Receptor-type tyrosine-protein phosphatases	0.01		1684001		High	Not Found
High	Q9H2I8	Leucine-rich melanocyte differentiation-associated protein OS=Homo sapiens OX=9606 GN=LRMDA PE=1 SV=1	18	2	2	cell differentiation		protein binding	C10orf11; LRMDA	10			0.01		699672		High	Not Found
High	Q13322	Growth factor receptor-bound protein 10 OS=Homo sapiens OX=9606 GN=GRB10 PE=1 SV=2	3	2	2	cellular component movement;regulation of biological process;response to stimulus	cytoplasm;cytosol;membrane	protein binding	GRB10	7	mTOR signaling pathway	RET signaling; Signaling by SCF-KIT; Signal attenuation; IRS activation	0.01		5.31987e+06		High	Not Found
High	O00712	Nuclear factor 1 B-type OS=Homo sapiens OX=9606 GN=NFIB PE=1 SV=2	5	2	1	cell differentiation;cell organization and biogenesis;cellular component movement;metabolic process;regulation of biological process	nucleus	DNA binding	NFIB	9		RNA Polymerase III Abortive And Retractive Initiation; RNA Polymerase III Transcription Termination	0.01		1.55629e+06		High	Not Found
High	Q8NDT2	Putative RNA-binding protein 15B OS=Homo sapiens OX=9606 GN=RBM15B PE=1 SV=3	2	3	1	metabolic process;regulation of biological process;transport	nucleus	protein binding;RNA binding	RBM15B	3			0.01		309901		High	Not Found
High	P30511	HLA class I histocompatibility antigen, alpha chain F OS=Homo sapiens OX=9606 GN=HLA-F PE=1 SV=3	9	5	2	regulation of biological process;response to stimulus	cell surface;endoplasmic reticulum;membrane	protein binding	HLA-F	6	Viral carcinogenesis; Endocytosis; Allograft rejection; Epstein-Barr virus infection; Type I diabetes mellitus; Cell adhesion molecules (CAMs); HTLV-I infection; Phagosome; Autoimmune thyroid disease; Herpes simplex infection; Viral myocarditis; Graft-versus-host disease; Antigen processing and presentation	Interferon alpha/beta signaling; ER-Phagosome pathway; Immunoregulatory interactions between a Lymphoid and a non-Lymphoid cell; Endosomal/Vacuolar pathway; Interferon gamma signaling; Antigen Presentation: Folding, assembly and peptide loading of class I MHC	0.01		402785		High	Not Found
High	P08581	Hepatocyte growth factor receptor OS=Homo sapiens OX=9606 GN=MET PE=1 SV=4	2	2	2	cell organization and biogenesis;cell proliferation;metabolic process;regulation of biological process;response to stimulus	cell surface;extracellular;membrane	catalytic activity;nucleotide binding;protein binding;receptor activity;signal transducer activity	MET	7	Endocytosis; Central carbon metabolism in cancer; MicroRNAs in cancer; Cytokine-cytokine receptor interaction; Rap1 signaling pathway; Pathways in cancer; Renal cell carcinoma; Melanoma; EGFR tyrosine kinase inhibitor resistance; Focal adhesion; Malaria; Proteoglycans in cancer; Transcriptional misregulation in cancer; Adherens junction; Bacterial invasion of epithelial cells; Ras signaling pathw…	MET Receptor Activation; MET activates PTK2 signaling; PI5P, PP2A and IER3 Regulate PI3K/AKT Signaling; MET activates RAP1 and RAC1; MET activates RAS signaling; MET receptor recycling; MET activates PTPN11; Negative regulation of MET activity; MET interacts with TNS proteins; Sema4D mediated inhibition of cell attachment and migration; MET activates STAT3; Constitutive Signaling by Aberrant PI3K…	0.01		1.48437e+06		High	Not Found
High	P04626	Receptor tyrosine-protein kinase erbB-2 OS=Homo sapiens OX=9606 GN=ERBB2 PE=1 SV=1	2	3	1	cell differentiation;cell organization and biogenesis;cell proliferation;cellular component movement;metabolic process;regulation of biological process;response to stimulus	cytoplasm;cytosol;membrane;nucleus	catalytic activity;nucleotide binding;protein binding;receptor activity;signal transducer activity	ERBB2	17	HIF-1 signaling pathway; Central carbon metabolism in cancer; Pancreatic cancer; MicroRNAs in cancer; Non-small cell lung cancer; Endometrial cancer; Breast cancer; ErbB signaling pathway; Pathways in cancer; Prostate cancer; EGFR tyrosine kinase inhibitor resistance; Focal adhesion; Proteoglycans in cancer; Adherens junction; Bladder cancer; Endocrine resistance; Calcium signaling pathway; Plati…	TFAP2 (AP-2) family regulates transcription of growth factors and their receptors; SHC1 events in ERBB2 signaling; PI5P, PP2A and IER3 Regulate PI3K/AKT Signaling; GRB7 events in ERBB2 signaling; Downregulation of ERBB2:ERBB3 signaling; ERBB2 Regulates Cell Motility; PLCG1 events in ERBB2 signaling; ERBB2 Activates PTK6 Signaling; Sema4D induced cell migration and growth-cone collapse; GRB2 event…	0.01		884466		High	Not Found
High	Q9BY67	Cell adhesion molecule 1 OS=Homo sapiens OX=9606 GN=CADM1 PE=1 SV=2	7	2	2	cell death;cell differentiation;cell organization and biogenesis;cell proliferation;development;regulation of biological process;response to stimulus	membrane	protein binding;receptor activity	CADM1	11	Cell adhesion molecules (CAMs)	Nectin/Necl trans heterodimerization	0.01		1.58738e+06		High	Not Found
High	Q5VV42	Threonylcarbamoyladenosine tRNA methylthiotransferase OS=Homo sapiens OX=9606 GN=CDKAL1 PE=1 SV=1	4	2	2	metabolic process	endoplasmic reticulum;membrane	catalytic activity;metal ion binding;protein binding	CDKAL1	6		tRNA modification in the nucleus and cytosol	0.01		753965		High	Not Found
High	Q9UNQ2	Probable dimethyladenosine transferase OS=Homo sapiens OX=9606 GN=DIMT1 PE=1 SV=1	8	3	2	metabolic process;regulation of biological process	cytosol;nucleus;organelle lumen	catalytic activity;RNA binding	DIMT1	5		rRNA modification in the nucleus and cytosol	0.01		1.68732e+06		High	Not Found
High	Q5TA45	Integrator complex subunit 11 OS=Homo sapiens OX=9606 GN=INTS11 PE=1 SV=2	4	2	2	metabolic process	cytoplasm;cytosol;nucleus	catalytic activity;protein binding	CPSF3L; INTS11	1		RNA polymerase II transcribes snRNA genes	0.01		2.8064e+06		High	Not Found
High	Q8TF64	PDZ domain-containing protein GIPC3 OS=Homo sapiens OX=9606 GN=GIPC3 PE=1 SV=1	7	1	1			protein binding	GIPC3	19			0.01		1.30045e+06		High	Not Found
High	A6NHQ2	rRNA/tRNA 2'-O-methyltransferase fibrillarin-like protein 1 OS=Homo sapiens OX=9606 GN=FBLL1 PE=3 SV=2	7	2	1	cell organization and biogenesis;metabolic process	nucleus	catalytic activity;RNA binding	FBLL1	5			0.01		1.03731e+06		High	Not Found
High	Q9Y496	Kinesin-like protein KIF3A OS=Homo sapiens OX=9606 GN=KIF3A PE=1 SV=4	3	2	1	cell differentiation;cell organization and biogenesis;cellular component movement;transport	cytoplasm;cytoskeleton;cytosol	catalytic activity;motor activity;nucleotide binding;protein binding	KIF3A	5	Hedgehog signaling pathway	Translocation of GLUT4 to the plasma membrane; COPI-dependent Golgi-to-ER retrograde traffic; Kinesins; Activation of SMO; Intraflagellar transport; MHC class II antigen presentation; Hedgehog 'off' state	0.01		3.97338e+06		High	Not Found
High	Q9UJC5	SH3 domain-binding glutamic acid-rich-like protein 2 OS=Homo sapiens OX=9606 GN=SH3BGRL2 PE=1 SV=2	13	2	1	cellular homeostasis;regulation of biological process	cytoplasm;membrane;nucleus	catalytic activity;protein binding	SH3BGRL2	6			0.01		1.04348e+06		High	Not Found
High	Q13546	Receptor-interacting serine/threonine-protein kinase 1 OS=Homo sapiens OX=9606 GN=RIPK1 PE=1 SV=3	4	2	2	cell death;cell organization and biogenesis;metabolic process;regulation of biological process;response to stimulus	cytoplasm;cytosol;membrane;mitochondrion	catalytic activity;nucleotide binding;protein binding;signal transducer activity	RIPK1	6	TNF signaling pathway; NOD-like receptor signaling pathway; Epstein-Barr virus infection; NF-kappa B signaling pathway; Apoptosis; Cytosolic DNA-sensing pathway; Toll-like receptor signaling pathway; Hepatitis C; RIG-I-like receptor signaling pathway	TLR3-mediated TICAM1-dependent programmed cell death; Ub-specific processing proteases; NF-kB activation through FADD/RIP-1 pathway mediated by caspase-8 and -10; TNFR1-induced proapoptotic signaling; IKK complex recruitment mediated by RIP1; TICAM1, RIP1-mediated IKK complex recruitment ; TRP channels; Ovarian tumor domain proteases; TNFR1-induced NFkappaB signaling pathway; RIP-mediated NFkB ac…	0.01		1171132		High	Not Found
High	Q2M296	Methenyltetrahydrofolate synthase domain-containing protein OS=Homo sapiens OX=9606 GN=MTHFSD PE=1 SV=2	8	3	2		cytoplasm	RNA binding	MTHFSD	16			0.01		496305		High	Not Found
High	Q68CQ4	Digestive organ expansion factor homolog OS=Homo sapiens OX=9606 GN=DIEXF PE=1 SV=2	3	2	2	development;metabolic process	nucleus	protein binding;RNA binding	DIEXF	1		Major pathway of rRNA processing in the nucleolus and cytosol; rRNA modification in the nucleus and cytosol	0.01		1233262		High	Not Found
High	Q9H165	B-cell lymphoma/leukemia 11A OS=Homo sapiens OX=9606 GN=BCL11A PE=1 SV=2	4	2	1	cell differentiation;metabolic process;regulation of biological process;response to stimulus	cytoplasm;nucleus	DNA binding;metal ion binding;protein binding	BCL11A	2			0.01		2306824		High	Not Found
High	Q93074	Mediator of RNA polymerase II transcription subunit 12 OS=Homo sapiens OX=9606 GN=MED12 PE=1 SV=4	1	2	2	metabolic process;regulation of biological process;response to stimulus	membrane;nucleus	catalytic activity;DNA binding;protein binding;receptor activity	MED12	X	Thyroid hormone signaling pathway	Transcriptional regulation of white adipocyte differentiation; PPARA activates gene expression; Generic Transcription Pathway	0.01		1.22551e+06		High	Not Found
High	Q8N108	Mesoderm induction early response protein 1 OS=Homo sapiens OX=9606 GN=MIER1 PE=1 SV=2	4	1	1	cell organization and biogenesis;metabolic process;regulation of biological process;response to stimulus	cytoplasm;nucleus	catalytic activity;DNA binding;protein binding;signal transducer activity	MIER1	1			0.01		1.22029e+06		High	Not Found
High	Q8IWV7	E3 ubiquitin-protein ligase UBR1 OS=Homo sapiens OX=9606 GN=UBR1 PE=1 SV=1	1	2	2	metabolic process;regulation of biological process;response to stimulus	cytoplasm;cytosol;proteasome	catalytic activity;metal ion binding;protein binding	UBR1	15		Antigen processing: Ubiquitination & Proteasome degradation	0.01		522756		High	Not Found
High	Q99595	Mitochondrial import inner membrane translocase subunit Tim17-A OS=Homo sapiens OX=9606 GN=TIMM17A PE=1 SV=1	13	1	1	transport	membrane;mitochondrion	transporter activity	TIMM17A	1		Mitochondrial protein import; Metabolism of proteins	0.01		1.49396e+06		High	Not Found
High	Q96KM6	Zinc finger protein 512B OS=Homo sapiens OX=9606 GN=ZNF512B PE=1 SV=1	2	2	2	metabolic process;regulation of biological process	nucleus	DNA binding;metal ion binding;protein binding	ZNF512B	20			0.01		2.6049e+06		High	Not Found
High	P00813	Adenosine deaminase OS=Homo sapiens OX=9606 GN=ADA PE=1 SV=3	8	1	1	cell differentiation;metabolic process;regulation of biological process;response to stimulus;transport	cell surface;cytoplasm;cytosol;membrane;organelle lumen;vacuole	catalytic activity;metal ion binding;protein binding	ADA	20	Primary immunodeficiency; Purine metabolism; Metabolic pathways	Purine salvage	0.01		627341		High	Not Found
High	P11532	Dystrophin OS=Homo sapiens OX=9606 GN=DMD PE=1 SV=3	1	5	1	cell organization and biogenesis;cellular component movement;cellular homeostasis;metabolic process;regulation of biological process;response to stimulus;transport	cell surface;cytoplasm;cytoskeleton;cytosol;membrane;nucleus	metal ion binding;protein binding;structural molecule activity	DMD	X	Arrhythmogenic right ventricular cardiomyopathy (ARVC); Dilated cardiomyopathy; Viral myocarditis; Hypertrophic cardiomyopathy (HCM)	Striated Muscle Contraction; Non-integrin membrane-ECM interactions	0.01		1.79651e+06		High	Not Found
High	P20338	Ras-related protein Rab-4A OS=Homo sapiens OX=9606 GN=RAB4A PE=1 SV=3	10	2	1	metabolic process;regulation of biological process;response to stimulus;transport	cytoplasm;cytosol;endosome;membrane	catalytic activity;enzyme regulator activity;nucleotide binding;protein binding;transporter activity	RAB4A	1	Endocytosis	Translocation of GLUT4 to the plasma membrane; MET receptor recycling; TBC/RABGAPs; Synthesis of PIPs at the plasma membrane; RAB geranylgeranylation	0.01		1.72123e+06		High	Not Found
High	P23610	Factor VIII intron 22 protein OS=Homo sapiens OX=9606 GN=F8A3 PE=1 SV=2	8	1	1		nucleus	protein binding	F8A2; F8A1; F8A3	X			0.01		143185		High	Not Found
High	Q9Y2I1	Nischarin OS=Homo sapiens OX=9606 GN=NISCH PE=1 SV=3	2	1	1	cell death;cell organization and biogenesis;metabolic process;regulation of biological process;response to stimulus;transport	cytoplasm;cytosol;endosome;membrane	protein binding	NISCH	3			0.01		171741		High	Not Found
High	Q9NW08	DNA-directed RNA polymerase III subunit RPC2 OS=Homo sapiens OX=9606 GN=POLR3B PE=1 SV=2	2	2	2	defense response;metabolic process;regulation of biological process;response to stimulus	cytosol;nucleus	catalytic activity;DNA binding;metal ion binding	POLR3B	12	Epstein-Barr virus infection; Purine metabolism; Cytosolic DNA-sensing pathway; RNA polymerase; Metabolic pathways; Pyrimidine metabolism	RNA Polymerase III Abortive And Retractive Initiation; RNA Polymerase III Transcription Termination; RNA Polymerase III Transcription Initiation From Type 1 Promoter; RNA Polymerase III Transcription Initiation From Type 3 Promoter; Cytosolic sensors of pathogen-associated DNA ; RNA Polymerase III Chain Elongation; RNA Polymerase III Transcription Initiation From Type 2 Promoter	0.01		4294939		High	Not Found
High	Q9Y448	Small kinetochore-associated protein OS=Homo sapiens OX=9606 GN=KNSTRN PE=1 SV=2	4	1	1	cell division;cell organization and biogenesis;regulation of biological process	chromosome;cytoplasm;cytoskeleton;cytosol;nucleus	protein binding	C15orf23; KNSTRN	15			0.01		1.15891e+06		High	Not Found
High	Q9BY31	Zinc finger protein 717 OS=Homo sapiens OX=9606 GN=ZNF717 PE=2 SV=2	2	2	1	metabolic process;regulation of biological process	nucleus	DNA binding;metal ion binding	ZNF717	3		Generic Transcription Pathway	0.01		1.27418e+06		High	Not Found
High	O96017	Serine/threonine-protein kinase Chk2 OS=Homo sapiens OX=9606 GN=CHEK2 PE=1 SV=1	2	1	1	cell death;cell division;cell organization and biogenesis;metabolic process;regulation of biological process;response to stimulus	Golgi;nucleus	catalytic activity;metal ion binding;nucleotide binding;protein binding	CHEK2	22	HTLV-I infection; p53 signaling pathway; Cell cycle	Chk1/Chk2(Cds1) mediated inactivation of Cyclin B:Cdk1 complex; Ubiquitin Mediated Degradation of Phosphorylated Cdc25A; Stabilization of p53; Regulation of TP53 Degradation; Recruitment and ATM-mediated phosphorylation of repair and signaling proteins at DNA double strand breaks; Regulation of TP53 Activity through Methylation; Regulation of TP53 Activity through Phosphorylation	0.01		931878		High	Not Found
High	Q9H410	Kinetochore-associated protein DSN1 homolog OS=Homo sapiens OX=9606 GN=DSN1 PE=1 SV=2	5	1	1	cell division;cell organization and biogenesis;transport	chromosome;cytosol;extracellular;nucleus;organelle lumen	protein binding	DSN1	20		Amplification of signal from unattached kinetochores via a MAD2 inhibitory signal; Neutrophil degranulation; Separation of Sister Chromatids; Resolution of Sister Chromatid Cohesion; RHO GTPases Activate Formins	0.01		412576		High	Not Found
High	Q5T749	Keratinocyte proline-rich protein OS=Homo sapiens OX=9606 GN=KPRP PE=1 SV=1	3	2	2		cytoplasm	protein binding	KPRP	1			0.01		4.48113e+06		High	Not Found
High	Q86Y39	NADH dehydrogenase [ubiquinone] 1 alpha subcomplex subunit 11 OS=Homo sapiens OX=9606 GN=NDUFA11 PE=1 SV=3	16	1	1	cell organization and biogenesis;metabolic process;transport	membrane;mitochondrion	catalytic activity	NDUFA11	19	Huntington's disease; Parkinson's disease; Alzheimer's disease; Oxidative phosphorylation; Non-alcoholic fatty liver disease (NAFLD); Metabolic pathways	Complex I biogenesis	0.01		2.50985e+06		High	Not Found
High	P49761	Dual specificity protein kinase CLK3 OS=Homo sapiens OX=9606 GN=CLK3 PE=1 SV=3	3	2	1	metabolic process;regulation of biological process	cytoplasm;cytoskeleton;membrane;nucleus	catalytic activity;nucleotide binding;protein binding;RNA binding	CLK3	15			0.01		543589		High	Not Found
High	Q9H944	Mediator of RNA polymerase II transcription subunit 20 OS=Homo sapiens OX=9606 GN=MED20 PE=1 SV=1	9	1	1	cell differentiation;metabolic process;regulation of biological process	nucleus	catalytic activity;protein binding	MED20	6		Transcriptional regulation of white adipocyte differentiation; PPARA activates gene expression; Generic Transcription Pathway	0.01		515243		High	Not Found
High	P09913	Interferon-induced protein with tetratricopeptide repeats 2 OS=Homo sapiens OX=9606 GN=IFIT2 PE=1 SV=1	4	2	1	cell death;cell organization and biogenesis;defense response;regulation of biological process;response to stimulus	cytoplasm;cytosol;endoplasmic reticulum	protein binding;RNA binding	IFIT2	10		Interferon alpha/beta signaling	0.01		275635		High	Not Found
High	Q9Y6Y0	Influenza virus NS1A-binding protein OS=Homo sapiens OX=9606 GN=IVNS1ABP PE=1 SV=3	2	1	1	metabolic process;regulation of biological process;response to stimulus	cytoplasm;cytoskeleton;cytosol;nucleus;spliceosomal complex	protein binding	IVNS1ABP	1	Influenza A		0.01		867646		High	Not Found
High	Q6PL18	ATPase family AAA domain-containing protein 2 OS=Homo sapiens OX=9606 GN=ATAD2 PE=1 SV=1	1	1	1	cell organization and biogenesis;metabolic process;regulation of biological process	nucleus	catalytic activity;nucleotide binding;protein binding	ATAD2	8		TFAP2 (AP-2) family regulates transcription of growth factors and their receptors	0.01		619684		High	Not Found
High	Q8N8A6	ATP-dependent RNA helicase DDX51 OS=Homo sapiens OX=9606 GN=DDX51 PE=1 SV=3	3	1	1	metabolic process	cytoplasm;membrane;nucleus	catalytic activity;DNA binding;nucleotide binding;protein binding;RNA binding	DDX51	12			0.01		728526		High	Not Found
High	Q765P7	Protein MTSS 2 OS=Homo sapiens OX=9606 GN=MTSS2 PE=1 SV=1	2	1	1	cell organization and biogenesis;regulation of biological process;response to stimulus	cytoplasm;cytoskeleton;membrane	enzyme regulator activity;protein binding	MTSS1L	16			0.01		478213		High	Not Found
High	Q53EU6	Glycerol-3-phosphate acyltransferase 3 OS=Homo sapiens OX=9606 GN=GPAT3 PE=1 SV=2	5	1	1	metabolic process;regulation of biological process	endoplasmic reticulum;membrane	catalytic activity	AGPAT9; GPAT3	4	Glycerolipid metabolism; Glycerophospholipid metabolism; Metabolic pathways	Synthesis of PA	0.01		469804		High	Not Found
High	P33981	Dual specificity protein kinase TTK OS=Homo sapiens OX=9606 GN=TTK PE=1 SV=2	4	2	2	cell organization and biogenesis;metabolic process;regulation of biological process	chromosome;cytoplasm;membrane	catalytic activity;nucleotide binding;protein binding	TTK	6	Cell cycle		0.01		2.26891e+06		High	Not Found
High	O43251	RNA binding protein fox-1 homolog 2 OS=Homo sapiens OX=9606 GN=RBFOX2 PE=1 SV=3	7	1	1	cell organization and biogenesis;cellular component movement;metabolic process;regulation of biological process;response to stimulus	cytoplasm;cytosol;nucleus	protein binding;RNA binding	RBFOX2	22		FGFR2 alternative splicing	0.01		237916		High	Not Found
High	Q13309	S-phase kinase-associated protein 2 OS=Homo sapiens OX=9606 GN=SKP2 PE=1 SV=2	4	1	1	cell communication;cell proliferation;metabolic process;regulation of biological process;response to stimulus	cytoplasm;cytosol;nucleus	catalytic activity;protein binding	SKP2	5	Viral carcinogenesis; FoxO signaling pathway; Ubiquitin mediated proteolysis; Epstein-Barr virus infection; Pathways in cancer; mTOR signaling pathway; Small cell lung cancer; Herpes simplex infection; Cell cycle	Regulation of RUNX2 expression and activity; Ub-specific processing proteases; Cyclin D associated events in G1; APC/C:Cdh1 mediated degradation of Cdc20 and other APC/C:Cdh1 targeted proteins in late mitosis/early G1; Antigen processing: Ubiquitination & Proteasome degradation; Neddylation; SCF(Skp2)-mediated degradation of p27/p21	0.01		847820		High	Not Found
High	Q86UX6	Serine/threonine-protein kinase 32C OS=Homo sapiens OX=9606 GN=STK32C PE=1 SV=1	2	1	1	metabolic process;regulation of biological process;response to stimulus		catalytic activity;metal ion binding;nucleotide binding	STK32C	10			0.01		561378		High	Not Found
High	Q9UHB4	NADPH-dependent diflavin oxidoreductase 1 OS=Homo sapiens OX=9606 GN=NDOR1 PE=1 SV=1	3	1	1	cell death;metabolic process;response to stimulus	cytoplasm;cytoskeleton;cytosol;nucleus	catalytic activity;nucleotide binding;protein binding	NDOR1	9		Cytosolic iron-sulfur cluster assembly	0.01		188122		High	Not Found
High	Q9NYT0	Pleckstrin-2 OS=Homo sapiens OX=9606 GN=PLEK2 PE=1 SV=1	7	1	1	cell organization and biogenesis;regulation of biological process;response to stimulus	cytoplasm;cytoskeleton;membrane		PLEK2	14			0.01		92423.1		High	Not Found
High	Q96NU0	Contactin-associated protein-like 3B OS=Homo sapiens OX=9606 GN=CNTNAP3B PE=2 SV=3	1	1	1								0.01		309425		High	Not Found
High	Q8N2M8	CLK4-associating serine/arginine rich protein OS=Homo sapiens OX=9606 GN=CLASRP PE=1 SV=4	2	1	1	metabolic process	nucleus	protein binding	CLASRP	19			0.01		705607		High	Not Found
High	P01034	Cystatin-C OS=Homo sapiens OX=9606 GN=CST3 PE=1 SV=1	12	1	1	cell death;cell organization and biogenesis;defense response;metabolic process;regulation of biological process;response to stimulus;transport	cytoplasm;endoplasmic reticulum;endosome;extracellular;membrane;organelle lumen;vacuole	enzyme regulator activity;protein binding	CST3	20	Salivary secretion	Post-translational protein phosphorylation; Regulation of Insulin-like Growth Factor (IGF) transport and uptake by Insulin-like Growth Factor Binding Proteins (IGFBPs); Neutrophil degranulation; Amyloid fiber formation	0.01		793027		High	Not Found
High	Q96KQ7	Histone-lysine N-methyltransferase EHMT2 OS=Homo sapiens OX=9606 GN=EHMT2 PE=1 SV=3	1	2	2	cell communication;cell organization and biogenesis;metabolic process;regulation of biological process;response to stimulus	chromosome;nucleus	catalytic activity;metal ion binding;protein binding	EHMT2	6; CHR_HSCHR6_MHC_DBB_CTG1; CHR_HSCHR6_MHC_COX_CTG1; CHR_HSCHR6_MHC_QBL_CTG1	Lysine degradation; Longevity regulating pathway	ERCC6 (CSB) and EHMT2 (G9a) positively regulate rRNA expression; Transcriptional Regulation by E2F6; PKMTs methylate histone lysines; Regulation of TP53 Activity through Methylation; Senescence-Associated Secretory Phenotype (SASP); RNA Polymerase I Transcription Initiation	0.01		1.03652e+06		High	Not Found
High	Q8N129	Protein canopy homolog 4 OS=Homo sapiens OX=9606 GN=CNPY4 PE=2 SV=1	6	1	1	regulation of biological process	extracellular	protein binding	CNPY4	7			0.01		1.36181e+06		High	Not Found
High	Q6UWN8	Serine protease inhibitor Kazal-type 6 OS=Homo sapiens OX=9606 GN=SPINK6 PE=1 SV=1	20	1	1	cell death;regulation of biological process	extracellular	enzyme regulator activity;protein binding	SPINK6	5		Formation of the cornified envelope	0.01		364244		High	Not Found
High	Q14353	Guanidinoacetate N-methyltransferase OS=Homo sapiens OX=9606 GN=GAMT PE=1 SV=1	9	1	1	metabolic process;regulation of biological process	cytoplasm;cytosol;nucleus	catalytic activity	GAMT	19	Glycine, serine and threonine metabolism; Metabolic pathways; Arginine and proline metabolism	Creatine metabolism	0.01		760972		High	Not Found
High	Q12830	Nucleosome-remodeling factor subunit BPTF OS=Homo sapiens OX=9606 GN=BPTF PE=1 SV=3	0	1	1	cell organization and biogenesis;metabolic process;regulation of biological process;response to stimulus	cytoplasm;nucleus	catalytic activity;DNA binding;metal ion binding;protein binding	BPTF	17			0.01		931306		High	Not Found
High	Q8TE02	Elongator complex protein 5 OS=Homo sapiens OX=9606 GN=ELP5 PE=1 SV=2	5	1	1	metabolic process;regulation of biological process	cytoplasm;cytosol;nucleus	protein binding	ELP5	17		HATs acetylate histones	0.01		1.01726e+06		High	Not Found
High	O43824	Putative GTP-binding protein 6 OS=Homo sapiens OX=9606 GN=GTPBP6 PE=2 SV=4	2	1	1								0.01		882443		High	Not Found
High	P17036	Zinc finger protein 3 OS=Homo sapiens OX=9606 GN=ZNF3 PE=1 SV=3	3	1	1	cell differentiation;development;metabolic process;regulation of biological process	nucleus	DNA binding;metal ion binding;protein binding	ZNF3	7		Generic Transcription Pathway	0.01		1.69988e+06		High	Not Found
High	P50607	Tubby protein homolog OS=Homo sapiens OX=9606 GN=TUB PE=1 SV=1	3	1	1	cell organization and biogenesis;regulation of biological process;response to stimulus;transport	cytoplasm;cytosol;extracellular;membrane;nucleus	protein binding	TUB	11			0.01		252326		High	Not Found
High	P05423	DNA-directed RNA polymerase III subunit RPC4 OS=Homo sapiens OX=9606 GN=POLR3D PE=1 SV=2	5	2	1	defense response;metabolic process;regulation of biological process;response to stimulus	cytosol;nucleus	catalytic activity;DNA binding	POLR3D	8	Epstein-Barr virus infection; Purine metabolism; Cytosolic DNA-sensing pathway; RNA polymerase; Metabolic pathways; Pyrimidine metabolism	RNA Polymerase III Abortive And Retractive Initiation; RNA Polymerase III Transcription Termination; RNA Polymerase III Transcription Initiation From Type 1 Promoter; RNA Polymerase III Transcription Initiation From Type 3 Promoter; Cytosolic sensors of pathogen-associated DNA ; RNA Polymerase III Chain Elongation; RNA Polymerase III Transcription Initiation From Type 2 Promoter	0.01		3.3539e+06		High	Not Found
High	Q2VPK5	Cytoplasmic tRNA 2-thiolation protein 2 OS=Homo sapiens OX=9606 GN=CTU2 PE=1 SV=1	2	1	1	metabolic process	cytoplasm;cytosol	catalytic activity;protein binding;RNA binding	CTU2	16	Sulfur relay system	tRNA modification in the nucleus and cytosol	0.01		406623		High	Not Found
High	Q9H6T0	Epithelial splicing regulatory protein 2 OS=Homo sapiens OX=9606 GN=ESRP2 PE=1 SV=1	4	1	1	metabolic process;regulation of biological process;response to stimulus	nucleus	RNA binding	ESRP2	16		FGFR2 alternative splicing	0.01		151718		High	Not Found
High	P61244	Protein max OS=Homo sapiens OX=9606 GN=MAX PE=1 SV=1	6	1	1	cell communication;cell death;cell organization and biogenesis;metabolic process;regulation of biological process;response to stimulus	cytoplasm;nucleus	DNA binding;protein binding	MAX	14	MAPK signaling pathway; Pathways in cancer; Transcriptional misregulation in cancer; Small cell lung cancer	Cyclin E associated events during G1/S transition ; Transcription of E2F targets under negative control by DREAM complex; Cyclin A:Cdk2-associated events at S phase entry; Transcriptional Regulation by E2F6	0.01		1.03756e+06		High	Not Found
High	Q9NP80	Calcium-independent phospholipase A2-gamma OS=Homo sapiens OX=9606 GN=PNPLA8 PE=1 SV=1	2	2	1	cell death;metabolic process;transport	cytoplasm;endoplasmic reticulum;Golgi;membrane	catalytic activity;nucleotide binding	PNPLA8	7		Acyl chain remodelling of PE; Acyl chain remodelling of PC	0.01		90193.7		High	Not Found
High	Q92844	TRAF family member-associated NF-kappa-B activator OS=Homo sapiens OX=9606 GN=TANK PE=1 SV=2	3	1	1	metabolic process;regulation of biological process;response to stimulus	cytoplasm;cytosol	catalytic activity;enzyme regulator activity;metal ion binding;protein binding	TANK	2	NOD-like receptor signaling pathway; RIG-I-like receptor signaling pathway	TICAM1-dependent activation of IRF3/IRF7; Activation of IRF3/IRF7 mediated by TBK1/IKK epsilon; TRAF6 mediated IRF7 activation; Activated TLR4 signalling	0.01		919172		High	Not Found
High	P32321	Deoxycytidylate deaminase OS=Homo sapiens OX=9606 GN=DCTD PE=1 SV=2	7	1	1	metabolic process	cytoplasm;cytosol	catalytic activity;metal ion binding;protein binding	DCTD	4	Metabolic pathways; Pyrimidine metabolism	Interconversion of nucleotide di- and triphosphates	0.01		1.37354e+06		High	Not Found
High	Q96GX2	Ataxin-7-like protein 3B OS=Homo sapiens OX=9606 GN=ATXN7L3B PE=1 SV=2	21	1	1		cytoplasm		ATXN7L3B	12			0.01		516664		High	Not Found
High	Q14185	Dedicator of cytokinesis protein 1 OS=Homo sapiens OX=9606 GN=DOCK1 PE=1 SV=2	1	2	1	cell death;cell organization and biogenesis;cellular component movement;coagulation;regulation of biological process;response to stimulus;transport	cytoplasm;cytosol;membrane	enzyme regulator activity;protein binding	DOCK1	10	Focal adhesion; Regulation of actin cytoskeleton; Bacterial invasion of epithelial cells; Shigellosis	DCC mediated attractive signaling; Regulation of actin dynamics for phagocytic cup formation; PTK6 Regulates RHO GTPases, RAS GTPase and MAP kinases; VEGFA-VEGFR2 Pathway; Factors involved in megakaryocyte development and platelet production	0.01		1.35328e+06		High	Not Found
High	Q9NPH2	Inositol-3-phosphate synthase 1 OS=Homo sapiens OX=9606 GN=ISYNA1 PE=1 SV=1	2	1	1	metabolic process	cytoplasm;cytosol	catalytic activity;protein binding	ISYNA1	19	Inositol phosphate metabolism; Metabolic pathways	Synthesis of IP2, IP, and Ins in the cytosol	0.01		522913		High	Not Found
High	Q9BV81	ER membrane protein complex subunit 6 OS=Homo sapiens OX=9606 GN=EMC6 PE=1 SV=1	9	1	1	cell organization and biogenesis;metabolic process	endoplasmic reticulum;membrane	protein binding	EMC6	17			0.01		2.92912e+06		High	Not Found
High	Q6UX07	Dehydrogenase/reductase SDR family member 13 OS=Homo sapiens OX=9606 GN=DHRS13 PE=2 SV=1	6	1	1	metabolic process	extracellular;membrane	catalytic activity	DHRS13	17			0.01		423226		High	Not Found
High	Q6IBW4	Condensin-2 complex subunit H2 OS=Homo sapiens OX=9606 GN=NCAPH2 PE=1 SV=1	2	1	1	cell organization and biogenesis;metabolic process	chromosome;membrane;nucleus	protein binding	NCAPH2	22		Condensation of Prophase Chromosomes	0.01		3.76558e+06		High	Not Found
High	O95263	High affinity cAMP-specific and IBMX-insensitive 3',5'-cyclic phosphodiesterase 8B OS=Homo sapiens OX=9606 GN=PDE8B PE=1 SV=2	2	1	1	metabolic process;regulation of biological process;response to stimulus	cytosol	catalytic activity;metal ion binding;protein binding	PDE8B	5	Purine metabolism; Morphine addiction	G alpha (s) signalling events	0.01		138459		High	Not Found
High	Q8NHU6	Tudor domain-containing protein 7 OS=Homo sapiens OX=9606 GN=TDRD7 PE=1 SV=2	1	1	1	cell differentiation;regulation of biological process	cytoplasm;organelle lumen	protein binding;RNA binding	TDRD7	9			0.01		366217		High	Not Found
High	P31431	Syndecan-4 OS=Homo sapiens OX=9606 GN=SDC4 PE=1 SV=2	5	1	1	cell organization and biogenesis;cellular component movement;metabolic process;regulation of biological process;response to stimulus	cell surface;extracellular;membrane;organelle lumen	protein binding;receptor activity;signal transducer activity	SDC4	20	Cell adhesion molecules (CAMs); Proteoglycans in cancer; ECM-receptor interaction	Defective B4GALT7 causes EDS, progeroid type; Retinoid metabolism and transport; Defective EXT2 causes exostoses 2; Syndecan interactions; Defective EXT1 causes exostoses 1, TRPS2 and CHDS; Signaling by GPCR; HS-GAG biosynthesis; A tetrasaccharide linker sequence is required for GAG synthesis; Cell surface interactions at the vascular wall; Defective B3GALT6 causes EDSP2 and SEMDJL1; HS-GAG degra…	0.01		6201376		High	Not Found
High	O15047	Histone-lysine N-methyltransferase SETD1A OS=Homo sapiens OX=9606 GN=SETD1A PE=1 SV=3	1	1	1	cell organization and biogenesis;metabolic process;regulation of biological process	chromosome;nucleus	catalytic activity;protein binding;RNA binding	SETD1A	16	Lysine degradation	PKMTs methylate histone lysines; RUNX1 regulates genes involved in megakaryocyte differentiation and platelet function	0.01		650727		High	Not Found
High	Q12899	Tripartite motif-containing protein 26 OS=Homo sapiens OX=9606 GN=TRIM26 PE=1 SV=1	2	1	1	defense response;regulation of biological process;response to stimulus	cytoplasm;cytosol;nucleus	catalytic activity;DNA binding;metal ion binding;protein binding	TRIM26	6; CHR_HSCHR6_MHC_COX_CTG1; CHR_HSCHR6_MHC_MANN_CTG1; CHR_HSCHR6_MHC_APD_CTG1; CHR_HSCHR6_MHC_QBL_CTG1; CHR_HSCHR6_MHC_MCF_CTG1; CHR_HSCHR6_MHC_DBB_CTG1; CHR_HSCHR6_MHC_SSTO_CTG1		Interferon gamma signaling	0.01		1.33458e+06		High	Not Found
High	Q587I9	Vesicle transport protein SFT2C OS=Homo sapiens OX=9606 GN=SFT2D3 PE=2 SV=1	5	1	1	transport	membrane		SFT2D3	2			0.01		1.05988e+06		High	Not Found
High	P09455	Retinol-binding protein 1 OS=Homo sapiens OX=9606 GN=RBP1 PE=1 SV=2	14	2	2	metabolic process;transport	cytoplasm;cytosol	transporter activity	RBP1	3		Signaling by GPCR; Retinoid cycle disease events; The canonical retinoid cycle in rods (twilight vision); Retinoid metabolism and transport	0.01		2.78143e+06		High	Not Found
High	Q9Y2X9	Zinc finger protein 281 OS=Homo sapiens OX=9606 GN=ZNF281 PE=1 SV=1	1	1	1	cell differentiation;metabolic process;regulation of biological process	nucleus	DNA binding;metal ion binding;protein binding	ZNF281	1			0.01		1.62873e+06		High	Not Found
High	Q5TKA1	Protein lin-9 homolog OS=Homo sapiens OX=9606 GN=LIN9 PE=1 SV=1	4	1	1	metabolic process;regulation of biological process	nucleus	protein binding	LIN9	1		Transcription of E2F targets under negative control by p107 (RBL1) and p130 (RBL2) in complex with HDAC1; Cyclin E associated events during G1/S transition ; Polo-like kinase mediated events; Activation of E2F1 target genes at G1/S; Transcription of E2F targets under negative control by DREAM complex; Cyclin A:Cdk2-associated events at S phase entry	0.01		653627		High	Not Found
High	O14757	Serine/threonine-protein kinase Chk1 OS=Homo sapiens OX=9606 GN=CHEK1 PE=1 SV=2	2	1	1	cell death;cell organization and biogenesis;metabolic process;regulation of biological process;response to stimulus	chromosome;cytoplasm;cytoskeleton;cytosol;nucleus	catalytic activity;nucleotide binding;protein binding	CHEK1	11	Viral carcinogenesis; HTLV-I infection; p53 signaling pathway; Cell cycle	Chk1/Chk2(Cds1) mediated inactivation of Cyclin B:Cdk1 complex; Ubiquitin Mediated Degradation of Phosphorylated Cdc25A; Presynaptic phase of homologous DNA pairing and strand exchange; Transcriptional Regulation by E2F6; Activation of ATR in response to replication stress; TP53 Regulates Transcription of DNA Repair Genes; Processing of DNA double-strand break ends; Signaling by SCF-KIT; Regulati…	0.01		559505		High	Not Found
High	Q8N9N2	Activating signal cointegrator 1 complex subunit 1 OS=Homo sapiens OX=9606 GN=ASCC1 PE=1 SV=1	2	1	1	metabolic process;regulation of biological process	nucleus	protein binding;RNA binding	ASCC1	10		ALKBH3 mediated reversal of alkylation damage	0.01		2.44553e+06		High	Not Found
High	P08603	Complement factor H OS=Homo sapiens OX=9606 GN=CFH PE=1 SV=4	1	1	1	defense response;metabolic process;regulation of biological process;response to stimulus	extracellular	protein binding	CFH	1	Complement and coagulation cascades; Staphylococcus aureus infection	Regulation of Complement cascade	0.01		955057		High	Not Found
High	P50542	Peroxisomal targeting signal 1 receptor OS=Homo sapiens OX=9606 GN=PEX5 PE=1 SV=3	2	1	1	cell organization and biogenesis;metabolic process;regulation of biological process;transport	cytoplasm;cytosol;Golgi;membrane;organelle lumen	protein binding	PEX5	12	Peroxisome	E3 ubiquitin ligases ubiquitinate target proteins	0.01		725099		High	Not Found
High	Q0PNE2	Elongator complex protein 6 OS=Homo sapiens OX=9606 GN=ELP6 PE=1 SV=1	6	1	1	metabolic process;regulation of biological process			ELP6	3		HATs acetylate histones	0.01		665372		High	Not Found
High	Q96EU7	C1GALT1-specific chaperone 1 OS=Homo sapiens OX=9606 GN=C1GALT1C1 PE=1 SV=1	4	1	1	cell organization and biogenesis;metabolic process	membrane	catalytic activity;protein binding	C1GALT1C1	X	Mucin type O-glycan biosynthesis; Metabolic pathways	O-linked glycosylation of mucins; Defective C1GALT1C1 causes Tn polyagglutination syndrome (TNPS)	0.01		820808		High	Not Found
High	Q9Y666	Solute carrier family 12 member 7 OS=Homo sapiens OX=9606 GN=SLC12A7 PE=1 SV=3	1	1	1	cell communication;cellular homeostasis;transport	membrane	catalytic activity;protein binding;transporter activity	SLC12A7	5	Collecting duct acid secretion	Cation-coupled Chloride cotransporters	0.01		884506		High	Not Found
High	Q9BRT3	Migration and invasion enhancer 1 OS=Homo sapiens OX=9606 GN=MIEN1 PE=1 SV=1	10	1	1	cell death;regulation of biological process	cytoplasm;cytosol;membrane	protein binding	MIEN1	17			0.01		1.01959e+06		High	Not Found
High	Q6ZSS7	Major facilitator superfamily domain-containing protein 6 OS=Homo sapiens OX=9606 GN=MFSD6 PE=1 SV=2	2	1	1	transport	membrane		MFSD6	2			0.01		574429		High	Not Found
High	Q86SQ7	Serologically defined colon cancer antigen 8 OS=Homo sapiens OX=9606 GN=SDCCAG8 PE=1 SV=1	1	1	1	cell organization and biogenesis;cellular component movement;regulation of biological process;transport	cytoplasm;cytoskeleton;cytosol	protein binding;transporter activity	SDCCAG8	1; CHR_HSCHR1_3_CTG32_1		Regulation of PLK1 Activity at G2/M Transition; AURKA Activation by TPX2; Anchoring of the basal body to the plasma membrane; Recruitment of NuMA to mitotic centrosomes; Loss of Nlp from mitotic centrosomes; Recruitment of mitotic centrosome proteins and complexes	0.01		665726		High	Not Found
High	Q9P2E3	NFX1-type zinc finger-containing protein 1 OS=Homo sapiens OX=9606 GN=ZNFX1 PE=2 SV=2	1	1	1	regulation of biological process	nucleus	catalytic activity;DNA binding;metal ion binding;nucleotide binding;RNA binding	ZNFX1	20			0.01		1.16979e+06		High	Not Found
High	O00462	Beta-mannosidase OS=Homo sapiens OX=9606 GN=MANBA PE=1 SV=3	1	1	1	metabolic process;transport	membrane;organelle lumen;vacuole	catalytic activity	MANBA	4	Lysosome; Other glycan degradation	Neutrophil degranulation; Lysosomal oligosaccharide catabolism	0.01		310268		High	Not Found
High	Q9NP64	Nucleolar protein of 40 kDa OS=Homo sapiens OX=9606 GN=ZCCHC17 PE=1 SV=1	4	1	1		nucleus	metal ion binding;protein binding;RNA binding	ZCCHC17	1			0.01		983541		High	Not Found
High	Q9NZQ3	NCK-interacting protein with SH3 domain OS=Homo sapiens OX=9606 GN=NCKIPSD PE=1 SV=1	2	1	1	cell organization and biogenesis;regulation of biological process;response to stimulus;transport	cytosol;nucleus	protein binding	NCKIPSD	3		Regulation of actin dynamics for phagocytic cup formation; RHO GTPases Activate WASPs and WAVEs	0.01		443448		High	Not Found
High	Q96QG7	Myotubularin-related protein 9 OS=Homo sapiens OX=9606 GN=MTMR9 PE=1 SV=1	2	1	1	metabolic process;regulation of biological process	cytoplasm;cytosol	catalytic activity;enzyme regulator activity;protein binding	MTMR9	8		Synthesis of PIPs at the plasma membrane; Synthesis of PIPs at the late endosome membrane; Synthesis of IP2, IP, and Ins in the cytosol	0.01		1.24451e+06		High	Not Found
High	O43462	Membrane-bound transcription factor site-2 protease OS=Homo sapiens OX=9606 GN=MBTPS2 PE=1 SV=1	2	1	1	metabolic process;regulation of biological process;response to stimulus	cytoplasm;membrane	catalytic activity;metal ion binding;protein binding	MBTPS2	X	Protein processing in endoplasmic reticulum	Assembly of active LPL and LIPC lipase complexes; CREB3 factors activate genes; ATF6 (ATF6-alpha) activates chaperones; Regulation of cholesterol biosynthesis by SREBP (SREBF)	0.01		3004379		High	Not Found
High	Q15811	Intersectin-1 OS=Homo sapiens OX=9606 GN=ITSN1 PE=1 SV=3	1	1	1	cell organization and biogenesis;cellular component movement;metabolic process;regulation of biological process;response to stimulus;transport	cytosol;membrane	catalytic activity;enzyme regulator activity;metal ion binding;nucleotide binding;protein binding;structural molecule activity	ITSN1	21		Cargo recognition for clathrin-mediated endocytosis; G alpha (12/13) signalling events; EPHB-mediated forward signaling; NRAGE signals death through JNK; Rho GTPase cycle; Signalling by NGF	0.01		1.58564e+06		High	Not Found
High	Q5T5C0	Syntaxin-binding protein 5 OS=Homo sapiens OX=9606 GN=STXBP5 PE=1 SV=1	1	2	1	regulation of biological process;transport	cytoplasm;cytosol;membrane	enzyme regulator activity;protein binding	STXBP5	6			0.01		2.61886e+06		High	Not Found
High	Q9Y6G5	COMM domain-containing protein 10 OS=Homo sapiens OX=9606 GN=COMMD10 PE=1 SV=1	7	1	1	metabolic process;regulation of biological process	cytoplasm;nucleus	protein binding	COMMD10	5		Neddylation	0.01		669518		High	Not Found
High	Q9UHN1	DNA polymerase subunit gamma-2, mitochondrial OS=Homo sapiens OX=9606 GN=POLG2 PE=1 SV=1	2	1	1	cell organization and biogenesis;metabolic process;response to stimulus	chromosome;mitochondrion;organelle lumen	catalytic activity;DNA binding;protein binding	POLG2	17	Metabolic pathways	Transcriptional activation of mitochondrial biogenesis	0.01		1.25004e+06		High	Not Found
High	Q8TB22	Spermatogenesis-associated protein 20 OS=Homo sapiens OX=9606 GN=SPATA20 PE=2 SV=3	1	1	1	cell differentiation;development	extracellular	catalytic activity	SPATA20	17			0.01		622109		High	Not Found
High	Q8TF66	Leucine-rich repeat-containing protein 15 OS=Homo sapiens OX=9606 GN=LRRC15 PE=2 SV=2	2	1	1	regulation of biological process;response to stimulus	cytoplasm;membrane	enzyme regulator activity;protein binding	LRRC15	3			0.01		967332		High	Not Found
High	Q99871	HAUS augmin-like complex subunit 7 OS=Homo sapiens OX=9606 GN=HAUS7 PE=1 SV=3	2	1	1	cell division;cell organization and biogenesis;regulation of biological process	cytoplasm;cytoskeleton;cytosol	protein binding	HAUS7	X		Regulation of PLK1 Activity at G2/M Transition; AURKA Activation by TPX2; Anchoring of the basal body to the plasma membrane; Recruitment of NuMA to mitotic centrosomes; Loss of Nlp from mitotic centrosomes; Recruitment of mitotic centrosome proteins and complexes	0.01		590017		High	Not Found
High	P02679	Fibrinogen gamma chain OS=Homo sapiens OX=9606 GN=FGG PE=1 SV=3	2	3	1	cell organization and biogenesis;coagulation;metabolic process;regulation of biological process;response to stimulus;transport	cell surface;cytoplasm;extracellular;membrane;organelle lumen	catalytic activity;metal ion binding;protein binding;structural molecule activity	FGG	4	Complement and coagulation cascades; Staphylococcus aureus infection; Platelet activation	Post-translational protein phosphorylation; Integrin cell surface interactions; Regulation of Insulin-like Growth Factor (IGF) transport and uptake by Insulin-like Growth Factor Binding Proteins (IGFBPs); Signaling by BRAF and RAF fusions; MAP2K and MAPK activation; GRB2:SOS provides linkage to MAPK signaling for Integrins ; Signaling by RAS mutants; Signaling by high-kinase activity BRAF mutants…	0.01		1.7769e+07		High	Not Found
High	Q8IYJ1	Copine-9 OS=Homo sapiens OX=9606 GN=CPNE9 PE=1 SV=3	4	2	1	cell differentiation		protein binding	CPNE9	3			0.01		793156		High	Not Found	Met-loss [N-Term]
High	Q9ULJ8	Neurabin-1 OS=Homo sapiens OX=9606 GN=PPP1R9A PE=1 SV=2	1	2	1	cell differentiation;cell organization and biogenesis;development;metabolic process;regulation of biological process;response to stimulus	cytoplasm;cytoskeleton;cytosol	protein binding	PPP1R9A	7			0.01		357931		High	Not Found
High	Q86SQ9	Dehydrodolichyl diphosphate synthase complex subunit DHDDS OS=Homo sapiens OX=9606 GN=DHDDS PE=1 SV=3	3	1	1	metabolic process	endoplasmic reticulum;membrane	catalytic activity;protein binding	DHDDS	1	Terpenoid backbone biosynthesis	Synthesis of Dolichyl-phosphate; Defective DHDDS causes retinitis pigmentosa 59	0.01		532936		High	Not Found
High	P55196	Afadin OS=Homo sapiens OX=9606 GN=AFDN PE=1 SV=3	1	1	1	cell communication;cell organization and biogenesis;regulation of biological process;response to stimulus	cytosol;membrane	protein binding	MLLT4; AFDN	6	Tight junction; Rap1 signaling pathway; Adherens junction; Leukocyte transendothelial migration; Ras signaling pathway; cAMP signaling pathway		0.01		628035		High	Not Found
High	Q99081	Transcription factor 12 OS=Homo sapiens OX=9606 GN=TCF12 PE=1 SV=1	2	1	1	cell differentiation;development;metabolic process;regulation of biological process;response to stimulus	cytoplasm;nucleus	DNA binding;protein binding	TCF12	15		CDO in myogenesis; RUNX1 regulates transcription of genes involved in differentiation of HSCs	0.01		918439		High	Not Found
High	Q9H501	ESF1 homolog OS=Homo sapiens OX=9606 GN=ESF1 PE=1 SV=1	1	1	1	metabolic process;regulation of biological process	nucleus	RNA binding	ESF1	20			0.01		828198		High	Not Found
High	O43493	Trans-Golgi network integral membrane protein 2 OS=Homo sapiens OX=9606 GN=TGOLN2 PE=1 SV=3	2	1	1								0.01		449468		High	Not Found
High	P0C2W1	F-box/SPRY domain-containing protein 1 OS=Homo sapiens OX=9606 GN=FBXO45 PE=1 SV=1	4	1	1	cell organization and biogenesis;cellular component movement;development;metabolic process;response to stimulus	membrane	protein binding	FBXO45	3			0.01		682413		High	Not Found
High	Q13588	GRB2-related adapter protein OS=Homo sapiens OX=9606 GN=GRAP PE=1 SV=1	6	2	1	cell communication;cell differentiation;cellular component movement;defense response;metabolic process;regulation of biological process;response to stimulus	cytoplasm;cytosol	catalytic activity;protein binding	GRAP	17		Signaling by SCF-KIT	0.01		1.74171e+06		High	Not Found
High	Q9H0X4	Protein FAM234A OS=Homo sapiens OX=9606 GN=FAM234A PE=1 SV=1	2	1	1		cell surface;membrane		ITFG3; FAM234A	16			0.01		1.02831e+06		High	Not Found
High	A0A0B4J2F0	Protein PIGBOS1 OS=Homo sapiens OX=9606 GN=PIGBOS1 PE=3 SV=1	22	1	1		extracellular		LOC101928527; PIGBOS1	15			0.01		1.75327e+06		High	Not Found
High	P61803	Dolichyl-diphosphooligosaccharide--protein glycosyltransferase subunit DAD1 OS=Homo sapiens OX=9606 GN=DAD1 PE=1 SV=3	11	1	1	cell death;metabolic process;regulation of biological process;response to stimulus	endoplasmic reticulum;membrane	catalytic activity	DAD1	14	N-Glycan biosynthesis; Protein processing in endoplasmic reticulum; Metabolic pathways	Asparagine N-linked glycosylation	0.01		874897		High	Not Found
High	P01031	Complement C5 OS=Homo sapiens OX=9606 GN=C5 PE=1 SV=4	1	1	1	cellular component movement;defense response;metabolic process;regulation of biological process;response to stimulus	extracellular	enzyme regulator activity;protein binding	C5	9	Prion diseases; Pertussis; Complement and coagulation cascades; Systemic lupus erythematosus; Herpes simplex infection; Staphylococcus aureus infection	Terminal pathway of complement; Peptide ligand-binding receptors; Regulation of Complement cascade; Activation of C3 and C5; G alpha (i) signalling events	0.01		1.74865e+06		High	Not Found
High	Q9NQG6	Mitochondrial dynamics protein MID51 OS=Homo sapiens OX=9606 GN=MIEF1 PE=1 SV=1	2	1	1	cell organization and biogenesis;regulation of biological process	membrane;mitochondrion	nucleotide binding;protein binding	SMCR7L; MIEF1	22			0.01		481713		High	Not Found
High	P02749	Beta-2-glycoprotein 1 OS=Homo sapiens OX=9606 GN=APOH PE=1 SV=3	3	1	1	metabolic process;regulation of biological process;response to stimulus;transport	cell surface;extracellular;organelle lumen	enzyme regulator activity;protein binding	APOH	17		Platelet degranulation	0.01		1.82274e+06		High	Not Found
High	Q9Y4B6	DDB1- and CUL4-associated factor 1 OS=Homo sapiens OX=9606 GN=DCAF1 PE=1 SV=3	1	2	2	cell differentiation;cell organization and biogenesis;metabolic process;regulation of biological process	cytoplasm;nucleus	catalytic activity;nucleotide binding;protein binding	VPRBP; DCAF1	3		Antigen processing: Ubiquitination & Proteasome degradation	0.01		426448		High	Not Found
High	Q7L1W4	Volume-regulated anion channel subunit LRRC8D OS=Homo sapiens OX=9606 GN=LRRC8D PE=1 SV=1	1	1	1	regulation of biological process;response to stimulus;transport	cytoplasm;endoplasmic reticulum;membrane	protein binding;transporter activity	LRRC8D	1		Miscellaneous transport and binding events	0.01		1.05383e+06		High	Not Found
High	Q15022	Polycomb protein SUZ12 OS=Homo sapiens OX=9606 GN=SUZ12 PE=1 SV=3	2	1	1	cell organization and biogenesis;metabolic process;regulation of biological process	nucleus	catalytic activity;DNA binding;metal ion binding;protein binding;RNA binding	SUZ12	17		PKMTs methylate histone lysines; Activation of anterior HOX genes in hindbrain development during early embryogenesis; SUMOylation of chromatin organization proteins; Transcriptional Regulation by E2F6; Regulation of PTEN gene transcription; PRC2 methylates histones and DNA; Oxidative Stress Induced Senescence	0.01		488766		High	Not Found
High	Q96HY7	Probable 2-oxoglutarate dehydrogenase E1 component DHKTD1, mitochondrial OS=Homo sapiens OX=9606 GN=DHTKD1 PE=1 SV=2	1	1	1	cell differentiation;metabolic process	cytosol;mitochondrion;organelle lumen	catalytic activity	DHTKD1	10		Glyoxylate metabolism and glycine degradation	0.01		1.00415e+06		High	Not Found
High	Q96SN8	CDK5 regulatory subunit-associated protein 2 OS=Homo sapiens OX=9606 GN=CDK5RAP2 PE=1 SV=5	1	2	2	cell differentiation;cell organization and biogenesis;metabolic process;regulation of biological process	cytoplasm;cytoskeleton;cytosol;Golgi	DNA binding;protein binding	CDK5RAP2	9		Regulation of PLK1 Activity at G2/M Transition; AURKA Activation by TPX2; Anchoring of the basal body to the plasma membrane; Recruitment of NuMA to mitotic centrosomes; Loss of Nlp from mitotic centrosomes; Recruitment of mitotic centrosome proteins and complexes	0.01		6.22428e+06		High	Not Found
High	P18405	3-oxo-5-alpha-steroid 4-dehydrogenase 1 OS=Homo sapiens OX=9606 GN=SRD5A1 PE=1 SV=1	3	1	1	cell communication;cell differentiation;metabolic process;response to stimulus	cytoplasm;endoplasmic reticulum;membrane	catalytic activity;nucleotide binding	SRD5A1	5	Steroid hormone biosynthesis	Androgen biosynthesis	0.01		940000		High	Not Found
High	Q9NRF2	SH2B adapter protein 1 OS=Homo sapiens OX=9606 GN=SH2B1 PE=1 SV=3	1	1	1	cell organization and biogenesis;coagulation;regulation of biological process;response to stimulus	cytoplasm;cytosol;membrane;nucleus	protein binding;signal transducer activity	SH2B1	16	Neurotrophin signaling pathway	Factors involved in megakaryocyte development and platelet production	0.01		982775		High	Not Found
High	Q9Y296	Trafficking protein particle complex subunit 4 OS=Homo sapiens OX=9606 GN=TRAPPC4 PE=1 SV=1	5	1	1	cell organization and biogenesis;transport	cytosol;endoplasmic reticulum;Golgi;membrane	protein binding	TRAPPC4	11; CHR_HG2217_PATCH		COPII (Coat Protein 2) Mediated Vesicle Transport; RAB GEFs exchange GTP for GDP on RABs; Syndecan interactions	0.01		1.11468e+06		High	Not Found
High	Q9ULM6	CCR4-NOT transcription complex subunit 6 OS=Homo sapiens OX=9606 GN=CNOT6 PE=1 SV=2	2	1	1	metabolic process;regulation of biological process;response to stimulus	cytoplasm;cytosol;membrane;nucleus	catalytic activity;metal ion binding;protein binding;RNA binding	CNOT6	5	RNA degradation	Activation of anterior HOX genes in hindbrain development during early embryogenesis; TP53 regulates transcription of additional cell cycle genes whose exact role in the p53 pathway remain uncertain; Deadenylation of mRNA	0.01		708689		High	Not Found
High	Q9BW71	HIRA-interacting protein 3 OS=Homo sapiens OX=9606 GN=HIRIP3 PE=1 SV=3	1	1	1	cell organization and biogenesis	nucleus	protein binding	HIRIP3	16			0.01		1.13034e+06		High	Not Found
High	Q9BXS6	Nucleolar and spindle-associated protein 1 OS=Homo sapiens OX=9606 GN=NUSAP1 PE=1 SV=1	5	2	2	cell division;cell organization and biogenesis;metabolic process;regulation of biological process	chromosome;cytoplasm;cytoskeleton;nucleus	DNA binding;protein binding;RNA binding	NUSAP1	15			0.01		1.67807e+06		High	Not Found	Met-loss [N-Term]
High	Q68D91	Metallo-beta-lactamase domain-containing protein 2 OS=Homo sapiens OX=9606 GN=MBLAC2 PE=1 SV=3	4	1	1			catalytic activity;metal ion binding	MBLAC2	5			0.01		1.35652e+06		High	Not Found
High	Q9NRN9	Methyltransferase-like protein 5 OS=Homo sapiens OX=9606 GN=METTL5 PE=1 SV=1	4	1	1	metabolic process		catalytic activity	METTL5	2			0.01		1576853		High	Not Found
High	Q9H8M2	Bromodomain-containing protein 9 OS=Homo sapiens OX=9606 GN=BRD9 PE=1 SV=2	1	7	1	cell organization and biogenesis;metabolic process;regulation of biological process		protein binding	BRD9	5			0.01	0	6.7058e+07	160664	High	Peak Found
High	Q14691	DNA replication complex GINS protein PSF1 OS=Homo sapiens OX=9606 GN=GINS1 PE=1 SV=1	8	2	2	cell proliferation;metabolic process	cytoplasm;nucleus	catalytic activity	GINS1	20		Unwinding of DNA	0.01		2.03711e+06		High	Not Found
High	Q9NQZ2	Something about silencing protein 10 OS=Homo sapiens OX=9606 GN=UTP3 PE=1 SV=1	2	1	1	cell organization and biogenesis;development;metabolic process	nucleus	protein binding;RNA binding	UTP3	4		Major pathway of rRNA processing in the nucleolus and cytosol; rRNA modification in the nucleus and cytosol	0.01		3.66889e+06		High	Not Found
High	Q96QT4	Transient receptor potential cation channel subfamily M member 7 OS=Homo sapiens OX=9606 GN=TRPM7 PE=1 SV=1	0	1	1	cell death;cell organization and biogenesis;cellular homeostasis;metabolic process;transport	membrane	catalytic activity;metal ion binding;nucleotide binding;protein binding;transporter activity	TRPM7	15	NOD-like receptor signaling pathway; Mineral absorption	TRP channels	0.01		761154		High	Not Found
High	P02649	Apolipoprotein E OS=Homo sapiens OX=9606 GN=APOE PE=1 SV=1	3	1	1	cell communication;cell organization and biogenesis;cellular homeostasis;metabolic process;regulation of biological process;response to stimulus;transport	cytoplasm;endoplasmic reticulum;endosome;extracellular;Golgi;membrane;nucleus;organelle lumen	antioxidant activity;catalytic activity;enzyme regulator activity;metal ion binding;protein binding;structural molecule activity;transporter activity	APOE	19	Alzheimer's disease	Post-translational protein phosphorylation; Regulation of Insulin-like Growth Factor (IGF) transport and uptake by Insulin-like Growth Factor Binding Proteins (IGFBPs); Retinoid metabolism and transport; Chylomicron remodeling; Scavenging by Class A Receptors; Transcriptional regulation by the AP-2 (TFAP2) family of transcription factors; Signaling by GPCR; HDL remodeling; Chylomicron assembly; C…	0.01		6781758		High	Not Found
High	Q8TCG2	Phosphatidylinositol 4-kinase type 2-beta OS=Homo sapiens OX=9606 GN=PI4K2B PE=1 SV=1	2	1	1	cell organization and biogenesis;defense response;metabolic process;response to stimulus	cytoplasm;cytosol;endosome;membrane	catalytic activity;nucleotide binding	PI4K2B	4	Phosphatidylinositol signaling system; Inositol phosphate metabolism; Metabolic pathways	Synthesis of PIPs at the plasma membrane; Synthesis of PIPs at the Golgi membrane; Synthesis of PIPs at the ER membrane; Synthesis of PIPs at the early endosome membrane	0.01		768197		High	Not Found
High	Q86VU5	Catechol O-methyltransferase domain-containing protein 1 OS=Homo sapiens OX=9606 GN=COMTD1 PE=1 SV=1	7	1	1	metabolic process	membrane;mitochondrion	catalytic activity;protein binding	COMTD1	10			0.01		463922		High	Not Found
High	Q96IW7	Vesicle-trafficking protein SEC22a OS=Homo sapiens OX=9606 GN=SEC22A PE=1 SV=1	4	1	1	cell organization and biogenesis;transport	endoplasmic reticulum;membrane	protein binding;transporter activity	SEC22A	3		COPII (Coat Protein 2) Mediated Vesicle Transport	0.01		641550		High	Not Found
High	P02774	Vitamin D-binding protein OS=Homo sapiens OX=9606 GN=GC PE=1 SV=2	2	1	1								0.01		5.33269e+06		High	Not Found
High	P78333	Glypican-5 OS=Homo sapiens OX=9606 GN=GPC5 PE=2 SV=1	2	1	1	metabolic process	extracellular;membrane;organelle lumen	protein binding	GPC5	13		Signaling by GPCR; HS-GAG biosynthesis; A tetrasaccharide linker sequence is required for GAG synthesis; Defective B4GALT7 causes EDS, progeroid type; Release of Hh-Np from the secreting cell; Retinoid metabolism and transport; Defective B3GALT6 causes EDSP2 and SEMDJL1; HS-GAG degradation; Defective EXT2 causes exostoses 2; Defective B3GAT3 causes JDSSDHD; Defective EXT1 causes exostoses 1, TRPS…	0.01		391424		High	Not Found
High	Q9NZJ0	Denticleless protein homolog OS=Homo sapiens OX=9606 GN=DTL PE=1 SV=3	2	2	2	metabolic process;regulation of biological process;response to stimulus	chromosome;cytoplasm;cytoskeleton;cytosol;membrane;nucleus	catalytic activity;protein binding	DTL	1		Neddylation; Recognition of DNA damage by PCNA-containing replication complex	0.01		600237		High	Not Found
High	P98088	Mucin-5AC OS=Homo sapiens OX=9606 GN=MUC5AC PE=1 SV=4	0	1	1	metabolic process;regulation of biological process;response to stimulus	cytoplasm;extracellular;membrane;organelle lumen	protein binding;structural molecule activity	MUC5AC	11; CHR_HG107_PATCH		Defective GALNT3 causes familial hyperphosphatemic tumoral calcinosis (HFTC); Dectin-2 family; Defective GALNT12 causes colorectal cancer 1 (CRCS1); Termination of O-glycan biosynthesis; Defective C1GALT1C1 causes Tn polyagglutination syndrome (TNPS)	0.01		269810		High	Not Found
High	Q9UHY8	Fasciculation and elongation protein zeta-2 OS=Homo sapiens OX=9606 GN=FEZ2 PE=1 SV=2	3	1	1	cellular component movement;regulation of biological process;response to stimulus	cytoplasm	protein binding	FEZ2	2			0.01		610761		High	Not Found
High	Q96EI5	Transcription elongation factor A protein-like 4 OS=Homo sapiens OX=9606 GN=TCEAL4 PE=1 SV=2	7	1	1	metabolic process;regulation of biological process	nucleus	protein binding	TCEAL4	X			0.01		363947		High	Not Found
High	Q16706	Alpha-mannosidase 2 OS=Homo sapiens OX=9606 GN=MAN2A1 PE=1 SV=2	1	1	1	cell organization and biogenesis;metabolic process;regulation of biological process	Golgi;membrane	catalytic activity;metal ion binding	MAN2A1	5	N-Glycan biosynthesis; Metabolic pathways	Intra-Golgi traffic; Reactions specific to the complex N-glycan synthesis pathway	0.01		2.14412e+06		High	Not Found
High	Q38SD2	Leucine-rich repeat serine/threonine-protein kinase 1 OS=Homo sapiens OX=9606 GN=LRRK1 PE=1 SV=3	1	3	2	metabolic process;regulation of biological process;response to stimulus	cytoplasm;cytosol;mitochondrion	catalytic activity;metal ion binding;nucleotide binding;protein binding;signal transducer activity	LRRK1	15			0.01		1.9412e+06		High	Not Found
High	Q14527	Helicase-like transcription factor OS=Homo sapiens OX=9606 GN=HLTF PE=1 SV=2	2	2	2	cell organization and biogenesis;metabolic process;regulation of biological process;response to stimulus	cytoplasm;membrane;nucleus	catalytic activity;DNA binding;metal ion binding;nucleotide binding;protein binding;RNA binding	HLTF	3		E3 ubiquitin ligases ubiquitinate target proteins	0.01		4.83818e+06		High	Not Found
High	Q8IZR5	CKLF-like MARVEL transmembrane domain-containing protein 4 OS=Homo sapiens OX=9606 GN=CMTM4 PE=1 SV=1	4	1	1	regulation of biological process;response to stimulus	membrane	protein binding	CMTM4	16			0.01		1.00963e+06		High	Not Found
High	O75956	Cyclin-dependent kinase 2-associated protein 2 OS=Homo sapiens OX=9606 GN=CDK2AP2 PE=1 SV=1	6	1	1	metabolic process;regulation of biological process	cytoplasm;nucleus	catalytic activity;protein binding	CDK2AP2	11			0.01		1.1749e+06		High	Not Found
High	O43731	ER lumen protein-retaining receptor 3 OS=Homo sapiens OX=9606 GN=KDELR3 PE=2 SV=1	4	2	2	transport	endoplasmic reticulum;membrane		KDELR3	22	Vibrio cholerae infection	COPI-dependent Golgi-to-ER retrograde traffic; COPI-mediated anterograde transport; XBP1(S) activates chaperone genes	0.01		614932		High	Not Found
High	Q9NPF5	DNA methyltransferase 1-associated protein 1 OS=Homo sapiens OX=9606 GN=DMAP1 PE=1 SV=1	2	1	1	cell organization and biogenesis;metabolic process;regulation of biological process;response to stimulus	cytoplasm;cytosol;nucleus	protein binding	DMAP1	1		HATs acetylate histones	0.01		361984		High	Not Found
High	Q14191	Werner syndrome ATP-dependent helicase OS=Homo sapiens OX=9606 GN=WRN PE=1 SV=2	1	1	1	cell communication;cell organization and biogenesis;metabolic process;regulation of biological process;response to stimulus;transport	cytoplasm;nucleus	catalytic activity;DNA binding;metal ion binding;nucleotide binding;protein binding	WRN	8		G2/M DNA damage checkpoint; Presynaptic phase of homologous DNA pairing and strand exchange; Resolution of D-loop Structures through Synthesis-Dependent Strand Annealing (SDSA); Processing of DNA double-strand break ends; HDR through Single Strand Annealing (SSA); Regulation of TP53 Activity through Phosphorylation; SUMOylation of DNA damage response and repair proteins; Resolution of D-loop Stru…	0.01		141409		High	Not Found
High	Q8N573	Oxidation resistance protein 1 OS=Homo sapiens OX=9606 GN=OXR1 PE=1 SV=2	1	1	1	cell death;metabolic process;regulation of biological process;response to stimulus	mitochondrion	catalytic activity;protein binding	OXR1	8			0.01		205385		High	Not Found
High	Q14624	Inter-alpha-trypsin inhibitor heavy chain H4 OS=Homo sapiens OX=9606 GN=ITIH4 PE=1 SV=4	1	1	1	defense response;metabolic process;regulation of biological process;response to stimulus;transport	cytoplasm;extracellular;membrane;organelle lumen	enzyme regulator activity;protein binding	ITIH4	3		Platelet degranulation	0.01		4.21211e+06		High	Not Found
High	P00747	Plasminogen OS=Homo sapiens OX=9606 GN=PLG PE=1 SV=2	2	1	1	cell differentiation;cell organization and biogenesis;cellular component movement;cellular homeostasis;coagulation;metabolic process;regulation of biological process;transport	cell surface;extracellular;membrane;organelle lumen	catalytic activity;protein binding	PLG	6	Neuroactive ligand-receptor interaction; Complement and coagulation cascades; Staphylococcus aureus infection; Influenza A	Platelet degranulation ; Dissolution of Fibrin Clot; Activation of Matrix Metalloproteinases; Regulation of Insulin-like Growth Factor (IGF) transport and uptake by Insulin-like Growth Factor Binding Proteins (IGFBPs); Signaling by PDGF	0.01		1.22256e+06		High	Not Found
High	Q86SX3	Tubulin epsilon and delta complex protein 1 OS=Homo sapiens OX=9606 GN=TEDC1 PE=1 SV=2	3	1	1			protein binding	C14orf80; TEDC1	14			0.01		260498		High	Not Found
High	Q8TE04	Pantothenate kinase 1 OS=Homo sapiens OX=9606 GN=PANK1 PE=1 SV=2	2	1	1	metabolic process	cytoplasm;cytosol;endosome;nucleus	catalytic activity;nucleotide binding	PANK1	10	Pantothenate and CoA biosynthesis; Metabolic pathways	Coenzyme A biosynthesis	0.01		866268		High	Not Found
High	O75414	Nucleoside diphosphate kinase 6 OS=Homo sapiens OX=9606 GN=NME6 PE=1 SV=3	7	1	1	cell death;metabolic process;regulation of biological process	cytosol;mitochondrion	catalytic activity;metal ion binding;nucleotide binding	NME6	3	Purine metabolism; Metabolic pathways; Pyrimidine metabolism	Interconversion of nucleotide di- and triphosphates	0.01		427447		High	Not Found
High	Q9HCU8	DNA polymerase delta subunit 4 OS=Homo sapiens OX=9606 GN=POLD4 PE=1 SV=1	10	1	1	cell organization and biogenesis;cellular homeostasis;metabolic process;response to stimulus	cytosol;mitochondrion;nucleus	catalytic activity;protein binding	POLD4	11	Homologous recombination; DNA replication; Purine metabolism; Mismatch repair; Base excision repair; HTLV-I infection; Nucleotide excision repair; Metabolic pathways; Pyrimidine metabolism	Mismatch repair (MMR) directed by MSH2:MSH3 (MutSbeta); Mismatch repair (MMR) directed by MSH2:MSH6 (MutSalpha); Gap-filling DNA repair synthesis and ligation in TC-NER; HDR through Homologous Recombination (HRR); Gap-filling DNA repair synthesis and ligation in GG-NER; Dual Incision in GG-NER; Polymerase switching; Termination of translesion DNA synthesis; Recognition of DNA damage by PCNA-conta…	0.01		896381		High	Not Found
High	Q92674	Centromere protein I OS=Homo sapiens OX=9606 GN=CENPI PE=1 SV=2	2	4	1	cell organization and biogenesis	chromosome;cytosol;nucleus	protein binding	CENPI	X		Amplification of signal from unattached kinetochores via a MAD2 inhibitory signal; Separation of Sister Chromatids; Resolution of Sister Chromatid Cohesion; RHO GTPases Activate Formins; Deposition of new CENPA-containing nucleosomes at the centromere	0.01		305791		High	Not Found
High	Q9NXV2	BTB/POZ domain-containing protein KCTD5 OS=Homo sapiens OX=9606 GN=KCTD5 PE=1 SV=1	6	1	1	cell organization and biogenesis;metabolic process	cytoplasm;cytosol;nucleus	protein binding	KCTD5	16			0.01		11921397		High	Not Found
High	Q9Y624	Junctional adhesion molecule A OS=Homo sapiens OX=9606 GN=F11R PE=1 SV=1	2	1	1	cell differentiation;cell organization and biogenesis;cellular component movement;defense response;regulation of biological process;response to stimulus;transport	membrane	protein binding;receptor activity	F11R	1	Tight junction; Cell adhesion molecules (CAMs); Leukocyte transendothelial migration; Epithelial cell signaling in Helicobacter pylori infection	Integrin cell surface interactions; Tight junction interactions; Cell surface interactions at the vascular wall; TGF-beta receptor signaling in EMT (epithelial to mesenchymal transition)	0.01		926035		High	Not Found
High	Q8IYR2	SET and MYND domain-containing protein 4 OS=Homo sapiens OX=9606 GN=SMYD4 PE=2 SV=3	1	1	1	metabolic process		catalytic activity;metal ion binding;protein binding	SMYD4	17			0.01		385547		High	Not Found
High	Q6DHV7	Adenosine deaminase-like protein OS=Homo sapiens OX=9606 GN=ADAL PE=2 SV=2	3	1	1	metabolic process	cytosol	catalytic activity;metal ion binding	ADAL	15		Abacavir metabolism; Purine salvage	0.01		1.52705e+06		High	Not Found
High	Q5VYS8	Terminal uridylyltransferase 7 OS=Homo sapiens OX=9606 GN=TUT7 PE=1 SV=1	1	1	1	metabolic process	cytoplasm;cytosol	catalytic activity;metal ion binding;RNA binding	ZCCHC6	9		Deadenylation of mRNA	0.01		1.09018e+06		High	Not Found
Medium	Q6NXT4	Zinc transporter 6 OS=Homo sapiens OX=9606 GN=SLC30A6 PE=1 SV=2	2	1	1	regulation of biological process;response to stimulus;transport	Golgi;membrane	transporter activity	SLC30A6	2		Insulin processing; Zinc efflux and compartmentalization by the SLC30 family	0.01		339211		High	Not Found	Met-loss [N-Term]
Medium	Q96DE5	Anaphase-promoting complex subunit 16 OS=Homo sapiens OX=9606 GN=ANAPC16 PE=1 SV=1	6	1	1	cell division;metabolic process;regulation of biological process	chromosome;cytoplasm;cytosol;nucleus		ANAPC16	10		Inactivation of APC/C via direct inhibition of the APC/C complex; APC/C:Cdc20 mediated degradation of Cyclin B; Separation of Sister Chromatids; Autodegradation of Cdh1 by Cdh1:APC/C; Conversion from APC/C:Cdc20 to APC/C:Cdh1 in late anaphase; Cdc20:Phospho-APC/C mediated degradation of Cyclin A; APC-Cdc20 mediated degradation of Nek2A; APC/C:Cdh1 mediated degradation of Cdc20 and other APC/C:Cdh…	0.01		46743.4		High	Not Found
Medium	Q02447	Transcription factor Sp3 OS=Homo sapiens OX=9606 GN=SP3 PE=1 SV=3	1	1	1	cell differentiation;metabolic process;regulation of biological process	nucleus	DNA binding;metal ion binding;protein binding	SP3	2		SUMOylation of transcription factors	0.01		430473		High	Not Found
Medium	Q96GN5	Cell division cycle-associated 7-like protein OS=Homo sapiens OX=9606 GN=CDCA7L PE=1 SV=2	2	1	1	cell division;metabolic process;regulation of biological process	cytoplasm;cytosol;nucleus	protein binding	CDCA7L	7			0.01		551127		High	Not Found
Medium	Q9H1D9	DNA-directed RNA polymerase III subunit RPC6 OS=Homo sapiens OX=9606 GN=POLR3F PE=1 SV=1	3	1	1	defense response;metabolic process;regulation of biological process;response to stimulus	cytosol;nucleus	catalytic activity;DNA binding;protein binding	POLR3F	20	Epstein-Barr virus infection; Purine metabolism; Cytosolic DNA-sensing pathway; RNA polymerase; Metabolic pathways; Pyrimidine metabolism	RNA Polymerase III Abortive And Retractive Initiation; RNA Polymerase III Transcription Termination; RNA Polymerase III Transcription Initiation From Type 1 Promoter; RNA Polymerase III Transcription Initiation From Type 3 Promoter; Cytosolic sensors of pathogen-associated DNA ; RNA Polymerase III Chain Elongation; RNA Polymerase III Transcription Initiation From Type 2 Promoter	0.01		1882319		High	Not Found
Medium	Q15649	Zinc finger HIT domain-containing protein 3 OS=Homo sapiens OX=9606 GN=ZNHIT3 PE=1 SV=2	6	1	1	regulation of biological process	cytoplasm;nucleus	metal ion binding;protein binding	ZNHIT3	17; CHR_HSCHR17_7_CTG4			0.01		1945992		High	Not Found
Medium	Q9HB21	Pleckstrin homology domain-containing family A member 1 OS=Homo sapiens OX=9606 GN=PLEKHA1 PE=1 SV=2	3	2	1	cell differentiation;cell organization and biogenesis;metabolic process;regulation of biological process;response to stimulus	cytoplasm;cytosol;membrane;nucleus	protein binding	PLEKHA1	10		Synthesis of PIPs at the plasma membrane	0.01		485259		High	Not Found
Medium	P47224	Guanine nucleotide exchange factor MSS4 OS=Homo sapiens OX=9606 GN=RABIF PE=1 SV=2	9	1	1	cell organization and biogenesis;regulation of biological process;response to stimulus;transport	cytosol;membrane	metal ion binding;protein binding	RABIF	1			0.01		788745		High	Not Found
Medium	Q14135	Transcription cofactor vestigial-like protein 4 OS=Homo sapiens OX=9606 GN=VGLL4 PE=1 SV=4	4	1	1	metabolic process;regulation of biological process	nucleus	protein binding	VGLL4	3			0.01		252044		High	Not Found
Medium	P42336	Phosphatidylinositol 4,5-bisphosphate 3-kinase catalytic subunit alpha isoform OS=Homo sapiens OX=9606 GN=PIK3CA PE=1 SV=2	1	1	1	cell death;cellular component movement;cellular homeostasis;defense response;metabolic process;regulation of biological process;response to stimulus;transport	cytoplasm;cytosol;membrane	catalytic activity;enzyme regulator activity;nucleotide binding;protein binding	PIK3CA	3	Viral carcinogenesis; Chagas disease (American trypanosomiasis); Longevity regulating pathway - multiple species; Amoebiasis; T cell receptor signaling pathway; TNF signaling pathway; Osteoclast differentiation; Hepatitis B; Insulin signaling pathway; HIF-1 signaling pathway; Central carbon metabolism in cancer; Pancreatic cancer; FoxO signaling pathway; Prolactin signaling pathway; MicroRNAs in …	PI3K Cascade; Signaling by FGFR4 in disease; Downstream TCR signaling; PI-3K cascade:FGFR3; PI3K events in ERBB4 signaling; DAP12 signaling; PI-3K cascade:FGFR4; Regulation of signaling by CBL; Signaling by cytosolic FGFR1 fusion mutants; MET activates PI3K/AKT signaling; Role of phospholipids in phagocytosis; G alpha (12/13) signalling events; Constitutive Signaling by EGFRvIII; VEGFA-VEGFR2 Pat…	0.01		216526		High	Not Found
Medium	P61626	Lysozyme C OS=Homo sapiens OX=9606 GN=LYZ PE=1 SV=1	6	1	1	defense response;metabolic process;response to stimulus;transport	extracellular;organelle lumen	catalytic activity;protein binding	LYZ	12	Salivary secretion	Antimicrobial peptides; Neutrophil degranulation; Amyloid fiber formation	0.01		2.75215e+06		High	Not Found
Medium	Q9H967	WD repeat-containing protein 76 OS=Homo sapiens OX=9606 GN=WDR76 PE=1 SV=2	1	1	1	regulation of biological process;response to stimulus	nucleus	DNA binding;protein binding	WDR76	15			0.01		1.39317e+06		High	Not Found
Medium	Q14114	Low-density lipoprotein receptor-related protein 8 OS=Homo sapiens OX=9606 GN=LRP8 PE=1 SV=4	1	1	1	metabolic process;regulation of biological process;response to stimulus;transport	cell surface;extracellular;membrane	metal ion binding;protein binding;receptor activity;signal transducer activity	LRP8	1		Signaling by GPCR; Retinoid metabolism and transport; Platelet sensitization by LDL	0.01		1144823		High	Not Found
Medium	Q8IZW8	Tensin-4 OS=Homo sapiens OX=9606 GN=TNS4 PE=1 SV=3	1	1	1	cell death	cytoplasm;cytoskeleton;cytosol	protein binding	TNS4	17		MET interacts with TNS proteins	0.01		1.1356e+06		High	Not Found
Medium	Q9NZD2	Glycolipid transfer protein OS=Homo sapiens OX=9606 GN=GLTP PE=1 SV=3	4	1	1	metabolic process;transport	cytoplasm;cytosol;membrane	protein binding;transporter activity	GLTP	12		Glycosphingolipid metabolism	0.01		1.2761e+06		High	Not Found
Medium	Q9H6U8	Alpha-1,2-mannosyltransferase ALG9 OS=Homo sapiens OX=9606 GN=ALG9 PE=1 SV=2	3	1	1	metabolic process	endoplasmic reticulum;membrane	catalytic activity	ALG9	11	N-Glycan biosynthesis; Metabolic pathways	Biosynthesis of the N-glycan precursor (dolichol lipid-linked oligosaccharide, LLO) and transfer to a nascent protein; Defective ALG9 causes ALG9-CDG (CDG-1l)	0.01		1.0241e+06		High	Not Found
Medium	O15534	Period circadian protein homolog 1 OS=Homo sapiens OX=9606 GN=PER1 PE=1 SV=2	1	1	1	cell organization and biogenesis;metabolic process;regulation of biological process;response to stimulus	cytoplasm;cytosol;nucleus	DNA binding;protein binding	PER1	17	Circadian entrainment; Circadian rhythm; Herpes simplex infection	BMAL1:CLOCK,NPAS2 activates circadian gene expression	0.01		300072		High	Not Found
Medium	Q8N584	Tetratricopeptide repeat protein 39C OS=Homo sapiens OX=9606 GN=TTC39C PE=2 SV=2	1	1	1			protein binding	TTC39C	18			0.01		1.66814e+06		High	Not Found
Medium	Q96HQ2	CDKN2AIP N-terminal-like protein OS=Homo sapiens OX=9606 GN=CDKN2AIPNL PE=1 SV=1	6	1	1	regulation of biological process;response to stimulus		protein binding	CDKN2AIPNL	5			0.01		548376		High	Not Found
Medium	Q9H6D7	HAUS augmin-like complex subunit 4 OS=Homo sapiens OX=9606 GN=HAUS4 PE=1 SV=1	2	1	1	cell division;cell organization and biogenesis;regulation of biological process	cytoplasm;cytoskeleton;cytosol	protein binding	HAUS4	14		Regulation of PLK1 Activity at G2/M Transition; AURKA Activation by TPX2; Anchoring of the basal body to the plasma membrane; Recruitment of NuMA to mitotic centrosomes; Loss of Nlp from mitotic centrosomes; Recruitment of mitotic centrosome proteins and complexes	0.01		428543		High	Not Found
Medium	Q96Q89	Kinesin-like protein KIF20B OS=Homo sapiens OX=9606 GN=KIF20B PE=1 SV=3	0	11	1	cell division;cell organization and biogenesis;cellular component movement;regulation of biological process	cytoplasm;cytoskeleton;cytosol;nucleus	catalytic activity;motor activity;nucleotide binding;protein binding	KIF20B	10		COPI-dependent Golgi-to-ER retrograde traffic; Kinesins	0.01	0	1272504663	1.20737e+06	High	Peak Found
Medium	P13671	Complement component C6 OS=Homo sapiens OX=9606 GN=C6 PE=1 SV=3	1	1	1	defense response;metabolic process;regulation of biological process;response to stimulus	extracellular	protein binding	C6	5	Prion diseases; Complement and coagulation cascades; Systemic lupus erythematosus	Terminal pathway of complement; Regulation of Complement cascade	0.01		516742		High	Not Found
Medium	Q9NUY8	TBC1 domain family member 23 OS=Homo sapiens OX=9606 GN=TBC1D23 PE=1 SV=3	2	1	1	regulation of biological process	Golgi	protein binding	TBC1D23	3			0.01		693606		High	Not Found
Medium	P59045	NACHT, LRR and PYD domains-containing protein 11 OS=Homo sapiens OX=9606 GN=NLRP11 PE=2 SV=2	1	3	1	metabolic process		catalytic activity;nucleotide binding;protein binding;RNA binding	NLRP11	19			0.01		1.54173e+07		High	Not Found
Medium	Q6ZN54	Differentially expressed in FDCP 8 homolog OS=Homo sapiens OX=9606 GN=DEF8 PE=1 SV=2	1	1	1	regulation of biological process;response to stimulus		metal ion binding	DEF8	16			0.01		3.40827e+06		High	Not Found	Met-loss [N-Term]
Medium	Q8NBF6	Late secretory pathway protein AVL9 homolog OS=Homo sapiens OX=9606 GN=AVL9 PE=1 SV=1	2	1	1	cellular component movement	endosome;membrane		AVL9	7			0.01		1.38156e+06		High	Not Found
Medium	P78337	Pituitary homeobox 1 OS=Homo sapiens OX=9606 GN=PITX1 PE=1 SV=2	3	1	1	development;metabolic process;regulation of biological process	cytoplasm;nucleus	DNA binding;protein binding	PITX1	5			0.01		704221		High	Not Found
Medium	Q9UHK0	Nuclear fragile X mental retardation-interacting protein 1 OS=Homo sapiens OX=9606 GN=NUFIP1 PE=1 SV=2	1	1	1	cell organization and biogenesis;metabolic process;regulation of biological process	nucleus;ribosome	DNA binding;metal ion binding;protein binding;RNA binding	NUFIP1	13			0.01		615950		High	Not Found
Medium	Q9UK33	Zinc finger protein 580 OS=Homo sapiens OX=9606 GN=ZNF580 PE=1 SV=1	7	1	1	defense response;metabolic process;regulation of biological process;response to stimulus	nucleus	DNA binding;metal ion binding;protein binding	ZNF580	19			0.01		1.03697e+06		High	Not Found	Met-loss [N-Term]
Medium	P37287	Phosphatidylinositol N-acetylglucosaminyltransferase subunit A OS=Homo sapiens OX=9606 GN=PIGA PE=1 SV=1	2	1	1	metabolic process;regulation of biological process	endoplasmic reticulum;membrane	catalytic activity;protein binding	PIGA	X	Metabolic pathways; Glycosylphosphatidylinositol (GPI)-anchor biosynthesis	Synthesis of glycosylphosphatidylinositol (GPI)	0.01		397578		High	Not Found
Medium	O96028	Histone-lysine N-methyltransferase NSD2 OS=Homo sapiens OX=9606 GN=NSD2 PE=1 SV=1	1	1	1	cell organization and biogenesis;metabolic process;regulation of biological process;response to stimulus	chromosome;cytoplasm;nucleus	catalytic activity;DNA binding;metal ion binding;protein binding	WHSC1; NSD2	4	Lysine degradation; Transcriptional misregulation in cancer	G2/M DNA damage checkpoint; Recruitment and ATM-mediated phosphorylation of repair and signaling proteins at DNA double strand breaks; Processing of DNA double-strand break ends; PKMTs methylate histone lysines; Nonhomologous End-Joining (NHEJ)	0.01		409894		High	Not Found
Medium	Q92609	TBC1 domain family member 5 OS=Homo sapiens OX=9606 GN=TBC1D5 PE=1 SV=1	1	1	1	cell communication;metabolic process;regulation of biological process;response to stimulus;transport	cytosol;endosome;Golgi;membrane;vacuole	enzyme regulator activity;protein binding	TBC1D5	3			0.01		3.2023e+06		High	Not Found
Medium	Q9NX70	Mediator of RNA polymerase II transcription subunit 29 OS=Homo sapiens OX=9606 GN=MED29 PE=1 SV=1	4	1	1	metabolic process;regulation of biological process	nucleus	protein binding	MED29	19		Transcriptional regulation of white adipocyte differentiation; PPARA activates gene expression	0.01		883901		High	Not Found
Medium	Q9UL42	Paraneoplastic antigen Ma2 OS=Homo sapiens OX=9606 GN=PNMA2 PE=1 SV=2	2	1	1	regulation of biological process	nucleus	protein binding	PNMA2	8			0.01		2.75411e+06		High	Not Found
Medium	Q9NUD5	Zinc finger CCHC domain-containing protein 3 OS=Homo sapiens OX=9606 GN=ZCCHC3 PE=1 SV=2	2	3	1								0.01		4.96411e+06		High	Not Found
Medium	O95619	YEATS domain-containing protein 4 OS=Homo sapiens OX=9606 GN=YEATS4 PE=1 SV=1	3	1	1	cell organization and biogenesis;metabolic process;regulation of biological process	membrane;nucleus	DNA binding;protein binding;structural molecule activity	YEATS4	12		Activation of the TFAP2 (AP-2) family of transcription factors; HATs acetylate histones	0.01		1.47057e+06		High	Not Found
Medium	Q9NYD6	Homeobox protein Hox-C10 OS=Homo sapiens OX=9606 GN=HOXC10 PE=1 SV=2	3	1	1	development;metabolic process;regulation of biological process	nucleus	DNA binding	HOXC10	12			0.01		433754		High	Not Found
Medium	P13051	Uracil-DNA glycosylase OS=Homo sapiens OX=9606 GN=UNG PE=1 SV=2	2	2	1	metabolic process;regulation of biological process;response to stimulus	mitochondrion;nucleus	catalytic activity;DNA binding;protein binding	UNG	12	Primary immunodeficiency; Base excision repair	Recognition and association of DNA glycosylase with site containing an affected pyrimidine; Cleavage of the damaged pyrimidine ; Displacement of DNA glycosylase by APEX1	0.01		3.80118e+06		High	Not Found
Medium	Q13356	RING-type E3 ubiquitin-protein ligase PPIL2 OS=Homo sapiens OX=9606 GN=PPIL2 PE=1 SV=1	1	1	1	cell organization and biogenesis;cellular component movement;metabolic process	cytoplasm;membrane;nucleus;organelle lumen	catalytic activity;protein binding	PPIL2	22	Ubiquitin mediated proteolysis	Basigin interactions	0.01		954367		High	Not Found
Medium	Q8WYA1	Aryl hydrocarbon receptor nuclear translocator-like protein 2 OS=Homo sapiens OX=9606 GN=ARNTL2 PE=1 SV=2	2	1	1	metabolic process;regulation of biological process;response to stimulus	cytoplasm;nucleus	DNA binding;protein binding	ARNTL2	12		BMAL1:CLOCK,NPAS2 activates circadian gene expression	0.01		421803		High	Not Found	Met-loss [N-Term]
Medium	Q12774	Rho guanine nucleotide exchange factor 5 OS=Homo sapiens OX=9606 GN=ARHGEF5 PE=1 SV=3	1	1	1	cell organization and biogenesis;cellular component movement;regulation of biological process;response to stimulus	cytoplasm;cytosol;membrane;nucleus	nucleotide binding;protein binding	ARHGEF5	7		G alpha (12/13) signalling events; NRAGE signals death through JNK; Signalling by NGF; Rho GTPase cycle	0.01		429502		High	Not Found
Medium	Q86TB3	Alpha-protein kinase 2 OS=Homo sapiens OX=9606 GN=ALPK2 PE=2 SV=3	0	1	1	metabolic process	cytoplasm	catalytic activity;enzyme regulator activity;nucleotide binding;protein binding;receptor activity;signal transducer activity	ALPK2	18			0.01		629606		High	Not Found
Medium	Q9UNS1	Protein timeless homolog OS=Homo sapiens OX=9606 GN=TIMELESS PE=1 SV=2	0	1	1	cell division;development;metabolic process;regulation of biological process;response to stimulus	nucleus	protein binding	TIMELESS	12		Processing of DNA double-strand break ends	0.01		716605		High	Not Found
Medium	Q8TE58	A disintegrin and metalloproteinase with thrombospondin motifs 15 OS=Homo sapiens OX=9606 GN=ADAMTS15 PE=2 SV=1	2	1	1	metabolic process	cell surface;extracellular	catalytic activity;metal ion binding	ADAMTS15	11		O-glycosylation of TSR domain-containing proteins; Defective B3GALTL causes Peters-plus syndrome (PpS)	0.01		1.32258e+06		High	Not Found	Met-loss [N-Term]
Medium	O15014	Zinc finger protein 609 OS=Homo sapiens OX=9606 GN=ZNF609 PE=1 SV=2	0	1	1	development;metabolic process;regulation of biological process	nucleus	metal ion binding	ZNF609	15			0.01		1180576		High	Not Found
Medium	Q96EZ8	Microspherule protein 1 OS=Homo sapiens OX=9606 GN=MCRS1 PE=1 SV=1	2	1	1	cell organization and biogenesis;metabolic process;regulation of biological process;response to stimulus	cytoplasm;endoplasmic reticulum;nucleus	catalytic activity;enzyme regulator activity;protein binding;RNA binding	MCRS1	12	Herpes simplex infection	HATs acetylate histones; UCH proteinases; DNA Damage Recognition in GG-NER	0.01		3655675		High	Not Found
Medium	Q9Y2I8	WD repeat-containing protein 37 OS=Homo sapiens OX=9606 GN=WDR37 PE=1 SV=2	1	1	1	metabolic process		protein binding	WDR37	10			0.01		1232861		High	Not Found
Medium	P31151	Protein S100-A7 OS=Homo sapiens OX=9606 GN=S100A7 PE=1 SV=4	8	1	1	cell differentiation;defense response;regulation of biological process;response to stimulus;transport	cytoplasm;cytosol;endoplasmic reticulum;extracellular;nucleus;organelle lumen	metal ion binding;protein binding	S100A7	1		Neutrophil degranulation; Metal sequestration by antimicrobial proteins	0.01		598980		High	Not Found	Met-loss+Acetyl [N-Term]
Medium	Q7Z6K1	THAP domain-containing protein 5 OS=Homo sapiens OX=9606 GN=THAP5 PE=1 SV=2	2	2	1	metabolic process;regulation of biological process	nucleus	DNA binding;metal ion binding;protein binding	THAP5	7			0.01		3.3866e+06		High	Not Found
Medium	Q6ZMV7	Leucine-, glutamate- and lysine-rich protein 1 OS=Homo sapiens OX=9606 GN=LEKR1 PE=2 SV=2	3	1	1				LEKR1	3			0.01		964521		High	Not Found
Medium	Q86Z23	Complement C1q-like protein 4 OS=Homo sapiens OX=9606 GN=C1QL4 PE=2 SV=1	7	1	1	regulation of biological process	extracellular	protein binding	C1QL4	12			0.01		1.67629e+06		High	Not Found
Medium	Q9NZV5	Selenoprotein N OS=Homo sapiens OX=9606 GN=SELENON PE=1 SV=5	1	2	1	metabolic process;regulation of biological process	endoplasmic reticulum;membrane	catalytic activity;metal ion binding;protein binding	SEPN1; SELENON	1			0.01		2413988		High	Not Found
Medium	Q9UL54	Serine/threonine-protein kinase TAO2 OS=Homo sapiens OX=9606 GN=TAOK2 PE=1 SV=2	1	1	1	cell death;cell organization and biogenesis;cellular component movement;metabolic process;regulation of biological process;response to stimulus;transport	cytoplasm;cytoskeleton;cytosol;membrane;nucleus	catalytic activity;nucleotide binding;protein binding;signal transducer activity	TAOK2	16	MAPK signaling pathway		0.01		1.35716e+06		High	Not Found
Medium	Q17R98	Zinc finger protein 827 OS=Homo sapiens OX=9606 GN=ZNF827 PE=1 SV=1	1	1	1	metabolic process;regulation of biological process	nucleus	DNA binding;metal ion binding;protein binding	ZNF827	4			0.01		23516956		High	Not Found
Medium	Q96DF8	Splicing factor ESS-2 homolog OS=Homo sapiens OX=9606 GN=ESS2 PE=1 SV=1	2	1	1	metabolic process	nucleus;spliceosomal complex	protein binding	DGCR14; ESS2	22			0.01		955597		High	Not Found
Medium	O75362	Zinc finger protein 217 OS=Homo sapiens OX=9606 GN=ZNF217 PE=1 SV=1	2	1	1	development;metabolic process;regulation of biological process;response to stimulus	nucleus	DNA binding;metal ion binding;protein binding	ZNF217	20			0.01		1.10296e+06		High	Not Found
Medium	Q4G0F5	Vacuolar protein sorting-associated protein 26B OS=Homo sapiens OX=9606 GN=VPS26B PE=1 SV=2	4	2	1	regulation of biological process;transport	cytoplasm;cytosol;endosome;membrane	protein binding;transporter activity	VPS26B	11	Endocytosis		0.01		381516		High	Not Found
Medium	Q9P0U4	CXXC-type zinc finger protein 1 OS=Homo sapiens OX=9606 GN=CXXC1 PE=1 SV=2	2	1	1	cell organization and biogenesis;metabolic process;regulation of biological process	cytosol;nucleus	catalytic activity;DNA binding;metal ion binding;protein binding	CXXC1	18		XBP1(S) activates chaperone genes	0.01		244651		High	Not Found
Medium	Q8N5G2	Macoilin OS=Homo sapiens OX=9606 GN=MACO1 PE=1 SV=1	1	1	1		membrane;nucleus	catalytic activity;motor activity	TMEM57; MACO1	1			0.01		337627		High	Not Found
Medium	Q719H9	BTB/POZ domain-containing protein KCTD1 OS=Homo sapiens OX=9606 GN=KCTD1 PE=1 SV=1	3	1	1	cell organization and biogenesis;metabolic process;regulation of biological process;transport	nucleus	protein binding;transporter activity	KCTD1	18		Negative regulation of activity of TFAP2 (AP-2) family transcription factors	0.01		1.54247e+06		High	Not Found
Medium	P38435	Vitamin K-dependent gamma-carboxylase OS=Homo sapiens OX=9606 GN=GGCX PE=1 SV=2	1	1	1	coagulation;metabolic process	endoplasmic reticulum;membrane	catalytic activity	GGCX	2	Ubiquinone and other terpenoid-quinone biosynthesis	Gamma-carboxylation of protein precursors	0.01		81497.8		High	Not Found
Medium	P02748	Complement component C9 OS=Homo sapiens OX=9606 GN=C9 PE=1 SV=2	1	1	1	cell organization and biogenesis;defense response;metabolic process;regulation of biological process;response to stimulus	cytosol;extracellular;membrane	protein binding	C9	5	Amoebiasis; Prion diseases; Complement and coagulation cascades; Systemic lupus erythematosus	Terminal pathway of complement; Regulation of Complement cascade	0.01		3.07875e+06		High	Not Found
Medium	P02686	Myelin basic protein OS=Homo sapiens OX=9606 GN=MBP PE=1 SV=3	5	1	1	cell communication;cell organization and biogenesis;metabolic process;regulation of biological process;response to stimulus	membrane;nucleus	protein binding;structural molecule activity	MBP	18			0.01		218141		High	Not Found
Medium	P22736	Nuclear receptor subfamily 4 group A member 1 OS=Homo sapiens OX=9606 GN=NR4A1 PE=1 SV=1	2	1	1	cell differentiation;cellular component movement;metabolic process;regulation of biological process;response to stimulus	cytoplasm;cytosol;membrane;nucleus	DNA binding;metal ion binding;protein binding;receptor activity;signal transducer activity	NR4A1	12	MAPK signaling pathway; Aldosterone synthesis and secretion; PI3K-Akt signaling pathway	Nuclear Receptor transcription pathway; AKT phosphorylates targets in the nucleus; Constitutive Signaling by AKT1 E17K in Cancer	0.01		180529		High	Not Found
Medium	Q9ULH0	Kinase D-interacting substrate of 220 kDa OS=Homo sapiens OX=9606 GN=KIDINS220 PE=1 SV=3	1	1	1	cell organization and biogenesis;regulation of biological process;response to stimulus	cytosol;endosome;membrane	enzyme regulator activity;protein binding	KIDINS220	2	Neurotrophin signaling pathway	ARMS-mediated activation	0.01		1.50232e+06		High	Not Found
Medium	Q53H47	Histone-lysine N-methyltransferase SETMAR OS=Homo sapiens OX=9606 GN=SETMAR PE=1 SV=2	2	1	1	cell organization and biogenesis;cell proliferation;metabolic process;regulation of biological process;response to stimulus	chromosome;nucleus	catalytic activity;DNA binding;metal ion binding;protein binding	SETMAR	3	Lysine degradation		0.01		758944832		High	Not Found
Medium	Q96GX5	Serine/threonine-protein kinase greatwall OS=Homo sapiens OX=9606 GN=MASTL PE=1 SV=1	2	1	1	cell division;cell organization and biogenesis;metabolic process;regulation of biological process;response to stimulus	cytoplasm;cytoskeleton;nucleus	catalytic activity;nucleotide binding;protein binding	MASTL	10		MASTL Facilitates Mitotic Progression	0.01		499000		High	Not Found
Medium	Q9NQ11	Cation-transporting ATPase 13A2 OS=Homo sapiens OX=9606 GN=ATP13A2 PE=1 SV=2	1	1	1	cell organization and biogenesis;cellular homeostasis;metabolic process;regulation of biological process;response to stimulus;transport	endosome;membrane;organelle lumen;vacuole	catalytic activity;metal ion binding;nucleotide binding;protein binding;transporter activity	ATP13A2	1		Ion transport by P-type ATPases	0.01		515394		High	Not Found
Medium	O15522	Homeobox protein Nkx-2.8 OS=Homo sapiens OX=9606 GN=NKX2-8 PE=2 SV=2	4	1	1	cell organization and biogenesis;development;metabolic process;regulation of biological process	nucleus	DNA binding	NKX2-8	14			0.01		6369231		High	Not Found
Medium	Q9NP08	Homeobox protein HMX1 OS=Homo sapiens OX=9606 GN=HMX1 PE=2 SV=2	4	1	1	development;metabolic process;regulation of biological process	nucleus	DNA binding	HMX1	4			0.01		908188		High	Not Found
Medium	Q8NFW1	Collagen alpha-1(XXII) chain OS=Homo sapiens OX=9606 GN=COL22A1 PE=2 SV=2	1	1	1		cytoplasm;extracellular;organelle lumen		COL22A1	8	Protein digestion and absorption	Collagen chain trimerization	0.01		423946		High	Not Found
Medium	Q7Z3H4	Sterile alpha motif domain-containing protein 7 OS=Homo sapiens OX=9606 GN=SAMD7 PE=1 SV=1	3	1	1		cytoplasm;nucleus	protein binding	SAMD7	3			0.01		6.95319e+06		High	Not Found
Medium	A0PJW8	Death-associated protein-like 1 OS=Homo sapiens OX=9606 GN=DAPL1 PE=1 SV=2	12	2	1	cell communication;cell death;cell differentiation;regulation of biological process;response to stimulus		protein binding	DAPL1	2			0.01		6.62544e+06		High	Not Found
Medium	Q8TF61	F-box only protein 41 OS=Homo sapiens OX=9606 GN=FBXO41 PE=2 SV=5	1	1	1	metabolic process	cytosol	catalytic activity;protein binding	FBXO41	2		Antigen processing: Ubiquitination & Proteasome degradation; Neddylation	0.01		690702		High	Not Found
Medium	P14210	Hepatocyte growth factor OS=Homo sapiens OX=9606 GN=HGF PE=1 SV=2	1	2	1	cell communication;cell organization and biogenesis;cell proliferation;cellular component movement;metabolic process;regulation of biological process;response to stimulus;transport	extracellular;membrane;organelle lumen	catalytic activity;protein binding	HGF	7	Cytokine-cytokine receptor interaction; Rap1 signaling pathway; Pathways in cancer; Renal cell carcinoma; Melanoma; EGFR tyrosine kinase inhibitor resistance; Focal adhesion; Malaria; Proteoglycans in cancer; Ras signaling pathway; PI3K-Akt signaling pathway	MET Receptor Activation; MET activates PTK2 signaling; PI5P, PP2A and IER3 Regulate PI3K/AKT Signaling; MET activates RAP1 and RAC1; Interleukin-7 signaling; MET activates RAS signaling; Platelet degranulation ; MET receptor recycling; MET activates PTPN11; Negative regulation of MET activity; MET interacts with TNS proteins; MET activates STAT3; Constitutive Signaling by Aberrant PI3K in Cancer;…	0.01		3.36587e+06		High	Not Found
Medium	Q96EB6	NAD-dependent protein deacetylase sirtuin-1 OS=Homo sapiens OX=9606 GN=SIRT1 PE=1 SV=2	2	1	1	cell communication;cell death;cell differentiation;cell organization and biogenesis;cellular homeostasis;development;metabolic process;regulation of biological process;response to stimulus	chromosome;cytoplasm;cytosol;membrane;mitochondrion;nucleus	catalytic activity;DNA binding;metal ion binding;nucleotide binding;protein binding	SIRT1	10	Longevity regulating pathway - multiple species; FoxO signaling pathway; MicroRNAs in cancer; Amphetamine addiction; Glucagon signaling pathway; AMPK signaling pathway; Longevity regulating pathway	SIRT1 negatively regulates rRNA expression; RORA activates gene expression; Regulation of HSF1-mediated heat shock response	0.01		268868		High	Not Found
Medium	Q12772	Sterol regulatory element-binding protein 2 OS=Homo sapiens OX=9606 GN=SREBF2 PE=1 SV=2	1	1	1	cell communication;metabolic process;regulation of biological process;response to stimulus	cytoplasm;cytosol;endoplasmic reticulum;Golgi;membrane;mitochondrion;nucleus	catalytic activity;DNA binding;protein binding	SREBF2	22		Transcriptional regulation of white adipocyte differentiation; PPARA activates gene expression; Activation of gene expression by SREBF (SREBP)	0.01		8772325		High	Not Found
Medium	Q3KP66	Innate immunity activator protein OS=Homo sapiens OX=9606 GN=INAVA PE=1 SV=2	1	1	1	defense response;metabolic process;regulation of biological process;response to stimulus	cytoplasm;nucleus	protein binding	C1orf106	1			0.01		382328		High	Not Found
Medium	Q6PI98	INO80 complex subunit C OS=Homo sapiens OX=9606 GN=INO80C PE=1 SV=1	4	1	1	cell organization and biogenesis;metabolic process;regulation of biological process;response to stimulus	nucleus		INO80C	18		UCH proteinases; DNA Damage Recognition in GG-NER	0.01		1.64505e+06		High	Not Found
Medium	Q9HC21	Mitochondrial thiamine pyrophosphate carrier OS=Homo sapiens OX=9606 GN=SLC25A19 PE=1 SV=1	3	1	1	metabolic process;transport	membrane;mitochondrion;nucleus	transporter activity	SLC25A19	17		Vitamin B1 (thiamin) metabolism	0.01		5.18458e+06		High	Not Found
Low	P08236	Beta-glucuronidase OS=Homo sapiens OX=9606 GN=GUSB PE=1 SV=2	1	1	1	metabolic process;transport	extracellular;membrane;organelle lumen;vacuole	catalytic activity;protein binding	GUSB	7	Lysosome; Glycosaminoglycan degradation; Porphyrin and chlorophyll metabolism; Pentose and glucuronate interconversions; Metabolic pathways; Drug metabolism - other enzymes	MPS VII - Sly syndrome; Neutrophil degranulation; HS-GAG degradation; Hyaluronan uptake and degradation	0.01		462625		High	Not Found
Low	Q8N567	Zinc finger CCHC domain-containing protein 9 OS=Homo sapiens OX=9606 GN=ZCCHC9 PE=1 SV=2	3	1	1	metabolic process;regulation of biological process	nucleus	metal ion binding;RNA binding	ZCCHC9	5			0.01		406747		High	Not Found
Low	Q9Y2F5	Little elongation complex subunit 1 OS=Homo sapiens OX=9606 GN=ICE1 PE=1 SV=5	1	1	1	metabolic process;regulation of biological process	nucleus	protein binding	KIAA0947; ICE1	5		RNA polymerase II transcribes snRNA genes	0.01		11781356		High	Not Found
Low	Q15572	TATA box-binding protein-associated factor RNA polymerase I subunit C OS=Homo sapiens OX=9606 GN=TAF1C PE=1 SV=2	1	1	1	metabolic process;regulation of biological process	nucleus	DNA binding;protein binding	TAF1C	16		SIRT1 negatively regulates rRNA expression; RNA Polymerase I Transcription Termination; RNA Polymerase I Chain Elongation; NoRC negatively regulates rRNA expression; RNA Polymerase I Promoter Escape; B-WICH complex positively regulates rRNA expression; RNA Polymerase I Transcription Initiation	0.01		782218		High	Not Found
Low	Q9BSK2	Solute carrier family 25 member 33 OS=Homo sapiens OX=9606 GN=SLC25A33 PE=1 SV=1	2	1	1	cell organization and biogenesis;metabolic process;regulation of biological process;response to stimulus;transport	membrane;mitochondrion	transporter activity	SLC25A33	1			0.01		1.04114e+06		High	Not Found
Low	Q8NGW6	Olfactory receptor 6K6 OS=Homo sapiens OX=9606 GN=OR6K6 PE=2 SV=2	5	1	1	regulation of biological process;response to stimulus	membrane	receptor activity;signal transducer activity	OR6K6	1	Olfactory transduction	Olfactory Signaling Pathway; GPCR downstream signalling	0.01		146284		High	Not Found
Low	P16157	Ankyrin-1 OS=Homo sapiens OX=9606 GN=ANK1 PE=1 SV=3	1	1	1	cell organization and biogenesis;regulation of biological process;response to stimulus;transport	cytoplasm;cytoskeleton;cytosol;endoplasmic reticulum;membrane;nucleus	protein binding;structural molecule activity	ANK1	8	Proteoglycans in cancer	CHL1 interactions; NrCAM interactions; Interaction between L1 and Ankyrins; Neurofascin interactions; COPI-mediated anterograde transport	0.01		2.64699e+06		High	Not Found
Low	Q6ZMY3	SPOC domain-containing protein 1 OS=Homo sapiens OX=9606 GN=SPOCD1 PE=2 SV=1	1	1	1	metabolic process;regulation of biological process			SPOCD1	1			0.01		1.18775e+06		High	Not Found
Low	P54296	Myomesin-2 OS=Homo sapiens OX=9606 GN=MYOM2 PE=1 SV=2	1	1	1	cell organization and biogenesis	cytoplasm;mitochondrion	protein binding;structural molecule activity	MYOM2	8; CHR_HSCHR8_8_CTG1			0.01		1.12424e+06		High	Not Found
Low	Q96E29	Transcription termination factor 3, mitochondrial OS=Homo sapiens OX=9606 GN=MTERF3 PE=1 SV=2	2	1	1	cell communication;cell organization and biogenesis;metabolic process;regulation of biological process;response to stimulus	membrane;mitochondrion	DNA binding;protein binding;RNA binding	MTERFD1; MTERF3	8		Pink/Parkin Mediated Mitophagy	0.01		902396		High	Not Found
Low	Q96N21	AP-4 complex accessory subunit Tepsin OS=Homo sapiens OX=9606 GN=TEPSIN PE=1 SV=1	2	1	1		cytoplasm;cytosol;Golgi;membrane	protein binding	ENTHD2; TEPSIN	17			0.01		1.07508e+06		High	Not Found
Low	Q8TEU7	Rap guanine nucleotide exchange factor 6 OS=Homo sapiens OX=9606 GN=RAPGEF6 PE=1 SV=2	0	1	1	cell organization and biogenesis;regulation of biological process;response to stimulus	cytoplasm;cytosol;membrane	protein binding	RAPGEF6	5	Rap1 signaling pathway		0.01		1504329		High	Not Found
Low	Q8WV60	Pentatricopeptide repeat-containing protein 2, mitochondrial OS=Homo sapiens OX=9606 GN=PTCD2 PE=1 SV=3	2	1	1	cell organization and biogenesis;metabolic process;regulation of biological process	mitochondrion	protein binding;RNA binding	PTCD2	5			0.01		822519		High	Not Found
Low	Q8NGY7	Putative olfactory receptor 10J6 OS=Homo sapiens OX=9606 GN=OR10J6P PE=5 SV=1	3	1	1	regulation of biological process;response to stimulus	membrane	receptor activity;signal transducer activity	OR10J6P	1		Olfactory Signaling Pathway; GPCR downstream signalling	0.01		4054178		High	Not Found
Low	Q01974	Tyrosine-protein kinase transmembrane receptor ROR2 OS=Homo sapiens OX=9606 GN=ROR2 PE=1 SV=2	1	1	1	cell differentiation;development;metabolic process;regulation of biological process;response to stimulus	cell surface;cytoplasm;membrane	catalytic activity;metal ion binding;nucleotide binding;protein binding;receptor activity;signal transducer activity	ROR2	9		WNT5A-dependent internalization of FZD2, FZD5 and ROR2	0.01		150598		High	Not Found
Low	Q9UIF8	Bromodomain adjacent to zinc finger domain protein 2B OS=Homo sapiens OX=9606 GN=BAZ2B PE=1 SV=3	1	2	1	metabolic process;regulation of biological process	nucleus	DNA binding;metal ion binding;protein binding	BAZ2B	2			0.01		967111		High	Not Found
Low	Q8NCJ5	SPRY domain-containing protein 3 OS=Homo sapiens OX=9606 GN=SPRYD3 PE=1 SV=2	2	1	1			protein binding	SPRYD3	12			0.01		2.75599e+06		High	Not Found
Low	Q02446	Transcription factor Sp4 OS=Homo sapiens OX=9606 GN=SP4 PE=1 SV=2	1	1	1	metabolic process;regulation of biological process	cytosol;nucleus	DNA binding;metal ion binding;protein binding	SP4	7			0.01		413938		High	Not Found
Low	Q96MT8	Centrosomal protein of 63 kDa OS=Homo sapiens OX=9606 GN=CEP63 PE=1 SV=1	1	1	1	cell division;cell organization and biogenesis;metabolic process;regulation of biological process;response to stimulus	cytoplasm;cytoskeleton;cytosol	protein binding	CEP63	3		Regulation of PLK1 Activity at G2/M Transition; AURKA Activation by TPX2; Anchoring of the basal body to the plasma membrane; Recruitment of NuMA to mitotic centrosomes; Loss of Nlp from mitotic centrosomes; Recruitment of mitotic centrosome proteins and complexes	0.01		1.33107e+06		High	Not Found
Low	O94810	Regulator of G-protein signaling 11 OS=Homo sapiens OX=9606 GN=RGS11 PE=1 SV=2	3	1	1	regulation of biological process;response to stimulus	cytoplasm;membrane	enzyme regulator activity;protein binding;signal transducer activity	RGS11	16		Cooperation of PDCL (PhLP1) and TRiC/CCT in G-protein beta folding; G alpha (i) signalling events	0.01		3.76798e+06		High	Not Found	Met-loss [N-Term]
Low	Q9Y385	Ubiquitin-conjugating enzyme E2 J1 OS=Homo sapiens OX=9606 GN=UBE2J1 PE=1 SV=2	5	1	1	metabolic process;regulation of biological process	cytoplasm;endoplasmic reticulum;membrane	catalytic activity;nucleotide binding;protein binding	UBE2J1	6	Ubiquitin mediated proteolysis; Protein processing in endoplasmic reticulum; Parkinson's disease	Antigen processing: Ubiquitination & Proteasome degradation	0.01		5769154		High	Not Found
Low	Q8N130	Sodium-dependent phosphate transport protein 2C OS=Homo sapiens OX=9606 GN=SLC34A3 PE=1 SV=2	1	1	1	cellular homeostasis;transport	cytoplasm;membrane	transporter activity	SLC34A3	9		Type II Na+/Pi cotransporters; Defective SLC34A3 causes Hereditary hypophosphatemic rickets with hypercalciuria (HHRH)	0.01		7307588		High	Not Found
Low	Q9UL33	Trafficking protein particle complex subunit 2-like protein OS=Homo sapiens OX=9606 GN=TRAPPC2L PE=1 SV=1	6	1	1	cell organization and biogenesis;transport	cytoplasm;cytosol;endoplasmic reticulum;Golgi;membrane	protein binding	TRAPPC2L	16		RAB GEFs exchange GTP for GDP on RABs; COPII (Coat Protein 2) Mediated Vesicle Transport	0.01		1.17829e+06		High	Not Found
Low	Q5T011	KICSTOR complex protein SZT2 OS=Homo sapiens OX=9606 GN=SZT2 PE=1 SV=3	0	1	1	cell communication;cell organization and biogenesis;regulation of biological process;response to stimulus	membrane;vacuole	protein binding	SZT2	1			0.01		614147		High	Not Found
Low	Q693B1	BTB/POZ domain-containing protein KCTD11 OS=Homo sapiens OX=9606 GN=KCTD11 PE=1 SV=1	3	1	1	cell differentiation;cell organization and biogenesis;development;metabolic process;regulation of biological process;transport	cytoplasm	catalytic activity;protein binding;transporter activity	KCTD11	17			0.01		2.71732e+06		High	Not Found
Low	O43424	Glutamate receptor ionotropic, delta-2 OS=Homo sapiens OX=9606 GN=GRID2 PE=1 SV=2	1	2	1	cell communication;cell differentiation;regulation of biological process;response to stimulus;transport	membrane	protein binding;receptor activity;signal transducer activity;transporter activity	GRID2	4	Neuroactive ligand-receptor interaction; Long-term depression		0.01		80666192		High	Not Found
Low	Q86YR6	POTE ankyrin domain family member D OS=Homo sapiens OX=9606 GN=POTED PE=2 SV=2	3	1	1	metabolic process	membrane	protein binding	POTED; LOC100288966	21			0.01		2.47389e+06		High	Not Found	Met-loss [N-Term]
Low	Q969F9	Hermansky-Pudlak syndrome 3 protein OS=Homo sapiens OX=9606 GN=HPS3 PE=1 SV=1	1	2	1	cell organization and biogenesis	cytoplasm;cytosol	protein binding	HPS3	3			0.01		1608986		High	Not Found
Low	O60706	ATP-binding cassette sub-family C member 9 OS=Homo sapiens OX=9606 GN=ABCC9 PE=1 SV=2	0	1	1	defense response;metabolic process;regulation of biological process;response to stimulus;transport	membrane	catalytic activity;nucleotide binding;protein binding;receptor activity;signal transducer activity;transporter activity	ABCC9	12	ABC transporters	Ion homeostasis; Defective ABCC9 causes dilated cardiomyopathy 10, familial atrial fibrillation 12 and hypertrichotic osteochondrodysplasia; ATP sensitive Potassium channels; ABC-family proteins mediated transport	0.01		22987182		High	Not Found
Low	P02790	Hemopexin OS=Homo sapiens OX=9606 GN=HPX PE=1 SV=2	1	2	1	cellular homeostasis;metabolic process;regulation of biological process;transport	extracellular;organelle lumen	metal ion binding;protein binding;transporter activity	HPX	11		Scavenging of heme from plasma	0.01		8848627		High	Not Found
Low	Q9BVV6	Protein TALPID3 OS=Homo sapiens OX=9606 GN=KIAA0586 PE=1 SV=4	1	2	1	cell organization and biogenesis;regulation of biological process;response to stimulus	cytoplasm;cytoskeleton		KIAA0586	14			0.01		1.20585e+06		High	Not Found
Low	Q01167	Forkhead box protein K2 OS=Homo sapiens OX=9606 GN=FOXK2 PE=1 SV=3	1	1	1	cell differentiation;metabolic process;regulation of biological process	nucleus	DNA binding;metal ion binding;protein binding	FOXK2	17		UCH proteinases	0.01		1.4976e+06		High	Not Found
Low	Q15311	RalA-binding protein 1 OS=Homo sapiens OX=9606 GN=RALBP1 PE=1 SV=3	1	2	1	regulation of biological process;response to stimulus;transport	cytosol;membrane	catalytic activity;enzyme regulator activity;protein binding;transporter activity	RALBP1	18	Pancreatic cancer; Pathways in cancer; Ras signaling pathway	Rho GTPase cycle	0.01		4.42972e+06		High	Not Found
Low	Q9NXP7	Gypsy retrotransposon integrase-like protein 1 OS=Homo sapiens OX=9606 GN=GIN1 PE=1 SV=3	2	1	1	metabolic process			GIN1	5			0.01		6440609		High	Not Found
Low	P10589	COUP transcription factor 1 OS=Homo sapiens OX=9606 GN=NR2F1 PE=1 SV=1	2	1	1	metabolic process;regulation of biological process;response to stimulus	nucleus	DNA binding;metal ion binding;protein binding;receptor activity;signal transducer activity	NR2F1	5		Nuclear Receptor transcription pathway	0.01		345160		High	Not Found
Low	Q8IZ07	Ankyrin repeat domain-containing protein 13A OS=Homo sapiens OX=9606 GN=ANKRD13A PE=1 SV=3	2	1	1		cytoplasm;endosome;membrane	protein binding	ANKRD13A	12			0.01		604321		High	Not Found
Low	P05090	Apolipoprotein D OS=Homo sapiens OX=9606 GN=APOD PE=1 SV=1	3	1	1	cell organization and biogenesis;metabolic process;regulation of biological process;response to stimulus;transport	endoplasmic reticulum;extracellular;ribosome	protein binding;transporter activity	APOD	3		Transport of fatty acids	0.01		4706634		High	Not Found
Medium	Q8TCU4	Alstrom syndrome protein 1 OS=Homo sapiens OX=9606 GN=ALMS1 PE=1 SV=4	0	6	1								0.014	0	2.97976e+07	420230	High	Peak Found
High	P07477	Trypsin-1 OS=Homo sapiens OX=9606 GN=PRSS1 PE=1 SV=1	11	4	2	cell organization and biogenesis;metabolic process	extracellular	catalytic activity;metal ion binding	PRSS1	7; CHR_HSCHR7_2_CTG6	Neuroactive ligand-receptor interaction; Protein digestion and absorption; Pancreatic secretion; Influenza A	Activation of Matrix Metalloproteinases; Cobalamin (Cbl, vitamin B12) transport and metabolism	0.016	0	6.45256e+07	1.00983e+06	High	Peak Found
High	P35527	Keratin, type I cytoskeletal 9 OS=Homo sapiens OX=9606 GN=KRT9 PE=1 SV=3	51	150	29	cell death;cell organization and biogenesis	cytosol;membrane;nucleus	structural molecule activity	KRT9	17		Formation of the cornified envelope	0.028	139.05	1.26454e+09	2.11916e+07	High	Peak Found
High	P68871	Hemoglobin subunit beta OS=Homo sapiens OX=9606 GN=HBB PE=1 SV=2	22	20	3	cell organization and biogenesis;coagulation;metabolic process;regulation of biological process;response to stimulus;transport	cytosol;extracellular;organelle lumen	antioxidant activity;catalytic activity;metal ion binding;protein binding;transporter activity	HBB	11	Malaria; African trypanosomiasis	Neutrophil degranulation; Scavenging of heme from plasma; Erythrocytes take up carbon dioxide and release oxygen; Erythrocytes take up oxygen and release carbon dioxide; Factors involved in megakaryocyte development and platelet production	0.029	0	2.20699e+08	2.46242e+06	High	Peak Found
High	P01023	Alpha-2-macroglobulin OS=Homo sapiens OX=9606 GN=A2M PE=1 SV=3	4	20	5	cell differentiation;cell organization and biogenesis;metabolic process;regulation of biological process;response to stimulus;transport	cytosol;extracellular;organelle lumen	enzyme regulator activity;protein binding	A2M	12	Complement and coagulation cascades	Platelet degranulation ; Degradation of the extracellular matrix; Rho GTPase cycle; HDL assembly; Intrinsic Pathway of Fibrin Clot Formation	0.03	139.27	1.50167e+08	1.70876e+06	High	Peak Found
High	Q9NZR1	Tropomodulin-2 OS=Homo sapiens OX=9606 GN=TMOD2 PE=1 SV=1	6	5	1	cell communication;cell organization and biogenesis;regulation of biological process;response to stimulus	cytoplasm;cytoskeleton	protein binding	TMOD2	15		Striated Muscle Contraction	0.031	0	1.24194e+07	390549	High	Peak Found
High	Q8NBP7	Proprotein convertase subtilisin/kexin type 9 OS=Homo sapiens OX=9606 GN=PCSK9 PE=1 SV=3	3	1	1	cell communication;cell death;cell differentiation;metabolic process;regulation of biological process;response to stimulus;transport	cell surface;cytoplasm;endoplasmic reticulum;endosome;extracellular;Golgi;membrane;organelle lumen;vacuole	catalytic activity;protein binding;RNA binding	PCSK9	1		Post-translational protein phosphorylation; Regulation of Insulin-like Growth Factor (IGF) transport and uptake by Insulin-like Growth Factor Binding Proteins (IGFBPs); LDL clearance; VLDLR internalisation and degradation	0.034	0	4.70461e+06	157831	High	Peak Found
High	P52895	Aldo-keto reductase family 1 member C2 OS=Homo sapiens OX=9606 GN=AKR1C2 PE=1 SV=3	81	120	16	cell differentiation;metabolic process;regulation of biological process;response to stimulus	cytoplasm	catalytic activity	AKR1C2	10	Chemical carcinogenesis; Steroid hormone biosynthesis	Synthesis of bile acids and bile salts via 27-hydroxycholesterol; Synthesis of bile acids and bile salts via 7alpha-hydroxycholesterol; Synthesis of bile acids and bile salts via 24-hydroxycholesterol	0.036	39.94	8.48744e+08	3.10131e+07	High	Peak Found
Low	P61328	Fibroblast growth factor 12 OS=Homo sapiens OX=9606 GN=FGF12 PE=1 SV=1	5	1	1	cell communication;metabolic process;regulation of biological process;response to stimulus	nucleus	protein binding	FGF12	3	Rap1 signaling pathway; MAPK signaling pathway; Breast cancer; Pathways in cancer; Melanoma; Regulation of actin cytoskeleton; Ras signaling pathway; PI3K-Akt signaling pathway	Phase 0 - rapid depolarisation	0.037	0	60147316	2219927	High	Peak Found	Met-loss [N-Term]
Medium	Q8IYS4	Uncharacterized protein C16orf71 OS=Homo sapiens OX=9606 GN=C16orf71 PE=2 SV=3	1	1	1				C16orf71	16			0.038	0	569817	21672.7	High	Peak Found
High	P69905	Hemoglobin subunit alpha OS=Homo sapiens OX=9606 GN=HBA2 PE=1 SV=2	35	24	5	cell organization and biogenesis;metabolic process;regulation of biological process;response to stimulus;transport	cytosol;extracellular;membrane;organelle lumen	antioxidant activity;catalytic activity;metal ion binding;protein binding;transporter activity	HBA2; HBA1	16	Malaria; African trypanosomiasis	Scavenging of heme from plasma; Erythrocytes take up carbon dioxide and release oxygen; Erythrocytes take up oxygen and release carbon dioxide	0.05	167.79	1.99557e+08	1.68338e+06	High	Peak Found
High	P35908	Keratin, type II cytoskeletal 2 epidermal OS=Homo sapiens OX=9606 GN=KRT2 PE=1 SV=2	46	104	23	cell death;cell organization and biogenesis;cell proliferation;cellular component movement;metabolic process	cytoskeleton;cytosol;membrane;nucleus	protein binding;structural molecule activity	KRT2	12		Formation of the cornified envelope	0.053	59.27	2.55154e+08	4.36647e+06	High	Peak Found
High	Q8WXE9	Stonin-2 OS=Homo sapiens OX=9606 GN=STON2 PE=1 SV=1	1	6	1	cell differentiation;cell organization and biogenesis;regulation of biological process;transport	cytoplasm;cytosol;membrane	protein binding	STON2	14		Cargo recognition for clathrin-mediated endocytosis	0.055	0	3.00128e+07	1.64331e+06	High	Peak Found
Low	O14513	Nck-associated protein 5 OS=Homo sapiens OX=9606 GN=NCKAP5 PE=1 SV=2	0	2	1				NCKAP5	2			0.055	0	20213112	1105980	High	Peak Found
High	P0C221	Coiled-coil domain-containing protein 175 OS=Homo sapiens OX=9606 GN=CCDC175 PE=4 SV=2	1	8	1				CCDC175	14			0.06	0	3.11037e+07	1.88172e+06	High	Peak Found
High	P02769	Serum albumin OS=Bos taurus OX=9913 GN=ALB PE=1 SV=4	78	163	44	cell communication;regulation of biological process;response to stimulus;transport	extracellular	DNA binding;metal ion binding	ALB	6	Thyroid hormone synthesis		0.061	123.01	1.82015e+09	1.49792e+08	High	Peak Found
High	P13645	Keratin, type I cytoskeletal 10 OS=Homo sapiens OX=9606 GN=KRT10 PE=1 SV=6	67	156	35	cell death;cell differentiation;metabolic process	cytoplasm;cytoskeleton;cytosol;membrane;nucleus	structural molecule activity	KRT10	17	Staphylococcus aureus infection	Formation of the cornified envelope	0.061	99.47	8.12845e+08	1.47281e+07	High	Peak Found
High	Q9Y5M8	Signal recognition particle receptor subunit beta OS=Homo sapiens OX=9606 GN=SRPRB PE=1 SV=3	25	11	6	regulation of biological process;response to stimulus	cytoplasm;endoplasmic reticulum;membrane	nucleotide binding	SRPRB	3	Protein export	XBP1(S) activates chaperone genes; SRP-dependent cotranslational protein targeting to membrane	0.065	79.34	3.68877e+07	1.40766e+06	High	Peak Found
Medium	Q96JA4	Membrane-spanning 4-domains subfamily A member 14 OS=Homo sapiens OX=9606 GN=MS4A14 PE=2 SV=2	1	3	1	transport	membrane		MS4A14	11			0.073	0	155583600	11417231	High	Peak Found
Low	Q5VVW2	GTPase-activating Rap/Ran-GAP domain-like protein 3 OS=Homo sapiens OX=9606 GN=GARNL3 PE=2 SV=2	1	1	1	regulation of biological process		enzyme regulator activity	GARNL3	9			0.073	0	53229024	3.89573e+06	High	Peak Found
Medium	Q6P1R3	Myb/SANT-like DNA-binding domain-containing protein 2 OS=Homo sapiens OX=9606 GN=MSANTD2 PE=1 SV=1	3	2	1				MSANTD2	11			0.074	0	1382444	102953	High	Peak Found
Medium	Q7Z5H4	Vomeronasal type-1 receptor 5 OS=Homo sapiens OX=9606 GN=VN1R5 PE=2 SV=2	2	4	1	regulation of biological process;response to stimulus	membrane	receptor activity;signal transducer activity	VN1R5	1			0.076	0	98682683	7.4918e+06	High	Peak Found
High	P08240	Signal recognition particle receptor subunit alpha OS=Homo sapiens OX=9606 GN=SRPRA PE=1 SV=2	18	8	8	cell organization and biogenesis;transport	endoplasmic reticulum;membrane	catalytic activity;nucleotide binding;RNA binding	SRPR; SRPRA	11	Protein export	XBP1(S) activates chaperone genes; SRP-dependent cotranslational protein targeting to membrane	0.077	54.99	3.67115e+07	889228	High	Peak Found
Medium	Q9NZP5	Olfactory receptor 5AC2 OS=Homo sapiens OX=9606 GN=OR5AC2 PE=3 SV=2	2	1	1	regulation of biological process;response to stimulus	membrane	receptor activity;signal transducer activity	OR5AC2	3	Olfactory transduction	Olfactory Signaling Pathway; GPCR downstream signalling	0.077	0	10356264	799120	High	Peak Found
High	P35869	Aryl hydrocarbon receptor OS=Homo sapiens OX=9606 GN=AHR PE=1 SV=2	3	2	1	cell death;metabolic process;regulation of biological process;response to stimulus	cytoplasm;cytosol;nucleus	DNA binding;protein binding;receptor activity;signal transducer activity	AHR	7		Aryl hydrocarbon receptor signalling; PPARA activates gene expression; Endogenous sterols; Xenobiotics	0.085	0	352704	30116	High	Peak Found
Medium	Q8IVB5	LIX1-like protein OS=Homo sapiens OX=9606 GN=LIX1L PE=2 SV=1	4	1	1	cell organization and biogenesis	cytoplasm		LIX1L; LOC101060547	1			0.086	0	7.45967e+06	641423	High	Peak Found
High	Q6UX71	Plexin domain-containing protein 2 OS=Homo sapiens OX=9606 GN=PLXDC2 PE=1 SV=1	2	1	1		membrane	protein binding	PLXDC2	10			0.087	0	3.47458e+06	301844	High	Peak Found
High	P81605	Dermcidin OS=Homo sapiens OX=9606 GN=DCD PE=1 SV=2	41	9	5	defense response;metabolic process;response to stimulus	extracellular	catalytic activity;protein binding;RNA binding	DCD	12		Antimicrobial peptides	0.089	19.53	7.07374e+07	1.23252e+06	High	Peak Found
High	P02675	Fibrinogen beta chain OS=Homo sapiens OX=9606 GN=FGB PE=1 SV=2	5	8	4	cell organization and biogenesis;coagulation;defense response;metabolic process;regulation of biological process;response to stimulus;transport	cell surface;cytoplasm;extracellular;membrane;organelle lumen	protein binding;structural molecule activity	FGB	4	Complement and coagulation cascades; Platelet activation	Integrin cell surface interactions; Signaling by BRAF and RAF fusions; MAP2K and MAPK activation; GRB2:SOS provides linkage to MAPK signaling for Integrins ; Signaling by RAS mutants; Signaling by high-kinase activity BRAF mutants; Signaling by moderate kinase activity BRAF mutants; Platelet degranulation ; p130Cas linkage to MAPK signaling for integrins; Paradoxical activation of RAF signaling b…	0.09	606.37	2.35267e+07	6.12233e+06	High	Peak Found
Medium	Q9UNW9	RNA-binding protein Nova-2 OS=Homo sapiens OX=9606 GN=NOVA2 PE=1 SV=1	2	1	1	metabolic process;regulation of biological process	nucleus	RNA binding	NOVA2	19			0.092	0	5365856	492565	High	Peak Found
Low	Q96HG1	Small integral membrane protein 10 OS=Homo sapiens OX=9606 GN=SMIM10 PE=3 SV=4	25	1	1		membrane		CXorf69; SMIM10; LOC100129361; SMIM10L1	X; 12			0.098	0	1.21061e+06	118797	High	Peak Found
High	Q9H4P4	E3 ubiquitin-protein ligase NRDP1 OS=Homo sapiens OX=9606 GN=RNF41 PE=1 SV=2	3	1	1	cell death;metabolic process;regulation of biological process;response to stimulus	cytosol	catalytic activity;metal ion binding;protein binding	RNF41	12	Endocytosis	Antigen processing: Ubiquitination & Proteasome degradation; Downregulation of ERBB2:ERBB3 signaling	0.102	0	8515501	871089	High	Peak Found
Medium	Q96BZ8	Leukocyte receptor cluster member 1 OS=Homo sapiens OX=9606 GN=LENG1 PE=1 SV=1	3	1	1			protein binding	LENG1	19; CHR_HSCHR19LRC_LRC_T_CTG3_1; CHR_HSCHR19LRC_LRC_S_CTG3_1; CHR_HSCHR19_4_CTG3_1; CHR_HSCHR19LRC_PGF1_CTG3_1; CHR_HSCHR19LRC_COX2_CTG3_1; CHR_HSCHR19LRC_PGF2_CTG3_1; CHR_HSCHR19LRC_LRC_J_CTG3_1; CHR_HSCHR19LRC_LRC_I_CTG3_1; CHR_HSCHR19LRC_COX1_CTG3_1			0.103	0	10221626	1055520	High	Peak Found
High	P00734	Prothrombin OS=Homo sapiens OX=9606 GN=F2 PE=1 SV=2	9	12	4	cellular component movement;cellular homeostasis;coagulation;defense response;development;metabolic process;regulation of biological process;response to stimulus;transport	extracellular;membrane;organelle lumen	catalytic activity;metal ion binding;protein binding;receptor activity;signal transducer activity	F2	11	Neuroactive ligand-receptor interaction; Complement and coagulation cascades; Regulation of actin cytoskeleton	Regulation of Insulin-like Growth Factor (IGF) transport and uptake by Insulin-like Growth Factor Binding Proteins (IGFBPs); Peptide ligand-binding receptors; Transport of gamma-carboxylated protein precursors from the endoplasmic reticulum to the Golgi apparatus; Intrinsic Pathway of Fibrin Clot Formation; Removal of aminoterminal propeptides from gamma-carboxylated proteins; Gamma-carboxylation…	0.108	25.04	4.1104e+07	2.81413e+06	High	Peak Found
High	Q9UNW1	Multiple inositol polyphosphate phosphatase 1 OS=Homo sapiens OX=9606 GN=MINPP1 PE=1 SV=1	7	4	3	metabolic process	endoplasmic reticulum;organelle lumen	catalytic activity	MINPP1	10	Inositol phosphate metabolism; Glycolysis / Gluconeogenesis; Metabolic pathways	Synthesis of IPs in the ER lumen	0.112	0	3.12625e+06	282384	High	Peak Found
High	P22455	Fibroblast growth factor receptor 4 OS=Homo sapiens OX=9606 GN=FGFR4 PE=1 SV=2	2	5	1	cellular component movement;metabolic process;regulation of biological process;response to stimulus	cytoplasm;endoplasmic reticulum;endosome;extracellular;Golgi;membrane	catalytic activity;nucleotide binding;protein binding;receptor activity;signal transducer activity	FGFR4	5	Endocytosis; Rap1 signaling pathway; MAPK signaling pathway; Regulation of actin cytoskeleton; Ras signaling pathway; Signaling pathways regulating pluripotency of stem cells; PI3K-Akt signaling pathway	PI3K Cascade; SHC-mediated cascade:FGFR4; PI5P, PP2A and IER3 Regulate PI3K/AKT Signaling; FRS-mediated FGFR4 signaling; FGFR4 mutant receptor activation; Negative regulation of FGFR4 signaling; PI-3K cascade:FGFR4; betaKlotho-mediated ligand binding; Phospholipase C-mediated cascade; FGFR4; Constitutive Signaling by Aberrant PI3K in Cancer; RAF/MAP kinase cascade; Interleukin-20 family signaling	0.112	0	60095660	6.73416e+06	High	Peak Found
High	P04114	Apolipoprotein B-100 OS=Homo sapiens OX=9606 GN=APOB PE=1 SV=2	2	11	8	cell organization and biogenesis;cellular component movement;metabolic process;regulation of biological process;response to stimulus;transport	cytoplasm;cytosol;endoplasmic reticulum;endosome;extracellular;membrane;organelle lumen	protein binding;transporter activity	APOB	2	Fat digestion and absorption; Vitamin digestion and absorption	Post-translational protein phosphorylation; Cargo recognition for clathrin-mediated endocytosis; Regulation of Insulin-like Growth Factor (IGF) transport and uptake by Insulin-like Growth Factor Binding Proteins (IGFBPs); LDL remodeling; Scavenging by Class H Receptors; VLDL clearance; Retinoid metabolism and transport; Chylomicron remodeling; Scavenging by Class A Receptors; LDL clearance; Plate…	0.113	79.19	3.64438e+07	4.97749e+06	High	Peak Found
Low	P17302	Gap junction alpha-1 protein OS=Homo sapiens OX=9606 GN=GJA1 PE=1 SV=2	2	1	1	cell communication;cell death;cell organization and biogenesis;cellular homeostasis;defense response;regulation of biological process;response to stimulus;transport	cytoplasm;endoplasmic reticulum;endosome;Golgi;membrane;mitochondrion;vacuole	protein binding;signal transducer activity;transporter activity	GJA1	6	Arrhythmogenic right ventricular cardiomyopathy (ARVC); Gap junction	Transport of connexins along the secretory pathway; c-src mediated regulation of Cx43 function and closure of gap junctions; Formation of annular gap junctions; Microtubule-dependent trafficking of connexons from Golgi to the plasma membrane; Oligomerization of connexins into connexons	0.114	0	188290800	21423566	High	Peak Found
High	P04264	Keratin, type II cytoskeletal 1 OS=Homo sapiens OX=9606 GN=KRT1 PE=1 SV=6	61	180	48	cell death;defense response;metabolic process;regulation of biological process;response to stimulus;transport	cytoskeleton;cytosol;extracellular;membrane;nucleus	catalytic activity;motor activity;protein binding;receptor activity;structural molecule activity	KRT1	12		Formation of the cornified envelope; Neutrophil degranulation	0.123	137.75	1425307895	9.1563e+07	High	Peak Found
High	O00220	Tumor necrosis factor receptor superfamily member 10A OS=Homo sapiens OX=9606 GN=TNFRSF10A PE=1 SV=3	9	5	4	cell death;cellular component movement;defense response;development;metabolic process;regulation of biological process;response to stimulus	cell surface;membrane	protein binding;receptor activity;signal transducer activity	TNFRSF10A	8	Cytokine-cytokine receptor interaction; Natural killer cell mediated cytotoxicity; Apoptosis; Measles; Influenza A	Dimerization of procaspase-8; TRAIL signaling; Cell surface interactions at the vascular wall; TP53 Regulates Transcription of Death Receptors and Ligands; Regulation by c-FLIP; CASP8 activity is inhibited	0.126	0	3.05465e+06	74856.2	High	Peak Found
Medium	P49638	Alpha-tocopherol transfer protein OS=Homo sapiens OX=9606 GN=TTPA PE=1 SV=1	3	2	1	cellular homeostasis;metabolic process;regulation of biological process;response to stimulus;transport	cytoplasm;cytosol;endosome	protein binding;transporter activity	TTPA	8		Vitamin E	0.129	0	2.14649e+06	276854	High	Peak Found
High	Q02539	Histone H1.1 OS=Homo sapiens OX=9606 GN=HIST1H1A PE=1 SV=3	28	53	2	cell organization and biogenesis;regulation of biological process	cell surface;chromosome;nucleus	DNA binding;protein binding	HIST1H1A	6		Formation of Senescence-Associated Heterochromatin Foci (SAHF); Activation of DNA fragmentation factor	0.13	0	1.62465e+07	1.75236e+06	High	Peak Found
High	Q9BS40	Latexin OS=Homo sapiens OX=9606 GN=LXN PE=1 SV=2	17	5	3	defense response;regulation of biological process;response to stimulus	cytoplasm	enzyme regulator activity;protein binding	LXN	3			0.132	65.01	1.64219e+07	1.95057e+06	High	Peak Found
High	Q7L592	Protein arginine methyltransferase NDUFAF7, mitochondrial OS=Homo sapiens OX=9606 GN=NDUFAF7 PE=1 SV=1	2	1	1	cell organization and biogenesis;metabolic process	mitochondrion;organelle lumen	catalytic activity;protein binding	NDUFAF7	2		Complex I biogenesis	0.134	0	2.79766e+06	375257	High	Peak Found
High	P32004	Neural cell adhesion molecule L1 OS=Homo sapiens OX=9606 GN=L1CAM PE=1 SV=2	15	34	17	cell differentiation;cell organization and biogenesis;cellular component movement;development;regulation of biological process;response to stimulus	cell surface;membrane	protein binding	L1CAM	X	Cell adhesion molecules (CAMs); Axon guidance	Basigin interactions; Signal transduction by L1; Recycling pathway of L1; Interaction between L1 and Ankyrins	0.135	37.85	1.20938e+08	1.24823e+07	High	Peak Found
High	Q8N1N4	Keratin, type II cytoskeletal 78 OS=Homo sapiens OX=9606 GN=KRT78 PE=1 SV=2	4	21	1	cell death	cytosol	structural molecule activity	KRT78	12		Formation of the cornified envelope	0.135	0	5.16762e+06	699816	High	Peak Found
High	Q92930	Ras-related protein Rab-8B OS=Homo sapiens OX=9606 GN=RAB8B PE=1 SV=2	18	12	1	cell organization and biogenesis;regulation of biological process;response to stimulus;transport	endosome;membrane;mitochondrion	catalytic activity;nucleotide binding;protein binding	RAB8B	15		TBC/RABGAPs; RAB GEFs exchange GTP for GDP on RABs; RAB geranylgeranylation	0.146	0	2.87875e+06	419837	High	Peak Found
High	O95297	Myelin protein zero-like protein 1 OS=Homo sapiens OX=9606 GN=MPZL1 PE=1 SV=1	4	1	1	cell communication;regulation of biological process;response to stimulus	cell surface;membrane	protein binding;structural molecule activity	MPZL1	1	Cell adhesion molecules (CAMs)		0.147	0	8696962	1.27905e+06	High	Peak Found
High	P08727	Keratin, type I cytoskeletal 19 OS=Homo sapiens OX=9606 GN=KRT19 PE=1 SV=4	75	142	23	cell death;cell differentiation;cell organization and biogenesis;regulation of biological process;response to stimulus	cytoskeleton;cytosol;membrane	protein binding;structural molecule activity	KRT19	17		Formation of the cornified envelope	0.149	17.61	1.96888e+08	2.89178e+07	High	Peak Found
High	O75054	Immunoglobulin superfamily member 3 OS=Homo sapiens OX=9606 GN=IGSF3 PE=2 SV=3	3	4	4	regulation of biological process;response to stimulus	cell surface;membrane		IGSF3	1			0.155	0	4.21984e+06	92509.3	High	Peak Found
High	P30838	Aldehyde dehydrogenase, dimeric NADP-preferring OS=Homo sapiens OX=9606 GN=ALDH3A1 PE=1 SV=3	32	20	11	metabolic process;regulation of biological process;response to stimulus	cytoplasm;cytosol;endoplasmic reticulum;membrane	catalytic activity;protein binding	ALDH3A1	17	Tyrosine metabolism; Histidine metabolism; beta-Alanine metabolism; Metabolism of xenobiotics by cytochrome P450; Drug metabolism - cytochrome P450; Chemical carcinogenesis; Glycolysis / Gluconeogenesis; Phenylalanine metabolism; Metabolic pathways	Phase I - Functionalization of compounds	0.157	24.87	9.2181e+07	1.45255e+07	High	Peak Found
High	Q8NE01	Metal transporter CNNM3 OS=Homo sapiens OX=9606 GN=CNNM3 PE=1 SV=1	1	1	1	transport	membrane	protein binding	CNNM3	2			0.159	0	436255	69498	High	Peak Found
High	P02533	Keratin, type I cytoskeletal 14 OS=Homo sapiens OX=9606 GN=KRT14 PE=1 SV=4	49	242	4	cell death;cell differentiation;cell organization and biogenesis;response to stimulus	cytoplasm;cytosol;nucleus	protein binding;structural molecule activity	KRT14	17		Formation of the cornified envelope; Type I hemidesmosome assembly	0.161	40.16	1.22152e+08	4.52323e+07	High	Peak Found
Medium	Q92574	Hamartin OS=Homo sapiens OX=9606 GN=TSC1 PE=1 SV=2	1	1	1	cell differentiation;cell organization and biogenesis;cellular component movement;metabolic process;regulation of biological process;response to stimulus;transport	cytoplasm;cytoskeleton;cytosol;membrane;nucleus	catalytic activity;motor activity;protein binding	TSC1	9	Insulin signaling pathway; Phospholipase D signaling pathway; Choline metabolism in cancer; AMPK signaling pathway; mTOR signaling pathway; Longevity regulating pathway; PI3K-Akt signaling pathway	TBC/RABGAPs; Energy dependent regulation of mTOR by LKB1-AMPK; TP53 Regulates Metabolic Genes; Inhibition of TSC complex formation by PKB; Macroautophagy	0.165	0	4696503	776194	High	Peak Found
High	P53985	Monocarboxylate transporter 1 OS=Homo sapiens OX=9606 GN=SLC16A1 PE=1 SV=3	4	4	3	cell organization and biogenesis;cellular component movement;metabolic process;regulation of biological process;response to stimulus;transport	membrane;mitochondrion	protein binding;transporter activity	SLC16A1	1; CHR_HG2104_PATCH		Proton-coupled monocarboxylate transport; Defective SLC16A1 causes symptomatic deficiency in lactate transport (SDLT); Basigin interactions; Pyruvate metabolism	0.168	0	1.05644e+07	800090	High	Peak Found
High	Q16890	Tumor protein D53 OS=Homo sapiens OX=9606 GN=TPD52L1 PE=1 SV=1	18	6	3	regulation of biological process	cytoplasm	protein binding	TPD52L1	6		Golgi Associated Vesicle Biogenesis	0.171	0	1.3197e+07	1.72188e+06	High	Peak Found
High	P02765	Alpha-2-HS-glycoprotein OS=Homo sapiens OX=9606 GN=AHSG PE=1 SV=2	5	5	3								0.181	0	4.92757e+07	3.1903e+06	High	Peak Found
Medium	Q96FM1	Post-GPI attachment to proteins factor 3 OS=Homo sapiens OX=9606 GN=PGAP3 PE=1 SV=2	2	2	1	metabolic process	endoplasmic reticulum;Golgi;membrane	catalytic activity	PGAP3	17			0.186	0	7508683	1.39398e+06	High	Peak Found	Met-loss [N-Term]
High	A0A286YFD6	Uncharacterized protein OS=Homo sapiens OX=9606 PE=4 SV=1	16	5	4								0.188	0	5.67187e+06	4984169	High	Peak Found
Low	Q14145	Kelch-like ECH-associated protein 1 OS=Homo sapiens OX=9606 GN=KEAP1 PE=1 SV=2	2	1	1	metabolic process;regulation of biological process;response to stimulus	cytoplasm;cytosol;endoplasmic reticulum;nucleus	catalytic activity;protein binding	KEAP1	19	Ubiquitin mediated proteolysis	Ub-specific processing proteases; Antigen processing: Ubiquitination & Proteasome degradation; Neddylation	0.196	0	8.21551e+06	1.60863e+06	High	Peak Found
High	Q9H9B4	Sideroflexin-1 OS=Homo sapiens OX=9606 GN=SFXN1 PE=1 SV=4	57	39	15	cell differentiation;transport	membrane;mitochondrion	transporter activity	SFXN1	5			0.203	27.69	1.79202e+08	3.61429e+07	High	Peak Found
High	P19012	Keratin, type I cytoskeletal 15 OS=Homo sapiens OX=9606 GN=KRT15 PE=1 SV=3	13	72	1	cell death;cell organization and biogenesis	cytosol;nucleus	protein binding;structural molecule activity	KRT15	17		Formation of the cornified envelope	0.203	0	16205294	3.28927e+06	High	Peak Found
High	P31641	Sodium- and chloride-dependent taurine transporter OS=Homo sapiens OX=9606 GN=SLC6A6 PE=1 SV=2	5	4	2	metabolic process;transport	membrane	transporter activity	SLC6A6	3		Amino acid transport across the plasma membrane; Na+/Cl- dependent neurotransmitter transporters	0.203	0	1.72423e+07	3507593	High	Peak Found
High	Q9NPD8	Ubiquitin-conjugating enzyme E2 T OS=Homo sapiens OX=9606 GN=UBE2T PE=1 SV=1	16	3	3	metabolic process;response to stimulus	cytoplasm;nucleus	catalytic activity;nucleotide binding;protein binding	UBE2T	1	Fanconi anemia pathway	Synthesis of active ubiquitin: roles of E1 and E2 enzymes; Fanconi Anemia Pathway	0.204	0	5.63137e+06	697408	High	Peak Found
High	Q16594	Transcription initiation factor TFIID subunit 9 OS=Homo sapiens OX=9606 GN=TAF9 PE=1 SV=1	17	3	3	cell organization and biogenesis;metabolic process;regulation of biological process;response to stimulus	nucleus	catalytic activity;DNA binding;protein binding	TAF9	5; CHR_HSCHR5_2_CTG1_1	Basal transcription factors	RNA polymerase II transcribes snRNA genes; RNA Polymerase II Transcription Initiation; HIV Transcription Initiation; RNA Polymerase II Transcription Pre-Initiation And Promoter Opening; HATs acetylate histones; RNA Polymerase II HIV Promoter Escape; Regulation of TP53 Activity through Phosphorylation; RNA Polymerase II Pre-transcription Events; RNA Polymerase II Promoter Escape	0.206	120.08	4.50777e+06	1.59403e+06	High	Peak Found
High	Q14643	Inositol 1,4,5-trisphosphate receptor type 1 OS=Homo sapiens OX=9606 GN=ITPR1 PE=1 SV=3	3	15	5	cell death;cellular homeostasis;regulation of biological process;response to stimulus;transport	cytoplasm;endoplasmic reticulum;membrane	metal ion binding;protein binding;receptor activity;signal transducer activity;transporter activity	ITPR1	3	Dopaminergic synapse; Serotonergic synapse; NOD-like receptor signaling pathway; Vascular smooth muscle contraction; Glutamatergic synapse; cGMP-PKG signaling pathway; Renin secretion; Huntington's disease; Oxytocin signaling pathway; Circadian entrainment; Long-term potentiation; Gap junction; Phosphatidylinositol signaling system; Glucagon signaling pathway; Thyroid hormone synthesis; Pancreati…	Ion homeostasis; FCERI mediated Ca+2 mobilization; PLC beta mediated events; Ca2+ pathway; cGMP effects; DAG and IP3 signaling; Glucagon-like Peptide-1 (GLP1) regulates insulin secretion; Elevation of cytosolic Ca2+ levels; Effects of PIP2 hydrolysis; Gastrin-CREB signalling pathway via PKC and MAPK; VEGFR2 mediated cell proliferation; CLEC7A (Dectin-1) induces NFAT activation; Antigen activates …	0.214	120.88	7.50843e+07	8.3165e+06	High	Peak Found
High	Q6P1K2	Polyamine-modulated factor 1 OS=Homo sapiens OX=9606 GN=PMF1 PE=1 SV=2	6	2	1	cell division;cell organization and biogenesis;metabolic process;regulation of biological process	chromosome;cytosol;Golgi;nucleus	protein binding	PMF1; PMF1-BGLAP	1		Amplification of signal from unattached kinetochores via a MAD2 inhibitory signal; Separation of Sister Chromatids; Resolution of Sister Chromatid Cohesion; RHO GTPases Activate Formins	0.216	0	597422	128791	High	Peak Found
High	Q5XPI4	E3 ubiquitin-protein ligase RNF123 OS=Homo sapiens OX=9606 GN=RNF123 PE=1 SV=1	2	4	3	metabolic process	cytoplasm;cytosol	catalytic activity;metal ion binding;protein binding	RNF123	3		Ub-specific processing proteases; Antigen processing: Ubiquitination & Proteasome degradation	0.218	108.98	3.72729e+07	2.76343e+07	High	Peak Found
High	Q9BQG2	Peroxisomal NADH pyrophosphatase NUDT12 OS=Homo sapiens OX=9606 GN=NUDT12 PE=1 SV=1	3	1	1	metabolic process	cytoplasm;nucleus;organelle lumen	catalytic activity;metal ion binding;protein binding	NUDT12	5	Peroxisome; Nicotinate and nicotinamide metabolism; Metabolic pathways	Nicotinamide salvaging	0.219	0	4011045	878488	High	Peak Found
High	Q9UM22	Mammalian ependymin-related protein 1 OS=Homo sapiens OX=9606 GN=EPDR1 PE=1 SV=2	4	2	1		extracellular;vacuole	metal ion binding	EPDR1	7			0.22	0	3.95854e+06	870476	High	Peak Found
High	Q9Y3B6	ER membrane protein complex subunit 9 OS=Homo sapiens OX=9606 GN=EMC9 PE=1 SV=3	6	1	1		cytoplasm	protein binding	EMC9	14			0.22	0	433248	95189.3	High	Peak Found
High	Q05D32	CTD small phosphatase-like protein 2 OS=Homo sapiens OX=9606 GN=CTDSPL2 PE=1 SV=2	3	2	1	metabolic process;regulation of biological process	nucleus	catalytic activity;receptor activity;signal transducer activity	CTDSPL2	15			0.221	0	1.68697e+06	373514	High	Peak Found
High	Q9NW15	Anoctamin-10 OS=Homo sapiens OX=9606 GN=ANO10 PE=1 SV=2	3	2	2	transport	membrane	transporter activity	ANO10	3		Stimuli-sensing channels	0.221	0	3.7716e+06	237729	High	Peak Found
High	Q9UM47	Neurogenic locus notch homolog protein 3 OS=Homo sapiens OX=9606 GN=NOTCH3 PE=1 SV=2	1	3	2	cell differentiation;development;metabolic process;regulation of biological process;response to stimulus	cytoskeleton;cytosol;extracellular;membrane;nucleus	metal ion binding;protein binding;receptor activity	NOTCH3	19	Th1 and Th2 cell differentiation; Dorso-ventral axis formation; MicroRNAs in cancer; Breast cancer; Thyroid hormone signaling pathway; Notch signaling pathway; Endocrine resistance	Defective LFNG causes SCDO3; Pre-NOTCH Processing in Golgi; Notch-HLH transcription pathway; Pre-NOTCH Transcription and Translation; Signaling by NOTCH3; Pre-NOTCH Processing in the Endoplasmic Reticulum	0.222	104.24	3.34968e+06	1.37216e+06	High	Peak Found
High	Q8N0U8	Vitamin K epoxide reductase complex subunit 1-like protein 1 OS=Homo sapiens OX=9606 GN=VKORC1L1 PE=1 SV=2	10	2	2	metabolic process;response to stimulus	endoplasmic reticulum;membrane	catalytic activity	VKORC1L1	7	Ubiquinone and other terpenoid-quinone biosynthesis	Metabolism of vitamin K	0.222	3.28	1.07909e+07	2.35368e+06	High	Peak Found	Met-loss [N-Term]
High	Q96S52	GPI transamidase component PIG-S OS=Homo sapiens OX=9606 GN=PIGS PE=1 SV=3	10	5	3	metabolic process	endoplasmic reticulum;membrane	catalytic activity;protein binding	PIGS	17	Metabolic pathways; Glycosylphosphatidylinositol (GPI)-anchor biosynthesis	Attachment of GPI anchor to uPAR	0.223	41.6	2.70608e+06	598911	High	Peak Found
High	Q9BXW9	Fanconi anemia group D2 protein OS=Homo sapiens OX=9606 GN=FANCD2 PE=1 SV=2	3	6	5	cell organization and biogenesis;metabolic process;regulation of biological process;response to stimulus	chromosome;cytosol;nucleus	protein binding	FANCD2	3	Fanconi anemia pathway	Fanconi Anemia Pathway; TP53 Regulates Transcription of DNA Repair Genes	0.228	12.6	7.74016e+06	1.35619e+06	High	Peak Found
High	P29375	Lysine-specific demethylase 5A OS=Homo sapiens OX=9606 GN=KDM5A PE=1 SV=3	1	2	1	cell organization and biogenesis;development;metabolic process;regulation of biological process	nucleus	catalytic activity;DNA binding;metal ion binding;protein binding	KDM5A	12		HDMs demethylate histones	0.229	0	657455	150598	High	Peak Found
High	Q16763	Ubiquitin-conjugating enzyme E2 S OS=Homo sapiens OX=9606 GN=UBE2S PE=1 SV=2	5	2	1	cell division;cell organization and biogenesis;metabolic process	cytoplasm;cytosol	catalytic activity;nucleotide binding;protein binding	UBE2S	19	Ubiquitin mediated proteolysis	Synthesis of active ubiquitin: roles of E1 and E2 enzymes; Antigen processing: Ubiquitination & Proteasome degradation	0.23	0	1.92088e+06	441409	High	Peak Found
High	P31327	Carbamoyl-phosphate synthase [ammonia], mitochondrial OS=Homo sapiens OX=9606 GN=CPS1 PE=1 SV=2	53	171	70	cell differentiation;metabolic process;response to stimulus	cytoplasm;membrane;mitochondrion;nucleus;organelle lumen	catalytic activity;metal ion binding;nucleotide binding;protein binding	CPS1	2	Arginine biosynthesis; Carbon metabolism; Alanine, aspartate and glutamate metabolism; Biosynthesis of amino acids; Nitrogen metabolism; Metabolic pathways	Urea cycle	0.231	21.65	6.72381e+08	1.62324e+08	High	Peak Found
High	P00374	Dihydrofolate reductase OS=Homo sapiens OX=9606 GN=DHFR PE=1 SV=2	65	22	12	cell organization and biogenesis;metabolic process;regulation of biological process;response to stimulus	cytoplasm;cytosol;mitochondrion	catalytic activity;nucleotide binding;protein binding;RNA binding;translation regulator activity	DHFR; DHFRP1	5; 18	Folate biosynthesis; Antifolate resistance; One carbon pool by folate; Metabolic pathways	Activation of E2F1 target genes at G1/S; Metabolism of folate and pterines; eNOS activation and regulation; Tetrahydrobiopterin (BH4) synthesis, recycling, salvage and regulation	0.232	41.68	8.51712e+07	2.04996e+07	High	Peak Found	Met-loss [N-Term]
High	P12259	Coagulation factor V OS=Homo sapiens OX=9606 GN=F5 PE=1 SV=4	5	16	10	cell organization and biogenesis;coagulation;metabolic process;response to stimulus;transport	endoplasmic reticulum;extracellular;Golgi;membrane;organelle lumen	metal ion binding;protein binding	F5	1	Complement and coagulation cascades	Platelet degranulation ; Post-translational protein phosphorylation; Regulation of Insulin-like Growth Factor (IGF) transport and uptake by Insulin-like Growth Factor Binding Proteins (IGFBPs); Common Pathway of Fibrin Clot Formation; Cargo concentration in the ER; COPII (Coat Protein 2) Mediated Vesicle Transport	0.233	139.51	8.16704e+07	4083934	High	Peak Found
High	Q9Y6N7	Roundabout homolog 1 OS=Homo sapiens OX=9606 GN=ROBO1 PE=1 SV=1	3	5	5	cell differentiation;cellular component movement;development;metabolic process;regulation of biological process;response to stimulus	cell surface;cytoplasm;membrane	protein binding;receptor activity;signal transducer activity	ROBO1	3	Axon guidance	Netrin-1 signaling; SLIT2:ROBO1 increases RHOA activity; Activation of RAC1; Regulation of expression of SLITs and ROBOs; Regulation of commissural axon pathfinding by SLIT and ROBO; Inactivation of CDC42 and RAC1; Regulation of cortical dendrite branching; Role of ABL in ROBO-SLIT signaling	0.234	28.79	3.54203e+07	1.152e+06	High	Peak Found
High	Q8NBT2	Kinetochore protein Spc24 OS=Homo sapiens OX=9606 GN=SPC24 PE=1 SV=2	14	2	2	cell division;cell organization and biogenesis	chromosome;cytosol;nucleus	protein binding	SPC24	19		Amplification of signal from unattached kinetochores via a MAD2 inhibitory signal; Separation of Sister Chromatids; Resolution of Sister Chromatid Cohesion; RHO GTPases Activate Formins	0.238	0	2.03918e+06	484761	High	Peak Found
High	Q03013	Glutathione S-transferase Mu 4 OS=Homo sapiens OX=9606 GN=GSTM4 PE=1 SV=3	37	27	2	metabolic process	cytoplasm;cytosol	catalytic activity;protein binding	GSTM4	1	Glutathione metabolism; Metabolism of xenobiotics by cytochrome P450; Drug metabolism - cytochrome P450; Chemical carcinogenesis; Platinum drug resistance	Glutathione conjugation	0.239	0	9.17681e+06	1.6194e+06	High	Peak Found
High	Q9Y6M7	Sodium bicarbonate cotransporter 3 OS=Homo sapiens OX=9606 GN=SLC4A7 PE=1 SV=2	5	7	5	cellular homeostasis;transport	membrane	transporter activity	SLC4A7	3		Bicarbonate transporters	0.239	4.71	1.76569e+07	2.25282e+06	High	Peak Found
High	Q92791	Endoplasmic reticulum protein SC65 OS=Homo sapiens OX=9606 GN=P3H4 PE=1 SV=1	12	6	4	cell organization and biogenesis;metabolic process	chromosome;endoplasmic reticulum	protein binding	LEPREL4; P3H4	17			0.239	34.04	1.66106e+07	3.54824e+06	High	Peak Found
High	Q2TAL8	Glutamine-rich protein 1 OS=Homo sapiens OX=9606 GN=QRICH1 PE=1 SV=1	8	5	4	cell organization and biogenesis;development;regulation of biological process	cytoplasm	DNA binding;protein binding	QRICH1	3			0.243	48.7	1.13427e+07	2.55405e+06	High	Peak Found
High	Q05639	Elongation factor 1-alpha 2 OS=Homo sapiens OX=9606 GN=EEF1A2 PE=1 SV=1	64	345	13	metabolic process;regulation of biological process;response to stimulus	cytoplasm;nucleus	catalytic activity;nucleotide binding;protein binding;RNA binding	EEF1A2	20	RNA transport; Legionellosis	Eukaryotic Translation Elongation	0.246	20.18	3.01166e+08	7.60441e+07	High	Peak Found
High	Q9BRT9	DNA replication complex GINS protein SLD5 OS=Homo sapiens OX=9606 GN=GINS4 PE=1 SV=1	18	3	3	cell proliferation;metabolic process;response to stimulus	cytoplasm;nucleus	catalytic activity;protein binding	GINS4	8		Unwinding of DNA	0.247	25.88	5.80261e+06	910740	High	Peak Found
High	Q92817	Envoplakin OS=Homo sapiens OX=9606 GN=EVPL PE=1 SV=3	1	3	2	cell death;cell differentiation;metabolic process	cytoplasm;cytoskeleton;cytosol	protein binding;structural molecule activity	EVPL	17		Formation of the cornified envelope	0.247	0	417293	102922	High	Peak Found
High	Q08499	cAMP-specific 3',5'-cyclic phosphodiesterase 4D OS=Homo sapiens OX=9606 GN=PDE4D PE=1 SV=2	9	6	6	cellular component movement;metabolic process;regulation of biological process;response to stimulus	cytoplasm;cytoskeleton;cytosol;membrane	catalytic activity;metal ion binding;nucleotide binding;protein binding	PDE4D	5	Purine metabolism; Morphine addiction; cAMP signaling pathway	G alpha (s) signalling events; DARPP-32 events	0.25	16.98	7.46203e+06	1.27481e+06	High	Peak Found
High	O15056	Synaptojanin-2 OS=Homo sapiens OX=9606 GN=SYNJ2 PE=1 SV=3	2	4	3	cell organization and biogenesis;metabolic process	cytoplasm;cytoskeleton;cytosol;membrane	catalytic activity;protein binding;RNA binding	SYNJ2	6	Phosphatidylinositol signaling system; Inositol phosphate metabolism; Metabolic pathways	Synthesis of PIPs at the plasma membrane; Clathrin-mediated endocytosis	0.257	0	5.78163e+06	325143	High	Peak Found
High	H3BRN7	Uncharacterized protein OS=Homo sapiens OX=9606 PE=4 SV=1	23	1	1					15			0.261	0	3168989	826512	High	Peak Found
High	O94875	Sorbin and SH3 domain-containing protein 2 OS=Homo sapiens OX=9606 GN=SORBS2 PE=1 SV=3	7	9	6	cell growth;cell organization and biogenesis;cellular component movement	cytoplasm;cytoskeleton;membrane;nucleus	protein binding;RNA binding;structural molecule activity	SORBS2	4			0.263	7.85	2.04836e+07	3.25569e+06	High	Peak Found
High	Q9NYJ1	Cytochrome c oxidase assembly factor 4 homolog, mitochondrial OS=Homo sapiens OX=9606 GN=COA4 PE=1 SV=2	10	2	1	cell organization and biogenesis	mitochondrion		COA4	11		Mitochondrial protein import; Metabolism of proteins	0.264	0	425930	112386	High	Peak Found
High	P52569	Cationic amino acid transporter 2 OS=Homo sapiens OX=9606 GN=SLC7A2 PE=1 SV=2	3	3	2	metabolic process;regulation of biological process;transport	membrane	transporter activity	SLC7A2	8		Amino acid transport across the plasma membrane	0.265	5.15	9.47124e+06	2.48312e+06	High	Peak Found
Medium	P19484	Transcription factor EB OS=Homo sapiens OX=9606 GN=TFEB PE=1 SV=3	2	2	1	cell organization and biogenesis;metabolic process;regulation of biological process;response to stimulus	cytoplasm;nucleus	DNA binding;protein binding	TFEB	6			0.266	0	746093	198533	High	Peak Found
Low	Q5BJE1	Coiled-coil domain-containing protein 178 OS=Homo sapiens OX=9606 GN=CCDC178 PE=2 SV=3	1	1	1				CCDC178	18			0.266	0	5.41043e+06	1.43689e+06	High	Peak Found
High	Q9UMX5	Neudesin OS=Homo sapiens OX=9606 GN=NENF PE=1 SV=1	42	9	5	regulation of biological process	extracellular;membrane	metal ion binding;protein binding	NENF	1			0.268	2.01	2.00575e+07	4.98435e+06	High	Peak Found
High	P35251	Replication factor C subunit 1 OS=Homo sapiens OX=9606 GN=RFC1 PE=1 SV=4	8	13	10	cell organization and biogenesis;cellular homeostasis;metabolic process;regulation of biological process;response to stimulus	cytoplasm;nucleus	catalytic activity;DNA binding;enzyme regulator activity;nucleotide binding;protein binding	RFC1	4	DNA replication; Mismatch repair; Nucleotide excision repair	Translesion synthesis by POLK; Translesion Synthesis by POLH; Gap-filling DNA repair synthesis and ligation in TC-NER; HDR through Homologous Recombination (HRR); Gap-filling DNA repair synthesis and ligation in GG-NER; Dual Incision in GG-NER; Polymerase switching; Termination of translesion DNA synthesis; Translesion synthesis by POLI; Recognition of DNA damage by PCNA-containing replication co…	0.269	13.53	21512086	8.04153e+06	High	Peak Found
High	Q9NV31	U3 small nucleolar ribonucleoprotein protein IMP3 OS=Homo sapiens OX=9606 GN=IMP3 PE=1 SV=1	13	5	2	metabolic process;regulation of biological process	nucleus	protein binding;RNA binding;structural molecule activity	IMP3	15	Ribosome biogenesis in eukaryotes	Major pathway of rRNA processing in the nucleolus and cytosol; rRNA modification in the nucleus and cytosol	0.269	97.12	1.10375e+07	2.08717e+06	High	Peak Found
High	Q9NRP0	Oligosaccharyltransferase complex subunit OSTC OS=Homo sapiens OX=9606 GN=OSTC PE=1 SV=1	8	3	1	metabolic process	endoplasmic reticulum;membrane	catalytic activity;protein binding	OSTC	4			0.269	0	7.04637e+06	1.89581e+06	High	Peak Found
High	Q12962	Transcription initiation factor TFIID subunit 10 OS=Homo sapiens OX=9606 GN=TAF10 PE=1 SV=1	7	2	2	cell death;cell differentiation;cell organization and biogenesis;metabolic process;regulation of biological process	cytoplasm;nucleus	catalytic activity;DNA binding;protein binding	TAF10	11	Basal transcription factors; Herpes simplex infection	Ub-specific processing proteases; RNA Polymerase II Transcription Pre-Initiation And Promoter Opening; HATs acetylate histones; RNA Polymerase II Promoter Escape; RNA Polymerase II Transcription Initiation; HIV Transcription Initiation; RNA Polymerase II Pre-transcription Events; Regulation of TP53 Activity through Phosphorylation; RNA Polymerase II HIV Promoter Escape	0.269	132.89	5.47771e+06	1.56387e+06	High	Peak Found
High	Q9Y5J1	U3 small nucleolar RNA-associated protein 18 homolog OS=Homo sapiens OX=9606 GN=UTP18 PE=1 SV=3	15	9	6	metabolic process	membrane;nucleus	protein binding;RNA binding	UTP18	17	Ribosome biogenesis in eukaryotes	Major pathway of rRNA processing in the nucleolus and cytosol; rRNA modification in the nucleus and cytosol	0.27	1.53	1.30761e+07	3.50941e+06	High	Peak Found
High	P55145	Mesencephalic astrocyte-derived neurotrophic factor OS=Homo sapiens OX=9606 GN=MANF PE=1 SV=3	55	28	14	cell differentiation;cell organization and biogenesis;regulation of biological process;response to stimulus;transport	cytosol;endoplasmic reticulum;extracellular;nucleus	protein binding;RNA binding	MANF	3		Platelet degranulation	0.271	17.5	1.55333e+08	3.48786e+07	High	Peak Found
Medium	Q96S15	GATOR complex protein WDR24 OS=Homo sapiens OX=9606 GN=WDR24 PE=1 SV=1	1	2	1	cell communication;metabolic process;regulation of biological process;response to stimulus	membrane;vacuole	protein binding	WDR24	16	mTOR signaling pathway		0.271	0	969641	263031	High	Peak Found
High	Q12882	Dihydropyrimidine dehydrogenase [NADP(+)] OS=Homo sapiens OX=9606 GN=DPYD PE=1 SV=2	7	5	5	metabolic process	cytoplasm;cytosol	catalytic activity;metal ion binding;nucleotide binding;protein binding	DPYD	1	beta-Alanine metabolism; Pantothenate and CoA biosynthesis; Metabolic pathways; Pyrimidine metabolism; Drug metabolism - other enzymes	Pyrimidine catabolism	0.276	8.42	1.99361e+06	1.23618e+06	High	Peak Found
High	Q13085	Acetyl-CoA carboxylase 1 OS=Homo sapiens OX=9606 GN=ACACA PE=1 SV=2	11	23	19	cell organization and biogenesis;metabolic process;regulation of biological process;response to stimulus;transport	cytoplasm;cytoskeleton;cytosol;mitochondrion	catalytic activity;metal ion binding;nucleotide binding;protein binding	ACACA	17; CHR_HSCHR17_7_CTG4	Propanoate metabolism; Insulin signaling pathway; Pyruvate metabolism; Fatty acid biosynthesis; Glucagon signaling pathway; AMPK signaling pathway; Metabolic pathways; Fatty acid metabolism	Fatty acyl-CoA biosynthesis; Import of palmitoyl-CoA into the mitochondrial matrix; Activation of gene expression by SREBF (SREBP); Defective HLCS causes multiple carboxylase deficiency; ChREBP activates metabolic gene expression; Biotin transport and metabolism	0.277	10.05	5.50565e+07	1.43927e+07	High	Peak Found
High	P51857	3-oxo-5-beta-steroid 4-dehydrogenase OS=Homo sapiens OX=9606 GN=AKR1D1 PE=1 SV=1	6	4	1	metabolic process	cytoplasm;cytosol	catalytic activity	AKR1D1	7	Metabolic pathways; Steroid hormone biosynthesis; Primary bile acid biosynthesis	Synthesis of bile acids and bile salts via 27-hydroxycholesterol; Synthesis of bile acids and bile salts via 7alpha-hydroxycholesterol; Synthesis of bile acids and bile salts via 24-hydroxycholesterol	0.279	0	258760	72122.8	High	Peak Found	Met-loss [N-Term]
High	Q99661	Kinesin-like protein KIF2C OS=Homo sapiens OX=9606 GN=KIF2C PE=1 SV=2	12	13	3	cell division;cell organization and biogenesis;cell proliferation;cellular component movement;regulation of biological process;transport	chromosome;cytoplasm;cytoskeleton;cytosol;membrane;nucleus	catalytic activity;DNA binding;motor activity;nucleotide binding;protein binding	KIF2C	1		COPI-dependent Golgi-to-ER retrograde traffic; Kinesins; Amplification of signal from unattached kinetochores via a MAD2 inhibitory signal; Separation of Sister Chromatids; Resolution of Sister Chromatid Cohesion; RHO GTPases Activate Formins; MHC class II antigen presentation	0.28	1.87	7.96352e+06	1.79357e+06	High	Peak Found
High	P16949	Stathmin OS=Homo sapiens OX=9606 GN=STMN1 PE=1 SV=3	76	82	22	cell differentiation;cell organization and biogenesis;development;regulation of biological process;response to stimulus	cytoplasm;cytoskeleton;cytosol;membrane	protein binding;signal transducer activity	STMN1	1	MicroRNAs in cancer; MAPK signaling pathway		0.281	15.63	1124629465	3.17967e+08	High	Peak Found
High	P10909	Clusterin OS=Homo sapiens OX=9606 GN=CLU PE=1 SV=1	2	1	1	cell death;cell organization and biogenesis;cell proliferation;defense response;metabolic process;regulation of biological process;response to stimulus;transport	cell surface;cytoplasm;cytosol;endoplasmic reticulum;extracellular;Golgi;membrane;mitochondrion;nucleus;organelle lumen	catalytic activity;protein binding	CLU	8	Complement and coagulation cascades	Platelet degranulation ; Terminal pathway of complement; Antimicrobial peptides; Regulation of Complement cascade	0.281	0	1.55723e+06	437125	High	Peak Found
High	Q5HYI7	Metaxin-3 OS=Homo sapiens OX=9606 GN=MTX3 PE=1 SV=2	7	2	2	transport	membrane;mitochondrion		MTX3	5			0.282	0	3.50998e+06	679677	High	Peak Found
Medium	B3EWG6	Protein FAM25G OS=Homo sapiens OX=9606 GN=FAM25G PE=3 SV=1	8	1	1				FAM25C; FAM25A; FAM25B; FAM25BP; FAM25G	10			0.282	0	19540366	5.50928e+06	High	Peak Found	Met-loss [N-Term]
High	P15924	Desmoplakin OS=Homo sapiens OX=9606 GN=DSP PE=1 SV=3	3	11	9	cell death;cell differentiation;cell organization and biogenesis;metabolic process;regulation of biological process;response to stimulus;transport	cytoplasm;cytoskeleton;membrane;nucleus	catalytic activity;motor activity;protein binding;RNA binding;structural molecule activity	DSP	6	Arrhythmogenic right ventricular cardiomyopathy (ARVC)	Apoptotic cleavage of cell adhesion proteins; Formation of the cornified envelope; Neutrophil degranulation	0.283	0.43	1.21096e+07	3.11633e+06	High	Peak Found
High	Q13232	Nucleoside diphosphate kinase 3 OS=Homo sapiens OX=9606 GN=NME3 PE=1 SV=2	28	7	4	cell death;metabolic process;regulation of biological process	cytosol;mitochondrion	catalytic activity;metal ion binding;nucleotide binding;protein binding	NME3	16	Purine metabolism; Metabolic pathways; Pyrimidine metabolism	Interconversion of nucleotide di- and triphosphates	0.283	36.27	7.30101e+06	3.42232e+06	High	Peak Found
High	P40189	Interleukin-6 receptor subunit beta OS=Homo sapiens OX=9606 GN=IL6ST PE=1 SV=2	4	2	2	metabolic process;regulation of biological process;response to stimulus	extracellular;membrane	protein binding;receptor activity;signal transducer activity	IL6ST	5	Viral carcinogenesis; Cytokine-cytokine receptor interaction; Jak-STAT signaling pathway; Signaling pathways regulating pluripotency of stem cells	IL-6-type cytokine receptor ligand interactions; MAPK3 (ERK1) activation; Interleukin-35 Signalling; MAPK1 (ERK2) activation; Interleukin-20 family signaling	0.284	0	4.10832e+06	953091	High	Peak Found
High	O94905	Erlin-2 OS=Homo sapiens OX=9606 GN=ERLIN2 PE=1 SV=1	47	27	10	metabolic process;regulation of biological process;response to stimulus;transport	cytosol;endoplasmic reticulum;membrane	catalytic activity;protein binding	ERLIN2	8		ABC-family proteins mediated transport; Defective CFTR causes cystic fibrosis; Signaling by plasma membrane FGFR1 fusions	0.285	34.89	8.78644e+07	2.91745e+07	High	Peak Found
High	O43805	Sjoegren syndrome nuclear autoantigen 1 OS=Homo sapiens OX=9606 GN=SSNA1 PE=1 SV=2	26	4	3	cell organization and biogenesis;cellular component movement;metabolic process;regulation of biological process;transport	cytoplasm;cytoskeleton;cytosol;nucleus	protein binding	SSNA1	9		Regulation of PLK1 Activity at G2/M Transition; AURKA Activation by TPX2; Anchoring of the basal body to the plasma membrane; Recruitment of NuMA to mitotic centrosomes; Loss of Nlp from mitotic centrosomes; Recruitment of mitotic centrosome proteins and complexes	0.285	47.09	6.56917e+06	1.36687e+06	High	Peak Found
High	P54132	Bloom syndrome protein OS=Homo sapiens OX=9606 GN=BLM PE=1 SV=1	1	4	1	cell organization and biogenesis;metabolic process;regulation of biological process;response to stimulus	chromosome;cytoplasm;cytosol;nucleus	catalytic activity;DNA binding;metal ion binding;nucleotide binding;protein binding	BLM	15	Homologous recombination; Fanconi anemia pathway	G2/M DNA damage checkpoint; Presynaptic phase of homologous DNA pairing and strand exchange; Resolution of D-loop Structures through Synthesis-Dependent Strand Annealing (SDSA); Meiotic recombination; Processing of DNA double-strand break ends; HDR through Single Strand Annealing (SSA); Regulation of TP53 Activity through Phosphorylation; SUMOylation of DNA damage response and repair proteins; Re…	0.285	0	321121	91657.3	High	Peak Found
High	Q6ZSJ8	Uncharacterized protein C1orf122 OS=Homo sapiens OX=9606 GN=C1orf122 PE=4 SV=2	20	3	2				C1orf122	1			0.286	0	1.70421e+06	375609	High	Peak Found
Medium	P04920	Anion exchange protein 2 OS=Homo sapiens OX=9606 GN=SLC4A2 PE=1 SV=4	1	1	1	cellular homeostasis;transport	membrane	protein binding;transporter activity	SLC4A2	7	Bile secretion; Pancreatic secretion; Gastric acid secretion; Salivary secretion	Bicarbonate transporters	0.286	0	1.56507e+06	447546	High	Peak Found
High	Q53EL6	Programmed cell death protein 4 OS=Homo sapiens OX=9606 GN=PDCD4 PE=1 SV=2	24	10	8	cell death;cell organization and biogenesis;regulation of biological process;response to stimulus	cytoplasm;cytosol;nucleus	protein binding;RNA binding	PDCD4	10	MicroRNAs in cancer; Proteoglycans in cancer	Gene and protein expression by JAK-STAT signaling after Interleukin-12 stimulation; Interleukin-12 family signaling	0.288	55.14	1.74381e+07	4.96939e+06	High	Peak Found
High	Q14118	Dystroglycan OS=Homo sapiens OX=9606 GN=DAG1 PE=1 SV=2	7	9	5	cell differentiation;cell organization and biogenesis;cellular component movement;metabolic process;regulation of biological process;response to stimulus;transport	cytoplasm;cytoskeleton;cytosol;extracellular;membrane;nucleus;organelle lumen	metal ion binding;protein binding;receptor activity;structural molecule activity	DAG1	3	Arrhythmogenic right ventricular cardiomyopathy (ARVC); Dilated cardiomyopathy; ECM-receptor interaction; Viral myocarditis; Hypertrophic cardiomyopathy (HCM)	ECM proteoglycans; Integrin cell surface interactions; Defective POMT1 causes MDDGA1, MDDGB1 and MDDGC1; Defective POMGNT1 causes MDDGA3, MDDGB3 and MDDGC3; Defective POMT2 causes MDDGA2, MDDGB2 and MDDGC2; Regulation of expression of SLITs and ROBOs; O-linked glycosylation; Non-integrin membrane-ECM interactions	0.288	29.75	1.09886e+07	4.07146e+06	High	Peak Found
High	Q12933	TNF receptor-associated factor 2 OS=Homo sapiens OX=9606 GN=TRAF2 PE=1 SV=2	8	10	6	cell death;cell organization and biogenesis;metabolic process;regulation of biological process;response to stimulus	cytoplasm;cytosol;membrane	catalytic activity;metal ion binding;protein binding;signal transducer activity	TRAF2	9	Viral carcinogenesis; TNF signaling pathway; NOD-like receptor signaling pathway; Osteoclast differentiation; Epstein-Barr virus infection; MAPK signaling pathway; Pathways in cancer; Protein processing in endoplasmic reticulum; NF-kappa B signaling pathway; Apoptosis; Non-alcoholic fatty liver disease (NAFLD); Sphingolipid signaling pathway; Small cell lung cancer; Herpes simplex infection; Hepa…	Ub-specific processing proteases; TRAF6 mediated NF-kB activation; TNFR1-induced proapoptotic signaling; TRAF6 mediated IRF7 activation; TNF receptor superfamily (TNFSF) members mediating non-canonical NF-kB pathway; TNFR1-induced NFkappaB signaling pathway; Dimerization of procaspase-8; Regulation of TNFR1 signaling; Regulation by c-FLIP; CASP8 activity is inhibited	0.29	5.14	9.13107e+06	1.65565e+06	High	Peak Found
High	P33316	Deoxyuridine 5'-triphosphate nucleotidohydrolase, mitochondrial OS=Homo sapiens OX=9606 GN=DUT PE=1 SV=4	54	41	12	metabolic process	mitochondrion;nucleus	catalytic activity;metal ion binding;protein binding;RNA binding	DUT	15	Metabolic pathways; Pyrimidine metabolism		0.292	18.2	3.9315e+08	1.18116e+08	High	Peak Found
Medium	Q9BVW5	TIMELESS-interacting protein OS=Homo sapiens OX=9606 GN=TIPIN PE=1 SV=2	3	1	1	cell division;metabolic process;regulation of biological process;response to stimulus	cytoplasm;nucleus	DNA binding;protein binding	TIPIN	15		Processing of DNA double-strand break ends	0.292	0	751937	219479	High	Peak Found
High	Q9BQ39	ATP-dependent RNA helicase DDX50 OS=Homo sapiens OX=9606 GN=DDX50 PE=1 SV=1	5	4	1	metabolic process	cytoplasm;membrane;nucleus	catalytic activity;DNA binding;nucleotide binding;RNA binding	DDX50	10			0.295	0	4045472	1.19369e+06	High	Peak Found
High	Q15293	Reticulocalbin-1 OS=Homo sapiens OX=9606 GN=RCN1 PE=1 SV=1	42	36	14	metabolic process	endoplasmic reticulum;organelle lumen	metal ion binding;protein binding	RCN1	11		Post-translational protein phosphorylation; Regulation of Insulin-like Growth Factor (IGF) transport and uptake by Insulin-like Growth Factor Binding Proteins (IGFBPs)	0.297	35.69	3.08839e+08	9.97334e+07	High	Peak Found
High	P01891	HLA class I histocompatibility antigen, A-68 alpha chain OS=Homo sapiens OX=9606 GN=HLA-A PE=1 SV=4	48	63	13	regulation of biological process;response to stimulus	cell surface;endoplasmic reticulum;Golgi;membrane	protein binding;RNA binding	HLA-A	6		Interferon alpha/beta signaling; ER-Phagosome pathway; Immunoregulatory interactions between a Lymphoid and a non-Lymphoid cell; Endosomal/Vacuolar pathway; Interferon gamma signaling; Antigen Presentation: Folding, assembly and peptide loading of class I MHC	0.298	13.97	5.98455e+08	1.77022e+08	High	Peak Found
High	Q92604	Acyl-CoA:lysophosphatidylglycerol acyltransferase 1 OS=Homo sapiens OX=9606 GN=LPGAT1 PE=1 SV=1	2	1	1	metabolic process;regulation of biological process	cytoplasm;endoplasmic reticulum;membrane	catalytic activity	LPGAT1	1	Glycerophospholipid metabolism	Acyl chain remodelling of PG	0.298	0	1.92484e+06	572995	High	Peak Found
High	P16455	Methylated-DNA--protein-cysteine methyltransferase OS=Homo sapiens OX=9606 GN=MGMT PE=1 SV=1	21	4	4	cell differentiation;metabolic process;regulation of biological process;response to stimulus	membrane;nucleus	catalytic activity;DNA binding;metal ion binding	MGMT	10		MGMT-mediated DNA damage reversal	0.299	0.45	9.31225e+06	2.65325e+06	High	Peak Found
High	Q9BXS9	Solute carrier family 26 member 6 OS=Homo sapiens OX=9606 GN=SLC26A6 PE=1 SV=1	2	2	2	cellular homeostasis;regulation of biological process;response to stimulus;transport	endoplasmic reticulum;membrane	protein binding;transporter activity	SLC26A6	3	Mineral absorption	Multifunctional anion exchangers	0.299	0	2.92348e+06	711959	High	Peak Found	Met-loss [N-Term]
High	P16402	Histone H1.3 OS=Homo sapiens OX=9606 GN=HIST1H1D PE=1 SV=2	58	98	8	cell organization and biogenesis;metabolic process;regulation of biological process	chromosome;nucleus	DNA binding;RNA binding	HIST1H1D	6		Formation of Senescence-Associated Heterochromatin Foci (SAHF); Activation of DNA fragmentation factor	0.3	24.14	1.14587e+08	3.43598e+07	High	Peak Found
High	Q9NS86	LanC-like protein 2 OS=Homo sapiens OX=9606 GN=LANCL2 PE=1 SV=1	6	3	2	regulation of biological process	cytoplasm;cytoskeleton;cytosol;membrane;nucleus	nucleotide binding;protein binding	LANCL2	7			0.3	0	4.0112e+06	858334	High	Peak Found
High	Q8WXD5	Gem-associated protein 6 OS=Homo sapiens OX=9606 GN=GEMIN6 PE=1 SV=1	7	1	1	cell organization and biogenesis;metabolic process;transport	cytoplasm;cytosol;nucleus	protein binding	GEMIN6	2	RNA transport	snRNP Assembly	0.3	0	1.76207e+06	528161	High	Peak Found
High	O95239	Chromosome-associated kinesin KIF4A OS=Homo sapiens OX=9606 GN=KIF4A PE=1 SV=3	11	14	7	cell organization and biogenesis;cellular component movement;metabolic process;transport	chromosome;cytoplasm;cytoskeleton;cytosol;membrane;nucleus	catalytic activity;DNA binding;metal ion binding;motor activity;nucleotide binding;protein binding	KIF4A	X		COPI-dependent Golgi-to-ER retrograde traffic; Kinesins; MHC class II antigen presentation; Recycling pathway of L1	0.305	22.58	2.32501e+07	5.3297e+06	High	Peak Found
High	Q5ZPR3	CD276 antigen OS=Homo sapiens OX=9606 GN=CD276 PE=1 SV=1	13	3	3	cell proliferation;regulation of biological process;response to stimulus	membrane	protein binding	CD276	15	Cell adhesion molecules (CAMs)		0.306	0	2.92014e+06	2.43325e+06	High	Peak Found
High	P04183	Thymidine kinase, cytosolic OS=Homo sapiens OX=9606 GN=TK1 PE=1 SV=2	22	6	4	cell organization and biogenesis;metabolic process	cytoplasm;cytosol	catalytic activity;metal ion binding;nucleotide binding;protein binding	TK1	17	Metabolic pathways; Pyrimidine metabolism; Drug metabolism - other enzymes	Activation of E2F1 target genes at G1/S; Pyrimidine salvage	0.308	6.23	5.84835e+06	1.61338e+06	High	Peak Found
High	Q96H55	Unconventional myosin-XIX OS=Homo sapiens OX=9606 GN=MYO19 PE=1 SV=2	6	4	4	regulation of biological process	cytoplasm;cytoskeleton;membrane;mitochondrion	catalytic activity;motor activity;nucleotide binding;protein binding	MYO19	17; CHR_HSCHR17_7_CTG4			0.308	43.89	3.75111e+06	947807	High	Peak Found
High	Q7Z3B1	Neuronal growth regulator 1 OS=Homo sapiens OX=9606 GN=NEGR1 PE=1 SV=3	6	4	2	metabolic process;regulation of biological process;response to stimulus	extracellular;membrane	protein binding	NEGR1	1	Cell adhesion molecules (CAMs)	Post-translational modification: synthesis of GPI-anchored proteins	0.311	63.64	3.56642e+06	978753	High	Peak Found
High	P13929	Beta-enolase OS=Homo sapiens OX=9606 GN=ENO3 PE=1 SV=5	65	138	16	metabolic process	cytoplasm;cytosol;membrane	catalytic activity;metal ion binding	ENO3	17	HIF-1 signaling pathway; Carbon metabolism; Glycolysis / Gluconeogenesis; RNA degradation; Biosynthesis of amino acids; Metabolic pathways	Gluconeogenesis; Glycolysis	0.314	38.89	1.13081e+08	3.50887e+07	High	Peak Found
High	O14745	Na(+)/H(+) exchange regulatory cofactor NHE-RF1 OS=Homo sapiens OX=9606 GN=SLC9A3R1 PE=1 SV=4	57	28	16	cell differentiation;cell organization and biogenesis;cellular homeostasis;regulation of biological process;response to stimulus;transport	cytoplasm;cytoskeleton;membrane;nucleus	protein binding;structural molecule activity	SLC9A3R1	17			0.314	22.93	1.00009e+08	2.72949e+07	High	Peak Found
High	Q9NP77	RNA polymerase II subunit A C-terminal domain phosphatase SSU72 OS=Homo sapiens OX=9606 GN=SSU72 PE=1 SV=1	38	8	6	metabolic process;regulation of biological process	cytoplasm;cytosol;nucleus	catalytic activity;protein binding	SSU72	1	mRNA surveillance pathway	RNA polymerase II transcribes snRNA genes	0.314	52.73	38232396	6.8735e+06	High	Peak Found
High	Q9NVI1	Fanconi anemia group I protein OS=Homo sapiens OX=9606 GN=FANCI PE=1 SV=4	10	11	10	metabolic process;regulation of biological process;response to stimulus	cytosol;membrane;nucleus	DNA binding;protein binding	FANCI	15	Fanconi anemia pathway	Fanconi Anemia Pathway; TP53 Regulates Transcription of DNA Repair Genes	0.316	79.82	5.5613e+06	5.36028e+06	High	Peak Found
High	Q9H4I3	TraB domain-containing protein OS=Homo sapiens OX=9606 GN=TRABD PE=1 SV=1	13	4	3				TRABD	22			0.316	71.55	8.03488e+06	3.04731e+06	High	Peak Found
High	Q9NZD8	Maspardin OS=Homo sapiens OX=9606 GN=SPG21 PE=1 SV=1	8	1	1	metabolic process;regulation of biological process;response to stimulus	cytoplasm;cytosol;endosome;Golgi;membrane	catalytic activity;protein binding	SPG21	15	Endocytosis		0.316	0	574415	181514	High	Peak Found
High	Q8IVF2	Protein AHNAK2 OS=Homo sapiens OX=9606 GN=AHNAK2 PE=1 SV=2	18	35	29	cell organization and biogenesis	cytoplasm;cytosol;membrane;nucleus	protein binding	AHNAK2	14			0.318	24.23	7.61692e+07	2.08619e+07	High	Peak Found
High	Q02241	Kinesin-like protein KIF23 OS=Homo sapiens OX=9606 GN=KIF23 PE=1 SV=3	8	12	8	cell division;cell organization and biogenesis;cellular component movement;regulation of biological process;transport	cytoplasm;cytoskeleton;cytosol;nucleus	catalytic activity;motor activity;nucleotide binding;protein binding	KIF23	15	MicroRNAs in cancer	COPI-dependent Golgi-to-ER retrograde traffic; Kinesins; MHC class II antigen presentation; Mitotic Telophase/Cytokinesis	0.319	18.65	2.78191e+07	3.50084e+06	High	Peak Found
High	Q96BY6	Dedicator of cytokinesis protein 10 OS=Homo sapiens OX=9606 GN=DOCK10 PE=1 SV=3	1	1	1	cell differentiation;cell organization and biogenesis;regulation of biological process;response to stimulus	cytoplasm;membrane;nucleus	protein binding	DOCK10	2		Factors involved in megakaryocyte development and platelet production	0.319	0	1.78463e+06	569090	High	Peak Found
High	Q9BRX5	DNA replication complex GINS protein PSF3 OS=Homo sapiens OX=9606 GN=GINS3 PE=1 SV=1	13	3	3	metabolic process	nucleus		GINS3	16		Unwinding of DNA	0.32	0	3.39917e+06	588258	High	Peak Found
High	O75792	Ribonuclease H2 subunit A OS=Homo sapiens OX=9606 GN=RNASEH2A PE=1 SV=2	10	4	3	metabolic process;response to stimulus	cytosol;nucleus	catalytic activity;metal ion binding;RNA binding	RNASEH2A	19	DNA replication		0.322	0	3.16444e+06	884010	High	Peak Found
Low	Q8IYE0	Coiled-coil domain-containing protein 146 OS=Homo sapiens OX=9606 GN=CCDC146 PE=1 SV=2	1	1	1		cytoplasm;cytoskeleton	protein binding	CCDC146	7			0.322	0	3.56861e+06	1.15038e+06	High	Peak Found
High	P02751	Fibronectin OS=Homo sapiens OX=9606 GN=FN1 PE=1 SV=4	29	133	57	cell differentiation;cell organization and biogenesis;cellular component movement;defense response;metabolic process;regulation of biological process;response to stimulus;transport	extracellular;membrane;organelle lumen	enzyme regulator activity;protein binding	FN1	2	Amoebiasis; Pathways in cancer; AGE-RAGE signaling pathway in diabetic complications; Focal adhesion; Proteoglycans in cancer; Regulation of actin cytoskeleton; Bacterial invasion of epithelial cells; Small cell lung cancer; ECM-receptor interaction; PI3K-Akt signaling pathway	Post-translational protein phosphorylation; Integrin cell surface interactions; Regulation of Insulin-like Growth Factor (IGF) transport and uptake by Insulin-like Growth Factor Binding Proteins (IGFBPs); Signaling by BRAF and RAF fusions; MET activates PTK2 signaling; MAP2K and MAPK activation; Molecules associated with elastic fibres; GRB2:SOS provides linkage to MAPK signaling for Integrins ; …	0.324	34.61	6.93798e+08	3.05089e+08	High	Peak Found
High	Q8WWQ0	PH-interacting protein OS=Homo sapiens OX=9606 GN=PHIP PE=1 SV=2	2	5	4	cell organization and biogenesis;regulation of biological process;response to stimulus	nucleus	protein binding	PHIP	6			0.326	9.9	5.02014e+06	1.03886e+06	High	Peak Found
High	Q9H2U1	ATP-dependent DNA/RNA helicase DHX36 OS=Homo sapiens OX=9606 GN=DHX36 PE=1 SV=2	13	11	10	metabolic process;regulation of biological process;response to stimulus	chromosome;cytoplasm;cytosol;nucleus	catalytic activity;DNA binding;nucleotide binding;protein binding;RNA binding	DHX36	3	RNA degradation	TRAF6 mediated IRF7 activation in TLR7/8 or 9 signaling; DEx/H-box helicases activate type I IFN and inflammatory cytokines production ; TRAF6 mediated IRF7 activation	0.328	17.76	2.73347e+07	7.13348e+06	High	Peak Found
High	P07099	Epoxide hydrolase 1 OS=Homo sapiens OX=9606 GN=EPHX1 PE=1 SV=1	23	15	10	metabolic process;response to stimulus	endoplasmic reticulum;membrane	catalytic activity;protein binding	EPHX1	1	Bile secretion; Metabolism of xenobiotics by cytochrome P450; Chemical carcinogenesis	Phase I - Functionalization of compounds	0.329	12.55	5.68e+07	1.7242e+07	High	Peak Found
High	A0A3B3ITS8	Uncharacterized protein (Fragment) OS=Homo sapiens OX=9606 PE=4 SV=1	22	5	4								0.329	21.37	7.08276e+06	2.11555e+06	High	Peak Found
High	Q5T1C6	Acyl-coenzyme A thioesterase THEM4 OS=Homo sapiens OX=9606 GN=THEM4 PE=1 SV=1	6	1	1	cell death;cell organization and biogenesis;metabolic process;regulation of biological process;response to stimulus	cytoplasm;cytosol;membrane;mitochondrion;organelle lumen	catalytic activity;protein binding	THEM4	1	PI3K-Akt signaling pathway	Mitochondrial Fatty Acid Beta-Oxidation; CD28 dependent PI3K/Akt signaling; Activation of AKT2; VEGFR2 mediated vascular permeability; Negative regulation of the PI3K/AKT network	0.329	0	1.39224e+06	458539	High	Peak Found
High	Q14573	Inositol 1,4,5-trisphosphate receptor type 3 OS=Homo sapiens OX=9606 GN=ITPR3 PE=1 SV=2	8	24	16	cell organization and biogenesis;cellular homeostasis;regulation of biological process;response to stimulus;transport	cytoplasm;endoplasmic reticulum;membrane;nucleus	metal ion binding;protein binding;receptor activity;signal transducer activity;transporter activity	ITPR3	6	Dopaminergic synapse; Serotonergic synapse; NOD-like receptor signaling pathway; Vascular smooth muscle contraction; Glutamatergic synapse; cGMP-PKG signaling pathway; Renin secretion; Oxytocin signaling pathway; Circadian entrainment; Long-term potentiation; Insulin secretion; Gap junction; Phosphatidylinositol signaling system; Taste transduction; Glucagon signaling pathway; Thyroid hormone syn…	Ion homeostasis; FCERI mediated Ca+2 mobilization; PLC beta mediated events; Ca2+ pathway; DAG and IP3 signaling; Glucagon-like Peptide-1 (GLP1) regulates insulin secretion; Elevation of cytosolic Ca2+ levels; Effects of PIP2 hydrolysis; Gastrin-CREB signalling pathway via PKC and MAPK; VEGFR2 mediated cell proliferation; CLEC7A (Dectin-1) induces NFAT activation; Antigen activates B Cell Recepto…	0.33	17.74	1.32499e+08	6.19069e+07	High	Peak Found
High	Q9HC52	Chromobox protein homolog 8 OS=Homo sapiens OX=9606 GN=CBX8 PE=1 SV=3	7	3	3	cell organization and biogenesis;metabolic process;regulation of biological process;response to stimulus	nucleus	enzyme regulator activity;protein binding;RNA binding	CBX8	17		RUNX1 interacts with co-factors whose precise effect on RUNX1 targets is not known; SUMOylation of chromatin organization proteins; Regulation of PTEN gene transcription; SUMOylation of DNA damage response and repair proteins; Oxidative Stress Induced Senescence; SUMOylation of RNA binding proteins	0.33	77.31	4.83698e+06	1.56077e+06	High	Peak Found
High	P16401	Histone H1.5 OS=Homo sapiens OX=9606 GN=HIST1H1B PE=1 SV=3	63	108	16	cell organization and biogenesis;regulation of biological process	chromosome;nucleus	DNA binding;protein binding;RNA binding	HIST1H1B	6		Formation of Senescence-Associated Heterochromatin Foci (SAHF); Activation of DNA fragmentation factor	0.331	21.59	8.05867e+08	3.01252e+08	High	Peak Found	Met-loss [N-Term]
High	Q15021	Condensin complex subunit 1 OS=Homo sapiens OX=9606 GN=NCAPD2 PE=1 SV=3	14	25	18	cell division;cell organization and biogenesis;metabolic process	chromosome;cytoplasm;cytosol;membrane;nucleus	protein binding	NCAPD2	12		Condensation of Prometaphase Chromosomes	0.331	16.12	3.9719e+07	1.25056e+07	High	Peak Found
High	O15269	Serine palmitoyltransferase 1 OS=Homo sapiens OX=9606 GN=SPTLC1 PE=1 SV=1	19	13	9	metabolic process	endoplasmic reticulum;membrane	catalytic activity;protein binding	SPTLC1	9	Sphingolipid metabolism; Sphingolipid signaling pathway; Metabolic pathways	Sphingolipid de novo biosynthesis	0.331	9.29	33888768	1.10009e+07	High	Peak Found
High	Q9NTJ3	Structural maintenance of chromosomes protein 4 OS=Homo sapiens OX=9606 GN=SMC4 PE=1 SV=2	23	45	29	cell division;cell organization and biogenesis;metabolic process	chromosome;cytoplasm;cytosol;nucleus	nucleotide binding;protein binding	SMC4	3		Condensation of Prometaphase Chromosomes; Condensation of Prophase Chromosomes	0.333	18.73	1.53228e+08	3.91159e+07	High	Peak Found
High	P21796	Voltage-dependent anion-selective channel protein 1 OS=Homo sapiens OX=9606 GN=VDAC1 PE=1 SV=2	79	157	24	cell communication;cell death;cell differentiation;defense response;metabolic process;regulation of biological process;response to stimulus;transport	membrane;mitochondrion;nucleus	protein binding;transporter activity	VDAC1	5	NOD-like receptor signaling pathway; cGMP-PKG signaling pathway; Huntington's disease; HTLV-I infection; Parkinson's disease; Influenza A; Calcium signaling pathway	Mitochondrial calcium ion transport; Ub-specific processing proteases; Mitochondrial protein import; Pink/Parkin Mediated Mitophagy	0.334	21.2	1.3749e+09	5.37367e+08	High	Peak Found
High	Q96T88	E3 ubiquitin-protein ligase UHRF1 OS=Homo sapiens OX=9606 GN=UHRF1 PE=1 SV=1	7	8	4	cell organization and biogenesis;cell proliferation;metabolic process;regulation of biological process;response to stimulus	nucleus	catalytic activity;DNA binding;metal ion binding;nucleotide binding;protein binding	UHRF1	19		DNA methylation	0.335	37.77	1.15588e+07	3.68156e+06	High	Peak Found
High	Q9NRG7	Epimerase family protein SDR39U1 OS=Homo sapiens OX=9606 GN=SDR39U1 PE=1 SV=3	13	4	2								0.335	54.53	1.61439e+06	574190	High	Peak Found
High	P62834	Ras-related protein Rap-1A OS=Homo sapiens OX=9606 GN=RAP1A PE=1 SV=1	51	26	1	cell organization and biogenesis;cellular homeostasis;regulation of biological process;response to stimulus;transport	cytoplasm;cytosol;endosome;membrane	catalytic activity;nucleotide binding;protein binding;transporter activity	RAP1A	1	Neurotrophin signaling pathway; Rap1 signaling pathway; MAPK signaling pathway; Long-term potentiation; Renal cell carcinoma; Pancreatic secretion; Focal adhesion; Leukocyte transendothelial migration; Ras signaling pathway; Chemokine signaling pathway; cAMP signaling pathway; Platelet activation	Signaling by BRAF and RAF fusions; MAP2K and MAPK activation; Glucagon-like Peptide-1 (GLP1) regulates insulin secretion; ARMS-mediated activation; GRB2:SOS provides linkage to MAPK signaling for Integrins ; MET activates RAP1 and RAC1; Signaling by RAS mutants; Signaling by high-kinase activity BRAF mutants; Signaling by moderate kinase activity BRAF mutants; p130Cas linkage to MAPK signaling fo…	0.336	0	3.89438e+06	1.3066e+06	High	Peak Found
High	Q9BWS9	Chitinase domain-containing protein 1 OS=Homo sapiens OX=9606 GN=CHID1 PE=1 SV=1	8	3	3	defense response;metabolic process;regulation of biological process;response to stimulus;transport	endosome;extracellular;membrane;nucleus;organelle lumen;vacuole	catalytic activity;protein binding	CHID1	11		Platelet degranulation	0.336	39.6	4.90408e+06	1.53402e+06	High	Peak Found
High	Q7L2E3	ATP-dependent RNA helicase DHX30 OS=Homo sapiens OX=9606 GN=DHX30 PE=1 SV=1	28	36	31	cell organization and biogenesis;metabolic process	cytoplasm;cytosol;mitochondrion	catalytic activity;nucleotide binding;protein binding;RNA binding	DHX30	3			0.338	20.65	9.45509e+07	3.18677e+07	High	Peak Found
High	P06493	Cyclin-dependent kinase 1 OS=Homo sapiens OX=9606 GN=CDK1 PE=1 SV=3	58	32	13	cell death;cell differentiation;cell division;cell organization and biogenesis;cell proliferation;cellular component movement;metabolic process;regulation of biological process;response to stimulus	cytoplasm;cytoskeleton;cytosol;membrane;mitochondrion;nucleus;organelle lumen	catalytic activity;nucleotide binding;protein binding;receptor activity	CDK1	10	Viral carcinogenesis; Epstein-Barr virus infection; Progesterone-mediated oocyte maturation; Gap junction; p53 signaling pathway; Oocyte meiosis; Herpes simplex infection; Cell cycle	Regulation of PLK1 Activity at G2/M Transition; TP53 Regulates Transcription of Genes Involved in G2 Cell Cycle Arrest; Recruitment of NuMA to mitotic centrosomes; Ovarian tumor domain proteases; Loss of Nlp from mitotic centrosomes; Activation of E2F1 target genes at G1/S; MASTL Facilitates Mitotic Progression; Golgi Cisternae Pericentriolar Stack Reorganization; Activation of NIMA Kinases NEK9,…	0.338	12.94	2.29788e+08	9.16166e+07	High	Peak Found
High	Q7Z4H8	Protein O-glucosyltransferase 3 OS=Homo sapiens OX=9606 GN=KDELC2 PE=1 SV=2	10	4	4	metabolic process	endoplasmic reticulum;organelle lumen	catalytic activity;protein binding	KDELC2	11			0.338	31.69	8.25368e+06	3.01086e+06	High	Peak Found
High	Q86TN4	tRNA 2'-phosphotransferase 1 OS=Homo sapiens OX=9606 GN=TRPT1 PE=1 SV=2	4	1	1	metabolic process;regulation of biological process		catalytic activity	TRPT1	11			0.338	0	3.83665e+06	1.29515e+06	High	Peak Found
High	P50897	Palmitoyl-protein thioesterase 1 OS=Homo sapiens OX=9606 GN=PPT1 PE=1 SV=1	34	16	8	cell communication;cell organization and biogenesis;cellular homeostasis;metabolic process;regulation of biological process;response to stimulus;transport	cytosol;extracellular;Golgi;membrane;nucleus;organelle lumen;vacuole	catalytic activity;protein binding	PPT1	1	Lysosome; Fatty acid elongation; Metabolic pathways; Fatty acid metabolism	Fatty acyl-CoA biosynthesis	0.339	8.51	7.99735e+07	2.80757e+07	High	Peak Found
High	P48681	Nestin OS=Homo sapiens OX=9606 GN=NES PE=1 SV=2	2	3	3	cell organization and biogenesis;cell proliferation;development;regulation of biological process	cytoplasm;cytoskeleton	protein binding;structural molecule activity	NES	1			0.339	0	2.9817e+06	354390	High	Peak Found
High	Q8NHH9	Atlastin-2 OS=Homo sapiens OX=9606 GN=ATL2 PE=1 SV=2	2	2	1	cell organization and biogenesis;transport	endoplasmic reticulum;membrane	catalytic activity;nucleotide binding;protein binding	ATL2	2			0.339	0	5.88587e+06	1.99687e+06	High	Peak Found
High	Q9BY77	Polymerase delta-interacting protein 3 OS=Homo sapiens OX=9606 GN=POLDIP3 PE=1 SV=2	25	8	8	metabolic process;regulation of biological process;transport	cytoplasm;cytosol;nucleus	protein binding;RNA binding	POLDIP3	22		Cleavage of Growing Transcript in the Termination Region ; Transport of Mature mRNA derived from an Intron-Containing Transcript; mRNA 3'-end processing	0.34	4.8	2.69837e+07	7.76887e+06	High	Peak Found
High	O60566	Mitotic checkpoint serine/threonine-protein kinase BUB1 beta OS=Homo sapiens OX=9606 GN=BUB1B PE=1 SV=3	9	8	8	cell death;cell division;cell organization and biogenesis;cell proliferation;metabolic process;regulation of biological process	chromosome;cytoplasm;cytoskeleton;cytosol;nucleus	catalytic activity;nucleotide binding;protein binding	BUB1B	15	HTLV-I infection; Cell cycle	Inactivation of APC/C via direct inhibition of the APC/C complex; Amplification of signal from unattached kinetochores via a MAD2 inhibitory signal; Separation of Sister Chromatids; Resolution of Sister Chromatid Cohesion; RHO GTPases Activate Formins; Cdc20:Phospho-APC/C mediated degradation of Cyclin A; APC-Cdc20 mediated degradation of Nek2A	0.34	22.14	1.35087e+07	5.41705e+06	High	Peak Found
High	P61024	Cyclin-dependent kinases regulatory subunit 1 OS=Homo sapiens OX=9606 GN=CKS1B PE=1 SV=1	20	1	1	cell division;metabolic process;regulation of biological process		catalytic activity;enzyme regulator activity;protein binding	CKS1B	1	Pathways in cancer; Small cell lung cancer	Cyclin D associated events in G1; SCF(Skp2)-mediated degradation of p27/p21	0.34	0	3.34128e+06	1.13532e+06	High	Peak Found
Medium	Q13111	Chromatin assembly factor 1 subunit A OS=Homo sapiens OX=9606 GN=CHAF1A PE=1 SV=3	1	1	1								0.34	0	631755	214922	High	Peak Found
Low	Q9NPE2	Neugrin OS=Homo sapiens OX=9606 GN=NGRN PE=1 SV=2	3	1	1	cell differentiation;development	extracellular;nucleus	RNA binding	NGRN	15			0.34	0	985836	334905	High	Peak Found
High	Q6PID6	Tetratricopeptide repeat protein 33 OS=Homo sapiens OX=9606 GN=TTC33 PE=1 SV=2	11	4	3			protein binding	TTC33	5			0.342	11.78	5.66055e+06	3.01809e+06	High	Peak Found
High	Q8NEJ9	Neuroguidin OS=Homo sapiens OX=9606 GN=NGDN PE=1 SV=1	7	2	2	metabolic process;regulation of biological process	chromosome;cytoplasm;mitochondrion;nucleus	protein binding;RNA binding	NGDN	14			0.342	6.77	9.05273e+06	2.98526e+06	High	Peak Found
High	Q68DU8	BTB/POZ domain-containing protein KCTD16 OS=Homo sapiens OX=9606 GN=KCTD16 PE=1 SV=1	9	6	2	cell organization and biogenesis;regulation of biological process	membrane	protein binding	KCTD16	5			0.344	0	589378	389719	High	Peak Found
High	Q9ULW0	Targeting protein for Xklp2 OS=Homo sapiens OX=9606 GN=TPX2 PE=1 SV=2	13	12	9	cell death;cell division;cell organization and biogenesis;cell proliferation;regulation of biological process	cytoplasm;cytoskeleton;cytosol;nucleus	nucleotide binding;protein binding	TPX2	20		Regulation of TP53 Activity through Phosphorylation; AURKA Activation by TPX2	0.345	16.61	1.45034e+07	3.4779e+06	High	Peak Found
High	Q8TB61	Adenosine 3'-phospho 5'-phosphosulfate transporter 1 OS=Homo sapiens OX=9606 GN=SLC35B2 PE=1 SV=1	8	6	4	metabolic process;regulation of biological process;response to stimulus;transport	Golgi;membrane	signal transducer activity;transporter activity	SLC35B2	6		Transport and synthesis of PAPS; Transport of nucleotide sugars	0.345	23.18	2.03322e+07	6.84249e+06	High	Peak Found
High	Q5VT79	Annexin A8-like protein 1 OS=Homo sapiens OX=9606 GN=ANXA8L1 PE=2 SV=2	15	6	3			metal ion binding	ANXA8L1	10			0.345	0	6.19105e+06	1.86276e+06	High	Peak Found
High	O14646	Chromodomain-helicase-DNA-binding protein 1 OS=Homo sapiens OX=9606 GN=CHD1 PE=1 SV=2	2	3	2	cell organization and biogenesis;metabolic process;regulation of biological process	cytoplasm;nucleus	catalytic activity;DNA binding;nucleotide binding;protein binding	CHD1	5			0.345	0	1.2501e+07	422439	High	Peak Found
High	Q9BRP1	Programmed cell death protein 2-like OS=Homo sapiens OX=9606 GN=PDCD2L PE=1 SV=1	6	1	1		cytoplasm;membrane		PDCD2L	19			0.345	0	1.23052e+06	424954	High	Peak Found
High	Q7Z2K6	Endoplasmic reticulum metallopeptidase 1 OS=Homo sapiens OX=9606 GN=ERMP1 PE=1 SV=2	10	10	7	metabolic process	endoplasmic reticulum;membrane	catalytic activity;metal ion binding	ERMP1	9			0.346	49.6	2.31263e+07	7330615	High	Peak Found
High	Q9BU76	Multiple myeloma tumor-associated protein 2 OS=Homo sapiens OX=9606 GN=MMTAG2 PE=1 SV=1	9	3	2	transport	extracellular;organelle lumen	protein binding;RNA binding	C1orf35	1		Neutrophil degranulation	0.346	15.94	4.81904e+06	1722697	High	Peak Found
Low	O00398	Putative P2Y purinoceptor 10 OS=Homo sapiens OX=9606 GN=P2RY10 PE=2 SV=1	2	2	1	cellular homeostasis;regulation of biological process;response to stimulus	membrane	receptor activity;signal transducer activity	P2RY10	X	Neuroactive ligand-receptor interaction	P2Y receptors; Gastrin-CREB signalling pathway via PKC and MAPK	0.346	0	3.61397e+06	1.2491e+06	High	Peak Found	Met-loss [N-Term]
High	Q15058	Kinesin-like protein KIF14 OS=Homo sapiens OX=9606 GN=KIF14 PE=1 SV=1	2	3	3	cell division;cell organization and biogenesis;cell proliferation;cellular component movement;metabolic process;regulation of biological process	cytoplasm;cytoskeleton;cytosol;membrane;nucleus	catalytic activity;motor activity;nucleotide binding;protein binding	KIF14	1		RHO GTPases activate CIT	0.348	0	2.43307e+06	496336	High	Peak Found
Medium	Q53EZ4	Centrosomal protein of 55 kDa OS=Homo sapiens OX=9606 GN=CEP55 PE=1 SV=3	2	1	1	cell division;cell organization and biogenesis	cytoplasm;cytoskeleton;membrane	protein binding	CEP55	10			0.349	0	305228	106493	High	Peak Found
High	P46013	Proliferation marker protein Ki-67 OS=Homo sapiens OX=9606 GN=MKI67 PE=1 SV=2	7	18	17	cell proliferation;metabolic process;regulation of biological process;response to stimulus	chromosome;cytoplasm;membrane;nucleus	DNA binding;nucleotide binding;protein binding;RNA binding	MKI67	10			0.35	23.04	2.72582e+07	9321421	High	Peak Found
High	Q13257	Mitotic spindle assembly checkpoint protein MAD2A OS=Homo sapiens OX=9606 GN=MAD2L1 PE=1 SV=1	14	3	3	cell division;cell organization and biogenesis;metabolic process;regulation of biological process	chromosome;cytoplasm;cytoskeleton;cytosol;nucleus	protein binding	MAD2L1	4	Progesterone-mediated oocyte maturation; HTLV-I infection; Oocyte meiosis; Cell cycle	Inactivation of APC/C via direct inhibition of the APC/C complex; Amplification of signal from unattached kinetochores via a MAD2 inhibitory signal; Separation of Sister Chromatids; Resolution of Sister Chromatid Cohesion; RHO GTPases Activate Formins; Cdc20:Phospho-APC/C mediated degradation of Cyclin A; APC-Cdc20 mediated degradation of Nek2A	0.35	36.9	2.47508e+07	8340454	High	Peak Found
Medium	P17342	Atrial natriuretic peptide receptor 3 OS=Homo sapiens OX=9606 GN=NPR3 PE=1 SV=2	1	1	1	cell proliferation;regulation of biological process;response to stimulus;transport	membrane	protein binding;receptor activity;signal transducer activity	NPR3	5			0.35	0	2.51322e+06	880505	High	Peak Found
High	O95347	Structural maintenance of chromosomes protein 2 OS=Homo sapiens OX=9606 GN=SMC2 PE=1 SV=2	43	72	50	cell division;cell organization and biogenesis;metabolic process;regulation of biological process	chromosome;cytoplasm;cytosol;nucleus	catalytic activity;motor activity;nucleotide binding;protein binding	SMC2	9		Condensation of Prometaphase Chromosomes; Condensation of Prophase Chromosomes	0.351	10.91	2.03741e+08	6.46727e+07	High	Peak Found
High	P25440	Bromodomain-containing protein 2 OS=Homo sapiens OX=9606 GN=BRD2 PE=1 SV=2	8	6	4	cell organization and biogenesis;metabolic process;regulation of biological process	cytoplasm;nucleus	protein binding	BRD2	6; CHR_HSCHR6_MHC_SSTO_CTG1; CHR_HSCHR6_MHC_COX_CTG1; CHR_HSCHR6_MHC_QBL_CTG1		RUNX3 regulates p14-ARF	0.351	31.79	5.49725e+06	2.21766e+06	High	Peak Found
Low	Q8TAT5	Endonuclease 8-like 3 OS=Homo sapiens OX=9606 GN=NEIL3 PE=1 SV=3	2	1	1	metabolic process;response to stimulus	nucleus	catalytic activity;DNA binding;metal ion binding	NEIL3	4	Base excision repair		0.351	0	1.70878e+06	600454	High	Peak Found	Met-loss [N-Term]
High	P04216	Thy-1 membrane glycoprotein OS=Homo sapiens OX=9606 GN=THY1 PE=1 SV=2	19	4	2	cell communication;cell organization and biogenesis;metabolic process;regulation of biological process;response to stimulus	cell surface;cytosol;endoplasmic reticulum;extracellular;membrane	enzyme regulator activity;protein binding	THY1	11	Leukocyte transendothelial migration	Post-translational modification: synthesis of GPI-anchored proteins	0.352	2.57	2.43183e+07	8.66594e+06	High	Peak Found
High	Q8WXE1	ATR-interacting protein OS=Homo sapiens OX=9606 GN=ATRIP PE=1 SV=1	1	1	1	metabolic process;regulation of biological process;response to stimulus	nucleus	catalytic activity;protein binding	ATRIP	3	Fanconi anemia pathway	G2/M DNA damage checkpoint; Activation of ATR in response to replication stress; Presynaptic phase of homologous DNA pairing and strand exchange; Processing of DNA double-strand break ends; HDR through Single Strand Annealing (SSA); Regulation of TP53 Activity through Phosphorylation; Fanconi Anemia Pathway	0.352	0	334324	117818	High	Peak Found
High	Q96KB5	Lymphokine-activated killer T-cell-originated protein kinase OS=Homo sapiens OX=9606 GN=PBK PE=1 SV=3	15	7	5	metabolic process;regulation of biological process;response to stimulus	nucleus	catalytic activity;nucleotide binding;protein binding	PBK	8			0.354	42.38	1.98245e+07	1.0156e+07	High	Peak Found
High	Q9H0E9	Bromodomain-containing protein 8 OS=Homo sapiens OX=9606 GN=BRD8 PE=1 SV=2	1	2	1	cell organization and biogenesis;metabolic process;regulation of biological process;response to stimulus	mitochondrion;nucleus	protein binding;receptor activity;signal transducer activity	BRD8	5		HATs acetylate histones	0.354	0	1.92239e+06	679666	High	Peak Found
High	Q96K21	Abscission/NoCut checkpoint regulator OS=Homo sapiens OX=9606 GN=ZFYVE19 PE=1 SV=3	9	5	3	cell division;regulation of biological process	cytoplasm;cytoskeleton	metal ion binding;protein binding	ZFYVE19	15			0.356	29.79	7.43421e+06	2.3777e+06	High	Peak Found
Medium	Q99732	Lipopolysaccharide-induced tumor necrosis factor-alpha factor OS=Homo sapiens OX=9606 GN=LITAF PE=1 SV=2	4	2	1	metabolic process;regulation of biological process;response to stimulus	cytoplasm;cytosol;endosome;Golgi;membrane;nucleus;vacuole	DNA binding;metal ion binding;protein binding;signal transducer activity	LITAF	16	Lysosome		0.356	0	2.29763e+07	8179277	High	Peak Found
High	Q03135	Caveolin-1 OS=Homo sapiens OX=9606 GN=CAV1 PE=1 SV=4	34	13	7	cell communication;cell differentiation;cell organization and biogenesis;cellular component movement;cellular homeostasis;metabolic process;regulation of biological process;response to stimulus;transport	endoplasmic reticulum;endosome;Golgi;membrane	enzyme regulator activity;protein binding;structural molecule activity	CAV1	7	Endocytosis; Focal adhesion; Proteoglycans in cancer; Bacterial invasion of epithelial cells; Viral myocarditis	Triglyceride catabolism; Basigin interactions; eNOS activation; NOSTRIN mediated eNOS trafficking; Disassembly of the destruction complex and recruitment of AXIN to the membrane; VEGFR2 mediated vascular permeability	0.358	5.35	1.72155e+08	6.21666e+07	High	Peak Found
High	Q8IWB1	Inositol 1,4,5-trisphosphate receptor-interacting protein OS=Homo sapiens OX=9606 GN=ITPRIP PE=1 SV=1	8	5	4		membrane		ITPRIP	10			0.358	11.86	10347039	2.37692e+06	High	Peak Found
High	Q8WU79	Stromal membrane-associated protein 2 OS=Homo sapiens OX=9606 GN=SMAP2 PE=1 SV=1	2	2	2	regulation of biological process	cytoplasm	enzyme regulator activity;metal ion binding;protein binding	SMAP2	1	Endocytosis		0.358	0	3.43801e+06	653263	High	Peak Found
High	Q14181	DNA polymerase alpha subunit B OS=Homo sapiens OX=9606 GN=POLA2 PE=1 SV=2	8	4	3	cell organization and biogenesis;cellular homeostasis;metabolic process;transport	cytosol;nucleus	catalytic activity;DNA binding;protein binding	POLA2	11	DNA replication; Purine metabolism; Metabolic pathways; Pyrimidine metabolism	Activation of the pre-replicative complex; Inhibition of replication initiation of damaged DNA by RB1/E2F1; Polymerase switching; M/G1 Transition; DNA replication initiation; Polymerase switching on the C-strand of the telomere; Removal of the Flap Intermediate; Telomere C-strand synthesis initiation	0.359	0	6.76916e+06	1.53888e+06	High	Peak Found
High	Q00765	Receptor expression-enhancing protein 5 OS=Homo sapiens OX=9606 GN=REEP5 PE=1 SV=3	19	8	4		endoplasmic reticulum;membrane	protein binding	REEP5	5		Olfactory Signaling Pathway; GPCR downstream signalling	0.36	59.42	1.77236e+07	8.15904e+06	High	Peak Found
High	Q96RL7	Vacuolar protein sorting-associated protein 13A OS=Homo sapiens OX=9606 GN=VPS13A PE=1 SV=2	0	1	1	metabolic process;response to stimulus;transport	cytosol	protein binding	VPS13A	9			0.36	0	1.04448e+06	375661	High	Peak Found
High	P42330	Aldo-keto reductase family 1 member C3 OS=Homo sapiens OX=9606 GN=AKR1C3 PE=1 SV=4	89	122	16	cell communication;cell differentiation;metabolic process;regulation of biological process;response to stimulus;transport	cytoplasm;cytosol;nucleus	catalytic activity	AKR1C3	10	Ovarian steroidogenesis; Arachidonic acid metabolism; Metabolic pathways; Steroid hormone biosynthesis	Signaling by GPCR; RA biosynthesis pathway; Retinoid metabolism and transport; Synthesis of bile acids and bile salts via 27-hydroxycholesterol; Synthesis of bile acids and bile salts via 24-hydroxycholesterol; Synthesis of bile acids and bile salts via 7alpha-hydroxycholesterol; Synthesis of Prostaglandins (PG) and Thromboxanes (TX)	0.361	37.2	2.5852e+09	6.73331e+08	High	Peak Found
High	P18858	DNA ligase 1 OS=Homo sapiens OX=9606 GN=LIG1 PE=1 SV=1	10	8	7	cell division;metabolic process;response to stimulus	mitochondrion;nucleus	catalytic activity;DNA binding;metal ion binding;nucleotide binding	LIG1	19	DNA replication; Mismatch repair; Base excision repair; Nucleotide excision repair	Mismatch repair (MMR) directed by MSH2:MSH3 (MutSbeta); Mismatch repair (MMR) directed by MSH2:MSH6 (MutSalpha); Gap-filling DNA repair synthesis and ligation in TC-NER; POLB-Dependent Long Patch Base Excision Repair; Gap-filling DNA repair synthesis and ligation in GG-NER; Early Phase of HIV Life Cycle; PCNA-Dependent Long Patch Base Excision Repair; Processive synthesis on the C-strand of the t…	0.361	51.5	1.60246e+07	3.69161e+06	High	Peak Found
High	O60245	Protocadherin-7 OS=Homo sapiens OX=9606 GN=PCDH7 PE=1 SV=2	5	6	4	transport	membrane	metal ion binding	PCDH7	4		Platelet degranulation	0.361	60.97	4.82663e+06	1.77724e+06	High	Peak Found
High	Q9NRZ9	Lymphoid-specific helicase OS=Homo sapiens OX=9606 GN=HELLS PE=1 SV=1	3	3	3	cell division;cell organization and biogenesis;cell proliferation;development;metabolic process;regulation of biological process	nucleus	catalytic activity;nucleotide binding;protein binding	HELLS	10			0.361	0	2.6314e+06	572320	High	Peak Found
High	P49327	Fatty acid synthase OS=Homo sapiens OX=9606 GN=FASN PE=1 SV=3	44	198	88	cell differentiation;metabolic process;regulation of biological process;response to stimulus	cytoplasm;cytosol;Golgi;membrane;mitochondrion	catalytic activity;nucleotide binding;protein binding;RNA binding	FASN	17	Insulin signaling pathway; Fatty acid biosynthesis; AMPK signaling pathway; Metabolic pathways; Fatty acid metabolism	ChREBP activates metabolic gene expression; Fatty acyl-CoA biosynthesis; Vitamin B5 (pantothenate) metabolism; Activation of gene expression by SREBF (SREBP)	0.362	16.99	9.46041e+08	3.54051e+08	High	Peak Found
High	Q9BWH6	RNA polymerase II-associated protein 1 OS=Homo sapiens OX=9606 GN=RPAP1 PE=1 SV=3	5	7	5	metabolic process	nucleus	catalytic activity;DNA binding;protein binding	RPAP1	15			0.362	47.68	3600401	1.46973e+06	High	Peak Found
Medium	Q99418	Cytohesin-2 OS=Homo sapiens OX=9606 GN=CYTH2 PE=1 SV=2	3	2	1	cell organization and biogenesis;regulation of biological process;transport	cytoplasm;cytosol;membrane	protein binding	CYTH2	19	Endocytosis; Phospholipase D signaling pathway	Intra-Golgi traffic	0.362	0	1.82566e+06	660038	High	Peak Found
High	O76070	Gamma-synuclein OS=Homo sapiens OX=9606 GN=SNCG PE=1 SV=2	65	14	8	cell communication;cell organization and biogenesis;regulation of biological process;response to stimulus;transport	cytoplasm;cytoskeleton	protein binding	SNCG	10			0.363	16.89	5.47649e+07	1.90542e+07	High	Peak Found
High	P22830	Ferrochelatase, mitochondrial OS=Homo sapiens OX=9606 GN=FECH PE=1 SV=2	27	11	10	metabolic process;response to stimulus	membrane;mitochondrion;organelle lumen	catalytic activity;metal ion binding;protein binding	FECH	18	Porphyrin and chlorophyll metabolism; Metabolic pathways	Heme biosynthesis	0.363	2.79	3.64784e+07	12147109	High	Peak Found
High	Q8NFV4	Protein ABHD11 OS=Homo sapiens OX=9606 GN=ABHD11 PE=1 SV=1	26	9	7		mitochondrion	catalytic activity	ABHD11	7			0.364	31.37	1.63797e+07	4.13212e+06	High	Peak Found
High	Q10472	Polypeptide N-acetylgalactosaminyltransferase 1 OS=Homo sapiens OX=9606 GN=GALNT1 PE=1 SV=1	14	10	8	metabolic process	extracellular;Golgi;membrane	catalytic activity;metal ion binding	GALNT1	18	Mucin type O-glycan biosynthesis; Metabolic pathways	COPI-independent Golgi-to-ER retrograde traffic; O-linked glycosylation of mucins	0.364	4.93	3.60464e+07	1.1842e+07	High	Peak Found
High	Q9Y6M0	Testisin OS=Homo sapiens OX=9606 GN=PRSS21 PE=1 SV=1	7	5	2	metabolic process	cytoplasm;extracellular;membrane	catalytic activity;protein binding	PRSS21	16; CHR_HSCHR16_5_CTG1		Post-translational modification: synthesis of GPI-anchored proteins	0.364	2.14	1.70676e+07	6.22566e+06	High	Peak Found
High	O43709	Probable 18S rRNA (guanine-N(7))-methyltransferase OS=Homo sapiens OX=9606 GN=BUD23 PE=1 SV=2	14	3	3	cell organization and biogenesis;metabolic process;regulation of biological process	cytoplasm;nucleus	catalytic activity;protein binding;RNA binding	WBSCR22; BUD23	7		Major pathway of rRNA processing in the nucleolus and cytosol; rRNA modification in the nucleus and cytosol	0.364	20.91	9.08093e+06	3.00534e+06	High	Peak Found
High	O75110	Probable phospholipid-transporting ATPase IIA OS=Homo sapiens OX=9606 GN=ATP9A PE=1 SV=3	1	1	1	cell organization and biogenesis;transport	endosome;Golgi;membrane	catalytic activity;metal ion binding;nucleotide binding;transporter activity	ATP9A	20		Ion transport by P-type ATPases	0.365	0	1.41746e+06	517191	High	Peak Found
High	Q04837	Single-stranded DNA-binding protein, mitochondrial OS=Homo sapiens OX=9606 GN=SSBP1 PE=1 SV=1	65	53	13	cell organization and biogenesis;metabolic process;regulation of biological process	mitochondrion;nucleus;organelle lumen	DNA binding;protein binding;RNA binding	SSBP1	7	Homologous recombination; DNA replication; Mismatch repair	Transcriptional activation of mitochondrial biogenesis	0.366	14.58	6.16225e+08	2.35131e+08	High	Peak Found
High	Q9NVP2	Histone chaperone ASF1B OS=Homo sapiens OX=9606 GN=ASF1B PE=1 SV=1	28	3	3	cell differentiation;cell organization and biogenesis;development;metabolic process;regulation of biological process	chromosome;nucleus	protein binding	ASF1B	19			0.366	0	1.22953e+07	4383443	High	Peak Found
High	Q9NQS7	Inner centromere protein OS=Homo sapiens OX=9606 GN=INCENP PE=1 SV=3	4	5	3	cell division;cell organization and biogenesis;metabolic process	chromosome;cytoplasm;cytoskeleton;cytosol;nucleus	protein binding	INCENP	11		Amplification of signal from unattached kinetochores via a MAD2 inhibitory signal; Separation of Sister Chromatids; Resolution of Sister Chromatid Cohesion; RHO GTPases Activate Formins; SUMOylation of DNA replication proteins	0.366	7.82	3.23243e+06	1.1886e+06	High	Peak Found
High	Q15582	Transforming growth factor-beta-induced protein ig-h3 OS=Homo sapiens OX=9606 GN=TGFBI PE=1 SV=1	25	17	12	cell differentiation;cell organization and biogenesis;cell proliferation;metabolic process;regulation of biological process;response to stimulus	extracellular;membrane	protein binding	TGFBI	5		Amyloid fiber formation	0.368	32.91	3.30313e+07	12805024	High	Peak Found
High	Q8IVL6	Prolyl 3-hydroxylase 3 OS=Homo sapiens OX=9606 GN=P3H3 PE=1 SV=1	22	17	12	metabolic process;regulation of biological process	endoplasmic reticulum	catalytic activity;metal ion binding;protein binding	LEPREL2; P3H3	12		Collagen biosynthesis and modifying enzymes	0.368	14.99	5.02262e+07	1.58712e+07	High	Peak Found
High	Q96PZ0	Pseudouridylate synthase 7 homolog OS=Homo sapiens OX=9606 GN=PUS7 PE=1 SV=2	15	13	10	metabolic process	nucleus	catalytic activity;protein binding;RNA binding	PUS7	7		tRNA modification in the nucleus and cytosol	0.369	21.56	2.88845e+07	1.09577e+07	High	Peak Found
High	Q05519	Serine/arginine-rich splicing factor 11 OS=Homo sapiens OX=9606 GN=SRSF11 PE=1 SV=1	19	11	8	metabolic process;transport	nucleus	protein binding;RNA binding	SRSF11	1		Cleavage of Growing Transcript in the Termination Region ; Transport of Mature mRNA derived from an Intron-Containing Transcript; mRNA 3'-end processing; mRNA Splicing - Major Pathway	0.369	10.21	6.40034e+07	2.51468e+07	High	Peak Found
High	Q9H4L4	Sentrin-specific protease 3 OS=Homo sapiens OX=9606 GN=SENP3 PE=1 SV=2	7	5	3	metabolic process	cytoplasm;nucleus	catalytic activity;protein binding	SENP3	17		Major pathway of rRNA processing in the nucleolus and cytosol	0.369	120.79	1.06217e+07	3.68277e+06	High	Peak Found
High	Q96SK2	Transmembrane protein 209 OS=Homo sapiens OX=9606 GN=TMEM209 PE=1 SV=2	7	3	2		membrane		TMEM209	7			0.369	75.84	3.4631e+06	1.23375e+06	High	Peak Found
High	Q68E01	Integrator complex subunit 3 OS=Homo sapiens OX=9606 GN=INTS3 PE=1 SV=1	7	7	5	metabolic process;regulation of biological process;response to stimulus	cytoplasm;nucleus	protein binding	INTS3	1		RNA polymerase II transcribes snRNA genes	0.37	72.95	7.33019e+06	1.59226e+06	High	Peak Found
High	O15260	Surfeit locus protein 4 OS=Homo sapiens OX=9606 GN=SURF4 PE=1 SV=3	14	12	3	cell organization and biogenesis;regulation of biological process;transport	endoplasmic reticulum;Golgi;membrane	protein binding	SURF4	9; CHR_HG2030_PATCH		COPI-dependent Golgi-to-ER retrograde traffic; Neutrophil degranulation	0.371	25.8	8.7595e+07	2.81303e+07	High	Peak Found	Met-loss [N-Term]
High	Q9UJX4	Anaphase-promoting complex subunit 5 OS=Homo sapiens OX=9606 GN=ANAPC5 PE=1 SV=2	5	3	3	cell division;metabolic process;regulation of biological process	cytosol;nucleus	protein binding	ANAPC5	12	Ubiquitin mediated proteolysis; Progesterone-mediated oocyte maturation; HTLV-I infection; Oocyte meiosis; Cell cycle	APC/C:Cdc20 mediated degradation of Cyclin B; Inactivation of APC/C via direct inhibition of the APC/C complex; Autodegradation of Cdh1 by Cdh1:APC/C; APC-Cdc20 mediated degradation of Nek2A; APC/C:Cdh1 mediated degradation of Cdc20 and other APC/C:Cdh1 targeted proteins in late mitosis/early G1; Antigen processing: Ubiquitination & Proteasome degradation; Phosphorylation of the APC/C; APC/C:Cdc2…	0.371	59.1	1.39104e+06	492415	High	Peak Found
Medium	Q6ZNA5	Ferric-chelate reductase 1 OS=Homo sapiens OX=9606 GN=FRRS1 PE=2 SV=2	1	1	1	metabolic process;transport	membrane	catalytic activity;metal ion binding	FRRS1	1			0.371	0	1.78909e+06	663212	High	Peak Found
High	Q9BZF9	Uveal autoantigen with coiled-coil domains and ankyrin repeats OS=Homo sapiens OX=9606 GN=UACA PE=1 SV=2	8	11	9	metabolic process;regulation of biological process;response to stimulus	cytoplasm;cytoskeleton;cytosol;extracellular;nucleus	protein binding	UACA	15			0.372	15.18	1.07592e+07	5.62394e+06	High	Peak Found
High	P35249	Replication factor C subunit 4 OS=Homo sapiens OX=9606 GN=RFC4 PE=1 SV=2	32	14	11	cell organization and biogenesis;cellular homeostasis;metabolic process;regulation of biological process;response to stimulus	nucleus	catalytic activity;DNA binding;nucleotide binding;protein binding	RFC4	3	DNA replication; Mismatch repair; Nucleotide excision repair	Translesion Synthesis by POLH; Termination of translesion DNA synthesis; Translesion synthesis by POLI; Recognition of DNA damage by PCNA-containing replication complex; Translesion synthesis by REV1; Polymerase switching on the C-strand of the telomere; Regulation of TP53 Activity through Phosphorylation; PCNA-Dependent Long Patch Base Excision Repair; G2/M DNA damage checkpoint; Translesion syn…	0.373	18.17	3.45705e+07	1.1727e+07	High	Peak Found
High	P47712	Cytosolic phospholipase A2 OS=Homo sapiens OX=9606 GN=PLA2G4A PE=1 SV=2	45	93	36	metabolic process;regulation of biological process;response to stimulus;transport	cytoplasm;cytosol;endoplasmic reticulum;Golgi;membrane	catalytic activity;metal ion binding;protein binding	PLA2G4A	1	Serotonergic synapse; Ether lipid metabolism; Vascular smooth muscle contraction; Glutamatergic synapse; Ovarian steroidogenesis; Phospholipase D signaling pathway; VEGF signaling pathway; MAPK signaling pathway; Oxytocin signaling pathway; Arachidonic acid metabolism; Linoleic acid metabolism; Choline metabolism in cancer; Long-term depression; Glycerophospholipid metabolism; Fc epsilon RI signa…	COPI-independent Golgi-to-ER retrograde traffic; Acyl chain remodelling of PI; Acyl chain remodelling of PG; Hydrolysis of LPC; Arachidonic acid metabolism; ADP signalling through P2Y purinoceptor 1; phospho-PLA2 pathway; Acyl chain remodeling of CL; Acyl chain remodelling of PS; Acyl chain remodelling of PE; Platelet sensitization by LDL; Signaling by GPCR; Synthesis of PA; Acyl chain remodellin…	0.375	15.22	4.44188e+08	1.71725e+08	High	Peak Found	Met-loss+Acetyl [N-Term]
High	P13995	Bifunctional methylenetetrahydrofolate dehydrogenase/cyclohydrolase, mitochondrial OS=Homo sapiens OX=9606 GN=MTHFD2 PE=1 SV=2	26	10	8	metabolic process	cytosol;mitochondrion;organelle lumen	catalytic activity;metal ion binding	MTHFD2	2	One carbon pool by folate; Metabolic pathways	Metabolism of folate and pterines	0.375	14.79	5.18998e+07	1.93974e+07	High	Peak Found
High	Q15651	High mobility group nucleosome-binding domain-containing protein 3 OS=Homo sapiens OX=9606 GN=HMGN3 PE=1 SV=2	23	3	3	cell organization and biogenesis;regulation of biological process	chromosome;cytosol;nucleus	DNA binding;protein binding	HMGN3	6			0.375	39.26	5.98166e+06	2.45267e+06	High	Peak Found
High	Q96CB9	5-methylcytosine rRNA methyltransferase NSUN4 OS=Homo sapiens OX=9606 GN=NSUN4 PE=1 SV=2	12	5	5	cell organization and biogenesis;metabolic process;regulation of biological process	mitochondrion;organelle lumen	catalytic activity;protein binding;RNA binding	NSUN4	1		rRNA modification in the mitochondrion	0.376	45.03	1.99758e+07	8.07894e+06	High	Peak Found	Met-loss [N-Term]
High	O00625	Pirin OS=Homo sapiens OX=9606 GN=PIR PE=1 SV=1	32	24	9	cell differentiation;metabolic process;regulation of biological process	cytoplasm;cytosol;nucleus	catalytic activity;metal ion binding;protein binding	PIR	X		Digestion	0.377	9.99	1.30662e+08	4.7118e+07	High	Peak Found
High	Q92643	GPI-anchor transamidase OS=Homo sapiens OX=9606 GN=PIGK PE=1 SV=2	14	9	5	metabolic process	endoplasmic reticulum;membrane	catalytic activity;protein binding	PIGK	1	Metabolic pathways; Glycosylphosphatidylinositol (GPI)-anchor biosynthesis	Attachment of GPI anchor to uPAR	0.378	52.41	1.07241e+07	3.00234e+06	High	Peak Found
High	Q8WWH5	Probable tRNA pseudouridine synthase 1 OS=Homo sapiens OX=9606 GN=TRUB1 PE=1 SV=1	11	3	3	metabolic process	mitochondrion	catalytic activity;RNA binding	TRUB1	10			0.378	90.78	3.4606e+06	1548967	High	Peak Found
High	Q9NPA0	ER membrane protein complex subunit 7 OS=Homo sapiens OX=9606 GN=EMC7 PE=1 SV=1	12	2	2		membrane		EMC7	15			0.378	8.59	8.12467e+06	2.98426e+06	High	Peak Found
Low	Q92800	Histone-lysine N-methyltransferase EZH1 OS=Homo sapiens OX=9606 GN=EZH1 PE=1 SV=2	1	1	1	cell organization and biogenesis;metabolic process;regulation of biological process	nucleus	catalytic activity;protein binding	EZH1	17	Lysine degradation		0.378	0	1.98107e+06	748896	High	Peak Found
High	P32322	Pyrroline-5-carboxylate reductase 1, mitochondrial OS=Homo sapiens OX=9606 GN=PYCR1 PE=1 SV=2	37	27	10	metabolic process;regulation of biological process;response to stimulus	mitochondrion;organelle lumen	catalytic activity;nucleotide binding;protein binding	PYCR1	17	Biosynthesis of amino acids; Metabolic pathways; Arginine and proline metabolism	Amino acid synthesis and interconversion (transamination)	0.379	39.06	1.2814e+08	4.72714e+07	High	Peak Found
High	P49590	Probable histidine--tRNA ligase, mitochondrial OS=Homo sapiens OX=9606 GN=HARS2 PE=1 SV=1	22	21	5	cell organization and biogenesis;metabolic process	cytoplasm;mitochondrion;organelle lumen	catalytic activity;nucleotide binding;protein binding;RNA binding	HARS2	5	Aminoacyl-tRNA biosynthesis	Mitochondrial tRNA aminoacylation	0.379	30.95	1.19483e+07	4.62326e+06	High	Peak Found
High	Q02127	Dihydroorotate dehydrogenase (quinone), mitochondrial OS=Homo sapiens OX=9606 GN=DHODH PE=1 SV=3	15	5	4	metabolic process;regulation of biological process;response to stimulus;transport	cytoplasm;cytosol;membrane;mitochondrion	catalytic activity;nucleotide binding	DHODH	16	Metabolic pathways; Pyrimidine metabolism	Pyrimidine biosynthesis	0.379	0	5014236	3.07541e+06	High	Peak Found
Low	Q6UWP2	Dehydrogenase/reductase SDR family member 11 OS=Homo sapiens OX=9606 GN=DHRS11 PE=1 SV=1	3	1	1	metabolic process	extracellular	catalytic activity;nucleotide binding	DHRS11	17; CHR_HSCHR17_7_CTG4			0.38	0	1573765	597388	High	Peak Found
High	Q8WUY1	Protein THEM6 OS=Homo sapiens OX=9606 GN=THEM6 PE=1 SV=2	30	4	4		extracellular		THEM6	8			0.381	38.9	8.82079e+06	2.99825e+06	High	Peak Found
High	P09874	Poly [ADP-ribose] polymerase 1 OS=Homo sapiens OX=9606 GN=PARP1 PE=1 SV=4	61	144	65	cell death;cell differentiation;cell organization and biogenesis;metabolic process;regulation of biological process;response to stimulus	membrane;mitochondrion;nucleus	catalytic activity;DNA binding;metal ion binding;nucleotide binding;protein binding;RNA binding	PARP1	1	Base excision repair; NF-kappa B signaling pathway; Apoptosis	POLB-Dependent Long Patch Base Excision Repair; Dual Incision in GG-NER; Formation of Incision Complex in GG-NER; Downregulation of SMAD2/3:SMAD4 transcriptional activity; DNA Damage Recognition in GG-NER; HDR through MMEJ (alt-NHEJ); SUMOylation of DNA damage response and repair proteins	0.382	17.75	8.06409e+08	3.03935e+08	High	Peak Found
High	Q92979	Ribosomal RNA small subunit methyltransferase NEP1 OS=Homo sapiens OX=9606 GN=EMG1 PE=1 SV=4	52	21	11	metabolic process	cytoplasm;nucleus	catalytic activity;protein binding;RNA binding	EMG1	12	Ribosome biogenesis in eukaryotes	Major pathway of rRNA processing in the nucleolus and cytosol; rRNA modification in the nucleus and cytosol	0.382	10.23	5.12804e+07	2.51232e+07	High	Peak Found
High	Q9UHR4	Brain-specific angiogenesis inhibitor 1-associated protein 2-like protein 1 OS=Homo sapiens OX=9606 GN=BAIAP2L1 PE=1 SV=2	5	3	2	cell organization and biogenesis;regulation of biological process;response to stimulus	cytoplasm;cytoskeleton;cytosol;membrane	protein binding	BAIAP2L1	7			0.382	21.4	7.84656e+06	3.2059e+06	High	Peak Found
Low	Q9H7E2	Tudor domain-containing protein 3 OS=Homo sapiens OX=9606 GN=TDRD3 PE=1 SV=1	1	1	1	cell organization and biogenesis;metabolic process;regulation of biological process	cytoplasm;nucleus	protein binding;RNA binding	TDRD3	13			0.382	0	600747	229746	High	Peak Found
High	P35250	Replication factor C subunit 2 OS=Homo sapiens OX=9606 GN=RFC2 PE=1 SV=3	42	15	10	cell organization and biogenesis;cellular homeostasis;metabolic process;regulation of biological process;response to stimulus	nucleus	catalytic activity;DNA binding;nucleotide binding;protein binding	RFC2	7	DNA replication; Mismatch repair; Nucleotide excision repair	Translesion Synthesis by POLH; Termination of translesion DNA synthesis; Translesion synthesis by POLI; Recognition of DNA damage by PCNA-containing replication complex; Translesion synthesis by REV1; Polymerase switching on the C-strand of the telomere; Regulation of TP53 Activity through Phosphorylation; PCNA-Dependent Long Patch Base Excision Repair; G2/M DNA damage checkpoint; Translesion syn…	0.384	25.46	3.803e+07	2.01512e+07	High	Peak Found
High	P36551	Oxygen-dependent coproporphyrinogen-III oxidase, mitochondrial OS=Homo sapiens OX=9606 GN=CPOX PE=1 SV=3	17	9	6	metabolic process;response to stimulus	cytosol;membrane;mitochondrion	catalytic activity;protein binding;structural molecule activity	CPOX	3	Porphyrin and chlorophyll metabolism; Metabolic pathways	Heme biosynthesis	0.384	41.19	1.28449e+07	5.68808e+06	High	Peak Found
High	Q02388	Collagen alpha-1(VII) chain OS=Homo sapiens OX=9606 GN=COL7A1 PE=1 SV=2	3	8	6	cell differentiation;cell organization and biogenesis;metabolic process;regulation of biological process;transport	extracellular;membrane;organelle lumen	enzyme regulator activity;protein binding	COL7A1	3	Protein digestion and absorption	Collagen degradation; Integrin cell surface interactions; Laminin interactions; Collagen chain trimerization; Cargo concentration in the ER; COPII (Coat Protein 2) Mediated Vesicle Transport; Anchoring fibril formation	0.384	41.25	3.73915e+07	4.97198e+06	High	Peak Found
High	Q99541	Perilipin-2 OS=Homo sapiens OX=9606 GN=PLIN2 PE=1 SV=2	9	3	3	regulation of biological process;response to stimulus;transport	cytoplasm;cytosol;endoplasmic reticulum;extracellular;membrane;nucleus		PLIN2	9	PPAR signaling pathway	PPARA activates gene expression	0.384	8.26	3.22711e+06	1.28213e+06	High	Peak Found
High	A0A140TA45	Valine--tRNA ligase, mitochondrial OS=Homo sapiens OX=9606 GN=VARS2 PE=1 SV=1	1	1	1	metabolic process;regulation of biological process		catalytic activity;nucleotide binding		CHR_HSCHR6_MHC_DBB_CTG1			0.384	0	634350	243831	High	Peak Found
High	Q15003	Condensin complex subunit 2 OS=Homo sapiens OX=9606 GN=NCAPH PE=1 SV=3	28	20	14	cell division;cell organization and biogenesis;metabolic process;regulation of biological process	chromosome;cytoplasm;cytosol;membrane;nucleus	enzyme regulator activity;protein binding	NCAPH	2		Condensation of Prometaphase Chromosomes	0.385	32.7	2.54803e+07	1.01888e+07	High	Peak Found
High	Q9BQ75	Protein CMSS1 OS=Homo sapiens OX=9606 GN=CMSS1 PE=1 SV=2	3	2	1		nucleus	nucleotide binding;RNA binding	CMSS1	3			0.385	0	4.88483e+06	1.88236e+06	High	Peak Found
High	P63162	Small nuclear ribonucleoprotein-associated protein N OS=Homo sapiens OX=9606 GN=SNRPN PE=1 SV=1	32	41	1	metabolic process;response to stimulus	cytoplasm;nucleus;spliceosomal complex	protein binding;RNA binding	SNRPN; SNURF	15		mRNA Splicing - Major Pathway	0.386	0	2746610	1.05985e+06	High	Peak Found
High	P11166	Solute carrier family 2, facilitated glucose transporter member 1 OS=Homo sapiens OX=9606 GN=SLC2A1 PE=1 SV=2	16	28	9	cell communication;cell organization and biogenesis;metabolic process;regulation of biological process;response to stimulus;transport	cytoplasm;cytoskeleton;cytosol;membrane;nucleus	protein binding;transporter activity	SLC2A1	1	HIF-1 signaling pathway; Central carbon metabolism in cancer; Bile secretion; Pathways in cancer; Thyroid hormone signaling pathway; Insulin secretion; Renal cell carcinoma; Glucagon signaling pathway; HTLV-I infection; Insulin resistance; Adipocytokine signaling pathway	Lactose synthesis; Defective SLC2A1 causes GLUT1 deficiency syndrome 1 (GLUT1DS1); Cellular hexose transport; Regulation of insulin secretion; Vitamin C (ascorbate) metabolism	0.387	10.6	3.04031e+08	1.14532e+08	High	Peak Found
High	Q14435	Polypeptide N-acetylgalactosaminyltransferase 3 OS=Homo sapiens OX=9606 GN=GALNT3 PE=1 SV=2	8	4	4	metabolic process;regulation of biological process;response to stimulus	Golgi;membrane	catalytic activity;metal ion binding;protein binding	GALNT3	2	Mucin type O-glycan biosynthesis; Metabolic pathways	O-linked glycosylation of mucins; Defective GALNT3 causes familial hyperphosphatemic tumoral calcinosis (HFTC); FGFR3c ligand binding and activation	0.387	91.91	6.65508e+06	2.63489e+06	High	Peak Found
High	Q16881	Thioredoxin reductase 1, cytoplasmic OS=Homo sapiens OX=9606 GN=TXNRD1 PE=1 SV=3	67	157	38	cell proliferation;cellular homeostasis;metabolic process;regulation of biological process;response to stimulus;transport	cytoplasm;cytosol;mitochondrion;nucleus	antioxidant activity;catalytic activity;nucleotide binding;protein binding	TXNRD1	12	Selenocompound metabolism; Pyrimidine metabolism	Metabolism of ingested MeSeO2H into MeSeH; Uptake and function of diphtheria toxin; Interconversion of nucleotide di- and triphosphates; TP53 Regulates Metabolic Genes; PPARA activates gene expression; Detoxification of Reactive Oxygen Species; Metabolism of ingested H2SeO4 and H2SeO3 into H2Se	0.388	16.13	1.84996e+09	7.54872e+08	High	Peak Found
High	O43292	Glycosylphosphatidylinositol anchor attachment 1 protein OS=Homo sapiens OX=9606 GN=GPAA1 PE=1 SV=3	4	3	2	cell organization and biogenesis;metabolic process	endoplasmic reticulum;membrane	catalytic activity;protein binding	GPAA1	8	Metabolic pathways; Glycosylphosphatidylinositol (GPI)-anchor biosynthesis	Attachment of GPI anchor to uPAR	0.388	23.4	6320329	2.29276e+06	High	Peak Found
High	Q8TCG1	Protein CIP2A OS=Homo sapiens OX=9606 GN=CIP2A PE=1 SV=2	3	4	3	cell differentiation;cell organization and biogenesis;metabolic process;regulation of biological process	cytoplasm;cytosol;membrane	catalytic activity;motor activity;protein binding	KIAA1524; CIP2A	3			0.388	15.35	6.1104e+06	1.4863e+06	High	Peak Found
High	Q9H8H0	Nucleolar protein 11 OS=Homo sapiens OX=9606 GN=NOL11 PE=1 SV=1	6	5	4	metabolic process;regulation of biological process	nucleus	protein binding;RNA binding	NOL11	17		Major pathway of rRNA processing in the nucleolus and cytosol; rRNA modification in the nucleus and cytosol	0.389	16.66	5.31091e+07	4.03833e+06	High	Peak Found
High	Q5T3I0	G patch domain-containing protein 4 OS=Homo sapiens OX=9606 GN=GPATCH4 PE=1 SV=2	11	8	7			protein binding;RNA binding	GPATCH4	1			0.39	19.5	1.95113e+07	9.21781e+06	High	Peak Found
High	P48507	Glutamate--cysteine ligase regulatory subunit OS=Homo sapiens OX=9606 GN=GCLM PE=1 SV=1	27	15	7	cell organization and biogenesis;cellular homeostasis;metabolic process;regulation of biological process;response to stimulus	cytosol	catalytic activity;enzyme regulator activity;protein binding	GCLM	1	Glutathione metabolism; Metabolic pathways; Cysteine and methionine metabolism	Glutathione synthesis and recycling	0.392	5.4	4.29984e+07	1.41414e+07	High	Peak Found
High	Q5JUR7	Testis-expressed protein 30 OS=Homo sapiens OX=9606 GN=TEX30 PE=2 SV=1	15	3	2			catalytic activity	TEX30	13			0.392	0	5345074	2.09534e+06	High	Peak Found
High	O75911	Short-chain dehydrogenase/reductase 3 OS=Homo sapiens OX=9606 GN=DHRS3 PE=1 SV=2	18	7	4	metabolic process;regulation of biological process	membrane	catalytic activity;nucleotide binding	DHRS3	1	Retinol metabolism; Metabolic pathways	Signaling by GPCR; RA biosynthesis pathway; The retinoid cycle in cones (daylight vision)	0.393	16.13	7.31905e+06	2.8861e+06	High	Peak Found
High	P06858	Lipoprotein lipase OS=Homo sapiens OX=9606 GN=LPL PE=1 SV=1	10	6	4	cell organization and biogenesis;metabolic process;regulation of biological process;response to stimulus	cell surface;extracellular;membrane	catalytic activity;protein binding	LPL	8	PPAR signaling pathway; Glycerolipid metabolism; Alzheimer's disease	Signaling by GPCR; Assembly of active LPL and LIPC lipase complexes; Transcriptional regulation of white adipocyte differentiation; Retinoid metabolism and transport; Chylomicron remodeling	0.393	0.9	4.38474e+06	3.28635e+06	High	Peak Found
High	P58546	Myotrophin OS=Homo sapiens OX=9606 GN=MTPN PE=1 SV=2	56	16	5	cell differentiation;cell organization and biogenesis;metabolic process;regulation of biological process;response to stimulus	cytoplasm;cytosol;nucleus	DNA binding;protein binding	LUZP6; MTPN	7			0.394	8.8	1.32768e+08	5.30488e+07	High	Peak Found
High	Q9Y5A7	NEDD8 ultimate buster 1 OS=Homo sapiens OX=9606 GN=NUB1 PE=1 SV=2	6	5	3	metabolic process;regulation of biological process;response to stimulus	cytosol;nucleus	protein binding	NUB1	7		Neddylation	0.394	1.16	5.25155e+06	1.51205e+06	High	Peak Found
High	P48506	Glutamate--cysteine ligase catalytic subunit OS=Homo sapiens OX=9606 GN=GCLC PE=1 SV=2	18	9	8	cell organization and biogenesis;cellular homeostasis;metabolic process;regulation of biological process;response to stimulus	cytosol	catalytic activity;metal ion binding;nucleotide binding;protein binding	GCLC	6	Glutathione metabolism; Metabolic pathways; Cysteine and methionine metabolism	Defective GCLC causes Hemolytic anemia due to gamma-glutamylcysteine synthetase deficiency (HAGGSD); Glutathione synthesis and recycling	0.395	33.69	1.66024e+07	6.13802e+06	High	Peak Found	Met-loss [N-Term]
High	Q9HBM1	Kinetochore protein Spc25 OS=Homo sapiens OX=9606 GN=SPC25 PE=1 SV=1	15	5	3	cell division;cell organization and biogenesis;regulation of biological process	chromosome;cytosol;nucleus	protein binding	SPC25	2; CHR_HSCHR2_1_CTG7_2		Amplification of signal from unattached kinetochores via a MAD2 inhibitory signal; Separation of Sister Chromatids; Resolution of Sister Chromatid Cohesion; RHO GTPases Activate Formins	0.395	17.41	1.01658e+07	2.19558e+06	High	Peak Found
High	P58107	Epiplakin OS=Homo sapiens OX=9606 GN=EPPK1 PE=1 SV=3	68	337	128								0.396	18.29	1.33857e+09	5.35398e+08	High	Peak Found	Met-loss+Acetyl [N-Term]
High	P68431	Histone H3.1 OS=Homo sapiens OX=9606 GN=HIST1H3J PE=1 SV=2	82	163	1	cell organization and biogenesis;coagulation;metabolic process;regulation of biological process;response to stimulus	chromosome;extracellular;membrane;nucleus	catalytic activity;DNA binding;protein binding	HIST1H3F; HIST1H3C; HIST1H3D; HIST1H3G; HIST1H3H; HIST1H3B; HIST1H3A; HIST1H3E; HIST1H3I; HIST1H3J	6	Transcriptional misregulation in cancer; Systemic lupus erythematosus; Alcoholism	SIRT1 negatively regulates rRNA expression; RMTs methylate histone arginines; Activation of anterior HOX genes in hindbrain development during early embryogenesis; NoRC negatively regulates rRNA expression; Interleukin-7 signaling; Factors involved in megakaryocyte development and platelet production; Transcriptional regulation by small RNAs; Meiotic recombination; PRC2 methylates histones and DN…	0.396	7.05	3.91695e+07	1.5771e+07	High	Peak Found
High	P52292	Importin subunit alpha-1 OS=Homo sapiens OX=9606 GN=KPNA2 PE=1 SV=1	52	46	17	metabolic process;regulation of biological process;transport	cytoplasm;cytosol;membrane;nucleus	protein binding;RNA binding;transporter activity	KPNA2	17	Influenza A	ISG15 antiviral mechanism; NS1 Mediated Effects on Host Pathways; Sensing of DNA Double Strand Breaks	0.396	7.31	1.59596e+08	6.96302e+07	High	Peak Found
High	O00418	Eukaryotic elongation factor 2 kinase OS=Homo sapiens OX=9606 GN=EEF2K PE=1 SV=2	6	4	4	metabolic process;regulation of biological process;response to stimulus	cytoplasm;cytosol	catalytic activity;metal ion binding;nucleotide binding;protein binding;RNA binding	EEF2K; LOC101930123	16	Oxytocin signaling pathway; AMPK signaling pathway	mTORC1-mediated signalling	0.396	45.63	9.85929e+06	2.56714e+06	High	Peak Found
High	P23142	Fibulin-1 OS=Homo sapiens OX=9606 GN=FBLN1 PE=1 SV=4	7	6	5	cell organization and biogenesis;metabolic process;regulation of biological process;response to stimulus	extracellular	enzyme regulator activity;metal ion binding;protein binding;structural molecule activity	FBLN1	22		Molecules associated with elastic fibres	0.397	59.18	1.36278e+07	4.70161e+06	High	Peak Found
High	Q9Y3D6	Mitochondrial fission 1 protein OS=Homo sapiens OX=9606 GN=FIS1 PE=1 SV=2	28	15	6	cell death;cell organization and biogenesis;cellular homeostasis;metabolic process;regulation of biological process;response to stimulus;transport	endoplasmic reticulum;membrane;mitochondrion	protein binding	FIS1	7			0.398	8	3.99964e+07	1.70429e+07	High	Peak Found
High	Q96P47	Arf-GAP with GTPase, ANK repeat and PH domain-containing protein 3 OS=Homo sapiens OX=9606 GN=AGAP3 PE=1 SV=2	2	3	1	regulation of biological process;response to stimulus	cytoplasm;membrane	catalytic activity;enzyme regulator activity;metal ion binding;nucleotide binding;protein binding	AGAP3	7	Endocytosis		0.398	0	1.06206e+06	422559	High	Peak Found
Medium	O14681	Etoposide-induced protein 2.4 homolog OS=Homo sapiens OX=9606 GN=EI24 PE=1 SV=4	2	1	1	cell communication;cell death;metabolic process;regulation of biological process;response to stimulus	cytoplasm;cytosol;endoplasmic reticulum;Golgi;membrane;nucleus		EI24	11	p53 signaling pathway		0.398	0	2.12596e+06	847031	High	Peak Found
High	Q96HA7	Tonsoku-like protein OS=Homo sapiens OX=9606 GN=TONSL PE=1 SV=2	4	6	5	metabolic process;regulation of biological process;response to stimulus	cytoplasm;nucleus	protein binding	TONSL	8			0.399	11.38	4.86441e+06	1.24561e+06	High	Peak Found
High	Q969M3	Protein YIPF5 OS=Homo sapiens OX=9606 GN=YIPF5 PE=1 SV=1	8	8	2	regulation of biological process;transport	endoplasmic reticulum;Golgi;membrane	catalytic activity;protein binding	YIPF5	5			0.399	5.53	2.00019e+07	8.02055e+06	High	Peak Found
High	Q9BUK6	Protein misato homolog 1 OS=Homo sapiens OX=9606 GN=MSTO1 PE=1 SV=1	3	3	2	cell organization and biogenesis	cytoplasm;membrane;mitochondrion	catalytic activity	MSTO1	1			0.399	16.41	4.47158e+06	1.80626e+06	High	Peak Found
High	P19075	Tetraspanin-8 OS=Homo sapiens OX=9606 GN=TSPAN8 PE=1 SV=1	10	1	1	regulation of biological process;response to stimulus	cell surface;membrane	protein binding	TSPAN8	12			0.4	0	2.24197e+06	896610	High	Peak Found
High	Q9UNN8	Endothelial protein C receptor OS=Homo sapiens OX=9606 GN=PROCR PE=1 SV=1	15	3	3	cellular component movement;coagulation;regulation of biological process	cell surface;extracellular;membrane	protein binding;receptor activity	PROCR	20	Complement and coagulation cascades	Common Pathway of Fibrin Clot Formation; Cell surface interactions at the vascular wall	0.401	20.87	7.31785e+06	1.92196e+06	High	Peak Found
High	Q9BT17	Mitochondrial ribosome-associated GTPase 1 OS=Homo sapiens OX=9606 GN=MTG1 PE=1 SV=2	8	3	2	regulation of biological process	membrane;mitochondrion;organelle lumen;ribosome	catalytic activity;nucleotide binding	MTG1	10			0.401	0	6.29784e+06	2151286	High	Peak Found
High	Q9H0H5	Rac GTPase-activating protein 1 OS=Homo sapiens OX=9606 GN=RACGAP1 PE=1 SV=1	15	11	9	cell differentiation;cell division;cell organization and biogenesis;cell proliferation;cellular component movement;development;metabolic process;regulation of biological process;response to stimulus;transport	cytoplasm;cytoskeleton;cytosol;endosome;membrane;nucleus	catalytic activity;enzyme regulator activity;metal ion binding;nucleotide binding;protein binding	RACGAP1	12		COPI-dependent Golgi-to-ER retrograde traffic; Kinesins; Rho GTPase cycle; MHC class II antigen presentation	0.402	72.19	2.44887e+07	1.56239e+07	High	Peak Found
High	Q32NC0	UPF0711 protein C18orf21 OS=Homo sapiens OX=9606 GN=C18orf21 PE=1 SV=1	4	1	1				C18orf21	18			0.402	0	1.04018e+06	417969	High	Peak Found
Low	Q3MJ62	Zinc finger and SCAN domain-containing protein 23 OS=Homo sapiens OX=9606 GN=ZSCAN23 PE=1 SV=1	5	1	1	metabolic process;regulation of biological process	nucleus	DNA binding;metal ion binding	ZSCAN23	6			0.402	0	717790	288480	High	Peak Found	Met-loss+Acetyl [N-Term]
High	Q9NR30	Nucleolar RNA helicase 2 OS=Homo sapiens OX=9606 GN=DDX21 PE=1 SV=5	50	74	36	cell differentiation;metabolic process;regulation of biological process;response to stimulus	cytoplasm;membrane;nucleus	catalytic activity;nucleotide binding;protein binding;RNA binding	DDX21	10		Major pathway of rRNA processing in the nucleolus and cytosol; B-WICH complex positively regulates rRNA expression	0.403	20.9	2.79454e+08	1.11957e+08	High	Peak Found
High	P11388	DNA topoisomerase 2-alpha OS=Homo sapiens OX=9606 GN=TOP2A PE=1 SV=3	21	35	21	cell differentiation;cell division;cell organization and biogenesis;metabolic process;regulation of biological process;response to stimulus	chromosome;cytoplasm;nucleus	catalytic activity;DNA binding;metal ion binding;nucleotide binding;protein binding;RNA binding	TOP2A	17	Platinum drug resistance	SUMOylation of DNA replication proteins; Transcription of E2F targets under negative control by DREAM complex	0.403	22.57	8.54663e+07	3.81274e+07	High	Peak Found
High	P04818	Thymidylate synthase OS=Homo sapiens OX=9606 GN=TYMS PE=1 SV=3	16	8	5	metabolic process;regulation of biological process;response to stimulus	cytoplasm;cytosol;membrane;mitochondrion;nucleus;organelle lumen	catalytic activity;nucleotide binding;protein binding;RNA binding;translation regulator activity	TYMS	18	Antifolate resistance; One carbon pool by folate; Metabolic pathways; Pyrimidine metabolism	Activation of E2F1 target genes at G1/S; Interconversion of nucleotide di- and triphosphates	0.403	11.3	1.19785e+07	6.32273e+06	High	Peak Found	Met-loss [N-Term]
High	Q969P6	DNA topoisomerase I, mitochondrial OS=Homo sapiens OX=9606 GN=TOP1MT PE=1 SV=1	5	7	1	cell organization and biogenesis;metabolic process	chromosome;mitochondrion;nucleus	catalytic activity;DNA binding	TOP1MT	8			0.403	0	3.76682e+07	1.51741e+07	High	Peak Found
High	Q8WUX1	Sodium-coupled neutral amino acid transporter 5 OS=Homo sapiens OX=9606 GN=SLC38A5 PE=1 SV=1	5	2	2	transport	membrane	transporter activity	SLC38A5	X	GABAergic synapse	Amino acid transport across the plasma membrane	0.404	73.26	5412996	2.23608e+06	High	Peak Found
High	P33992	DNA replication licensing factor MCM5 OS=Homo sapiens OX=9606 GN=MCM5 PE=1 SV=5	53	86	31	cell division;metabolic process	membrane;nucleus	catalytic activity;DNA binding;nucleotide binding;protein binding	MCM5	22	DNA replication; Cell cycle	M/G1 Transition; Assembly of the pre-replicative complex; Unwinding of DNA; Regulation of DNA replication; Activation of ATR in response to replication stress; Activation of the pre-replicative complex; Orc1 removal from chromatin; Removal of licensing factors from origins	0.405	14.48	3.96535e+08	1.48863e+08	High	Peak Found
High	P78347	General transcription factor II-I OS=Homo sapiens OX=9606 GN=GTF2I PE=1 SV=2	33	49	28	cellular homeostasis;metabolic process;regulation of biological process;response to stimulus	cytoplasm;membrane;nucleus	DNA binding;protein binding	GTF2I	7	Basal transcription factors; cGMP-PKG signaling pathway; Herpes simplex infection		0.405	18.25	1.73332e+08	7.58721e+07	High	Peak Found
High	Q9BPX3	Condensin complex subunit 3 OS=Homo sapiens OX=9606 GN=NCAPG PE=1 SV=1	14	17	13	cell division;cell organization and biogenesis;metabolic process	chromosome;cytoplasm;cytosol;membrane;nucleus	protein binding	NCAPG	4		Condensation of Prometaphase Chromosomes	0.405	4.24	4.44533e+07	2.27987e+07	High	Peak Found
High	A1X283	SH3 and PX domain-containing protein 2B OS=Homo sapiens OX=9606 GN=SH3PXD2B PE=1 SV=3	6	7	6	cell differentiation;cell organization and biogenesis;metabolic process;regulation of biological process	cytoplasm	enzyme regulator activity;protein binding	SH3PXD2B	5			0.405	37.56	1.32206e+07	4.72469e+06	High	Peak Found
High	Q9UKD1	Glucocorticoid modulatory element-binding protein 2 OS=Homo sapiens OX=9606 GN=GMEB2 PE=1 SV=1	3	2	2	metabolic process;regulation of biological process	cytoplasm;cytosol;nucleus	DNA binding;metal ion binding;protein binding	GMEB2	20			0.405	25.16	2358756	902275	High	Peak Found
Medium	Q9UNL4	Inhibitor of growth protein 4 OS=Homo sapiens OX=9606 GN=ING4 PE=1 SV=1	3	1	1	cell death;cell organization and biogenesis;metabolic process;regulation of biological process;response to stimulus	nucleus	metal ion binding;protein binding	ING4	12		HATs acetylate histones	0.405	0	1.3041e+06	528453	High	Peak Found
Medium	Q8N4N3	Kelch-like protein 36 OS=Homo sapiens OX=9606 GN=KLHL36 PE=1 SV=1	2	1	1	metabolic process		catalytic activity;protein binding	KLHL36	16			0.405	0	2.53436e+06	1.02579e+06	High	Peak Found
Medium	Q96AY2	Crossover junction endonuclease EME1 OS=Homo sapiens OX=9606 GN=EME1 PE=1 SV=2	1	1	1	metabolic process;regulation of biological process;response to stimulus	nucleus	catalytic activity;DNA binding;metal ion binding;protein binding	EME1	17	Homologous recombination; Fanconi anemia pathway	Fanconi Anemia Pathway; Resolution of D-loop Structures through Holliday Junction Intermediates	0.405	0	2.18081e+06	883826	High	Peak Found
Low	Q13163	Dual specificity mitogen-activated protein kinase kinase 5 OS=Homo sapiens OX=9606 GN=MAP2K5 PE=1 SV=2	1	1	1	metabolic process;regulation of biological process;response to stimulus	cytoplasm;cytosol;nucleus	catalytic activity;metal ion binding;nucleotide binding;protein binding	MAP2K5	15	Neurotrophin signaling pathway; MAPK signaling pathway; Oxytocin signaling pathway; Gap junction	Signalling to ERK5	0.405	0	682544	276531	High	Peak Found
High	Q9NVM6	DnaJ homolog subfamily C member 17 OS=Homo sapiens OX=9606 GN=DNAJC17 PE=1 SV=1	18	7	4	metabolic process;regulation of biological process;transport	cytoplasm;nucleus	RNA binding	DNAJC17	15			0.406	17.53	5.32147e+06	2.00835e+06	High	Peak Found
High	O43896	Kinesin-like protein KIF1C OS=Homo sapiens OX=9606 GN=KIF1C PE=1 SV=3	5	6	2	cellular component movement;transport	cytoplasm;cytoskeleton;endoplasmic reticulum;Golgi	catalytic activity;motor activity;nucleotide binding;protein binding;RNA binding	KIF1C	17		COPI-dependent Golgi-to-ER retrograde traffic; Kinesins	0.407	0	719247	292425	High	Peak Found
High	Q5T9A4	ATPase family AAA domain-containing protein 3B OS=Homo sapiens OX=9606 GN=ATAD3B PE=1 SV=1	45	75	6	transport	membrane;mitochondrion	catalytic activity;nucleotide binding;RNA binding	ATAD3B	1		Neutrophil degranulation	0.41	4.08	3.87509e+07	1.44658e+07	High	Peak Found
High	Q9NQW6	Anillin OS=Homo sapiens OX=9606 GN=ANLN PE=1 SV=2	3	3	3	cell differentiation;cell division;cell organization and biogenesis;cellular component movement;regulation of biological process	cytoplasm;cytoskeleton;nucleus	protein binding	ANLN	7			0.41	4.6	4.87022e+06	1.61123e+06	High	Peak Found
High	Q9NYY8	FAST kinase domain-containing protein 2, mitochondrial OS=Homo sapiens OX=9606 GN=FASTKD2 PE=1 SV=1	4	2	2	cell organization and biogenesis;metabolic process	mitochondrion;nucleus	catalytic activity;RNA binding	FASTKD2	2			0.41	0	1.2375e+06	334913	High	Peak Found
High	Q14CZ7	FAST kinase domain-containing protein 3, mitochondrial OS=Homo sapiens OX=9606 GN=FASTKD3 PE=1 SV=2	3	2	2	metabolic process	mitochondrion;nucleus	catalytic activity;protein binding;RNA binding	FASTKD3	5			0.41	0	1.01747e+06	416995	High	Peak Found
High	Q9UGN5	Poly [ADP-ribose] polymerase 2 OS=Homo sapiens OX=9606 GN=PARP2 PE=1 SV=2	4	2	2	metabolic process;regulation of biological process;response to stimulus	cytoplasm;nucleus	catalytic activity;DNA binding;protein binding	PARP2	14	Base excision repair; Apoptosis	Formation of Incision Complex in GG-NER; DNA Damage Recognition in GG-NER; POLB-Dependent Long Patch Base Excision Repair; HDR through MMEJ (alt-NHEJ); Dual Incision in GG-NER	0.412	0	2.45291e+06	869321	High	Peak Found
High	Q9P032	NADH dehydrogenase [ubiquinone] 1 alpha subcomplex assembly factor 4 OS=Homo sapiens OX=9606 GN=NDUFAF4 PE=1 SV=1	5	1	1	cell organization and biogenesis	membrane;mitochondrion	protein binding	NDUFAF4	6		Complex I biogenesis	0.412	0	1.09003e+06	448604	High	Peak Found
High	P49643	DNA primase large subunit OS=Homo sapiens OX=9606 GN=PRIM2 PE=1 SV=2	9	5	4	cell organization and biogenesis;cellular homeostasis;metabolic process		catalytic activity;DNA binding;metal ion binding;protein binding	PRIM2	6	DNA replication; Purine metabolism; Metabolic pathways; Pyrimidine metabolism	Activation of the pre-replicative complex; Inhibition of replication initiation of damaged DNA by RB1/E2F1; Polymerase switching; M/G1 Transition; DNA replication initiation; Polymerase switching on the C-strand of the telomere; Removal of the Flap Intermediate; Telomere C-strand synthesis initiation	0.413	8.8	4.37812e+06	1.43308e+06	High	Peak Found
High	Q9Y3D8	Adenylate kinase isoenzyme 6 OS=Homo sapiens OX=9606 GN=AK6 PE=1 SV=1	24	4	3	cell organization and biogenesis;metabolic process;regulation of biological process;response to stimulus	cytoplasm;cytosol;membrane;nucleus	catalytic activity;DNA binding;nucleotide binding;protein binding	AK6; TAF9	5; CHR_HSCHR5_2_CTG1_1	Purine metabolism; Ribosome biogenesis in eukaryotes; Metabolic pathways	Interconversion of nucleotide di- and triphosphates	0.413	4.46	7.56355e+06	3.16084e+06	High	Peak Found
High	Q6RFH5	WD repeat-containing protein 74 OS=Homo sapiens OX=9606 GN=WDR74 PE=1 SV=1	18	7	5		nucleus	protein binding	WDR74	11			0.414	9.93	1.91485e+07	3.1637e+06	High	Peak Found
High	Q96IZ6	Methyltransferase-like protein 2A OS=Homo sapiens OX=9606 GN=METTL2A PE=1 SV=5	7	3	2	metabolic process		catalytic activity	METTL2A	17			0.414	0	2162069	366387	High	Peak Found
High	Q9NUL7	Probable ATP-dependent RNA helicase DDX28 OS=Homo sapiens OX=9606 GN=DDX28 PE=1 SV=2	2	1	1	cell organization and biogenesis;metabolic process	cytosol;mitochondrion;nucleus;organelle lumen	catalytic activity;nucleotide binding;RNA binding	DDX28	16			0.414	0	1.69754e+06	702435	High	Peak Found
High	Q13636	Ras-related protein Rab-31 OS=Homo sapiens OX=9606 GN=RAB31 PE=1 SV=1	24	8	2	cell organization and biogenesis;metabolic process;regulation of biological process;response to stimulus;transport	cytosol;endosome;Golgi;membrane	catalytic activity;nucleotide binding	RAB31	18	Endocytosis	Neutrophil degranulation; RAB GEFs exchange GTP for GDP on RABs; RAB geranylgeranylation	0.415	28.53	2.31987e+07	9.90931e+06	High	Peak Found
High	Q9BU23	Lipase maturation factor 2 OS=Homo sapiens OX=9606 GN=LMF2 PE=1 SV=2	3	2	1	metabolic process	endoplasmic reticulum;membrane	protein binding	LMF2	22		Assembly of active LPL and LIPC lipase complexes	0.415	0	1.70733e+06	707752	High	Peak Found
High	P12277	Creatine kinase B-type OS=Homo sapiens OX=9606 GN=CKB PE=1 SV=1	75	95	22	cellular homeostasis;metabolic process	cytoplasm;cytosol;mitochondrion;nucleus	catalytic activity;nucleotide binding;protein binding	CKB	14	Metabolic pathways; Arginine and proline metabolism	Creatine metabolism	0.416	12.7	8.268e+08	3.51999e+08	High	Peak Found	Met-loss [N-Term]
High	Q5T280	Putative methyltransferase C9orf114 OS=Homo sapiens OX=9606 GN=SPOUT1 PE=1 SV=3	23	8	7	cell division;metabolic process;regulation of biological process;response to stimulus	chromosome;cytoplasm;cytoskeleton	catalytic activity;RNA binding	C9orf114; SPOUT1	9			0.416	3.65	1.71526e+07	6.02797e+06	High	Peak Found
High	Q13308	Inactive tyrosine-protein kinase 7 OS=Homo sapiens OX=9606 GN=PTK7 PE=1 SV=2	6	5	5	cell differentiation;cell organization and biogenesis;cellular component movement;metabolic process;regulation of biological process;response to stimulus	membrane	catalytic activity;nucleotide binding;protein binding	PTK7	6			0.416	1.75	7.8461e+06	3.53236e+06	High	Peak Found
High	Q86VI3	Ras GTPase-activating-like protein IQGAP3 OS=Homo sapiens OX=9606 GN=IQGAP3 PE=1 SV=2	2	14	2	cell organization and biogenesis;metabolic process;regulation of biological process;response to stimulus	cytoplasm;cytosol	protein binding	IQGAP3	1	Regulation of actin cytoskeleton	RHO GTPases activate IQGAPs	0.416	0	280015	116531	High	Peak Found
High	Q12894	Interferon-related developmental regulator 2 OS=Homo sapiens OX=9606 GN=IFRD2 PE=1 SV=3	5	2	2		nucleus	protein binding	IFRD2	3			0.416	15.73	1.5826e+06	616566	High	Peak Found
High	Q9NVH2	Integrator complex subunit 7 OS=Homo sapiens OX=9606 GN=INTS7 PE=1 SV=1	3	2	2	metabolic process;response to stimulus;transport	chromosome;cytoplasm;cytosol;nucleus	protein binding;transporter activity	INTS7	1		RNA polymerase II transcribes snRNA genes	0.416	93.63	3879968	1.63846e+06	High	Peak Found
Medium	Q2TBE0	CWF19-like protein 2 OS=Homo sapiens OX=9606 GN=CWF19L2 PE=1 SV=4	1	1	1			catalytic activity;protein binding	CWF19L2	11			0.416	0	1.13312e+06	471409	High	Peak Found
High	P33993	DNA replication licensing factor MCM7 OS=Homo sapiens OX=9606 GN=MCM7 PE=1 SV=4	63	87	42	cell proliferation;metabolic process;regulation of biological process;response to stimulus	chromosome;cytosol;membrane;nucleus	catalytic activity;DNA binding;nucleotide binding;protein binding	MCM7	7	DNA replication; Cell cycle	M/G1 Transition; Assembly of the pre-replicative complex; Unwinding of DNA; Regulation of DNA replication; Activation of ATR in response to replication stress; Activation of the pre-replicative complex; Orc1 removal from chromatin; Removal of licensing factors from origins	0.417	12.05	4.85955e+08	1.91216e+08	High	Peak Found
High	Q9Y2Q3	Glutathione S-transferase kappa 1 OS=Homo sapiens OX=9606 GN=GSTK1 PE=1 SV=3	60	19	12	cell differentiation;metabolic process	membrane;mitochondrion;organelle lumen	antioxidant activity;catalytic activity;protein binding	GSTK1	7	Peroxisome; Glutathione metabolism; Metabolism of xenobiotics by cytochrome P450; Drug metabolism - cytochrome P450; Chemical carcinogenesis	Glutathione conjugation	0.417	14.84	5.79667e+07	2.1451e+07	High	Peak Found
High	Q9UN37	Vacuolar protein sorting-associated protein 4A OS=Homo sapiens OX=9606 GN=VPS4A PE=1 SV=1	17	10	2	cell communication;cell division;cell organization and biogenesis;metabolic process;regulation of biological process;response to stimulus;transport	cytoplasm;cytosol;endosome;membrane;nucleus;vacuole	catalytic activity;nucleotide binding;protein binding;RNA binding	VPS4A	16	Endocytosis	Budding and maturation of HIV virion; Endosomal Sorting Complex Required For Transport (ESCRT)	0.417	17.14	3.20614e+06	1.23576e+06	High	Peak Found
High	P15289	Arylsulfatase A OS=Homo sapiens OX=9606 GN=ARSA PE=1 SV=3	10	5	4	metabolic process;transport	extracellular;organelle lumen;vacuole	catalytic activity;metal ion binding;protein binding	ARSA	22	Lysosome; Sphingolipid metabolism	The activation of arylsulfatases; Glycosphingolipid metabolism; Neutrophil degranulation	0.417	23.71	7.91478e+06	2.26235e+06	High	Peak Found
High	Q8IZ69	tRNA (uracil-5-)-methyltransferase homolog A OS=Homo sapiens OX=9606 GN=TRMT2A PE=1 SV=2	6	3	3	metabolic process		catalytic activity;RNA binding	TRMT2A	22			0.417	0	2.40285e+06	306184	High	Peak Found
High	Q9NSV4	Protein diaphanous homolog 3 OS=Homo sapiens OX=9606 GN=DIAPH3 PE=1 SV=4	3	5	4	cell organization and biogenesis	cytoplasm;cytosol;nucleus	protein binding	DIAPH3	13	Regulation of actin cytoskeleton	RHO GTPases Activate Formins	0.417	6.17	5.16507e+06	1.65584e+06	High	Peak Found
High	Q9UBZ4	DNA-(apurinic or apyrimidinic site) lyase 2 OS=Homo sapiens OX=9606 GN=APEX2 PE=1 SV=1	3	1	1	metabolic process;response to stimulus	cytoplasm;mitochondrion;nucleus	catalytic activity;DNA binding;metal ion binding	APEX2	X	Base excision repair		0.417	0	404466	168837	High	Peak Found
High	P40938	Replication factor C subunit 3 OS=Homo sapiens OX=9606 GN=RFC3 PE=1 SV=2	33	14	9	cell organization and biogenesis;cellular homeostasis;metabolic process;regulation of biological process;response to stimulus	nucleus	catalytic activity;DNA binding;protein binding	RFC3	13	DNA replication; Mismatch repair; Nucleotide excision repair	Translesion Synthesis by POLH; Termination of translesion DNA synthesis; Translesion synthesis by POLI; Recognition of DNA damage by PCNA-containing replication complex; Translesion synthesis by REV1; Polymerase switching on the C-strand of the telomere; Regulation of TP53 Activity through Phosphorylation; PCNA-Dependent Long Patch Base Excision Repair; G2/M DNA damage checkpoint; Translesion syn…	0.418	44.35	2.38807e+07	9.51008e+06	High	Peak Found
High	Q6PJG6	BRCA1-associated ATM activator 1 OS=Homo sapiens OX=9606 GN=BRAT1 PE=1 SV=2	15	10	7	cell death;cell growth;cell proliferation;cellular component movement;metabolic process;regulation of biological process;response to stimulus	cytoplasm;membrane;nucleus	protein binding	BRAT1	7			0.418	9.8	7.93116e+06	1.56069e+06	High	Peak Found
High	P08183	Multidrug resistance protein 1 OS=Homo sapiens OX=9606 GN=ABCB1 PE=1 SV=3	9	7	7	cell organization and biogenesis;cell proliferation;regulation of biological process;response to stimulus;transport	cell surface;membrane	catalytic activity;nucleotide binding;protein binding;transporter activity	ABCB1	7	Bile secretion; MicroRNAs in cancer; ABC transporters	Abacavir transmembrane transport; ABC-family proteins mediated transport	0.418	21.29	1.19264e+07	3.6591e+06	High	Peak Found
High	P52732	Kinesin-like protein KIF11 OS=Homo sapiens OX=9606 GN=KIF11 PE=1 SV=2	5	5	5	cell division;cell organization and biogenesis;cellular component movement;regulation of biological process;transport	cytoplasm;cytoskeleton;cytosol;membrane	catalytic activity;motor activity;nucleotide binding;protein binding	KIF11	10		COPI-dependent Golgi-to-ER retrograde traffic; Kinesins; MHC class II antigen presentation	0.418	3.05	1.04666e+07	1.09114e+07	High	Peak Found
High	Q6UXH1	Cysteine-rich with EGF-like domain protein 2 OS=Homo sapiens OX=9606 GN=CRELD2 PE=1 SV=1	11	5	4		endoplasmic reticulum;extracellular;Golgi	metal ion binding;protein binding	CRELD2	22			0.418	14.64	1.47187e+07	5.51213e+06	High	Peak Found
High	O95881	Thioredoxin domain-containing protein 12 OS=Homo sapiens OX=9606 GN=TXNDC12 PE=1 SV=1	51	27	11	cell differentiation;cellular homeostasis;metabolic process;regulation of biological process	endoplasmic reticulum;organelle lumen	catalytic activity;protein binding	TXNDC12	1	Glutathione metabolism		0.42	8.97	1.9168e+08	8.10448e+07	High	Peak Found
High	O60678	Protein arginine N-methyltransferase 3 OS=Homo sapiens OX=9606 GN=PRMT3 PE=1 SV=4	7	4	3	cell organization and biogenesis;metabolic process;regulation of biological process	cytoplasm;cytosol;ribosome	catalytic activity;metal ion binding;protein binding	PRMT3	11			0.42	54.58	5.50796e+06	2.47015e+06	High	Peak Found
High	Q9H6E4	Coiled-coil domain-containing protein 134 OS=Homo sapiens OX=9606 GN=CCDC134 PE=1 SV=1	14	2	2		cytoplasm;endoplasmic reticulum;extracellular;membrane;nucleus		CCDC134	22			0.42	8.16	3.26041e+06	1.40426e+06	High	Peak Found
High	Q9H3U5	Major facilitator superfamily domain-containing protein 1 OS=Homo sapiens OX=9606 GN=MFSD1 PE=2 SV=2	2	1	1	transport	membrane		MFSD1	3			0.42	0	1.80413e+06	758534	High	Peak Found
High	P08648	Integrin alpha-5 OS=Homo sapiens OX=9606 GN=ITGA5 PE=1 SV=2	19	56	18	cell differentiation;cell organization and biogenesis;cellular component movement;regulation of biological process;response to stimulus	cell surface;cytoplasm;endoplasmic reticulum;Golgi;membrane	metal ion binding;protein binding;receptor activity	ITGA5	12	Arrhythmogenic right ventricular cardiomyopathy (ARVC); Dilated cardiomyopathy; Hematopoietic cell lineage; MicroRNAs in cancer; Pertussis; Phagosome; Focal adhesion; Proteoglycans in cancer; Regulation of actin cytoskeleton; Bacterial invasion of epithelial cells; ECM-receptor interaction; PI3K-Akt signaling pathway; Hypertrophic cardiomyopathy (HCM); Shigellosis	RUNX2 regulates genes involved in cell migration; Integrin cell surface interactions; Signal transduction by L1; Elastic fibre formation; Fibronectin matrix formation; Cell surface interactions at the vascular wall	0.421	22.21	4.19926e+08	1.83543e+08	High	Peak Found
High	Q96CX2	BTB/POZ domain-containing protein KCTD12 OS=Homo sapiens OX=9606 GN=KCTD12 PE=1 SV=1	47	32	12	cell organization and biogenesis;transport	membrane	protein binding;RNA binding;transporter activity	KCTD12	13			0.421	8.18	1.10933e+08	4.42488e+07	High	Peak Found
High	Q8WW12	PEST proteolytic signal-containing nuclear protein OS=Homo sapiens OX=9606 GN=PCNP PE=1 SV=2	59	23	10	metabolic process	nucleus	protein binding	PCNP	3			0.421	20.6	9.46739e+07	4.17964e+07	High	Peak Found
High	P33991	DNA replication licensing factor MCM4 OS=Homo sapiens OX=9606 GN=MCM4 PE=1 SV=5	54	78	37	metabolic process	membrane;nucleus	catalytic activity;DNA binding;nucleotide binding;protein binding	MCM4	8	DNA replication; Cell cycle	M/G1 Transition; Assembly of the pre-replicative complex; Unwinding of DNA; Regulation of DNA replication; Activation of ATR in response to replication stress; Activation of the pre-replicative complex; Orc1 removal from chromatin; Removal of licensing factors from origins	0.422	17.38	5.16031e+08	2.17595e+08	High	Peak Found	Met-loss [N-Term]
High	Q14978	Nucleolar and coiled-body phosphoprotein 1 OS=Homo sapiens OX=9606 GN=NOLC1 PE=1 SV=2	37	78	32	cell organization and biogenesis;metabolic process;regulation of biological process	cytoplasm;nucleus	nucleotide binding;protein binding;RNA binding	NOLC1	10			0.422	11.74	6.88237e+08	2.90145e+08	High	Peak Found
High	Q9BQ70	Transcription factor 25 OS=Homo sapiens OX=9606 GN=TCF25 PE=1 SV=1	5	2	2	metabolic process;regulation of biological process	nucleus	DNA binding;protein binding	TCF25	16			0.422	0	1367458	576903	High	Peak Found
High	O60488	Long-chain-fatty-acid--CoA ligase 4 OS=Homo sapiens OX=9606 GN=ACSL4 PE=1 SV=2	58	73	36	cell differentiation;metabolic process;regulation of biological process;response to stimulus;transport	cytoplasm;endoplasmic reticulum;membrane;mitochondrion	catalytic activity;nucleotide binding	ACSL4	X	Peroxisome; Fatty acid degradation; PPAR signaling pathway; Fatty acid biosynthesis; Metabolic pathways; Adipocytokine signaling pathway; Fatty acid metabolism	Synthesis of very long-chain fatty acyl-CoAs	0.423	19.2	3.35687e+08	1.63847e+08	High	Peak Found
High	P20839	Inosine-5'-monophosphate dehydrogenase 1 OS=Homo sapiens OX=9606 GN=IMPDH1 PE=1 SV=2	38	30	13	cell proliferation;metabolic process;transport	cytoplasm;cytosol;extracellular;nucleus;organelle lumen	catalytic activity;DNA binding;metal ion binding;RNA binding	IMPDH1	7	Purine metabolism; Metabolic pathways; Drug metabolism - other enzymes	Neutrophil degranulation; Purine ribonucleoside monophosphate biosynthesis	0.423	19.32	6.62067e+07	2.48876e+07	High	Peak Found
High	Q5R3I4	Tetratricopeptide repeat protein 38 OS=Homo sapiens OX=9606 GN=TTC38 PE=1 SV=1	7	2	2			protein binding	TTC38	22			0.423	0	1.20196e+06	223398	High	Peak Found
High	Q9NSI2	Protein FAM207A OS=Homo sapiens OX=9606 GN=FAM207A PE=1 SV=2	10	3	2			protein binding	FAM207A	21			0.423	57.69	4.54326e+06	2.37046e+06	High	Peak Found
High	Q6NUQ4	Transmembrane protein 214 OS=Homo sapiens OX=9606 GN=TMEM214 PE=1 SV=2	4	3	3	cell death	cytosol;endoplasmic reticulum;Golgi;membrane		TMEM214	2			0.424	28.99	7463083	2.43585e+06	High	Peak Found
High	P23921	Ribonucleoside-diphosphate reductase large subunit OS=Homo sapiens OX=9606 GN=RRM1 PE=1 SV=1	52	81	32	metabolic process	cytoplasm;cytosol	catalytic activity;nucleotide binding;protein binding	RRM1	11	Glutathione metabolism; Purine metabolism; Metabolic pathways; Pyrimidine metabolism	Interconversion of nucleotide di- and triphosphates	0.425	10.86	3.51304e+08	1.44537e+08	High	Peak Found
High	Q01650	Large neutral amino acids transporter small subunit 1 OS=Homo sapiens OX=9606 GN=SLC7A5 PE=1 SV=2	10	32	6	cell differentiation;cellular component movement;development;metabolic process;transport	cytoplasm;cytosol;membrane	protein binding;transporter activity	SLC7A5	16	Central carbon metabolism in cancer; mTOR signaling pathway	Tryptophan catabolism; Basigin interactions; Amino acid transport across the plasma membrane	0.425	5.85	405544385	1.73605e+08	High	Peak Found
High	Q8IZV5	Retinol dehydrogenase 10 OS=Homo sapiens OX=9606 GN=RDH10 PE=1 SV=1	10	3	3	metabolic process	cytoplasm;endoplasmic reticulum;membrane;nucleus	catalytic activity	RDH10	8	Retinol metabolism; Metabolic pathways	Signaling by GPCR; The canonical retinoid cycle in rods (twilight vision); RA biosynthesis pathway	0.425	6.33	1.09082e+07	6.12493e+06	High	Peak Found
High	Q92925	SWI/SNF-related matrix-associated actin-dependent regulator of chromatin subfamily D member 2 OS=Homo sapiens OX=9606 GN=SMARCD2 PE=1 SV=3	6	3	2	cell organization and biogenesis;metabolic process;regulation of biological process	nucleus	DNA binding;protein binding	SMARCD2	17		RUNX1 interacts with co-factors whose precise effect on RUNX1 targets is not known; RMTs methylate histone arginines	0.425	0.06	3.50287e+06	1.5183e+06	High	Peak Found
High	P52701	DNA mismatch repair protein Msh6 OS=Homo sapiens OX=9606 GN=MSH6 PE=1 SV=2	16	20	16	cell organization and biogenesis;metabolic process;regulation of biological process;response to stimulus	chromosome;cytosol;Golgi;nucleus	catalytic activity;DNA binding;metal ion binding;nucleotide binding;protein binding	MSH6	2	Colorectal cancer; Pathways in cancer; Mismatch repair; Platinum drug resistance	Defective Mismatch Repair Associated With MSH2; Defective Mismatch Repair Associated With MSH6; Mismatch repair (MMR) directed by MSH2:MSH6 (MutSalpha)	0.426	18.57	3.84004e+07	15713661	High	Peak Found
High	Q9NXW2	DnaJ homolog subfamily B member 12 OS=Homo sapiens OX=9606 GN=DNAJB12 PE=1 SV=5	5	2	2	cell organization and biogenesis;metabolic process;response to stimulus	endoplasmic reticulum;membrane	protein binding	DNAJB12	10			0.426	0	3.09233e+06	822320	High	Peak Found
High	Q9NRY5	Protein FAM114A2 OS=Homo sapiens OX=9606 GN=FAM114A2 PE=1 SV=4	5	2	2			nucleotide binding	FAM114A2	5		Signaling by BRAF and RAF fusions	0.426	0	1.92616e+06	819713	High	Peak Found
Medium	V9GYY5	Uncharacterized protein (Fragment) OS=Homo sapiens OX=9606 PE=4 SV=1	4	1	1					22			0.426	0	461212	196568	High	Peak Found
High	O95379	Tumor necrosis factor alpha-induced protein 8 OS=Homo sapiens OX=9606 GN=TNFAIP8 PE=1 SV=1	25	7	6	cell death;regulation of biological process	cytoplasm	enzyme regulator activity;protein binding	TNFAIP8	5		PI Metabolism	0.427	12.49	2.03592e+07	7.70566e+06	High	Peak Found
High	P14635	G2/mitotic-specific cyclin-B1 OS=Homo sapiens OX=9606 GN=CCNB1 PE=1 SV=1	10	4	4	cell division;cell organization and biogenesis;metabolic process;regulation of biological process;response to stimulus	cytoplasm;cytoskeleton;cytosol;membrane;nucleus;organelle lumen	catalytic activity;enzyme regulator activity;protein binding	CCNB1	5	FoxO signaling pathway; Progesterone-mediated oocyte maturation; p53 signaling pathway; Oocyte meiosis; Cell cycle	APC/C:Cdc20 mediated degradation of Cyclin B; Condensation of Prometaphase Chromosomes; G2/M DNA replication checkpoint; Chk1/Chk2(Cds1) mediated inactivation of Cyclin B:Cdk1 complex; Regulation of PLK1 Activity at G2/M Transition; Polo-like kinase mediated events; Phosphorylation of Emi1; TP53 Regulates Transcription of Genes Involved in G2 Cell Cycle Arrest; E2F-enabled inhibition of pre-repli…	0.427	12.74	6.8818e+06	2.97677e+06	High	Peak Found
High	Q7L4I2	Arginine/serine-rich coiled-coil protein 2 OS=Homo sapiens OX=9606 GN=RSRC2 PE=1 SV=1	5	3	2			protein binding;RNA binding	RSRC2	12			0.427	56.35	5916690	2557150	High	Peak Found
High	P16144	Integrin beta-4 OS=Homo sapiens OX=9606 GN=ITGB4 PE=1 SV=5	5	11	11	cell communication;cell differentiation;cell organization and biogenesis;cellular component movement;metabolic process;regulation of biological process;response to stimulus	cell surface;membrane;nucleus	protein binding;receptor activity	ITGB4	17	Arrhythmogenic right ventricular cardiomyopathy (ARVC); Dilated cardiomyopathy; Focal adhesion; Regulation of actin cytoskeleton; ECM-receptor interaction; PI3K-Akt signaling pathway; Hypertrophic cardiomyopathy (HCM)	Laminin interactions; Assembly of collagen fibrils and other multimeric structures; Type I hemidesmosome assembly; Syndecan interactions	0.428	16.97	2.44296e+07	9.63787e+06	High	Peak Found
High	Q9H8H2	Probable ATP-dependent RNA helicase DDX31 OS=Homo sapiens OX=9606 GN=DDX31 PE=1 SV=2	6	6	6	metabolic process	cytoplasm;Golgi;nucleus	catalytic activity;DNA binding;nucleotide binding;protein binding;RNA binding	DDX31	9			0.428	8.54	1.23117e+07	5.12292e+06	High	Peak Found
High	Q8ND56	Protein LSM14 homolog A OS=Homo sapiens OX=9606 GN=LSM14A PE=1 SV=3	6	7	4	cell organization and biogenesis;defense response;development;regulation of biological process;response to stimulus	cytoplasm;cytosol	DNA binding;RNA binding	LSM14A	19; CHR_HSCHR19_1_CTG3_1			0.428	25.6	9.69631e+06	3550978	High	Peak Found
High	P12004	Proliferating cell nuclear antigen OS=Homo sapiens OX=9606 GN=PCNA PE=1 SV=1	79	72	19	cell differentiation;cell organization and biogenesis;cell proliferation;cellular homeostasis;metabolic process;regulation of biological process;response to stimulus	nucleus	catalytic activity;DNA binding;enzyme regulator activity;protein binding	PCNA	20	Hepatitis B; DNA replication; Mismatch repair; Base excision repair; HTLV-I infection; Nucleotide excision repair; Cell cycle	Translesion Synthesis by POLH; Mismatch repair (MMR) directed by MSH2:MSH6 (MutSalpha); TP53 Regulates Transcription of Genes Involved in G2 Cell Cycle Arrest; HDR through Homologous Recombination (HRR); Termination of translesion DNA synthesis; Translesion synthesis by POLI; Recognition of DNA damage by PCNA-containing replication complex; Translesion synthesis by REV1; Polymerase switching on t…	0.429	13.92	8.30476e+08	3.71746e+08	High	Peak Found
High	Q99933	BAG family molecular chaperone regulator 1 OS=Homo sapiens OX=9606 GN=BAG1 PE=1 SV=4	20	8	5	cell death;metabolic process;regulation of biological process;response to stimulus	cytoplasm;cytosol;nucleus	enzyme regulator activity;nucleotide binding;protein binding;signal transducer activity	BAG1	9	Protein processing in endoplasmic reticulum	Regulation of HSF1-mediated heat shock response	0.429	8.33	8.62116e+06	3.5592e+06	High	Peak Found
High	P60903	Protein S100-A10 OS=Homo sapiens OX=9606 GN=S100A10 PE=1 SV=2	68	43	9	cell organization and biogenesis;regulation of biological process;response to stimulus	endoplasmic reticulum;extracellular;membrane	metal ion binding;protein binding	S100A10	1		Dissolution of Fibrin Clot	0.43	17.2	6.70355e+08	309646952	High	Peak Found	Met-loss [N-Term]
High	Q14CN4	Keratin, type II cytoskeletal 72 OS=Homo sapiens OX=9606 GN=KRT72 PE=1 SV=2	4	63	1	cell death	cytosol	protein binding;structural molecule activity	KRT72	12		Formation of the cornified envelope	0.43	0	5831294	2508191	High	Peak Found
High	Q9Y3E0	Vesicle transport protein GOT1B OS=Homo sapiens OX=9606 GN=GOLT1B PE=1 SV=1	20	4	3	regulation of biological process;response to stimulus;transport	endoplasmic reticulum;Golgi;membrane	signal transducer activity	GOLT1B	12			0.43	0	2.69967e+06	436352	High	Peak Found
High	O14929	Histone acetyltransferase type B catalytic subunit OS=Homo sapiens OX=9606 GN=HAT1 PE=1 SV=1	35	27	11	cell organization and biogenesis;metabolic process;regulation of biological process;response to stimulus	cytoplasm;nucleus	catalytic activity;protein binding	HAT1	2	Alcoholism	HATs acetylate histones	0.431	6.89	1.13164e+08	4.5589e+07	High	Peak Found
High	Q9NR33	DNA polymerase epsilon subunit 4 OS=Homo sapiens OX=9606 GN=POLE4 PE=1 SV=2	35	4	3	cell organization and biogenesis;cellular homeostasis;metabolic process	nucleus	catalytic activity;DNA binding;protein binding	POLE4	2	DNA replication; Purine metabolism; Base excision repair; HTLV-I infection; Nucleotide excision repair; Metabolic pathways; Pyrimidine metabolism	Gap-filling DNA repair synthesis and ligation in TC-NER; HDR through Homologous Recombination (HRR); Activation of the pre-replicative complex; Gap-filling DNA repair synthesis and ligation in GG-NER; Dual Incision in GG-NER; M/G1 Transition; Termination of translesion DNA synthesis; Recognition of DNA damage by PCNA-containing replication complex; DNA replication initiation; Dual incision in TC-…	0.431	0	1.73347e+06	747914	High	Peak Found
High	P21926	CD9 antigen OS=Homo sapiens OX=9606 GN=CD9 PE=1 SV=4	20	5	3	cell organization and biogenesis;cellular component movement;metabolic process;regulation of biological process;response to stimulus;transport	cell surface;membrane	protein binding	CD9	12	Hematopoietic cell lineage	Platelet degranulation ; Sperm:Oocyte Membrane Binding; Uptake and function of diphtheria toxin	0.431	24.75	1.667e+07	7.26696e+06	High	Peak Found
High	Q9Y3A2	Probable U3 small nucleolar RNA-associated protein 11 OS=Homo sapiens OX=9606 GN=UTP11 PE=1 SV=2	10	3	3	metabolic process;regulation of biological process	cytoplasm;nucleus	protein binding;RNA binding	UTP11L; UTP11	1		Major pathway of rRNA processing in the nucleolus and cytosol; rRNA modification in the nucleus and cytosol	0.431	0	5.0363e+06	1.5307e+06	High	Peak Found
High	P25205	DNA replication licensing factor MCM3 OS=Homo sapiens OX=9606 GN=MCM3 PE=1 SV=3	57	104	46	metabolic process	cytoplasm;membrane;nucleus	catalytic activity;DNA binding;nucleotide binding;protein binding	MCM3	6	DNA replication; Cell cycle	M/G1 Transition; Assembly of the pre-replicative complex; Unwinding of DNA; Regulation of DNA replication; Activation of ATR in response to replication stress; Activation of the pre-replicative complex; Orc1 removal from chromatin; Removal of licensing factors from origins	0.432	11.27	6.72341e+08	2.89017e+08	High	Peak Found
High	Q14432	cGMP-inhibited 3',5'-cyclic phosphodiesterase A OS=Homo sapiens OX=9606 GN=PDE3A PE=1 SV=3	16	20	15	metabolic process;regulation of biological process;response to stimulus	cytosol;membrane	catalytic activity;metal ion binding;nucleotide binding;protein binding	PDE3A	12	cGMP-PKG signaling pathway; Renin secretion; Purine metabolism; Morphine addiction; cAMP signaling pathway	G alpha (s) signalling events; cGMP effects	0.432	14.91	6.26879e+07	2.40758e+07	High	Peak Found
High	Q13907	Isopentenyl-diphosphate Delta-isomerase 1 OS=Homo sapiens OX=9606 GN=IDI1 PE=1 SV=2	24	7	5	metabolic process;regulation of biological process	cytosol	catalytic activity;metal ion binding	IDI1	10	Terpenoid backbone biosynthesis; Metabolic pathways	Cholesterol biosynthesis; Activation of gene expression by SREBF (SREBP)	0.432	1.21	9.59868e+06	5075075	High	Peak Found
High	P20585	DNA mismatch repair protein Msh3 OS=Homo sapiens OX=9606 GN=MSH3 PE=1 SV=4	4	4	4	cell organization and biogenesis;metabolic process;regulation of biological process;response to stimulus	membrane	catalytic activity;DNA binding;nucleotide binding;protein binding	MSH3	5	Colorectal cancer; Pathways in cancer; Mismatch repair; Platinum drug resistance	Defective Mismatch Repair Associated With MSH3; Defective Mismatch Repair Associated With MSH2; Mismatch repair (MMR) directed by MSH2:MSH3 (MutSbeta)	0.432	19.51	2.75859e+06	1.53318e+06	High	Peak Found
High	Q9H0U3	Magnesium transporter protein 1 OS=Homo sapiens OX=9606 GN=MAGT1 PE=1 SV=1	11	6	3	metabolic process;transport	endoplasmic reticulum;membrane	catalytic activity;transporter activity	MAGT1	X		Asparagine N-linked glycosylation; Neutrophil degranulation; Miscellaneous transport and binding events	0.432	28.25	7.09654e+06	3.0882e+06	High	Peak Found
High	Q15388	Mitochondrial import receptor subunit TOM20 homolog OS=Homo sapiens OX=9606 GN=TOMM20 PE=1 SV=1	26	5	4	cell communication;cell organization and biogenesis;metabolic process;response to stimulus;transport	membrane;mitochondrion	protein binding;transporter activity	TOMM20	1		Ub-specific processing proteases; Mitochondrial protein import; Pink/Parkin Mediated Mitophagy	0.432	28.21	2.79262e+07	1.37674e+07	High	Peak Found
High	P28340	DNA polymerase delta catalytic subunit OS=Homo sapiens OX=9606 GN=POLD1 PE=1 SV=2	21	23	20	cell organization and biogenesis;cellular homeostasis;metabolic process;response to stimulus	cytosol;membrane;nucleus	catalytic activity;DNA binding;metal ion binding;nucleotide binding;protein binding	POLD1	19	Homologous recombination; DNA replication; Purine metabolism; Mismatch repair; Base excision repair; HTLV-I infection; Nucleotide excision repair; Metabolic pathways; Pyrimidine metabolism	Cytosolic iron-sulfur cluster assembly; Mismatch repair (MMR) directed by MSH2:MSH3 (MutSbeta); Mismatch repair (MMR) directed by MSH2:MSH6 (MutSalpha); Gap-filling DNA repair synthesis and ligation in TC-NER; HDR through Homologous Recombination (HRR); Gap-filling DNA repair synthesis and ligation in GG-NER; Dual Incision in GG-NER; Polymerase switching; Termination of translesion DNA synthesis;…	0.433	8.14	5.13491e+07	2.42847e+07	High	Peak Found
High	Q8WXX5	DnaJ homolog subfamily C member 9 OS=Homo sapiens OX=9606 GN=DNAJC9 PE=1 SV=1	55	18	13	regulation of biological process;response to stimulus	cytoplasm;cytosol;membrane;nucleus	protein binding	DNAJC9	10			0.433	27.19	4.33536e+07	1.49611e+07	High	Peak Found	Met-loss [N-Term]
High	Q86SJ2	Amphoterin-induced protein 2 OS=Homo sapiens OX=9606 GN=AMIGO2 PE=1 SV=1	3	2	1	regulation of biological process	membrane;nucleus	protein binding	AMIGO2	12			0.433	0	806339	349418	High	Peak Found
High	P57729	Ras-related protein Rab-38 OS=Homo sapiens OX=9606 GN=RAB38 PE=1 SV=1	13	4	1	cell organization and biogenesis;cellular homeostasis;metabolic process;regulation of biological process;response to stimulus;transport	cytoplasm;cytosol;endoplasmic reticulum;endosome;Golgi;membrane;mitochondrion;organelle lumen;vacuole	catalytic activity;nucleotide binding;protein binding	RAB38	11		RAB GEFs exchange GTP for GDP on RABs; RAB geranylgeranylation	0.434	89.11	7.22291e+06	4.44621e+06	High	Peak Found
High	P53814	Smoothelin OS=Homo sapiens OX=9606 GN=SMTN PE=1 SV=7	2	2	2		cytoplasm;cytoskeleton	protein binding;structural molecule activity	SMTN	22			0.434	34.39	670159	304751	High	Peak Found
High	Q9BUB5	MAP kinase-interacting serine/threonine-protein kinase 1 OS=Homo sapiens OX=9606 GN=MKNK1 PE=1 SV=1	3	1	1	metabolic process;regulation of biological process;response to stimulus	cytoplasm;cytosol;nucleus	catalytic activity;metal ion binding;nucleotide binding;protein binding	MKNK1	1	Insulin signaling pathway; HIF-1 signaling pathway; MAPK signaling pathway	Spry regulation of FGF signaling	0.434	0	589535	256103	High	Peak Found
Medium	A0A0A6YYB9	Golgi apparatus membrane protein TVP23 homolog OS=Homo sapiens OX=9606 GN=TVP23C-CDRT4 PE=1 SV=1	5	1	1	transport	membrane		FAM18B2-CDRT4; TVP23C-CDRT4; FAM18B2; TVP23C	17			0.434	0	1.26264e+06	548367	High	Peak Found
High	O75746	Calcium-binding mitochondrial carrier protein Aralar1 OS=Homo sapiens OX=9606 GN=SLC25A12 PE=1 SV=2	16	8	5	metabolic process;response to stimulus;transport	membrane;mitochondrion	metal ion binding;transporter activity	SLC25A12	2		Gluconeogenesis; Mitochondrial protein import; Metabolism of proteins	0.435	13.39	9.8559e+06	8.31533e+06	High	Peak Found
High	Q9UPY5	Cystine/glutamate transporter OS=Homo sapiens OX=9606 GN=SLC7A11 PE=1 SV=1	5	5	3	cell differentiation;cellular component movement;response to stimulus;transport	cell surface;cytoskeleton;endoplasmic reticulum;membrane	protein binding;transporter activity	SLC7A11	4		Basigin interactions; Amino acid transport across the plasma membrane	0.435	27.53	1.58494e+07	7.5876e+06	High	Peak Found	Met-loss [N-Term]
High	Q14119	Vascular endothelial zinc finger 1 OS=Homo sapiens OX=9606 GN=VEZF1 PE=1 SV=2	3	2	1	defense response;metabolic process;regulation of biological process;response to stimulus	nucleus	DNA binding;metal ion binding;protein binding	VEZF1	17			0.435	28.3	2.7444e+06	1.25677e+06	High	Peak Found
High	O95391	Pre-mRNA-splicing factor SLU7 OS=Homo sapiens OX=9606 GN=SLU7 PE=1 SV=2	3	2	2	cell organization and biogenesis;metabolic process;response to stimulus;transport	cytoplasm;cytosol;membrane;nucleus;spliceosomal complex	catalytic activity;metal ion binding;protein binding;RNA binding	SLU7	5	Spliceosome	Cleavage of Growing Transcript in the Termination Region ; Transport of Mature mRNA derived from an Intron-Containing Transcript; mRNA 3'-end processing; mRNA Splicing - Major Pathway	0.435	0	2.86532e+06	554503	High	Peak Found
High	Q9UGU0	Transcription factor 20 OS=Homo sapiens OX=9606 GN=TCF20 PE=1 SV=3	1	2	2	metabolic process;regulation of biological process	nucleus	DNA binding;metal ion binding;RNA binding	TCF20	22; CHR_HSCHR22_4_CTG1; CHR_HSCHR22_5_CTG1; CHR_HSCHR22_6_CTG1; CHR_HSCHR22_7_CTG1; CHR_HSCHR22_8_CTG1; CHR_HSCHR22_1_CTG1; CHR_HSCHR22_3_CTG1			0.435	0	278280	121073	High	Peak Found
High	Q8NB50	Zinc finger protein 62 homolog OS=Homo sapiens OX=9606 GN=ZFP62 PE=1 SV=3	3	3	1	metabolic process;regulation of biological process	nucleus	metal ion binding	ZFP62	5			0.435	2.73	19144353	8.46951e+06	High	Peak Found
High	P49736	DNA replication licensing factor MCM2 OS=Homo sapiens OX=9606 GN=MCM2 PE=1 SV=4	44	77	36	cell death;cell organization and biogenesis;metabolic process;response to stimulus	chromosome;cytoplasm;cytoskeleton;cytosol;nucleus	catalytic activity;DNA binding;metal ion binding;nucleotide binding;protein binding	MCM2	3	DNA replication; Cell cycle	M/G1 Transition; Assembly of the pre-replicative complex; Unwinding of DNA; Regulation of DNA replication; Activation of ATR in response to replication stress; Activation of the pre-replicative complex; Orc1 removal from chromatin; Removal of licensing factors from origins	0.436	9.06	3.68183e+08	1.58715e+08	High	Peak Found
High	Q9GZS1	DNA-directed RNA polymerase I subunit RPA49 OS=Homo sapiens OX=9606 GN=POLR1E PE=1 SV=3	11	7	5								0.436	1.81	1.69366e+07	2.76129e+07	High	Peak Found
High	Q14566	DNA replication licensing factor MCM6 OS=Homo sapiens OX=9606 GN=MCM6 PE=1 SV=1	46	80	35	metabolic process	nucleus	catalytic activity;DNA binding;nucleotide binding;protein binding	MCM6	2	DNA replication; Cell cycle	M/G1 Transition; Assembly of the pre-replicative complex; Unwinding of DNA; Regulation of DNA replication; Activation of ATR in response to replication stress; Activation of the pre-replicative complex; Orc1 removal from chromatin; Removal of licensing factors from origins	0.437	9.74	3.70362e+08	1.71651e+08	High	Peak Found
High	Q96A57	Transmembrane protein 230 OS=Homo sapiens OX=9606 GN=TMEM230 PE=1 SV=1	9	1	1	transport	endoplasmic reticulum;endosome;Golgi;membrane;vacuole		TMEM230	20			0.437	0	2.26016e+06	987663	High	Peak Found
High	Q9BZX2	Uridine-cytidine kinase 2 OS=Homo sapiens OX=9606 GN=UCK2 PE=1 SV=1	37	15	9	metabolic process	cytosol	catalytic activity;nucleotide binding	UCK2	1	Metabolic pathways; Pyrimidine metabolism; Drug metabolism - other enzymes	Pyrimidine salvage	0.438	12.14	3.27353e+07	1.30674e+07	High	Peak Found
High	P61769	Beta-2-microglobulin OS=Homo sapiens OX=9606 GN=B2M PE=1 SV=1	34	12	6	cell differentiation;defense response;metabolic process;regulation of biological process;response to stimulus;transport	cell surface;cytosol;extracellular;Golgi;membrane;organelle lumen	protein binding	B2M	15; CHR_HSCHR15_3_CTG8	Antigen processing and presentation	DAP12 signaling; Neutrophil degranulation; Endosomal/Vacuolar pathway; Immunoregulatory interactions between a Lymphoid and a non-Lymphoid cell; Interferon gamma signaling; Amyloid fiber formation; Antigen Presentation: Folding, assembly and peptide loading of class I MHC; ER-Phagosome pathway; Nef mediated downregulation of MHC class I complex cell surface expression	0.438	6.36	373945427	1.67173e+08	High	Peak Found
High	O14497	AT-rich interactive domain-containing protein 1A OS=Homo sapiens OX=9606 GN=ARID1A PE=1 SV=3	2	4	4	cell differentiation;cell organization and biogenesis;metabolic process;regulation of biological process;response to stimulus;transport	nucleus	DNA binding;protein binding	ARID1A	1		RUNX1 interacts with co-factors whose precise effect on RUNX1 targets is not known; RMTs methylate histone arginines	0.438	4.44	5.63769e+06	1.1108e+06	High	Peak Found
High	O43159	Ribosomal RNA-processing protein 8 OS=Homo sapiens OX=9606 GN=RRP8 PE=1 SV=2	7	4	2	cell communication;cell organization and biogenesis;metabolic process;regulation of biological process;response to stimulus	cytosol;membrane;nucleus	catalytic activity;protein binding;RNA binding	RRP8	11		SIRT1 negatively regulates rRNA expression	0.438	17.64	4.42254e+06	1.98151e+06	High	Peak Found
Medium	Q9H840	Gem-associated protein 7 OS=Homo sapiens OX=9606 GN=GEMIN7 PE=1 SV=1	5	1	1	cell organization and biogenesis;metabolic process;transport	cytoplasm;cytosol;nucleus	protein binding	GEMIN7	19	RNA transport	snRNP Assembly	0.438	0	8.0169e+06	3.51496e+06	High	Peak Found
High	O60306	RNA helicase aquarius OS=Homo sapiens OX=9606 GN=AQR PE=1 SV=4	6	7	7	metabolic process;response to stimulus	membrane;nucleus;spliceosomal complex	catalytic activity;DNA binding;nucleotide binding;protein binding;RNA binding	AQR	15	Spliceosome	Dual incision in TC-NER; Formation of TC-NER Pre-Incision Complex; mRNA Splicing - Major Pathway; Gap-filling DNA repair synthesis and ligation in TC-NER	0.439	16.53	1.21427e+07	1.9773e+06	High	Peak Found
High	Q6DKI1	60S ribosomal protein L7-like 1 OS=Homo sapiens OX=9606 GN=RPL7L1 PE=1 SV=2	10	2	2								0.439	0	754701	331026	High	Peak Found
High	Q9Y324	rRNA-processing protein FCF1 homolog OS=Homo sapiens OX=9606 GN=FCF1 PE=2 SV=1	11	3	3	metabolic process	nucleus	RNA binding	FCF1	14	Ribosome biogenesis in eukaryotes	Major pathway of rRNA processing in the nucleolus and cytosol; rRNA modification in the nucleus and cytosol	0.439	48.23	4.85423e+06	2.1431e+06	High	Peak Found
High	Q8NI60	Atypical kinase COQ8A, mitochondrial OS=Homo sapiens OX=9606 GN=COQ8A PE=1 SV=1	2	1	1	metabolic process	membrane;mitochondrion	catalytic activity;nucleotide binding;protein binding	ADCK3; COQ8A	1			0.439	0	1.31185e+06	575997	High	Peak Found
High	Q9UJS0	Calcium-binding mitochondrial carrier protein Aralar2 OS=Homo sapiens OX=9606 GN=SLC25A13 PE=1 SV=2	28	17	9	metabolic process;response to stimulus;transport	membrane;mitochondrion	metal ion binding;transporter activity	SLC25A13	7		Gluconeogenesis; Mitochondrial protein import; Metabolism of proteins	0.44	8.38	5.3253e+07	2.68912e+07	High	Peak Found
High	P12268	Inosine-5'-monophosphate dehydrogenase 2 OS=Homo sapiens OX=9606 GN=IMPDH2 PE=1 SV=2	67	96	27	cell organization and biogenesis;cell proliferation;metabolic process;response to stimulus;transport	cytoplasm;cytosol;extracellular;membrane;nucleus;organelle lumen	catalytic activity;DNA binding;metal ion binding;nucleotide binding;protein binding;RNA binding	IMPDH2	3	Purine metabolism; Metabolic pathways; Drug metabolism - other enzymes	Neutrophil degranulation; Purine ribonucleoside monophosphate biosynthesis	0.441	13.82	8.41256e+08	372189474	High	Peak Found
High	Q9NZW5	MAGUK p55 subfamily member 6 OS=Homo sapiens OX=9606 GN=MPP6 PE=1 SV=2	16	8	7	cell organization and biogenesis	membrane	protein binding	MPP6	7			0.441	15.01	1.3373e+07	5.60046e+06	High	Peak Found
High	O15427	Monocarboxylate transporter 4 OS=Homo sapiens OX=9606 GN=SLC16A3 PE=1 SV=1	11	12	4	cellular component movement;metabolic process;transport	membrane	protein binding;RNA binding;transporter activity	SLC16A3	17	Central carbon metabolism in cancer	Proton-coupled monocarboxylate transport; Basigin interactions; Pyruvate metabolism	0.441	9.16	1.24369e+08	6.12466e+07	High	Peak Found	Met-loss [N-Term]
High	Q8IV38	Ankyrin repeat and MYND domain-containing protein 2 OS=Homo sapiens OX=9606 GN=ANKMY2 PE=1 SV=1	8	2	2	regulation of biological process		metal ion binding;protein binding	ANKMY2	7			0.441	0	1.16089e+06	368439	High	Peak Found
High	Q8N201	Integrator complex subunit 1 OS=Homo sapiens OX=9606 GN=INTS1 PE=1 SV=2	2	6	5	metabolic process	membrane;nucleus		INTS1	7		RNA polymerase II transcribes snRNA genes	0.441	56.21	1.34041e+07	1.53109e+06	High	Peak Found
High	Q96GD4	Aurora kinase B OS=Homo sapiens OX=9606 GN=AURKB PE=1 SV=3	7	3	2	cell division;cell organization and biogenesis;cell proliferation;metabolic process;regulation of biological process;response to stimulus	chromosome;cytoplasm;cytoskeleton;cytosol;nucleus	catalytic activity;metal ion binding;nucleotide binding;protein binding	AURKB	17		APC/C:Cdh1 mediated degradation of Cdc20 and other APC/C:Cdh1 targeted proteins in late mitosis/early G1; SUMOylation of DNA replication proteins; Amplification of signal from unattached kinetochores via a MAD2 inhibitory signal; Separation of Sister Chromatids; Resolution of Sister Chromatid Cohesion; RHO GTPases Activate Formins; Regulation of TP53 Activity through Phosphorylation	0.441	0	2.63489e+06	960863	High	Peak Found
High	Q9BTE6	Alanyl-tRNA editing protein Aarsd1 OS=Homo sapiens OX=9606 GN=AARSD1 PE=1 SV=2	24	12	8	metabolic process;regulation of biological process	cytoplasm;nucleus	catalytic activity;metal ion binding;nucleotide binding;protein binding	AARSD1; PTGES3L-AARSD1	17			0.442	8.75	2.98078e+07	11627109	High	Peak Found
High	Q9H6Y2	WD repeat-containing protein 55 OS=Homo sapiens OX=9606 GN=WDR55 PE=1 SV=2	9	2	2	metabolic process	cytoplasm;nucleus	protein binding	WDR55	5			0.442	7.59	2.53355e+06	1119964	High	Peak Found
High	Q96LL9	DnaJ homolog subfamily C member 30, mitochondrial OS=Homo sapiens OX=9606 GN=DNAJC30 PE=1 SV=3	8	2	2		cytosol;mitochondrion		DNAJC30	7			0.442	10.29	4.11734e+06	1.7603e+06	High	Peak Found
High	Q9Y6E2	Basic leucine zipper and W2 domain-containing protein 2 OS=Homo sapiens OX=9606 GN=BZW2 PE=1 SV=1	34	25	14	cell differentiation;development	cytoplasm;membrane	protein binding	BZW2	7			0.443	11.81	1.31542e+08	5.35164e+07	High	Peak Found
High	P07996	Thrombospondin-1 OS=Homo sapiens OX=9606 GN=THBS1 PE=1 SV=2	11	19	13	cell organization and biogenesis;cellular component movement;defense response;metabolic process;regulation of biological process;response to stimulus;transport	cell surface;cytoplasm;endoplasmic reticulum;extracellular;organelle lumen	metal ion binding;protein binding	THBS1	15	TGF-beta signaling pathway; MicroRNAs in cancer; Rap1 signaling pathway; Phagosome; Focal adhesion; Malaria; Proteoglycans in cancer; p53 signaling pathway; Bladder cancer; ECM-receptor interaction; PI3K-Akt signaling pathway	Platelet degranulation ; Integrin cell surface interactions; RUNX1 regulates genes involved in megakaryocyte differentiation and platelet function; Defective B3GALTL causes Peters-plus syndrome (PpS); O-glycosylation of TSR domain-containing proteins; Signaling by PDGF; Syndecan interactions	0.443	21.31	4.56973e+07	1.83157e+07	High	Peak Found
High	Q31612	HLA class I histocompatibility antigen, B-73 alpha chain OS=Homo sapiens OX=9606 GN=HLA-B PE=1 SV=1	24	21	3	regulation of biological process;response to stimulus	cell surface;endoplasmic reticulum;Golgi;membrane	protein binding	HLA-B	6		Interferon alpha/beta signaling; ER-Phagosome pathway; Immunoregulatory interactions between a Lymphoid and a non-Lymphoid cell; Endosomal/Vacuolar pathway; Interferon gamma signaling; Antigen Presentation: Folding, assembly and peptide loading of class I MHC	0.443	38.96	2.16182e+07	8.15065e+06	High	Peak Found
High	Q8N543	Prolyl 3-hydroxylase OGFOD1 OS=Homo sapiens OX=9606 GN=OGFOD1 PE=1 SV=1	7	5	4	cell organization and biogenesis;cell proliferation;metabolic process;regulation of biological process	cytoplasm;cytosol;nucleus	catalytic activity;metal ion binding	OGFOD1	16			0.443	4.29	9.38392e+06	4.3095e+06	High	Peak Found
High	P33121	Long-chain-fatty-acid--CoA ligase 1 OS=Homo sapiens OX=9606 GN=ACSL1 PE=1 SV=1	4	4	3	metabolic process;regulation of biological process;response to stimulus;transport	endoplasmic reticulum;membrane;mitochondrion	catalytic activity;nucleotide binding	ACSL1	4	Peroxisome; Fatty acid degradation; PPAR signaling pathway; Fatty acid biosynthesis; Metabolic pathways; Adipocytokine signaling pathway; Fatty acid metabolism	Synthesis of very long-chain fatty acyl-CoAs; PPARA activates gene expression; Linoleic acid (LA) metabolism; alpha-linolenic acid (ALA) metabolism	0.443	103.12	4.56016e+06	2085658	High	Peak Found
High	Q96EY4	Translation machinery-associated protein 16 OS=Homo sapiens OX=9606 GN=TMA16 PE=1 SV=2	13	2	2		nucleus;ribosome	protein binding	TMA16	4			0.443	0	2673077	1.88347e+06	High	Peak Found
High	Q6PL24	Protein TMED8 OS=Homo sapiens OX=9606 GN=TMED8 PE=1 SV=1	5	1	1	transport			TMED8	14			0.443	0	1.34957e+06	598461	High	Peak Found
High	Q9NRP4	Succinate dehydrogenase assembly factor 3, mitochondrial OS=Homo sapiens OX=9606 GN=SDHAF3 PE=1 SV=1	7	1	1	cell organization and biogenesis;metabolic process;regulation of biological process;response to stimulus	mitochondrion;organelle lumen		ACN9; SDHAF3	7			0.443	0	1510607	669915	High	Peak Found
Medium	O60637	Tetraspanin-3 OS=Homo sapiens OX=9606 GN=TSPAN3 PE=2 SV=1	3	3	1	regulation of biological process;response to stimulus	membrane		TSPAN3	15			0.443	0	98718152	43763576	High	Peak Found
Medium	O95696	Bromodomain-containing protein 1 OS=Homo sapiens OX=9606 GN=BRD1 PE=1 SV=1	1	1	1	cell organization and biogenesis;metabolic process;response to stimulus	nucleus	metal ion binding;protein binding	BRD1	22		HATs acetylate histones; Regulation of TP53 Activity through Acetylation	0.443	0	832547	368968	High	Peak Found
High	P17900	Ganglioside GM2 activator OS=Homo sapiens OX=9606 GN=GM2A PE=1 SV=4	16	3	2	metabolic process;regulation of biological process;response to stimulus;transport	cytoplasm;extracellular;mitochondrion;organelle lumen;vacuole	catalytic activity;enzyme regulator activity;transporter activity	GM2A	5	Lysosome	Glycosphingolipid metabolism; Neutrophil degranulation	0.444	69.05	2.3403e+06	1.42397e+06	High	Peak Found
Medium	O14802	DNA-directed RNA polymerase III subunit RPC1 OS=Homo sapiens OX=9606 GN=POLR3A PE=1 SV=2	1	1	1	defense response;metabolic process;regulation of biological process;response to stimulus	cytosol;membrane;nucleus	catalytic activity;DNA binding;metal ion binding	POLR3A	10	Epstein-Barr virus infection; Purine metabolism; Cytosolic DNA-sensing pathway; RNA polymerase; Metabolic pathways; Pyrimidine metabolism	RNA Polymerase III Abortive And Retractive Initiation; RNA Polymerase III Transcription Termination; RNA Polymerase III Transcription Initiation From Type 1 Promoter; RNA Polymerase III Transcription Initiation From Type 3 Promoter; Cytosolic sensors of pathogen-associated DNA ; RNA Polymerase III Chain Elongation; RNA Polymerase III Transcription Initiation From Type 2 Promoter	0.444	0	1.09756e+06	487292	High	Peak Found
High	P42166	Lamina-associated polypeptide 2, isoform alpha OS=Homo sapiens OX=9606 GN=TMPO PE=1 SV=2	41	48	22	regulation of biological process	chromosome;nucleus	DNA binding;protein binding	TMPO	12			0.445	24.82	1.64309e+08	6.89161e+07	High	Peak Found	Met-loss [N-Term]
High	O75380	NADH dehydrogenase [ubiquinone] iron-sulfur protein 6, mitochondrial OS=Homo sapiens OX=9606 GN=NDUFS6 PE=1 SV=1	53	8	4	cell organization and biogenesis;metabolic process;transport	membrane;mitochondrion	catalytic activity	NDUFS6	5	Huntington's disease; Parkinson's disease; Alzheimer's disease; Oxidative phosphorylation; Non-alcoholic fatty liver disease (NAFLD); Metabolic pathways	Complex I biogenesis	0.445	31.07	1.59865e+07	1.00548e+07	High	Peak Found
High	O60294	tRNA wybutosine-synthesizing protein 4 OS=Homo sapiens OX=9606 GN=LCMT2 PE=1 SV=3	2	1	1	metabolic process	cytoplasm;cytosol	catalytic activity;protein binding	LCMT2	15		Synthesis of wybutosine at G37 of tRNA(Phe)	0.445	0	1.31408e+06	585342	High	Peak Found
High	Q9NYP7	Elongation of very long chain fatty acids protein 5 OS=Homo sapiens OX=9606 GN=ELOVL5 PE=1 SV=1	6	2	2	metabolic process;regulation of biological process	endoplasmic reticulum;membrane	catalytic activity;protein binding	ELOVL5	6	Fatty acid elongation; Biosynthesis of unsaturated fatty acids; Fatty acid metabolism	Synthesis of very long-chain fatty acyl-CoAs; Linoleic acid (LA) metabolism; alpha-linolenic acid (ALA) metabolism	0.445	47.87	3.28985e+06	1.53527e+06	High	Peak Found
Medium	Q6P0Q8	Microtubule-associated serine/threonine-protein kinase 2 OS=Homo sapiens OX=9606 GN=MAST2 PE=1 SV=2	0	1	1	cell differentiation;cell organization and biogenesis;metabolic process;regulation of biological process;response to stimulus	cytoplasm;cytoskeleton;membrane	catalytic activity;metal ion binding;nucleotide binding;protein binding	MAST2	1			0.445	0	818730	364578	High	Peak Found
High	Q9UG63	ATP-binding cassette sub-family F member 2 OS=Homo sapiens OX=9606 GN=ABCF2 PE=1 SV=2	27	27	17	transport	membrane;mitochondrion	catalytic activity;nucleotide binding;transporter activity	ABCF2	7			0.446	13.42	1.03514e+08	4.13624e+07	High	Peak Found
High	P0DN79	Cystathionine beta-synthase-like protein OS=Homo sapiens OX=9606 GN=CBSL PE=1 SV=1	46	39	18	cell communication;metabolic process;response to stimulus	cytoplasm;cytosol;nucleus	catalytic activity;metal ion binding;protein binding	CBS; LOC102724560; CBSL	21	Glycine, serine and threonine metabolism; Biosynthesis of amino acids; Metabolic pathways; Cysteine and methionine metabolism	Metabolism of ingested SeMet, Sec, MeSec into H2Se; Cysteine formation from homocysteine	0.446	17.86	1.83796e+08	8.05577e+07	High	Peak Found	Met-loss [N-Term]
High	Q9UIG0	Tyrosine-protein kinase BAZ1B OS=Homo sapiens OX=9606 GN=BAZ1B PE=1 SV=2	14	27	21	cell organization and biogenesis;metabolic process;regulation of biological process;response to stimulus	chromosome;nucleus	catalytic activity;metal ion binding;nucleotide binding;protein binding	BAZ1B	7		Recruitment and ATM-mediated phosphorylation of repair and signaling proteins at DNA double strand breaks; B-WICH complex positively regulates rRNA expression	0.446	17.54	5.52092e+07	2.73226e+07	High	Peak Found
High	P23258	Tubulin gamma-1 chain OS=Homo sapiens OX=9606 GN=TUBG1 PE=1 SV=2	18	6	5	cell organization and biogenesis;regulation of biological process	chromosome;cytoplasm;cytoskeleton;cytosol;endosome	catalytic activity;nucleotide binding;protein binding;structural molecule activity	TUBG1	17		Regulation of PLK1 Activity at G2/M Transition; AURKA Activation by TPX2; Anchoring of the basal body to the plasma membrane; Recruitment of NuMA to mitotic centrosomes; Loss of Nlp from mitotic centrosomes; Recruitment of mitotic centrosome proteins and complexes	0.446	0.51	2.22548e+07	9.1797e+06	High	Peak Found
High	Q9NRX1	RNA-binding protein PNO1 OS=Homo sapiens OX=9606 GN=PNO1 PE=1 SV=1	23	7	5	metabolic process	cytosol;nucleus	RNA binding	PNO1	2		Major pathway of rRNA processing in the nucleolus and cytosol; rRNA modification in the nucleus and cytosol	0.446	57.02	13297179	4.66104e+06	High	Peak Found
High	Q9Y657	Spindlin-1 OS=Homo sapiens OX=9606 GN=SPIN1 PE=1 SV=3	19	4	4	cell organization and biogenesis;development;metabolic process;regulation of biological process;response to stimulus	cytosol;membrane;nucleus	protein binding	SPIN1	9			0.446	26.15	1.07055e+07	4.04712e+06	High	Peak Found
High	P25490	Transcriptional repressor protein YY1 OS=Homo sapiens OX=9606 GN=YY1 PE=1 SV=2	11	4	4	cell differentiation;cell organization and biogenesis;metabolic process;regulation of biological process;response to stimulus	cytoplasm;nucleus	DNA binding;metal ion binding;protein binding;RNA binding	YY1	14		TFAP2 (AP-2) family regulates transcription of growth factors and their receptors; UCH proteinases; DNA Damage Recognition in GG-NER; Activation of anterior HOX genes in hindbrain development during early embryogenesis	0.446	22.56	5.21471e+06	2.37012e+06	High	Peak Found
High	P07954	Fumarate hydratase, mitochondrial OS=Homo sapiens OX=9606 GN=FH PE=1 SV=3	62	81	28	metabolic process	cytoplasm;mitochondrion;organelle lumen	catalytic activity;protein binding	FH	1	Citrate cycle (TCA cycle); Carbon metabolism; Pyruvate metabolism; Pathways in cancer; Renal cell carcinoma; Metabolic pathways	Citric acid cycle (TCA cycle)	0.447	17.27	4.98524e+08	2.34527e+08	High	Peak Found
High	Q03169	Tumor necrosis factor alpha-induced protein 2 OS=Homo sapiens OX=9606 GN=TNFAIP2 PE=2 SV=2	39	22	19	cell differentiation;development;transport		protein binding	TNFAIP2	14			0.447	14.77	3.74842e+07	1.21004e+07	High	Peak Found
High	O60669	Monocarboxylate transporter 2 OS=Homo sapiens OX=9606 GN=SLC16A7 PE=1 SV=2	9	10	6	transport	membrane	transporter activity	SLC16A7	12		Proton-coupled monocarboxylate transport	0.447	17.21	2.97656e+07	2.36633e+07	High	Peak Found
High	Q15562	Transcriptional enhancer factor TEF-4 OS=Homo sapiens OX=9606 GN=TEAD2 PE=1 SV=2	4	2	2	cell differentiation;cell organization and biogenesis;metabolic process;regulation of biological process;response to stimulus	cytosol;nucleus	DNA binding;protein binding	TEAD2	19	Hippo signaling pathway; Hippo signaling pathway -multiple species	YAP1- and WWTR1 (TAZ)-stimulated gene expression; PPARA activates gene expression; RUNX3 regulates YAP1-mediated transcription	0.447	67.62	4.60987e+06	2.22598e+06	High	Peak Found
High	Q9NQY0	Bridging integrator 3 OS=Homo sapiens OX=9606 GN=BIN3 PE=1 SV=1	5	1	1	cell division;cell growth;cell organization and biogenesis;cellular component movement;regulation of biological process	cytoplasm;cytoskeleton	protein binding	BIN3	8			0.447	0	361705	161541	High	Peak Found
Medium	Q8IX01	SURP and G-patch domain-containing protein 2 OS=Homo sapiens OX=9606 GN=SUGP2 PE=1 SV=2	1	1	1	metabolic process	nucleus	RNA binding	SUGP2	19			0.447	0	1152437	515027	High	Peak Found
High	P35613	Basigin OS=Homo sapiens OX=9606 GN=BSG PE=1 SV=2	36	34	12	cell organization and biogenesis;cellular component movement;metabolic process;regulation of biological process;response to stimulus;transport	membrane;mitochondrion	protein binding;transporter activity	BSG	19		Integrin cell surface interactions; Proton-coupled monocarboxylate transport; Basigin interactions; Degradation of the extracellular matrix; Pyruvate metabolism	0.448	13.95	4.94086e+08	2.28984e+08	High	Peak Found
High	L7N2F9	Uncharacterized protein (Fragment) OS=Homo sapiens OX=9606 PE=4 SV=1	43	14	1	cell organization and biogenesis;transport	membrane	protein binding		17			0.448	0	4.84557e+06	2.16917e+06	High	Peak Found
High	Q69YN2	CWF19-like protein 1 OS=Homo sapiens OX=9606 GN=CWF19L1 PE=1 SV=2	10	6	4			catalytic activity	CWF19L1	10			0.448	23.24	6457922	1.93112e+06	High	Peak Found
High	Q9ULF5	Zinc transporter ZIP10 OS=Homo sapiens OX=9606 GN=SLC39A10 PE=1 SV=2	3	5	3	cellular homeostasis;regulation of biological process;transport	membrane	transporter activity	SLC39A10	2		Zinc influx into cells by the SLC39 gene family	0.448	2.77	8542441	3624507	High	Peak Found
High	Q92990	Glomulin OS=Homo sapiens OX=9606 GN=GLMN PE=1 SV=2	5	3	3	cell differentiation;regulation of biological process	cytoplasm	enzyme regulator activity;protein binding	GLMN	1		Antigen processing: Ubiquitination & Proteasome degradation	0.448	3.95	2.61508e+06	1.15296e+06	High	Peak Found
High	Q9HCN8	Stromal cell-derived factor 2-like protein 1 OS=Homo sapiens OX=9606 GN=SDF2L1 PE=1 SV=2	21	11	6	metabolic process;regulation of biological process;response to stimulus	endoplasmic reticulum;membrane;organelle lumen	catalytic activity;protein binding	SDF2L1	22			0.449	3.48	2.98582e+07	1.3201e+07	High	Peak Found
High	Q7L5N7	Lysophosphatidylcholine acyltransferase 2 OS=Homo sapiens OX=9606 GN=LPCAT2 PE=1 SV=1	10	3	3	cell organization and biogenesis;metabolic process	endoplasmic reticulum;Golgi;membrane	catalytic activity;metal ion binding	LPCAT2	16	Ether lipid metabolism; Glycerophospholipid metabolism; Metabolic pathways	Acyl chain remodelling of PC	0.449	30.74	3.2257e+06	1.82117e+06	High	Peak Found
High	Q8NC96	Adaptin ear-binding coat-associated protein 1 OS=Homo sapiens OX=9606 GN=NECAP1 PE=1 SV=2	10	4	2	cell organization and biogenesis;transport	cytosol;membrane		NECAP1	12		Cargo recognition for clathrin-mediated endocytosis; Golgi Associated Vesicle Biogenesis	0.449	2.55	9.49653e+06	4.31718e+06	High	Peak Found
High	P35241	Radixin OS=Homo sapiens OX=9606 GN=RDX PE=1 SV=1	69	186	32	cell organization and biogenesis;regulation of biological process;response to stimulus	cytoplasm;cytoskeleton;membrane	protein binding;RNA binding	RDX	11	MicroRNAs in cancer; Proteoglycans in cancer; Regulation of actin cytoskeleton	Recycling pathway of L1	0.45	12.02	332052588	1.34043e+08	High	Peak Found
High	P01893	Putative HLA class I histocompatibility antigen, alpha chain H OS=Homo sapiens OX=9606 GN=HLA-H PE=5 SV=3	22	23	1	regulation of biological process;response to stimulus;transport	cell surface;membrane	protein binding	HLA-H	6		Interferon alpha/beta signaling; ER-Phagosome pathway; Neutrophil degranulation; Immunoregulatory interactions between a Lymphoid and a non-Lymphoid cell; Endosomal/Vacuolar pathway; Interferon gamma signaling; Antigen Presentation: Folding, assembly and peptide loading of class I MHC	0.45	56.16	8.35724e+07	3.38421e+07	High	Peak Found
High	Q9BTE3	Mini-chromosome maintenance complex-binding protein OS=Homo sapiens OX=9606 GN=MCMBP PE=1 SV=2	22	16	11	cell division;cell organization and biogenesis;metabolic process	cytosol;membrane;nucleus	protein binding	MCMBP	10			0.45	12.61	3.40661e+07	1.05147e+07	High	Peak Found
High	O00458	Interferon-related developmental regulator 1 OS=Homo sapiens OX=9606 GN=IFRD1 PE=1 SV=4	12	5	3	cell differentiation;development;regulation of biological process	cytoplasm;nucleus		IFRD1	7			0.45	8.43	1.9877e+06	805014	High	Peak Found
High	Q96RL1	BRCA1-A complex subunit RAP80 OS=Homo sapiens OX=9606 GN=UIMC1 PE=1 SV=2	9	6	5	cell organization and biogenesis;metabolic process;regulation of biological process;response to stimulus	nucleus	protein binding	UIMC1	5	Homologous recombination	G2/M DNA damage checkpoint; Recruitment and ATM-mediated phosphorylation of repair and signaling proteins at DNA double strand breaks; Processing of DNA double-strand break ends; Nonhomologous End-Joining (NHEJ); Metalloprotease DUBs	0.45	5.4	4588788	1.48686e+06	High	Peak Found
Low	Q9UJF2	Ras GTPase-activating protein nGAP OS=Homo sapiens OX=9606 GN=RASAL2 PE=1 SV=2	1	1	1	metabolic process;regulation of biological process;response to stimulus	cytoplasm;cytosol	enzyme regulator activity;protein binding	RASAL2	1	Ras signaling pathway	Regulation of RAS by GAPs; Signaling by RAS mutants; Interleukin-20 family signaling	0.45	0	3.18746e+06	1.43538e+06	High	Peak Found
High	Q9BYG3	MKI67 FHA domain-interacting nucleolar phosphoprotein OS=Homo sapiens OX=9606 GN=NIFK PE=1 SV=1	33	8	6	cell organization and biogenesis;metabolic process;regulation of biological process	chromosome;cytoplasm;nucleus	protein binding;RNA binding	MKI67IP; NIFK	2			0.451	34.86	9.46667e+06	2.83816e+06	High	Peak Found
High	Q969G5	Caveolae-associated protein 3 OS=Homo sapiens OX=9606 GN=CAVIN3 PE=1 SV=3	26	6	6	cell organization and biogenesis;regulation of biological process	cytoplasm;cytosol;membrane	protein binding	PRKCDBP; CAVIN3	11			0.451	3.81	2.66553e+07	1.2187e+07	High	Peak Found
High	Q13228	Methanethiol oxidase OS=Homo sapiens OX=9606 GN=SELENBP1 PE=1 SV=2	39	22	14	transport	cytoplasm;cytosol;membrane;nucleus	protein binding	SELENBP1	1			0.452	9.24	6.5957e+07	2.93656e+07	High	Peak Found
High	Q8NFJ5	Retinoic acid-induced protein 3 OS=Homo sapiens OX=9606 GN=GPRC5A PE=1 SV=2	13	11	5	regulation of biological process;response to stimulus	membrane	protein binding;receptor activity;signal transducer activity	GPRC5A	12			0.452	15.03	1.06763e+08	4.80005e+07	High	Peak Found
High	Q96EN8	Molybdenum cofactor sulfurase OS=Homo sapiens OX=9606 GN=MOCOS PE=1 SV=2	6	5	5	metabolic process	cytosol	catalytic activity;metal ion binding;protein binding	MOCOS	18		Molybdenum cofactor biosynthesis	0.452	31.6	4.36412e+06	1.30428e+06	High	Peak Found
High	P49321	Nuclear autoantigenic sperm protein OS=Homo sapiens OX=9606 GN=NASP PE=1 SV=2	46	91	34	cell organization and biogenesis;cell proliferation;metabolic process;response to stimulus;transport	cytoplasm;nucleus	protein binding	NASP	1			0.453	20.68	7.41602e+08	6.56637e+08	High	Peak Found
High	Q14151	Scaffold attachment factor B2 OS=Homo sapiens OX=9606 GN=SAFB2 PE=1 SV=1	23	40	12	cell differentiation;metabolic process;regulation of biological process	cytoplasm;nucleus	DNA binding;protein binding;RNA binding	SAFB2	19			0.453	29.4	3.83838e+07	1.74526e+07	High	Peak Found
High	Q6NZI2	Caveolae-associated protein 1 OS=Homo sapiens OX=9606 GN=CAVIN1 PE=1 SV=1	47	51	19	metabolic process;regulation of biological process	cytoplasm;cytosol;endoplasmic reticulum;membrane;mitochondrion;nucleus	protein binding;RNA binding	PTRF; CAVIN1	17		RNA Polymerase I Transcription Termination	0.453	15.03	3.0819e+08	1.43384e+08	High	Peak Found
High	Q9ULX3	RNA-binding protein NOB1 OS=Homo sapiens OX=9606 GN=NOB1 PE=1 SV=1	11	5	3	metabolic process	cytosol;nucleus	catalytic activity;metal ion binding	NOB1	16	Ribosome biogenesis in eukaryotes	Major pathway of rRNA processing in the nucleolus and cytosol	0.453	4.48	9.13378e+06	3.1596e+06	High	Peak Found	Met-loss [N-Term]
High	Q99757	Thioredoxin, mitochondrial OS=Homo sapiens OX=9606 GN=TXN2 PE=1 SV=2	26	3	2	cell communication;cellular homeostasis;metabolic process;regulation of biological process;response to stimulus;transport	mitochondrion;organelle lumen	catalytic activity;protein binding	TXN2	22	NOD-like receptor signaling pathway	Detoxification of Reactive Oxygen Species	0.453	57.52	7.87347e+06	2.71309e+06	High	Peak Found
High	P48060	Glioma pathogenesis-related protein 1 OS=Homo sapiens OX=9606 GN=GLIPR1 PE=1 SV=3	9	2	2	regulation of biological process;transport	extracellular;membrane		GLIPR1	12		Neutrophil degranulation; PPARA activates gene expression	0.453	0	1831818	542046	High	Peak Found
High	Q53F19	Nuclear cap-binding protein subunit 3 OS=Homo sapiens OX=9606 GN=NCBP3 PE=1 SV=2	3	2	2	defense response;metabolic process;response to stimulus;transport	cytoplasm;nucleus	catalytic activity;metal ion binding;protein binding;RNA binding	C17orf85; NCBP3	17			0.453	0	2032056	673314	High	Peak Found
High	Q14651	Plastin-1 OS=Homo sapiens OX=9606 GN=PLS1 PE=1 SV=2	9	16	1	cell organization and biogenesis;regulation of biological process;transport	cytoplasm;cytoskeleton	metal ion binding;protein binding;structural molecule activity	PLS1	3			0.454	0	1160295	527256	High	Peak Found
High	P53350	Serine/threonine-protein kinase PLK1 OS=Homo sapiens OX=9606 GN=PLK1 PE=1 SV=1	3	2	2	cell division;cell organization and biogenesis;cell proliferation;metabolic process;regulation of biological process;response to stimulus	chromosome;cytoplasm;cytoskeleton;cytosol;nucleus	catalytic activity;metal ion binding;nucleotide binding;protein binding	PLK1	16	FoxO signaling pathway; Progesterone-mediated oocyte maturation; Oocyte meiosis; Cell cycle	Regulation of PLK1 Activity at G2/M Transition; AURKA Activation by TPX2; Anchoring of the basal body to the plasma membrane; Polo-like kinase mediated events; Phosphorylation of Emi1; APC/C:Cdh1 mediated degradation of Cdc20 and other APC/C:Cdh1 targeted proteins in late mitosis/early G1; Recruitment of NuMA to mitotic centrosomes; Loss of Nlp from mitotic centrosomes; Recruitment of mitotic cen…	0.454	0	3.12324e+06	500408	High	Peak Found
High	Q9Y2P8	RNA 3'-terminal phosphate cyclase-like protein OS=Homo sapiens OX=9606 GN=RCL1 PE=1 SV=3	5	2	2	metabolic process	nucleus	catalytic activity	RCL1	9	Ribosome biogenesis in eukaryotes	Major pathway of rRNA processing in the nucleolus and cytosol; rRNA modification in the nucleus and cytosol	0.454	30.71	8.67163e+06	4.45911e+06	High	Peak Found
High	P43246	DNA mismatch repair protein Msh2 OS=Homo sapiens OX=9606 GN=MSH2 PE=1 SV=1	39	39	29	cell differentiation;cell organization and biogenesis;metabolic process;regulation of biological process;response to stimulus	membrane;nucleus	catalytic activity;DNA binding;metal ion binding;nucleotide binding;protein binding	MSH2	2	Colorectal cancer; Pathways in cancer; Mismatch repair; Platinum drug resistance	Defective Mismatch Repair Associated With MSH3; Defective Mismatch Repair Associated With MSH2; Mismatch repair (MMR) directed by MSH2:MSH3 (MutSbeta); Mismatch repair (MMR) directed by MSH2:MSH6 (MutSalpha); TP53 Regulates Transcription of DNA Repair Genes; Defective Mismatch Repair Associated With MSH6	0.455	13.67	1.18406e+08	5.04187e+07	High	Peak Found
Low	Q7Z3Z3	Piwi-like protein 3 OS=Homo sapiens OX=9606 GN=PIWIL3 PE=2 SV=2	1	1	1	cell differentiation;development;regulation of biological process	cytoplasm	protein binding;RNA binding	PIWIL3	22	Dorso-ventral axis formation		0.455	0	364389	165937	High	Peak Found
High	Q6PD62	RNA polymerase-associated protein CTR9 homolog OS=Homo sapiens OX=9606 GN=CTR9 PE=1 SV=1	12	13	11	cell differentiation;cell organization and biogenesis;metabolic process;regulation of biological process;response to stimulus	nucleus	protein binding	CTR9	11		E3 ubiquitin ligases ubiquitinate target proteins; Formation of RNA Pol II elongation complex ; RNA Polymerase II Pre-transcription Events	0.456	16.28	2.93189e+07	1.69113e+07	High	Peak Found
High	G3V325	ATP5MF-PTCD1 readthrough OS=Homo sapiens OX=9606 GN=ATP5MF-PTCD1 PE=4 SV=1	5	4	3				ATP5J2-PTCD1	7			0.456	42.22	9.10838e+06	4.23367e+06	High	Peak Found
High	P50895	Basal cell adhesion molecule OS=Homo sapiens OX=9606 GN=BCAM PE=1 SV=2	3	2	2	regulation of biological process;response to stimulus	cell surface;extracellular;membrane	protein binding;receptor activity;signal transducer activity	BCAM	19			0.456	0	3.35366e+06	934755	High	Peak Found
High	O00762	Ubiquitin-conjugating enzyme E2 C OS=Homo sapiens OX=9606 GN=UBE2C PE=1 SV=1	6	2	2	cell division;cell organization and biogenesis;metabolic process;regulation of biological process;transport	cytoplasm;cytosol;membrane	catalytic activity;nucleotide binding;protein binding	UBE2C	20	Ubiquitin mediated proteolysis	Inactivation of APC/C via direct inhibition of the APC/C complex; APC/C:Cdc20 mediated degradation of Cyclin B; Autodegradation of Cdh1 by Cdh1:APC/C; APC-Cdc20 mediated degradation of Nek2A; APC/C:Cdh1 mediated degradation of Cdc20 and other APC/C:Cdh1 targeted proteins in late mitosis/early G1; Antigen processing: Ubiquitination & Proteasome degradation; Phosphorylation of the APC/C; APC/C:Cdc2…	0.456	10.17	2.61078e+06	1.13204e+06	High	Peak Found
High	P10412	Histone H1.4 OS=Homo sapiens OX=9606 GN=HIST1H1E PE=1 SV=2	60	155	11	cell organization and biogenesis;metabolic process;regulation of biological process	chromosome;nucleus	DNA binding;metal ion binding;nucleotide binding;protein binding;RNA binding	HIST1H1E	6		Formation of Senescence-Associated Heterochromatin Foci (SAHF); Activation of DNA fragmentation factor	0.457	14.29	4.93532e+09	2.27435e+09	High	Peak Found
High	O96000	NADH dehydrogenase [ubiquinone] 1 beta subcomplex subunit 10 OS=Homo sapiens OX=9606 GN=NDUFB10 PE=1 SV=3	47	14	9	cell organization and biogenesis;metabolic process;transport	membrane;mitochondrion	catalytic activity;protein binding	NDUFB10	16	Huntington's disease; Parkinson's disease; Alzheimer's disease; Oxidative phosphorylation; Non-alcoholic fatty liver disease (NAFLD); Metabolic pathways	Complex I biogenesis	0.457	32.08	3.71627e+07	1.60412e+07	High	Peak Found
High	Q96TC7	Regulator of microtubule dynamics protein 3 OS=Homo sapiens OX=9606 GN=RMDN3 PE=1 SV=2	25	10	9	cell death;cell differentiation;cellular homeostasis	cytoplasm;cytoskeleton;membrane;mitochondrion;nucleus	protein binding	FAM82A2; RMDN3	15			0.457	20.87	1.95536e+07	4.93806e+06	High	Peak Found
High	P29034	Protein S100-A2 OS=Homo sapiens OX=9606 GN=S100A2 PE=1 SV=3	28	2	2	cellular component movement		metal ion binding;protein binding	S100A2	1			0.457	58.67	8.41846e+06	4.16652e+06	High	Peak Found
High	Q2PZI1	Probable C-mannosyltransferase DPY19L1 OS=Homo sapiens OX=9606 GN=DPY19L1 PE=2 SV=1	3	1	1	metabolic process	membrane	catalytic activity	DPY19L1	7			0.457	0	1.40868e+06	643757	High	Peak Found
Medium	P11474	Steroid hormone receptor ERR1 OS=Homo sapiens OX=9606 GN=ESRRA PE=1 SV=3	2	1	1	cell organization and biogenesis;metabolic process;regulation of biological process;response to stimulus	cytoskeleton;nucleus	DNA binding;metal ion binding;protein binding;receptor activity;signal transducer activity	ESRRA	11		Regulation of RUNX2 expression and activity; Transcriptional activation of mitochondrial biogenesis; Nuclear Receptor transcription pathway; PPARA activates gene expression	0.457	0	452783	206895	High	Peak Found
High	P16403	Histone H1.2 OS=Homo sapiens OX=9606 GN=HIST1H1C PE=1 SV=2	58	126	11	cell organization and biogenesis;metabolic process;regulation of biological process	chromosome;nucleus	DNA binding;protein binding;RNA binding	HIST1H1C	6		Formation of Senescence-Associated Heterochromatin Foci (SAHF); Activation of DNA fragmentation factor	0.458	8.2	8.65873e+08	3.75489e+08	High	Peak Found
High	Q8IUE6	Histone H2A type 2-B OS=Homo sapiens OX=9606 GN=HIST2H2AB PE=1 SV=3	76	116	2	regulation of biological process	chromosome;nucleus	DNA binding;protein binding	HIST2H2AB	1	Systemic lupus erythematosus; Alcoholism	HDACs deacetylate histones; HATs acetylate histones; UCH proteinases; Ub-specific processing proteases; RMTs methylate histone arginines; Metalloprotease DUBs	0.458	20.67	6.21461e+07	31936525	High	Peak Found
High	Q9NU22	Midasin OS=Homo sapiens OX=9606 GN=MDN1 PE=1 SV=2	1	5	5	cell organization and biogenesis;metabolic process	cytoplasm;cytoskeleton;cytosol;membrane;nucleus	catalytic activity;nucleotide binding;protein binding	MDN1	6	Ribosome biogenesis in eukaryotes		0.458	13.44	7.96095e+06	2.40832e+06	High	Peak Found
High	Q69YN4	Protein virilizer homolog OS=Homo sapiens OX=9606 GN=VIRMA PE=1 SV=2	1	1	1	metabolic process	cytosol;nucleus	RNA binding	KIAA1429; VIRMA	8			0.458	0	504545	231239	High	Peak Found
High	O60725	Protein-S-isoprenylcysteine O-methyltransferase OS=Homo sapiens OX=9606 GN=ICMT PE=1 SV=1	5	3	2	cell organization and biogenesis;metabolic process;transport	endoplasmic reticulum;membrane	catalytic activity	ICMT	1	Terpenoid backbone biosynthesis	Gamma carboxylation, hypusine formation and arylsulfatase activation	0.458	6.23	2.25409e+06	1.04552e+06	High	Peak Found	Met-loss [N-Term]
Medium	Q9Y2G3	Probable phospholipid-transporting ATPase IF OS=Homo sapiens OX=9606 GN=ATP11B PE=1 SV=2	1	1	1	cell organization and biogenesis;transport	endoplasmic reticulum;endosome;Golgi;membrane	catalytic activity;metal ion binding;nucleotide binding;protein binding;transporter activity	ATP11B	3		Neutrophil degranulation; Ion transport by P-type ATPases	0.458	0	250725	114944	High	Peak Found
High	Q5JTV8	Torsin-1A-interacting protein 1 OS=Homo sapiens OX=9606 GN=TOR1AIP1 PE=1 SV=2	25	31	14	cell organization and biogenesis;regulation of biological process	membrane;nucleus	enzyme regulator activity;protein binding	TOR1AIP1	1			0.459	13.85	7.46794e+07	3.35843e+07	High	Peak Found
High	O00411	DNA-directed RNA polymerase, mitochondrial OS=Homo sapiens OX=9606 GN=POLRMT PE=1 SV=2	8	8	8	cell organization and biogenesis;metabolic process	mitochondrion;organelle lumen	catalytic activity;DNA binding;protein binding;RNA binding	POLRMT	19		Mitochondrial transcription initiation; Transcriptional activation of mitochondrial biogenesis	0.459	8.59	9417425	3.83669e+06	High	Peak Found
High	Q9Y6A9	Signal peptidase complex subunit 1 OS=Homo sapiens OX=9606 GN=SPCS1 PE=1 SV=4	17	2	1	metabolic process;transport	endoplasmic reticulum;membrane	catalytic activity;protein binding	SPCS1	3	Protein export	Synthesis, secretion, and inactivation of Glucagon-like Peptide-1 (GLP-1); Synthesis, secretion, and deacylation of Ghrelin; SRP-dependent cotranslational protein targeting to membrane; Synthesis, secretion, and inactivation of Glucose-dependent Insulinotropic Polypeptide (GIP)	0.459	0	6.6602e+06	3.05762e+06	High	Peak Found
High	Q9NVI7	ATPase family AAA domain-containing protein 3A OS=Homo sapiens OX=9606 GN=ATAD3A PE=1 SV=2	51	95	11	cell growth;regulation of biological process	membrane;mitochondrion	catalytic activity;nucleotide binding;RNA binding	ATAD3A	1			0.46	13.34	7.0153e+08	3.20932e+08	High	Peak Found
High	P67812	Signal peptidase complex catalytic subunit SEC11A OS=Homo sapiens OX=9606 GN=SEC11A PE=1 SV=1	22	12	5	metabolic process	endoplasmic reticulum;membrane	catalytic activity	SEC11A	15	Protein export	Synthesis, secretion, and inactivation of Glucagon-like Peptide-1 (GLP-1); Synthesis, secretion, and deacylation of Ghrelin; SRP-dependent cotranslational protein targeting to membrane; Synthesis, secretion, and inactivation of Glucose-dependent Insulinotropic Polypeptide (GIP)	0.46	18.83	4.23019e+07	19883743	High	Peak Found
High	Q8NI35	InaD-like protein OS=Homo sapiens OX=9606 GN=PATJ PE=1 SV=3	1	7	2	cell organization and biogenesis;regulation of biological process;response to stimulus	cytoplasm;cytosol;membrane	protein binding	INADL; PATJ	1	Tight junction; Hippo signaling pathway	Tight junction interactions	0.46	86.45	9.02642e+07	2.76973e+07	High	Peak Found
High	Q6PKG0	La-related protein 1 OS=Homo sapiens OX=9606 GN=LARP1 PE=1 SV=2	23	36	24	cell proliferation;metabolic process;regulation of biological process;response to stimulus	cytoplasm;membrane	protein binding;RNA binding;translation regulator activity	LARP1	5			0.461	22.18	1.06676e+08	5.11053e+07	High	Peak Found
High	P40937	Replication factor C subunit 5 OS=Homo sapiens OX=9606 GN=RFC5 PE=1 SV=1	45	14	12	cell organization and biogenesis;cellular homeostasis;metabolic process;regulation of biological process;response to stimulus	nucleus	catalytic activity;DNA binding;nucleotide binding;protein binding	RFC5	12	DNA replication; Mismatch repair; Nucleotide excision repair	Translesion Synthesis by POLH; Termination of translesion DNA synthesis; Translesion synthesis by POLI; Recognition of DNA damage by PCNA-containing replication complex; Translesion synthesis by REV1; Polymerase switching on the C-strand of the telomere; Regulation of TP53 Activity through Phosphorylation; PCNA-Dependent Long Patch Base Excision Repair; G2/M DNA damage checkpoint; Translesion syn…	0.461	43.03	2.73157e+07	9.00911e+06	High	Peak Found
High	P36639	7,8-dihydro-8-oxoguanine triphosphatase OS=Homo sapiens OX=9606 GN=NUDT1 PE=1 SV=3	36	14	9	cell communication;metabolic process;response to stimulus	cytoplasm;cytosol;membrane;mitochondrion;nucleus;organelle lumen	catalytic activity;metal ion binding;protein binding;RNA binding	NUDT1	7		Phosphate bond hydrolysis by NUDT proteins	0.461	6.88	4.22894e+07	1.70315e+07	High	Peak Found
High	Q8WUA4	General transcription factor 3C polypeptide 2 OS=Homo sapiens OX=9606 GN=GTF3C2 PE=1 SV=2	5	4	4	metabolic process	nucleus	DNA binding;protein binding	GTF3C2	2		RNA Polymerase III Abortive And Retractive Initiation; RNA Polymerase III Transcription Initiation From Type 1 Promoter; RNA Polymerase III Transcription Initiation From Type 2 Promoter	0.461	25.33	4.23503e+06	2.64086e+06	High	Peak Found
High	P10746	Uroporphyrinogen-III synthase OS=Homo sapiens OX=9606 GN=UROS PE=1 SV=1	8	2	2	metabolic process;response to stimulus	cytosol;mitochondrion	catalytic activity	UROS	10	Porphyrin and chlorophyll metabolism; Metabolic pathways	Heme biosynthesis	0.461	35.78	4.83223e+06	1.91961e+06	High	Peak Found
High	Q08380	Galectin-3-binding protein OS=Homo sapiens OX=9606 GN=LGALS3BP PE=1 SV=1	29	33	14	defense response;regulation of biological process;response to stimulus;transport	extracellular;membrane;organelle lumen	protein binding;receptor activity	LGALS3BP	17		Platelet degranulation	0.462	8.74	1.36309e+08	6.18617e+07	High	Peak Found
High	P26440	Isovaleryl-CoA dehydrogenase, mitochondrial OS=Homo sapiens OX=9606 GN=IVD PE=1 SV=2	38	20	14								0.462	18.89	6.63143e+07	2.7882e+07	High	Peak Found
High	Q8WVK2	U4/U6.U5 small nuclear ribonucleoprotein 27 kDa protein OS=Homo sapiens OX=9606 GN=SNRNP27 PE=1 SV=1	12	2	1	metabolic process	nucleus	protein binding	SNRNP27	2	Spliceosome	mRNA Splicing - Major Pathway	0.462	0	1.23281e+06	569936	High	Peak Found
High	O43865	S-adenosylhomocysteine hydrolase-like protein 1 OS=Homo sapiens OX=9606 GN=AHCYL1 PE=1 SV=2	43	39	10	metabolic process;regulation of biological process;response to stimulus;transport	cytoplasm;cytosol;endoplasmic reticulum;membrane	catalytic activity;nucleotide binding;protein binding;RNA binding	AHCYL1	1	Metabolic pathways; Cysteine and methionine metabolism	Ion homeostasis; FCERI mediated Ca+2 mobilization; PLC beta mediated events; DAG and IP3 signaling; Signaling by GPCR; Regulation of insulin secretion; VEGFR2 mediated cell proliferation; CLEC7A (Dectin-1) induces NFAT activation; Antigen activates B Cell Receptor (BCR) leading to generation of second messengers; Role of phospholipids in phagocytosis	0.463	24.53	1.71712e+08	1.19638e+08	High	Peak Found
High	Q9BVP2	Guanine nucleotide-binding protein-like 3 OS=Homo sapiens OX=9606 GN=GNL3 PE=1 SV=2	44	27	20	cell division;cell proliferation;regulation of biological process	membrane;nucleus	catalytic activity;nucleotide binding;protein binding;RNA binding	GNL3	3	Ribosome biogenesis in eukaryotes	Major pathway of rRNA processing in the nucleolus and cytosol	0.464	26.01	4.87636e+07	2.79901e+07	High	Peak Found
High	Q9HB40	Retinoid-inducible serine carboxypeptidase OS=Homo sapiens OX=9606 GN=SCPEP1 PE=1 SV=1	24	18	9	metabolic process	cytosol;extracellular	catalytic activity	SCPEP1	17			0.464	9.83	3.76237e+07	1.56812e+07	High	Peak Found
High	Q8IXI1	Mitochondrial Rho GTPase 2 OS=Homo sapiens OX=9606 GN=RHOT2 PE=1 SV=2	24	14	8	cell organization and biogenesis;cellular component movement;cellular homeostasis;regulation of biological process;response to stimulus;transport	cytosol;membrane;mitochondrion	catalytic activity;metal ion binding;nucleotide binding;protein binding	RHOT2	16		Rho GTPase cycle	0.464	12.03	1.95104e+07	7.07047e+06	High	Peak Found
High	O60885	Bromodomain-containing protein 4 OS=Homo sapiens OX=9606 GN=BRD4 PE=1 SV=2	6	10	4	cell organization and biogenesis;metabolic process;regulation of biological process;response to stimulus	chromosome;cytosol;nucleus	protein binding	BRD4	19			0.464	36.43	2.62694e+07	1.19958e+07	High	Peak Found
High	Q96HN2	Adenosylhomocysteinase 3 OS=Homo sapiens OX=9606 GN=AHCYL2 PE=1 SV=1	21	24	1	metabolic process;transport	cytoplasm;cytosol;endoplasmic reticulum	catalytic activity;nucleotide binding;protein binding	AHCYL2	7	Metabolic pathways; Cysteine and methionine metabolism	Bicarbonate transporters	0.465	0	522390	242774	High	Peak Found
High	Q12824	SWI/SNF-related matrix-associated actin-dependent regulator of chromatin subfamily B member 1 OS=Homo sapiens OX=9606 GN=SMARCB1 PE=1 SV=2	16	8	5	cell differentiation;cell organization and biogenesis;metabolic process;regulation of biological process;response to stimulus	chromosome;nucleus	DNA binding;protein binding	SMARCB1	22; CHR_HSCHR22_1_CTG7		RUNX1 interacts with co-factors whose precise effect on RUNX1 targets is not known; RMTs methylate histone arginines	0.465	12.1	1.41646e+07	6.71507e+06	High	Peak Found
High	Q9Y6H1	Coiled-coil-helix-coiled-coil-helix domain-containing protein 2 OS=Homo sapiens OX=9606 GN=CHCHD2 PE=1 SV=1	34	4	3	cell organization and biogenesis;metabolic process;regulation of biological process	mitochondrion;nucleus	DNA binding;protein binding	CHCHD2	7		Mitochondrial protein import; Metabolism of proteins	0.465	18.52	5.74878e+06	2.73541e+06	High	Peak Found
High	Q96R06	Sperm-associated antigen 5 OS=Homo sapiens OX=9606 GN=SPAG5 PE=1 SV=2	5	5	4	cell division;cell organization and biogenesis;regulation of biological process	chromosome;cytoplasm;cytoskeleton	protein binding	SPAG5	17			0.465	0	2.31262e+06	162795	High	Peak Found
High	Q9BPZ3	Polyadenylate-binding protein-interacting protein 2 OS=Homo sapiens OX=9606 GN=PAIP2 PE=1 SV=1	35	4	3	regulation of biological process;response to stimulus	cytoplasm	protein binding;RNA binding;translation regulator activity	PAIP2	5			0.465	38.39	3.34478e+07	1.40289e+07	High	Peak Found
High	Q92547	DNA topoisomerase 2-binding protein 1 OS=Homo sapiens OX=9606 GN=TOPBP1 PE=1 SV=3	2	2	2	metabolic process;regulation of biological process;response to stimulus	chromosome;cytoplasm;cytoskeleton;nucleus	DNA binding;protein binding	TOPBP1	3	Homologous recombination	G2/M DNA damage checkpoint; Presynaptic phase of homologous DNA pairing and strand exchange; Processing of DNA double-strand break ends; HDR through Single Strand Annealing (SSA); Regulation of TP53 Activity through Phosphorylation	0.465	12.47	894405	433158	High	Peak Found
Low	Q9P275	Ubiquitin carboxyl-terminal hydrolase 36 OS=Homo sapiens OX=9606 GN=USP36 PE=1 SV=4	1	1	1								0.465	0	411798	191481	High	Peak Found
High	Q9P2B2	Prostaglandin F2 receptor negative regulator OS=Homo sapiens OX=9606 GN=PTGFRN PE=1 SV=2	24	38	23	cell organization and biogenesis	cell surface;endoplasmic reticulum;Golgi;membrane	protein binding	PTGFRN	1			0.466	15.92	2.19626e+08	1.38696e+08	High	Peak Found
High	P54289	Voltage-dependent calcium channel subunit alpha-2/delta-1 OS=Homo sapiens OX=9606 GN=CACNA2D1 PE=1 SV=3	14	17	12	cellular homeostasis;regulation of biological process;transport	endoplasmic reticulum;membrane	metal ion binding;transporter activity	CACNA2D1	7	Arrhythmogenic right ventricular cardiomyopathy (ARVC); Dilated cardiomyopathy; MAPK signaling pathway; Oxytocin signaling pathway; Adrenergic signaling in cardiomyocytes; Cardiac muscle contraction; Hypertrophic cardiomyopathy (HCM)	Phase 0 - rapid depolarisation; Phase 2 - plateau phase	0.466	9.86	6.66003e+07	2.6939e+07	High	Peak Found
High	P54105	Methylosome subunit pICln OS=Homo sapiens OX=9606 GN=CLNS1A PE=1 SV=1	19	11	3	cell organization and biogenesis;cellular homeostasis;transport	cytoplasm;cytoskeleton;cytosol;membrane;nucleus	protein binding;RNA binding	CLNS1A	11	RNA transport	snRNP Assembly	0.466	24.87	3.59095e+07	17622702	High	Peak Found
High	Q9UJK0	Ribosome biogenesis protein TSR3 homolog OS=Homo sapiens OX=9606 GN=TSR3 PE=1 SV=1	6	3	2	metabolic process	cytosol	catalytic activity	TSR3	16		rRNA modification in the nucleus and cytosol	0.466	8.07	4.49165e+06	2.06478e+06	High	Peak Found
High	Q9NQS1	Cell death regulator Aven OS=Homo sapiens OX=9606 GN=AVEN PE=1 SV=1	3	1	1	cell death;regulation of biological process	membrane	protein binding	AVEN	15			0.466	0	1.78009e+06	829981	High	Peak Found
High	Q00796	Sorbitol dehydrogenase OS=Homo sapiens OX=9606 GN=SORD PE=1 SV=4	65	51	20	cellular component movement;metabolic process;response to stimulus	cytosol;membrane;mitochondrion	catalytic activity;metal ion binding;nucleotide binding;protein binding	SORD	15	Fructose and mannose metabolism; Pentose and glucuronate interconversions; Metabolic pathways	Catabolism of glucuronate to xylulose-5-phosphate; Fructose biosynthesis	0.467	15.93	3.15539e+08	1.55593e+08	High	Peak Found	Met-loss+Acetyl [N-Term]
High	Q96E11	Ribosome-recycling factor, mitochondrial OS=Homo sapiens OX=9606 GN=MRRF PE=1 SV=1	43	19	10	cell organization and biogenesis;metabolic process	mitochondrion;organelle lumen		MRRF	9		Mitochondrial translation termination	0.467	10.43	7.87719e+07	3.36599e+07	High	Peak Found
High	P28288	ATP-binding cassette sub-family D member 3 OS=Homo sapiens OX=9606 GN=ABCD3 PE=1 SV=1	17	19	10	cell organization and biogenesis;metabolic process;response to stimulus;transport	cytosol;membrane;mitochondrion;organelle lumen	catalytic activity;nucleotide binding;protein binding;transporter activity	ABCD3	1	Peroxisome; ABC transporters	ABC transporters in lipid homeostasis	0.467	10.97	6.91715e+07	3.16575e+07	High	Peak Found
High	Q15054	DNA polymerase delta subunit 3 OS=Homo sapiens OX=9606 GN=POLD3 PE=1 SV=2	13	6	6	cell organization and biogenesis;cellular homeostasis;metabolic process;response to stimulus	cytoplasm;nucleus	catalytic activity;protein binding;RNA binding	POLD3	11	Homologous recombination; DNA replication; Purine metabolism; Mismatch repair; Base excision repair; HTLV-I infection; Nucleotide excision repair; Metabolic pathways; Pyrimidine metabolism	Mismatch repair (MMR) directed by MSH2:MSH3 (MutSbeta); Mismatch repair (MMR) directed by MSH2:MSH6 (MutSalpha); Gap-filling DNA repair synthesis and ligation in TC-NER; HDR through Homologous Recombination (HRR); Gap-filling DNA repair synthesis and ligation in GG-NER; Dual Incision in GG-NER; Polymerase switching; Termination of translesion DNA synthesis; Recognition of DNA damage by PCNA-conta…	0.467	25.2	1.40767e+07	963819	High	Peak Found
High	Q7Z2E3	Aprataxin OS=Homo sapiens OX=9606 GN=APTX PE=1 SV=2	15	4	4	metabolic process;regulation of biological process;response to stimulus	chromosome;cytoplasm;nucleus	catalytic activity;DNA binding;metal ion binding;protein binding;RNA binding	APTX	9			0.467	5.09	3.41224e+06	2.67359e+06	High	Peak Found
High	Q3B726	DNA-directed RNA polymerase I subunit RPA43 OS=Homo sapiens OX=9606 GN=TWISTNB PE=1 SV=1	11	3	3	metabolic process;regulation of biological process	nucleus	catalytic activity	TWISTNB	7	Purine metabolism; RNA polymerase; Metabolic pathways; Pyrimidine metabolism	RNA Polymerase I Chain Elongation; NoRC negatively regulates rRNA expression; RNA Polymerase I Transcription Termination; RNA Polymerase I Promoter Escape; B-WICH complex positively regulates rRNA expression; RNA Polymerase I Transcription Initiation	0.467	23.46	6.46838e+06	2.6568e+06	High	Peak Found
Medium	O14939	Phospholipase D2 OS=Homo sapiens OX=9606 GN=PLD2 PE=1 SV=2	1	2	1	cell organization and biogenesis;cellular component movement;metabolic process;regulation of biological process;response to stimulus;transport	Golgi;membrane	catalytic activity;protein binding	PLD2	17	Endocytosis; Ether lipid metabolism; Glutamatergic synapse; Phospholipase D signaling pathway; Choline metabolism in cancer; Sphingolipid signaling pathway; Glycerophospholipid metabolism; Ras signaling pathway; Fc gamma R-mediated phagocytosis; GnRH signaling pathway; Metabolic pathways; cAMP signaling pathway	Synthesis of PG; Synthesis of PA; Role of phospholipids in phagocytosis	0.467	0	3.60394e+06	1684059	High	Peak Found
High	O75915	PRA1 family protein 3 OS=Homo sapiens OX=9606 GN=ARL6IP5 PE=1 SV=1	18	14	6	regulation of biological process;response to stimulus;transport	cytoplasm;cytoskeleton;endoplasmic reticulum;membrane	protein binding	ARL6IP5	3		Glutamate Neurotransmitter Release Cycle	0.468	17.86	7.02604e+07	2.8123e+07	High	Peak Found
High	Q9NZ01	Very-long-chain enoyl-CoA reductase OS=Homo sapiens OX=9606 GN=TECR PE=1 SV=1	20	18	8	metabolic process	cytoplasm;endoplasmic reticulum;membrane;nucleus	catalytic activity;protein binding	TECR	19	Fatty acid elongation; Biosynthesis of unsaturated fatty acids; Fatty acid metabolism	Synthesis of very long-chain fatty acyl-CoAs	0.468	12.5	8.78801e+07	4.51684e+07	High	Peak Found
High	Q86U70	LIM domain-binding protein 1 OS=Homo sapiens OX=9606 GN=LDB1 PE=1 SV=2	6	2	2	cell differentiation;cell organization and biogenesis;development;metabolic process;regulation of biological process;response to stimulus	nucleus	DNA binding;protein binding	LDB1	10	Transcriptional misregulation in cancer	Regulation of expression of SLITs and ROBOs; RUNX1 regulates transcription of genes involved in differentiation of HSCs	0.468	0	538388	252057	High	Peak Found
High	Q9UHA3	Probable ribosome biogenesis protein RLP24 OS=Homo sapiens OX=9606 GN=RSL24D1 PE=1 SV=1	18	5	3	cell organization and biogenesis;metabolic process	nucleus;ribosome	protein binding;RNA binding;structural molecule activity	RSL24D1	15	Ribosome		0.468	7.7	1.62427e+07	7.89746e+06	High	Peak Found
High	Q9GZS3	WD repeat-containing protein 61 OS=Homo sapiens OX=9606 GN=WDR61 PE=1 SV=1	57	25	13	cell organization and biogenesis;metabolic process;regulation of biological process;response to stimulus	cytoplasm;cytosol;nucleus	protein binding	WDR61	15	RNA degradation	mRNA decay by 3' to 5' exoribonuclease; E3 ubiquitin ligases ubiquitinate target proteins; Formation of RNA Pol II elongation complex ; RNA Polymerase II Pre-transcription Events	0.469	16	9.10384e+07	4.2056e+07	High	Peak Found
High	Q03001	Dystonin OS=Homo sapiens OX=9606 GN=DST PE=1 SV=4	2	14	10	cell organization and biogenesis;cellular component movement;regulation of biological process;response to stimulus;transport	cytoplasm;cytoskeleton;cytosol;endoplasmic reticulum;membrane;nucleus	metal ion binding;protein binding	DST	6		Type I hemidesmosome assembly	0.469	2.92	1.17791e+07	3.11369e+06	High	Peak Found
High	P18887	DNA repair protein XRCC1 OS=Homo sapiens OX=9606 GN=XRCC1 PE=1 SV=2	13	12	7	metabolic process;regulation of biological process;response to stimulus	nucleus	catalytic activity;DNA binding;protein binding	XRCC1	19	Base excision repair	Resolution of AP sites via the single-nucleotide replacement pathway; Gap-filling DNA repair synthesis and ligation in TC-NER; APEX1-Independent Resolution of AP Sites via the Single Nucleotide Replacement Pathway; HDR through MMEJ (alt-NHEJ); Gap-filling DNA repair synthesis and ligation in GG-NER	0.469	15.63	2.41459e+07	7.88749e+06	High	Peak Found
High	P82970	High mobility group nucleosome-binding domain-containing protein 5 OS=Homo sapiens OX=9606 GN=HMGN5 PE=1 SV=1	16	13	4	cell organization and biogenesis;metabolic process;regulation of biological process	chromosome;nucleus	DNA binding;protein binding;RNA binding	HMGN5	X			0.469	10.02	4.60016e+07	1.91179e+07	High	Peak Found
High	Q7Z6M1	Rab9 effector protein with kelch motifs OS=Homo sapiens OX=9606 GN=RABEPK PE=1 SV=1	11	4	3	transport	cytoplasm;cytosol;endosome;membrane	protein binding	RABEPK	9		Retrograde transport at the Trans-Golgi-Network	0.469	19.67	7.80246e+06	3.27873e+06	High	Peak Found
Medium	Q0VG06	Fanconi anemia core complex-associated protein 100 OS=Homo sapiens OX=9606 GN=FAAP100 PE=1 SV=3	1	1	1	metabolic process;response to stimulus	cytoskeleton;cytosol;nucleus	DNA binding;protein binding	C17orf70; FAAP100	17	Fanconi anemia pathway	Fanconi Anemia Pathway	0.469	0	620396	290727	High	Peak Found
High	O75367	Core histone macro-H2A.1 OS=Homo sapiens OX=9606 GN=H2AFY PE=1 SV=4	35	43	15	cell organization and biogenesis;regulation of biological process	chromosome;nucleus	DNA binding;enzyme regulator activity;protein binding	H2AFY	5	Systemic lupus erythematosus; Alcoholism		0.47	25.47	3.23017e+08	1.62631e+08	High	Peak Found
High	P53634	Dipeptidyl peptidase 1 OS=Homo sapiens OX=9606 GN=CTSC PE=1 SV=2	21	18	8	cell death;cell organization and biogenesis;metabolic process;regulation of biological process;response to stimulus;transport	endoplasmic reticulum;extracellular;Golgi;membrane;organelle lumen;vacuole	catalytic activity;enzyme regulator activity;protein binding	CTSC	11	Lysosome; Apoptosis	Neutrophil degranulation; MHC class II antigen presentation; Cargo concentration in the ER; COPII (Coat Protein 2) Mediated Vesicle Transport	0.47	8.33	8.05057e+07	3.70389e+07	High	Peak Found
High	Q7Z4W1	L-xylulose reductase OS=Homo sapiens OX=9606 GN=DCXR PE=1 SV=2	27	6	5	cell organization and biogenesis;metabolic process	membrane;nucleus	catalytic activity;protein binding	DCXR	17	Pentose and glucuronate interconversions; Metabolic pathways	Catabolism of glucuronate to xylulose-5-phosphate; Essential pentosuria	0.47	25.13	8.42484e+06	9.99718e+06	High	Peak Found
High	Q00839	Heterogeneous nuclear ribonucleoprotein U OS=Homo sapiens OX=9606 GN=HNRNPU PE=1 SV=6	54	244	65	cell differentiation;metabolic process;regulation of biological process;response to stimulus	cell surface;chromosome;cytoplasm;membrane;nucleus;spliceosomal complex	DNA binding;nucleotide binding;protein binding;RNA binding	HNRNPU	1	Spliceosome	mRNA Splicing - Major Pathway	0.471	12.68	3.45726e+09	1.6441e+09	High	Peak Found
High	Q8TEQ6	Gem-associated protein 5 OS=Homo sapiens OX=9606 GN=GEMIN5 PE=1 SV=3	11	20	16	cell organization and biogenesis;metabolic process;regulation of biological process;transport	cytoplasm;cytosol;membrane;nucleus	protein binding;RNA binding	GEMIN5	5	RNA transport	snRNP Assembly	0.471	13.15	3.62697e+07	1.58235e+07	High	Peak Found
High	O14639	Actin-binding LIM protein 1 OS=Homo sapiens OX=9606 GN=ABLIM1 PE=1 SV=3	11	9	8	cell organization and biogenesis	cytoplasm;cytoskeleton	metal ion binding;protein binding	ABLIM1	10	Axon guidance	DCC mediated attractive signaling	0.471	16.95	2.189e+07	1.40803e+07	High	Peak Found
High	O75691	Small subunit processome component 20 homolog OS=Homo sapiens OX=9606 GN=UTP20 PE=1 SV=3	2	4	4	metabolic process;regulation of biological process	cytoplasm;membrane;nucleus	protein binding;RNA binding	UTP20	12		Major pathway of rRNA processing in the nucleolus and cytosol; rRNA modification in the nucleus and cytosol	0.471	14.79	3.8113e+06	1.46852e+06	High	Peak Found
High	P26358	DNA (cytosine-5)-methyltransferase 1 OS=Homo sapiens OX=9606 GN=DNMT1 PE=1 SV=2	21	34	28	cell organization and biogenesis;metabolic process;regulation of biological process;response to stimulus	nucleus	catalytic activity;DNA binding;metal ion binding;nucleotide binding;protein binding;RNA binding	DNMT1	19	MicroRNAs in cancer; Metabolic pathways; Cysteine and methionine metabolism	PRC2 methylates histones and DNA; DNA methylation; NoRC negatively regulates rRNA expression	0.472	17.78	5.36008e+07	2.11406e+07	High	Peak Found
High	Q6P1J9	Parafibromin OS=Homo sapiens OX=9606 GN=CDC73 PE=1 SV=1	26	18	13	cell organization and biogenesis;metabolic process;regulation of biological process;response to stimulus	cytosol;nucleus	protein binding	CDC73	1		Hedgehog 'on' state; E3 ubiquitin ligases ubiquitinate target proteins; Formation of RNA Pol II elongation complex ; Formation of the beta-catenin:TCF transactivating complex; RNA Polymerase II Pre-transcription Events	0.472	4.84	5.8574e+07	2.49267e+07	High	Peak Found
High	P08651	Nuclear factor 1 C-type OS=Homo sapiens OX=9606 GN=NFIC PE=1 SV=2	24	9	8	metabolic process;regulation of biological process	nucleus	DNA binding	NFIC	19		RNA Polymerase III Abortive And Retractive Initiation; RNA Polymerase III Transcription Termination	0.472	16.71	1.61759e+07	7.42344e+06	High	Peak Found
High	O14732	Inositol monophosphatase 2 OS=Homo sapiens OX=9606 GN=IMPA2 PE=1 SV=1	14	7	5	metabolic process;regulation of biological process;response to stimulus	cytoplasm;cytosol	catalytic activity;metal ion binding;protein binding	IMPA2	18	Phosphatidylinositol signaling system; Inositol phosphate metabolism; Metabolic pathways	Synthesis of IP2, IP, and Ins in the cytosol	0.472	15.71	1.23661e+07	5.23052e+06	High	Peak Found
High	Q6NXT1	Ankyrin repeat domain-containing protein 54 OS=Homo sapiens OX=9606 GN=ANKRD54 PE=1 SV=2	8	2	2	regulation of biological process;transport	cytoplasm;nucleus	enzyme regulator activity;protein binding	ANKRD54	22			0.472	0	3.3664e+06	885617	High	Peak Found
Medium	Q9ULK4	Mediator of RNA polymerase II transcription subunit 23 OS=Homo sapiens OX=9606 GN=MED23 PE=1 SV=2	1	2	1	metabolic process;regulation of biological process	nucleus	protein binding	MED23	6		Transcriptional regulation of white adipocyte differentiation; PPARA activates gene expression; Generic Transcription Pathway	0.472	0	1.63612e+06	772065	High	Peak Found
Medium	Q8N660	Neuroblastoma breakpoint family member 15 OS=Homo sapiens OX=9606 GN=NBPF15 PE=2 SV=2	2	2	1		cytoplasm		NBPF15	1			0.472	0	32632905	15386539	High	Peak Found	Met-loss+Acetyl [N-Term]
High	P62805	Histone H4 OS=Homo sapiens OX=9606 GN=HIST4H4 PE=1 SV=2	82	197	23	cell organization and biogenesis;metabolic process;regulation of biological process;response to stimulus	chromosome;extracellular;membrane;nucleus	DNA binding;protein binding;RNA binding	HIST1H4A; HIST1H4F; HIST1H4D; HIST1H4J; HIST2H4A; HIST2H4B; HIST1H4H; HIST1H4C; HIST4H4; HIST1H4E; HIST1H4I; HIST1H4B; HIST1H4K; HIST1H4L	6; 1; 12	Viral carcinogenesis; Systemic lupus erythematosus; Alcoholism	SIRT1 negatively regulates rRNA expression; RMTs methylate histone arginines; Nonhomologous End-Joining (NHEJ); Activation of anterior HOX genes in hindbrain development during early embryogenesis; NoRC negatively regulates rRNA expression; Meiotic synapsis; Transcriptional regulation by small RNAs; Meiotic recombination; PRC2 methylates histones and DNA; Recruitment and ATM-mediated phosphorylat…	0.473	23.01	5.57269e+09	2.8109e+09	High	Peak Found
High	Q96C36	Pyrroline-5-carboxylate reductase 2 OS=Homo sapiens OX=9606 GN=PYCR2 PE=1 SV=1	27	13	7	metabolic process;response to stimulus	cytoplasm;mitochondrion;organelle lumen	catalytic activity;nucleotide binding	PYCR2	1	Biosynthesis of amino acids; Metabolic pathways; Arginine and proline metabolism	Amino acid synthesis and interconversion (transamination)	0.473	6.04	2.59528e+07	1.19137e+07	High	Peak Found
High	Q96LD4	E3 ubiquitin-protein ligase TRIM47 OS=Homo sapiens OX=9606 GN=TRIM47 PE=1 SV=2	12	10	7		cytoplasm;cytosol;nucleus	metal ion binding;protein binding	TRIM47	17			0.473	14.24	1.12037e+07	5.29859e+06	High	Peak Found
High	Q9UHL4	Dipeptidyl peptidase 2 OS=Homo sapiens OX=9606 GN=DPP7 PE=1 SV=3	13	10	6	metabolic process;transport	cytosol;extracellular;Golgi;organelle lumen;vacuole	catalytic activity	DPP7	9		Neutrophil degranulation	0.473	5.26	2.89352e+07	1.34041e+07	High	Peak Found
High	Q9Y4R8	Telomere length regulation protein TEL2 homolog OS=Homo sapiens OX=9606 GN=TELO2 PE=1 SV=2	7	6	6	regulation of biological process	chromosome;cytoplasm;cytosol;membrane;nucleus	protein binding;structural molecule activity	TELO2	16	Fanconi anemia pathway; mTOR signaling pathway		0.473	24.03	6.31688e+06	3.31733e+06	High	Peak Found
High	P37108	Signal recognition particle 14 kDa protein OS=Homo sapiens OX=9606 GN=SRP14 PE=1 SV=2	80	51	15	cell organization and biogenesis;response to stimulus;transport	cytoplasm;cytosol;extracellular;nucleus;organelle lumen	protein binding;RNA binding	SRP14	15	Protein export	Neutrophil degranulation; SRP-dependent cotranslational protein targeting to membrane	0.474	14.51	6.44132e+08	3.30785e+08	High	Peak Found	Met-loss [N-Term]
High	Q09028	Histone-binding protein RBBP4 OS=Homo sapiens OX=9606 GN=RBBP4 PE=1 SV=3	22	42	2	cell organization and biogenesis;metabolic process;regulation of biological process;response to stimulus	cytosol;nucleus	catalytic activity;DNA binding;protein binding	RBBP4	1		Regulation of TP53 Activity through Acetylation; Polo-like kinase mediated events; PKMTs methylate histone lysines; Activation of anterior HOX genes in hindbrain development during early embryogenesis; Cyclin A:Cdk2-associated events at S phase entry; Deposition of new CENPA-containing nucleosomes at the centromere; Transcription of E2F targets under negative control by p107 (RBL1) and p130 (RBL2…	0.474	18.84	4.93446e+07	2.36263e+07	High	Peak Found
High	Q7Z478	ATP-dependent RNA helicase DHX29 OS=Homo sapiens OX=9606 GN=DHX29 PE=1 SV=2	5	9	6	metabolic process	cytoplasm;mitochondrion	catalytic activity;nucleotide binding;protein binding;RNA binding	DHX29	5			0.474	14.48	1.35616e+07	5.91741e+06	High	Peak Found
High	Q13576	Ras GTPase-activating-like protein IQGAP2 OS=Homo sapiens OX=9606 GN=IQGAP2 PE=1 SV=4	10	28	10	cell organization and biogenesis;regulation of biological process;response to stimulus;transport	cell surface;cytoplasm;cytoskeleton;cytosol;membrane	enzyme regulator activity;protein binding	IQGAP2	5	Regulation of actin cytoskeleton	RHO GTPases activate IQGAPs; Neutrophil degranulation	0.475	23.91	2.22684e+07	1.98614e+07	High	Peak Found
High	Q9H583	HEAT repeat-containing protein 1 OS=Homo sapiens OX=9606 GN=HEATR1 PE=1 SV=3	6	12	8	metabolic process;regulation of biological process	membrane;mitochondrion;nucleus	protein binding;RNA binding	HEATR1	1	Ribosome biogenesis in eukaryotes	Major pathway of rRNA processing in the nucleolus and cytosol; rRNA modification in the nucleus and cytosol	0.475	43.68	1.62612e+08	1.46415e+07	High	Peak Found
High	P13987	CD59 glycoprotein OS=Homo sapiens OX=9606 GN=CD59 PE=1 SV=1	28	21	6	cell organization and biogenesis;coagulation;regulation of biological process;response to stimulus;transport	cell surface;extracellular;membrane	protein binding	CD59	11	Hematopoietic cell lineage; Complement and coagulation cascades	Regulation of Complement cascade; Neutrophil degranulation; Cargo concentration in the ER; COPII (Coat Protein 2) Mediated Vesicle Transport; COPI-mediated anterograde transport	0.475	10.17	4.68879e+08	2.50651e+08	High	Peak Found
High	Q9BSJ2	Gamma-tubulin complex component 2 OS=Homo sapiens OX=9606 GN=TUBGCP2 PE=1 SV=2	4	3	3	cell organization and biogenesis	cytoplasm;cytoskeleton;cytosol;membrane	protein binding;structural molecule activity	TUBGCP2	10		Recruitment of NuMA to mitotic centrosomes; Recruitment of mitotic centrosome proteins and complexes	0.475	130.64	6.37136e+06	1.1521e+07	High	Peak Found
High	Q9P206	Uncharacterized protein KIAA1522 OS=Homo sapiens OX=9606 GN=KIAA1522 PE=1 SV=2	4	3	3	cell differentiation			KIAA1522	1			0.475	5.06	4.98318e+06	4.91871e+06	High	Peak Found
High	Q8NBN3	Transmembrane protein 87A OS=Homo sapiens OX=9606 GN=TMEM87A PE=1 SV=3	6	2	2	transport	cytosol;Golgi;membrane		TMEM87A	15			0.475	22.71	2.33189e+06	1.20331e+06	High	Peak Found
High	Q9Y4X0	AMME syndrome candidate gene 1 protein OS=Homo sapiens OX=9606 GN=AMMECR1 PE=1 SV=1	4	1	1		nucleus	protein binding	AMMECR1	X			0.475	0	826261	392129	High	Peak Found
High	Q02818	Nucleobindin-1 OS=Homo sapiens OX=9606 GN=NUCB1 PE=1 SV=4	37	27	18	metabolic process;regulation of biological process;response to stimulus	cytoplasm;endoplasmic reticulum;endosome;extracellular;Golgi;membrane;nucleus;organelle lumen	DNA binding;metal ion binding;protein binding	NUCB1	19		Post-translational protein phosphorylation; Regulation of Insulin-like Growth Factor (IGF) transport and uptake by Insulin-like Growth Factor Binding Proteins (IGFBPs)	0.476	13.76	1.01276e+08	4.90932e+07	High	Peak Found
High	Q9NP58	ATP-binding cassette sub-family B member 6, mitochondrial OS=Homo sapiens OX=9606 GN=ABCB6 PE=1 SV=1	17	13	9	cellular homeostasis;metabolic process;transport	cytosol;endoplasmic reticulum;endosome;Golgi;membrane;mitochondrion	catalytic activity;nucleotide binding;transporter activity	ABCB6	2	ABC transporters	Defective ABCB6 causes isolated colobomatous microphthalmia 7 (MCOPCB7); Mitochondrial ABC transporters	0.476	15.67	4.97519e+08	4.65473e+08	High	Peak Found
High	O95470	Sphingosine-1-phosphate lyase 1 OS=Homo sapiens OX=9606 GN=SGPL1 PE=1 SV=3	17	9	8	cell death;cell differentiation;cellular component movement;metabolic process;regulation of biological process;response to stimulus	endoplasmic reticulum;membrane	catalytic activity;protein binding	SGPL1	10	Sphingolipid metabolism; Sphingolipid signaling pathway; Metabolic pathways	Sphingolipid de novo biosynthesis	0.476	19.14	2.35191e+07	6.5315e+06	High	Peak Found
High	Q8IY37	Probable ATP-dependent RNA helicase DHX37 OS=Homo sapiens OX=9606 GN=DHX37 PE=1 SV=1	5	6	6	metabolic process	cytoplasm	catalytic activity;nucleotide binding;RNA binding	DHX37	12		Major pathway of rRNA processing in the nucleolus and cytosol; rRNA modification in the nucleus and cytosol	0.476	8.82	8.84811e+06	3.08534e+06	High	Peak Found
High	Q5T653	39S ribosomal protein L2, mitochondrial OS=Homo sapiens OX=9606 GN=MRPL2 PE=1 SV=2	10	5	2	cell organization and biogenesis;metabolic process	membrane;mitochondrion;ribosome	catalytic activity;RNA binding;structural molecule activity	MRPL2	6	Ribosome	Mitochondrial translation initiation; Mitochondrial translation elongation; Mitochondrial translation termination	0.476	38.43	6.63533e+06	3.50842e+06	High	Peak Found
High	Q6P158	Putative ATP-dependent RNA helicase DHX57 OS=Homo sapiens OX=9606 GN=DHX57 PE=1 SV=2	1	1	1	metabolic process	mitochondrion	catalytic activity;metal ion binding;nucleotide binding;protein binding;RNA binding	DHX57	2			0.476	0	994106	472772	High	Peak Found
High	Q06787	Synaptic functional regulator FMR1 OS=Homo sapiens OX=9606 GN=FMR1 PE=1 SV=1	13	12	8	metabolic process;regulation of biological process;response to stimulus;transport	chromosome;cytoplasm;cytosol;membrane;nucleus;ribosome	protein binding;RNA binding;translation regulator activity	FMR1	X	RNA transport		0.477	12.81	2.00081e+07	9897712	High	Peak Found
High	O15438	Canalicular multispecific organic anion transporter 2 OS=Homo sapiens OX=9606 GN=ABCC3 PE=1 SV=3	4	5	4	transport	membrane	catalytic activity;nucleotide binding;transporter activity	ABCC3	17	Bile secretion; Antifolate resistance; ABC transporters	ABC-family proteins mediated transport; Recycling of bile acids and salts	0.477	14.34	6.42206e+06	2.58951e+06	High	Peak Found
High	Q9NVV4	Poly(A) RNA polymerase, mitochondrial OS=Homo sapiens OX=9606 GN=MTPAP PE=1 SV=1	14	8	5	metabolic process	cytoplasm;mitochondrion	catalytic activity;metal ion binding;nucleotide binding;protein binding;RNA binding	MTPAP	10			0.477	8.2	1.61301e+07	6.89847e+06	High	Peak Found
High	Q86UV5	Ubiquitin carboxyl-terminal hydrolase 48 OS=Homo sapiens OX=9606 GN=USP48 PE=1 SV=1	6	5	5	metabolic process	cytoplasm;cytosol;mitochondrion;nucleus	catalytic activity;protein binding	USP48	1		Ub-specific processing proteases	0.477	13.47	1.06864e+07	5.33628e+06	High	Peak Found
High	Q9BV57	1,2-dihydroxy-3-keto-5-methylthiopentene dioxygenase OS=Homo sapiens OX=9606 GN=ADI1 PE=1 SV=1	27	4	3	metabolic process;regulation of biological process	cytoplasm;cytosol;membrane;nucleus	catalytic activity;metal ion binding;protein binding	ADI1	2	Metabolic pathways; Cysteine and methionine metabolism	Methionine salvage pathway	0.477	11.46	9477380	4.7959e+06	High	Peak Found
High	Q9BSV6	tRNA-splicing endonuclease subunit Sen34 OS=Homo sapiens OX=9606 GN=TSEN34 PE=1 SV=1	4	2	1	metabolic process	nucleus	catalytic activity	TSEN34	19; CHR_HSCHR19LRC_LRC_J_CTG3_1; CHR_HSCHR19LRC_LRC_I_CTG3_1; CHR_HSCHR19LRC_PGF1_CTG3_1; CHR_HSCHR19LRC_LRC_T_CTG3_1; CHR_HSCHR19LRC_LRC_S_CTG3_1; CHR_HSCHR19LRC_COX1_CTG3_1; CHR_HSCHR19LRC_COX2_CTG3_1; CHR_HSCHR19_4_CTG3_1; CHR_HSCHR19LRC_PGF2_CTG3_1		tRNA processing in the nucleus	0.477	0	968660	461833	High	Peak Found
High	Q9UKX7	Nuclear pore complex protein Nup50 OS=Homo sapiens OX=9606 GN=NUP50 PE=1 SV=2	40	15	13	cell organization and biogenesis;metabolic process;regulation of biological process;transport	membrane;nucleus	protein binding	NUP50	22	RNA transport	Rev-mediated nuclear export of HIV RNA; ISG15 antiviral mechanism; NEP/NS2 Interacts with the Cellular Export Machinery; tRNA processing in the nucleus; Transcriptional regulation by small RNAs; Nuclear Pore Complex (NPC) Disassembly; Regulation of Glucokinase by Glucokinase Regulatory Protein; Vpr-mediated nuclear import of PICs; Regulation of HSF1-mediated heat shock response; snRNP Assembly; S…	0.478	20.94	4.10577e+07	1.72173e+07	High	Peak Found
High	Q8NEY8	Periphilin-1 OS=Homo sapiens OX=9606 GN=PPHLN1 PE=1 SV=2	21	9	9	metabolic process;regulation of biological process	chromosome;cytoplasm;cytosol;Golgi;nucleus	protein binding;RNA binding	PPHLN1	12			0.478	16.62	2.0534e+07	8.89689e+06	High	Peak Found
High	A0A0B4J1V8	HCG2039996 OS=Homo sapiens OX=9606 GN=PPAN-P2RY11 PE=3 SV=1	4	8	4	cell organization and biogenesis;regulation of biological process;response to stimulus	membrane	receptor activity;RNA binding;signal transducer activity	PPAN-P2RY11	19			0.478	4.16	1.69338e+07	1.95623e+07	High	Peak Found
High	Q5U5X0	Complex III assembly factor LYRM7 OS=Homo sapiens OX=9606 GN=LYRM7 PE=1 SV=1	23	2	2	cell organization and biogenesis;metabolic process	membrane;mitochondrion;organelle lumen	protein binding	LYRM7	5			0.478	0	3357272	805136	High	Peak Found
High	Q9UNX4	WD repeat-containing protein 3 OS=Homo sapiens OX=9606 GN=WDR3 PE=1 SV=1	14	11	8	metabolic process	membrane;nucleus	protein binding;RNA binding	WDR3	1	Ribosome biogenesis in eukaryotes	Major pathway of rRNA processing in the nucleolus and cytosol; rRNA modification in the nucleus and cytosol	0.479	15.13	2.41779e+07	1.03754e+07	High	Peak Found
High	P40692	DNA mismatch repair protein Mlh1 OS=Homo sapiens OX=9606 GN=MLH1 PE=1 SV=1	10	8	7	cell organization and biogenesis;metabolic process;regulation of biological process;response to stimulus	chromosome;membrane;nucleus	catalytic activity;DNA binding;nucleotide binding;protein binding	MLH1	3	Endometrial cancer; Colorectal cancer; Fanconi anemia pathway; Pathways in cancer; Mismatch repair; Platinum drug resistance	Mismatch repair (MMR) directed by MSH2:MSH3 (MutSbeta); Mismatch repair (MMR) directed by MSH2:MSH6 (MutSalpha); TP53 Regulates Transcription of DNA Repair Genes; Defective Mismatch Repair Associated With MLH1; Meiotic recombination; Defective Mismatch Repair Associated With PMS2	0.479	41.91	1.26113e+07	1.21383e+06	High	Peak Found
High	Q71DI3	Histone H3.2 OS=Homo sapiens OX=9606 GN=HIST2H3D PE=1 SV=3	82	173	2	cell organization and biogenesis;coagulation;metabolic process;regulation of biological process;response to stimulus	chromosome;extracellular;nucleus	DNA binding;protein binding	HIST2H3A; HIST2H3C; HIST2H3D	1	Transcriptional misregulation in cancer; Systemic lupus erythematosus; Alcoholism	SIRT1 negatively regulates rRNA expression; RMTs methylate histone arginines; Activation of anterior HOX genes in hindbrain development during early embryogenesis; NoRC negatively regulates rRNA expression; Interleukin-7 signaling; Factors involved in megakaryocyte development and platelet production; Transcriptional regulation by small RNAs; Meiotic recombination; PRC2 methylates histones and DN…	0.48	22.86	9.71913e+09	5.27863e+09	High	Peak Found
High	Q7Z5L9	Interferon regulatory factor 2-binding protein 2 OS=Homo sapiens OX=9606 GN=IRF2BP2 PE=1 SV=2	24	11	7	metabolic process;regulation of biological process	cytoplasm;nucleus	metal ion binding	IRF2BP2	1			0.48	35.85	1.93073e+07	9.38651e+06	High	Peak Found
High	Q9ULJ6	Zinc finger MIZ domain-containing protein 1 OS=Homo sapiens OX=9606 GN=ZMIZ1 PE=1 SV=3	3	3	3	cell differentiation;cell organization and biogenesis;metabolic process;regulation of biological process	cytoplasm;nucleus	metal ion binding	ZMIZ1	10			0.48	9.73	1.96808e+06	532001	High	Peak Found
High	O15381	Nuclear valosin-containing protein-like OS=Homo sapiens OX=9606 GN=NVL PE=1 SV=1	12	9	8	metabolic process;regulation of biological process;response to stimulus	membrane;nucleus	catalytic activity;nucleotide binding;protein binding;RNA binding	NVL	1	Ribosome biogenesis in eukaryotes		0.481	13.7	9.47164e+06	3.67406e+06	High	Peak Found
High	Q96IX5	ATP synthase membrane subunit DAPIT, mitochondrial OS=Homo sapiens OX=9606 GN=ATP5MD PE=1 SV=1	47	5	3		membrane;mitochondrion		USMG5	10			0.481	11.72	1.51376e+07	7.1663e+06	High	Peak Found	Met-loss [N-Term]
High	P29279	Connective tissue growth factor OS=Homo sapiens OX=9606 GN=CTGF PE=1 SV=2	8	3	3	cell communication;cell differentiation;cell proliferation;cellular component movement;metabolic process;regulation of biological process;response to stimulus;transport	cytosol;extracellular;Golgi;membrane	protein binding	CTGF	6	Hippo signaling pathway	YAP1- and WWTR1 (TAZ)-stimulated gene expression; PPARA activates gene expression; RUNX3 regulates YAP1-mediated transcription	0.481	45.52	5.3185e+06	2.24688e+06	High	Peak Found
High	Q9BYD1	39S ribosomal protein L13, mitochondrial OS=Homo sapiens OX=9606 GN=MRPL13 PE=1 SV=1	38	9	6	cell organization and biogenesis;metabolic process	membrane;mitochondrion;ribosome	protein binding;RNA binding;structural molecule activity	MRPL13	8	Ribosome	Mitochondrial translation initiation; Mitochondrial translation elongation; Mitochondrial translation termination	0.482	17.97	3.12418e+07	1.417e+07	High	Peak Found
High	Q86U90	YrdC domain-containing protein, mitochondrial OS=Homo sapiens OX=9606 GN=YRDC PE=1 SV=1	24	5	4	metabolic process;regulation of biological process	cytoplasm;membrane;mitochondrion	catalytic activity;RNA binding	YRDC	1			0.482	5.9	4.55299e+06	2.10057e+06	High	Peak Found
High	Q9UK61	Protein TASOR OS=Homo sapiens OX=9606 GN=TASOR PE=1 SV=3	2	2	2	metabolic process;regulation of biological process	chromosome;nucleus	protein binding;RNA binding	FAM208A	3			0.482	0	1.08463e+06	334381	High	Peak Found
High	A1L390	Pleckstrin homology domain-containing family G member 3 OS=Homo sapiens OX=9606 GN=PLEKHG3 PE=1 SV=1	1	2	1	regulation of biological process			PLEKHG3	14			0.482	0	456608	220202	High	Peak Found
High	B4DLN1	cDNA FLJ60124, highly similar to Mitochondrial dicarboxylate carrier OS=Homo sapiens OX=9606 PE=2 SV=1	25	31	9	metabolic process;transport	membrane;mitochondrion;ribosome	structural molecule activity;transporter activity		17			0.483	18.43	1.76347e+08	8.47129e+07	High	Peak Found
High	Q92743	Serine protease HTRA1 OS=Homo sapiens OX=9606 GN=HTRA1 PE=1 SV=1	22	11	10	cell differentiation;cell organization and biogenesis;metabolic process;regulation of biological process	cytoplasm;cytosol;extracellular;membrane	catalytic activity;protein binding	HTRA1	10		Degradation of the extracellular matrix	0.483	12.11	1.56451e+07	7.21093e+06	High	Peak Found
High	Q9BT25	HAUS augmin-like complex subunit 8 OS=Homo sapiens OX=9606 GN=HAUS8 PE=1 SV=3	13	3	3	cell division;cell organization and biogenesis;regulation of biological process	cytoplasm;cytoskeleton;cytosol	protein binding	HAUS8	19		Regulation of PLK1 Activity at G2/M Transition; AURKA Activation by TPX2; Anchoring of the basal body to the plasma membrane; Recruitment of NuMA to mitotic centrosomes; Loss of Nlp from mitotic centrosomes; Recruitment of mitotic centrosome proteins and complexes	0.483	37.04	2.41795e+06	1.15095e+06	High	Peak Found
High	Q9Y232	Chromodomain Y-like protein OS=Homo sapiens OX=9606 GN=CDYL PE=1 SV=2	5	3	3	cell differentiation;metabolic process;regulation of biological process	chromosome;nucleus	catalytic activity;protein binding	CDYL	6			0.483	0	3066526	1.48063e+06	High	Peak Found
High	Q9H5K3	Protein O-mannose kinase OS=Homo sapiens OX=9606 GN=POMK PE=1 SV=1	2	1	1	cellular component movement;metabolic process;response to stimulus	endoplasmic reticulum;membrane	catalytic activity;nucleotide binding	POMK; SGK196	8		O-linked glycosylation	0.483	0	881053	425346	High	Peak Found
High	O75475	PC4 and SFRS1-interacting protein OS=Homo sapiens OX=9606 GN=PSIP1 PE=1 SV=1	43	62	26	cell organization and biogenesis;metabolic process;regulation of biological process;response to stimulus;transport	cytosol;nucleus	DNA binding;metal ion binding;protein binding;RNA binding	PSIP1	9		2-LTR circle formation; APOBEC3G mediated resistance to HIV-1 infection; Integration of viral DNA into host genomic DNA; Vpr-mediated nuclear import of PICs; Autointegration results in viral DNA circles	0.484	10.66	4.47124e+08	2.94955e+08	High	Peak Found	Met-loss [N-Term]
High	Q9Y4W6	AFG3-like protein 2 OS=Homo sapiens OX=9606 GN=AFG3L2 PE=1 SV=2	16	15	11	cell organization and biogenesis;cellular homeostasis;metabolic process;regulation of biological process;response to stimulus;transport	membrane;mitochondrion	catalytic activity;metal ion binding;nucleotide binding;protein binding	AFG3L2	18		Processing of SMDT1	0.484	10.4	3.50738e+07	16572095	High	Peak Found
High	O95801	Tetratricopeptide repeat protein 4 OS=Homo sapiens OX=9606 GN=TTC4 PE=1 SV=3	21	7	6			protein binding	TTC4	1			0.484	23.26	1.424e+07	4.53556e+06	High	Peak Found
High	Q16850	Lanosterol 14-alpha demethylase OS=Homo sapiens OX=9606 GN=CYP51A1 PE=1 SV=3	8	4	4	metabolic process;regulation of biological process	endoplasmic reticulum;membrane	catalytic activity;metal ion binding	CYP51A1	7	Steroid biosynthesis; Metabolic pathways	Cholesterol biosynthesis; Endogenous sterols; Activation of gene expression by SREBF (SREBP)	0.484	9.52	9.44723e+06	3.17635e+06	High	Peak Found
High	Q86X83	COMM domain-containing protein 2 OS=Homo sapiens OX=9606 GN=COMMD2 PE=1 SV=2	18	4	4	metabolic process;regulation of biological process	cytoplasm	protein binding	COMMD2	3		Neddylation	0.484	67	1.2192e+07	8.12724e+06	High	Peak Found
Low	P28065	Proteasome subunit beta type-9 OS=Homo sapiens OX=9606 GN=PSMB9 PE=1 SV=2	5	1	1	metabolic process;regulation of biological process;response to stimulus;transport	cytoplasm;cytosol;nucleus;proteasome	catalytic activity;protein binding	PSMB9	6; CHR_HSCHR6_MHC_MANN_CTG1; CHR_HSCHR6_MHC_QBL_CTG1; CHR_HSCHR6_MHC_COX_CTG1; CHR_HSCHR6_MHC_DBB_CTG1	Proteasome	Regulation of RAS by GAPs; CDT1 association with the CDC6:ORC:origin complex; Downstream TCR signaling; UCH proteinases; NIK-->noncanonical NF-kB signaling; Hh mutants that don't undergo autocatalytic processing are degraded by ERAD; SCF-beta-TrCP mediated degradation of Emi1; Cross-presentation of soluble exogenous antigens (endosomes); Separation of Sister Chromatids; Vpu mediated degradation o…	0.484	0	3.21135e+06	1.55589e+06	High	Peak Found
High	O75616	GTPase Era, mitochondrial OS=Homo sapiens OX=9606 GN=ERAL1 PE=1 SV=2	22	9	7	cell organization and biogenesis;metabolic process;regulation of biological process;response to stimulus	cytosol;membrane;mitochondrion;organelle lumen	catalytic activity;nucleotide binding;protein binding;RNA binding	ERAL1	17		Mitochondrial translation initiation; Mitochondrial translation elongation; Mitochondrial translation termination	0.485	18.99	1.72718e+07	7.97472e+06	High	Peak Found
High	Q9BRJ6	Uncharacterized protein C7orf50 OS=Homo sapiens OX=9606 GN=C7orf50 PE=1 SV=1	40	7	6			protein binding;RNA binding	C7orf50	7			0.485	9.32	1.69136e+07	6.42896e+06	High	Peak Found
High	Q96JJ7	Protein disulfide-isomerase TMX3 OS=Homo sapiens OX=9606 GN=TMX3 PE=1 SV=2	8	5	2	cellular homeostasis;metabolic process;regulation of biological process;response to stimulus;transport	cell surface;endoplasmic reticulum;membrane	catalytic activity;metal ion binding;protein binding	TMX3	18		Platelet degranulation	0.485	0	5.86259e+06	2.84193e+06	High	Peak Found
High	P17275	Transcription factor jun-B OS=Homo sapiens OX=9606 GN=JUNB PE=1 SV=1	13	4	4	cell differentiation;cell proliferation;metabolic process;regulation of biological process;response to stimulus	chromosome;nucleus	DNA binding;protein binding	JUNB	19	TNF signaling pathway; Osteoclast differentiation	Interleukin-4 and 13 signaling; SMAD2/SMAD3:SMAD4 heterotrimer regulates transcription	0.485	17.63	1.11983e+07	3.75773e+06	High	Peak Found
High	Q9H5X1	Cytosolic iron-sulfur assembly component 2A OS=Homo sapiens OX=9606 GN=CIAO2A PE=1 SV=1	13	3	2		cytoplasm;cytosol;nucleus	metal ion binding;protein binding	FAM96A	15			0.485	42.47	5.81752e+06	2.76526e+06	High	Peak Found
High	Q9NWU1	3-oxoacyl-[acyl-carrier-protein] synthase, mitochondrial OS=Homo sapiens OX=9606 GN=OXSM PE=1 SV=1	2	2	1	metabolic process	cytosol;mitochondrion	catalytic activity	OXSM	3	Fatty acid biosynthesis; Biotin metabolism; Metabolic pathways; Fatty acid metabolism		0.485	0	3.44935e+06	1.6722e+06	High	Peak Found
High	Q12931	Heat shock protein 75 kDa, mitochondrial OS=Homo sapiens OX=9606 GN=TRAP1 PE=1 SV=3	64	107	41	metabolic process;regulation of biological process;response to stimulus	membrane;mitochondrion;organelle lumen	nucleotide binding;protein binding;RNA binding	TRAP1	16		Respiratory electron transport	0.486	8.99	7.62492e+08	3.6153e+08	High	Peak Found
High	O60568	Multifunctional procollagen lysine hydroxylase and glycosyltransferase LH3 OS=Homo sapiens OX=9606 GN=PLOD3 PE=1 SV=1	37	45	22	cell organization and biogenesis;metabolic process;response to stimulus	endoplasmic reticulum;Golgi;membrane	catalytic activity;metal ion binding;protein binding	PLOD3	7	Lysine degradation; Other types of O-glycan biosynthesis	Collagen biosynthesis and modifying enzymes	0.486	19.51	1.15713e+08	5.53718e+07	High	Peak Found
High	Q13630	GDP-L-fucose synthase OS=Homo sapiens OX=9606 GN=TSTA3 PE=1 SV=1	28	15	8	metabolic process	cytoplasm;cytosol	catalytic activity;protein binding	TSTA3	8; CHR_HSCHR8_3_CTG7	Fructose and mannose metabolism; Amino sugar and nucleotide sugar metabolism; Metabolic pathways	GDP-fucose biosynthesis	0.486	7.92	5.39513e+07	2.50838e+07	High	Peak Found
High	Q9Y221	60S ribosome subunit biogenesis protein NIP7 homolog OS=Homo sapiens OX=9606 GN=NIP7 PE=1 SV=1	61	9	6	cell organization and biogenesis	cytosol;nucleus	protein binding;RNA binding	NIP7	16		Major pathway of rRNA processing in the nucleolus and cytosol	0.486	19.21	2.69607e+07	1.29959e+07	High	Peak Found
High	Q9NY61	Protein AATF OS=Homo sapiens OX=9606 GN=AATF PE=1 SV=1	4	3	2	cell division;regulation of biological process;response to stimulus	cytoplasm;Golgi;nucleus	protein binding;RNA binding	AATF	17; CHR_HSCHR17_7_CTG4		NRAGE signals death through JNK; Signalling by NGF	0.486	0	4.97983e+06	1.05751e+06	High	Peak Found
High	Q9Y6K0	Choline/ethanolaminephosphotransferase 1 OS=Homo sapiens OX=9606 GN=CEPT1 PE=1 SV=1	3	2	1	metabolic process	endoplasmic reticulum;membrane;nucleus	catalytic activity;metal ion binding	CEPT1	1	Ether lipid metabolism; Glycerophospholipid metabolism; Metabolic pathways	Synthesis of PC; Synthesis of PE	0.486	0	1412067	686501	High	Peak Found
High	Q9UKD2	mRNA turnover protein 4 homolog OS=Homo sapiens OX=9606 GN=MRTO4 PE=1 SV=2	54	27	12	cell organization and biogenesis;metabolic process	cytoplasm;nucleus	protein binding;RNA binding	MRTO4	1			0.487	16.12	9.88111e+07	4.97859e+07	High	Peak Found
High	Q96GM8	Target of EGR1 protein 1 OS=Homo sapiens OX=9606 GN=TOE1 PE=1 SV=1	12	7	5	metabolic process	cytoplasm;nucleus	catalytic activity;metal ion binding;protein binding;RNA binding	TOE1	1			0.487	9.07	8.72651e+06	4.1287e+06	High	Peak Found
High	Q00535	Cyclin-dependent-like kinase 5 OS=Homo sapiens OX=9606 GN=CDK5 PE=1 SV=3	17	5	4	cell communication;cell death;cell differentiation;cell division;cell growth;cell organization and biogenesis;cell proliferation;cellular component movement;metabolic process;regulation of biological process;response to stimulus;transport	cytoplasm;cytoskeleton;cytosol;membrane;nucleus	catalytic activity;nucleotide binding;protein binding	CDK5	7	Alzheimer's disease; Cocaine addiction; Axon guidance	Signaling by GPCR; DARPP-32 events; CRMPs in Sema3A signaling; Regulation of TP53 Activity through Phosphorylation; Deregulated CDK5 triggers multiple neurodegenerative pathways in Alzheimer's disease models; Factors involved in megakaryocyte development and platelet production	0.487	0	8.25923e+06	2.0439e+06	High	Peak Found
High	Q9H7B4	Histone-lysine N-methyltransferase SMYD3 OS=Homo sapiens OX=9606 GN=SMYD3 PE=1 SV=4	10	4	3	cell organization and biogenesis;metabolic process;regulation of biological process;response to stimulus	cytoplasm;nucleus	catalytic activity;DNA binding;metal ion binding;protein binding	SMYD3	1		PKMTs methylate histone lysines	0.487	1.75	5.56432e+06	2.70027e+06	High	Peak Found
High	P78381	UDP-galactose translocator OS=Homo sapiens OX=9606 GN=SLC35A2 PE=1 SV=1	3	1	1	metabolic process;transport	endoplasmic reticulum;Golgi;membrane;nucleus	protein binding;transporter activity	SLC35A2	X		Defective SLC35A2 causes congenital disorder of glycosylation 2M (CDG2M); Transport of nucleotide sugars	0.487	0	406650	197917	High	Peak Found
High	O43837	Isocitrate dehydrogenase [NAD] subunit beta, mitochondrial OS=Homo sapiens OX=9606 GN=IDH3B PE=1 SV=2	33	18	11	metabolic process	mitochondrion;nucleus;organelle lumen	catalytic activity;metal ion binding;nucleotide binding	IDH3B	20	Citrate cycle (TCA cycle); Carbon metabolism; Biosynthesis of amino acids; 2-Oxocarboxylic acid metabolism; Metabolic pathways	Citric acid cycle (TCA cycle)	0.488	7.4	6.15718e+07	2.67766e+07	High	Peak Found
High	Q8NEC7	Glutathione S-transferase C-terminal domain-containing protein OS=Homo sapiens OX=9606 GN=GSTCD PE=1 SV=2	4	2	2	metabolic process	cytoplasm	catalytic activity;protein binding	GSTCD	4			0.488	0	707804	102170	High	Peak Found
High	Q9BQC6	Ribosomal protein 63, mitochondrial OS=Homo sapiens OX=9606 GN=MRPL57 PE=1 SV=1	13	1	1	cell organization and biogenesis;metabolic process	membrane;mitochondrion;ribosome	structural molecule activity	MRP63; MRPL57	13		Mitochondrial translation initiation; Mitochondrial translation elongation; Mitochondrial translation termination	0.488	0	1.88347e+06	919734	High	Peak Found
High	P61106	Ras-related protein Rab-14 OS=Homo sapiens OX=9606 GN=RAB14 PE=1 SV=4	67	30	14	cell organization and biogenesis;defense response;metabolic process;regulation of biological process;response to stimulus;transport	cytosol;endoplasmic reticulum;endosome;Golgi;membrane;vacuole	catalytic activity;nucleotide binding;protein binding	RAB14	9	AMPK signaling pathway	Translocation of GLUT4 to the plasma membrane; Neutrophil degranulation; Synthesis of PIPs at the plasma membrane; RAB GEFs exchange GTP for GDP on RABs; RAB geranylgeranylation	0.489	21.7	9.05962e+07	4.45847e+07	High	Peak Found
High	Q8N806	Putative E3 ubiquitin-protein ligase UBR7 OS=Homo sapiens OX=9606 GN=UBR7 PE=1 SV=2	23	6	6	metabolic process		catalytic activity;metal ion binding	UBR7	14; CHR_HSCHR14_7_CTG1			0.489	22.64	1.02147e+07	3.23538e+06	High	Peak Found
High	Q13405	39S ribosomal protein L49, mitochondrial OS=Homo sapiens OX=9606 GN=MRPL49 PE=1 SV=1	25	6	5	cell organization and biogenesis;metabolic process	membrane;mitochondrion;ribosome	protein binding;structural molecule activity	MRPL49	11		Mitochondrial translation initiation; Mitochondrial translation elongation; Mitochondrial translation termination	0.489	9.95	1.55277e+07	7.82479e+06	High	Peak Found
High	Q9UIV1	CCR4-NOT transcription complex subunit 7 OS=Homo sapiens OX=9606 GN=CNOT7 PE=1 SV=3	18	3	3	cell organization and biogenesis;defense response;metabolic process;regulation of biological process;response to stimulus	cytoplasm;cytosol;membrane;nucleus	catalytic activity;metal ion binding;protein binding;RNA binding;signal transducer activity	CNOT7	8	RNA degradation	TP53 regulates transcription of additional cell cycle genes whose exact role in the p53 pathway remain uncertain; Deadenylation of mRNA	0.489	1.45	3.3024e+06	1.93973e+06	High	Peak Found
High	Q9NW13	RNA-binding protein 28 OS=Homo sapiens OX=9606 GN=RBM28 PE=1 SV=3	22	16	13	metabolic process	nucleus;spliceosomal complex	RNA binding	RBM28	7	Ribosome biogenesis in eukaryotes	Major pathway of rRNA processing in the nucleolus and cytosol	0.49	14.55	3.4078e+07	1.90973e+07	High	Peak Found
High	O43929	Origin recognition complex subunit 4 OS=Homo sapiens OX=9606 GN=ORC4 PE=1 SV=2	12	5	4	metabolic process	cytosol;nucleus	DNA binding;nucleotide binding;protein binding	ORC4	2	Cell cycle	M/G1 Transition; CDT1 association with the CDC6:ORC:origin complex; Regulation of DNA replication; Activation of ATR in response to replication stress; Activation of the pre-replicative complex; CDC6 association with the ORC:origin complex; Association of licensing factors with the pre-replicative complex; E2F-enabled inhibition of pre-replication complex formation; Assembly of the ORC complex at…	0.49	9.85	8.64254e+06	2.04105e+06	High	Peak Found
High	Q99735	Microsomal glutathione S-transferase 2 OS=Homo sapiens OX=9606 GN=MGST2 PE=1 SV=1	11	7	2	metabolic process;regulation of biological process;response to stimulus	cytoplasm;endoplasmic reticulum;membrane	antioxidant activity;catalytic activity;enzyme regulator activity;protein binding	MGST2	4	Glutathione metabolism; Metabolism of xenobiotics by cytochrome P450; Drug metabolism - cytochrome P450; Chemical carcinogenesis; Platinum drug resistance	Glutathione conjugation; Aflatoxin activation and detoxification	0.49	6.49	1.75358e+07	8.41259e+06	High	Peak Found
High	Q9H173	Nucleotide exchange factor SIL1 OS=Homo sapiens OX=9606 GN=SIL1 PE=1 SV=1	6	2	2	metabolic process;transport	endoplasmic reticulum;organelle lumen	protein binding	SIL1	5	Protein processing in endoplasmic reticulum		0.49	0	397798	194845	High	Peak Found
High	Q9H900	Protein zwilch homolog OS=Homo sapiens OX=9606 GN=ZWILCH PE=1 SV=2	6	3	3	cell division;cell organization and biogenesis;regulation of biological process	chromosome;cytosol	protein binding	ZWILCH	15		Amplification of signal from unattached kinetochores via a MAD2 inhibitory signal; Separation of Sister Chromatids; Resolution of Sister Chromatid Cohesion; RHO GTPases Activate Formins	0.49	0	709661	1.4623e+06	High	Peak Found
Medium	Q8N954	G patch domain-containing protein 11 OS=Homo sapiens OX=9606 GN=GPATCH11 PE=1 SV=4	2	1	1								0.49	0	1.26525e+06	619853	High	Peak Found
Medium	Q96P88	Putative gonadotropin-releasing hormone II receptor OS=Homo sapiens OX=9606 GN=GNRHR2 PE=5 SV=4	2	1	1	regulation of biological process;response to stimulus	membrane	receptor activity;signal transducer activity	GNRHR2	1		Gastrin-CREB signalling pathway via PKC and MAPK; Hormone ligand-binding receptors	0.49	0	4.05575e+06	1.98835e+06	High	Peak Found
Low	P10646	Tissue factor pathway inhibitor OS=Homo sapiens OX=9606 GN=TFPI PE=1 SV=1	2	1	1	coagulation;metabolic process;regulation of biological process;response to stimulus	cell surface;endoplasmic reticulum;extracellular;membrane	enzyme regulator activity	TFPI	2	Complement and coagulation cascades	Extrinsic Pathway of Fibrin Clot Formation	0.49	0	938008	460060	High	Peak Found
High	Q9UDY4	DnaJ homolog subfamily B member 4 OS=Homo sapiens OX=9606 GN=DNAJB4 PE=1 SV=1	26	9	7	metabolic process;regulation of biological process;response to stimulus	cytoplasm;cytosol;membrane	enzyme regulator activity;protein binding	DNAJB4	1			0.491	10.69	1.8793e+07	9.34788e+06	High	Peak Found
High	Q9Y613	FH1/FH2 domain-containing protein 1 OS=Homo sapiens OX=9606 GN=FHOD1 PE=1 SV=3	6	5	5	regulation of biological process	cytoplasm;cytoskeleton;cytosol;membrane;nucleus	protein binding	FHOD1	16			0.491	0	3.65529e+06	1.17026e+06	High	Peak Found
High	Q5HYA8	Meckelin OS=Homo sapiens OX=9606 GN=TMEM67 PE=1 SV=2	1	1	1	cell organization and biogenesis;metabolic process;regulation of biological process	cytoplasm;cytoskeleton;endoplasmic reticulum;membrane	protein binding	TMEM67	8		Anchoring of the basal body to the plasma membrane	0.491	0	5.37945e+06	2.6391e+06	High	Peak Found
High	Q96A33	Coiled-coil domain-containing protein 47 OS=Homo sapiens OX=9606 GN=CCDC47 PE=1 SV=1	35	24	16	cell differentiation;cell organization and biogenesis;metabolic process;regulation of biological process;response to stimulus	endoplasmic reticulum;membrane	metal ion binding;protein binding;RNA binding	CCDC47	17			0.492	7.03	54026817	4.48069e+07	High	Peak Found
High	P41223	Protein BUD31 homolog OS=Homo sapiens OX=9606 GN=BUD31 PE=1 SV=2	69	16	11	cell organization and biogenesis;metabolic process;regulation of biological process	nucleus;spliceosomal complex	catalytic activity;protein binding	BUD31	7	Spliceosome	mRNA Splicing - Major Pathway	0.492	7.41	8.15048e+07	3.11653e+07	High	Peak Found
High	Q15382	GTP-binding protein Rheb OS=Homo sapiens OX=9606 GN=RHEB PE=1 SV=1	39	15	9	regulation of biological process;response to stimulus	cytoplasm;cytosol;endoplasmic reticulum;Golgi;membrane;spliceosomal complex	catalytic activity;metal ion binding;nucleotide binding;protein binding	RHEB	7	Insulin signaling pathway; Phospholipase D signaling pathway; Thyroid hormone signaling pathway; Choline metabolism in cancer; AMPK signaling pathway; mTOR signaling pathway; Longevity regulating pathway; PI3K-Akt signaling pathway	Energy dependent regulation of mTOR by LKB1-AMPK; Regulation of PTEN gene transcription; mTORC1-mediated signalling; TP53 Regulates Metabolic Genes; Macroautophagy	0.492	10.25	6.559e+07	3.25745e+07	High	Peak Found
High	Q8IVS2	Malonyl-CoA-acyl carrier protein transacylase, mitochondrial OS=Homo sapiens OX=9606 GN=MCAT PE=1 SV=2	22	5	5	metabolic process	mitochondrion;organelle lumen	catalytic activity;RNA binding	MCAT	22	Fatty acid biosynthesis; Metabolic pathways; Fatty acid metabolism	Mitochondrial Fatty Acid Beta-Oxidation	0.492	9.49	7.87152e+06	4.098e+06	High	Peak Found
High	Q9HCG8	Pre-mRNA-splicing factor CWC22 homolog OS=Homo sapiens OX=9606 GN=CWC22 PE=1 SV=3	6	5	5	metabolic process;regulation of biological process	cytosol;nucleus;spliceosomal complex	protein binding;RNA binding	CWC22	2		mRNA Splicing - Major Pathway	0.492	0	4.48382e+06	1.46505e+06	High	Peak Found
High	Q8TAD8	Smad nuclear-interacting protein 1 OS=Homo sapiens OX=9606 GN=SNIP1 PE=1 SV=1	6	2	2	metabolic process;regulation of biological process;response to stimulus	cytosol;nucleus	protein binding;RNA binding	SNIP1	1			0.492	12.53	2.92772e+06	1.38212e+06	High	Peak Found
High	Q13416	Origin recognition complex subunit 2 OS=Homo sapiens OX=9606 GN=ORC2 PE=1 SV=2	3	2	2	metabolic process;regulation of biological process	chromosome;membrane;nucleus	DNA binding;protein binding	ORC2	2	Cell cycle	M/G1 Transition; CDT1 association with the CDC6:ORC:origin complex; Regulation of DNA replication; Activation of ATR in response to replication stress; Activation of the pre-replicative complex; CDC6 association with the ORC:origin complex; Association of licensing factors with the pre-replicative complex; E2F-enabled inhibition of pre-replication complex formation; Assembly of the ORC complex at…	0.492	0.18	3.3629e+06	1.65522e+06	High	Peak Found
Low	Q9BRN9	TM2 domain-containing protein 3 OS=Homo sapiens OX=9606 GN=TM2D3 PE=2 SV=2	4	1	1		membrane		TM2D3	15			0.492	0	1.94191e+06	954845	High	Peak Found
High	O60264	SWI/SNF-related matrix-associated actin-dependent regulator of chromatin subfamily A member 5 OS=Homo sapiens OX=9606 GN=SMARCA5 PE=1 SV=1	32	65	27	cell organization and biogenesis;metabolic process;regulation of biological process	chromosome;nucleus	catalytic activity;DNA binding;nucleotide binding;protein binding	SMARCA5	4		Recruitment and ATM-mediated phosphorylation of repair and signaling proteins at DNA double strand breaks; NoRC negatively regulates rRNA expression; B-WICH complex positively regulates rRNA expression; Deposition of new CENPA-containing nucleosomes at the centromere	0.493	14.78	3.79847e+08	1.21882e+08	High	Peak Found
High	Q9H0S4	Probable ATP-dependent RNA helicase DDX47 OS=Homo sapiens OX=9606 GN=DDX47 PE=1 SV=1	24	13	8	cell death;metabolic process;regulation of biological process;response to stimulus	cytoplasm;membrane;nucleus	catalytic activity;nucleotide binding;protein binding;RNA binding	DDX47	12		Major pathway of rRNA processing in the nucleolus and cytosol; rRNA modification in the nucleus and cytosol	0.493	10.68	1.94968e+07	9.29706e+06	High	Peak Found
High	O00592	Podocalyxin OS=Homo sapiens OX=9606 GN=PODXL PE=1 SV=2	13	11	6	cellular component movement;regulation of biological process	cytoplasm;membrane	protein binding	PODXL	7			0.493	7.63	2.28528e+07	1.13557e+07	High	Peak Found
High	Q99447	Ethanolamine-phosphate cytidylyltransferase OS=Homo sapiens OX=9606 GN=PCYT2 PE=1 SV=1	10	3	3	metabolic process	membrane	catalytic activity	PCYT2	17	Glycerophospholipid metabolism; Metabolic pathways	Synthesis of PE	0.493	0	1.92417e+06	539184	High	Peak Found
High	Q5HYI8	Rab-like protein 3 OS=Homo sapiens OX=9606 GN=RABL3 PE=1 SV=1	19	4	4	regulation of biological process;response to stimulus		nucleotide binding	RABL3	3			0.493	0.73	12361650	4.87358e+06	High	Peak Found
High	Q5VTR2	E3 ubiquitin-protein ligase BRE1A OS=Homo sapiens OX=9606 GN=RNF20 PE=1 SV=2	17	19	12	cell organization and biogenesis;metabolic process;regulation of biological process	nucleus	catalytic activity;metal ion binding;protein binding;RNA binding	RNF20	9		E3 ubiquitin ligases ubiquitinate target proteins	0.494	13.76	1.06024e+08	5.94928e+07	High	Peak Found
High	O00566	U3 small nucleolar ribonucleoprotein protein MPP10 OS=Homo sapiens OX=9606 GN=MPHOSPH10 PE=1 SV=2	10	7	6	metabolic process;regulation of biological process	chromosome;nucleus	protein binding;RNA binding	MPHOSPH10	2	Ribosome biogenesis in eukaryotes	Major pathway of rRNA processing in the nucleolus and cytosol; rRNA modification in the nucleus and cytosol	0.494	14.92	1.52832e+07	6.07874e+06	High	Peak Found
High	Q9Y399	28S ribosomal protein S2, mitochondrial OS=Homo sapiens OX=9606 GN=MRPS2 PE=1 SV=1	15	4	4	cell organization and biogenesis;metabolic process	membrane;mitochondrion;ribosome	structural molecule activity	MRPS2	9	Ribosome	Mitochondrial translation initiation; Mitochondrial translation elongation; Mitochondrial translation termination	0.494	12.06	1.60621e+07	8.36456e+06	High	Peak Found
High	Q9NZ45	CDGSH iron-sulfur domain-containing protein 1 OS=Homo sapiens OX=9606 GN=CISD1 PE=1 SV=1	49	6	4	regulation of biological process	membrane;mitochondrion	metal ion binding;protein binding	CISD1	10			0.494	16.2	2.92312e+07	1.28919e+07	High	Peak Found
High	Q96DZ1	Endoplasmic reticulum lectin 1 OS=Homo sapiens OX=9606 GN=ERLEC1 PE=1 SV=1	7	4	4	metabolic process;transport	endoplasmic reticulum;organelle lumen	protein binding	ERLEC1	2	Protein processing in endoplasmic reticulum	Hh mutants that don't undergo autocatalytic processing are degraded by ERAD; ABC-family proteins mediated transport; Defective CFTR causes cystic fibrosis; Hedgehog ligand biogenesis	0.494	10.17	7.78571e+06	4243062	High	Peak Found
Medium	Q9Y512	Sorting and assembly machinery component 50 homolog OS=Homo sapiens OX=9606 GN=SAMM50 PE=1 SV=3	2	1	1	cell organization and biogenesis;transport	cytoplasm;membrane;mitochondrion	protein binding	SAMM50	22		Cristae formation; Mitochondrial protein import; Metabolism of proteins	0.494	0	1.22209e+06	603355	High	Peak Found
High	Q13123	Protein Red OS=Homo sapiens OX=9606 GN=IK PE=1 SV=3	33	21	16	metabolic process;regulation of biological process	chromosome;cytoplasm;cytoskeleton;nucleus;spliceosomal complex	protein binding	IK	5			0.495	9.78	1.00792e+08	2.58869e+07	High	Peak Found
High	Q8N3V7	Synaptopodin OS=Homo sapiens OX=9606 GN=SYNPO PE=1 SV=2	5	5	4	regulation of biological process;response to stimulus	cytoplasm;cytoskeleton;membrane;nucleus	protein binding	SYNPO	5			0.495	17.99	4.13499e+06	3.65459e+06	High	Peak Found
High	O95453	Poly(A)-specific ribonuclease PARN OS=Homo sapiens OX=9606 GN=PARN PE=1 SV=1	9	6	6	metabolic process;regulation of biological process	cytoplasm;cytosol;nucleus	catalytic activity;metal ion binding;protein binding;RNA binding	PARN	16; CHR_HSCHR16_1_CTG1	RNA degradation	ATF4 activates genes; Deadenylation of mRNA; KSRP (KHSRP) binds and destabilizes mRNA	0.495	6.26	7.82747e+06	3.89555e+06	High	Peak Found
High	Q86TB9	Protein PAT1 homolog 1 OS=Homo sapiens OX=9606 GN=PATL1 PE=1 SV=2	7	4	4	cell organization and biogenesis;metabolic process	cytoplasm;cytosol;nucleus	protein binding;RNA binding	PATL1	11	RNA degradation	mRNA decay by 5' to 3' exoribonuclease	0.495	11.8	6.81656e+06	2.03305e+06	High	Peak Found
High	Q9BZF1	Oxysterol-binding protein-related protein 8 OS=Homo sapiens OX=9606 GN=OSBPL8 PE=1 SV=3	3	3	3	cell differentiation;cell organization and biogenesis;metabolic process;regulation of biological process;transport	cytosol;endoplasmic reticulum;membrane;nucleus	transporter activity	OSBPL8	12		Acyl chain remodelling of PS	0.495	0	3.49022e+06	656845	High	Peak Found
High	Q9NXX6	Non-structural maintenance of chromosomes element 4 homolog A OS=Homo sapiens OX=9606 GN=NSMCE4A PE=1 SV=2	5	2	2	metabolic process;regulation of biological process;response to stimulus	chromosome;nucleus	protein binding	NSMCE4A	10		SUMOylation of DNA damage response and repair proteins	0.495	0	2.15286e+06	136896	High	Peak Found	Met-loss [N-Term]
[truncated: 4,564 more rows]

## Sheet: SILAC_Peptides
Abundance Ratio Adj. P-Value: (Heavy) / (Light)	Abundance Ratio: (Heavy) / (Light)	Precursor Quan Result ID	Quan Channel	Top Apex RT [min]	Abundance Ratio Variability [%]: (Heavy) / (Light)	Sequence	Annotated Sequence	Modifications	# Protein Groups	# Proteins	# PSMs	Master Protein Accessions	Positions in Master Proteins	Theo. MH+ [Da]	Abundances (Grouped): Light	Abundances (Grouped): Heavy	Confidence (by Search Engine): Sequest HT	DeltaM [ppm] (by Search Engine): Sequest HT
[truncated: 52,253 more rows]

[truncated: 4 more sheets: TMT_Light(WT)_Proteins, TMT_Light(WT)_Peptides, TMT_Heavy(SRdef)_Proteins, TMT_Heavy(SRdef)_Peptides]
