# Supplementary material
Source: HighWire-hosted journal article supplement (doi:10.1101/rna.079643.123)
Supplement: Supplemental_DataS3_4SU-seq.xlsx [file Supplemental_DataS3_4SU-seq.xlsx]

## Sheet: TimeCourse
	A4_Cyto45min	A10_ER60min	A3_Cyto30min	A7_ER15min	B5_Cyto60min	A2_Cyto15min	B8_ER30min	B3_Cyto30min	B1_CytoControl	B7_ER15min	B9_ER45min	A5_Cyto60min	A9_ER45min	A8_ER30min	A6_ERControl	A1_CytoControl	B4_Cyto45min	B10_ER60min	B6_ERControl	B2_Cyto15min
spike-in700	403.697	207.171	556.098	361.941	642.274	577.631	519.754	757.595	1000.1	573.285	418.909	560.004	251.666	329.687	774.335	858.245	583.545	342.726	963.589	875.844
spike-in9000.42	1020.54	516.121	1692.85	1144.53	1086.16	2066.87	1923.83	1807.53	1439.53	1778.04	1717.83	2294.96	748.112	881.413	1978.54	2378.08	1859.87	1367.36	3032.63	1593.95
spike-in12000.415	0.180416	0	0.252624	0.259054	0.0731584	0.196114	0.217286	0.281657	0.491687	0.243133	0.353899	0.27441	0.0643086	0.0662231	0.290745	0.0992937	0.0823379	0.179717	0.293268	0.0488636
NR_037885.2	0	0	0	0	0	0	0.0896091	0	0	0	0	0	0	0	0	0	0	0	0	0
NR_038935.1	1.01742	1.41748	0.319603	0.55181	0.323702	0.108318	2.11476	0.551495	0.244594	0.904	1.802	0.330747	0.924056	1.24284	0.776995	0.165348	1.15354	1.76379	0.370616	0.397097
NR_026929.1	0	0	0	0	0	0	0	0	0	0	0	0	0	0	0	0	0	0	0	0
NR_026674.1	0.0261594	0.206325	0.0681396	0.249522	0.127106	0.0270119	0.142568	0.151761	0	0.140537	0.531743	0.084011	0.260754	0.114889	0.0338797	0.0113878	0.0315281	0.311428	0.12743	0.0849622
NR_024447.1	0.118354	1.5978	0.283181	1.47918	0.444162	0.384763	1.91333	0.321211	0.459753	1.93551	2.24452	0.333494	1.97265	1.83275	1.62207	0.610327	0.52994	3.53232	2.46425	0.565978
NR_026900.1	0.0181712	1.06369	0.162842	1.27777	0.0883646	0.189627	0.960018	0.0189152	0.0220124	0.488507	0.796525	0.110591	0.880489	1.33263	1.75604	0.0799775	0.0165895	0.864851	1.62414	0.0787546
NR_024491.1	0	2.1626	0.667179	1.83463	1.58964	0	4.9033	0	0.510872	3.34885	3.13729	0.816066	1.75535	3.38684	1.04465	0.245077	0	3.9186	1.59593	0.234307
NR_034032.1	5.02517	4.19031	4.04143	2.40381	3.75951	2.80131	6.39483	2.81665	2.80958	5.71553	2.82404	1.69908	4.22352	6.80369	1.82628	2.12668	3.29377	5.87706	1.25636	2.93182
NR_024492.1	0.77491	4.35574	1.30172	5.00071	0.843527	1.42633	5.48793	1.29722	1.13373	3.72632	6.22818	1.0938	4.91774	4.85889	4.53105	1.2532	0.912963	6.13966	4.42727	1.09836
NR_036530.1	0.623481	17.0569	0.952594	9.61833	0.993175	0.651811	14.4358	0.836736	0.730172	7.72709	16.3913	0.743029	18.1164	18.1831	2.34599	0.812191	1.31997	19.8467	4.24207	0.444229
NR_026806.1	0.297102	0.506256	0.520118	0.489856	0.26755	0.375025	0.53628	0.48108	0.119968	0.221865	0.786112	0.505187	0.376369	0.871547	0.212678	0.181617	0.302405	0.458254	0.107292	0.36126
NR_036505.1	0.182831	1.39139	0.776686	0.818461	0.425856	0.741494	1.16851	0.634388	0.785235	0.67677	1.67699	0.738823	1.2967	1.04054	1.42029	0.511189	0.460763	1.85074	1.96676	0.615602
NR_027046.1	0	0.0305319	0	0	0	0	0	0	0.0341192	0	0.0440934	0	0	0	0.0362916	0.0619826	0	0.055855	0	0
NR_024440.1	0.156422	0.313008	0.477503	0.608125	0.255571	0.23251	1.23946	0.645749	0	1.27131	1.70388	0.30412	0.388052	0.899193	0.173891	0.14695	0.454597	1.51691	0.277497	0.319808
NR_024456.1	0.518774	1.49941	0.740934	1.11118	0.721508	1.43071	2.79463	0.670528	0.641992	1.97831	3.2156	0.659834	2.21597	1.5243	3.95049	1.22505	0.490572	3.06927	2.84067	0.540023
NR_037869.1	0.0817016	0.769166	0.121829	0.663419	0.132055	0.0472311	0.609359	0.0282676	0.164742	0.365555	0.895926	0.110181	0.464413	0.756783	0.527535	0.179282	0.099168	1.13403	0.796281	0.0294234
NR_024413.1	0.11265	0.0490141	0.0501694	0.131105	0.0363099	0.0779014	0.073182	0.0930086	0.0541561	0.0920954	0.0704507	0	0.0977356	0.100032	0.0578281	0	0	0.178652	0.0365964	0
NR_034085.1	6.45639	16.8977	9.31238	12.9358	9.94008	8.68645	18.7749	12.2705	6.3721	11.7375	21.7747	12.4538	14.6337	15.3596	6.6638	5.37383	13.7112	19.705	10.7897	7.49311
NR_026817.1	0	0.0120827	0	0.0159954	0	0	0	0	0	0	0.0174494	0	0	0.0163486	0.014362	0	0	0	0.0362269	0
NR_026776.1	2.21367	6.90814	2.85545	4.23568	5.32805	2.39177	7.1954	2.93275	1.05639	4.50843	5.56586	1.76912	7.36124	5.90346	2.33374	1.18098	3.797	8.24778	2.72531	1.81707
NR_039988.1	0.14905	0.198425	0.163146	0.436974	0.163049	0.242979	0.745704	0.161028	0.12254	1.19023	0.355969	0.12861	0.345022	0.363928	0.269431	0.0286727	0.289124	0.225903	0.305904	0.111499
NR_036520.1	3.56488	9.32895	3.45752	6.60573	4.7857	3.53146	6.25831	3.04506	2.21304	5.11104	9.00242	3.67925	8.72548	9.32532	2.95431	2.38723	4.08988	9.15457	2.98765	2.91377
NR_034022.1	0.291288	0.878406	0.490868	0.922557	0.417149	0.481167	1.15105	0.531804	0.512051	1.11166	1.26359	0.49331	0.976724	0.877251	1.0886	0.469913	0.519599	1.23662	1.24955	0.48948
NR_046370.1	0.0206152	0	0	0	0.403434	0.406252	0	0	0.241936	0.997334	0	0	0	0	0.31386	0.235877	0.282432	0	0	0.672255
NR_073494.1	0.0579604	0.0628031	0.129694	0	0	0	0	0	0	0	0	0	0.0825903	0	0	0	0	0.114801	0.188151	0
NR_026885.1	0.101298	1.96366	0.0851047	1.23245	0.12315	0	1.25685	0.148529	0	0.748894	1.66513	0	1.97484	2.56299	0.288855	0.0835961	0.0924806	2.02136	0.370391	0.109757
NR_046273.1	0.0283349	0.0881681	0.139166	0.114972	0.0795294	0.0808133	0.0390844	0.169456	0.118337	0.273898	0.213493	0.0449649	0.371443	0.0497153	0.0956216	0.0484167	0.10926	0.221829	0.126339	0.190436
NR_046216.1	0.684793	0.860697	1.17608	1.08076	0.624645	1.40276	1.0859	1.14041	0.871152	1.42452	1.74829	0.968378	1.0536	0.852997	1.87414	1.36451	0.832007	1.28454	1.77798	1.00371
NR_105012.1	0	0	0	0	0	0	0	0	0	0	0	0	0	0	0	0	0	0	0	0
NR_026880.1	0	0	0	0	0	0	0	0	0	0	0	0	0	0	0	0	0	0	0	0
NR_026923.1	0.023773	0.150418	0.0533634	0.033588	0.0396155	0.062038	0.0370533	0.0244762	0.0289352	0.0354479	0.0410795	0.0478104	0.0981827	0.0403717	0	0	0.0433616	0.0467861	0.0772755	0.0770439
NR_046415.1	0	0.212633	0	0	0	0	0	0	0	0	0	0	0	0	0	0	0	0	0	0
NR_046369.1	0	0	0	0	0	0	0	0.360118	0	0	0	0	0.398257	0	0	0	0	0.983023	0.592345	4.88748e-05
NR_036511.1	0.325336	6.33542	0.409021	5.29985	0.394581	0.400716	4.09198	0.506781	0.608504	1.52696	5.36101	0.689201	4.81495	4.80096	2.03876	0.491053	0.385703	4.99293	2.03344	0.219793
NR_003671.2	1.36778	0.748491	0.564607	0.661857	0.513103	0.907301	0.492853	0.71429	0.642492	0.222	0.519571	0.640307	0.865618	0.691508	0.615281	0.793146	0.710326	0.606045	0.283402	0.948876
NR_038320.1	0.301462	1.0893	0.450259	1.2618	0.488658	0.393241	1.32723	0.418406	0.152161	0.776667	1.96643	0.356749	1.75432	1.14227	0.517917	0.0552846	0.389896	1.99277	0.694027	0.408294
NR_003275.2	0	0	0	0	0	0	0	0	0	0	0	0	0	0	0	0	0	0	0	0
NR_034130.1	0	0.0708426	0.0732061	0.125045	0.141243	0.0378879	0.0348751	0.0680272	0.0527773	0.0585627	0.0682059	0.0220962	0.0620906	0	0.0561377	0.0719084	0.0409194	0.0431997	0.0708013	0.0236029
NR_027053.2	0.617389	1.53699	0.604107	1.2744	0.733899	0.87282	1.89075	0.904771	1.0559	1.24159	2.1642	0.672859	1.37397	1.24897	1.55455	0.552205	0.918087	2.19037	1.85769	0.861871
NR_077244.1	0	0	0	0	0	0	0	0	0	0	0	0	0	0	0	0	0	0	0	0
NR_073404.1	0.140505	0.0874128	0.178723	0.0696502	0.48679	0.269455	0.134264	0.101244	0.0807365	0.5703	0.284061	0.141048	0.143246	0.111442	0.445901	0.363257	0.131182	0.072975	0.490588	0.1634
NR_038921.1	0	0	0	0	0.0115283	0	0	0	0	0	0	0	0	0	0	0	0	0	0	0
NR_026854.1	0.170159	0.110358	0.116112	0.19414	0.110095	0.119452	0.107674	0.035365	0.0820906	0.225626	0.105639	0.0346113	0.145473	0.0996407	0.0874418	0.0744982	0.0632812	0.0672672	0	0.149246
NR_036533.1	0.277462	0.451162	0.621619	0.597262	0.417629	0.24129	0.412477	0.391972	0.12004	0.213119	0.620529	0.381955	0.564892	0.697657	0.15322	0.109036	0.398059	0.471631	0.257657	0.429473
NR_103451.2	0	0	0.0891074	0	0	0	0	0	0	0	0	0.0823997	0	0	0	0.088145	0	0.154911	0	0
NM_001243523.1	0	0	0	0	0	0	0.253033	0	0.19146	0	0	0	0.450492	0	0	0	0.144293	0	0	0
NR_038931.1	0	0	0	0.0295611	0	0	0	0	0	0	0	0	0	0	0.0716797	0	0.0188061	0	0.0362547	0.0223193
NR_110396.1	0.533705	2.16768	0.750388	1.51002	0.328827	0.718861	2.03314	0.622214	0.834602	2.18256	2.04706	0.683167	2.11846	2.17446	1.72412	0.84544	0.44162	2.85237	1.74739	0.625572
NR_038401.1	0	0	0	0	0	0.0206876	0.0380851	0	0	0	0	0	0	0	0	0	0	0	0.038659	0
NR_027354.2	0.063696	0.342264	0.206902	0.160667	0.179994	0.273381	0.207039	0.138217	0.230049	0.0866277	0.175012	0.28656	0	0.0902329	0.216188	0.0613905	0.105965	0.552546	0.106075	0.195977
NR_027311.1	0	0	0	0.0542081	0	0	0	0	0	0	0	0	0	0	0	0	0	0	0	0
NM_001257177.1	0	0	0	0	0	0	0	0.0223653	0	0	0	0	0	0	0	0	0	0.0426082	0	0
NR_026954.1	0.035693	0.38692	0.159931	0.204887	0.0578569	0.0931192	0.342858	0.185772	0.129714	0.0719665	0.111756	0.217229	0.305207	0.235587	0.390923	0.176733	0.0977582	0.141566	0.232017	0.116021
NR_036538.1	0	0.371885	0	0.189351	0	0	0.126744	0	0.0319675	0.0709435	0.330502	0	0.376086	0.154825	0.0680058	0.145184	0.0240922	0.470993	0.0857696	0.0285929
NR_002186.1	3.67787	5.43843	3.95991	6.66152	3.32812	4.23865	6.97429	5.12938	6.22879	5.37568	7.57453	4.0747	6.84451	6.18012	6.53337	4.26297	3.84672	7.18739	8.21093	4.56533
NR_003542.1	0	0.421503	0.108891	0.278999	0	0.0845352	0.466879	0.101188	0.235513	0.26133	0.608722	0.197204	0.554144	0	0	0	0	0.578321	0.473915	0
NR_015444.1	0	0	0	0	0	0	0	0	0	0	0	0	0	0	0	0	0	0	0	0
NR_024013.1	0	0.154142	0	0	0	0	0	0	0	0	0	0	0	0	0	0	0	0	0	0
NR_024365.1	0	0	0	0	0	0	0	0	0	0	0	0	0	0	0	0	0	0	0	0
NR_027312.1	0	0	0	0.00911703	0	0.0383249	0.0352774	0.0458746	0	0.0888573	0	0.0227586	0.0314034	0.09696	0.0600561	0	0	0	0	0.0716256
NR_027417.1	0.0535147	0.113621	0	0.124625	0.0558892	0.119028	0.158817	0.0795157	0.0906553	0.289533	0.322157	0.0249318	0.187906	0.196334	0.274786	0.0810711	0.0940564	0.214628	0.162234	0.0268569
NR_110209.1	0	0	0	0	0	0	0	0	0	0	0	0	0	0	0	0	0	0	0	0
NR_039980.1	1.10807	3.03262	1.36181	2.94893	1.20096	1.9976	4.45276	1.88465	2.84631	4.11792	3.84989	1.91975	3.29053	2.61681	4.63919	2.48675	1.62682	4.71371	5.75628	1.95303
NR_033896.1	1.27621	1.71283	1.56575	1.30817	1.28061	1.42693	1.16752	1.20194	2.20854	1.96051	0.951392	1.17122	1.73218	1.96101	1.87933	2.74164	1.71994	1.80775	1.77767	1.84371
NR_026998.1	0	0.265717	0	0.0879412	0	0	0.0981075	0.0637894	0.0742341	0.247115	0	0.0621592	0.349335	0.0898829	0	0.134858	0.111892	0	0.298758	0.0663977
NR_026964.3	0	0	0	0	0	0	0	0	0	0.0250227	0	0	0.013265	0	0	0	0	0	0.0360828	0
NR_030728.1	0	0.119582	0.205079	0	0.142635	0	0.263101	0	0.0872354	0.108891	0.231428	0.0928502	0.117965	0.0589014	0.102399	0.0384666	0	0	0.0792	0
NR_109948.1	0.136151	0.17175	0.168749	0.098738	0.236095	0.156421	0.217859	0.164737	0.105924	0.235679	0.107596	0.128056	0.221944	0.157228	0.21103	0.181633	0.0887641	0.135147	0.252994	0.158324
NR_027240.1	0.172083	1.27742	0.186402	0.654829	0.24693	0.0782601	0.894376	0.09494	0.100177	0.478933	1.92028	0.104676	1.21403	1.71684	0.260766	0.0626991	0.0872672	1.33805	0.431867	0.15085
NR_033748.2	0	0	0	0	0	0	0	0	0	0	0	0	0	0	0	0	0	0	0	0
NR_026657.1	0.432887	0	0	0	0	0	0.693036	0	0	0	0	0	0	0	0	0	0.395206	0.42923	0	0
NR_046107.1	0	0.015513	0.0143495	0.0551491	0	0.0111399	0.0410164	0.0266688	0.0465532	0.0516564	0.0601624	0.0389809	0.0912804	0.0563668	0.0660231	0.0281903	0	0	0.0208172	0.0138796
NR_102268.2	0	0	0	0	0	0	0	0	0	0	0	0	0	0	0	0	0	0	0	0
NR_034127.1	2.49481	13.3949	4.24131	10.0254	4.56733	3.62446	15.7884	3.39245	1.70664	10.7706	15.9443	3.6529	14.3892	19.5541	3.47934	1.48559	3.93956	16.4814	5.10363	3.02116
NR_036691.1	0	0.0459429	0	0	0	0	0	0	0	0	0	0	0	0	0	0	0	0	0	0.0458289
NR_026877.1	0	0	0	0.0329779	0	0	0.0735807	0	0	0	0	0	0.163751	0.0337061	0	0	0.0419597	0	0	0
NR_026967.1	1.3665	3.06039	1.18808	2.57276	2.10055	1.1429	2.11098	1.26639	0.830398	2.37402	3.19075	0.932072	2.89375	3.99291	1.54763	0.54878	1.24088	4.58408	1.2367	1.21016
NR_027282.1	0.952539	1.72488	0.631185	1.74957	0.825797	0.973258	1.88092	1.52719	1.62115	1.921	2.21263	1.06245	1.14093	1.64565	1.44753	0.933329	1.24528	2.50492	2.12678	1.18609
NR_104171.1	0	0.0461083	0.0238233	0	0.0344733	0.0184946	0	0.0664138	0	0.0285869	0.0998823	0.0215722	0.030309	0.0623873	0.0274031	0.023401	0	0.0421751	0	0.0230431
NR_110248.1	0.0556702	0.0929312	0.470895	0.362442	0.191881	0.20614	0.471363	0.289635	0.068329	0.512771	0.775764	0.0847062	0.159531	0.0823215	0.1876	0	0.255397	0.565906	0.2261	0.335045
NR_110737.1	0	0	0	0	0	0	0	0	0	0	0	0	0	0	0	0	0	0	0	0
NR_110738.1	0	0	0	0	0	0	0	0	0	0	0	0	0	0	0	0	0	0	0	0
NR_110804.1	0.157305	0.13827	0	0.0948629	0	0.098055	0.324744	0.080787	0.028242	0.418641	0.243013	0.0465116	0.0334317	0.419716	0.117923	0.132384	0.0992297	0.279138	0.113879	0.0316986
NR_120363.1	0.146368	0.656252	0.240831	0.71234	0.375077	0.206298	0.741233	0.187117	0.162164	0.605074	1.13253	0.0869902	0.383901	0.664194	0.727249	0.263936	0.161989	1.14519	0.617065	0.155603
NR_120402.1	0	0	0	0	0	0	0	0	0	0	0	0	0	0	0	0	0	0	0	0
NR_024498.1	0.246498	1.48079	0.254442	1.03603	0.302094	0.265926	0.861337	0.106258	0.372967	0.583214	0.923569	0.190799	1.07858	1.49249	0.879242	0.149165	0.248642	1.48155	0.883324	0.403558
NR_120424.1	0.388419	1.06457	0.637109	0.603551	0.808766	0.48587	1.60166	0.479078	0.504706	1.19391	1.38062	0.428107	0.79897	0.814058	1.01748	0.290742	0.387951	1.82847	0.795645	0.510964
NR_120422.1	0	0	0	0	0	0	0	0	0	0	0	0	0	0	0	0	0	0	0	0
NR_120450.1	0.0203774	0	0.0228031	0.0292155	0.0330318	0.0177049	0.0326429	0	0	0.109583	0	0	0.058023	0.0298617	0	0	0.0371653	0	0	0
NR_120606.1	0	0	0.0557405	0	0	0	0.159328	0	0	0	0.0778999	0.100947	0	0	0	0	0	0	0	0.0539152
NR_120653.1	0.0268708	0.084405	0.0867748	0.149255	0.124298	0.155114	0.426403	0.118472	0.0319414	0.290599	0.164923	0.0801728	0.244559	0.346991	0.239504	0.0850223	0.140855	0.269439	0.208771	0.028449
NR_121579.1	0.184049	4.89558	0.282003	2.82553	0.293611	0.276471	4.27121	0.394465	0.150212	2.44451	4.24249	0.259876	5.44333	6.97194	0.635904	0.544448	0.290979	2.70814	1.02553	0.270884
NR_121582.1	0.147049	0.282958	0.0915138	0.118355	0.108829	0.141762	0.233934	0.085032	0.0592814	0.359826	0.205478	0.0499199	0.339552	0.24651	0.315572	0.128794	0.0827201	0.34339	0.214861	0.053214
NR_121623.1	0	0	0	0	0	0	0	0	0.0948768	0	0.122613	0	0	0	0	0	0	0	0	0
NR_122121.1	3.24225	11.756	6.13671	12.9958	11.4172	4.56964	13.7822	4.4224	2.43783	11.8722	9.97654	4.19598	11.1534	18.8583	2.44899	1.23019	4.89935	9.75543	3.08869	4.23982
NR_125390.1	0	0	0	0	0	0	0	0	0	0	0	0	0	0	0	0	0	0	0	0
NR_125428.1	0.0726843	0.0718761	0	0	0	0	0	0.0765357	0	0	0	0.0652278	0	0.191788	0	0	0	0	0.0103394	0
NR_125855.1	0.229673	0.60534	0	0	0	0	0.179952	0	0	0.616928	0.176547	0.232413	0.480094	0	0.145477	0.380824	0.208802	1.13085	0.181911	0
NR_125868.1	0.0733524	0	0	0	0	0	0	0	0	0.197197	0	0	0	0	0.0945156	0.161424	0	0	0.119204	0
NR_125862.1	0	0	0	0.0504834	0	0	0.0563195	0	0	0	0.0550726	0	0	0	0	0	0	0	0	0
NR_125894.1	0	0	0	0	0	0	0	0	0.0292129	0	0	0	0	0	0	0	0	0	0	0
NR_125895.1	0	0	0	0	0	0	0	0	0	0	0	0	0	0	0	0	0	0	0	0
NR_125909.1	0	0.0375186	0	0	0.0280512	0.0150492	0	0	0.0209633	0.0465226	0.0270916	0.0351068	0.0493252	0.0253825	0.0232121	0	0	0	0	0
NR_039650.1	0	0	0	0	0	0	0	0	0	0	0	0	0	0	0	0	0	0	0	0
NR_120521.1	0	0	0	0.0710066	0	0.129088	0	0.103011	0	0	0	0.0501893	0.0705161	0.145149	0.0637554	0.108888	0.0903456	0	0	0
NR_039766.1	0	0	0	0	0	0	0	0	0	0	0	0	0	0	0	0	0	0	0	0
NR_037436.1	0	0	0	0	0	0	0	0	0	0	0	0	0	0	0	0	0	0	0	0
NR_036243.1	0	0	0	0	0	0	0	0	0	0	0	0	0	0	0	0	0	0	0	0
NR_028471.1	0	0	0	0	0	0	0	0	0	0	0	0	0	0	0	0	0	0	0.108936	0
NR_027251.1	0.0628135	1.36183	0.175907	1.35212	0.101818	0	0.905058	0	0.0380457	0.422162	1.3767	0.0637142	1.6561	1.6123	0.364213	0	0.0286729	1.05881	0.306232	0.0680588
NR_047029.1	0	0	0	0	0	0	0	0	0	0	0	0	0	0	0	0	0	0	0	0
NR_047015.1	0	0	0	0	0	0	0	0	0	0	0	0	0	0	0	0	0	0	0	0
NR_046547.1	0	0	0	0	0	0	0	0	0	0	0	0	0	0	0	0	0	0	0	0
NR_039784.2	0	0	0	0	0	0	0	0	0	0	0	0	0	0	0	0	0	0	0	0
NR_045529.3	0	0	0	0	0	0	0	0	0	0	0	0	0	0	0.0132154	0	0	0	0	0
NR_110525.1	0	0	0	0	0	0	0	0	0	0	0	0	0	0	0	0	0	0	0	0
NR_037839.1	0	0	0	0	0	0	0	0	0	0	0	0	0	0	0	0	0	0	0	0
NR_003082.1	0.241625	0.397509	0.203818	0.463751	0.250792	0.212275	1.19955	0.258835	0.157038	1.79746	0.724437	0.195498	0.560891	0.884322	0.266628	0.0865369	0.519214	0.583566	0.271844	0.17846
NR_125932.1	0.0367461	0.120048	0	0	0	0.0319572	0.0588723	0	0	0	0.0576604	0.0371962	0.10494	0	0	0	0	0.0732765	0.059698	0
NR_037184.1	0	0	0	0	0	0	0	0	0	0	0	0.134241	0	0	0	0	0	0	0	0
NR_103717.1	0	0	0	0	0	0	0	0	0	0	0	0	0	0	0	0	0	0	0	0
NR_027080.2	0	0	0.0459132	0	0	0.106931	0.0656186	0	0.049651	0	0.128331	0.0415747	0	0	0.0528123	0	0	0	0	0
NR_126347.1	0	0	0	0.131362	0	0	0	0	0	0	0	0	0	0	0	0	0	0	0	0
NR_126360.1	0	0	0	0	0	0	0	0	0	0	0	0	0	0	0	0	0	0	0	0
NR_126379.1	0	0	0	0.151572	0	0	0	0	0	0	0	0	0	0	0	0	0	0	0.171642	0
NR_126377.1	0	0	0	0	0	0	0	0	0	0	0	0	0	0	0	0	0	0	0	0
NR_126390.1	0.242209	0.5431	0.244148	0.579199	0.263723	0.168384	0.822421	0.389984	0.234559	0.585725	0.80822	0.192678	0.612186	0.596199	0.594185	0.295447	0.270722	0.668395	0.674467	0.312684
NR_126392.1	0	0	0	0	0	0	0	0	0	0	0	0	0	0	0	0	0.125747	0.273147	0	0
NR_126452.2	0.13001	0.279077	0.254029	0.407427	0.336939	0.270824	0.869537	0.364986	0.305401	0.565132	0.536524	0.21555	0.459716	0.882353	0.380765	0.464435	0.223818	1.05806	0.596286	0.165807
NR_049849.1	0	0	0	0	0	0	0	0	0	0	0	0	0	0	0	0	0	0	0	0
NR_049883.1	0	0	0	0	0	0	0	0	0	0	0	0	0	0	0	0	0	0	0	0
NR_049882.1	0	0	0	0	0	0	0	0	0	0	0	0	0	0	0	0	0	0	0	0
NR_027695.1	0	0.0849017	0	0	0	0	0	0	0	0	0	0	0	0	0	0	0	0	0	0
NR_125806.1	0.993574	1.55575	1.29849	0.871347	0.268424	0.912046	0.706966	0.804419	0.936133	0.296786	0.864141	0.951832	0.865329	0.971549	1.42248	0.789577	0.957482	0.766252	0.35881	0.717695
NR_003945.1	0.104287	0.159791	0.116677	0.24173	0.18028	0.0861417	0.356617	0.120483	0.1641	0.331776	0.318879	0.159013	0.25446	0.323459	0.372721	0.138333	0.100948	0.311529	0.27601	0.129851
NR_031690.1	0	0	0	0	0	0	0	0	0	0	0	0	0	0	0	0	0	0	0	0
NR_030384.1	0	0	0	0	0	0	0	0	0	0	0	0	0	0	0	0	0	0	0	0
NR_031735.1	0	0	0	0	0	0	0	0	0	0	0	0	0	0	0	0	0	0	0	0
NR_030194.1	0	0	0	0	0	0	0	0	0	0	0	0	0	0	0	0	0	0	0	0
NR_030307.1	0	0	0	0	0	0	0	0	0	0	0	0	0	0	0	0	0	0	0	0
NR_039793.1	0	0	0	0	0	0	0	0	0	0	0	0	0	0	0	0	0	0	0	0
NR_030337.1	0	0	0	0	0	0	0	0	0	0	0	0	0	0	0	0	0	0	0	0
NR_036145.1	0	0	0	0	0	0	0	0	0	0	0	0	0	0	0	0	0	0	0	0
NR_036143.1	0	0	0	0	0	0	0	0	0	0	0	0	0	0	0	0	0	0	0	0
NR_031658.1	0	0	0	0	0	0	0	0	0	0	0	0	0	0	0	0	0	0	0	0
NR_030363.1	0	0	0	0	0	0	0	0	0	0	0	0	0	0	0	0	0	0	0	0
NR_030356.1	0	0	0	0	0	0	0	0	0	0	0	0	0	0	0	0	0	0	0	0
NR_031642.1	0	0	0	0	0	0	0	0	0	0	0	0	0	0	0	0	0	0	0	0
NR_031708.1	0	0	0	0	0	0	0	0	0	0	0	0	0	0	0	0	0	0	0	0
NR_030589.1	0	0	0	0	0	0	0	0	0	0	0	0	0	0	0	0	0	0	0	0
NR_030581.1	0	0	0	0	0	0	0	0	0	0	0	0	0	0	0	0	0	0	0	0
NR_039659.1	0	0	0	0	0	0	0	0	0	0	0	0	0	0	0	0	0	0	0	0
NR_031604.1	0	0	0	0	0	0	0	0	0	0	0	0	0	0	0	0	0	0	0	0
NR_031746.1	0	0	0	0	0	0	0	0	0	0	0	0	0	0	0	0	0	0	0	0
NR_030408.1	0	0	0	0	0	0	0	0	0	0	0	0	0	0	0	0	0	0	0	0
NR_030309.1	0	0	0	0	0	0	0	0	0	0	0	0	0	0	0	0	0	0	0	0
NR_031677.1	0	0	0	0	0	0	0	0	0	0	0	0	0	0	0	0	0	0	0	0
NR_030331.1	0	0	0	0	0	0	0	0	0	0	0	0	0	0	0	0	0	0	0	0
NR_030628.1	0	0	0	0	0	0	0	0	0	0	0	0	0	0	0	0	0	0	0	0
NR_037442.1	0	0	0	0	0	0	0	0	0	0	0	0	0	0	0	0	0	0	0	0
NR_030760.1	0	0	0	0	0	0	0	0	0	0	0	0	0	0	0	0	0	0	0	0
NR_039933.1	0	0	0	0	0	0	0	0	0	0	0	0	0	0	0	0	0	0	0	0
NR_030289.1	0	0	0	0	0	0	0	0	0	0	0	0	0	0	0	0	0	0	0	0
NR_031715.1	0	0	0	0	0	0	0	0	0	0	0	0	0	0	0	0	0	0	0	0
NR_031752.1	0	0	0	0	0	0	0	0	0	0	0	0	0	0	0	0	0	0	0	0
NR_031667.1	0	0	0	0	0	0	0	0	0	0	0	0	0	0	0	0	0	0	0	0
NR_030362.1	0	0	0	0	0	0	0	0	0	0	0	0	0	0	0	0	0	0	0	0
NR_031646.1	0	0	0	0	0	0	0	0	0	0	0	0	0	0	0	0	0	0	0	0
NR_030348.1	0	0	0	0	0	0	0	0	0	0	0	0	0	0	0	0	0	0	0	0
NR_030395.1	0	0	0	0	0	0	0	0	0	0	0	0	0	0	0	0	0	0	0	0
NR_031710.1	0	0	0	0	0	0	0	0	0	0	0	0	0	0	0	0	0	0	0	0
NR_031624.1	0	0	0	0	0	0	0	0	0	0	0	0	0	0	0	0	0	0	0	0
NR_039871.1	0	0	0	0	0	0	0	0	0	0	0	0	0	0	0	0	0	0	0	0
NR_039794.1	0	0	0	0	0	0	0	0	0	0	0	0	0	0	0	0	0	0	0	0
NR_030280.1	0	0	0	0	0	0	0	0	0	0	0	0	0	0	0	0	0	0	0	0
NR_030626.1	0	0	0	0	0	0	0	0	0	0	0	0	0	0	0	0	0	0	0	0
NR_030641.1	0	0	0	0	0	0	0	0	0	0	0	0	0	0	0	0	0	0	0	0
NR_030322.1	0	0	0	0	0	0	0	0	0	0	0	0	0	0	0	0	0	0	0	0
NR_031635.1	0	0	0	0	0	0	0	0	0	0	0	0	0	0	0	0	0	0	0	0
NR_031683.1	0	0	0	0	0	0	0	0	0	0	0	0	0	0	0	0	0	0	0	0
NR_036140.1	0	0	0	0	0	0	0	0	0	0	0	0	0	0	0	0	0	0	0	0
NR_049832.1	0	0	0	0	0	0	0	0	0	0	0	0	0	0	0	0	0	0	0	0
NR_030279.1	0	0	0	0	0	0	0	0	0	0	0	0	0	0	0	0	0	0	0	0
NR_030340.1	0	0	0	0	0	0	0	0	0	0	0	0	0	0	0	0	0	0	0	0
NR_126517.1	0	0	0	0	0	0	0	0	0	0	0	0	0	0	0	0	0	0	0	0
NR_002954.1	0	0	0	0	0	0	0	0	0	0	0	0	0	0	0	0	0	0	0	0
NR_030342.1	0	0	0	0	0	0	0	0	0	0	0	0	0	0	0	0	0	0	0	0
NR_031685.1	0	0	0	0	0	0	0	0	0	0	0	0	0	0	0	0	0	0	0	0
NR_033926.1	141.203	83.8156	147.04	84.46	123.137	149.824	79.0641	112.853	113.84	80.3197	71.995	153.313	89.5332	68.3806	106.088	137.091	98.0942	69.1843	86.7973	117.852
NR_130727.1	0	0	0	0.0282554	0	0	0	0	0	0.0541178	0	0.027552	0	0	0	0	0	0	0.0456475	0
NR_130768.1	0.562793	0.64821	0.418961	0.973678	0.847104	0.699175	0.837294	0.711371	0.552966	0.975157	1.1511	0.735371	1.31028	1.16606	0.890583	0.442328	0.623905	1.30152	0.480013	0.47912
NR_130772.1	0.00937451	0.0436507	0.0567806	0.0470804	0.0826863	0.00960447	0.0712427	0.0319495	0.0163176	0.077561	0.11631	0.0347731	0.0455086	0.0480373	0.0315579	0.0124767	0.0293418	0.114807	0.0535724	0.0302475
NR_130771.1	0	0	0	0	0	0	0	0	0	0	0	0	0	0	0	0	0	0	0	0
NR_046619.1	0	0	0	0	0	0	0	0	0	0	0	0	0	0	0	0	0	0	0	0
NR_047025.1	0	0	0	0	0	0	0.123776	0	0	0	0	0	0	0.115446	0	0	0.0705234	0	0.1257	0
NR_126560.1	0.135487	0	0	0	0	0	0	0	0	0	0	0.249099	0	0	0	0	0	0	0	0
NR_039667.1	0	0	0	0	0	0	0	0	0	0	0	0	0	0	0	0	0	0	0	0
NR_003138.3	0.527661	10.2101	0.734101	7.7139	0.748197	0.687603	9.43231	0.472825	0.634042	8.4106	7.25428	0.274786	10.7717	12.5376	1.45526	0.819098	0.543693	11.3713	1.98701	0.290233
NR_026808.1	0.12161	0.150628	0.11925	0.16569	0.158616	0.340408	0.358522	0.0800048	0.0942945	0.4888	0.49064	0.112119	0.0926093	0.229182	0.490661	0.246858	0.152341	0.680283	0.204377	0.125523
NR_024277.1	0	0.0303461	0.0313627	0	0	0	0.0448218	0	0.0339135	0	0	0.0284115	0	0.0821415	0.0360727	0	0	0	0.0909845	0
NR_046820.1	0	0	0	0	0	0	0	0	0	0	0	0	0	0	0	0	0	0	0	0
NR_104158.1	0	0	0	0	0	0	0	0	0	0	0	0	0	0	0	0	0	0	0	0
NR_126441.1	0	0.218988	0.533845	1.01731	0.843969	0.263535	0.901724	0.686946	0.489433	1.44786	0.316256	0.582541	0.676809	0.566883	0.650773	0.314456	0.310196	1.08747	0.343829	0.833635
NR_024615.1	0.0223603	0.124709	0.13625	0.10092	0.0401804	0.0583358	0.259199	0.0947576	0.027087	0.490612	0.0350054	0.0907239	0.0318668	0.204102	0.289628	0.0250872	0.142898	0.229191	0.266691	0.0242275
NR_027715.1	0.0306445	0.130273	0.0960595	0.0410012	0.139226	0.0994822	0.114335	0.0302301	0.138697	0.269601	0.200387	0.174354	0.122519	0.294067	0.110717	0.0315351	0.0522509	0.455983	0.139786	0.156646
NR_026812.1	0.0392344	0.142482	0.0550117	0.0666936	0	0	0.0658168	0	0	0.0812617	0.061787	0.039651	0.485962	0	0.060554	0.0539104	0.0340505	0.176975	0	0
NR_024560.1	0	0	0	0	0	0	0	0	0	0	0	0	0	0	0	0	0	0	0	0.0174705
NR_046218.1	0	0	0	0	0	0	0	0	0	0	0	0	0	0	0	0	0	0	0	0
NR_003934.1	0.0961955	0.206483	0.15012	0.284865	0.209273	0.24146	0.44182	0.296375	0.493485	0.694758	0.468244	0.235453	0.362815	0.501645	0.233882	0.598355	0.44702	0.374805	0.841815	0.758435
NR_077215.1	0.0276166	0.0898111	0	0.0396316	0.0447655	0	0.0442131	0	0.033505	0	0	0	0.0787157	0.0405902	0	0.0303874	0	0	0.0897588	0
NR_120396.1	0	0	0	0	0	0	0	0	0	0	0	0	0	0	0	0	0	0	0	0
NR_027420.1	0.62148	1.52324	0.773026	1.38339	0.756155	0.820765	1.9415	0.913946	1.41157	1.70543	2.25941	0.846218	1.38864	0.912994	1.67088	0.8894	0.800602	2.50901	2.60826	1.08129
NM_001287812.1	0.0958039	0.102683	0	0	0	0	0.452537	0.0992165	0	0.129067	0	0	0	0.142497	0.12482	0	0	0.187043	0.311987	0.207345
NM_153478.2	31.1924	15.6284	26.188	17.0098	38.1851	29.6589	18.8084	33.3437	45.3743	20.4192	17.6746	28.8452	21.4336	17.2026	20.6209	31.2611	36.9235	13.4712	17.8908	41.9837
NM_001288707.1	0.0679293	0.862444	0.460384	0.931837	0.583744	0.42755	1.34511	0.404668	0.388541	1.8466	1.08253	0.416971	1.08171	0.888012	0.726382	0.413522	0.62288	1.44079	0.79891	0.643246
NR_126421.1	0	0	0	0	0	0	0	0	0	0.0938959	0	0	0	0	0	0	0.0435102	0	0	0
NR_126515.1	0	0	0	0	0	0	0	0.108946	0.174511	0	0.242616	0	0	0	0	0	0.0543056	0	0.0319349	0
NR_027006.1	0	0	0	0	0	0	0	0	0	0	0	0	0	0.0890819	0	0	0	0	0	0
NR_130112.1	6.70573	10.3742	8.11677	17.0069	5.00753	3.02526	9.47326	12.2082	9.72596	17.3489	16.9493	7.30298	5.30229	7.96315	11.085	7.91504	5.19363	11.3934	13.2958	6.86644
NR_130113.1	0.764632	0	0	0	4.51716e-07	0	0	3.34256e-07	0	0	0	0.841734	0	0	0.000670529	1.33849	0	0	0	5.16229e-06
NR_130114.1	2.28453e-07	3.45577	3.45303	2.38648	2.81273	0	7.31826	1.19473	4.02235	1.7947	3.1408	7.27406e-08	1.56802	3.25778	0.818494	1.99712e-06	5.08275	6.55105	2.21752	2.70848
NR_130642.1	0	0	0	0	0	0	0	0	0	0	0	0	0	0	0	0	0	0	0	0
NR_130643.1	0.204327	0.901071	0.532193	1.56928e-07	0.720036	0.191999	0.323254	0	0.131575	0.569495	0.587778	0.0204923	0.430817	0	0.157762	0.333387	0.425877	0.751571	0.356014	0.392641
NR_130649.1	0.48309	1.25279	0.663142	1.35614	0.303078	1.01976	0.9585	0.546506	0.956153	0.785959	1.1102	0.706108	1.02425	0.977535	1.15587	0.984883	0.845854	1.26688	1.13739	0.766918
NR_130705.1	0	0	0	0.211789	0	0	0	0	0	0	0	0	0.100714	0	0	0	0	0	0	0
NR_130714.1	0.0561694	0	0	0	0	0	0	0	0	0	0	0	0	0	0.0660342	0	0	0	0	0
NR_130715.1	0	0	0	0	0	0	0	0	0	0	0	0	0	0	0	0	0	0	0	0
NR_130907.1	0	0	0	0	0	0	0	0	0	0	0	0	0	0	0	0	0	0	0	0
NR_130911.1	1.29068	5.70707	0	1.26037	1.25168	2.36656e-10	1.2109	0	0	3.08181	3.87499	0.480467	4.23778	4.24024	0	0.658511	1.56311	8.69163	1.62535	6.78914e-10
NR_130976.1	3.8508e-08	0	4.56188e-08	0	0	3.99322e-08	0	0	0	0	0	0.202737	0	0	0	0	0	0	0	0
NR_130978.1	3.8715e-09	0	3.69302e-09	0	0	3.31472e-09	0	0	0	0	0	0.0135024	0	0	0	0	0	0	0	0
NR_046097.1	0.10988	0.452039	0.0865878	0.310068	0	0.211218	0.212914	0.287163	0.275557	0.430549	0	0.234073	0.604468	0.134018	0.541876	0	0.157405	0.445823	0.460819	0.0996346
NR_104674.1	0	0	0	0	0	0	0	0	0	0	0	0	0	0	0	0	0	0	0	0
NR_046100.1	0	0	0.0155265	0.0596724	0	0	0.0229644	0	0	0	0	0	0	0	0	0.0152512	0	0	0	0.015018
NR_033912.1	0.00887638	0.0192444	0	0.0254763	0	0	0	0.00923979	0.0215054	0.0119314	0.0416883	0.027011	0.0506007	0.0130194	0.0228747	0	0	0.0176028	0	0
NR_033913.1	0.0791165	0.0204014	0.145475	0.0277463	0.0325893	0.104327	0.0892226	0.0221312	0.0460275	0.0553245	0.0327932	0.0875341	0.0748057	0.0575732	0.141938	0.0892876	0.0222352	0.228168	0.0662942	0.0261772
NR_029411.1	17.7238	27.5371	21.711	19.9732	21.8398	20.275	21.6852	21.8853	18.6202	16.0471	21.9536	20.7858	23.388	21.3786	20.2394	16.0087	18.5755	22.8607	19.4488	18.6238
NR_034078.1	0	1.23611e-06	0	0	0	0	0	0	0	0	0	0	0	0	0	0	0	0	0	0
NR_034079.1	0	0.150251	0	0	0	0	0	0	0	0	0	0	0	0	0	0	0	0	0	0
NR_034161.1	0	0.1126	0.116357	0	0	0	0	0.108756	0	0.139623	0	0.105362	0	0	0	0	0	0	0	0.225093
NR_109874.1	0.165492	0.686771	0	1.06871	0	0	0	0	0	0.66735	1.03632	0	0	0	0	0.364192	0	0	0	0
NR_029192.1	1.55129	1.08812	1.07331	1.1131	1.03542	0.833238	1.0337	1.27597	1.05015	0.569007	1.14286	0.862513	1.30048	1.31147	0.41153	1.05428	0.791439	1.62867	0.741466	0.889853
NR_038253.1	1.29549	1.68771	1.94403	2.54434	1.05286	1.44557	2.22259	2.51545	1.8741	0.846063	2.8345	0.868063	3.59376	2.79687	2.58607	1.22366	1.93594	1.95831	2.30906	1.82788
NR_038254.1	0.683724	2.08459	0.000325976	0.0489366	1.7281e-05	0.106833	0.109164	2.6082e-07	0.425721	3.06495e-10	0.525409	0.232992	0.0362875	0	0.387148	0	0.467153	0.0253798	1.79371e-09	0.514031
NR_110246.1	0	0	0	0	0	0	0	0	0	0	0	0	0	0	0	0	0	0	0	0
NR_038255.1	0	0.516398	0.39841	0.528958	0.299683	1.20986	0	3.42261e-07	0.106793	1.00618	0.00034069	0.44637	0.000986409	0	0.00177342	0.366525	0	1.38227	0.488697	0.00771509
NR_077227.1	0	0.0117027	0	0	0	0	0	0	0.0130776	0	0	0	0	0	0	0	0	0	0	0
NR_110247.1	0	0	0	0	0	0	0	0	0	0	0	0	0	0	0	0	0	0	0	0
NR_027089.2	0	0	0	0	0	0	0	0	0	0	0	0	0	0	0	0	0	0	0	0
NR_026658.1	0	0.231213	0.0796422	0.204058	0.208555	0.0618284	0	0	0.172252	0	0	0	0.101324	0.0440167	0	0	0.0649085	0	0	0
NR_040091.1	0.414458	0.529721	0.604392	0.268621	0.277931	0.554067	0.61844	0.393192	0.459774	0.272664	0.852396	0.256165	0.424529	0.926104	0.39857	0.403926	0.398707	0.544507	0.505436	0.444097
NR_046289.1	3.1253	0	0	1.36652e-06	1.38971e-07	3.31689	0	1.71159	1.03808	0	2.36577	0.835829	0	4.23555	0	5.81668e-08	2.36022	2.11846	0	0
NR_046288.1	0	1.49405	0.733125	0	1.34381	1.35561	4.2124	1.4055	1.5767	0.563816	1.37571	0	1.62562	1.16264	0.663697	0.912196	1.43277	0	1.39552	0
NR_046290.1	0	4.42688	3.48188	4.27483	1.37228	0	1.10094	1.77813	2.2052	4.56495	0	1.89006	3.28178	1.11379	3.50533	1.95581	1.29435	2.28514	4.3422	4.23623
NR_036486.1	0	0	0	0	0	0	0	0	0	0	0	0	0	0	0	0	0	0	0	0
NR_034086.1	3.60776	1.18927	2.1797	1.36448	2.47866	2.00599	0.000173872	2.04117	0.772344	6.66504	0.752343	2.09249	1.47867	2.81797	2.48434	0.804691	2.68081	2.04911	1.53237	1.81957
NR_034133.1	3.06968	4.24935	3.16307	3.22786	2.84419	3.84425	3.53833	4.17201	4.55924	3.53966	3.64309	3.48514	3.95615	3.4929	3.96479	2.91321	4.17645	4.46099	4.06812	4.48403
NR_040095.1	0	0	0	0	0	0	0	0	0	0	0	0	0	0	0	0	0	0	0	0
NR_110255.1	0	0.0538245	0	0.041556	0	0	0.0473362	0	0	0	0.0744612	0	0.0839281	0	0.0606104	0.0419318	0	0.0917289	0.0759853	0
NR_046114.1	0	0.0465893	0.0160479	0	0	0	0	0.0149126	0	0.0385135	0.0224277	0	0	0	0	0	0	0	0	0
NR_105008.1	0	0	0	0	0	0	0	0	0	0	0	0	0	0	0	0	0	0	0	0
NR_029393.1	0	0.130325	0.0628004	0	0	0.0244929	0.187967	0	0	0	0	0	0.255253	0	0	0	0	0	0.221321	0
NR_110216.1	0	0	0	0	0	0	0	0	0	0	0	0	0	0	0	0	0	0	0	0
NR_046116.1	0	0	0	0	0	0	0	0	0	0	0	0	0	0	0	0	0	0	0	0
NR_037585.1	1.59629e-09	9.70138e-08	0	1.74374e-07	2.89462e-09	9.29214e-10	2.01368e-08	0	1.10938e-08	1.43128e-08	1.36774e-08	0	1.41246e-08	1.97668e-08	4.99205e-09	0	9.32078e-09	9.59267e-08	0	0
NR_024102.1	0	0	0	0	0	0	0	0	0	0	0	0	0	0	0	0	0	0	0	0
NR_037586.1	0.103384	3.58625	0	2.81888	0.167581	0.269717	1.65513	0	0.465244	0.416898	1.94218	0.104866	2.06272	2.27457	1.33211	0.113756	0.283154	1.64016	1.17605	0.112017
NR_024453.2	0.368885	0.326427	0.46433	0.675688	0.467059	0.379747	0.734617	0.468365	0.304198	1.06187	0.963572	0.565225	0.713914	1.11152	0.489314	0.234524	0.52798	1.46989	0.718952	0.344302
NR_105056.2	0	0	0	0	0	0	0	0	0	0	0	0	0	0	0	0	0	0	0	0
NR_108080.1	0.198142	0.322186	0.0554892	0.0710866	0	0.0861554	0	0.103127	0.0600066	0	0.155097	0.150738	0	0.145312	0.127655	0	0.180895	0	0	0.107344
NR_110185.1	0	0	0	0	0	0	0	0	0	0	0	0	0	0	0	0	0	0.904503	0	0
NR_047662.2	0.084248	0.519139	0.183649	0.518045	0.217297	0.206727	0.8245	0.137872	0.346207	0.53284	0.835525	0.157197	0.657083	0.65536	0.360161	0.197027	0.137614	0.894777	0.585541	0.172734
NR_033841.1	0	0	0	0	0.0360617	0	0	0	0	0	0	0	0.063411	0	0	0.0489584	0	0	0	0.0241049
NR_104132.1	0	0	0	0	0	0	0	0	0	0	0	0	0	0	0	0	0	0	0	0
NR_110730.1	0.765235	4.62797	1.38605	3.22827	1.70338	1.51599	2.99791	0.792004	1.21202	3.18098	2.82328	0.772187	3.51139	4.54903	3.51526	1.08756	0.593941	4.31258	4.03151	0.877092
NR_110744.1	0.0768965	0.593702	0.275029	0.403297	0.11537	0.190378	0.787166	0.222264	0.339868	0.608175	1.11145	0.275902	0.624113	0.561434	0.397759	0.156044	0.291639	1.07315	0.462795	0.257058
NR_110803.1	0	0.482327	0.148142	0	0	0.193468	0.601727	0.309076	0.673745	0.451371	0.19975	0	1.11464	0.540186	0	0.244792	0.681051	0.499454	0.362785	0.178024
NR_026847.1	0	0.0667129	0	0.181711	0.0410501	0	0.243261	0	0.0306777	0.136163	0.172113	0.0256877	0.217582	0.0742894	0.195786	0.0561587	0.0231201	0.301327	0.246927	0.0823178
NR_102752.1	2.70178	10.6407	3.84219	8.04158	3.38678	3.39163	7.3836	4.37055	2.5009	3.61659	8.60558	3.96177	9.06374	9.44036	4.28623	2.36143	3.79304	11.8905	3.94461	3.62192
NR_110809.1	0.0845905	0.184018	0.132356	0.274747	0.212718	0.133405	0.296339	0.0991963	0.186231	0.237782	0.464694	0.0250471	0.14983	0.320175	0.168241	0.114725	0.117881	0.329912	0.239385	0.114817
NR_033852.1	0	0.0587729	0	0.0520482	0.0585212	0.0314553	0.116403	0.0375837	0.0219043	0.121624	0.176936	0.018315	0.0273937	0.0266159	0.0465438	0.0402328	0.131846	0.154594	0.0880319	0.0195619
NR_002821.2	2.62025	4.94877	1.77729	4.90905	3.46832	4.03859	3.63244	2.9442	1.45279	3.45667	4.55167	3.92269	4.27565	5.01524	4.14954	4.52267	2.90926	4.22546	4.24515	1.76358
NR_038917.1	0	0	0	0	0	0	0	0	0	0	0	0	0	0	0	0	0	0	0	0
NR_110877.1	0	0	0	0	0	0	0	0	0	0	0	0	0	0	0	0	0.141744	0	0	0
NR_024264.1	0	0.0177194	0	0	0	0	0	0	0	0	0	0	0.0232955	0	0	0	0	0	0	0
NR_024279.1	2.63291	8.252	3.34841	5.45079	4.20129	2.41986	7.65633	2.9116	1.53336	7.29777	7.33132	2.3017	8.36161	10.5109	2.22401	1.25295	3.70399	10.0167	2.98924	2.0369
NR_024280.1	0	0	0	0	0	0	0	0	0	0	0	0	0	0	0	0	0	0	0	0
NR_103772.1	0.624482	1.55765	0.46261	2.25768	0	1.30059	1.67645	1.16459	0.946471	0.600391	1.19698	0.277511	1.68216	0.858252	2.25322	1.17631	0.297688	1.01123	1.48637	0.433202
NR_040029.1	0.0194215	0.0719067	0.0216867	0	0	0	0	0	0.0937994	0.0275474	0.131346	0	0.0551211	0.14161	0.0557212	0.030648	0.021102	0.202062	0.0691808	0
NR_024374.1	0.953808	5.09396	1.54458	4.46214	1.27781	1.36089	3.69382	1.76388	1.43707	3.21414	3.66719	0.841861	4.87709	4.41017	3.45482	1.18578	1.07156	4.65599	3.11675	1.25382
NR_026682.1	0.897891	3.08364	1.52844	2.88243	0.875051	1.23395	4.02673	1.36116	1.58136	3.36834	3.36445	1.62905	3.3569	3.44865	1.82002	0.942077	1.35855	4.04143	2.41075	1.54314
NR_026943.1	0.395838	2.10101	0.464869	1.8874	0.300121	0.510798	1.5843	0.405399	0.586964	1.13281	1.67916	0.472751	1.7816	1.8167	2.07308	0.63928	0.308921	2.42145	2.00244	0.399001
NR_103852.1	0	0	0	0	0	0	0.182236	0	0	0	0	0	0	0	0	0	0	0	0	0
NR_024452.1	0.723459	2.40502	0.594301	1.38428	0.31272	0.838857	1.0038	1.25513	1.11009	0.907626	0.830562	0.978444	1.51219	1.55633	0.372875	0.318418	1.32097	2.6781	0.70541	0.679355
NR_110930.1	0.0844796	0.230073	0.190399	0.241828	0.135883	0.0729514	0.203893	0.0874016	0.202765	0.507148	0.404843	0.17109	0.605468	0.80587	0.442416	0.233957	0.15455	0.501405	0.205493	0.0455542
NR_110931.1	0	0.00975114	0	0	0	0	0	0	0	0.11672	0	0	0	0	0	0	0	0	0	0
NR_110932.1	0	0.0221203	0	0	0	0	0	0	0	0	0	0	0	0	0	0	0	0	0.0941373	0
NR_015445.1	0.320265	0.776815	0.681674	1.36363	0.380654	0.50996	0.916367	0.456714	0.6123	0.955744	1.01031	0.781927	1.3262	1.19104	0.4065	0.537747	0.493903	2.83761	1.05046	0.893305
NR_024476.1	0.63821	1.60947	1.56316	1.77598	0.588503	0.9236	0.511575	0.969548	1.60513	0.801366	1.11278	1.49054	2.10761	1.04175	1.36047	1.49022	0.481969	1.26053	1.82498	0.57252
NR_110939.1	0	0	0	0	0	0	0	0	0	0	0	0	0	0	0	0	0	0	0	0
NR_110943.1	0.17861	0	0	0.256316	0	0.6213	0	0.185923	0.216365	0.240083	0.279616	0	0	0.261976	0.230142	0.19653	0	0.354202	0	0.38705
NR_040034.1	0.0178465	0	0	0.0503976	0	0	0.143092	0	0	0.0717094	0.0282318	0	0	0.0516778	0	0	0	0	0.0413748	0
NR_111907.1	0.220606	0.651616	0.251741	0.540039	0.27719	0.220249	0.945888	0.266014	0.258417	0.90589	0.654132	0.180042	0.570918	0.753724	0.466712	0.291587	0.333345	1.12033	0.409372	0.325284
NR_111911.1	0	0	0	0	0	0	0	0	0	0	0	0	0	0	0	0	0	0	0	0
NR_024563.1	0	0.0132452	0.0136871	0	0	0	0.039123	0	0.0296028	0	0.0765135	0.0123938	0	0.0179216	0.0157438	0	0	0	0.0595688	0
NR_024569.1	1.54471	2.19202	1.91906	1.64355	2.40475	1.74254	1.93861	2.00686	2.13395	2.01753	1.86127	1.6528	1.54507	1.98264	1.79361	1.4731	2.18245	2.54813	1.71793	2.23672
NR_037597.1	0.0289925	0.0785712	0.0487155	0.0215011	0	0.0126064	0.0464158	0.0150897	0.070242	0.0194855	0.0680821	0.0309584	0.0619779	0	0.093393	0.0725573	0.0132344	0.0574951	0.0471152	0.0629231
NR_024623.1	0.0986665	0.109679	0.0544939	0.291698	0.0791593	0.175595	0.16533	0.101188	0	0.35359	0.402589	0.103943	0.0700655	0.0739144	0	0.107186	0.177853	0.403897	0.0868206	0
NR_003676.3	0	0	0	0	0	0.0323539	0	0.0193637	0	0	0	0	0.0265107	0	0	0.0204684	0	0	0	0
NR_026542.1	0	0	0	0	0	0	0	0	0	0	0	0.0380924	0	0	0.0483887	0	0	0	0.122057	0
NR_026547.1	0	0	0	0	0	0	0	0	0.142697	0	0	0	0	0	0	0	0	0.116801	0	0
NR_026548.1	0.065384	0.0708777	0.0732424	0.0938301	0	0	0	0	0	0.0878876	0.10236	0	0.279546	0	0	0	0.119385	0.129663	0	0.212532
NR_111954.1	0.412958	0.516697	0.393264	0.354703	0.254896	0.770773	0.475342	0.366652	0.450733	0.386109	0.65664	0	0.548848	0	0.886387	0	0	0	0.924521	0.41785
NR_111955.1	0	0	0	0	0	0	0	0	0	0	0	0	0	0	0	0	0	0	0	0
NR_111956.1	0	0	0	0	0	0	0	0	0	0	0	0	0	0	0	0	0	0	0	0
NR_111957.1	2.48615	2.68837	2.61763	2.50513	3.11455	2.44554	2.65532	3.4736	2.40267	2.01596	2.88498	1.82191	4.53353	2.78017	2.83716	2.09825	3.3004	2.62897	2.14109	3.58344
NR_111958.1	0.0393232	0	0	0	0	0	0	0	0	0.282582	0	0.759939	0	0.208756	0	0.460262	1.26717	0.855378	0	1.58702e-08
NR_046245.1	0	0	0	0	0	0	0	0	0	0	0	0	0	0	0	0	0	0	0	0
NR_105013.1	0	0	0	0	0	0	0	0	0	0	0	0	0	0	0	0	0	0	0	0
NR_028348.1	0	0	5.79255e-06	0	0	0	0	0	1.53691e-07	0	0	0	0	2.04593e-06	4.45928e-07	0	0	0	0	0
NR_028349.1	0	0	0.837492	0	0	0	0	8.57501e-07	0.00613922	0	0	0	0	0.150307	0.0544339	0	0	0	0	0
NR_027145.2	0.0243145	0.059122	0	0	0	0	0.0289828	0.0246022	0.0553318	0.0243517	0.0878334	0	0	0.0312412	0	0	0	0	0.0975276	0
NR_026950.1	0.39589	1.08792	0.389618	1.36484	0.218427	0.505529	1.04063	0.348026	0.0853053	0.500597	1.50351	0.504354	0.867195	1.34901	1.21554	0.0937817	0.266325	1.78706	0.9708	0.422469
NR_027060.1	0	0	0.0288336	0	0	0	0	0	0	0	0.0402962	0	0.0366833	0	0	0	0	0	0.0418296	0
NR_038967.1	15.6832	21.1909	18.0505	15.601	17.6901	12.6113	14.4506	14.752	6.81574	7.80101	19.6249	19.8576	22.1241	16.2461	10.5098	6.69696	16.6518	16.7968	9.67284	10.7614
NR_027071.1	0	0	0	0	0	0	0	0	0	0	0	0	0	0	0	0	0	0	0	0
NR_027090.1	0	0	0	0	0	0	0	0	0	0	0	0	0	0	0	0	0	0	0	0
NR_027129.1	0.202521	0.434161	1.17449	1.30595	0.442159	0.682437	1.12952	0.264371	0.660002	0.914097	1.20922	1.20887	0.658625	0.9108	1.37387	0.767811	0.129442	1.35956	0.388009	0.476963
NR_109916.1	0	0	0	0	0	0	0	0	0	0	0	0	0	0	0	0	0	0	0	0
NR_109917.1	0	0	0	0	0	0	0	0	0	0	0	0	0	0	0	0	0	0	0	0
NR_120325.1	0	0	0	0	0	0	0	0	0	0	0.149534	0	0.136127	0.1401	0	0	0	0	0	0
NR_120335.1	0.117891	0	0.131954	0.507135	0.381887	0.102439	0.75435	0	0	0.475624	0	0.119486	0.335999	0	0.153249	0.389418	0.107618	0.24275	0	0
NR_120339.1	0.0700767	0.113779	0.152381	0.0525449	0.118703	0	0.179957	0.219237	0.201613	0.0984342	0.176795	0.0907045	0.22618	0.102785	0.0962584	0.144936	0.0307843	0.264042	0.0595026	0.15869
NR_120346.1	0	0	0.0289716	0.0436014	0	0	0	0.0369832	0	0	0	0	0	0.0351105	0	0	0	0.0651994	0	0
NR_120353.1	0	0	0	0	0	0	0	0	0	0	0	0	0	0	0	0	0	0	0	0
NR_120362.1	0	0	0	0	0	0	0	0	0	0	0	0	0	0	0	0	0	0	0	0
NR_120367.1	0	0	0	0.0277893	0.0313891	0	0.0310018	0.0201573	0	0.0520586	0.0312228	0	0	0	0.02554	0	0.0176789	0	0	0
NR_120378.1	1.04955	6.58642	1.39845	4.79227	0.115338	1.70371	3.34346	1.14559	0.864499	3.67293	7.81188	1.66719	6.59875	2.36398	4.10463	1.9426	0.947421	5.42824	3.61127	2.24202
NR_120379.1	0.518633	2.74566	0.731942	2.97523	0.142712	0.532667	2.69451	0.511547	0.376593	0.409879	1.75798	0.422983	1.92833	2.45507	0.569008	0.684926	0.215288	3.06773	1.9166	0.345324
NR_024442.2	0	0	0	0.202754	0	0	0.307983	0	0	0.0872432	0.526379	0	0.164376	0.136238	0	0.169768	0	0.315589	0	0
NR_120395.1	0	0	0	0	0	0	0	0	0	0	0	0	0	0	0	0	0	0	0	0
NR_120398.1	0.023297	0.138899	0	0.167163	0	0.0303897	0.167839	0.0485016	0.0705539	0.140918	0.164123	0	0.132807	0.170854	0.0300185	0	0.0638072	0.0693005	0.0378596	0.0126212
NR_120420.1	0	0	0	0	0	0	0	0	0	0	0	0	0	0	0	0	0	0	0	0
NR_104616.1	0	0	0	0	0	0	0	0	0	0	0	0	0	0	0	0	0	0	0	0
NR_109909.1	4.58764	15.2393	6.38316	10.301	5.18703	6.79644	11.0786	5.92732	5.56312	11.6679	12.1638	6.4574	10.5842	11.2669	9.81839	5.39509	7.55943	14.5898	11.4513	6.43037
NR_120423.1	0.0963377	0.432229	0.315188	0.278393	0.424326	0.264668	0.770197	0.347962	0.264196	0.565904	0.908699	0.279137	0.407348	0.618568	0.407321	0.18698	0.304759	0.787666	0.606534	0.633276
NR_026897.1	0	0	0	0	0	0	0	0	0	0	0.0334886	0	0	0	0	0.0470754	0	0	0	0
NR_104658.1	0	0	0	0	0	0	0	0	0	0	0	0	0	0	0	0	0	0	0	0
NR_104659.1	0	0.170107	0	0	0	0	0	0	0	0	0	0.318344	0	0.230165	0	0	0.143262	0	0	0
NR_104673.1	0	0	0	0	0	0	0	0	0	0	0	0	0	0	0	0	0	0	0	0
NR_105024.1	0	0.811872	0	0.716521	0.40467	0	0.799354	0.519738	0.604839	0.335571	0.390827	0	1.42314	0	0.321675	0	0.227917	0	0	0
NR_108030.1	0	0	0	0	0	0	0	0	0	0	0	0	0	0	0	0	0	0	0	0
NR_120434.1	0	0	0	0	0	0	0	0	0	0	0	0	0	0	0	0	0	0	0	0
NR_027084.1	0.0753439	0.0952869	0.0984659	0.0720821	0.0203549	0.0327607	0.0402076	0.0784286	0.0304235	0.0168792	0.058976	0.0764243	0.0894803	0.0920921	0.0161803	0.0414516	0.0573213	0.0249025	0.0204067	0.0272118
NR_120444.1	0	0	0	0	0	0	0	0	0	0	0	0	0	0	0	0	0	0	0	0
NR_046768.1	0	0	0	0	0	0	0	0	0	0	0	0	0	0	0	0	0	0	0	0
NR_120504.1	0.0224288	0	0	0.0321867	0	0	0	0.140083	0	0	0.0702252	0.0227504	0.0319644	0	0	0.0246791	0	0.0444787	0	0.0486035
NR_120517.1	1.98618	1.32305	1.53809	0.218937	0.989193	1.32673	1.22123	1.90571	2.59094	0.820285	1.19419	2.16651	1.7394	1.11886	2.16237	1.34296	0.697414	0.302548	1.48757	1.48772
NR_120523.1	0	0	0	0	0	0	0	0	0	0	0	0	0	0	0	0	0	0	0	0
NR_109911.1	0.117053	0.127279	0.0984454	0.210158	0	0.193911	0.0545757	0	0.169071	0.118327	0.137742	0.0300477	0	0.0875103	0.0755494	0	0.0535452	0.133142	0.190672	0
NR_120551.1	0	0.032421	0	0.0430553	0.0969052	0.0259799	0.0480601	0	0.0361835	0.0812548	0	0	0	0.0441538	0	0.0329245	0.0550291	0	0	0.0324437
NR_120552.1	0	0	0	0	0	0	0	0	0	0	0	0	0	0	0	0	0	0	0	0
NR_120554.1	0	0	0	0	0	0	0	0	0	0	0	0	0	0	0	0	0	0	0	0
NR_120555.1	0	0	0	0	0	0	0	0	0	0	0	0	0	0	0	0	0	0	0	0
NR_120568.1	0	0	0	0	0	0	0	0	0	0	0	0	0	0	0	0	0	0	0	0
NR_120569.1	0	0	0	0	0	0.31065	0	0	0	0	0	0	0	0	0	0	0	0	0	0
NR_120624.1	0	0.0666152	0	0	0.099611	0.0534405	0.098382	0	0	0	0	0	0	0	0.0791816	0	0	0.121865	0	0
NR_120625.1	0	0	0	0	0	0	0	0	0	0	0	0	0	0	0	0	0	0	0	0
NR_120634.1	0.236962	0.421806	0.22322	0.354594	0.342423	0.156455	1.09765	0.185946	0.134248	0.999496	0.496289	0.193744	0.654432	0.478616	0.270032	0.157554	0.148577	0.743198	0.609317	0.132291
NR_120635.1	0	0	0	0	0	0	0	0	0	0	0	0	0	0	0	0	0	0	0	0
NR_110056.1	1.76635	0.957384	1.23666	1.26741	0.715798	1.72809	0.353483	0.689502	1.06987	1.18715	0.691313	0.895842	0	0.647699	0	1.21473	1.41103	0.437858	0	0.956927
NR_120660.1	0.0905837	0.106978	0.144347	0.208936	0.0171817	0.140339	0.402631	0.144152	0.0774101	0.251496	0.289913	0.122638	0.225313	0.215908	0.223956	0.112928	0.12741	0.109708	0.185888	0.0356191
NR_120662.1	0.0685461	0.445833	0.0767846	0.196736	0	0	0.329219	0.0713525	0	0.368552	0.32193	0.208587	0.488442	0.10054	0.353291	0	0.125159	0.815605	0.66836	0.0742701
NR_120669.1	0	0	0	0	0	0	0	0	0	0	0	0	0	0	0	0	0	0	0	0
NR_120670.1	0	0	0	0	0	0	0	0	0	0	0	0	0	0	0	0	0	0	0	0
NR_121185.1	0	0.194862	0	0	0	0	0	0	0	0	0	0	0	0	0	0	0	0	0	0
NR_121186.1	0.121724	0.967123	0	1.20573	0.298909	0.122941	1.14922	0.092585	0	0.667682	1.37627	0.725699	0.763276	1.13655	1.08873	0.206965	0.181805	2.3397	0.847935	0.192741
NR_121187.1	0.151899	0	0	0	0	0	0	0	0	0	0	0	0	0	0	0	0	0	0	0
NR_121565.1	0.155761	0.282614	0.0860066	0.199674	0.192606	0.0509579	0.384394	0.140474	0	0.162049	0.245718	0.0959979	0.245171	0.318115	0.246593	0.077754	0.32319	0.663678	0.257416	0.167688
NR_036573.1	0.601483	3.18689	0.899168	2.48963	0.928369	1.13245	2.45866	1.08454	1.08514	2.06623	2.18208	0.60979	2.9676	3.48788	2.38048	0.784416	0.737409	3.52394	3.24671	0.47233
NR_121602.1	0.00968225	0.0419831	0.0433838	0.0138946	0.0156946	0.00841999	0.0310018	0.0201573	0.0234579	0.039044	0	0.00982109	0.041396	0.0142014	0.0249514	0.0213074	0.0353578	0.0576028	0.031469	0.0209815
NR_121606.1	0	0	0.303407	0	0	0	0	0	0	0	0	0	0	0	0	0	0	0	0	0
NR_110214.1	0	0	0	0	0	0	0	0	0	0	0	0	0	0	0	0	0	0	0	0
NR_028335.1	0.317242	0.859744	0.533057	0.682893	0	0.827652	0	0.165115	0.192151	1.06607	0.993294	0.321791	0.678177	0.232657	0.204386	0	0.144814	0.314562	0.773319	0.515601
NR_121624.1	0	0	0	0	0	0	0	0	0	0	0	0	0.226059	0	0	0	0	0	0	0
NR_121626.1	0	0	0	0	0	0.254733	0	0	0	0	0.458571	0	0.417455	0	0	0	0	0	0	0
NR_121651.1	0	0	0	0	0	0	0	0	0	0	0	0	0	0	0	0	0	0	0	0
NR_121657.1	0.217515	0.235791	0.852803	0.156074	0.705167	0.283737	0.348233	0.339631	0.131747	0.292379	0.340523	0.110317	0	0.31904	0.140136	0.239339	0.397163	0.431355	0	0.471358
NR_121660.1	0	0	0	0	0	0	0	0	0	0	0	0	0	0	0	0	0	0	0	0
NR_121667.1	0	0	0	0	0	0	0	0	0	0	0	0	0	0	0	0	0	0	0	0
NR_121668.1	0	0	0	0	0	0	0	0	0	0	0	0	0	0	0	0	0	0	0	0
NR_121677.1	0.125799	0.426892	0.169562	0.103937	0.0836794	0.0920777	0.180236	0.0750057	0.175809	0.157519	0.115473	0.0725442	0.0531544	0.330187	0.347852	0.038935	0.16097	0.457792	0.175935	0.0776297
NR_122043.1	0	0	0.0284174	0	0	0	0	0	0	0	0	0	0	0	0	0	0	0	0	0
NR_026874.2	0.728054	0.710304	0.407779	0.731362	0.472059	0	1.28214	0.49261	0.74966	0.984342	1.14643	0.738494	1.5045	1.0741	1.88716	0.921266	0.398808	1.15505	2.37987	0.828293
NR_122045.1	0	0	0	0	0	0.56632	0	0	0	0.611888	0.292854	0	0	0.274378	0.482074	0	0	2.15381e-08	0.234728	0
NR_122122.1	0	0	0	0	0	0	0	0	0	0	0	0	0	0	0	0	0	0	0	0
NR_122123.1	0.0544915	0.107752	0.124847	0	0.263938	0.0473224	0.262849	0.226904	0	0.220085	0.25659	0.110317	0.388725	0.69623	0.273131	0.0713036	0.0497016	0.440864	0.180354	0.117965
NR_110225.1	0	0	0	0	0	0	0	1.27556e-08	0	0	0	0	0	0	0	0	0	0	0	0
NR_110272.1	0	0.166383	0.205784	0.158715	0.108588	0.236105	0.118438	0.10593	0.45448	0.254595	0.164378	0.0517329	0.448153	0.0753135	0.131356	0.169898	0.102167	0.303268	0.0824059	0.110843
NR_110479.1	0.00642215	1.0701	0.50302	0.982631	5.24034e-07	1.1791e-07	2.16812	0.504168	0.000199692	2.87267	0.895136	0.112062	1.1822	0.576346	2.29005e-06	0.432082	0.305509	1.14395	0.220642	0.606905
NR_027033.2	0.561026	0	0.651906	0.417575	1.46149	0.982333	0.383458	0.302894	0.315885	0.782258	0.905695	1.47316	0.307001	1.28039	1.21766	0	0.56838	1.15409	0.945726	0.315279
NR_110497.1	0	0	0	0	0	0	0	0	0	0	0	0	0	0	0	0	0	0	0	0
NR_110504.1	0	0	0	0	0	0	0	0	0	0	0	0	0	0	0	0	0	0	0	0
NR_110514.1	2.92026	3.34943	3.50207	4.00114	3.03245	3.01993	7.70281	4.56783	3.37493	11.0502	4.32824	2.05245	2.57411	4.63155	3.02503	2.8808	6.08392	5.73328	3.56431	3.78291
NR_109770.1	0.300473	0.491054	0.191336	0.744163	0.277725	0.385077	0.726224	0.399184	0.408335	1.05928	0.179677	0.400668	0.399321	0.996881	0.534463	0.122071	0.407675	0.331139	0.185725	0.551601
NR_110278.1	0	0.124191	0	0	0	0.0980246	0	0	0	0	0	0	0	0.266498	0	0	0	0	0	0
NR_125344.1	0.0450339	0.14681	0.0341833	0.0432413	0.0278903	0.0653119	0.123555	0.0940259	0.0183103	0.0844716	0.141432	0.0609509	0.172392	0.189042	0.154862	0.0330878	0.0781883	0.246319	0.122199	0.0488314
NR_038846.1	0	0	0	0	0	0	0	0	0	0	0	0	0	0	0	0	0	0	0	0
NR_033389.1	0.116295	0.730103	0.0660122	0.206616	0	0	0.296317	0.0923698	0.181949	0.161289	0.313772	0.087035	0.33589	0.309426	0.820438	0.163411	0.0547314	0.645225	0.48786	0.0319464
NR_125362.1	0.0693791	0.0694199	0	0.122277	0.0521005	0.174866	0.236578	0.07641	0.0478375	0.381577	0.193864	0.111767	0.145989	0.392509	0.318679	0.0570018	0.239672	0.3338	0.0525311	0.117034
NR_125374.1	0.266839	1.41376	0.32002	1.01282	0.63161	0.295861	1.27333	0.173574	0.319249	1.32041	1.08558	0.383036	1.38938	2.06913	1.10714	0.0821514	0.286319	1.15681	0.341015	0.352938
NR_125387.1	0	0	0	0	0	0	0	0	0	0	0	0	0	0	0	0	0	0	0	0
NR_125395.1	0	0.347663	0.179631	0.253738	0	0	0.627166	0.166923	0.107094	0.341963	0.415205	0	0	0.470409	0.206623	0	0.146399	0.876597	0.431005	0
NR_110283.1	0	0.157715	0.325953	0.208788	0	0.253046	0.232924	0.454341	0	0.195565	0.227767	0	0.207345	0.426795	0	0	0	0	0	0.315279
NR_125426.1	0	0.160337	0	0	0	0	0	0	0	0	0.2244	0	0	0	0	0	0.125454	0	0.233211	0
NR_125429.1	0.133411	0.247336	0.279085	0.277932	0.260675	0.268439	0.57326	0.320526	0.19174	0.528946	0.363407	0.268206	0.352716	0.388447	0.205935	0.0796619	0.146584	0.400737	0.445317	0.244372
NR_125430.1	0.289066	0	0	0.136896	0	0	0	0.300901	0.35017	0	0.758487	0	0	0.0355399	0.372466	0.238407	0	0.172511	1.28863	0.870992
NR_125432.1	0	0	0	0	0	0	0	0	0	0	0	0	0	0	0	0	0	0	0	0
NR_125431.1	0	0	0	0.308257	0	0.106699	0.19923	0.226845	0	0.148683	0	0	0.153075	0	0	0	0	0	0	0
NR_125821.1	0.107807	0.260975	0.0279554	0.159666	0.138399	0.113462	0.362864	0.159235	0.0612928	0.340176	0.329832	0.206722	0.265647	0.555999	0.0970086	0.10883	0.147344	0.581529	0.2839	0.0562446
NR_125826.1	0	0	0	0	0	0	0	0	0	0	0	0	0	0	0	0	0	0	0	0
NR_125838.1	0.0909876	0.1487	0.047215	0.0989909	0.0203586	0.0772403	0.201335	0.0840692	0.0649594	0.288355	0.161742	0.0361933	0.209349	0.284144	0.0924065	0.117718	0.0294088	0.305083	0.0822671	0.0220245
NR_125839.1	0.216444	0	0	0	0	0	0	0	0	0	0	0	0	0	0	0	0	0	0	0.234518
NR_125842.1	0.0373514	0.193671	0.0343681	0.0771079	0.07542	0.0267774	0.12772	0.0319794	0.0185684	0.100906	0.168322	0.0699839	0.187414	0.189926	0.128989	0.0177283	0.0474893	0.0304998	0.0250331	0.0195709
NR_125843.1	0.370018	2.82496	0.373048	1.91319	0.645664	0.685664	0.598482	0.627928	0	0.661001	1.85838	0.294038	0.902199	1.02949	0.979416	0.2503	0.850534	1.29398	0.811491	0.629091
NR_125847.1	0.35722	0	0	0	0	0	0	0	0.216365	0.240083	0	0	0	0	0	0	0	0	0	0
NR_125851.1	0	0	0	0.0830749	0	0.0503425	0	0	0	0	0	0	0	0	0	0	0	0	0	0
NR_125852.1	0.101829	0.431764	0	0.0701481	0.254936	0.0936466	0.171523	0.0560758	0.118034	0.265607	0.314525	0.312028	0.242649	0.228217	0.196957	0.110459	0.0889471	0.197652	0.178983	0.113723
NR_125853.1	0	0	0	0	0	0	0	0	0	0	0	0	0	0	0	0	0	0	0	0
NR_125858.1	0.0948986	0.102872	0	0	0	0.0825268	0.303858	0	0.114959	0.12756	0.445695	0.0962594	0	0.139192	0	0	0	0.188194	0.462655	0
NR_125859.1	0	0	0	0	0	0	0	0	0	0	0	0	0	0	0	0	0	0	0	0
NR_125864.1	1.27555	3.60894	2.6403	1.58768	1.80784	2.27977	1.39281	0.988187	2.73718	2.12698	3.18337	2.66247	3.04072	4.20721	1.26421	1.03335	2.39845	4.3535	1.35226	1.29582
NR_125867.1	1.74975	0.632255	0.871131	0.557998	0.315141	0.338141	0.311253	0.404752	0.706538	1.04532	0.304361	1.18322	1.66243	0.570319	0	2.78099	0.354986	0.771095	0	0.842604
NR_125874.1	0	0	0	0	0	0.0756632	0	0	0.105398	0	0.136209	0	0	0	0	0	0	0	0	0
NR_125878.1	0	0	0	0	0	0	0	0	0	0	0	0	0	0	0	0	0	0	0	0
NR_125879.1	0.299714	1.05508	0.278762	0.654292	0.260504	0.812226	0.540057	0.255566	0.321556	0.872853	0.654143	0.521646	1.14518	0.877805	0.907434	0.17873	0.629925	0.828631	0.805997	0.417912
NR_125881.1	0	0	0	0	0.698376	0	0	0.20147	0	0	0	0.234976	0	0	0.240623	0	0.180565	0	0	0
NR_125882.1	0.789011	0.988947	0.552401	0.636907	0.639478	0.450285	0.592114	0.410657	0.955796	0.397714	0.579004	0.200081	0.773066	0.50631	0.571867	0.461217	0.315145	0.831242	0.480829	0.400733
NR_125893.1	0	0	0	0	0	0	0	0	0	0	0.185907	0	0	0	0	0	0	0	0	0.128668
NR_125892.1	0	0.114111	0.0235836	0	0.0341264	0.0366171	0	0.0657455	0.0765106	0.0282992	0.197755	0.106776	0.090012	0.0926393	0.0813821	0.046331	0	0.0835015	0.0342133	0.0684338
NR_125900.1	0.150995	0.322552	0.138217	0.267946	0.151417	0.323675	0.248402	0.0644498	0.213749	0.516712	0.147798	0.125384	0.355156	0.306924	0.686441	0.366579	0.194217	0.829874	0.252596	0.196383
NR_125905.1	0	0	0	0	0	0	5.43318e-10	0	0	0.527344	0.175874	0	1.52306e-06	0	0	0	0	0.214296	0	0
NR_027107.2	0.956511	2.58744	1.09113	1.90156	1.36555	1.20575	2.009	1.72644	2.07291	1.05843	2.84637	1.26396	2.31364	1.99504	1.79783	0.965577	1.73849	3.17575	2.23892	1.62589
NR_033998.1	0	0	0	0	0	0	0	0	0	0.0901687	0	0	0	0	0	0	0	0	0	0.145365
NR_125923.1	0.441589	0	0.247331	0.633707	0	0	1.41393	0	0	0	0.345656	0	0.62933	0	0	0	0	0.437858	0	0
NR_046668.1	0	0.992288	0.341798	1.31362	0.494596	0	0.488494	0.317618	0	0	0.477678	0.309501	1.30455	0.447542	0	0	0.835697	0	0.495855	0
NR_125943.1	0	0	0	0	0	0	0	0	0	0	0	0	0	0	0	0	0	0	0	0
NR_125947.1	3.3024	6.59221	3.56397	7.62888	2.67653	3.71242	4.19093	3.89875	4.14684	4.00594	5.4852	4.37103	6.65786	6.37963	5.6044	3.58942	3.63999	7.2678	4.12319	3.83999
NR_125953.1	0	0.504019	0.390626	0	0	0.101084	0.186093	0.241995	0	0.156245	0	0.353715	0.496971	0.170492	0	0	0	0.691538	0	0
NR_034091.1	0.073572	0.321247	0.0415976	0.161036	0.121682	0.0964563	0.117705	0.310844	0.135981	0	0.461304	0.11371	0.266432	0.163594	0.0470732	0	0.067588	0.22384	0.0609373	0.0404825
NR_125958.1	0.251075	0.408256	0.140625	0.360308	0.203491	0	0	0	0.912444	0.674977	0.786121	0.127337	0.715638	0.368263	0.323513	0	0.11461	0.497907	0.816036	0.272041
NR_046323.1	0	0	0	0	0	0	0	0	0	0	0	0	0	0	0	0	0	0	0	0
NR_034099.1	0.0578894	0.0627534	0.064847	0	0	0	0	0	0	0	0.0906267	0	0.0825011	0.0849092	0	0	0	0	0	0.0627235
NR_105040.1	0	0	0	0	0	0	0	0	0	0	0	0	0	0	0	0	0	0	0	0
NR_125965.1	0	1.15007	0	0	0	0	0.418709	0	0	0	0.420003	0	0	0	0	0	0	0	0	0
NR_125975.1	0.295498	0.109564	0.264212	0	0.188473	0.327252	0.149287	0.271587	0.12638	0.1676	0	0.202257	0.0705398	0.201345	0.262596	0.293787	0.155472	0.276344	0.129433	0.270942
NR_125976.1	0.512746	0.775342	0.889347	0.430984	0	0.343566	0.498544	0.361592	0.573168	0.869601	0.896594	0.531189	0.491412	0.737493	0.467518	0.0793375	0.245327	0.76712	0.295329	0.281592
NR_125979.1	0	0	0	0.274056	0	0	0.277372	0	0	0	0.275995	0.176058	0.255246	0.53842	0	0	0	0.354963	0	0
NR_125982.1	0	0	0	0	0	0	0	0	0	0.223714	0	0	0	0.244114	0	0	0	0	0	0
NR_125984.1	0	0	0	0	0	0	0	0	0	1.01828	0	0	0	0	0	0.41678	1.03742	1.50231	0	0
NR_125987.1	0	0	0	0	0	0	0	0.76107	0	0	0	0	0	0	0.94208	0.804492	0	1.44992	0	0
NR_125993.1	0	0	0	0	0	0	0	0	0	0	0	0	0	0	0	0	0	0	0	0
NR_126003.1	0	0	0	0	0	0	0	0	0	0	0	0	0	0	0	0	0	0	0	0
NR_126004.1	0.05474	0.27418	0.0406306	0.108085	0.23565	0.0949641	0.137474	0.0188495	0.0949802	0.294733	0.0930657	0.127481	0.214785	0.0903539	0.162188	0.141554	0.132967	0.381349	0.179075	0.0838435
NR_126007.1	0	0	0	0	0	0	0	0	0	0	0	0	0	0	0	0	0	0	0	0
NR_126022.1	0	0	0	0.00309061	0	0	0.0754998	0	0	0.224552	0.650946	0	0	0.130878	0	0.0154756	0	0	0	0
NR_126023.1	0	0.245558	0.293167	0	0.273033	0	0	0.286261	0	0	0	0	0.164714	0	0	0.196084	0.119859	0	0.18082	0
NR_126025.1	0	0	0	0	0	0	0	0	0	0	0	0	0	0	0	0	0	0	0	0
NR_126047.1	0.158044	1.10258	0.214577	0.821215	0.24156	0.47182	0.796565	0.34029	0.288554	0.560286	0.583384	0.276695	1.19394	1.04456	0.399735	0.500427	0.700095	0.872369	0.238639	0.442098
NR_126050.1	0	0	0	0	0	0	0	0	0.0537218	0	0	0	0	0	0.108021	0	0	0	0	0
NR_126054.1	0	0	0	0	0	0	0	0	0	0	0	0	0	0	0	0	0	0	0	0
NR_126062.1	0	0	0	0	0	0	0	0	0	0	0	0	0	0	0	0	0	0	0	0
NR_038862.1	0.0318978	0.108835	0.0663637	0.154308	0.120892	0.157638	0.0943416	0.0646687	0.126679	0.122979	0.313274	0	0.0831283	0.143826	0.0320096	0.0822448	0.110415	0.358558	0.0819401	0.0293492
NR_026578.1	0	0.24978	0.377549	0	0.876408	0.526132	0	0	0.480999	0.35359	0	0.324448	1.58207	0.971928	0.7813	0	0	0	0	0.355217
NR_126345.1	0.295588	0.931141	0.168854	0.74248	0.265293	0.788883	2.88718	0.423979	0	2.39444	1.3654	0	1.1419	1.82163	1.25235	0.297338	0.732938	2.22736	1.40056	0.735811
NR_126346.1	0.0911578	0	0	0	0	0	0	0	0	0	0.142709	0	0	0	0	0.100304	0	0	0	0
NR_126348.1	0.323074	0.17511	0.361904	0	0.52369	0	0.258614	0	0.391367	0	0.252888	0.327707	0	0.473868	0.208143	0.177744	0.294952	0	0	0.175026
NR_126349.1	0	0	0	0	0	0	0	0	0	0	0	0	0	0	0	0	0	0	0	0
NR_126352.1	0	0	0	0	0	0	0	0	0	0	0	0	0	0	0	0	0	0	0	0
NR_126353.1	0	0	0	0	0	0	0	0	0	0	0	0.188848	0	0	0	0	0	0	0	0
NR_126358.1	0	0	0	1.06871	0	0.323813	0.596128	1.55041	0.451067	1.50154	0.582929	0	0.530664	0.546153	0.959573	0.409715	0.339944	0	0	0
NR_126361.1	0	0	0	0	0	0	0.558279	0.362992	0	0	0	0	0	0	0	0	0	0	0.566692	0
NR_126363.1	0	0	0	0	0	0	0	0.166316	0	0	0	0.162066	0	0.234349	0	0	0	0	0	0
NR_126369.1	0	0	0	0	0	0	0	0	0	0	0	0	0	0	0	0	0	0	0	0
NR_126370.1	0	0.197634	0	0.261634	0	0	0.29188	0	0	0	0.285418	0	0	0	0	0	0	0.361551	0	0
NR_126374.1	0	0	0	0	0	0	0	0	0	0	0	0	0	0	0	0	0	0	0	0
NR_126375.1	0	0	0	0	0	0	0	0	0	0	0	0	0	0	0	0	0	0	0	0
NR_036551.1	0.100376	0.314426	0.102078	0.703938	0.182658	0.137492	0.429647	0.22799	0.260111	0.552433	0.89904	0.25984	0.378604	0.350123	0.491212	0.22863	0.225563	0.620645	0.557817	0.236248
NR_126380.1	0	0	0	0	0	0	0	0	0	0	0	0	0	0	0	0	0	0	0	0
NR_126382.1	0	0	0	0	0	0	0.251225	0	0	0.21093	0	0.159172	0	0.230165	0	0.172666	0	0	0	0.680102
NR_126383.1	0	0	0	0	0	0	0	0	0	0	0	0	0	0	0	0	0	0	0	0
NR_126385.1	0	0.517714	0	0	0	0.830649	0	0	0	0	0	0	0	0	0	0	0	0	0	0
NR_126397.1	0	0	0	0	0	0	0	0	0	0	0	0	0	0	0	0	0	0	0	0
NR_126401.1	0	0	0	0	0	0	0	0	0	0	0	0	0	0	0	0	0	0	0	0
NR_126410.1	0	0	0	0	0	0	0	0	0	0	0	0	0	0	0	0	0	0	0	0
NR_027093.1	0	0	0	0	0	0	0	0	0	0	0	0	0	0	0	0	0	0	0	0
NR_126411.1	0.238262	0.721692	0.140349	0.410296	0.196339	0.0736964	0.409846	0.24398	0.177044	0.516164	0.168563	0.212319	0.355032	0.465513	0.599144	0.149893	0.199342	0.445193	0.320402	0.189795
NR_126413.1	0	0	0	0	0	0	0	0	0	0	0	0	0	0	0	0	0	0	0	0
NR_126412.1	0	0	0	0	0	0	0	0	0	0	0	0	0	0	0	0	0	0	0	0
NR_126422.1	0	0	0	0	0	0	0	0	0	0	0.279616	0	0	0	0	0	0	0	0	0
NR_126424.1	0.305666	0.310284	0	0.444356	0	0.264952	0.450917	0.664781	0.682383	0	0.440934	0	0.934675	1.33696	0.790403	0	0.26652	1.4329	0.861352	0.325941
NR_105044.1	0.108222	0	0	0.156564	0	0	0.34942	0	0	0.292182	0.340299	0.109774	0.154969	0	0	0	0	0	0	0.234518
NR_109774.1	0	0	0	0	0	0	0	0	0	0	0	0	0	0	0	0	0	0	0	0
NR_024236.1	0.0639355	0.196968	0.10809	0.145062	0.0758415	0.0965797	0.202448	0.171329	0.0676743	0.279659	0.285676	0.0987179	0.193858	0.404011	0.142139	0.0826876	0.143363	0.29494	0.106936	0.0697701
NR_036475.2	0.620184	0.709597	0.464084	0.275536	0.324388	0.890755	0.149571	0.204094	0.119357	0.247241	0.27135	0.717281	0.390445	0.412745	0.263703	0.470662	0.263581	0.163515	0.163633	0.314935
NR_126435.1	5.44666	18.4608	8.74441	17.3731	5.78465	9.10719	22.0587	10.6274	11.1745	18.6817	28.4205	9.77678	20.5939	16.4206	19.0393	8.55687	9.94942	27.8604	26.9891	8.27847
NR_126447.1	1.1259	1.75951	0.754266	3.71864	0.541611	1.82678	1.72041	1.68624	0.997354	1.85034	1.08705	1.75046	1.02148	2.22979	2.30478	1.47061	0.510833	2.58528	4.17849	0.827109
NR_126518.1	0	0	0	0	0	0	0	0	0	0	0	0	0	0	0	0	0	0	0	0
NR_126519.1	0	0	0	0	0	0	0	0	0	0	0	0	0	0	0	0	0	0	0	0
NR_003142.2	27.3396	21.4611	15.8408	16.2347	32.0912	21.3158	40.751	40.235	15.9884	44.3525	23.6141	17.2127	33.5888	37.3347	19.4358	16.5973	46.4768	35.5216	27.5767	36.7729
NR_126561.1	0.67289	1.02845	0.898145	0.801665	0.838489	0.922675	0.498871	0.862143	0.639926	0.450473	0.831166	0.481379	0.530774	0.638437	0.489476	0.47452	1.01037	0.587962	0.499623	0.813894
NR_038976.1	0	0	0	0	0	0	0	0	0	0	0	0	0	0	0	0	0	0	0	0
NR_029410.1	2.09497	2.83941	1.46621	1.91178	0.942381	2.01076	1.35763	1.85685	1.24168	1.59897	1.74061	1.84176	2.06946	1.65513	1.75318	1.10435	1.94363	2.59483	1.53747	1.64244
NR_109985.1	0.0167431	0.0883659	0	0.11578	0	0.0149208	0.13539	0.06818	0.104024	0.0219395	0.157136	0.0343125	0.0743928	0.0512164	0.0845933	0.0351053	0.0637505	0.241022	0.0269526	0.0539639
NR_109777.1	0.0795693	0.170134	0.0875781	0	0.130364	0	0.125236	0.417002	0	0	0.128246	0.575182	0.112756	0.116046	0.108502	0	0.216776	0.31302	0.127667	0.0847819
NR_103732.1	0.149449	0	0	0	0.242251	0	0	0.153571	0.415009	0.269797	0	0	0	0	0	0	0	0	0.830711	0
NR_103733.1	0	0.791229	0	0	0	0	0.478752	0.216763	0	0	0	0	0.719748	0	0	0	0	0	0	0
NR_038378.4	0.167297	0.673347	0.120075	0.500119	0.173175	0.20158	0.748391	0.179525	0.194032	0.438642	0.670033	0.214531	0.83964	0.61847	0.4119	0.175509	0.326111	1.11884	0.519079	0.173703
NR_036494.1	0.0219289	0.0953309	0.0498006	0.110222	0.0177978	0.114528	0.141019	0.0692426	0.0573863	0.162671	0.154532	0.111329	0.125655	0.199411	0.127628	0.110506	0.0403826	0.130615	0.142962	0.0723145
NR_027128.1	1.27843	1.48458	1.45833	1.81324	0.816692	1.77371	1.65594	1.65563	1.28977	0.685386	1.82866	1.96018	2.06567	1.75049	2.1761	1.20506	1.61099	2.52207	1.12493	1.46057
NR_037871.1	3.13031	3.03144	4.39861	3.32714	4.86777	4.04863	3.79069	2.24208	5.62036	2.23646	1.75296	3.96052	2.41424	1.22934	1.21505	2.59703	3.29766	3.37609	3.68373	3.25666
NR_029405.1	0.503156	1.95303	0.979306	2.19604	0.769473	0.931559	1.77246	1.45666	1.22632	1.64233	2.69081	1.01953	2.0861	1.69144	2.16392	0.908601	1.47052	3.12901	2.46701	0.933822
NR_104662.1	0.357846	0	1.02571	0.836338	2.67086	0.721203	4.49559	0.929969	1.35905	21.7356	5.54288	0.404933	0.367361	0	1.43748	0	3.34486	4.92898	3.30764	1.93347
NR_104668.1	0	0.0698897	0.0361107	0	0	0	0.051609	0	0	0.129994	0	0	0.137825	0	0	0	0.0588605	0	0	0
NR_037808.1	0	0.0667411	0	0.262724	0	0	0	0	0	0.0838765	0	0	0	0	0.0786317	0	0	0	0.101274	0
NR_104157.1	0	0	0	0	0	0	0	0	0	0	0	0	0	0	0	0	0	0	0	0
NR_103825.1	0.169737	1.77794	0.221534	2.22907	0.741938	0.654501	3.00151	0.683178	0.6703	2.93194	1.74826	0.559468	2.3727	2.95452	2.50839	0.556671	0.655916	3.38089	4.79664	0.187634
NR_038839.1	0	0	0	0	0	0	0	0	0	0	0	0	0	0	0	0	0	0	0	0
NR_029406.1	0.103422	0.230636	0.0457678	0.324969	0.292254	0.403563	0.643202	0.185649	0.120944	0.454494	0.384477	0.177975	0.426627	0.564234	0.254215	0.177458	0.300723	0.423315	0.531366	0.157469
NR_038891.1	0	0	0	0.0564493	0	0	0	0	0	0	0	0	0.168178	0.0576957	0	0	0	0	0	0
NR_033738.1	0.156878	1.45637	0.194845	0.763925	0.208727	0.223021	1.26458	0.200997	0.234969	0.900592	1.0078	0.258487	1.13853	1.38898	1.09477	0.274426	0.141956	1.58399	0.785353	0.207974
NR_109945.1	0	0	0	0	0	0	0	0	0	0	0	0	0	0	0	0	0	0	0	0
NR_002193.2	0.0541776	0.149003	0	0.117141	0.12328	0.0219425	0.264039	0.0262404	0	0.109497	0.0851766	0	0.113227	0	0.142122	0.0606471	0	0.437162	0.0442427	0
NR_015382.2	0.467914	0.760306	0.572789	1.02718	1.05068	1.02919	1.28502	0.937267	1.05024	1.27889	0.634034	0.441338	0.757556	0.951444	0.965022	0.880721	0.780886	1.31711	0.9971	0.801188
NR_003570.2	0.0927183	0.0572278	0.0430129	0.0774535	0.125448	0.0111685	0.0906255	0.056659	0.0872969	0.109968	0.147439	0.0410981	0.0551414	0.0380574	0.0332315	0.0439737	0.0840279	0.052741	0.108154	0.0289259
NR_130774.1	0	0	0	0	0	0	0	0	0	0	0	0	0	0	0	0	0	0	0	0
NR_130779.1	0	0	0	0	0	0	0	0	0	0	0	0	0	0	0	0	0	0	0	0
NR_046845.1	0	0	0	0	0	0	0	0	0.578541	0	0	0	0	0.700499	0	0	0	0	0	0
NR_047022.1	0	0	0.0731336	0	0	0	0	0	0	0	0	0	0	0	0	0	0	0	0	0
NR_130921.1	0	0	0	0	0.124586	0	0	0	0	0	0	0	0	0	0	0.140952	0	0	0	0
NR_130922.1	0	3.23464e-08	7.50356e-10	1.04152e-07	0	4.16076e-09	3.91535e-09	7.72726e-10	3.23146e-08	3.30435e-08	2.12024e-08	5.24599e-10	1.04592e-08	1.59628e-08	6.64314e-09	0	3.243e-08	5.86859e-08	1.33233e-09	1.08588e-08
NR_130923.1	0.104864	0.170513	0.0293669	0.263351	0	0.13679	0.0419708	0.136447	0.190546	0.140956	0.369374	0.0797759	0.186809	0.230714	0.202678	0	0.143604	0.155967	0.12781	0.198836
NR_130924.1	0.0216871	0.117546	0	0	0.0351539	0.0188598	0.142006	0	0	0.274881	0.108875	0	0.165584	0.0331097	0.139721	0.071589	0.0395987	0.0472855	0.176217	0.0250536
NR_130925.1	0	0	0	0	0	0	0	0	0	0	0	0	0	0	0	0	0	0	0	0
NR_130930.1	0	0	0.0636726	0.0815703	0	0.0247153	0.0910001	0	0.0344281	0	0	0	0.0405034	0.0833714	0.0366202	0	0.0259466	0.0563608	0.00930307	0
NR_130933.1	0.529889	0.691693	0.696673	0.607255	1.06249	0.447247	1.56063	0.693819	0.184979	1.97162	1.2761	0.748252	0.701613	1.72591	0.709272	0.663016	0.531179	1.64464	0.760114	0.477476
NR_103745.2	0	0.161731	0	0	0	0.0648725	0	0	0	0.100272	0	0	0	0	0	0	0	0	0.121228	0
NR_130967.1	1.85794	0.917844	0.538965	0.510361	1.25519	1.11068	1.56571	1.52019	0.784351	0.57056	0.812988	1.35689	0	0.999418	0.48594	0.0703736	1.63997	0	0	1.05609
NR_038975.1	0.41451	8.38764	0.464329	4.75878	1.34381	0.600785	8.84819	1.00679	0.167377	5.38602	11.0317	0.700757	5.90739	8.10642	1.24624	0.912197	1.51372	12.0562	2.24538	0.299416
NR_040013.1	0	0	0	0	0	0	0	0	0	0.0174009	0	0	0	0	0	0	0	0	0	0
NR_040084.1	9.28936	7.64402	8.1393	5.68189	14.6705	10.5751	11.247	13.5878	12.2979	8.71144	8.8979	7.76982	6.90072	7.31951	6.24845	5.85856	13.1851	8.64122	8.73359	13.0034
NR_026933.2	0	0	0	0	0	0	0	0	0	0	0	0	0	0	0	0.0265348	0	0	0	0
NR_104345.1	0.479904	0.226017	0.580169	0.114007	0.520354	0.387095	0.0635934	0.568407	0.607369	0.242447	0.150259	0.332363	0.169829	0.422339	0.153547	0.371419	0.232684	0.19034	0.220529	0.446461
NR_126480.1	0.146135	0.316828	0.272832	0.419427	0.15792	0.127084	0.155971	0.0507062	0.118017	0.458341	0.610072	0.197641	1.04132	0.35724	0.439361	0.107198	0.0444717	0.289802	0.712448	0.105559
NR_110543.1	0.821934	0.892725	0.406987	0.607031	0.308989	0.516166	0.785596	0.519158	0.346372	0.245668	0.814081	0.567447	0.635215	0.884963	0.419807	0.621583	0.540312	1.02703	0.226458	0.375357
NR_120366.1	0	0.274524	0	0.181711	0	0.0550575	0	0.0659034	0.0766943	0.0851016	0	0	0	0	0.0815776	0	0	0	0	0
NR_108022.1	0	0	0	0	0	0	0	0	0	0	0	0	0	0	0	0	0	0	0	0
NR_102743.1	0.137092	0.0743055	0.0570985	0.146297	0	0.0443271	0	0.0530591	0.0830357	0	0	0.0517032	0.0726431	0.10054	0	0.224345	0.0465353	0	0.0828343	0.0940852
NR_126481.1	0.060856	0.0659693	0.0681702	0	0	0	0	0.0633476	0	0	0.190542	0.0617287	0.086729	0	0.156828	0.0669618	0	0.123427	0	0
NR_126330.1	0.245979	0.799941	0.378872	0.441244	0.448563	0.427823	0.147676	0.0640125	0.186235	0.20665	0.625762	0.249507	0.482016	0.135296	0.356566	0.270659	0.449136	0.548778	0.149902	0.366465
NR_130773.1	0	0	0	0	0	0	0	0	0	0.114237	0	0	0	0	0	0	0	0	0	0
NR_110418.1	0	0.0921275	0	0	0.13788	0.0722933	0	0	0	0	0	0.0842089	0	0.127168	0.106797	0.0910869	0	0	0	0
NR_040583.2	0.501257	1.23634	0.508044	0.737928	0	0.891494	1.29027	1.22877	0.329182	1.00621	1.44909	0.914103	1.02038	1.97363	0.585328	0	0.271396	0.453575	1.83846	0.684155
NR_110597.1	0	0.245094	0	0.54077	0.122164	0.13108	0.723943	0.0784511	0.0912965	0.202609	0.8259	0.0764462	0.537035	0.442169	0	0.082927	0.344026	0.448373	0.122475	0.244977
NR_120506.1	0	0	0	0	0	0	0	0	0	0	0	0	0	0	0	0	0	0	0	0
NR_121673.1	0.219287	0.0505104	0.1635	0.0778487	0.190739	0.0823042	0.111377	0.103921	0.224824	0.392108	0	0.0476104	0.066507	0	0.252527	0.256799	0.257318	0.122107	0.488633	0.222034
NR_126355.1	0.0770843	0.584928	0.518094	0.995587	0.124951	0.335175	0.617045	0.0802403	0	0.310845	0.241353	0	1.20842	0.33919	0.397297	0.254455	0.422247	0.305733	0.375806	0.167043
NR_104133.1	0.146237	0.697122	0.204547	0.627654	0.789301	0.280115	1.22761	0.234191	0.549667	1.19416	0.65318	0.29503	1.04039	0.756545	0.482641	0.47663	0.471743	0.897024	0.814636	0.181752
NR_110547.1	0.0969935	0	0	0	0.314445	0.0843486	0	0	0	0	0	0	0	0	0	0	0.177101	0	0.157623	0
NR_110822.1	0	0	0	0	0	0	0	0	0	0.0552484	0	0	0	0	0.0529606	0	0	0	0.0667943	0
NR_121669.1	0	0.159832	0	0	0	0	0.236051	0	0	0	0	0	0	0.216262	0	0	0	0	0	0.159755
NR_125739.1	0.291784	1.30842	0.376901	0.949364	0.422345	0.359423	1.72687	0.268969	0.364612	1.40054	2.0764	0.400599	1.28745	1.06708	0.996602	0.374792	0.488604	1.85708	0.730971	0.312276
NR_126482.1	0	0.0539104	0	0	0	0	0.0796187	0	0	0	0.0389279	0	0	0	0.0640802	0	0	0	0.0404093	0.0538847
NR_047003.1	0	0	0	0	0	0	0	0	0	0	0	0	0	0	0	0	0	0	0	0
NR_103765.1	0.122359	0.373272	0	0.352049	0.504962	0.373904	0.240691	0.572261	0.267886	0.635783	0.384571	0.124083	0.264433	0.358034	0.631902	0.201888	0.111794	0.553506	0.520643	0.266414
NR_120309.1	3.47374	7.83653	3.78607	10.7784	5.32642	3.67403	11.8742	3.32277	3.75311	12.115	11.6112	4.19016	7.89419	15.8361	7.62123	2.68591	4.37134	14.3361	7.17083	2.84829
NR_120590.1	0.0650934	0	0	0.186826	0	0.0566073	0	0	0	0	0	0	0	0	0.167748	0	0	0	0	0
NR_125774.1	0	0.174302	0.10971	0.0492895	0	0	0.356047	0.104422	0.00941089	0.349263	0	0	0	0	0	0	0	0	0.4865	0.108692
NR_125425.1	0	0	0	0	0	0	0	0	0	0	0	0	0	0	0	0	0	0	0	0
NR_120534.1	0.0486041	0.235698	0	0.175233	0.157571	0.0845352	0.235272	0.101188	0.0588782	0.150657	0.927411	0.055073	0.24486	0.143533	0.717351	0.213922	0.0491342	0.385548	0.260426	0.263314
NR_120609.1	0.0170633	0.277348	0.0764235	0.299251	0.0572146	0.0983219	0.113705	0.0532186	0.086637	0.285867	0.11417	0.0692695	0.340413	0.341329	0.366432	0.0188576	0.034449	0.33852	0.279147	0.0196477
NR_110259.1	0.103628	0.168502	0.174123	0.148712	0.335952	0.0450589	0.0829518	0.323611	0.502131	0	0.324461	0	0.147685	0.303991	0.200288	0.228049	0.331125	0.51376	0.168404	0.112281
NR_103707.1	0	0.0633938	0.0218362	0.0279742	0	0	0	0	0	0.0262025	0	0	0	0.0571837	0	0	0	0.0386574	0	0
NR_121672.1	0	0	0	0	0	0	0	0	0	0	0	0	0	0	0	0	0	0	0	0
NR_126365.1	0	0.050941	0	0.0674372	0.0761731	0	0	0	0.0569261	0.126333	0.0735675	0	0.0669715	0.0689782	0.0605506	0	0	0	0	0
NR_125803.1	0	0	0	0	0	0	0	0	0	0	0	0	0	0	0	0	0	0	0	0
NR_120337.1	0	0.0693302	0	0	0	0.0556185	0.204783	0	0.0774758	0	0	0	0.0911475	0.093808	0	0	0	0	0	0
NR_126356.1	0	0	0	0	0	0	0	0.132144	0	0	0	0	0	0.186435	0	0.139295	0	0	0	0
NR_120602.1	0	0	0	0	0.527569	0	0	0.338792	0.394266	0.437485	0	0	0	0.954757	0	0	0	0.645435	0	0
NR_126406.1	0	0	0	0	0	0	0.182236	0	0	0	0	0	0	0.166959	0	0	0	0	0	0
NR_120607.1	0	0	0	0	0	0	0	0	0	0	0	0	0	0	0	0	0	0	0	0
NR_126420.1	0	0	0	0	0	0	0	0	0	0	0	0	0	0	0	0	0.0881614	0	0.15693	0
NR_125783.1	0	0	0	0	0	0	0	0	0	0	0	0	0	0	0	0	0	0	0	0
NR_125776.1	0	0	0	0	0	0	0	0.0645091	0	0	0	0	0	0	0.159703	0	0	0	0.10071	0
NR_046669.1	0	0	0	0	0	0	0	0	0	0	0	0	0	0	0	0	0	0	0	0
NR_126448.1	0.0956093	0.193641	0	0.165243	0	0.0908406	0.398213	0	0.12184	0.496669	0.100229	0.220566	0.141036	0.266735	0.205403	0	0.193043	0.19845	0	0
NR_126557.1	0	0	0	0	0	0	0	0	0	0	0	0	0	0	0	0	0	0	0	0
NR_125777.1	0	0.107878	0.222916	0.392612	0.242169	0.173239	0.159866	0.10359	0.361564	0.267679	0.389339	0.101046	0.0708771	0.438629	0.0641758	0.05473	0.31774	0.296274	0.324044	0.108568
NR_125740.1	0	0	0	0	0	0	0	0	0	0	0	0	0	0	0	0	0	0	0	0
NR_126403.1	0.192478	0.553536	0	0.138821	0	0.100913	0.156055	0.200946	0	0.683951	0.193622	0	0.138208	0	0.131751	0.214371	0	0.566587	0.155686	0
NR_046876.1	0	0	0	0	0	0	0	0	0	0	0	0	0	0	0	0	0	0	0	0
NR_126407.1	0	0	0	0	0	0	0	0	0.315512	0	0	0	0	0	0	0	0	0	0	0
NR_117096.1	0	0.108579	0.187002	0	0.10824	0.0871047	0.106904	0.0358387	0.0404452	0.0448788	0.0522687	0.237064	0.0957676	0	0.172082	0.0734748	0.0304813	0	0.0542577	0.217054
NR_046556.1	0	0	0	0	0	0	0	0	0	0	0	0	0	0	0	0	0	0	0	0
NR_126470.1	0	0	0	0	0	0	0	0	0	0	0	0	0	0	0	0	0	0	0	0
NR_122109.1	0.113518	0	0	0	0	0	0.104785	0	0.0983305	0	0	0	0.0935545	0.191756	0.0643758	0	0	0	0.105917	0
NR_046606.1	0	0	0	0	0	0	0	0	0	0	0	0	0	0	0	0	0	0	0	0
NR_126449.1	0	0	0.14954	0	0.0998997	0	0	0.176959	0	0	0	0	0	0	0	0.023638	0	0	0.197668	0.0460764
NR_126384.1	0	0	0	0.177616	0	0	0	0	0	0	0	0	0	0	0.159478	0	0	0	0	0
NR_126028.1	0	0	0.223722	0	0	0	0	0	0	0	0	0	0	0	0	0	0	0	0	0
NR_126359.1	0	0	0.318677	0	0.133625	0	0.18695	0	0.132963	0.526876	0.133859	0.0907272	0.14274	0.295818	0	0	0.126699	0	0	0
NR_126418.1	0.898779	2.54565	0.580815	1.9757	0.661058	0.594917	2.12754	0.315626	0.363209	1.83699	4.71271	0.442281	1.84422	3.33895	1.60214	0.529322	0.401452	2.93225	2.15542	0.546198
NR_125792.1	0	0.474663	0	0	0.36524	0.195948	0.978746	0	0	1.49217	0.555949	0.685663	0.540625	0.577921	0	0.24793	0.41142	0	0	0.244139
NR_126400.1	0	0	0	0	0	0	0	0	0	0	0	0	0	0	0	0	0	0	0	0
NR_125857.1	3.99437	7.22474	3.41369	6.06935	3.05885	2.57995	10.1399	4.50954	3.68192	11.2006	5.83998	4.27755	7.88018	9.46715	8.47488	4.81597	6.00321	8.55272	9.16404	4.04598
NR_110731.1	0.260502	0.774043	0.291812	0.747674	0.328428	0.326616	0.946858	0.361557	0.504068	0.56846	1.07328	0.322957	1.50725	1.90222	0.658888	0.311007	0.369953	0.861006	0.423339	0.280136
NR_125752.1	0	0	0.0773898	0	0	0	0	0	0	0.0831436	0.301477	0	0.0903623	0.0922337	0.0759063	0.06486	0	0	0	0
NR_104082.1	0	0	0	0	0	0	0	0	0	0	0	0	0	0	0	0	0	0	0	0
NR_003260.1	0.0506063	0.0835541	0.126119	0.0733827	0.0611528	0.054234	0.132843	0.052305	0.0605569	0.137095	0.0792389	0.113699	0.180135	0.189439	0.222162	0	0.0344527	0.128832	0.149611	0.0136598
NR_033787.2	0.126528	0.86798	0.120682	0.319166	0.118576	0.19282	0.505936	0.121797	0.0204144	0.134681	0.517853	0.124128	0.76	0.660656	0.362242	0.127943	0.0515335	0.826582	0.49194	0.187146
NR_024595.3	0.0414297	0.133554	0.0769313	0.254489	0.132648	0.0826081	0.240846	0.0705864	0.0653708	0.222735	0.255376	0.0546736	0.0961545	0.262227	0.167062	0.0601074	0.061665	0.136241	0.0905671	0.0594952
NR_125415.1	1.08856	1.60912	0.666866	0.429348	0.481229	0.863929	2.53489	0.933649	1.44579	1.07169	1.10595	1.00631	0.142594	2.3343	1.27511	0.873388	0.729347	0.797399	1.77736	0.967069
NR_121620.1	0.0322127	0.0698385	0.0360842	0	0	0	0	0	0	0.0432995	0	0	0	0.0472479	0.0415065	0	0	0	0.0523484	0
NR_125388.1	0	0.160803	0	0.0425752	0	0	0.0237485	0	0	0	0.162559	0	0.0845622	0.0870305	0.0191137	0	0.0135427	0.0882516	0.0241064	0.0482179
NR_125386.1	0.0732174	0.134307	0.0273214	0.0707936	0.0610146	0.0786291	0.183324	0.0780295	0.0721579	0.144223	0.239197	0	0.157783	0.199791	0.0396246	0.0586033	0.0930026	0.169466	0.12188	0.0906934
NR_121621.1	0.575608	0.415981	0.21493	0.275344	0.311013	0.166856	0.307175	0.599174	0.232427	0.515812	0.300374	0	0.273442	0.562848	0.494453	0	0.350336	0	0	0.207891
NR_031615.1	0	0	0	0	0	0	0	0	0	0	0	0	0	0	0	0	0	0	0	0
NR_031643.1	0	0	0	0	0	0	0	0	0	0	0	0	0	0	0	0	0	0	0	0
NR_031645.1	0	0	0	0	0	0	0	0	0	0	0	0	0	0	0	0	0	0	0	0
NR_031614.1	0	0	0	0	0	0	0	0	0	0	0	0	0	0	0	0	0	0	0	0
NR_030625.1	0	0	0	0	0	0	0	0	0	0	0	0	0	0	0	0	0	0	0	0
NR_030306.1	0	0	0	0	0	0	0	0	0	0	0	0	0	0	0	0	0	0	0	0
NR_030286.1	0	0	0	0	0	0	0	0	0	0	0	0	0	0	0	0	0	0	0	0
NM_025031.2	0	0.125342	0	0.165931	0	0	0	0	0	0	0	0.234569	0	0	0	0	0	0	0	0.250564
NM_001256871.1	0	0	0	0	0	0	0	0	0	0	0	0	0	0	0	0	0	0	0	0
NM_001256873.1	0	0	0	0	0	0	0	0	0	0	0	0	0	0	0	0	0	0	0	0
NM_152460.2	0.131754	0.219168	0.246968	0.211539	0.185901	0.167687	0.203018	0.139017	0.116488	0.362412	0.233319	0.156031	0.41258	0.436951	0.251848	0.0689912	0.194144	0.424466	0.301703	0.151343
NR_033149.1	8.72668e-08	0	0	0	0.752919	0	0	0	0	0.256302	0.183222	3.52417e-10	0	0.217416	3.15375e-09	0	9.91458e-11	1.33867e-09	0	0
NR_037892.1	1.49728	2.14377	1.695	0.703581	1.69148	1.6378	0	1.1648	0.947132	0.935048	1.21251	2.12886	2.68188	1.98203	0.483096	1.57457	1.75022	1.02688	1.66025	2.40999
NR_110880.1	0	0	0	0.312922	0	0	0.523646	0.113491	0	0.293104	0.512052	0.221182	0.621522	1.11941	0	0	0.199074	0.216213	0	0.118132
NR_121581.1	0	0	0	0	0	0	0	0	0	0	0	0	0	0	0	0	0	0	0	0
NM_001294306.1	0.221679	0.862567	0.466917	0.877793	0.208719	0.21903	0.989685	0.203324	0.270706	0.753662	1.13624	0.225215	1.3174	1.40389	0.700162	0.159111	0.152411	1.1005	0.3616	0.18024
NR_039634.1	0	0	0	0	0	0	0	0	0	0	0	0	0	0	0	0	0	0	0	0
NR_030220.1	0	0	0	0	0	0	0	0	0	0	0	0	0	0	0	0	0	0	0	0
NR_001554.2	0	0	0	0	0	0	0	0	0	0	0	0	0	0	0	0	0	0	0	0
NR_030354.1	0	0	0	0	0	0	0	0	0	0	0	0	0	0	0	0	0	0	0	0
NR_024121.1	0.167703	6.18097	0.375717	6.49791	0.815518	1.02088	2.14788	0.523706	0.406304	1.12711	1.83778	0.680429	4.30202	4.67357	1.29652	0.369057	0.30621	1.33029	1.90772	0.181707
NR_026834.1	0.0226298	0.0508035	0.0268399	0.16623	0	0.0196783	0.0760912	0	0	0.0608244	0.145971	0.0500017	0.0644885	0.0995633	0.0657524	0.0248952	0.0413162	0.23846	0.0735357	0.0245145
NR_030193.1	0	0	0	0	0	0	0	0	0	0	0	0	0	0	0	0	0	0	0	0
NR_030203.1	0	0	0	0	0	0	0	0	0	0	0	0	0	0	0	0	0	0	0	0
NR_120600.1	3.48505	2.23271	1.60848	1.76131	5.1742	2.66935	2.03381	2.11103	3.40332	2.4891	0.384872	2.46103	1.93629	1.80631	2.44631	5.21977	1.92034	2.04282	2.60521	3.09325
NR_030157.1	0	0	0	0	0	0	0	0	0	0	0	0	0	0	0	0	0	0	0	0
NR_030380.1	0	0	0	0	0	0	0	0	0	0	0	0	0	0	0	0	0	0	0	0
NR_030630.1	0	0	0	0	0	0	0	0	0	0	0	0	0	0	0	0	0	0	0	0
NR_039815.1	0	0	0	0	0	0	0	0	0	0	0	0	0	0	0	0	0	0	0	0
NR_015450.1	0	0	0	0.0434854	0	0	0	0	0	0	0	0	0	0	0	0	0	0	0	0
NR_002944.2	4.24097	6.6888	4.9688	3.06795	1.93595	3.52593	3.52088	1.40964	2.06789	1.03391	6.40036	4.16239	4.57347	4.93387	1.04885	0.645635	1.65574	4.12072	0.568534	2.09858
NR_046649.1	0	0	0	0.170416	0	0	0	0	0	0	0.185907	0	0	0	0	0	0	0	0	0
NR_024159.1	0.0411598	0.133854	0.0461067	0.0590668	0.0333592	0.0536908	0.164738	0.0428449	0.0249302	0.138315	0.16109	0.020875	0.175977	0.332041	0.159105	0.0459505	0	0.20406	0.304638	0.0445968
NR_039636.1	0	0	0	0	0	0	0	0	0	0	0	0	0	0	0	0	0	0	0	0
NR_110947.1	0	0	0	0	0	0	0	0	0	0	0	0	0	0	0	0	0	0	0	0
NR_046633.1	0	0.379203	0	0	0	0	0	0.379661	0	0	0	0	0	0	0	0	0	0.74989	0	0
NR_027318.2	0	0	0	0	0	0	0	0.0145428	0	0	0	0	0.0200133	0	0.0188429	0.0307449	0.038264	0	0.0227037	0
NR_030216.1	0	0	0	0	0	0	0	0	0	0	0	0	0	0	0	0	0	0	0	0
NR_024468.1	0	0	0	0	0	0	0	0	0	0	0	0	0	0	0	0	0	0	0	0
NR_030221.1	0	0	0	0	0	0	0	0	0	0	0	0	0	0	0	0	0	0	0	0
NR_046766.1	0	0	0	0	0	0	0	0	0	0	0	0	0	0	0	0	0	0	0	0
NR_046724.1	0.221269	0.893734	0.379975	0.923901	0.417626	0.206894	1.28911	0.203994	0.552279	0.823989	1.06098	0.303027	1.06811	1.70151	0.834607	0.443967	0.284616	1.19008	1.01909	0.367062
NR_122034.1	0	0.0921951	0.0890517	0.052101	0	0	0	0.0945484	0.105397	0.181389	0.063115	0.0402608	0.0726902	0	0.0547842	0.0607277	0.0738671	0.242445	0	0.0459836
NR_030393.1	0	0	0	0	0	0	0	0	0	0	0	0	0	0	0	0	0	0	0	0
NR_030277.1	0	0	0	0	0	0	0	0	0	0	0	0	0	0	0	0	0	0	0	0
NR_030373.1	0	0	0	0	0	0	0	0	0	0	0	0	0	0	0	0	0	0	0	0
NR_031650.1	0	0	0	0	0	0	0	0	0	0	0	0	0	0	0	0	0	0	0	0
NR_110569.1	0.21685	0.294686	0.196448	0.445635	0.0978976	0.281898	0.686255	0.136421	0.197933	0.531043	1.04145	0.0644285	0.170116	0.754831	0.761682	0.118869	0.367968	0.783263	0.375493	0.174812
NR_031647.1	0	0	0	0	0	0	0	0	0	0	0	0	0	0	0	0	0	0	0	0
NR_033874.1	7.39466	9.88016	8.86133	5.79947	11.2896	7.25316	7.70883	7.69742	5.72881	8.66837	8.2112	9.33227	7.72007	7.31482	2.54822	3.40601	13.5805	6.99116	3.9125	5.21722
NR_046731.1	0	0	0	0	0	0	0	0	0	0	0	0	0	0	0	0	0	0	0	0
NR_031595.1	0	0	0	0	0	0	0	0	0	0	0	0	0	0	0	0	0	0	0	0
NR_036257.1	0	0	0	0	0	0	0	0	0	0	0	0	0	0	0	0	0	0	0	0
NR_036173.1	0	0	0	0	0	0	0	0	0	0	0	0	0	0	0	0	0	0	0	0
NR_030227.1	0	0	0	0	0	0	0	0	0	0	0	0	0	0	0	0	0	0	0	0
NR_030155.1	0	0	0	0	0	0	0	0	0	0	0	0	0	0	0	0	0	0	0	0
NR_030392.1	0	0	0	0	0	0	0	0	0	0	0	0	0	0	0	0	0	0	0	0
NR_030181.1	0	0	0	0	0	0	0	0	0	0	0	0	0	0	0	0	0	0	0	0
NR_046721.1	0	0.179487	0.0627757	0.133882	0	0.0147495	0.0570814	0	0.0616354	0.0452712	0.276281	0	0.0756084	0.259839	0.0674298	0.0376481	0.0158502	0.17303	0.028288	0.0595863
NR_031682.1	0	0	0	0	0	0	0	0	0	0	0	0	0	0	0	0	0	0	0	0
NR_029962.1	0	0	0	0	0	0	0	0	0	0	0	0	0	0	0	0	0	0	0	0
NR_030371.1	0	0	0	0	0	0	0	0	0	0	0	0	0	0	0	0	0	0	0	0
NR_046571.1	0	0	0	0	0	0	0	0	0	0	0	0	0	0	0	0	0.033624	0	0	0
NR_029409.1	0.545438	1.7738	0.475217	2.0873	0.687659	0.685144	1.5524	1.00937	0.14683	1.46633	1.42315	0.307366	1.90014	2.66673	0	0.333424	0.608618	1.20185	0.492436	1.11631
NR_015447.1	0.604652	4.10267	0.602066	2.47459	0.943817	0.779	2.68896	0.699342	0.678209	1.65562	3.78637	0.908626	2.58516	2.79201	1.58706	0.566752	0.960924	3.90814	1.63769	0.533821
NR_102711.1	0	0	0	0	0	0	0	0	0	0	0	0	0	0	0	0	0	0	0	0
NR_027433.1	0	0	0	0	0	0	0	0.0249929	0	0	0	0	0	0.0352164	0	0	0	0	0	0
NR_030388.1	0	0	0	0	0	0	0	0	0	0	0	0	0	0	0	0	0	0	0	0
NR_039615.1	0	0	0	0	0	0	0	0	0	0	0	0	0	0	0	0	0	0	0	0
NR_030212.1	0	0	0	0	0	0	0	0	0	0	0	0	0	0	0	0	0	0	0	0
NR_030266.1	0	0	0	0	0	0	0	0	0	0	0	0	0	0	0	0	0	0	0	0
NR_024385.1	0	0	0	0	0	0	0	0	0	0	0	0	0	0	0	0	0	0	0	0
NR_024620.1	0	0	0	0	0	0	0	0	0	0	0	0	0	0	0	0	0	0	0	0
NR_047031.1	0	0	0	0	0	0	0	0	0	0	0	0	0	0	0	0	0	0	0	0
NR_036504.1	5.19083	13.1889	6.34234	9.25597	8.40878	6.53563	14.0328	6.77998	5.51319	10.8719	14.4969	6.65604	12.9953	12.1515	10.6651	5.14448	5.42364	15.5648	11.289	5.34693
NR_046564.2	0	0.189383	0	0	0	0.0759641	0	0	0	0.117416	0	0	0	0	0	0	0	0	0	0
NR_125754.1	0.610251	0.661526	0	0.437874	0.494596	0.530693	1.95398	0.317618	0	0.820285	0.477678	0	0.434849	0	0.786317	0.335739	0.835697	0.605096	0.495855	0.330605
NR_110948.1	0	0	0	0	0	0	0	0	0	0	0	0	0	0	0	0	0	0	0	0
NR_031723.1	0	0	0	0	0	0	0	0	0	0	0	0	0	0	0	0	0	0	0	0
NR_030222.1	0	0	0	0	0	0	0	0	0	0	0	0	0	0	0	0	0	0	0	0
NR_126362.1	0	0.180416	0	0	0	0.144735	0	0	0	0	0.260552	0	0	0	0.4289	0	0	0	0	0
NR_036539.1	5.25014	80.5618	6.05244	89.3141	7.18829	6.02848	100.537	5.88956	3.64307	93.1813	88.7351	2.89538	95.3803	127.472	11.8878	4.43082	7.72486	88.3468	20.6257	4.36307
NR_002211.1	0.0228999	0.0220983	0	0.0356865	0	0	0.0362865	0.0209469	0.0286854	0.0304835	0.0335771	0	0	0	0.10105	0.0213172	0.037243	0.0469884	0	0.0453586
NR_110949.1	0	0	0	0	0	0	0	0	0	0	0	0	0	0	0	0	0	0	0	0
NR_030631.1	0	0	0	0	0	0	0	0	0	0	0	0	0	0	0	0	0	0	0	0
NR_030207.1	0	0	0	0	0	0	0	0	0	0	0	0	0	0	0	0	0	0	0	0
NR_120599.1	0	0	0.618037	0	0	0	0	0	0	0	0.83932	0.508716	0	0	0	0	0	0	0	0
NR_125757.1	0	0	0	0	0	0	0	0	0	0	0	0	0	0	0	0	0	0	0	0
NR_030186.1	0	0	0	0	0	0	0	0	0	0	0	0	0	0	0	0	0	0	0	0
NR_121586.1	0	0.117605	0.30382	0.311377	0	0.0665494	0.26053	0.228234	0.262844	0.145828	0.339682	0	0.311951	0.180093	0.0703274	0.0596869	0	0.434946	0.088152	0
NR_103768.1	2.32694	1.92893	2.45328	1.57143	3.99375	2.02358	3.72534	2.84966	3.31625	2.02388	3.21428	2.49915	2.34087	1.2046	1.41096	2.40979	3.62396	2.98589	0.444879	2.37294
NM_001309242.1	0	0	0	0	0	0	0	0	0	0	0	0	0	0.0150822	0	0	0	0.0187849	0	0
NR_126055.1	0	0	0	0	0	0	0	0	0	0	0	0	0	0	0	0	0	0	0	0
NR_110312.1	0	0.0411268	0	0	0	0	0	0.0130242	0	0	0	0	0	0	0	0.0281018	0	0.0243417	0	0
NR_132103.1	0	1.6761	0.726332	1.40852	0.211344	0.566321	1.24059	0.496709	0.766096	0.609969	1.51308	0.817331	1.22953	0.71963	0.666927	0.362775	0.528808	1.97891	0.741147	0.596252
NR_132104.1	0.468349	0	4.65868e-07	0	0.536891	0.0576716	0.325909	0.249814	0.104221	0.684292	0.239549	0.132869	0.369727	0.738783	0.285707	0.311549	0.235175	0	0.699088	0
NR_132119.1	0.879239	3.4586	1.0554	2.47738	0.548045	0.883493	2.22014	0.784757	0.890308	1.83647	2.90023	0.753116	2.65595	2.69676	1.95853	0.965101	1.32096	1.86895	2.76341	0.927323
NR_130761.1	0	0	0	0	0	0	0	0	0	0	0	0	0	0	0	0	0.0922746	0	0	0
NR_103522.1	0.129813	0.188194	0	0.0956627	0	0	0	0.137747	0	0	0	0.121648	0	0.14219	0	0	0	0	0	0.18546
NR_109775.1	0	1.22128	0.315506	0.404191	0	0	0	0.293186	0	0.378593	0	0	0.401399	0	1.08875	0.309913	0.514275	0.55855	0	0.610348
NR_103996.1	13.1575	1.38516	0.00163772	0	26.1871	2.4665	2.67612e-06	0.708301	2.12152	4.06241	0	5.28247	0.206297	0	1.99913e-09	0.0658027	1.19505	0	7.51901e-09	4.05333
NR_103995.1	0	2.62121e-08	0	0	3.08904e-07	0	0	0	0	0	0	0	0	0	0	0	0	0	0	0
NR_028058.1	0.890418	2.56903	0.963858	2.14149	1.27859	1.42844	1.70439	1.07601	1.15989	1.40018	2.21364	0.832493	2.40562	2.53141	1.7646	0.640533	0.727034	3.6375	1.57119	1.41084
NR_003614.3	4.96931	6.57802	5.94046	4.35507	2.4704	5.67189	5.15839	3.89745	4.56752	3.91817	1.33431	4.94329	2.28964	4.11486	3.05954	3.42059	6.35465	4.23198	3.5992	5.44605
NR_002217.1	8.72957	13.1748	9.25995	8.73737	6.67992	9.2971	5.17665	7.73772	5.15874	5.37086	9.58416	8.07493	10.2313	10.0539	7.47471	4.92584	8.20108	9.86594	7.3473	7.55919
NR_027775.2	4.79573	4.4379	4.84237	4.78161	3.52589	4.60844	5.05136	5.26712	5.75476	2.75818	4.23372	4.76019	5.2868	2.76892	4.40186	3.53068	4.04936	5.684	2.95009	4.33329
NR_130940.1	2.57508	6.16996	4.62468	2.764	4.05206	4.39082	4.92805	3.50846	0.962395	2.13696	7.00408	2.79653	6.26053	5.81107	4.35656	1.7162	2.53833	5.78178	4.05022	2.82154
NR_027777.2	0.797237	1.60211	1.22381	1.14858	0.434183	0.901458	1.82449	0.981087	0.977568	0.731516	1.42651	0.522488	1.42193	1.57699	0.836054	0.789246	1.32675	1.95384	1.58301	1.26822
NR_073465.1	0.488968	1.13979	0.400612	0	0.517389	0	9.3514e-09	0.21619	0.342084	1.41414	0	0.00216534	0	1.24908	1.71866	0	1.37685e-06	1.29769	1.364e-08	0.388766
NR_036103.1	0	0	0	0	0	0	0	0	0	0	0	0	0	0	0	0	0	0	0	0
NR_037503.1	0	0	0	0	0	0	0	0	0	0	0	0	0	0	0	0	0	0	0	0
NR_039718.1	0	0	0	0	0	0	0	0	0	0	0	0	0	0	0	0	0	0	0	0
NR_049858.1	0	0	0	0	0	0	0	0	0	0	0	0	0	0	0	0	0	0	0	0
NR_024577.2	0	0	0	0	0	0	0	0	0	0.444064	0	0	0	0	0	0	0	0	0	0
NR_037566.1	1.26984	2.61657	0.929284	1.88501	1.087	1.89301	1.76391	0.782023	1.3052	1.78439	2.0247	1.34053	1.80897	2.06284	1.34219	1.06095	1.16678	2.50146	2.23394	1.35654
NR_024494.1	0.0946176	0.157349	0.205453	0.228169	0.847289	0	0.658059	0	0	0	0.136978	0.0251946	0	0	0.307483	0.35182	0	0	0.214835	0.217593
NR_132360.1	2.72503	2.98443	3.43108	3.04023	2.7909	2.0647	4.38479	3.8698	2.70375	2.8074	3.68031	2.85851	3.27997	2.57274	1.60077	1.88376	4.93636	4.77319	2.37954	2.90677
NM_001291380.1	0	0	0	0	0	0	0	0	0	0	0	0	0	0	0	0	0	0	0	0
NR_104195.1	0.822608	0	4.44171	1.04112	6.49352	2.01898	0	0.726208	0	0	0	0	0	0	0	0	0	2.92635	0	0.733614
NR_002557.1	2.31299	3.84513	3.45485	2.85198	2.82621	2.85043	3.18315	2.67408	3.89051	1.51346	2.81164	3.16398	3.1447	2.86893	3.49345	3.32687	3.8328	3.21343	3.42181	3.34943
NR_002556.1	0	4.19483e-06	0	0	0	0	0	0	0	1.51346	0	0	0	0	0	0	0	0	0	0
NR_033906.2	0	0	0	0	0	0	0	0	0	0	0	0	0	0	0	0	0	0	0	0
NR_015375.2	0.303775	0.547752	0.234748	0.613706	0.530721	0.121494	0.681682	1.02436	0.423099	0.202655	0.437428	0.155586	0.302317	0.435603	0	0.719233	0.57396	0.70318	0	0.075687
NR_049850.1	0	0	0	0	0	0	0	0	0	0	0	0	0	0	0	0	0	0	0	0
NR_111945.1	0	0	0	0.0329263	0	0	0.0183663	0	0	0.0154205	0.0179597	0	0.0326989	0.0547975	0.0147819	0.0378693	0.020947	0.068251	0	0
NR_040106.1	0	0	0	0	0	0	0	0	0	0	0	0	0	0	0	0	0	0	0	0
NR_111947.1	0	0	0	0.0329263	0	0	0.0183663	0	0	0.0154205	0.0179597	0	0.0326989	0.0547975	0.0147819	0.0378693	0.020947	0.068251	0	0
NR_126445.1	2.88637	3.72461	0	0	2.03708	1.73429	3.3915	0.000135409	3.12251	0.515116	4.85806	2.31372e-05	0.878381	0	7.82451e-05	0.376076	0	0	1.58182	0.000410104
NR_126446.1	0.384077	0.886808	0.947399	0.928837	0	0.403144	0	0.456587	0	0.115656	0.320206	0	1.87496	0.947783	1.55621	0.706148	0.362157	3.38751	0	0
NR_132757.1	0	0	0	0	0	0	0	0	0	0	0	0	0	0	0	0	0	0	0	0
NR_132755.1	0	0	0	0	0	0	0	0	0	0	0	0	0	0	0	0	0	0	0	0
NR_132752.1	0	0	0	0	0	0	0	0	0	0	0	0	0	0	0	0	0	0	0	0
NR_132762.1	0	0	0	0	0	0	0	0	0	0	0	0	0	0	0	0	0	0	0	0
NR_132770.1	0	0	0	0	0	0	0	0	0	0	0	0	0	0	0	0	0	0	0	0
NR_132771.1	0	0	0	0	0	0	0	0	0	0	0	0	0	0	0	0	0	0	0	0
NR_132772.1	0	0	0	0	0	0	0	0	0	0	0	0	0	0	0	0	0	0	0	0
NR_132768.1	0	0	0	0	0	0	0	0	0	0	0	0	0	0	0	0	0	0	0	0
NR_132767.1	0	0	0	0	0	0	0	0	0	0	0	0	0	0	0	0	0	0	0	0
NR_132769.1	0	0	0	0	0	0	0	0	0	0	0	0	0	0	0	0	0	0	0	0
NR_132783.1	0	0	0	0	0	0	0	0	0	0	0	0	0	0	0	0	0	0	0	0
NR_132776.1	0	0	0	0	0	0	0	0	0	0	0	0	0	0	0	0	0	0	0	0
NR_132778.1	0	0	0	0	0	0	0	0	0	0	0	0	0	0	0	0	0	0	0	0
NR_132774.1	0	0	0	0	0	0	0	0	0	0	0	0	0	0	0	0	0	0	0	0
NR_132775.1	0	0	0	0	0	0	0	0	0	0	0	0	0	0	0	0	0	0	0	0
NR_132777.1	0	0	0	0	0	0	0	0	0	0	0	0	0	0	0	0	0	0	0	0
NR_132784.1	0	0	0	0	0	0	0	0	0	0	0	0	0	0	0	0	0	0	0	0
NR_132782.1	0	0	0	0	0	0	0	0	0	0	0	0	0	0	0	0	0	0	0	0
NR_132773.1	0	0	0	0	0	0	0	0	0	0	0	0	0	0	0	0	0	0	0	0
NR_132975.1	0	0	0	0	0	0	0	0	0	0	0	0	0	0	0	0	0	0	0	0
NR_132966.1	0	0	0	0	0	0	0	0	0	0	0	0	0	0	0	0	0	0	0	0
NR_132963.1	0	0	0	0	0	0	0	0	0	0	0	0	0	0	0	0	0	0	0	0
NR_132788.1	0	0	0	0	0	0	0	0	0	0	0	0	0	0	0	0	0	0	0	0
NR_132964.1	0	0	0	0	0	0	0	0	0	0	0	0	0	0	0	0	0	0	0	0
NR_132787.1	0	0	0	0	0	0	0	0	0	0	0	0	0	0	0	0	0	0	0	0
NR_132789.1	0	0	0	0	0	0	0	0	0	0	0	0	0	0	0	0	0	0	0	0
NR_132972.1	0	0	0	0	0	0	0	0	0	0	0	0	0	0	0	0	0	0	0	0
NR_132967.1	0	0	0	0	0	0	0	0	0	0	0	0	0	0	0	0	0	0	0	0
NR_132852.1	0	0	0	0	0	0	0	0	0	0	0	0	0	0	0	0	0	0	0	0
NR_132976.1	0	0	0	0	0	0	0	0	0	0	0	0	0	0	0	0	0	0	0	0
NR_132973.1	0	0	0	0	0	0	0	0	0	0	0	0	0	0	0	0	0	0	0	0
NR_132974.1	0	0	0	0	0	0	0	0	0	0	0	0	0	0	0	0	0	0	0	0
NR_034018.2	0	0	0	0	0	0	0	0	0	0	0	0	0	0	0	0	0	0	0	0
NR_132980.1	0	0	0	0	0	0	0	0	0	0	0	0	0	0	0	0	0	0	0	0
NR_132981.1	0	0	0	0	0	0	0	0	0	0	0	0	0	0	0	0	0	0	0	0
NR_015411.1	0	0	0	0	0	0	0	0	0	0	0	0	0	0	0	0	0	0	0	0
NR_133001.1	0	0	0	0	0	0	0	0	0	0	0	0	0	0	0	0	0	0	0	0
NR_131786.1	0	0	0	0	0	0	0	0	0.0631172	0	0	0	0	0.0827343	0	0	0	0.388124	0.159027	0.202262
NR_027116.2	0.0676664	0.0733519	0.0757991	0	0	0.0784598	0.0722209	0.0234789	0.0273233	0	0.141244	0.0686367	0.0642899	0.0661664	0.145315	0.0248185	0.0617764	0.13419	0.183273	0.024439
NR_126015.1	0	0.0184889	0	0.0471136	0	0.0147157	0.0518112	0.0175741	0.0203059	0.0448901	0.1301	0.0170199	0.099084	0.133201	0.0864581	0.0569602	0.0153082	0.129731	0.0272382	0
NR_126016.1	1.37612	1.64836	2.40092	2.30685	0.868559	3.60672	0.857843	5.019	5.17003	0.568609	4.88533	1.43154	3.81378	3.14371	3.45212	2.96031	3.11071	3.18779	2.60642	5.555
NR_027115.3	0	0	0	0.153416	0	0	0	0	0	0	0	0	0	0	0	0	0	0	0	0
NR_133566.1	0	0	0.114596	0.0734038	0	0.0444819	0	0	0	0	0	0	0	0	0	0	0	0	0	0
NR_126017.1	3.187	1.82163	2.46861	2.59314	2.12795	2.86286	2.95954	0.231092	0.0926939	2.70073	0	3.90992	0.1206	0.493438	1.08568	0.993715	2.56301	0.330614	2.5889	0.00128468
NR_122120.1	0	0	0	0	0	0	0	0	0	0	0	0	0	0	0	0	0	0	0	0
NR_133571.1	0.0289421	0.275879	0	0.24171	0.13489	0.0500965	0.0895942	0.0296806	0.0344727	0.307195	0.399953	0.0289098	0.122881	0.325485	0.14795	0.0621161	0.0513754	0.27877	0	0.0938869
NR_121615.1	0.185393	0.100485	0.103837	0	0.450771	0	0	0.289474	0.112291	0	0.145117	0	0.396318	0.271924	0	0	0.423138	0	0.451919	0
NR_125875.1	0	0	0	0	0	0	0	0	0	0	0	0	0	0	0	0	0	0	0	0
NR_125876.1	0	0	0	0	0	0	0	0	0	0	0	0	0	0	0	0	0	0	0	0
NR_003144.1	0.135828	0	0	0.222326	0.21844	0.258395	0.26284	0.16361	0	0.183296	0	0	0	0	0	0.146834	0.684399	0	0	0.161495
NR_037191.1	0	0.060444	0	0.120026	0	0.0242449	0.0892679	0	0.0337728	0.0751284	0.0436457	0	0	0.0817844	0	0.0306767	0	0.110576	0.161779	0
NR_033942.1	1.50143	2.27517	2.75014	3.94174	1.58859	3.1133	1.98665	3.12754	2.22656	0.640893	3.11204	3.22116	1.85007	1.17727	2.24492	0.996321	1.62454	1.1507	2.68216	1.81025
NR_026659.1	0.803597	0.843654	1.17463	1.04844	1.12525	0.599179	2.05842	0.64155	0.594494	2.29466	1.49654	0.697838	1.20969	2.14304	1.24801	0.664179	0.900792	1.68015	1.05512	0.464985
NR_133658.1	0	0	0	0.30664	0	0	0	0	0	0.275168	0.636904	0	0.2899	0	0	0.227149	0.191152	0	0.33057	0.277166
NR_002968.1	0	0	0	0	0	0	0	0	0	0	0	0	0	0	0	0	0	0	0	0
NR_002958.1	0	0	0	0	0	0	0	0	0	0	0	0	0	0	0	0	0	0	0	0
NR_003066.1	0	0	0	0	0	0	0	0	0	0	0	0	0	0	0	0	0	0	0	0
NR_002980.1	0	0	0	0	0	0	0	0	0	0	0	0	0	0	0	0	0	0	0	0
NR_002995.1	0	0	0	0	0	0	0	0	0	0	0	0	0	0	0	0	0	0	0	0
NR_002975.2	0	0	0	0	0	0	0	0	0	0	0	0	0	0	0	0	0	0	0	0
NR_002977.1	0	0	0	0	0	0	0	0	0	0	0	0	0	0	0	0	0	0	0	0
NR_131905.1	0	0.0754849	0	0	0	0	0	0	0	0	0	0	0.0330265	0.0687136	0	0	0	0	0	0
NR_023387.1	1.26238e-06	0	0	5.44369e-06	0	0	0	0	0	0	0	9.33919e-08	0	3.83909e-06	0	0	0	0	0	0
NR_002779.1	0.111236	0.361746	0.186907	0.239445	0.180309	0.048367	0.534251	0.11579	0.0673745	0.373801	0.261211	0.225661	0.396318	0.326309	0.214993	0.061198	0.101553	0	0.180767	0.120524
NR_133663.1	0	0.65561	0	0	0.316542	0.695448	0	0.0247428	0.473119	0.552351	0.512392	0.398645	1.13403	0.572854	0.503243	0.214873	0	0.390322	1.91526	0.213098
NR_073574.1	2.2817	4.03895	3.75169	4.10657	3.6506	3.1178	5.80407	1.12433	2.58915	6.41655	0.845108	1.76091	2.59933	1.36743	6.59134	3.79718	3.78864	6.36172	8.51775	2.0312
NR_073573.1	3.89081	2.23619	0.0049984	0.0547199	8.54961e-06	4.34003e-05	8.5848e-10	1.49182	0.00179893	0	3.04975	0.102251	1.16637	2.52743	0.0767122	0.00352716	8.95927e-06	6.84927e-07	2.62823e-06	9.93273e-08
NR_033322.3	3.80722	1.83059	2.13806	0	4.06005	3.46829	1.84017	2.38674	5.39705	1.49696	0.781024	3.40523	2.7366	1.61674	4.29698	3.04316	3.62072	1.43006	1.64685	4.37954
NR_033323.3	6.25232	10.61	4.41017	5.71702	6.16265	5.40793	4.2817	5.73562	6.32508	6.5727	3.45802	3.57513	5.41964	7.32599	6.07878	5.50279	5.17893	8.05763	4.65078	5.25673
NR_104013.1	3.97018	10.9936	3.7999	7.34792	3.94267	6.19412	10.8721	4.94489	3.29202	7.12895	5.85084	3.82745	7.94752	10.2227	3.44495	4.15103	4.17618	13.0971	5.16107	5.9777
NR_133674.1	0	0	0	0	1.67357	0	0	0	0	0	0	0	0	0	0	0	0	0	0	0
NR_037148.1	6.46273	15.789	5.04526	14.8742	7.65092	6.68615	12.0339	8.02155	5.70753	14.0621	18.7986	5.87411	17.1986	14.8945	8.96468	4.87363	8.02648	17.3251	13.6689	6.66849
NR_024151.1	0	0.48962	0.143279	0.0462747	0.101901	0.154528	0	0.219752	0	0	0	0.120502	0.113552	0.118221	0.131861	0.106714	0.104413	0	0	0.1828
NR_110898.1	0	0	0	0	0	0	0	0	0	0	0	0	0	0	0	0	0	0	0	0
NR_110897.1	0	0	0	0	0	0	0	0	0	0	0	0	0	0	0	0	0	0	0	0
NR_110911.1	0	0	0	0	0	0	0	0	0	0	0	0	0	0	0	0	0	0	0	0
NR_110914.1	0	0	0	0	0	0	0	0	0	0	0	0	0.215343	0.0750245	0	0	0	0	0	0
NR_027094.1	0	0	0	0	0	0	0	0	0	0	0	0	0	0	0	0	0	0	0	0
NR_037694.1	0	0	0	0	0	0	0	0	0	0	0	0	0	0	0	0	0	0	0	0
NR_077240.1	0.215029	0.28999	0.13133	0.308771	0.245202	0.203506	0.502917	0.280974	0.322126	0.536711	0.433701	0.287269	0.192376	0.514219	0.173662	0.258959	0.167406	0.518971	0.436055	0.225809
NR_077241.1	0	0	0	0	0	0	0	0	0	0	0	0	0	0	0	0	0	0	0	0
NR_104429.1	0.4985	0.446035	0.369689	0.734167	0	0.504195	1.13516	0.284571	0.277465	0.9311	0.704021	0.481421	0.496881	0.798235	0.624238	0.328205	0.512884	0.797827	0.517254	0.218446
NR_104479.1	0	0	0	0	0	0	0	0	0	0	0	0	0	0	0	0	0	0	0	0
NR_033754.2	1.28315	4.50628	1.43737	2.12039	1.04333	0.792209	2.49002	1.3839	0.471025	2.59687	3.21794	1.02546	3.26069	4.44849	0.956215	0.68249	1.52644	3.62415	1.23964	0.631953
NR_037573.1	1.21792	3.32248	1.14031	3.71784	3.74462	0.761546	7.96838	0.618746	0.786055	5.74769	9.46933	0.33899	3.38106	5.82829	4.83109	0.537358	1.8905	5.07866	4.46374	1.63628
NR_133907.1	0	0	0	0	0	0	0	0	0	0	0	0	0	0	0	0	0	0	0	0
NR_045681.1	0	0	0	0	0	0	0	0	0	0	0	0	0	0	0	0	0	0	0	0
NR_001278.1	0.0171679	0.233393	0.114237	0.402315	0.0588877	0.111264	0.312397	0.141194	0.0789665	0.343344	0.280433	0.0665222	0.134998	0.238121	0.222332	0.157764	0.143261	0.379896	0.550782	0.0966188
NR_023391.1	0	0.0614653	0.0249462	0.0427161	0.0360983	0	0.154673	0	0.0620619	0.17981	0.177033	0.11315	0.102126	0.27381	0.324385	0.092063	0.0335909	0.176652	0.0897913	0.0988599
NR_103761.1	0.0623825	0	0	0	0	0.0995319	0	0.0433344	0	0	0	0	0.0831424	0	0.178001	0	0.0601322	0	0.119987	0.124582
NR_024585.1	0.161223	0.638961	0.487631	0.910673	0.429065	0.427948	0.843856	0.253062	0.370468	1.20458	0.831585	0.330476	0.622285	0.956479	0.252359	0.30123	0.429443	1.03109	0.576696	0.318717
NR_111920.1	0.142044	0.274807	0.337117	0	0.0900661	0	0	0.277856	0.194992	0.126044	0	0	0.307374	0	0.387773	0	0	0	0	0
NR_134292.1	0	0	0	0	0	0	0	0	0	0	0	0	0	0	0	0	0	0	0	0
NR_134288.1	0	0	0	0	0	0	0	0	0	0	0	0	0	0	0	0	0	0	0	0
NM_001110822.1	0	0	0	0	0	0	0	0	0	0	0	0.00533968	0	0	0	0	0.0608702	0	0	0
NM_198285.2	0	0	0	0	0	0	0	0	0	0	0	0	0	0	0	0	0	0	0	0
NR_027398.1	0	0.568084	0	7.1048e-08	0	0	1.46535	0.680972	2.31675	2.82442	0.000351958	0	0.988192	0	0	0	0	1.93064	0	0
NR_026738.1	0	0.274578	7.62059e-10	0.089023	0	0.116666	0.223663	0.121796	0	0.338717	0.150613	3.34774e-05	0.193717	0.0985102	0	0.32315	0.44925	0.59701	0	0.094145
NR_026598.1	4.29473	1.20823	5.34872	0	10.3076	7.42869	3.99277	7.45242	5.58746	10.9558	3.70617	7.61751	6.13884	13.8639	3.4375	8.1716	7.52188	8.82096	6.26242	5.18213
NR_024330.1	0.41414	3.13172	0.710877	1.15853	0.300262	0.366614	0.96344	0.417793	0.919238	0.694139	1.11918	0.640885	2.01656	2.84537	0.844112	0.664859	0.723778	1.59438	1.2271	0.434825
NR_003545.1	7.14719	16.3753	6.69485	8.54608	9.2884	5.66455	11.5767	9.27587	4.14627	7.29274	14.2687	10.1113	11.1956	11.3742	3.4619	3.76436	11.1393	15.8194	6.55169	6.11685
NR_027404.1	3.29239	3.09736	5.298	4.88277	5.14051	8.07237	4.91587	5.72788	7.9731	4.07701	3.06221	6.19446	1.90604	3.66921	2.00144	5.06162	8.82405	2.6779	4.94201	7.80258
NR_004394.1	0	0	0	0	0	0	0	0	0	0	0	0	0	0	0	0	0	0	0	0
NR_024490.1	5.47278	19.0145	5.34315	14.434	6.97053	4.20707	16.0808	5.58404	2.23059	12.5493	17.9196	4.09825	18.5621	22.6041	4.83172	2.82334	7.15805	18.9271	5.88039	4.43059
NR_038923.1	2.7492	4.78959	2.36471	2.67715	3.02395	2.09194	3.06523	2.14632	1.48676	3.16749	4.68818	2.48984	3.28834	4.68044	1.64468	1.51251	2.0617	3.60218	1.5956	1.32981
NR_002955.1	0	0	0	0	0	0	0	0	0	0	0	0	0	0	0	0	0	0	0	0
NR_026556.1	0	0	0	0	0	0	0	0	0.00911246	0	0.0117763	0	0.0107205	0.0110334	0.00969266	0	0	0	0.0122245	0.00815051
NR_026781.1	0.690391	1.38087	0.861938	1.20882	0.65114	0.60974	0.914174	0.776333	0.390481	0.649339	1.06412	0.798452	0.906861	1.07882	0.376439	0.364278	0.863127	1.19306	0.539146	0.679693
NR_121622.1	0.0406834	0	0	0	0	0	0	0	0	0	0	0	0	0	0	0	0	0	0	0
NR_003551.1	0.255602	0.0554158	0.419271	0.293444	0.124296	0.489016	0.383255	0.478921	0.340596	0.206145	0.880328	0.311121	0.109282	0.262433	0.69163	0.410082	0.373365	0.506886	0.332301	0.470809
NR_002311.1	0	0	0	0	0	0	0	0	0	0	0	0	0	0	0	0	0	0	0	0
NR_024256.1	0	0	0	0	0	0	0	0	0	0	0	0	0	0	0	0	0	0.0455007	0	0
NR_003659.2	2.97202	5.30197	1.42497	3.11649	2.95243	2.23556	4.75997	1.24852	2.27894	3.73989	3.0828	1.97296	4.34489	4.87124	4.34606	2.81961	2.35133	5.57112	3.54663	1.84544
NR_004844.1	1.25833	0.560536	1.09009	0.490329	0.742422	0.794731	0.547465	0.867628	0.921726	0.993641	0.297418	1.35159	0.649228	0.781774	0.442338	0.629022	1.06133	0.301565	0.555424	0.987201
NR_037595.1	0.0527468	0	0	0	0	0	0	0.0549063	0	0	0	0.0535031	0.0751721	0	0	0.0580389	0.0481554	0	0	0
NR_002307.1	0	0	0	0	0	0	0	0	0	0	0	0	0.0336116	0	0	0	0.0215316	0	0	0
NR_002595.1	0.0690533	0.0748705	0.116045	0.0990889	0.167886	0.120105	0.055261	0	0	0.0463975	0	0.140131	0.0492237	0.0506448	0.0444817	0.151953	0.063044	0.136932	0	0.0373988
NM_001284262.1	0	0	0	0	0	0	0	0	0	0	0	0	0	0	0	0	0	0	0	0
NM_001301099.1	0	0	0	0	0	0	0.00126048	0	0.235135	1.56313e-09	0.00178399	0.10424	0.35263	0.486094	6.02398e-07	0	0.0611275	7.1503e-05	0.638711	0.208788
NM_145652.3	0	0	0	0	0	0	0	0	0.0740276	0	0	0	0	0	0	0	0	0	0	0
NM_001301098.1	0	0	0.119806	0	0	0.107349	0.0843534	0.392098	6.24507e-08	0.000123552	0.0616619	0.0766956	0.0291045	1.43004e-07	1.21545	0.832916	0.308988	0.778368	1.75634	0
NM_001284260.1	0	0	0	0	0	0	0	0	0	0	0	0	0	0	0	0	0	0	0	0
NM_001284261.1	0.0391605	0.0499129	0	0	0	0	0.125389	0	0	0	0	0	0	0	0	0	0	0	0	0.0848612
NR_073594.1	0.23876	0.31248	0	0	0	0.254549	0.403276	0.194138	0.324196	0	0.406395	0.685626	0	0.0734966	0.0668947	0	0	1.548e-06	3.80097e-07	0.1423
NR_104447.1	5.12919	6.45064	2.95593	2.04659	9.11565	4.04217	7.06494	4.30198	2.05995	4.85555	5.20546	6.22908	7.41804	2.5029	5.84538	6.37206	6.7253	10.1318	2.69832	6.41042
NR_103471.1	0.0130873	0.0485677	0	0.00660541	0	0	0	0	0	0	0	0	0	1.81413	0	0	0.00401078	0	0.00584053	0
NR_122126.1	0	0	0	0	0	0	0	0	0	0	0	0	0	0	0	0	0	0	0	0
NR_103528.1	9.5786e-06	0.183187	3.1377e-05	1.53998	0.00366539	0.000111599	0.00193025	8.60723e-05	2.00264	0.107126	0.0124449	0.00322587	0.0017404	5.34381e-06	0.00186522	7.56245e-05	0.000522727	2.22334e-07	0.00013602	0.000113697
NR_110128.1	0	2.12335	0	3.01998	0.80877	1.21353	1.77006	0.398042	0.917455	0.584907	2.61382	0.593489	1.38703	3.01249	2.87242	0.501882	0.580964	2.31556	2.89926	0.582529
NR_073391.1	0.595276	0.390118	0	0.849234	0.378286	0.129482	0.676392	0.395466	0.805813	0.352919	0.253794	0	0	0.333867	0	0	0.680671	1.52684	0	0
NR_073593.1	0.243249	1.8658e-05	0.243837	0	0	9.16122e-09	0.00280412	4.50801e-05	0.171915	0	0.000224344	0	0.599726	0.0242341	0.0223748	0	0.461581	0.384466	0.58671	0
NR_104443.1	0.0576294	0.844055	0.430392	0.66194	0	0.159945	0.465856	0.205017	0	0	0	0.660768	0.821251	0.61116	0.51996	0.0885099	0.624332	0.253206	0.511435	0.0890701
NR_122125.1	0	0	0	0	0	0	0	0	0	0	0	0	0	0	0	0	0	0	0	0
NR_104442.1	0	0.479135	0	0	0	0	0	0	0	0	0	0	0	0	0	0	0	1.2485e-09	0	0
NR_110322.1	0	0	0	0	0	0	0	0	0	0	0	0	0	0	0	0	0	0	0	0
NR_110191.1	1.21072	2.16947	1.83343	2.42609	0	0.537472	4.0793	2.1303	1.73127	5.63444	2.73624	1.15554	3.43139	3.74508	1.24299	1.70266	1.40694	3.40141	2.3803	0
NR_073591.1	0	0	0.116657	0	0	0	0	0	0	0.804239	0	0	0.181909	0.103427	0.196945	0	0	0.337433	0	0.154234
NR_103468.1	0	0	0	0	5.75389e-05	0.497367	0	0	0.48646	0	0	0	0.64165	0	0	0.000187752	3.21022e-06	0.645712	0.677871	0
NR_110126.1	0.314428	0	0.465278	0	0.157698	0	0	0	0	0	0	1.1041e-07	0	0	0	0.151852	0	0	0	0
NR_110834.1	0.00159341	5.63371	0.242954	3.27291	10.847	6.17139e-05	10.2557	0.00633139	1.78003	11.5769	13.808	3.75282e-05	3.60745	7.08852	7.20882	0.940438	3.97681	22.1941	10.7175	2.02218
NR_045830.1	8.11237e-08	2.33025e-07	5.35632e-08	0	0	2.39482e-08	3.29018e-07	0	0	0	7.21501e-08	1.11562e-08	0	1.57305e-07	3.76997e-08	1.09022e-07	2.55519e-07	8.39674e-07	7.51193e-08	0
NR_110192.1	0	0	1.08804	1.36583	0	0	0	0	2.33084	2.76149	2.72893	0	0	0	2.14012	0.897679	3.77908e-10	3.88793e-08	0	0
NR_073078.1	0	0	0	0	0	0	0	0	0	0	0	0	0	0	0	0	0	0	0	0
NR_103517.1	0	0.547782	0.157795	0	0.353549	0.0916655	0	0.167216	0	0.209968	0	0	0.266908	0.325562	0	0	0.122845	0	0	0
NR_073079.1	0.0414059	0.497558	0.139542	0.532914	0.134203	0.0722007	0.331605	0.129903	0.200441	0.222215	0.129834	0.25313	0.531893	0.243197	0.267414	0.0913213	0.113207	0.654715	0.202673	0.0449337
NR_130127.1	2.66445	2.62702	3.37713	0	4.5251	2.27237	0.826485	2.66251	1.56169	0.947666	0	2.20833	0.646386	2.2341	1.78239	0	3.01085	0	1.97008	0.69807
NR_110193.1	2.32519	3.49451	0.00181116	4.08512	10.4708	7.0964	3.44067	2.6716	0.978575	0.480384	2.84246	2.4569	5.67666	2.32547	4.79806	1.6875	1.83445	1.03895	0	5.61978
NR_111909.1	0	0	0	0	0	0	0	0	0	0	0	0	0	0	0	0	0	0	0	0
NR_103467.1	0	0	0	0.463776	0.268925	0	0	0.0288531	0	0	0	0	0	1.2225	0	0.0136397	0.485448	0	0.479181	0.00478552
NR_109848.1	0	0	0	0	0	0	0	0	0	0	0	0	0	0	0	0	0	0	0	0
NR_048552.1	0.000182374	1.49523	1.1837	0.0014156	0.228603	0.0477986	4.96951	8.79532e-05	0.000188834	0.0138896	3.5243	1.39143	1.27957	3.60913	1.81126	0.741127	1.52914	0.056347	0.0134634	5.6219
NR_110122.1	0.303052	0.00399995	0.00017936	3.16723e-05	0.899793	0	0	0	0.0123889	5.6338e-09	0	0.0540861	0	0.0428879	1.51379e-09	0.419378	2.44475e-10	0	0	0.922226
NR_120681.1	1.35408	8.66566	0	5.22473	0	5.66809	0	0.630495	0	3.70774	7.16242	0.192431	0	2.29662	0	1.49917	0.199102	0	5.3227	0
NR_126049.1	0.111528	0	0.192211	0	0.100879	0	0	0.215153	0.114886	0.0875638	0.149888	0.0764136	0	0	0.209481	0.205545	0.149167	0	0	0.082069
NR_026791.1	0	2.47556	0.136435	0.786534	0.0987136	0.132398	1.07245	0.126783	0.110657	0.818579	1.57306	0.0617715	2.43009	1.51848	0.980853	0.0670082	0.0277986	2.9588	0.742237	0.0329918
NR_102747.1	0.558012	3.2679	0.738441	2.66441	0.701006	0.436566	3.30232	0.904032	0.0218539	2.89645	3.84677	0.437229	2.6022	3.29522	3.24357	0.349973	0.48325	5.06692	5.36525	0.311671
NR_027406.1	3.42105	8.13819	5.06644	8.17529	3.22374	5.61101	7.0661	5.55179	5.52538	4.56656	9.32704	5.39235	8.48004	9.42383	7.27452	3.48615	4.78426	8.12616	7.03876	5.47683
NR_030211.1	0	0	0	0	0	0	0	0	0	0	0	0	0	0	0	0	0	0	0	0
NR_109882.1	0	0	0	0	0	0	0	0	0	0	0	0	0	0	0	0	0	0	0	0
NR_028375.2	0.993162	0.868924	0.857265	3.11809	2.55628	1.54092	7.03772	1.79333	1.4095	8.56433	3.98821	0.710488	0.826384	2.58806	2.20284	1.1596	0.979333	2.95057	2.87378	2.2161
NR_036157.1	0	0	0	0	0	0	0	0	0	0	0	0	0	0	0	0	0	0	0	0
NR_102271.1	0	0	0	0	0	0	0	0	0	0	0	0	0	0	0	0	0	0	0	0
NR_045211.1	0	0	0	0	0	0	0	0	0.0448407	0	0	0	0	0	0	0	0	0	0	0
NR_109986.1	0	0	0	0	0.0552322	0	0	0	0	0	0.0266714	0	0	0	0.0219522	0	0	0	0	0
NR_104329.1	0	0	0	0	0	0	0	0	0	0	0	0	0	0	0	0	0	0	0	0
NR_103779.1	0	0	0	0	0	0	0	0	0	0.00150425	0.0278265	0	0.0501342	0.0252453	0.0224223	0	0.0163406	0.0682046	0	0
NR_030335.1	0	0	0	0	0	0	0	0	0	0	0	0	0	0	0	0	0	0	0	0
NR_040005.1	0.0446979	0.145361	0.15021	0.128289	0.217361	0.116612	0.214679	0	0	0.180246	0.489826	0.0453389	0.191104	0.655606	0.0575939	0	0.0816143	0.265922	0.145276	0.193722
NR_030301.1	0	0	0	0	0	0	0	0	0	0	0	0	0	0	0	0	0	0	0	0
NR_102369.1	0	0	0	0	0	0	0	0	0	0	0	0	0	0	0	0	0	0	0	0
NR_030326.1	0	0	0	0	0	0	0	0	0	0	0	0	0	0	0	0	0	0	0	0
NR_125849.1	0	0	0	0	0	0	0.0478494	0	0	0	0	0	0	0	0	0	0	0	0	0
NR_027765.2	0	0	0	0	0	0	0	0	0.00917638	0	0	0	0.0107932	0	0	0	0	0.015036	0	0
NR_033947.1	0	1.76409	0.477621	0.399079	0.170672	1.10543	2.98895	1.94001	1.42682	0.233879	1.54041	1.26332	1.7108	1.05555	0.577305	1.36416e-08	1.08127	0.553154	4.41773	1.05091
NR_110288.1	0	0	0	0	0.188917	0	0	0.121318	0	0	0	0	0	0	0	0	0	0	0	0
NR_104139.1	0	0	0	0	0	0	0	0	0	0	0	0	0	0	0	0	0	0	0	0
NR_030232.1	0	0	0	0	0	0	0	0	0	0	0	0	0	0	0	0	0	0	0	0
NR_031716.1	0	0	0	0	0	0	0	0	0	0	0	0	0	0	0	0	0	0	0	0
NR_027249.1	0.297364	0.447495	0.19427	0.373807	0.303014	0.221686	0.431203	0.316815	0.285802	0.288525	0.395254	0.350645	0.572071	0.369659	0.308784	0.18086	0.377214	0.5718	0.29717	0.194708
NR_038080.1	0.263201	4.47589	0.405397	2.64396	0.506633	0.486386	2.71259	0.346993	0.219201	2.4544	3.83716	0.489721	3.68067	3.99661	2.41636	0.506814	0.300363	5.51314	2.35248	0.213885
NR_030372.1	0	0	0	0	0	0	0	0	0	0	0	0	0	0	0	0	0	0	0	0
NR_030378.1	0	0	0	0	0	0	0	0	0	0	0	0	0	0	0	0	0	0	0	0
NR_046901.1	0	0	0	0	0	0	0	0	0.24783	0.484127	0	0.193681	0	0	0	0	0.386101	0.404275	0.767041	0
NR_122107.1	0	0	0	0	0	0	0	0	0	0	0	0	0	0	0	0	0	0	0	0
NR_027284.1	3.23301	4.52313	2.11875	2.83481	2.30546	2.08373	1.87191	3.09296	1.57327	1.36823	3.42114	2.73072	3.72767	2.68891	1.98025	1.35844	3.3801	3.51451	1.79616	1.89048
NR_003267.1	0	0	0	0	0	0	0	0	0	0	0	0	0	0	0	0	0	0	0	0
NR_030231.1	0	0	0	0	0	0	0	0	0	0	0	0	0	0	0	0	0	0	0	0
NR_031665.1	0	0	0	0	0	0	0	0	0	0	0	0	0	0	0	0	0	0	0	0
NR_130785.1	0	0	0	0	0	0	0	0	0	0	0	0	0	0	0	0	0	0	0	0
NR_036687.1	0	0	0	0	0	0	0	0	0	0	0	0	0	0	0	0	0	0	0	0
NR_031613.1	0	0	0	0	0	0	0	0	0	0	0	0	0	0	0	0	0	0	0	0
NR_029407.1	3.57786	7.38944	4.39312	3.99948	3.34005	3.37997	5.90164	3.9511	2.67702	3.80961	3.75867	3.17116	7.52423	8.10677	3.53101	2.57512	3.68145	5.94765	3.04016	3.33283
NR_030345.1	0	0	0	0	0	0	0	0	0	0	0	0	0	0	0	0	0	0	0	0
NR_038390.1	0.0187529	0.0203287	0	0.0807375	0.0303977	0	0.0600937	0	0.045488	0.0252075	0.0587165	0.0381413	0.0803569	0.0275063	0.0242207	0	0	0.149094	0.121903	0.0203189
NR_125770.1	0	0	0	0	0	0	0	0	0	0	0	0	0	0	0	0	0	0	0	0
NR_125730.1	0	0	0	0	0	0	0	0	0	0	0	0	0	0	0	0	0	0	0	0
NR_037882.1	3.94999e-09	0.801929	0.407406	0.595412	0	0.598022	0.238479	0	0.2336	0	0.274793	0.231479	0.731144	0.985669	0.246748	0	0.752602	1.1126	2.10992	0.308088
NR_102748.1	0.975083	1.9855	0.66035	0.000155384	0.249373	0.673287	0.780008	1.08139e-09	1.08843	1.31718	1.67708e-06	1.40303	2.86517	3.36056	2.94026	1.65136	1.13714	0	1.2091	1.2728
NR_027237.1	1.21653	2.17204	1.52306	1.76633	1.69355	1.3193	1.30604	1.66858	0.936221	1.59675	2.30779	1.33559	1.71334	1.99426	1.27245	0.850393	1.77701	2.27059	1.04663	1.39565
NR_105018.1	0.116885	0.650817	0.123319	0.393826	0.165106	0.298402	0.407118	0.242016	0.13292	1.20464	0.830588	0.0988229	0.254405	0.592112	0.249176	0.231935	0.158672	0.631752	0.644702	0.0913196
NR_031589.1	0	0	0	0	0	0	0	0	0	0	0	0	0	0	0	0	0	0	0	0
NR_040096.1	0.629936	1.0243	0	0.225999	0	0	0.252126	0	0	0.423373	0.493087	0.319485	0.897754	0.461979	0.405841	0	0.143776	0.312307	0.511851	0
NR_027074.1	0	0	0	0	0	0	0	0	0	0	0	0	0	0	0	0	0	0	0	0
NR_126408.1	0	0	0	0	0	0	0	0	0	0	0	0	0	0	0	0	0	0	0	0
NR_030287.1	0	0	0	0	0	0	0	0	0	0	0	0	0	0	0	0	0	0	0	0
NR_111948.1	0	0	0	0	0	0	0	0	0	0	0	0	0	0	0	0	0	0	0	0
NR_030333.1	0	0	0	0	0	0	0	0	0	0	0	0	0	0	0	0	0	0	0	0
NR_038441.1	0	0	0	0	0	0	0	0	0	0	0	0	0	0	0	0.0687716	0	0	0	0
NR_103840.1	0	0	0	0	0	0	0	0	0	0	0	0	0	0	0	0	0	0	0	0
NR_126378.1	1.703	2.45299	1.28771	1.79433	1.47379	3.08732	1.0763	2.91288	2.0581	0.993204	0.645654	1.48504	2.20284	1.3464	1.23146	2.29301	2.03209	0	3.71405	3.11852
NR_102270.1	0	0	0	0	0	0	0	0	0	0	0	0	0	0	0	0	0	0	0	0
NR_036686.1	0	0	0	0	0	0	0	0	0	0	0	0	0	0	0	0	0	0	0	0
NR_024389.1	0.00597715	0	0	0.00857759	0	0	0.00956919	0	0	0.00803435	0.0374293	0	0	0	0.00770165	0	0	0	0.00971339	0
NR_024594.1	0	0.146929	0.0507777	0.0978303	0.14921	0.0398115	0.166238	0.0244631	0.195276	0.278936	0.0719181	0.158496	0.296831	0.266025	0.135699	0.0499264	0.0856002	0.135078	0.110686	0.0247471
NR_103538.1	0.0932868	0	0.208997	0	0.151214	0.16225	0	0	0	0	0	0	0.53179	0.136828	0.120201	0	0	0	0.151599	0
NR_134558.1	0.0513531	0	0.0829633	0.0471282	0.0809897	0.167663	0.178649	0.102432	0	0	0	0	0.250607	0.368172	0	0	0.199918	0.334687	0.121075	0
NR_046798.1	0	0	0	0	0	0	0	0	0	0	0	0	0	0	0	0	0	0	0	0
NR_027378.1	0.110544	0.126881	0.0946938	0.161689	0.115945	0.141372	0.0832832	0.130988	0.127431	0.113628	0.0916192	0.0725543	0.139008	0.143065	0.108923	0.0715501	0.142478	0.141849	0.194839	0.106935
NR_015384.2	0.144283	0.514757	0.110767	0.638988	0.203997	0.178462	0.251404	0.0989063	0.102034	0.399445	0.316472	0.0959758	0.524763	0.569364	0.162043	0.140401	0.0849869	0.167102	0.171909	0.0261669
NR_120433.1	0	0	0	0	0	0	0	0	0	0	0	0	0	0	0	0	0	0	0	0
NR_120513.1	0.163639	0.530763	0.493462	0.48467	0.324621	0.383144	1.33174	0.590928	0.436675	1.21383	1.14594	0.456753	0.79914	0.826866	0.264809	0.352572	0.329098	1.42972	0.848543	0.347181
NR_122110.1	0	0.151756	0.0896111	0.0573999	0.0324178	0.121743	0	0.10409	0	0	0.0626178	0.0811436	0	0	0	0	0.0547748	0.118981	0	0.130015
NR_125417.1	0	0.181793	0	0	0	0	0.157472	0.0889539	0	0	0.1795	0.170107	0.239001	0.245977	0	0.184528	0	0.0434274	0.272531	0.37007
NR_125760.1	0	0	0	0	0	0	0	0	0	0	0	0	0	0	0	0	0	0	0	0
NR_125819.1	0.00887688	0.0187656	0.0290159	0.0384938	0.0427051	0.0374042	0.111793	0.00904506	0.0211595	0.110009	0.0408111	0.00889445	0.0496967	0.0387997	0.0672151	0.0568222	0.0239358	0.0350794	0.0716056	0.00931341
NR_125945.1	0.0725051	0.235791	0.0812193	0.104049	0.235056	0.126105	0.116078	0.150947	0.175663	0.194919	0.227015	0	0.206661	0.31904	0.373695	0.159559	0.264775	0.28757	0	0.157119
NR_126391.1	0	0	0	0	0	0	0	0	0	0	0	0	0	0	0	0	0	0	0	0
NR_126402.1	0	0	0	0	0	0	0	0	0	0	0	0	0	0	0	0	0	0	0	0
NR_126405.1	0	0	0	0	0	0	0	0	0	0	0	0	0	0	0	0	0	0	0	0
NR_126414.1	0	0	0	0	0	0	0	0	0	0	0	0	0	0	0	0	0	0	0	0
NR_130736.1	0	0	0	0.0725173	0	0	0	0.0263007	0	0.0339623	0	0	0	0	0	0	0	0	0	0
NR_130776.1	0.44677	0	0	0	0	0	0.0987231	0	0.305896	0	0	0	0	0	0	0	0.230537	0	0	0
NR_130929.1	0.0183174	0.0861402	0.0656394	0.119393	0	0.0779517	0.0719594	0.047686	0.0681066	0.125336	0.0909275	0.0209351	0.144918	0.110766	0.0982876	0.0423114	0.0212896	0.0886407	0.112735	0.0835692
NR_002768.2	0.14161	0.74208	0.216762	1.54329	0.250198	0.134383	1.75477	0.161223	0.0465554	1.45945	1.62586	0.143266	0.984626	1.8514	0.332636	0.113405	0.176395	1.31671	0.294348	0.0701834
NR_133925.1	0.903036	0.369157	1.98085	1.72544	0.601509	0.321051	0.521186	0.361675	4.73619e-06	1.73177	0.548739	0.361813	1.38255	0.922034	0.407265	0.392248	0.540963	1.08636e-07	1.34963	0.407528
NR_133934.1	1.16763	1.86707	1.22005	1.0997	2.16921	0.875537	1.71062	1.65344	2.35348	1.26011	1.04787	1.37238	2.78296	0.489589	1.35611	0.798597	0.83505	5.09922	0.681737	1.6101
NR_133935.1	0.928213	1.18286	0	0	0	1.17529	0	0	0	0	0.450931	0.801958	0.987035	1.65077	0.709771	0	0.814602	0.700222	1.0045	0.304
NR_133937.1	0.427876	0	0	0	0	0	0	0	0	0	0	0	0	0	0	0	0	0	0	0
NR_133936.1	0.794421	2.03461	1.40929	0.578628	1.06482	0.821841	1.11304	1.73052	1.64604	0.671546	1.21835	0.986063	2.03427	0.659502	1.0632	0.771862	0.586931	0.923904	0.497558	0.850292
NR_134284.1	1.23284	1.16678	1.01994	0.497041	1.92491	1.42223	0.936465	1.35641	0.271933	1.27238	1.32917	2.14848	0.618583	0.86863	0.638338	1.04727	1.47069	2.03398	1.07373	0.478525
NR_134285.1	0	0	0	0	0	0	0	0.112383	0	0	0.0192521	0	0	0	0	0.274956	0	0	0	0
NR_024019.3	0.262758	0.95082	0.219805	0.331358	0	0.0994203	0.373739	0.206137	0.310962	0.190504	0.252385	0.145406	0.943859	1.09203	1.12658	0.113104	0.182527	1.37357	0	0.0869206
NR_134316.1	0	0.693711	0.358047	0	0	0.291313	0.790769	0	1.21223	0	0	0	0	0	0.786629	0	0	0	0.502777	0
NR_134531.1	0	0	0	0	0	0	0	0	0	0	0	0	0	0	0	0	0	0	0	0
NR_134532.1	0	0	0	0	0	0	0	0	0	0	0	0	0	0	0	0	0	0	0	0
NR_134533.1	0	0	0	0	0	0	0	0	0	0	0	0	0	0	0	0	0	0	0	0
NR_134654.1	0.390756	3.89395	0.302365	1.93417	0.378708	0.272562	1.89894	0.114693	0.174709	2.1984	3.31981	0.191841	4.24944	4.06635	2.11494	0.514113	0.262822	5.3755	2.26839	0.0973561
NR_134652.1	0.564844	0.906094	0.483586	1.12235	1.25464	0.759914	1.20322	1.10877	0.125714	1.50166	1.02943	0.482489	1.21262	1.1302	0.623932	0.290761	0.642419	1.18331	0.0796265	0.605697
NR_134656.1	0	0	0	0	0	0	0	0	0	0	0	0	0	0	0	0	0	0	0	0
NR_026749.2	0	0	0	0	0	0	0	0	0	0	0	0	0	0	0	0	0	0	0	0
NR_045117.1	0	0	0	0	0	0	0	0	0	0	0	0	0	0	0	0	0	0	0	0
NR_033399.1	2.2781	8.43814	3.41277	7.11865	2.37611	3.52742	5.64059	2.32892	3.44077	4.96204	5.72284	2.89225	7.41706	9.36422	7.89759	3.7257	1.8331	8.02967	7.36409	3.13883
NR_051985.1	0	0	0	0	0	0	0	0	0	0	0	0	0.0723127	0	0	0.0102252	0	0	0	0
NR_134639.1	0.587396	0.627889	0.32631	0.296494	0	0.223611	0.798975	0.949604	0.258789	0.627752	0	0	0.601801	0	0.0109707	0	0.501067	0	0	0.450481
NR_134852.1	0	0.0835123	1.04826e-08	0	0	0	0.123337	0	0	0.0136091	0.040202	0	0	0.11215	0.0330887	0.0282562	0.0937778	0	0.0417318	0.0278242
NR_046447.1	0	0	0	0.0365741	0	0	0	0	0	0	0	0	0	0	0	0.0841295	0	0	0	0
NR_046445.1	0	0	0	0	0	0	0	0	0	0	0	0	0	0	0	0	0	0	0	0
NR_046448.1	0	0	0	0	0	0	0	0	0	0	0	0	0	0	0	0	0	0	0	0
NR_046450.1	0	0	0	0	0	0	0	0	0	0	0	0	0	0	0	0	0.0251969	0	0	0
NR_046451.1	0	0	0.0325307	0	0	0	0	0	0.035179	0	0	0	0	0	0.0374189	0	0	0	0	0
NR_046449.2	0	0	0	0	0	0	0	0	0	0.0703939	0	0	0	0	0	0	0	0.155781	0	0.0567427
NR_027024.1	0	0	0	0	0	0	0	0	0	0	0	0	0	0	0	0	0	0	0	0
NR_036506.1	0.135192	1.31795	0.756795	0.774131	1.53189	0.70557	0.864497	0.982811	0.327325	0.544141	2.1101	0.95986	1.34573	0.396438	0.174115	0.148715	0.739555	0.80212	1.096	0.585207
NR_073206.1	0	0	0	0	0	0	0	0	0	0	0	0	0	0	0	0	0	0	0	0
NR_073207.1	0	0	0	0	0	0	0	0	0	0	0	0	0	0	0	0	0	0	0	0
NR_003133.2	0	0	0	0	0	0	0	0	0	0	0	0	0	0	0	0	0	0	0	0
NR_002454.2	0	0.17511	0	0.463631	0.0597017	0.381413	0.258614	0	0	0	0	0.163853	0.920858	0	0	0	0.147476	0.783075	0	0
NR_036447.1	1.88024	6.08634	2.23438	5.80928	1.51742	3.50329	4.21162	2.77613	3.0848	2.56835	4.8721	1.11431	6.5383	5.42213	5.84188	1.93663	1.52233	4.1877	5.44831	2.45697
NR_028597.1	0.0252043	0.0552323	0	0	0	0	0	0.0265062	0.0303795	0	0	0	0.0367799	0	0	0.0281237	0.0456272	0	0	0
NR_040718.1	9.1813	6.32146	7.64152	3.32705	11.3729	8.08094	6.51149	7.26968	12.5583	12.8873	4.42271	7.22976	7.2518	6.6442	9.38769	9.98084	12.4619	9.19522	9.53132	11.3376
NR_003569.1	0	0	0	0	0	0	0	0	0	0	0	0	0	0	0	0	0	0	0	0
NR_132758.2	0	0	0	0	0	0	0	0	0	0	0	0	0	0	0	0	0	0	0	0
NR_132759.2	0	0	0	0	0	0	0	0	0	0	0	0	0	0	0	0	0	0	0	0
NR_132760.2	0	0	0	0	0	0	0	0	0	0	0	0	0	0	0	0	0	0	0	0
NR_135095.1	0.00311699	0	0.00620165	0.00491826	0	0.0024409	0	0.00255194	0	0	0.0184821	0.00251714	0.004198	0	0	0.00314386	0.0029976	0.0135416	0.00418615	0
NR_024035.2	0.0141982	0	0.0325919	0.0199296	0	0.0126173	0	0.015473	0	0	0.089948	0.0150471	0.0204791	0	0	0.015909	0.0128102	0.0551328	0.0239536	0
NR_002774.3	0.115081	0.573226	0.108907	0.536619	0.175295	0.0970779	0.509653	0.137333	0.0265408	0.478529	0.666261	0.119631	0.600625	0.574602	0.327752	0.068006	0.114261	0.488345	0.336388	0.128815
NR_135073.1	0.0454404	0.298226	0.227545	0.0518089	0.219396	0.0809207	0.43706	0.371706	0.179185	0.386569	0.45096	0.241389	0.677382	0.370626	0.378745	0	0.175233	0.730664	0.267503	0.182243
NR_040068.1	0	0	0	0	0	0	0	0	0	0	0	0	0	0	0	0	0	0.298822	0	0
NR_040066.1	0	0	0	0	0	0	0	0	0	0	0	0	0	0	0	0	0	0	0	0
NR_134608.1	2.37836	10.5116	5.91098	6.51703	10.4646	4.38073	5.59133	6.71895	3.94701	3.88747	5.92147	4.91169	7.01324	7.48372	5.84675	3.20944	6.63969	8.64571	2.4113	0.980727
NR_134677.1	0.0282202	0	0	0	0	0	0	0.091974	0.197559	0	0.680703	0	0	0	0	1.42411e-08	0.360467	0	0	0
NR_135082.1	5.50435	6.49842	4.74238	5.22635	5.28538	4.43197	4.04163	2.98794	0	7.16366	2.75625	5.3991	5.56062	6.68728	3.83853	1.10487	7.58467	5.96988	3.66511	2.55016
NR_135104.1	0.958757	6.15932	2.16488	2.87425	1.30554	0	5.69954	1.24238	1.81411	3.79858	1.92044	1.3064e-07	4.02586	4.7688	2.7715	1.04737	1.3362	10.5498	5.78492	0.842542
NR_135105.1	3.38731	7.29721	2.36701	8.22798	2.86448	2.32288e-06	6.38069	1.93726	1.37537	8.38096	3.63543	1.39334	4.28275	4.90954	5.78592	1.2705	5.38544	10.4627	5.67626	3.66231
NR_135128.1	0.0355405	0.0267926	0.0432661	0.033891	0.0594462	0	0.151408	0.0125176	0.0484052	0.048996	0.036203	0.0137675	0.121361	0.120488	0.0481113	0.0439997	0.0110011	0.0239648	0.0193372	0.0512049
NR_003521.1	0.870596	3.17611	1.05685	2.16722	0.9407	0.823165	1.85622	1.31944	1.15987	1.70143	2.23132	0.707118	2.70189	2.6237	2.03457	0.722557	1.22599	3.46254	1.93206	1.21223
NR_003561.2	0.297462	1.19283	0.471617	1.01904	0.136731	0.358234	1.48577	0.29725	0.354653	0.892714	1.43559	0.342715	1.51391	1.13251	1.2091	0.507489	0.19805	1.53342	1.01513	0.424571
NR_027768.1	0	0	0	0	0	0.0689791	0	0	0	0	0	0.0674253	0	0.194996	0	0	0.121372	0	0	0
NR_023382.1	0.937075	0.720426	1.00534	1.15361	1.37695	1.03826	1.35156	1.26591	1.12822	0.642249	1.24931	1.30851	1.04384	0.828767	1.18193	0.897549	1.26956	0.6733	1.0189	1.16222
NR_038243.2	0.271642	0.588932	0.152145	0.487278	0.11008	0.0590571	0.108722	0.282763	0.0822656	0.0912836	0.637888	0.137769	0.38713	0.896468	0.175007	0.448344	0.247997	0.269347	0.441441	0.220744
NR_135121.1	0	0	0	0	0	0	0	0	0.0995611	0	0.399665	0.135127	0	0	0	0	0.0838821	0	0	0
NR_047593.2	0	0.084564	0	0.0426513	0.0751286	0	0.0596384	0	0	0.0609699	0.0474832	0	0.149542	0.222584	0.128664	0	0	0	0.053639	0
NR_132338.1	0	0	0	0	0	0	0	0	0	0	0	0	0	0	0	0	0	0	0	0
NR_131766.1	1.35478	1.90332	0.751097	0.367068	0.898749	0.57412	3.4205	1.16209	0.79324	0.551139	2.13962	0	0	1.81409	1.00119	0.600061	1.18941	1.23931	2.34335	3.6458
NR_104256.1	0.914545	0.342186	0.434418	0.311611	0.520639	0.765468	0.50103	0.675068	0.31255	0.436257	0.319316	0.156784	0.403148	0.558542	0.138513	0.250977	0.910563	0	0.570771	0.363156
NR_126534.1	0.187315	0.321747	0.295762	0.410032	0.220651	0.404577	0.244327	0.336116	0.277417	0.175712	0.429857	0.504974	0.236779	0.253116	0.372777	0.256104	0.220402	0.237997	0.355867	0.21705
NR_134477.1	0.094875	0.0291723	0	0	0.072246	0.0780918	0.0746628	0	0.0196365	0.0824218	0	0	0.121989	0.0549299	0.0461067	0.0170362	0.015506	0.030196	0.0249928	0.0164631
NR_038099.1	0	0.0432981	0	0	0	0	0	0	0	0	0	0	0	0	0	0	0	0	0	0
NR_037141.1	0	0.595495	0	0.197043	0.189506	0	0.219822	0	0	0.369128	0.180051	0	0	0	0	0	0	0.272293	0	0
NR_135153.1	0.0881203	1.77393e-09	0.341604	7.36109e-10	2.40658e-08	0.0249267	0.226421	1.59171e-10	1.56543	7.07532e-07	2.06979e-10	7.09331e-10	0	0	1.10998	0.399215	0.89712	1.01895e-06	0.544647	1.43639e-08
NR_027490.1	0	0	0	0	0	0	0	0	0	0.308283	0	0	0	0	0	0	0	0	0	0
NR_109773.1	0.253893	0.273546	0.133085	0.121835	0.170435	0.119364	0.255805	0.172581	0.0350019	0.18396	0.481721	0.0503454	0.403937	0.0852006	0.19871	0.153311	0.235358	0.626653	0.254633	0.159966
NR_104247.1	0.33154	1.17624	0.254801	1.33251	0.622072	0.532532	0.823669	0.201485	0.164129	0.945446	1.17943	0.132656	0.630908	0.663632	1.26629	1.05453	0.338498	0.870701	1.61096	0.309992
NR_104238.1	2.39633	0.24556	1.58986	5.56695e-08	10.682	4.95488	1.09766	8.72569	5.41636	4.78477	5.03707	0.922191	6.13901	4.75662	3.44791	3.13609	2.7724	5.49367	8.59183	0.0149074
NR_104248.1	1.49679	2.10155	1.73056	2.41267	1.68174	1.97663	2.63725	2.77795	3.24919	2.78855	1.81258	2.52119	2.06885	2.55397	3.76453	2.08389	2.36237	0.618227	4.95032	1.68494
NR_104235.1	1.36327	2.37335	2.53814	1.29623	2.53906	2.32157	1.85962	2.04083	2.02514	1.75109	2.82179	2.49237	2.68277	2.01153	1.41769	1.81948	1.44314	1.79789	3.17929	2.92464
NR_033801.1	0	0	0.0719273	0.0210682	0.0479313	0.0138153	0.0484373	0	0	0.125631	0.0932896	0	0.0419113	0.0227216	0.0566909	0	0.0269881	0.090607	0	0
NR_002594.1	0.570909	1.82325	1.11937	2.36887	2.01083	0.98163	6.17066	0.846874	0.40838	7.36033	2.96945	0.803451	2.00246	4.01296	1.08868	0.457007	1.90466	3.97998	1.26171	1.06584
NR_002314.3	0	0	0	0	0	0	0	0	0	0	0	0	0	0	0	0	0	0	0	0
NR_135169.1	0.0521573	0.0912735	0.0870665	0.0952552	0.0711399	0.0663381	0.111199	0.0463096	0.0727124	0.12994	0.128121	0.0777052	0.110268	0.131554	0.0968251	0.0692352	0.0601259	0.174767	0.0918827	0.0609972
NR_134516.1	0	0	0	0	0	0	0	0	0	0	0	0	0	0	0	0	0	0	0	0
NR_034089.1	0.477699	1.3091	0.798146	1.36427	0.394563	0.738777	1.56842	0.668486	0.852974	1.50479	1.29692	0.615703	1.26024	1.25367	1.76482	0.820665	0.660072	1.89382	1.68078	0.626591
NR_002913.1	0	0	0	0	0	0	0	0	0	0	0	0	0	0	0	0	0	0	0	0
NR_132753.1	0	0	0	0	0	0	0	0	0	0	0	0	0	0	0	0	0	0	0	0
NR_002963.1	0	0	0	0	0	0	0	0	0	0	0	0	0	0	0	0	0	0	0	0
NR_003021.2	0	0	0	0	0	0	0	0	0	0	0	0	0	0	0	0	0	0	0	0
NR_002966.1	0	0	0	0	0	0	0	0	0	0	0	0	0	0	0	0	0	0	0	0
NR_033768.1	0	0	0	0	0	0	0	0	0	0	0	0	0	0	0	0	0	0	0	0
NR_033907.2	0.395423	1.61019	0.487386	0.91077	1.12225	0.514625	2.1743	0.593162	1.76304	2.166	2.72837	1.39651	1.32352	2.19687	1.62399	0.375842	0.878524	2.19523	1.54919	0.378013
NR_003019.1	0	0	0	0	0	0	0	0	0	0	0	0	0	0	0	0	0	0	0	0
NR_121212.1	0	0	0	0	0	0	0	0	0	0	0	0	0	0	0	0	0	0	0	0
NR_125889.1	0	0	0	0	0	0	0	0	0	0	0	0	0	0	0	0	0	0	0	0
NR_135201.1	0	0	0	0	0	0	0	0.0263159	0	0	0	0	0	0	0	0	0	0	0	0
NR_027003.1	1.26954	0	0.362792	0	0.214018	1.10638	0	0.765325	0.028779	0.0721305	0	0.852253	0	0	0.274612	0.206884	0.404756	0	0.675777	0.582173
NR_003563.1	0.877168	3.5739	0.764366	2.51284	0.997879	1.30043	2.66005	1.11548	1.18778	1.80355	2.37621	1.25669	3.03211	3.08756	2.61794	0.78564	1.30194	5.48106	3.022	1.44295
NR_135254.1	0	0	0	0	0	0	0	0	0	0	0	0	0	0	0	0	0	0	0	0
NR_003700.1	6.3653	8.2439	5.64507	8.35344	4.53119	8.40588	7.15737	6.37645	8.38138	6.42655	5.84578	6.21289	7.99324	8.15458	9.16277	6.56442	6.98183	6.3284	7.35496	6.19598
NR_135280.1	0	0	0	0	0	0	0.0226184	0	0	0	0	0	0	0	0	0	0	0	0	0
NR_135288.1	0	0	0	0	0	0	0	0	0.017153	0	0	0	0.0201799	0.020769	0	0	0	0	0	0
NR_135291.1	0.0318854	0	0	0	0.0258425	0.0554571	0.0255236	0.0497862	0	0.0214298	0	0.0323426	0.113604	0.0935357	0	0	0.014555	0	0	0.051822
NR_135300.1	0	0	0	0	0	0	0	0	0	0	0	0	0	0	0	0	0	0	0	0
NR_029408.1	5.42124	12.4624	8.43362	14.5102	13.4726	4.79727	12.5135	7.33175	3.4037	11.3453	12.2209	5.31034	14.3651	15.6037	4.55159	4.05514	9.44424	12.7603	6.85458	6.537
NR_110253.1	0	4.0431e-09	0.48969	0	1.25648	0	0.757073	0	6.38777e-10	0	0	0	0	0	0	0	0	2.34604	0	0
NR_110254.1	0	0	0	0	0	0	0	0.338757	0	0	1.52755e-09	0	0	0	1.68417e-06	0	0.401531	0	0	0
NR_135321.1	0	0	0	0	0	0	0	0	0.0161144	0	0.0104126	0	0	0	0	0	0	0	0.0108088	0
NR_135275.1	0.00114021	0.355676	0	0.00303914	1.55192e-08	0	0.00193615	1.17054e-08	0	3.0188e-06	7.62363e-08	0	0	0	0.000121952	0.00464654	0.00242084	0.558223	4.11432e-05	2.56796e-10
NR_024010.1	0	0	0	0	0	0	0	0	0	0	0	0	0	0	0	0	0	0	0	0
NR_031764.1	0	0	0	0	0	0	0	0.0299743	0	0	0	0.0286796	0	0	0	0	0	0	0	0.0624159
NR_102299.1	0	8.00102e-10	0	1.01546	0.451212	0.392407	0	0.243959	0	0	0.00163442	0	0	0	0.000668488	4.64607e-06	0.000513201	4.10335e-09	0	0
NR_135296.1	9.62987e-05	0.941563	0.603497	1.55382	6.71066	0.825806	5.19417	2.00549e-07	0.00293962	13.4914	1.55682	1.97858e-05	2.99569	5.70202	5.18918	0.196284	8.12085	9.64339	11.0319	5.5013
NR_135323.1	0.424532	0.666208	0.76998	2.00125	0.753628	0.300373	0.366502	0.631996	0.298038	0.609704	0.90382	1.02467	1.20134	1.40187	0.308411	0	0.681901	1.06647	0.222339	0.641578
NR_047672.1	0	0	0	0	0	0	0	0	0	0	0	0	0	0	0	0	0	0	0	0
NR_135470.1	0.5605	0.725237	0.282728	0.296399	0	0.642363	0.963094	0	0.281527	0.294159	1.04657	0	0	0.322866	0.674913	0.754969	0.33863	1.14497	0.405788	0
NR_135471.1	1.46219	1.08053	2.39866	0.438076	0	0	0.0376387	0.504144	1.25995	2.28497	0	0.487291	1.08688	1.13204	0	0.331604	3.09182e-07	4.10405e-08	1.67936	0.767758
NR_135481.1	0	0	0	0	0	0	0	0	0	0	0	0	0	0	0.125532	0	0	0	0	0
NR_001573.2	0	0	0	0	0	0	0	0	0	0	0	0	0	0	0	0	0	0	0	0
NR_024602.1	0	0	0	0	0	0	0	0	0	0	0	0	0	0	0	0	0	0	0	0
NR_003539.1	0	0	0	0	0	0	0	0	0	0	0	0	0	0	0	0	0	0	0	0
NR_002712.1	0	0	0	0	0	0	0	0	0.0287087	0	0	0	0	0	0	0	0.0432723	0	0	0.0256781
NR_135492.1	2.73662	0	6.6418	0	1.58874	3.05784	6.38152	2.46312	1.27159	0	2.08439	3.36502	4.58052	0	8.41025	4.33727	6.108	4.70912	6.61818	4.00151
NR_135601.1	0	0	0	0	6.86687e-05	0	0	0	0	0	0	0	0	0	0	9.28561e-09	0	0	0	0
NR_135607.1	0.795025	3.04785	5.59627	2.10061	0.664428	0.0265282	5.60697	1.58101	0.700559	3.62813	0.127487	0.202788	0.00225936	1.41015e-09	0.0506873	4.36396	1.99099	3.1368	1.48479	4.62375
NM_001321163.1	0	0	0	0	6.3028e-06	0	0	7.73455e-10	0	0	5.94347e-07	0	0	0	0	0	0	0	0	0
NR_135605.1	0	4.74742e-06	0	0	4.27535e-05	0	0	0.213497	0	0	5.71388e-09	0	0	0	0	0.181947	0	0	0	0.0808335
NR_135615.1	0	0	0	0	0	0	0	0	0	0	0	0	0	0	0	0	0	0	0	0
NR_135619.1	0	0	0	0	0	0	0	0	0	0	0	0	0	0	0	0	0	0	0	0
NR_033815.2	0	0.35717	8.23629e-07	0	0	0	0	0	0	0	0.772092	0.155833	0.28507	0	0	0	0.103209	0	0	0
NR_135622.1	0	0.165875	0	0.144288	0.0814896	0	0.138746	0	0	0	0.116983	0	0	0	0.0547979	0	0	0.0752402	0	0
NR_036206.1	0	0	0	0	0	0	0	0	0	0	0	0	0	0	0	0	0	0	0	0
NR_135528.1	3.2976e-08	0	3.24619e-08	0	0	3.00786e-08	0	4.5922e-09	0	0	0	0	0.249475	0	1.79238e-08	0	0	0	0	0
NR_038103.1	3.79176	5.1352	7.62565	2.98051	9.11244	9.69339	9.77792	7.49887	12.9603	12.7427	5.29708	10.1529	0.562602	6.70279	42.5232	10.0097	12.9067	5.83146	1.51088	8.25334
NR_038104.1	5.34351	0.00166769	0.669629	8.1349	0	3.1098	0	7.5748	0.417745	0	0	3.90108	2.80859	7.27452	38.4374	4.5137	3.68146	7.39894	2.25564	4.54854
NR_135599.1	0	0.103535	0	0.150425	0	0	0	0	0	0.103168	0	0	0.325885	0.15248	0.402912	0	0	0.38786	0	0
NR_135598.1	0	1.23844e-05	0	0	1.61803e-05	0	0	0	0	0	0	0	3.06939e-10	0	0	0.0332864	0	0	0	0.13774
NR_135602.1	0	0.0809588	0	0	0.221303	0	0	0	0.150985	0	0	0	0	0	0	0	0	0	1.03761e-10	0
NR_135600.1	0	0.355689	0	0	0	0	0	0.00156469	0	0	2.15446e-09	0	0	0	0	0.0708941	0	0	0	0.000822638
NR_135603.1	0	8.67455e-09	7.25839e-07	4.50854e-09	0	0	2.50128e-06	0.0094186	0	0	0	0	0	0	0.00238527	3.41308e-09	0	2.69439e-07	0	0
NR_135604.1	2.32702e-08	0	0	0.479846	6.41346e-10	4.51294e-05	8.53475e-07	0	0	0	0	0	0.0543548	0	0.00701992	0.00480127	0	0.0567714	9.14598e-08	5.79636e-05
NR_135606.1	0	0	0	0	2.51863e-05	0	0	0	0	0	0	0	0	0	0	2.69965e-09	0	0	0	0
NR_104245.1	0	0	0.0656686	0	0	0	0.000735927	0	0.120968	0	0.0612572	0	0	0	0	0	0	0	0	0
NR_028287.1	0.0589865	0.1599	0.0652511	0.208999	0.047089	0.0758265	0	0	0.0352749	0	0.138266	0.0295313	0.166829	0.128858	0.0376244	0	0.106317	0	0.140631	0.0315096
NR_003954.1	0	0	0	0	0	0	0.0708098	0	0	0	0	0	0	0	0	0	0.0378554	0	0	0
NR_026551.1	31.5622	31.4102	36.0515	35.6819	33.3276	44.3811	35.1027	44.1831	49.0211	39.3168	29.5702	42.0558	32.7962	28.1927	42.9038	42.2474	46.1141	35.8108	39.2805	49.7917
NR_135667.1	0	0	0	0	0	0	0	0	0	0	0	0	0	0	0	0	0	0	0	0
NR_073010.2	0.0546586	0.200051	0.135309	0.250677	0.0932097	0.118124	0.321968	0.0977804	0.0689555	0.767033	0.27247	0.165858	0.203206	0.360454	0.190013	0.0821241	0.0725407	0.456084	0.333569	0.162496
NR_135666.1	0	0	0	0	0	0	0	0	0	0	0	0	0	0	0	0	0	0	0	0
NM_001321551.1	0	0	0	0	0	0	0	0	0	0	0	0	0	0	0	0	0	0	0	0
NR_135737.1	0	0	0	0.244395	0.276054	0.1481	0.272648	0.177275	0	1.60242	0.533222	0	0.72812	0.999164	0.219437	0	0	0.337728	0.553513	0.553571
NR_135628.1	0.12414	0	0.369228	0.962362	0	0	0	0.114926	0	0.0242412	0.916993	0.0498424	0	0	0	0.0658328	0.31242	3.72869e-08	0	0
NR_135755.1	0	0.043664	3.74233e-05	0	1.85489e-07	0	0.0042681	0	0	4.97643e-05	1.24242e-10	0	0	0	1.5389e-09	0	1.07437e-07	0.0325614	4.74638e-10	0
NR_135759.1	0	0.398392	1.5552e-06	9.19231e-08	1.65797e-09	0	2.11554e-07	0	0	2.04222e-07	0.00053957	5.02525e-09	0.230999	0.105398	4.15725e-09	0	0	0.00426359	9.23633e-07	0
NR_135756.1	0	2.86562e-10	0.359673	0	0.002623	2.34924e-09	0.867986	0	0.422119	2.05245e-05	0.000602551	0	0.000141377	0	6.09445e-07	0	0.229324	0.0138032	2.1197e-06	0
NR_135757.1	0	0	0	0	0	0	0	0	0	0	0	0	0	0	0	0	0	0	0	0
NR_135754.1	0	0	4.37118e-10	0	0	0	0.347015	0	0	1.02825e-05	0	0	0	0	0.0273249	0.969225	0	0	4.01673e-05	0
NR_135758.1	0	0	0	7.33521e-05	1.55843e-10	0	0	0	9.4544e-11	1.33401e-09	7.18787e-08	0	0	0	0	0	0	0	0	0
NR_028102.1	0	0.280477	2.81372e-09	2.79522	3.25219e-09	0	3.74515e-06	0	8.59425e-08	0.134748	4.18045e-09	0	1.47705	0.0399224	1.90691e-05	0.00133671	0.0225653	1.70031e-05	1.2329e-08	6.0063e-08
NR_135659.1	0	0	0	3.49675e-10	0	0	0	0	0	0	0	0	0.247235	0.01293	0	5.4111e-05	0.00083632	0	0	6.25591e-09
NR_135661.1	0	0	0	2.90921e-10	0	0	0	0	0	0	0	0	1.54246e-08	0.020212	0	8.24282e-06	0.000301491	0	0	3.52017e-09
NR_135660.1	0	0.0083947	0	0.119351	0	0	0	0	0	0.000920109	0	0	0.0267336	1.65775e-05	1.45696e-06	0	4.57027e-05	0	0	0
NR_135662.1	0	0.30671	4.03675e-10	2.58	1.59827e-09	0	7.48417e-06	0	9.38535e-08	0.0605823	0	0	8.85801e-09	0.0661597	1.03886	0.000172157	0.00747034	7.91414e-06	2.57201e-09	3.25309e-08
NR_135663.1	0	0.0953968	0	0.577757	0	0	7.72013e-08	0	0	0	0	0	1.07954	0.000115402	0.198479	0	0	0	0	0
NR_135664.1	0	0.00894123	0	0.108327	0	0	0	0	0	0.000423888	0	0	7.67974e-10	2.58188e-05	0.031871	0	1.57345e-05	0	0	0
NR_135824.1	0	0.111999	0	0.00392674	0	0	0	0	0.103392	0.112302	0.0232335	0	0.0773818	0.178222	0.176801	0	0.0267601	0	0.0883956	0.150921
NR_133644.1	0	9.59541e-09	0	0	0	0	0	0	7.59172e-07	2.40391e-09	2.07994e-07	0	9.30842e-07	2.19676e-08	8.89961e-06	0	0	0.000517188	7.44134e-09	0
NR_136147.1	0	0	0	0	0	0	0	0	0	0	0	0	0	0	0	0	0	0	0	0
NR_033846.2	0	0	0	0	0	0	0	0	0	0	0	0	0	0	0	0	0	0	0	0
NR_104312.1	7.37622	8.94581	5.91093	7.10536	7.79779	5.77661	7.64958	5.96162	9.06458	10.5045	6.20954	4.67856	6.70006	8.64821	8.29186	9.05837	6.57138	6.92136	6.68123	6.64822
NR_104313.1	0	0	1.82291	0	3.04694	0	1.8529	1.51711	0	4.78	1.9712	0	4.57408	0	5.08195	0	1.6291	0	2.50348	1.55009
NR_135815.1	0	0.196266	0	0.0727343	0	0	0	0.0565991	0	0.121938	0.0796064	0	0	0.0806466	0.0735939	0	0	0.179195	0	0
NR_136176.1	0	0	0	0	0	0	0	0	0	0	0	0	0	0	0	0	0	0	0	0
NR_136183.1	1.18632	3.31903	2.3481	6.3886	3.24333e-06	1.4458	0.5629	0.507326	0.562802	1.94427e-05	2.77337	2.32014	2.27787	3.93405e-07	2.72995	0.955134	0.438409	0.000546549	2.794e-07	4.82104e-05
NR_136182.1	0.653133	0.553065	0.314741	0.648071	2.63161e-06	0.161521	1.5997	0.112007	0.187599	2.00491e-05	1.71632	1.24257	0.540651	4.30883e-07	1.3863	0.103133	0.231657	0	1.53183e-09	5.40169e-06
NR_136184.1	1.346	0.785515	0.421073	0.440044	4.8225	0.767029	4.57797	1.78323	2.43582	5.31895	2.36158	2.89475	1.44225	4.27325	3.10585	0.479443	2.84016	0	0.115203	0.844335
NR_136217.1	0	0	0	0	0	0	0	0	0	0	0	0	0	0	0	0	0	0	0	0
NR_104031.1	0	0	0	0	0	0	0	0	0	0	0	0	0	0	0	0	0	0	0	0
NR_136221.1	0.0246248	0.0792839	0.026857	0.170797	0.115993	0.146888	0.309763	0.126657	0.0293157	0.55629	0.226279	0.0243728	0.13869	0.211387	0.0686889	0.0603539	0.0446589	0.356637	0.156702	0.0795626
NR_136222.1	0	0	0	0	0	0	0	0	0	0	0	0	0	0	0	0	0	0	0	0
NR_134902.1	0	0	0	0	0	0	0	0	0	0	0	0	0	0	0	0	0	0	0	0
NR_134901.1	0.109948	0	0	0	0	0	0	0	0	0	0.162796	0.055796	0	0	0	0.0729806	0	0	0	0
NR_135078.1	1.0531e-05	7.8e-06	0	0.0100026	0	0	1.64773e-05	0	1.12382e-06	1.67781e-05	0	0.0572198	0	0	0	2.63381e-07	0	0	0.000118105	0
NR_134905.1	0	0.205447	0	0	0	0.0275617	0	0.0345363	0.0774525	0	0	0	0	0	0	0	0.0588007	0	0	0.0701329
NR_134904.1	0	0	0.136	0.196354	0	0	0.11309	0	0	0.1577	0.0982575	0	0.255531	0	0.0818607	0	0	0.283876	0.0830595	0
NR_136249.1	0.0169253	0.220169	0.0758381	0.0243098	0.109741	0.0441563	0.135484	0.105709	0.102559	0.227506	0.291465	0.08584	0.169012	0.248542	0.348936	0	0.0463561	0.234952	0	0.0550159
NR_136244.1	0	0	0	0	0.140201	0	0.276941	0	0	0	0.135405	0.0877325	0	0	0	0	0	0.171523	0	0
NR_001575.1	0.154911	0.176428	0.0781919	0.402364	0.332323	0.198497	0.420651	0.15056	0.16174	0.313851	0.371448	0.169036	0.273742	0.396906	0.245235	0.198741	0.229236	0.435673	0.326621	0.12839
NR_003129.1	0.402243	0.221641	0.220523	0	0	0.0865882	0.432952	0	0.11565	0.13116	0.150442	0.412935	0	0.140689	0.393211	0.103772	0.353872	0.417612	0.155323	0.335742
NR_136250.1	0	0	0	0	0	0	0	0	0	0	0	0	0	0	0	0	0	0	0	0
NR_136268.1	0	0	0	0	0	0	0	0	0	0	0.0952091	0	0	0	0	0	0	0	0	0
NR_110563.1	0	0	0	0	0	0	0	0	0	0	0	0	0	0	0	0	0	0	0	0
NR_136309.1	1.87901e-10	0.288048	0.399705	0.361965	0.890366	0	0	0.435729	0	0	0	0	0	0.252225	0	0	7.04569e-09	0.589575	0	0
NR_104097.1	0	0	0	0	0	0	0	0	0	0	0	0	0	0	0	0	0	0	0	0
NR_104096.1	0.18274	0.510448	0.369375	0.396831	0.20778	0.312565	0.453068	0.371229	0.322408	0.643251	0.441575	0.176285	0.680075	0.446353	0.24089	0.364969	0.240011	0.814052	0.41387	0.260178
NR_104095.1	6.10041e-05	0.000218707	5.79597e-05	0.000245689	7.29134e-05	5.35221e-05	0.000136027	2.738e-05	0.000130596	0.000306447	0.000103942	1.40127e-05	0.000158097	0.000115374	4.28223e-05	6.99235e-05	0.000112222	0.00049158	4.14408e-05	5.97334e-05
NR_136306.1	2.18669	1.42026	1.34063	1.27252	1.25008	1.33723	1.61949	1.72703	2.00685	0.878425	0.809143	3.37365	1.54203	2.62873	1.23648	1.00763	1.685	1.70335	1.48977	1.11451
NR_026716.2	0	0	0	0	0	0	0	0	0	0	0	0	0	0	0	0	0	0	0	0
NR_136242.1	9.00991	21.0654	6.97503	13.497	12.1973	9.7141	10.2566	10.7738	10.8298	6.57138	17.5614	9.00926	17.6286	20.4802	11.6446	9.9057	10.5022	14.7683	10.0426	9.19664
NR_046331.1	0.0982404	0.182602	0.259129	0	0	0.533702	0.198402	0.458198	0.403797	0.377191	7.61848e-08	0.665829	0.980056	0.158671	0.0307167	0.451744	0.433121	5.974e-08	0.732864	0.293442
NR_134911.1	0.702683	1.2384	0	0	0	0.256461	0	0.660105	0	0	0	0	0.921832	5.41179e-09	0	0	0	0	0.518265	0
NR_027712.1	0.0112846	0.048947	0.0253109	0.0323033	0.0550324	0.00984225	0.0361211	0	0	0.0152553	0.0176633	0.034476	0.0483112	0.0330509	0.0291028	0.0249351	0	0.0671787	0.0182973	0.0122449
NR_136541.1	0.623968	1.42751	1.04354	0.702392	1.08173	0.711845	1.42361	0.8483	1.01198	0.860876	1.11918	0.422633	1.19721	0.502977	1.0579	0.738426	0.9947	1.84075	1.83601	1.07491
NR_136551.1	0	0	0	0	0	0	0	0	0	0	0	0	0	0	0	0	0	0	0	0
NR_027791.3	0.0799072	0.191494	0.145481	0.12979	0.0508026	0.168493	0.130926	0.141005	0.0752013	0.184223	0.193639	0.198545	0.141368	0.166038	0.0621167	0	0.158796	0.257861	0.172467	0.0588712
NR_136549.1	0	0.0709379	0	0	0	0	0	0	0	0	0	0	0	0.0501554	0	0	0.0427854	0	0	0
NR_136548.1	0.0372809	0	0.0242515	0.0292988	0	0	0	0	0	0.094269	0	0.0138914	0	0	0	0	0	0	0	0.0442003
NR_136547.1	0	0.193439	0	0.124286	0	0.0495261	0.10009	0.0377052	0.0342216	0.0652621	0.0819207	0.0154473	0.0501139	0.144077	0.0911699	0	0.0377745	0.325056	0.0790326	0.0192043
NR_136544.1	0.0338731	0	0	0	0	0.0112911	0	0.227192	0.0483548	0.0797398	0	0	0.198989	0	0.194465	0	0.206167	0.151255	0	0.110874
NR_136545.1	0.225734	0.429116	0.159132	0.245792	0.327755	0.227603	0.349372	0.248539	0.404403	0.356678	0.250094	0.253128	0.484057	0.273839	0	0.364106	0.208361	0.483217	0.38196	0.184015
NR_111004.2	0	0	0	0	0	0	0	0	0	0	0	0	0	0	0	0	0	0	0	0
NR_111005.2	0	0	0	0	0	0	0	0	0	0	0	0	0	0	0	0	0	0	0	0
NR_136543.1	0	0	0	0	0	0	0	0	0	0	0	0	0	0	0	0	0	0	0	0
NR_136575.1	0	0	0	0	0	0	0	0	0	0	0	0	0	0	0	0	0	0	0	0
NR_136574.1	0	0	0	0	0	0	0	0	0	0	0	0	0	0	0	0	0	0	0	0
NR_136576.1	0	0	0	0	0	0	0	0	0	0	0	0	0	0	0	0	0	0	0	0
NM_152769.2	0.203995	1.34901	0.307158	1.5763	0.106345	0.355047	1.14132	0.503723	0.040695	0.462256	1.13626	0.368846	0.713593	0.8009	0.845869	0.401006	0.418371	2.02506	0.87369	0.329739
NR_135924.1	0.512694	0	0	0	0.464889	1.55859	0.942554	1.45688	1.90703	0.214676	0	0	0	0	0.474024	1.4787	0.743808	0	0.475485	1.10832
NR_135923.1	0.248535	0.638873	0	1.02054	0.0385482	0	0.000394592	0.668839	0	0	1.26034	0.556588	0.11987	0.59701	0	0	0.766274	0.966874	0	0
NR_130760.1	0	0.0547049	0.0992508	0.10794	0	0	0.170862	0.018372	0	0	0	0	0	0	0	0	0.0164866	0	0	0
NR_136591.1	0	2.04142e-07	0.268342	0.00023293	0.97034	0.299348	0	0.429027	0.0376335	0.19054	1.03057	0	0	0.277362	0.15978	0	0.679082	1.58368	0	1.55268e-08
NR_136592.1	0	1.68887	0.115722	0.863077	0	0.131353	1.09318	0.318145	0.360975	1.04264	0.953432	0.306113	1.67097	1.25586	0.585851	0.451913	0	1.19001	2.5963	0
NR_136641.1	0	0	0	0	0	0	0	0	0	0.193641	0	0	0	0	0	0	0	0	0	0
NR_136637.1	0.231741	0.829	0.285553	0.897918	0.26295	0.403058	1.29853	0.67544	0.421091	0.965651	1.37861	0.493634	1.84949	0.713801	1.07497	0.356988	0.528922	1.65444	2.22193	0.225983
NR_136625.1	0	0	0	0	0	0	0	0	0	0	0	0	0	0	0	0	0	0	0	0
NR_136624.1	0	0	0	0	0	0	0.0519137	0	0	0	0	0	0	0	0	0	0	0	0	0
NR_136638.1	0	0.0544341	0.168751	0.057281	0	0.0436685	0	0.104542	0.035876	0	0.0786121	0	0.0715638	0.0581078	0.0647027	0	0	0	0.0648659	0
NR_136644.1	0.378897	1.8421	0.342194	1.582	0.670575	0.354852	2.25128	0.46866	0.693647	2.10999	1.779	0.306488	1.48215	1.65372	2.28714	0.649584	0.302169	2.75332	2.85223	0.363274
NR_136590.1	0.221141	1.62625	0.396927	0.96269	0	0	0.961849	0	0	0.952588	0.554723	0.302246	0.892347	1.55918	1.36971	0.245128	0	0.560654	1.3326	0.678413
NR_136639.1	0	0	0	0	0	0	0	0	0	0	0	0	0	0	0	0.0834999	0	0	0	0
NR_136667.1	0	0	0	0	0	0	0	0	0	0	0	0	0	0	0	0	0	2.77255e-10	0	0
NR_136666.1	0	0.172375	0	4.18797e-10	0	0	0	0	0	0	0	0	0	0	0	0	0	0	0	0
NR_136665.1	0	0	0	0	0	0	0	0	0	0	0	0	0	0	0.165622	0	0	0	0	0
NM_001024661.2	0	0	0	0	0	0	0	0	0	0	0	0	0	0	0	0	0	0	0	0
NR_136664.1	0	0	0	0	0	0	0	0	0	0	0	0	0	0	0	0	0	0	0	0
NM_001324076.1	0	0	0	0	0.586188	0	0	0.188218	0.219037	0	0.566137	0	0	0.26521	0	0	0	0	0	0
NR_136708.1	0.11629	0.0724021	0.0651331	0.0556275	0	0	0.0930875	0	0	0	0	0.0270952	0.0276217	0.113712	0.0593924	0	0	0	0.0944903	0
NR_136706.1	0.0448119	0.0242885	0	0.0321539	0.0363629	0.0389698	0.035871	0.0233233	0.0271422	0.0903526	0.0351286	0.0454545	0	0.0657278	0.0288704	0	0	0.0444333	0.0728232	0.024277
NR_027840.1	0.656601	0.513938	0.692715	0	1.18034	0.75078	0.907931	1.92991	0.636689	1.36036	0.258663	1.90499	1.74988	0.65632	1.30619	0.721985	0.331299	1.05466	0.313159	0.945916
NR_104629.1	0.768209	1.63251	1.73587	1.37599	0.577792	1.64636	0	0.639031	0.618699	0	0.846668	0.800761	1.51768	3.44664	0.915752	1.16007	0.644802	0.393671	0.369576	0.96386
NM_001291475.1	0	0	0	0	0	0	0	0	0	0	0	0	0	0	0	0	0	0	0	0
NM_001291474.1	0	0	0	0	0	0	0	0	0	0	0	0	0	0	0	0	0	0	0	0
NM_001291473.1	0	0	0	0	0	0	0	0	0	0	0	0	0	0	0	0	0	0	0	0
NM_001291471.1	0	0	0	0	0	0	0	0	0	0	0	0	0	0	0	0	0	0	0	0
NM_001291469.1	0	0	0	0	0	0	0	0	0	0	0	0	0	0	0	0	0	0	0	0
NM_001291468.1	0	0	0	0	0	0	0	0	0	0	0	0	0	0	0	0	0	0	0	0
NR_111970.1	0	0	0	0	0	0	0	0	0	0	0	0	0	0	0	0	0	0	0	0
NR_130638.1	0.685755	0	0.44209	0	0	0	0	0	0	0	0	0	0	0	0	0	0	1.40337	0	0
NR_110369.1	0	0	0	0	0	0	0	0	0.0135263	0	0	0	0	0.0163777	0	0	0	0	0.0362913	0
NR_130145.1	1.8014	1.60124	1.63897	1.01683	1.25242	0.875644	1.5367	1.12629	0.847191	0.958302	1.05536	1.44151	1.20071	0.87159	0.29135	0.86707	0.635463	0	0.549653	1.00236
NR_130144.1	0	0.212442	0.249458	0.66515	0	0.393887	1.45734	0.150904	0.504196	0.38806	0	0	0.203131	0.500884	0	0.184514	0.714745	1.47617	0	0.146729
NR_130143.1	0	0.263536	0	0.458244	0	0.0672122	0.49642	0	0	0.31308	1.90758	0.0963967	0.590739	0.432849	0.187579	0.152033	0.0930053	0.351998	0.300764	0
NR_027503.1	0	0	0	0.181961	0	0	0	0	0	0	0	0.12464	0	0.374869	0.154108	0	0	0	0	0
NR_073509.1	0	0.0402438	0	0	0	0.0281109	0	0	0	0	0	0.0388164	0	0	0.0418037	0.0455021	0.0318327	0	0	0
NR_038450.1	0.663216	0	0	0	0	0	0	0	0	0	0	0	0	0.648817	0	0	0	0.0969107	0	0
NR_024054.2	3.23609	4.00192	1.82908	1.30777	2.16776	1.95493	2.34684	1.99694	0.507972	1.21397	2.61369	1.88572	2.12652	2.4055	2.75271	0.854998	2.19358	4.89971	3.27453	1.31622
NR_015433.1	23.5032	26.1295	19.5246	18.158	30.2014	20.2741	19.3456	23.0825	18.6616	16.9655	21.3438	17.6796	27.8604	23.8483	12.2686	13.0525	26.9156	23.8379	12.9029	20.736
NR_111973.1	1.69348	2.18418	2.15237	2.7728	3.0226	1.30938	3.39486	2.2562	1.81037	2.8768	3.04512	1.47056	1.88591	2.31984	1.88676	1.02964	2.73435	3.40357	2.08998	1.77529
NR_036683.1	0	0.0520549	0.0537937	0.275489	0.23364	0.0416909	0.15342	0.100087	0.116948	0.390819	0.226333	0.0486021	0.273318	0	0.197505	0	0.0875713	0.28713	0.077866	0.104151
NR_110759.1	0	0.0673849	0.0869496	0.111252	0.0250693	0.0134695	0.247836	0.0645387	0.0188166	0.0832925	0.145701	0.0315666	0.0443553	0.158966	0.119802	0.0171197	0.0705974	0.24703	0.126281	0.0168203
NR_104151.1	0	0	0	0	0	0	0	0	0	0	0	0	0	0	0	0	0	0	0	0
NR_003288.2	0.236513	0.541682	0.266365	0.88835	0.376403	0.282479	1.55941	0.452677	0.141999	1.91925	0.903669	0.154665	0.95284	1.04274	0.732859	0.137829	0.613593	1.02917	0.982378	0.267506
NR_026921.1	0.0232275	0.0421642	0.0520776	0	0.0303702	0.0174997	0.0887819	0.0233904	0	0	0	0.0215838	0.0275414	0	0	0.067365	0	0.0360116	0.0325598	0.0236365
NR_126565.1	0	0	0	0	0	0	0	0	0	0	0	0	0	0	0	0	0	0	0	0
NR_034031.1	25.7954	32.3246	28.6579	23.3589	26.5152	26.8316	19.4667	33.6903	18.5661	11.3467	27.3859	35.1529	30.0576	28.959	19.1947	16.1912	34.1273	28.3539	14.1416	22.6958
NR_104050.1	0	0.88345	0	0	0	0	0.607798	0	0	0.724227	0.680399	0	2.52313	1.00664	0	0	0.531034	0	0	0
NR_104051.1	0	0	0	2.94362e-06	0	0	1.65646	0	0	7.01033e-10	0.305101	0	0	0.924045	0	0.712897	0	0.000619651	1.20049	2.67348e-06
NR_033412.1	0.0201201	0.226327	0.0448767	0.399086	0	0.052569	0.51825	0.072954	0.0242156	0.338847	0.332767	0.0406659	0.395551	0.258675	0.167658	0.0880352	0	0.308646	0.26299	0.0433186
NR_033420.1	0.100207	0.404557	0.0445114	0.0642032	0.163373	0.0519261	0.440046	0.0724341	0.144701	0.20123	0.385431	0.0806936	0.343865	0.679169	0.246565	0.0876149	0.165211	0.487504	0.45133	0
NM_001271682.1	0.500923	0.155146	0.561128	0.205387	0.115997	0.373387	0.114565	0.223471	0.0866871	0.288569	0.336086	0.290346	0.203968	0	0.368826	0	0.457319	0.425735	0.348875	0.232608
NM_001040105.1	0	0	0	0	0	0	0	0	4.70987e-09	0	0	0	0	0	0	0	0	0	0	0
NR_136654.1	6.23145	17.2453	7.90831	10.1583	13.7609	5.3619	15.1264	8.98313	8.50035	19.5104	12.2615	8.32529e-05	12.5887	15.069	9.14565	3.33219	17.0951	21.4214	8.80936	3.20357
NR_104456.1	0	0.15543	0	0.173101	0	0.0494317	0.130897	0	0	0	0	0.770585	0.858212	0.195726	0	0	0	0.297337	0	0
NR_136657.1	0.37751	0.760349	0.355867	0.117885	0.599286	0.452194	0	0.546764	0.397623	0.540712	0.626984	0.471688	0	0.0959615	1.19013	0.390654	0.430155	1.35425	0	0.394703
NR_136655.1	0.441587	1.03466	0.248644	0.265359	0.352816	0.229492	0.310692	0	0.244136	0	0.60846	0.548414	0	1.06883	0	0.823776	0.734884	0.65811	0.477207	1.23606
NR_136656.1	0.0868265	0	0.506443	0.653639	0.232917	0.813825	0	1.35886	0.103206	0.355786	0	0.833594	0	0	0.426441	0.20138	0.201599	0	0	0.775029
NR_024608.1	0.123021	0.052591	0.0818749	0.0350396	0.03985	0.0424719	0.0391178	0.0508229	0	0	0	0.0744069	0.0346411	0.0713418	0.188866	0.0269273	0.111281	0.19372	0.0398906	0.0264662
NR_034158.1	0	0	0	0	0	0	0	0	0	0	0	0	0	0	0	0	0	0	0	0
NR_002734.2	0.343372	0.124638	0	0	0	0.0990056	0	0.480914	0.413672	0.308121	0	0	0	0	0.296317	0.379315	0.105505	0.452839	0	0.124196
NR_002824.3	2.21266	10.6668	2.82264	8.95027	1.88672	3.07812	6.60166	2.5825	3.99286	3.77149	7.13121	1.79826	8.41171	8.31549	7.56797	2.48011	1.79088	9.27146	6.36016	2.71988
NR_133665.1	0	0	0	0	0	0	0	0	0.00382672	0	0	0	0	0	0	0	0	0	0	0
NM_001001671.3	1.23202	1.07879	0.686161	1.01218	0.774251	1.53618	0	1.71197	1.15339	0.472484	0.825525	0.900786	0.396485	0.828952	0.681899	1.10545	1.04061	1.48208	1.14367	0.764242
NM_001301233.1	0	0	0	0	0	0	0	0	0	0	0	0	0	0	0	0	0	0	0	0
NM_001105677.2	0	0	0	0	0	0	0	0	0	0	0	0	0	0	0	0	0	0	0	0
NR_135910.1	0	0	0	0	0	0	0	0	0	0	0	0	0	0	0	0	0	0	0	0
NR_135912.1	0	0	0	0	0	0	0	0	0	0	0	0	0	0	0	0	0	0	0	0
NR_135911.1	0.0555063	0.104301	0.0651855	0.062408	0.0919747	0.0499956	0.144865	0.0604102	0.0667019	0.249513	0.350631	0.14043	0.136022	0.128115	0.0378229	0.0494833	0.12986	0.219692	0.0942916	0.0239405
NR_135913.1	0	0	0	0	0	0	0	0	0	0	0	0	0	0	0	0	0	0	0	0
NR_024466.1	2.59833	4.26734	1.7243	2.76045	1.22373	2.89617	2.68766	1.77365	2.57356	1.82819	1.74267	2.06965	2.21577	2.73483	2.3016	3.45479	2.35232	3.99072	2.89396	3.16484
NR_109858.1	0	0	0	0	0	0	0	0	0	0	0	0	0	0	0	0	0	0	0	0
NR_075077.1	0	0.0475052	0	0	0	0	0	0	0	0.0588053	0.101121	0.0217724	0	0.0635138	0.0561024	0.0566449	0	0.151805	0	0
NR_110991.1	0	0	0	0	0.0645711	2.35074e-06	0	0	0	0	0	0	0	0	0	0	0	0	0.0647354	0
NR_120651.1	0	0	0	0	0	0	0.412844	0	0	0	0	0	0	0	0	0	0	0	0	0
NR_033255.1	20.2959	21.5774	19.984	22.031	34.8427	15.6449	16.9918	23.0075	24.9477	26.5595	14.3395	11.8262	12.7119	16.7448	21.3231	21.5648	18.8745	25.8775	17.1769	21.7364
NR_134318.1	4.11399	8.63189	3.49496	7.9619	2.04117	4.96735	8.0835	3.27181	0.630111	4.5655	8.54849	0.714441	10.1132	6.74185	0.949369	0.876233	6.17429	12.7015	2.01906	2.4723
NR_134906.1	0	0	0	0.099727	0	0	0	0	0	0	0	0	0	0.176887	0	0.0475745	0	0	0	0
NR_134903.1	0	0	0	0	0	0	0	0	0	0	0	0	0	0	0	0	0	0	0	0
NR_126442.1	0	0.366391	0	0	0.159371	0	1.95638	0	0.270882	0.538136	0.398893	0	0	0.361717	0	0	0.279069	0.432677	0	0.146796
NR_136298.1	0	3.16159e-06	0.0566982	0	0.425725	1.70271e-10	1.19323	0.692644	0.506326	0.0699625	0	0	4.47133e-06	0.00294992	2.86396	3.71958e-05	1.63124e-07	0	0	0
NR_130900.1	0.148565	0.421182	0.0475523	0.226148	0.211259	0.296315	0.0830154	0.350946	0.277132	0.0465275	0.387197	0.530074	0.48745	0.475559	0.145862	0.150418	0.276484	0.372982	0.134559	0.294983
NR_130142.1	0	0	0	0	0	0	0	0	0	0	0	0	0.0237133	0	0	0	0	0	0	0
NR_135297.1	0	0	0	0	0	0	0	0	0	0	0	0	0	0	0	0	0	0	0	0
NR_135282.1	0.0568219	2.5605	0.969192	0.852769	2.51296	0.0896758	4.28658	5.61045	9.10538	7.75484	3.2911	0	4.98787	1.85982	2.54217	8.27585	3.9862	0.0086011	8.16263	5.1088
NR_130977.1	0.0727451	0	0.336753	0	0	0.25177	0	0	0	0	0	0.000455353	0	0	0	0	0	0	1.44856e-09	0
NR_024113.1	32.2293	30.4558	26.9293	16.4071	37.0385	22.2943	21.869	27.5225	15.3764	20.6568	20.1475	27.1545	27.238	20.1601	12.6535	12.9857	32.5272	22.5001	14.6805	21.4711
NR_126006.1	0	0	0	0	0	0	0	0	0	0	0	0	0	0	0	0	0	0	0	0
NR_036496.1	5.14381	7.2349	6.20865	4.85945	7.39627	5.6376	6.58761	7.09768	5.90143	5.73461	7.86822	7.45068	6.7132	5.76795	5.31964	5.37679	7.64364	9.7836	5.3922	7.14851
NR_040115.1	0	0	0	0	0	0	0	0	0	0.0495723	0	0.0730704	0	0	0	0	0	0	0	0
NR_027277.2	0.140333	0.168438	0.213442	0.0521819	0.142293	0.136451	0.13727	0.122307	0.211017	0.383554	0.171218	0.0811104	0.243496	0.0642353	0.342682	0.0844171	0.066447	0.148771	0	0.0547984
NR_046444.1	0	0	0	0	0	0	0	0	0	0	0	0	0	0	0	0	0	0	0	0
NR_104155.1	0	0	0	0	0	0	0	0	0	0	0	0	0	0	0	0	0	0	0	0
NR_136542.1	0	0	0	0.0528565	0	0	0	0	0	0	0	0	0	0	0	0	0	0	0.0554395	0
NR_135286.1	0.0278001	0	0	0	0	0.0120879	0.0667603	0	0	0.0186841	0.0217607	0	0.0198097	0	0	0.0152947	0	0	0	0
NR_046201.1	0.985158	2.52189	0.514996	1.50801	0.425841	0.742495	0.879788	1.36732	0.725776	1.65085	2.03491	0.999285	1.1232	2.36604	1.49756	0.4336	0.910872	1.7056	1.17404	0.925101
NR_026833.1	0	0	0	0	0	0	0	0	0	0	0	0	0	0	0	0	0	0	0	0
NR_033379.1	0.0176804	0.096935	0.0396197	0	0	0.046143	0.0566275	0.0368126	0.0214193	0	0.0553658	0.0538078	0.0383198	0.0778222	0.0687142	0.0389142	0.0161486	0	0.0861928	0.0574939
NR_033862.1	0	0	0	0	0	0	0	0	0	0	0	0	0	0	0	0	0	0	0	0
NR_038864.1	0.0056731	0.0538388	0	0	0	0.0139034	0.0714703	0.00275015	0.0170731	0.0547783	0.126258	0.0150451	0.0194016	0	0.0875881	0.0275491	0.0504416	0.0297289	0.0226185	0.0142964
NR_134458.1	0.000105794	0	0	0	0	0	0	0	0.0620145	0	0	0	0	0	0	0	0	0	0	0
NR_027379.1	0	0.0568117	0.0391943	0	0	0	0.139886	0	0	0	0.0815854	0.0344821	0.0745795	0.0530896	0.0458039	0.0374054	0.0310355	0.0337589	0.0289319	0.0184167
NR_135292.1	0.761574	1.77787	0.643826	1.72699	0.86851	0.892798	1.21418	0.983772	0.577623	1.05762	1.17236	1.2806	1.52106	1.36373	1.07456	0.697695	0.87529	1.45756	1.28099	1.05161
NR_136642.1	0	0	0	0.0147806	0	0	0.0206829	0	0.0249535	0.0114881	0	0	0	0.0155449	0	0	0	0.0169488	0.0167377	0
NR_027392.2	0	0.10164	0	0	0	0.0494473	0	0	0	0	0.139379	0	0.211532	0	0.411547	0.0525436	0	0	0.157083	0.0821542
NR_135825.1	0.0656282	0.0768486	0	0.0762478	0.0265952	0.014298	0	0.0170788	0	0	0.0370656	0	0	0	0.0634617	0.0362049	0.0256285	0.100329	0.0450964	0.0177771
NR_046102.1	0	0.167317	0	0.309536	0	0.214011	0.120827	0.233331	0.091639	0.431082	0.356572	0.0745776	0.415306	0.445292	0	0.0772576	0.134523	0	0.14749	0.0791945
NR_029420.1	0.481777	0.208903	0.57566	0.414828	0.93713	0.642418	1.13125	0.501502	0.427986	0.860981	0.402255	0.941397	0.228868	0.282658	0.538006	0.636137	0.938326	0.89172	0.466517	0.487207
NR_046101.1	0.367577	0.750735	1.22659	0.274761	0.575411	0.783342	0.952625	0.728847	0	0.801298	0.592052	0.359369	0.268654	0.553291	0.487566	0.211824	0.643305	0.360175	0.606932	0.386502
NR_134320.1	0	0.129941	0	0	0	0	0	0	0	0	0	0	0	0	0	0	0	0	0	0
NR_134321.1	0	0	0.262843	0	0	0	0	0	0.314864	0	0	0	0	0	0	0.371664	0.0855697	0	0	0
NR_134322.1	0.680588	0.385616	0.344188	0.449822	0.219169	0	0	0.183787	0	0	0.227143	0.122868	0.306479	0.318114	0	0	0	0	0	0.129256
NR_135243.1	0	0	0	0	0	0	0	0.0305516	0	0	0	0.0357116	0	0	0	0	0	0	0.0572141	0
NR_135244.1	0	0	0	0	0	0	0	0.0427448	0.022962	0	0	0	0	0	0	0	0	0	0	0
NR_039983.2	0	0.263277	0.380518	0.616842	0.0755898	0.16673	0.244716	0.0533816	0.130595	0.443367	0.202975	0	0.52577	0.340583	0.330501	0.0600445	0.068924	0.649848	0.488209	0.0500735
NR_135279.1	0.180815	0	0	0	0	0	0	0	0	0	0	0	0	0	0	0	0	0	0	0
NR_111905.1	0	0	0	0	0	0	0	0	0	0	0	0	0	0	0	0	0	0	0	0
NR_038941.1	0.212588	0.875015	0.143703	0.506271	0	0.235037	1.36448	0.0733022	0.0917868	0.542537	0.21691	0.386686	1.09029	0.648072	1.29662	0.146709	0.280378	1.32214	0.129719	0.850353
NR_135301.1	0.177608	1.65248	0.333508	0.780348	0.651218	0.355783	1.18914	0.357967	0.189077	1.57287	1.31115	0.277455	1.37614	1.25013	0.595165	0.315933	0.468805	2.04465	1.00909	0.299681
NR_126024.1	0	0	0	0	0	0	0	0	0	0	0	0	0	0	0	0	0	0	0	0
NR_027434.2	0	0	0	0	0	0	0	0	0	0	0	0	0	0	0	0	0	0	0	0
NR_111930.1	1.15233	1.00131	0.661056	0.343985	1.76488	0.443819	0.9036	1.28576	0.834052	1.02674	0.811998	0.802321	0.873247	0.81693	0.804831	0.303673	1.38228	1.1396	1.0889	1.52127
NR_027069.1	0	0	0	0	0	0	0	0	0	0	0	0	0	0	0	0	0	0	0	0
NR_103851.1	0	0	0	0	0	0	0	0	0	0	0	0	0	0	0	0	0	0	0	0
NR_037695.1	0	0	0	0	0	0	0	0	0	0	0	0	0	0	0	0	0	0	0	0
NR_136593.1	0.0583575	0.0617398	0.0373387	0.0786025	0.0256085	0.0513166	0.142496	0.050742	0.0780608	0.0989908	0.069216	0.0534264	0.035724	0.0244774	0	0.0372781	0.0839547	0.213681	0.0629791	0.0326507
NR_051986.1	0	0	0	0	0	0	0	0	0	0	0	0	0	0	0	0	0	0	0	0
NR_040025.1	0	0	0	0	0	0	0	0	0	0	0	0	0	0	0	0	0	0	0	0
NR_037850.2	0	0	0	0	0	0	0	0	0	0	0	0	0	0	0	0	0	0	0.0230333	0
NR_135482.1	0	0	0	0	0	0	0	0	0	0	0	0	0.377485	0	0	0	0	0.631404	0	0
NR_134559.1	1.36969	2.56871	2.29876	2.21857	2.36769	2.41776	2.59555	2.60421	2.84016	2.82865	3.22316	1.8983	2.63354	3.01947	4.56256	2.20588	1.79734	3.01429	4.0869	2.85316
NR_135283.1	0	0	0	0	0	0	0	0.182948	0	0.944968	0.275143	0.356545	0.250473	0.257784	0	0.386771	0	0.348535	0	0.190429
NR_135284.1	0	0.591675	0	0	0	0	0	0	0	0	0	0	0	0	0	0	0	0	0.443498	0
NR_046098.1	0.196264	0.244807	0.168456	0.308392	0.146622	5.97979e-06	0.260303	0	0.054012	0.176895	0.575309	0	0	0.317078	0	0.30147	0	0.530871	0.0755433	0.158619
NR_040092.1	0.904323	0.898815	0.791953	0.892215	1.38859	0.966084	0.492786	0.475656	0.880176	0.831928	0.648812	0.961555	0.65037	0.589928	0.921572	1.05459	0.972531	1.10711	0.826321	0.810187
NR_123723.1	0.919609	0.876606	1.66342	1.39026	0.815096	2.12749	1.65032	1.89978	1.77533	1.54107	1.63034	1.81155	1.3066	1.21107	1.31235	1.2616	2.26077	2.29436	1.7202	1.89031
NR_028492.1	0.192363	0.338061	0.189024	0.347976	0.0773329	0.208997	0.409333	0.127871	0.0884928	0.332132	0.372735	0.120979	0.337509	0.282404	0.124851	0.132549	0.199652	0.257703	0.196689	0.130866
NR_015419.2	0.225622	0.39573	0.289959	0.445786	0.328523	0.121237	0.533278	0.19417	0.234993	0.442341	0.606879	0.451665	0.365964	0.383354	0.167221	0.284849	0.353755	0.53503	0.172243	0.268089
NR_130894.1	0.104864	0	0	0	0	0	0	0	0	0	0.328332	0	0.149447	0	0.270238	0	0	0	0	0
NR_131903.1	0	0.676928	0	0	0.251981	0	0	0.161248	0	0	0	0	0.220487	0	0	0	0	0.614656	0	0
NR_046554.1	0	0	0	0	0	0	0	0	0	0	0	0	0	0	0	0	0	0	0	0
NR_110029.2	0	0	0	0	0	0	0	0	0	0	0	0	0	0	0	0	0	0	0	0
NR_047508.1	0.180815	0.196008	0	0.259481	0	0	0	0	0	0.729142	0.283068	0	0.257689	0.26521	0	0.198956	0	1.4343	0.29384	0.195914
NR_046988.1	0	0	0	0	0	0	0	0	0	0	0	0	0	0	0	0	0	0	0	0
NR_104244.1	0	0	0	0	0	0	0	0	0	0	0	0	0	0	0	0	0	0	0	0
NR_110152.1	0	0	0	0	0	0.105262	0	0	0	0	0	0	0	0	0	0	0	0	0	0
NR_126503.1	0	0	0	0	0	0	0	0	0	0	0	0	0	0	0	0	0	0	0	0
NR_134534.1	0	0.0613787	0.0634264	0.0812549	0	0	0	0	0	0.135449	0	0	0	0	0.0729573	0	0.0516926	0	0.0920144	0
NR_027489.1	0	0	9.15075e-10	1.37452e-07	5.54766e-08	0	0	2.64992e-08	0	0	0.691956	0	0	0.284154	0	0	0	0	0	0
NR_135630.1	0	0	0	0	0	0	0	0	0	0	0	0	0	0	0	0	0	0	0	0
NR_135051.1	0.0156196	0.016932	0	0	0	0.0135833	0.0754916	0	0	0	0	0	0.0890413	0	0	0.0360249	0.01426	0.0619508	0	0
NR_046667.1	0	0	0	0	0	0	0	0	0	0	0	0	0	0	0	0	0	0	0	0
NR_103790.1	0.695476	1.65753	0.97658	0.366501	0.921495	0.970005	1.32767	0.921581	0.994778	1.26615	1.44478	0.899495	1.29345	1.75288	0.738238	0.283451	1.30412	2.76064	1.29092	0.753583
NR_136286.1	0.512853	1.44999	0.760134	0.897213	1.36037	0.609225	1.22339	1.11093	0.768223	1.16463	1.04966	0.733748	1.12959	1.33735	0.849692	0.546191	1.13087	1.34338	1.00869	0.689057
NR_125396.1	0.394063	0.0795104	0.261794	0	1.23355	0.856725	0	0.448372	0	0.826939	0	0.399714	0.561599	0.396578	0.0472547	0.2168	0.0334815	0	0	0
NR_135079.1	0.584542	1.09384	0.802633	1.56831	0.31584	1.18612	1.0918	0.202825	0.637276	1.04764	1.0679	1.28467	1.26777	1.71475	2.0371	0.535991	0.53366	0.811688	1.13252	0.633354
NR_110415.1	0.112915	0.655306	0.179245	0.191905	0.163567	0.128219	0.341941	0.23364	0.247408	0.294035	0.204132	0.117983	0.65183	0.300769	0	0	0.13086	0.232777	0.349312	0.125216
NR_120421.1	0	0	0.24788	0	0	0	0.613191	0	0	0	0.111733	0	0	0	0	0	0	0	0	0
NR_120331.1	0.59158	0.697668	0.83659	0.608862	0.375346	0.172117	0.938643	0.396983	0.142403	0.450803	0.516792	0.200757	0.768229	0.434268	0.562776	0.217571	0.48627	1.06251	0.566974	0.214838
NR_121213.1	0	0	0	0	0	0	0	0	0	0	0	0	0	0	0	0	0	0	0	0
NR_130737.1	0.0532931	0.173925	0.033969	0.119748	0.0437567	0.0698834	0.410602	0.111876	0.043053	0.14344	0.209112	0.109768	0.0793381	0.119424	0.104446	0.0294467	0.0246619	0.265026	0.0923614	0.0866214
NR_110291.1	0.106045	0.731026	0.158387	0.61116	0.171895	0.155645	0.565914	0.136443	0.342564	0.510566	0.830076	0.0717106	1.5113	0.470569	0.813434	0.238791	0.101474	0.911294	0.86475	0.33552
NR_125400.1	0	1.17315	0.242458	0.93183	0.350847	0.376452	0.346518	0.225305	0	0.290938	0.338845	0.219547	0.925394	0.634937	0.557782	0	0.790413	0.858461	0	0
NR_131171.1	0	0.342168	0	0.0905946	0.10233	0.109799	0.101068	0.065714	0	0.084857	0.29649	0.128069	0.179938	0	0.0813431	0	0.0576343	0.125192	0.102591	0.068401
NR_125960.1	0.392162	0.595627	0.110695	0.310235	0.636619	0.285983	0.459159	0.300558	0.0154152	0.243928	0.254517	0.135757	0.0898103	0.41787	0.387198	0.464679	0.185493	0.469142	0.299877	0.30284
NR_110845.1	1.08677	2.36027	0.7811	2.20453	0.648097	1.49384	2.01469	1.73498	1.01416	3.21436	2.22049	1.15352	2.15165	0.919388	2.11611	1.44818	1.3176	2.01884	1.5458	1.1062
NR_110846.1	0.51681	0	0.978912	0	0	0	0	0.31363	0.734136	0.602814	0.406393	0.513284	0.905353	0	0.341254	0	0	0.843216	1.26404	0.24671
NR_126473.1	0	0	0	0	0	0	0.586193	0	0	0	0	0	0	0	0	0	0	0	0	0.396726
NR_110942.1	0	0.429198	0.00014641	0.00118102	0	0	5.04045	0.68254	0.964127	6.97345e-05	4.1544	0.279627	2.78947	2.58449	0	0.498572	0.857913	1.70292	0.178694	0.562784
NR_120559.1	0	0	0	0	0	0	0	0	0	0	0	0	0	0	0	0	0	0	0	0
NR_003683.2	0.11283	0.227994	0.282283	0.302825	0.0606414	0.225498	0.113106	0.107943	0.145719	0.414816	0.118774	0.406492	0.214875	0.208881	0.47069	0.184131	0.198334	0.286784	0.282974	0.126136
NR_125970.1	0.157484	0	0	0	0	0	0	0	0	0	0	0.159742	0	0.23099	0	0	0	0	0	0
NR_111915.1	0.0904545	0.258142	0.121475	0.315685	0.12434	0.220663	0.423392	0.115259	0.250253	0.442845	0.327564	0.121309	0.322989	0.291206	0.192606	0.112062	0.147679	0.327911	0.300964	0.115542
NR_126367.1	1.09046	1.01309	0	0	0.553355	0	0.71765	0.0170017	0.663875	0.625702	1.85991	0.265755	1.15888	2.78302	1.36707	0.711015	0	2.49663	0	0
NR_125911.1	0	0	0	0.190495	0	0	0.212517	0	0	0	0	0	0	0	0	0.292123	0	0.263244	0	0
NR_125974.1	3.15682	3.60934	3.94746	4.82489	3.12351	5.43847	5.17813	5.20691	7.33913	5.30937	4.43804	3.641	4.15259	3.54736	6.14484	4.82801	3.91864	5.56	8.60581	6.19445
NR_125808.1	0	0	0	0	0	0	0	0	0	0	0	0	0	0	0	0	0	0	0	0
NR_120475.1	0	0	0	0	0	0	0	0	0	0	0	0	0	0	0	0	0	0	0	0
NR_136218.1	0	0	0	0	0	0	0	0	0	0	0	0	0	0	0	0	0	0	0	0
NR_136219.1	0	0	0	0	0	0	0	0	0	0	0	0	0	0	0	0	0	0	0	0
NR_136220.1	0	0	0	0	0	0	0	0	0	0	0	0	0	0	0	0	0	0	0	0
NR_029426.1	0.646853	5.37	1.99173	4.49628	1.25892	0.878761	3.56428	1.93901	1.72303	4.11459	2.37668	1.35883	2.95202	4.41209	3.14968	1.64511	1.08336	5.23408	3.6404	1.42544
NR_110619.1	0.368856	0.629825	0.219443	0.952194	0.221123	0.179303	0.982823	0.515355	0.266423	0.72678	0.958756	0.429045	0.806049	1.02768	0.891238	0.235693	0.289105	1.20063	0.426574	0.275463
NR_125822.1	1.14738	2.78024	1.17188	1.30757	0.711125	0.528248	2.26913	1.01872	0.572321	1.08867	2.16606	0.547688	2.16423	2.2274	1.00011	0.854046	1.3556	2.14154	1.26135	0.877551
NR_130738.1	0.154711	0	0	0	0	0.134542	0	0	0	0	0.242203	0	0	0	0	0	0	0.306809	0	0.167631
NR_125930.1	0.103652	0.187224	0	0.346994	0.112025	0.0901178	0.276675	0.0359567	0.125533	0.0464312	0.432614	0.105195	0.147685	0.10133	0.356068	0.171037	0.0315462	0.47951	0.0561654	0.212946
NR_125931.1	0.176381	0.247893	0.274997	0.414225	0.338281	0.213771	0.373966	0.368712	0.275002	0.672188	0.272496	0.144005	0.359694	0.434073	0.855189	0.353022	0.199188	0.593353	0.624752	0.363571
NR_133003.1	0	0	0	0	0	0	0	0	0	0	0	0	0	0	0	0	0	0	0	0
NR_120374.1	0	0	0	0	0	0	0	0	0	0	0	0	0	0	0	0	0	0	0	0
NR_125796.1	2.01591	2.73724	1.35454	1.62271	1.18309	2.25968	2.44569	2.59465	2.8586	2.32284	2.12668	1.65393	1.88454	2.74854	1.83165	1.57409	2.0104	2.51609	1.40276	2.59024
NR_135178.1	0.22194	0.332688	0.0960003	0.452554	0.209376	0.200483	0.461445	0.16	0.123745	0.140616	0.269798	0.250753	0.682831	0.589889	0.331913	0.163053	0.20356	0.534886	0.31226	0.214878
NR_120486.1	0.111802	0.412193	0	0.160442	0.181226	0	0.53697	0	0	0	0	0.45362	0	0	0	0	0	0	1.09978	0
NR_120487.1	0	0.105523	0	0	0	0	0	0.165714	0	0.641962	0.498447	0	0.226878	0.2335	0.615379	0	0.145339	0	0	0
NR_120307.1	0	0	0	0	0.267751	0	1.03452	0.143946	0	0.444064	0.75147	0	0.470814	0.484557	0	0	0.301605	0.655141	0	0
NR_125345.1	0.0431411	0.215066	0	0.122197	0.146744	0.0370251	0.44911	0.178968	0.0522572	0	0.616001	0.0431862	0.123366	0.0636774	0.222136	0.142297	0	0.360736	0.560409	0.186188
NR_110883.1	0	1.28729	0	0.973804	0.549976	0.737643	2.17276	0	0.205505	1.82426	0.531163	0.172078	1.69239	1.99061	0.87436	0.186666	0.154878	0.672848	1.37844	0.183811
NR_126372.1	0	0	0	0	0	0	0	0	0	0	0	0	0	0	0	0	0	0	0	0
NR_126388.1	0	0	0	0	0	0	0	0	0	0	0	0	0	0	0	0	0	0	0	0
NR_126389.1	0.0243076	0	0	0.806078	0	0	0.972327	0	0	0	0	0	0	0	0.369985	0	0	0.422897	0	0
NR_126404.1	0.102597	0.331945	0.0896194	0	0.27235	0.0732809	0	0.101269	0.213288	0.166583	0.353441	0.206634	0	0	0.12035	0	0.109243	0	0.284896	0
NR_126469.1	0	0	0	0	0	0	0	0	0	0	0	0	0	0	0	0	0	0	0	0
NR_040057.1	0.180371	0.162254	0.121548	0.326637	0.0952645	0.0851679	1.18341	0.348838	0.21402	1.26031	0.264434	0.226208	0	0.313209	0.365426	0.147695	0.333573	0.958566	0.219389	0.342867
NR_132100.1	0	0	0	0	0	0.270035	0	0	0	0	0	0	0	0	0	0	0	0	0	0
NR_132381.1	0	0	0	0.21159	0	0.384664	0	0.15348	0.17861	0	0.230824	0.149557	0.210129	0	0	0.324473	0	0	0.239608	0.319511
NR_133675.1	0.210854	1.08456	0.428181	0.904794	0	1.29184	2.9784	1.00766	0.244537	5.2477	1.63259	0.598173	1.78517	1.19294	1.53789	0.725703	1.33124	2.1846	1.00854	0
NR_133664.1	0.154372	1.48726	0.627324	1.06149	0.637337	0.540144	2.40067	0.526579	0.3758	1.56751	2.08945	0.334857	1.10678	1.21096	1.37862	0.754526	0.995837	1.67058	0.909711	0.502309
NR_133911.1	0.953342	3.32589	1.82329	4.11285	0.776151	1.16401	4.21047	1.43584	2.12413	3.81668	2.33544	1.28789	3.17939	4.02941	6.57223	2.02243	0.162884	2.60583	7.87517	0.252521
NR_133677.1	0	0	0	0	0	0	0	0	0	0	0	0	0	0	0	0	0	0	0	0
NR_132748.1	0	0.0234399	0	0	0	0	0	0	0	0	0	0	0	0	0	0	0	0	0	0
NR_135071.1	0	0	0	0	0	0	0	0	0	0	0	0	0	0	0	0	0	0	0	0
NR_132999.1	0.609002	3.85927	0.624767	2.643	0.61378	0.833117	2.8752	0.86481	1.45576	2.26262	2.93193	0.640467	3.44433	2.98376	2.59114	0.875213	0.628819	3.5657	2.76091	1.25709
NR_133000.1	0.561428	0	0.412735	0	0	0	0	0	0	0	0	0	0	0	0	0	0	0	0	0
NR_133682.1	0	0.237975	0	0.135309	0.152837	0.0899835	0	0.098148	0	0.126739	0.295217	0.0956397	0.134374	0.276593	0.121491	0	0.0925382	0.186982	0.153226	0.102161
NR_109979.1	0	0	9.32907	4.51994	27.8699	17.1084	0	13.666	0.764184	0	0	2.51288	3.81836	5.39808	6.1998	3.42904	2.64843	0	3.96115	5.23488
NR_073383.1	0.0375427	0.225656	0.0422768	0.108753	0.0618242	0.0489611	0.273375	0.0387814	0.0688727	0.406609	0.327724	0.0572085	0.458766	0.333011	0.26698	0	0.017094	0.376414	0.306882	0.0406719
NR_015446.1	0	0.133778	0.0417976	0.0556893	0.143545	0.0324533	0.285312	0	0.0480964	0.351861	0.0702889	0.106625	0.233492	0.0669476	0.110512	0.0409107	0.0532338	0.31109	0.168387	0
NR_003571.1	0.354789	0.249058	0.363995	0.460701	0.324637	0.482891	0.515915	0.380723	0.626875	0.688946	0.15945	0.568846	0.411605	0.686644	0.610596	0.691552	0.637911	0.694413	0.749645	0.587138
NR_137433.1	0.513418	7.64094e-08	0.670817	0	0.12731	0.440374	0.435835	0.34459	0.820441	0.384939	0.369134	0.571356	0.571544	0	0.663062	0.0666194	0.673563	0.71934	0.561476	0.360347
NR_137434.1	0.292963	0.476762	0	0.43978	0	0.0101437	0.0518936	0.379362	0	0.35607	0	0	0	0	0	0.117805	0	0	0	0
NR_033735.1	0	0	0	0	0	0	0	0	0	0	0	0	0	0	0	0	0	0	0	0
NR_137435.1	3.81048e-10	0.000199783	0	0	0.000106511	2.24576e-09	6.6417e-05	1.0814e-05	0.000326413	0.000216611	4.96472e-05	0	0	0	0	0	0	0.00023724	5.61291e-05	8.91398e-05
NR_137436.1	0.499449	0.961988	1.37361	0.743036	0.514919	0.0431731	1.31151	0.856143	0.50149	0.296128	1.21089	1.1353	1.33888	0.772769	0.923596	1.16959	0.936874	1.28687	0.405589	0.296166
NR_137431.1	0	0	0	0	0	0	0	0	0	0	0	0	0	0	0	0	0	0	0	0
NR_137432.1	0	0	0	0	0	0	0	0	0	0	0	0	0	0	0	0	0	0	0	0
NR_137429.1	0	0.204591	0	0	0.361999	7.22116e-09	9.23784e-08	0	0	0	0.328171	0	0	0.487322	0	1.00736e-07	0	0	0	0
NR_137430.1	0	0	0	0.222215	0	0.0369985	0.174066	0	9.98921e-09	2.60423e-05	0	0	0.00878876	0	0	0.422546	0	0	0	0
NR_034156.1	0	0	0	0	0	0	0	0	0	0	0	0	0	0	0	0	0	0.104854	0	0
NR_137294.1	63.1232	13970.2	448.155	22693.1	668.181	137.731	18811.4	145.59	516.494	14225	20705.1	255.433	15046.3	21069.8	6783.23	3608.93	166.333	18739.5	8345.34	203.366
NR_137295.1	269.199	44389.6	2376.87	84008.1	3350.27	662.393	82987.3	471.725	2311.15	53468.1	123577	1472.6	50266.4	74933.2	34366.9	6208.45	764.868	97398.3	41755.3	882.597
NR_104121.1	0	1.05198	0.119935	0.160941	0	0.471018	0.0105408	1.28174	0.0262802	1.34722	3.16763	0.432284	0.621169	2.37648	0.632567	0.532271	0.000332691	4.80936	1.72774	0.104688
NR_137639.1	56.5439	31.5014	48.2327	34.9117	58.6111	43.6569	35.4033	34.3508	44.0967	42.6672	18.5667	38.4364	42.109	27.6575	35.0188	48.5049	44.0559	42.1611	11.3286	42.295
NR_135168.1	29.1867	39.4137	40.1031	26.3896	53.447	25.2325	47.2852	26.4615	28.0497	63.5436	33.326	22.1791	33.4982	35.3626	31.493	37.0223	36.6305	60.2342	42.8029	25.8904
NR_125371.1	31.7537	31.7125	37.2043	26.2369	41.775	34.2344	22.2536	34.3149	32.7996	31.5988	21.4357	24.2944	24.6955	25.4631	24.8855	28.3583	47.1406	25.3839	19.5502	27.8848
NR_003655.3	0.517575	0.9638	0.700997	1.04118	0.477718	0.662716	0.750969	0.762985	0.645741	0.850363	1.00592	0.684758	1.02864	1.22659	0.806311	0.593418	0.746391	1.38619	1.01408	0.782103
NR_138027.1	1.91342	1.44007	2.98808	1.73387	0.454448	1.70277	0.817823	2.83071	1.5658	0.408406	0	2.57869	1.44646	0.872189	2.27115	0.952728	1.25599	0.633242	1.1639	2.03101
NR_138024.1	0.487729	0	0	0	0	0	0	0	1.20859	0.610572	0	0	0.76793	0	0	0	0.500037	0	0	0
NR_138025.1	0	4.16309e-07	0	0	0	0	0	0	0	0	0	0.424893	0	0	0	0	0.894375	4.20494	0.0163645	0
NR_138026.1	0.588186	3.77556	3.00074	0	3.55384	1.00447	0	1.98532	0	2.82427e-07	8.37872	0.996182	0.29778	0	3.2222	2.69738	1.153	7.36454	1.81869e-05	2.58568
NR_138028.1	0.00544203	0.0688513	0.0547498	0	0.126935	0.000696472	0	0.0267979	0	0	0	0.0150383	0.0027856	0	0.0485214	0.0485102	0.00769448	0.190944	1.1995e-08	0.0187452
NR_138046.1	0.000162161	4.72718	0.302796	6.46408	0.368377	1.47657	2.09575	0.888496	0.623216	0.521014	5.17006	0.240562	4.19325	7.72934	9.05012	1.69762	0.514388	4.84876	1.92631	0.603604
NR_138045.1	0	0	0	0	0	0	0	0	0	0	0	0	0	0	0	0	0	0	0	0
NR_138043.1	0	0	0	0	0	0.0459221	0	0.0558779	0	0	0	0	0	0	0.068873	0	0	0.104979	0	0
NR_138049.1	0.840259	7.28688	0	0	0	0	1.34522	0	0	0	0	0	1.19749	1.23245	2.16537	0	0.767118	1.66632	1.36549	0
NR_138042.1	0	0.0763777	0.0499628	0.0797796	0	0.0284706	0.0851569	0.0170627	0.0197908	0.115202	0	0.0388254	0.0654288	0.0116443	0	0	0.0379806	0.0839306	0.0279045	0.0180456
NR_138052.1	6.6466e-11	0.00321923	0.00262992	0.0277631	3.72109e-05	5.67674e-09	0.350305	0.70911	1.52957e-08	0.646525	0.471695	0.298846	0.268935	1.33336	0.00215734	7.58695e-06	0.319122	1.5669	1.93569	0.00653522
NR_138055.1	0.760577	0.412	0.12332	0.462635	0.428441	0.53979	0.126632	0.311201	0.968282	0.359881	0.118152	0.826281	1.38776e-06	0.137182	1.43156	0.0634756	0.475337	0.951528	0.180587	0.580509
NR_138029.1	0	0.468699	0.279528	0	0	0.68728	0	0.375094	0.503645	0.231515	1.00074	1.03199	0.942783	0.0608732	0.320864	0	0.000118584	0.0264512	0	0.358791
NR_138070.1	0.998039	17.0851	1.35996	12.4447	1.81507	1.2278	14.152	0.928719	0.843618	10.6513	13.9269	0.738259	17.2834	19.0413	3.04246	1.39281	1.24746	16.8925	4.35144	0.87038
NR_138080.1	0	0	0.743109	0.58653	1.05378	0	0.572344	0.454049	0	0.885967	1.58002	0.719968	0.946036	0	0	0	0.336885	0	0	0
NR_138053.1	0.732283	1.76675	0.801131	1.58109	0.958958	0.833614	1.7539	0.00573312	0.689758	1.51168	1.42358	0.391084	1.26596	0.0997278	1.89107	0.724809	0.422541	0.883153	0.408456	0.802812
NR_003078.1	0	0	0	0	0	0	0	0	0	0	0	0	0	0	0	0	0	0	0	0
NR_002743.2	0	0	0	0	0	0	0	0	0	0	0	0	0	0	0	0	0	0	0	0
NR_135467.1	6.73322	8.87609	4.54985	6.29673	8.48738	6.05681	7.19738	5.90276	4.10596	5.54448	3.95549	12.3873	9.59767	9.43421	2.40138	4.2599	11.3277	6.09265	2.93688	5.84453
NR_104472.1	4.99692	4.2239	6.7373	2.73086	13.152	7.56898	6.2832	2.33689	3.57965	2.58676	4.66211	4.83682	4.42725	7.13879	1.22785	5.4136	8.22591	7.78685	5.17755	9.60734
NR_138083.1	0	0	0	0	0	0	0	0	0	0	0	0	0	0	0	0	0	0	0	0
NR_001538.2	0	0	0	0	0	0	0	0	0	0	0	0	0	0	0	0	0	0	0	0
NR_138096.1	0	0.117171	0.0605399	0	0	0	0	0	0	0	0	0	0.0770213	0.0792695	0.0696369	0	0	0.214351	0	0.0585574
NR_138081.1	4.86381	8.83083	5.86893	6.37007	4.77432	6.64028	5.52658	6.71786	3.05422	8.30138	6.58539	4.76307	13.0629	13.0595	3.88801	2.74509	8.18768	19.5446	2.65091	5.00502
NR_138136.1	0.251712	0	0	0	0.460811	0	0.0204112	0	0	0	0	0	0	8.17426e-06	0	0	0	0	0	0
NR_134486.1	1.4442	4.43759	2.73959	0.00209806	3.84212e-08	0.00256515	2.06428	0	0	0	2.47462	2.7926	0.310862	1.40432	0.00927402	0.00855711	0	0	0	0
NR_134487.1	4.09714	0.757471	4.59699	0.228275	2.50649	9.83632	0.754564	4.64782	10.2796	1.38225	3.07153	2.97651	4.65163	0	2.15547	4.91227	5.22198	0.833865	4.88026	6.33749
NR_138132.1	0.589276	0.711744	0.686436	0.24539	1.20485	1.19752	3.10271e-07	0.478014	1.33514	0	1.05158	1.63115	0.933299	1.73916	3.65123e-06	0.740283	0	0.963539	1.30728	0
NR_138131.1	0.17763	0	0	0	0	0.121667	0	0	0	0.40334	0.347278	0	0	0.263003	0	0.385553	5.63709e-10	0	0	0
NR_138133.1	0	1.39402	0	0.710295	0.191475	0	0.575881	0	0.00144334	0	0.375089	0	0	0.549287	0	0.458944	0	1.71061	0.335722	0
NR_138140.1	0	0.000708188	0	0	0	0	2.81741e-06	0	0	0.567983	0.60114	0	0	0	0	0	0	0	0	0
NR_103739.1	0.684594	0.710237	0.684091	0.000263412	0.433641	0.713286	1.45076e-05	0.296006	0.82239	0.304084	0.808621	0.445061	1.02997	0.349709	0.75823	0.817605	0.602621	0.973792	1.1948	0.914518
NR_033423.1	0	0	0	0.0951816	0	0	0	0	0	0	0	0.0670644	0	0	0	0	0	0	0	0
NR_138137.1	0.117614	0	0	0	0.254594	0	0	0	0	0	0	0	0	0	0	0	0	0	0	0
NR_138138.1	0	0.784013	0.585851	0.699664	0	0.31908	1.43518	0.53061	0.428249	0.173042	0.16414	0	0	0.826645	0.812794	0.275253	0.642081	1.19826	0.400367	0.599203
NR_138139.1	0	0.333475	0	0.290393	0	0	0	0.0649186	0	0.756059	0.843996	0.696736	0.889667	0	0	0.410999	0	0	0.334475	0
NR_138146.1	0.536774	0	0	0	0	0	5.26537e-09	0	0	1.31991	0	0	0	0	0	0	0	0	0	0
NR_138152.1	0	0	0	0	0	0	0	0	0	0	0	0	0	0	0	0	0	0	0	0
NR_138153.1	0	0	0	0	0	0	0	0	0	0	0	0	0	0	0	0	0	0	0	0
NR_138154.1	0	0	0	0	0	0	0	0	0	0	0	0	0	0	0	0	0	0	0	0
NR_138249.1	0	0	0	0	0	0	0	0	0	0	0	0	0	0	0.0232887	0	0	0	0	0
NR_138255.1	0.191018	0	9.31527e-07	0	0	0	0	0	0	6.89594e-08	0	0	0	0	0	0	2.8101e-06	0.00160684	0	0
NR_138256.1	0.139773	0	3.25733e-07	0	9.98247e-10	0	0	0	1.27036e-05	0	0	0	0	0	0	0	1.21409	0.000667805	2.33224	0
NR_138424.1	1.37823e-08	1.02401e-08	0	1.86781e-08	0	0	0.00111353	0.151032	0	0	0	0	0	0	0.000122718	0	0	0	0.149863	0
NR_138425.1	0	2.61538e-07	0	0	0	0	0	0	0	0.177007	0	0	0.89901	0	0.773369	0	0	0	0	0
NR_138422.1	0	0.655027	0.179773	0.796132	0	1.05841e-06	0.211447	0	0	0	0	0.123053	0	0.498056	0.296409	0.213495	0	0	0	0
NR_138426.1	2.58833	2.09502	1.8184	2.02037	2.84095	1.5457	0.715095	1.26075	1.8512	1.25344	1.11775	1.1215	0.472747	0.699639	2.05767	1.77778	1.51198	2.47875	1.9325	0.91945
NR_138423.1	0.325718	1.83271	0.438921	1.77969	0.172886	0.350364	1.01004	0.131826	0.182948	1.46953	1.8318	0.135197	1.37117	2.37109	0.29422	0.366158	0.181833	1.98826	0.881898	0.255697
NR_138421.1	0.133863	1.87707	0.170767	0.603959	0.307459	0	0.685216	0	0.113193	1.21128	0.685963	0.159874	0.253523	0.971773	1.15429	0.205478	0.0796917	1.23261	1.19842	0.195817
NR_138427.1	0	0.125686	0	0.181568	0	0.132456	0	0	0	0.132191	0.426674	0.108266	0.332877	0.110439	0.357626	0	0	0.158819	0	0
NR_110899.2	0	0	0	0	0	0	0	0	0	0	0	0	0	0	0	0	0	0	0	0
NR_110370.1	0.551919	6.83107	0.633092	5.33047	0.680115	0.294641	7.43629	0.46354	0.510352	4.35876	9.02104	0.329594	7.77715	10.013	1.23501	0.314358	0.577794	8.32023	2.24432	0.42951
NM_207127.2	0	0	0	0	0	0	0	0	0	0	0	0	0	0	0	0	0.069945	0	0	0
NM_207128.2	0	0	0	0	0	0	0	0	0	0	0	0	0	0	0	0	0	0	0	0
NR_109764.1	0	0	0	0	0	0	0	0	0	0	0	0	0	0	0	0	0	0	0	0
NR_138459.1	0.317696	0.971833	0.442757	0.591824	0.307998	0.4498	0.96213	1.05138	0.378076	1.40806	0.668221	0.86117	0.750984	1.01729	0.827667	0.383643	0.645003	0.63055	0.517204	0.48229
NR_109766.1	0	0	0	0	0	0	0	0	0	0	0	0.0675275	0	0	0	0.146504	0	0	0	0
NR_109765.1	0	0	0	0	0	0	0	0.0559132	0.0650683	0	0	0	0.0765505	0.15757	0	0	0	0.213041	0	0
NR_138419.1	0	0	0	0	0	0	0	0	0	0	0	0	0	0	0	0	0	0	0	0
NR_036575.1	0	0	0	0	0	0	0	0	0	0	0	0	0	0	0	0	0	0	0	0
NR_103475.1	0.376453	0.261713	0	0.886652	0.432738	3.36026e-10	0.0166549	0	0.303795	5.72876e-07	0.275898	0.417051	0.643021	0.675476	0.0782332	0.276265	0.694324	1.14423	0.144155	0.908864
NR_036461.1	8.80629	42.5412	27.0489	42.9407	19.8959	17.6035	42.7603	31.5727	8.83533	46.9134	54.3358	22.2748	46.2519	55.3111	10.7336	7.59305	33.7246	41.3389	15.9491	16.5245
NR_027337.1	0	0.419906	0	0	0.0376502	1.23644	0	0	0	0	0	0.13707	0	0	0	0	0	0	0	0
NR_045125.1	0	0	0	0	0	0	0	0	0	0	0	0	0	0	0	0	0	0	0	0
NR_110315.1	0	0	0	0	0.120523	0.113637	0	0	0	0.174642	0	0	0.167279	0	0	0.0159321	0.0627995	0.0792321	0.17766	0
NR_104261.1	0	0.0557074	0	0	0	0	0	0	0	0	0	0	0.0328878	0	0.0662162	0	0	0	0.0750033	0
NR_138468.1	0	0	0	0	0	0	0	0	0	0	0	0	0	0	0	0	0	0	0	0
NR_133673.1	0	0	0	0	0	0	0.951576	0	0.330603	0	0	0	0	0	0.838775	0	0.26992	0	0	0
NR_138467.1	0	0	0	0	0	0	0	0	0	0	0	0	0	0	0	0	0	0	0	0
NR_033193.1	1.16404	3.1344	0.335752	1.07887	3.37351	1.91584	1.56343	1.76044	1.91799	2.48479	2.20704	1.6136	3.17704	0.944881	0.503743	2.88761	2.45074	2.37807	1.92564	3.31004
NR_033195.1	8.19175	12.6099	2.12111	2.89852	11.7475	7.02585	15.2592	9.51692	4.69757	5.56029	15.729	7.01959	2.68119	3.3099	6.80953	2.39525	5.29573	0.00011435	7.00699	2.54248
NM_001162491.1	0.0527468	0.0571787	0	0	0	0	0.168891	0	0	0	0.0825758	0.0535031	0	0.00739221	0.13593	0.0580389	0	0	0	0
NM_024114.3	0	0	0	0	0	0	0	0	0	0	0	0	0	0	0	0	0	0	0	0
NR_024581.1	1.94704	1.45988	2.23694	4.23412e-05	0	1.39747	6.84339	1.00204	2.07645e-09	0.397752	9.03688	0.967111	1.58398e-09	3.68648e-09	0.0134009	1.21002	0.000160318	3.71251	0.547627	0.615407
NR_037675.1	5.89264	8.01868	5.46628	3.95069	4.40301	5.71576	3.73857	3.61036	4.82965	5.77558	6.74245	3.11871	4.01168	2.00942	6.18115	6.91369	6.05275	6.62659	3.09597	2.49997
NR_023319.1	2.48236	6.16724	0.995794	6.17041	3.22201	1.25503	7.59793	2.98342	1.95802	13.2983	5.15484	0.471428	6.41684	6.27215	15.2272	1.98882	3.14248	8.07615	9.48879	3.04957
NR_037164.1	1.18277	3.73221	2.68873	2.23712	2.60854	2.35818	1.89386	1.63937	1.00699	1.11139	4.92112	2.28708	2.18327	3.92563	6.45517	4.85936	0.707571	1.77171	2.6051	3.95245
NR_023361.1	2.40404	4.86693	2.74819	2.18392	2.93754	2.48477	3.26003	3.29936	2.26207	1.92799	2.62375	1.49784	2.61655	3.48884	1.24509	1.31616	2.28687	1.11712	1.19216	3.23947
NR_026895.1	0	0	0	0	0	0	5.89984e-06	0.536384	1.10284	1.88354	0	0	0	0	0.52576	0.137887	0.35746	0	0.200335	0
NR_030722.1	1.4204	0	0	0.00122483	0	2.0708e-09	0.729594	0	0.000357903	0.000166288	0.650906	5.82006e-10	1.21987	1.54632	0	1.40559e-09	0	1.97309	3.14922e-07	0
NR_027450.1	0	0	0	0.0588175	0	0	0	0	0	0	0	0	0	0	0.0689422	0	0	0	0	0
NR_003494.1	2.68856e-05	0	1.02553	1.9876	0	0.0067424	0	0	1.34131	0.151483	0.305705	0.120354	0	1.82905	0	1.08518	0.686149	4.28266e-05	0	0.172941
NR_033344.1	0	0	0	0	0.338963	0.254552	0	0.260435	0.421389	0.277338	0	0	1.2573e-07	4.06494e-10	0.495535	0	0	1.0411	0	0.43478
NR_024188.2	0	1.10181	1.26204	0.867647	0	1.66476e-10	8.17481e-08	0	0	1.18688	5.24427e-08	1.52592	0.953607	1.71793e-08	2.25526e-08	0.806958	1.04495	1.92219e-07	0	0.696347
NR_024546.1	0	0	0.866049	0	0	0.916853	0	0.614572	0	0	0	0	0	0	0	0	0	0.721346	0	0
NR_023318.1	1.15571	4.9325	2.0155	2.24415	0.920571	2.18771	2.96491	2.22367	1.34929	0.232666	3.18145	1.91363	4.45179	3.38657	5.05881	1.75511	0.868319	2.21248	1.87914	1.12539
NR_002158.1	0	0	0.959168	0.191662	0.851879	0.451637	0.27224	0.298908	0.0746366	0	0	0	0.0757295	0	0	0	0.250545	0	0	0
NR_002942.1	0	0	0	0	0	0	0	0	0	0	0	0	0	0	0	0	0	0	0	0.0236616
NR_024523.1	0.0387852	0	0.195225	0.0286886	0.0945887	0.0679324	0.0318572	0.0606363	0.0235655	0.0511171	0.158124	0.0400536	0	0.0872266	0.100102	0	0.0178379	0.0693256	0.031249	2.59242e-08
NR_024524.1	0	0	0	0	0	0	0	0.0182948	0	0	0	0	0	0	0	0.0193386	0	0	0	0
NR_002165.1	0.422238	1.11678	0.457703	0.558683	0.780086	0.420022	1.98898	0.730854	0.536417	3.38789	2.35892	0.709826	0.70405	1.4435	0.85179	0.519785	0.586397	2.51532	1.35829	0.119931
NR_022014.1	0.125718	0.0709926	0.173069	0.0460971	0.10307	0.080941	0.0513671	0.0649192	0.152356	0.129922	0.203116	0.125464	0.0461061	0.0472681	0.0399297	0	0.115203	0.260008	0.15374	0.0678766
NR_002145.1	0	0	0	0	0	0	0	0	0	0	0	0	0	0	0	0	0	0	0	0
NR_026541.1	0.56628	0.856737	0.755738	1.31204	0.547257	1.14521	0.97984	0.954526	1.44374	0.768567	1.68556	0.949209	0.945757	1.12902	2.62349	0.898129	0.835393	1.20634	1.6331	1.36391
NR_027486.1	0	0	0	0	0	0	0	0	0.0157344	0	0	0	0	0	0	0	0	0	0	0
NR_027408.1	0	0	0	0	0	0.0997407	0	0	0	0	0	0	0	0	0	0	0	0	0	0
NR_002169.1	0.0640497	0	0	0	0.103822	0.120632	0	0	0	0.086094	0	0	0	0	0.0825289	0	0.0584744	0	0.104086	0.138796
NR_003024.1	0	0	0	0	0.105045	0.112505	0.104937	0	0	0	0	0.131163	0	0	0	0	0.118525	0	0	0
NR_002157.1	0.817016	0	0	0	0.343691	0	0.114149	0	0.0157655	0	0	0.38808	0	0.101592	0	0.185391	0	0	0	0
NR_002140.1	0.0490526	0	0	0.112415	0.102688	0	0.285601	0.0545255	0	0.201743	0.58089	0.0822628	0.10122	0.117646	0	0.0694836	0.0606371	0.178705	0.186786	0
NR_026540.1	0.0533795	0.107952	0.0628333	0	0.0765716	0.090166	0.0592526	0.192783	0.111301	0.0618702	0.159149	0.0427886	0.051815	0.124811	0.113021	0	0	0.230257	0	0.0956814
NR_033769.1	0	0.22066	0.0790004	0.295265	0	0.0612928	0.108694	0.0744718	0.0415369	0.227971	0.0530768	0.0699106	0.0961169	0.300385	0.135325	0.07617	0.0311392	0.203244	0	0
NR_026564.1	0.118014	0	0.182922	0.445619	0.188704	0.0502205	0.154646	0	0.229285	0.122971	0.275546	0	0.154706	0.203354	0.30961	0	0.0994753	0.250265	0.503838	0.251755
NR_138475.1	0.97045	5.9364	4.19764	5.98629	3.37984	2.40316	2.54034	3.36677	2.36155	2.27734	6.75702	9.29158e-05	4.62853	4.83552	4.53875	0.401506	2.22121	9.69759	4.82282	2.79695
NR_104470.2	2.14999e-07	0	0.0806963	0	0.14191	0.167133	1.02083e-06	1.7401e-08	0.0069739	1.10765e-10	0	0.000807309	0	0	0.625116	5.05249e-05	0	0	6.45088e-05	6.95743e-06
NR_110171.1	0.529281	2.77616	2.0345	0.91272	3.22429	1.20884	4.849	2.11567	2.46653	2.40825	3.37277	1.93373	2.80983	3.19271	2.01704	1.15286	2.24943	2.32431	2.30448	2.1158
NR_046335.1	4.20431e-10	2.11726e-05	7.50262e-06	9.06837e-06	0	3.79117e-06	3.33078e-05	2.15525e-05	1.79815e-08	2.41548e-10	2.41907e-05	8.49038e-05	0.00119349	6.24974e-08	0	0	0.0169358	4.72194e-09	2.41424e-07	0.9107
NR_046336.1	0.142679	2.59097	0.17228	0.532187	0.439412	1.0876	1.36636	0.468328	0.808898	0.650486	1.33491	0.799466	1.5519	0.889973	0.681281	0	0.39036	0.983842	0.855586	0.291468
NR_046327.1	0	0	0	0	0	0	0	0	0	0	0	0	0	0	0	0	0	0	0	0
NR_024016.2	0	0	0	0	0	0	0	0	0	0	0	0	0	0	0	0	0	0	0	0
NR_033761.1	0	0.337962	0	0	0	0.150662	0	0	0	0	0	0	0	0	0	0	0	0	0	0
NR_104022.1	0	0	0.9975	0	4.20082e-07	0.0118365	2.29597	0.244367	0.00486239	7.98968	0	0	0	0	0	4.09838e-06	0	5.86682e-05	4.21286	0.00523619
NR_110290.1	0	0	0	0	0	0	0	0	0	0	0	0	0	0	0	0	0	0	0	0
NR_072989.1	0	0.105201	0.0470184	0.19019	0	0.124764	0.140444	0.0896772	0.156447	0.124515	0.0723901	0.0850047	0.277155	0.191442	0.240038	0.1421	0	0	0.174827	0.0457101
NR_046051.1	0	0.216499	0	0	0	0	0.319741	0	0.241936	0	0	0	0	0	0	0	0	0	0	0
NR_109913.1	0	2.916e-08	0	0	0.464549	0	0	0	0	0	0	0	0	0	0.417377	0	0	9.17488e-05	0	0
NR_047665.1	6.52584	9.77327	8.6286	6.40279	6.6519	8.67349	5.20616	8.14029	7.92216	7.73689	7.57368	9.89933	8.86319	5.69358	8.0232	9.65385	9.47663	12.7626	7.79248	9.63785
NR_046052.1	0	0.811683	1.01568	0.268995	3.29437	0.457812	1.4805	1.35432	1.26029	0.330828	2.06598	0	2.40387	3.58802	0	0.221191	3.67029	2.04354	0	4.49243e-07
NR_047666.1	1.23171	1.22978	1.18686e-05	0.012139	3.28444e-10	5.51628e-06	0.000768174	2.38566	0.354165	0.107638	1.15149e-06	2.42678e-10	3.47878e-07	0.00856928	3.34844e-07	4.10928e-08	0.049972	4.40497	0.0551174	3.52145
NR_073153.1	0	0	0	0	0	0	0	0	0	0	0	0	0	0	0	0	0	0	0	0
NR_051978.1	2.60446	2.94719	3.46469	1.92588	1.02451e-07	3.15468	4.2962	2.6547	2.54233	3.95204	2.33758	4.29292	0.936568	1.44086	4.28388e-05	5.89687e-05	3.40378	0.437045	1.86194	4.47948
NR_104627.1	0.195037	2.59845e-05	0.00890979	2.62548e-05	4.40158e-07	0.194985	0.430194	0.0533044	0.00635108	1.73978e-07	0.00624698	0.144846	0.00607065	0.678506	0.0057625	0.21085	0.00314666	0.808033	0.0612242	0.771777
NR_049739.1	0	3.10225	0	1.34923	0	0	1.04988	0	0	1.89458	0.996605	0.244085	0	1.12661	0	0	0	0.695269	0.607732	0
NR_037628.1	0	0.201646	0	1.82659	0.345041	0	0	0.250232	0	0	0.353092	0.579124	0	0	1.81611	0	0	0.396041	0.752276	0
NR_073152.1	0	0	0	0	0	0	0	0	0	0	0	0	0	0	0	0	0	0	0	0
NR_073052.1	2.06156e-09	0.67765	0	0	0	0.499565	0.90907	0	0.00113999	3.47582	1.20596	0	2.02416	0.000787966	0	0	2.40247e-06	0.00097836	0.000102356	0
NR_073047.1	4.54446	7.26541	4.28044	1.71974e-06	3.09711	4.78438	4.03426	6.99311	0.818917	3.28591	1.49403e-06	1.02023	5.41907	3.60853	0	2.71411	4.88963	2.60711	0.228637	3.624
NR_104023.1	0.279559	4.41069	0.278891	1.86265	1.87478	0.646206	2.78993	0.259135	0.446811	2.00772	1.4879	0.677786	3.04629	4.97236	3.07634	0.908564	0.183431	5.38138	1.82061	0.402314
NR_103708.1	0	0	0	0	0	0.0753647	0	0	0.052491	0	0	0	0	0	0	0	0.0791192	0	0	0.0469498
NR_073049.1	0	0	0	1.85862e-06	0	0	0	0	2.91069e-07	0	0	0	0	0	0	0.584521	0	0	0	0
NR_110172.1	2.76368	2.48526	3.15054	2.32799	3.07422	2.47598	2.20614	2.38292	2.47773	1.13436	1.30722	2.24233	4.63785	2.98433	1.56209	2.72069	3.23134	4.63677	1.5443	1.35246
NR_049738.1	5.66105	4.13658	4.62126	1.50043	7.45595	3.76538	2.27841	5.46728	4.22966	1.337	6.77081	1.94637	6.90342	4.15102	5.15014	3.26495	4.51574	4.70923	0.824365	3.43988
NR_110173.1	3.81223	1.89519	0	3.28621	1.32845e-06	1.47066	1.26215	1.82848	2.81319	0.612629	0.591261	4.69073	0.130136	0.773912	0.251392	3.53694	3.21972	0.749876	1.20631	4.36358
NR_073403.1	4.36342	4.63297	4.47188	2.1902	6.91899	1.71975	4.5879	5.91168	2.81806	3.93664	8.8754	4.50033	5.609	5.06938	2.71732	0.946326	6.65675	6.678	2.56924	6.82388
NR_103512.1	0	0.136777	0	0	0	0.217702	0	0	0	0.335617	0.355558	0	0	0	0.698907	0	0.217224	0	0.258569	0.14165
NR_102390.1	0	0	0	0	0	0	0	0	0	0	0	0	0	0	0	0	0	0	0	0
NR_052026.1	0	0	0	0	0	0	0	0	0	0	0	0	0	0	0	0	0	0	0	0
NR_103709.1	0	0	0	0	0	0	0	0.0737693	0	0.0476294	0	0	0	0	0	0	0	0	0	0
NR_104448.1	0	0	0	0	0	0	0	0	0	0	0	6.1128e-06	0	0	0	0	0	0	0	0
NR_046329.1	0	0	0	0	0	0	0	0	0	0	0	0	0	0.0953015	0	0	0	0	0	0
NR_037860.1	0	4.88771	0	3.02328	0	0.907244	1.49556	0.368103	0	1.89808	4.53137	0	7.55167	0	0	0	0	5.02085	1.58694	0
NR_003921.1	0	0	0	0	0	0	0	0	0	0	0	0	0	0	0	0	0	0	0	0
NR_034169.1	0.443415	0	0	0.290074	0.467452	0.690461	0.742115	0	0	0	0.305842	0	0.349173	0.312409	0.298883	0.298361	0.428517	0	1.34693	0.421241
NR_024593.1	0.0739948	0.313992	0.131895	0.216011	0.0822265	0.0888602	0.302811	0.191194	0.149628	0.330921	0.367715	0.165041	0.313305	0.375405	0.244348	0.123073	0.126775	0.601634	0.282153	0.0965707
NR_036476.1	0.237234	0.455097	0	1.93816	0.875679	0.643511	0.536472	0.374893	1.18811e-07	0.390341	0.584596	1.11091	1.02783	1.11352	0.937346	0.00127808	0	1.57906	0.217123	1.17067
NR_046417.1	0	0.0538473	0	0.0367708	0	0	0.0420081	0	0.0305262	0	0.0394505	0.0251854	0.155632	0	0	0	0.0226119	0.0494546	0	0.0313728
NR_024254.1	0.703366	1.24164	0.75567	0.947485	0.776795	0.606545	0.759582	0.500874	0.742327	1.39462	0.985579	0.782779	1.06716	1.14091	1.25054	0.512832	1.5343	1.15372	0.646786	1.03241
NR_033866.1	0	0	0	0	0	0	0.481802	0	0	0	0	0	0	0.441411	0	0.33114	0	0	0.489063	0
NR_002185.3	0.0459603	0.049822	0	0	0	0.0399685	0	0	0	0.0617788	0	0	0	0	0.118441	0	0	0.0911441	0.0746895	0
NR_024252.1	0.171386	1.12192	0.265894	0.753353	0.120008	0.364106	0.975974	0.183644	0.251465	0.328191	0.881988	0.241027	0.813909	1.35874	0.21405	0.191287	0.325164	0.745518	0.474905	0.154944
NR_003143.2	0	0	0	0.0673292	0	0	0.0375564	0	0	0	0	0	0.0334321	0	0	0	0	0.0930419	0.0381223	0
NR_024363.1	1.19919	3.13264	2.03507	2.59701	1.549	1.83869	2.91569	1.66031	1.0018	1.85327	3.12764	1.88622	2.96052	2.4566	1.06434	1.85107	2.36039	2.91961	0.843153	0.649137
NR_024178.1	0	0.0261355	0	0	0	0.0178352	0.0326267	0	0.0493747	0	0	0.020704	0.0875661	0.0298955	0	0	0.0186075	0.0891776	0	0
NR_024604.1	0	0	0	0	0	0	0	0	0	0	0	0	0	0	0	0	0	0	0	0
NR_024376.1	0	0	0	0	0	0	0	0	0	0	0.0757933	0	0	0	0	0	0	0	2.19202e-05	0
NR_027141.2	0	0	0.192325	0	0	0.0853631	0	0	0	0	0	0.184826	0	0	0.119424	0	0.0911188	0	0	0.105964
NR_026868.1	4.68337	5.93866	5.30023	4.86147	6.66646	4.79268	4.86883	4.53618	7.61669	8.24196	3.99589	4.56094	5.17554	4.06009	5.17524	7.22145	5.28353	5.8288	6.00855	5.6594
NR_002794.1	0	0	0	0	0	0	0	0	0	0	0	0	0	0	0	0	0	0	0	0
NR_045208.1	0	0	0	0	0	0	0	0	0	0	0	0	0	0	0	0	0	0	0	0
NR_024591.1	0	0.039748	0.0367406	0.0683609	0	0.0400287	0.189209	0	0.0300762	0.0505868	0.0853371	0.0236528	0.024779	0.0619842	0.173964	0	0	0.256914	0.234495	0.0571422
NR_038424.1	0	0	0	0	0	0	0	0	0	0.157916	0	0	0	0	0	0	0	0	0	0
NR_024074.1	0	0	0	0.0441101	0	0	0	0.0342873	0	0	0	0	0	0	0	0	0	0.0696646	0	0
NR_024241.1	4.3557	6.69416	5.42636	5.77068	4.16379	6.36803	6.49841	6.15782	4.95289	3.74333	6.19479	7.43376	6.05162	4.99849	5.53171	4.43214	6.46063	6.27515	5.20577	5.09082
NR_038409.1	0.0202853	0.129549	0	0.0291107	0	0.053262	0.0568142	0	0.0972518	0	0	0	0.182406	0	0.19454	0.0799161	0.0592285	0	0.137989	0.0439586
NR_026822.1	0	0	0	0.136006	0.000329672	0.0458868	0	0	0.044877	0	0.13077	0.0422466	0.164737	0.0294839	0.161701	0.0416757	0	0.0446057	0.142009	0.0725177
NR_104046.1	0	0	0	0	0	0	0	0	0	0	0	0	0	0	0	0	0	0	0	0
NR_026818.1	0	0	0	0.136006	0.000329672	0.0458868	0	0	0.044877	0	0.13077	0.0422466	0.164737	0.0294839	0.161701	0.0416757	0	0.0446057	0.142009	0.0725177
NR_026819.1	0	0	0	0.136006	0.000329672	0	0	0	0	0	0	0.0422466	0	0	0	0	0	0.0446057	0	0
NR_024251.1	2.73095	5.15072	3.82715	3.44969	3.42144	3.31157	2.59661	4.91575	2.20706	2.9862	4.42698	6.05264	2.72676	3.79723	2.89902	1.02689	5.14328	2.66736	3.34801	3.79362
NR_002161.1	0	0	0	0	0	0	0	0	0	0	0	0	0	0	0	0	0	0	0	0
NR_026592.2	1.87332	6.18957	1.94576	3.7775	2.05023	1.28493	4.15898	1.90918	0.950669	2.93408	4.14688	1.36689	5.71468	6.31082	4.16639	1.2894	1.74249	5.98841	3.55263	1.21407
NR_104045.1	0	0	0	0	0	0	0	0	0	0	0	0	0	0	0	0	0	0	0	0
NR_073407.1	0	0	0	0	0	0	0	0	0	0	0	0	0	0	0	0	0	0	0	0
NR_073408.1	0	0	0	0	0	0	0	0	0	0	0	0	0	0	0	0	0	0	0	0
NR_003268.3	0.034864	0.0757185	0	0.121197	0.0276852	0	0	0	0.0214888	0.0228241	0.0278428	0.0340449	0.0478426	0.0993392	0.0216371	0	0	0.14903	0.0277049	0.0180222
NR_036478.1	0.553602	2.29781	0.341798	2.22682	0	0.397923	2.13213	0.635236	0.701135	0.410142	1.43303	0.395553	1.32446	2.10989	1.17948	0.335838	0.835695	3.73001	0.991787	0
NR_003669.2	0	0	0	0	0	0	0	0	0	0	0	0	0	0	0	0	0	0	0	0
NR_003950.1	0.0225376	0.125712	0.0219888	0.0993246	0.162857	0.0706104	0.211364	0.138279	0.0728253	0.212401	0.105226	0.0239257	0.115306	0.119951	0.285991	0.00155655	0.12257	0.238025	0.107687	0.0219057
NR_027407.1	0	0	0	0	0	0	0	0	0	0	0	0	0	0	0	0	0	0	0	0
NR_036477.1	0	1.69368	0.449545	0.550561	0	0.421746	1.81309	0	1.13009	1.01296	1.45852	7.0675e-09	1.56152	1.25474	1.71068	0.803371	0.627374	1.73621	2.71053	0
NR_003366.2	0	0	0	0.0196955	0	0.0127165	0.0256153	0	0.017269	0	0	0	0	0	0	0.0143419	0	0	0.0231715	0
NR_027320.1	0	0.0671316	0	0	0	0	0	0	0	0	0	0	0	0	0.0398977	0	0	0	0	0.0335681
NR_024250.1	0.556333	0	0	0.61182	1.29302	1.01792	1.87823	0.83418	0	8.05501e-08	1.19881	0.561881	2.19163	0	0	1.11805	0.93503	3.722	0.000113302	0
NR_024361.1	9.4741	10.4265	9.16545	7.96667	11.8862	6.79825	10.5482	10.5295	11.6843	6.68031	12.1435	8.89095	10.82	8.77902	10.2299	8.15915	9.89361	11.1476	8.28704	10.4048
NR_027781.1	1.14117	0	0	0	0.924896	0.992397	0.913484	0.593946	0	0	0	0.578767	0	0	0	0.247136	0.760557	1.13153	0	0
NR_002711.3	0	0	0.0708146	0	0	0	0	0	0	0	0.0506547	0	0	0	0	0.0354134	0	0	0.0552388	0
NR_024362.1	1.18635	5.01843	1.50407	3.84051	2.23411	2.74673	3.76394	1.60779	1.30646	5.0694	4.3111	2.45392	4.25837	5.86072	3.0392	1.2259	1.07943	4.74039	5.14271	0.628154
NM_001122646.2	0	0	0	0	0	0	0	0	0	0	0	0	0	0	0	0	0	0	0	0
NM_001318811.1	0	0	0	0	0	0	0	0.011645	0	0	0	0	0	0	0	0	0	0	0	0
NM_001005327.2	0	0	0	0	0	0	0	0	0	0	0	0	0	0	0	0	0	0	0	0
NM_001242757.1	0	0	0	0	0	0	0	0	0	0	0	0	0	0	0	0	0	0	0	0
NM_001172667.1	0	0	0	0	0	0	0	0	0	0	0	0	0	0	0	0	0	0	0	0
NR_135199.1	0	0	0	0	0	0	0	0	0	0	0	0	0	0	0	0	0	0	0	0
NR_135484.1	0	0.110669	0	0	0	0	0	0	0.175676	0	0	0	0	0	0	0	0	0	0	0
NR_135916.1	0.0330291	0.0412613	0.0277446	0.0776066	0.0401476	0.0110007	0.153893	0	0	0	0.026221	0.0684499	0.101758	0.048462	0	0	0.0804307	0	0.0933626	0
NR_131769.1	0.177402	0	0	0.147873	0	0	0	0	0	0	0	0.119229	0.0991667	0	0	0	0	0	0	0
NR_033338.1	0.277055	5.84423	4.01793	0.286662	0.368677	6.36469	0.107439	3.89513	2.88418	0	2.72108	4.02887	3.19911	3.09737	4.56547	0.950223	3.22932	1.2159	1.3191	5.98993
NR_136579.1	0	0	0	0	0	0	0	0	0	0	0.029972	0	0	0	0	0	0	0	0	0
NR_130165.1	0	0	0	0	0	0	0	0	0	0	0	0	0	0	0	0	0	0	0	0
NR_135747.1	0	0	0	0	0	0	0.130756	0	0	0	0	0	0	0	0	0	0	0	0	0
NR_073428.1	0.974963	2.67125	1.02486	1.47131	0.675815	0	1.39838	0.805107	0	0.98779	3.29587	0.235938	2.25469	1.59926	0.299115	0.253117	0.678306	4.8034	0.431144	0
NR_028075.2	0.25989	0.390028	0.188218	0	0.204732	0	0.222041	0	0.0508851	0.574277	0.198729	0	0.605059	0.616119	0.619979	0.0462203	0.115186	0	0.273052	0.183916
NR_136210.1	0	0	0	0	0	0	0.0586083	0	0	0	0	0	0	0	0	0	0	0	0	0
NR_026782.2	0	0	0	0	0	0	0	0	0	0	0	0	0	0	0	0	0	0	0	0
NR_135618.1	0	0	0	0	0	0	0	0	0	0	0	0	0	0	0	0	0	0	0	0
NR_135270.1	0	1.33	0	0	0.459114	0	0.375546	0	0	0	0.482489	0.258488	0.877513	0.39899	0	0.399557	0.567554	0	0	0
NR_104115.1	0	0.0711354	0.0385728	0	0	0.0410747	0.0920212	0	0.0417131	0.138857	0	0	0.0490739	0	0	0	0	0	0	0
NR_037792.1	3.38174	1.5529	2.73989	2.05743	2.76213	3.26911	1.15091	3.56741	4.14737	1.39775	1.78525	2.63137	1.34673	1.34389	2.93241	2.61244	1.86203	2.10668	2.19702	4.77342
NR_134874.1	0	0	0	0	0	0	0	0	0	0	0	0	0	0	0	0	0	0	0	0
NR_136580.1	0	0	0	0	0	0	0	0	0	0	0	0	0	0	0	0	0	0	0	0
NR_135229.1	132.559	88.9243	122.493	81.0411	123.118	129.353	93.12	120.062	148.258	123.446	73.7961	113.564	84.9063	72.6938	99.4376	142.086	136.766	89.4077	96.8009	128.314
NR_135795.1	0	0	0	0	0	0	0	0	0	0	0	0	0	0	0	0	0	0	0	0
NR_131761.1	0	0	0	0	0	0	0	0	0	0	0	0	0	0	0	0	0	0	0	0
NR_135483.1	0	0	0	0.247949	4.46575e-05	0.471712	0	0.0161576	0	0	0	0	0	0	0	0	0	0	0.249154	0.550492
NR_135043.1	0	2.95108e-09	0	0	0	0	0	0	0	4.13335e-08	0	0	0.015444	0	0	0	6.71421e-09	0	0	9.73992e-09
NR_111984.1	0	0	0	0.0178471	0	0	0	0	0	0	0	0	0	0	0	0	0	0	0	0
NR_027459.2	0	0	0	0	0	0	0	0	0	0	0	0	0	0	0	0	0	0	0	0
NR_135796.1	0	0	0	0	0	0	0	0	0	0	0	0	0	0	0	0	0	0	0	0
NR_135232.1	0	0	0.308431	0	0.344601	0.29284	0	0	0.884986	0.319334	0	0	0.0255602	0	0	0	0.182743	0.585408	0	0
NR_135067.1	2.48091	0.92194	0	0	0.315468	0.859048	0	2.22696	0.72113	0	0.82591	0.832406	0.434448	0.852085	0	0.525267	0	0	0.25592	0.467308
NR_073051.1	1.33633	0	0	0	0.505891	0	0	0.790142	0	0.685067	0	0.656358	2.5468	0.983727	1.05425	0	2.63893e-09	0	0	0
NR_033265.1	7.28212e-05	0.0133825	1.97152e-06	1.42559e-05	4.71791e-07	0.769534	0.00014705	0.380224	0.00955516	0.0169578	6.78562e-06	0.576505	2.46725	9.42643e-06	9.44627e-08	6.28214e-05	0.000112617	3.14194	2.16811	0
NR_131762.1	0	0	0	0	0	0	0	0	0	0	0	0	0	0	0	0	0	0	0	0
NR_110866.1	0	0.168631	0	0	0	0	0	0	0	0.192777	0	0	0	0.225074	0	0	0	0.361088	0.216869	0
NR_104583.1	0	0	0	0	0	0.0516931	0	0	0	0	0	0	0	0	0	0.0701852	0	0	0	0.0544102
NR_104408.1	0.337486	0	0.919458	0.532395	0	0.408107	0.737379	1.94739	1.04437	0	0	0.711208	0.309842	0.00184446	0.961832	0.561156	1.83308	1.9121	0.22462	0.534847
NR_135617.1	0	0	0	0	0	0	0	0	0	0	0	0	0	0	0	0	0	0	0	0
NR_126051.1	0.293465	0	1.8365e-07	9.10533e-08	0	0	1.3407	0	0.103973	0	0	0	1.63041e-10	2.26838e-07	0	0	0	0	2.33962	0
NR_135503.1	0	0.0459666	0	0.000459226	0.316475	0	0.000132925	1.33962e-06	0	0	0	0	0	0	0	0.000149627	0	0	8.74963e-09	0
NR_037715.1	12.3302	21.1074	11.0553	21.4518	16.9586	12.4441	22.9761	13.59	16.2117	17.4137	20.0147	13.9654	18.1536	28.3809	14.3434	9.64187	17.4245	35.0869	21.8809	16.5661
NR_033234.1	0	0	0	0	0	0	0	0	0	0	0	0	0	0	0	0	0	0	0	0
NR_131772.1	0	0	0.545348	0.304036	0	0.63031	0	0.192549	0.164253	0.00402651	0.149137	0	0	0.00378739	0	0.440457	2.42488e-09	0	0	0
NR_110752.1	0	0	0	0	0	0	0	0	0	0	0	0	0	0	0	0	0	0	0	0
NR_110865.1	0	0	0	0	0	0	0	0	0	0	0	0	0	0	0	0	0	0	0	0
NR_104150.1	0	0	0	0	0	0	0	0	0	0.227747	0	0	0	0	0	0.133784	0.101884	0	0	0
NR_102364.2	0	0	0	0	0	0	0	0	0.0290605	0	0	0	0	0	0	0	0	0	0	0
NR_046266.1	0	0	0	0	0	0	0	0	0	0	0	0	0	0	0	0	0	0	0	0
NR_135797.1	0	0	0	0	0	0	0	0	0	0	0	0	0	0	0	0	0	0	0	0
NR_135745.1	0	0	0	0	0	0	0	0	0	0	0	0	0	0	0.345212	0	0	0	0	0
NR_027480.1	0	0	0	0	0	0	0	0	0	0	0	0	0	0	0	0	0	0	0	0
NR_136213.1	0	0	0	0	0	0	0	0	0	0	0	0	0	0	0	0	0	0	0	0
NR_135502.1	0	0.128353	0	0.713641	0.00190671	0.026225	0.258266	0.0625881	0	1.19608e-06	0	0	0	0	0	2.42361e-05	0	0	0.683121	0
NR_131779.1	0	0	0	0	0	0	0	0	0	0	0	0	0.0898398	0	0	0	0	0	0	0
NR_109867.1	0	0	0	0	0	0	0	0	0	0	0	0	0	0	0	0	0	0	0	0
NR_126440.1	0	0	0	0	0	0	0	0	0	0	0	0	0	0	0	0	0	0	0	0
NR_037793.1	0	0.395178	1.36891	0.753575	3.83054	0	1.4194	0.324243	1.2021	5.83576	0.504915	0	1.41558	0.872384	0	0.774254	1.07838	3.01923	0	0
NR_102409.1	0	0.445139	0	4.98118e-07	0	0	0	0.317342	0	0	0	1.07455e-08	0	0	0	0	0	0.913135	0	0
NR_073132.1	0	0	0	0	0	0	0	0	0	0	0	0	0	0	0	0	0	0	0	0
NR_130117.1	0	2.53674	0.478098	0	1.48838	0.46044	1.28026	0.380626	0	0.000226089	0.60927	0.395629	0	1.48907	0	0.686428	0.536123	6.49714e-06	0	0
NR_102363.2	0	0	0	0	0	0	0	0	0.00118699	0	0	0	0	0	0	0	0	0	0	0
NR_135504.1	0	0	0	0	0	0.0266822	0.15107	0	0.403626	0.275918	0	0	0	0	0	2.69845e-07	9.02134e-08	2.84271e-06	1.5321e-06	0.298394
NR_135746.1	0	0	0	0	0	0	0.246049	0	0	0	0	0	0	0	0	0	0	0	0	0
NR_133924.1	0.0500212	1.20488	0.20376	4.6851e-10	0.539207	0	0.168732	6.62531e-10	0	0	1.80205	0.696883	0.172109	0.00143123	1.00885	0	0.0749834	0	2.20367e-06	0.733855
NR_135794.1	0	0	0	0	0	0	0	0	0	0	0	0	0	0	0	0	0	0	0	0
NR_103997.1	0.0749818	0.15932	0	0.187656	0.154473	0.0828884	0.36576	0	0.119467	0.262883	0.172679	0.0711192	0.144891	0.300664	0.230381	0.0723119	0	0.111253	0.212733	0.0350079
NR_135798.1	0	0	0	0	0	0	0	0	0	0	0	0	0	0	0	0	0	0	0	0
NR_027694.1	0	0.0545915	0.0455054	0	0	0	0	0	0	0.0665506	0.0542882	0	0.0502041	0	0.0450205	0.0760524	0	0.13561	0	0
NR_111931.1	0	0	0	0	0	0	0	0	0	0	0	0	0	0	0	0	0	0	0	0
NR_135641.1	3.48404	0.633941	1.55039	2.49885	1.24883	0.681632	0	1.87787	0.233443	0.924016	6.39567	7.67306e-08	5.95946	2.53539	3.82633	0.715677	1.20355	1.27867	0.969795	0
NR_073046.1	0	0	0	0	0	0	0	0	0	0	0	2.66118e-05	0	0	0	0	0	0.000385808	0	0
NR_135191.1	3.34532e-07	1.25438	3.53435e-05	0	0.0442588	0.333653	0.00169186	0.186355	3.70536e-09	0.00132898	3.54619e-07	0.421	0.0555962	0.480765	2.94898e-08	1.04998e-09	2.77911e-07	2.56514e-05	6.53678e-05	7.7991e-05
NR_136622.1	0.000441973	0.960331	7.75732e-08	0.00216221	0.00019371	1.18637	0.000341999	3.68571e-08	0.976775	0.000669529	0.00120231	1.14537	0.788979	0.872608	1.24912	0.833942	0.00187887	0.924619	1.07816	1.57785e-05
NR_033151.1	0	0	0	0	0	0	0	0	0	0	0	0	0	0	0	0	0	0	0	0
NR_134900.1	0	0	0	0.13067	0	0.119786	0	0	0.178721	0	0	0	0	0	0	0	0.00867863	0	0	1.74983e-07
NR_104220.1	0.00555929	0.577531	0.0479982	0.295634	0.0967166	0.0571283	0.471878	0.281665	0.221742	0.184402	0.430093	0.0809135	0.476512	0.483246	0.259107	0.235265	0.0192873	0.374773	0.241847	0.221439
NR_111929.1	0.00386632	0	0	0.393267	0	0.0541347	0.305707	0	0	0.251055	0	0	0.13361	0	0.00865222	0.144057	0	0.522564	0.300886	0
NR_073151.1	0	0	0	0	0	0	0	0	0	0	0	0	0	0	0	0	0	0	0	0
NR_110314.1	0	0	0	0	0	0	0	0	0	0	0	0	0	0	0	0	0	0	0	0
NR_130711.1	0	0	0	0	0	0	0	0	0	0	0	0	0	0	0	0	0	0	0	0
NR_104295.1	0.479863	3.76945	0	1.40607	1.21767	0.197043	1.14797	0	0.307189	1.56769	2.56568	0	1.99177	2.07453	2.73148	0	0.2225	5.25993	1.59324	0.271574
NR_027149.1	0	0	0	0	0	0	0	0	0	0	0	0	0	0	0	0	0	0	0	0
NR_136216.1	0	0	0	0	0	0	0	0	0	0	0	0	0	0	0	0	0	0	0	0
NR_027410.1	0	0.407875	0	0	0	0	0	0	0	0	0	0	0.948139	1.61113e-08	0	0	0	0.898941	0	0
NR_027711.1	0	0	0	0	0	0	0	0	0	0	0	0	0	0	0	0	0	0	0	0
NR_073432.1	2.601	11.0114	5.51894	7.34106	3.43482	6.08188	8.10394	5.8867	5.50823	5.40041	7.22942	5.03085	8.06555	7.70004	4.15209	4.31232	6.4038	9.62045	6.36334	5.14477
NR_026952.1	0.231842	0.188317	0.390448	0.193946	0.156136	0.151962	0.246547	0.181192	0.164328	0.284632	0.423865	0.156776	0.275962	0.48236	0.497179	0.255247	0.229597	0.191606	0.157119	0.231566
NR_027293.2	6.63766	6.29418	5.91227	7.43997	6.62187	7.11317	6.41094	6.16908	7.8445	5.67675	4.97975	5.83992	5.87169	6.23552	7.0729	5.81515	5.85576	6.07828	5.41835	7.1083
NR_003246.4	0.0340177	0	0.0720656	0.131942	0.0809376	0	0.243003	0.0803927	0.193815	0.445002	0.210769	0.146987	0.351476	0.149985	0.112018	0	0.0878331	0	0	0.00138579
NR_077058.1	0.104016	0.123492	0.158946	0.129108	0.0576704	0.132861	0.0340146	0.158962	0.197711	0.0682226	0.237326	0.174891	0.122765	0.114825	0.145197	0.118302	0.0302022	0.103027	0.0515753	0.17569
NR_073430.1	0.0289832	0	0.0313483	0.0696769	0	0.00854357	0.0336629	0	0.033338	0	0	0.0119564	0.0141843	0.0162209	0.0393092	0.0305507	0	0.0661929	0.0452226	0.0206096
NR_033770.1	0.117848	0.142474	0.0513406	0	0	0.0469971	0.0637329	0.05513	0.374553	0.190082	0.0689595	0	0.0876733	0	0.071499	0.0529176	0.0813782	0.307493	0.270732	0.188096
NR_027688.2	0.148686	0.166968	0.0648301	0.268205	0.348576	0.0565829	0.227268	0.0697736	0	0.234332	0.217594	0.0667223	0.166626	0.448064	0.117288	0.0904887	0.0871467	0.444364	0.311243	0
NR_045005.1	0	0	0.104499	0	0	0.0811251	0.298697	0	0	0.125394	0	0	0.132948	0	0	0	0	0	0	0
NR_021485.2	0	0	0	0.0561116	0.021886	0.0113091	0.0423587	0.0139437	0	0.0343868	0.0198057	0	0.0179521	0.0385286	0.0165941	0	0.0115469	0.0503283	0	0
NR_045677.1	0	0	0	0	0	0	0	0	0	0	0	0	0	0	0	0	0	0	0	0
NR_046351.1	0	0	0	0	0	0	0	0	0.124203	0	0	0	0	0	0	0	0	0	0	0
NR_135203.1	0.411963	0.530188	0.560217	0.404136	0.48523	0.937417	0.664619	0.634382	0.656478	0.340833	0.66302	0.342728	0.686865	0.909141	0.543287	0.365453	0.469805	0.409323	0.631089	0.511125
NR_033742.1	0	0.0378374	0.0359891	0.0459991	0	0.0279286	0	0	0.0375738	0.0833623	0	0.032567	0.0443633	0	0	0	0	0.0636356	0	0
NR_027754.2	0.0931359	0.187465	0.164369	0.186895	0.0941663	0.114482	0.325666	0.104374	0.164686	0.481743	0	0.115532	0.154345	0.199737	0.203739	0.0953348	0.160182	0.43418	0.183432	0.109639
NR_046005.1	0	0	0	0	0	0	0	0	0	0	0	0	0	0	0	0	0	0	0	0
NR_027291.1	0.147863	0.256847	0.154426	0.305293	0.328024	0.129724	0.531608	0.122589	0.181519	0.750619	0.437762	0.100132	0.279864	0.486277	0.137365	0	0.291626	0.665172	0.211798	0.197652
NR_028347.1	0	0.0353337	0	0	0	0	0	0	0	0	0	0	0	0	0	0	0	0	0	0
NR_045004.1	0	0	0	0	0	0	0	0.0630855	0	0	0	0.122947	0	0	0	0	0	0.240369	0	0
NR_103714.2	0.0675163	0.0920158	0.137347	0.189215	0	0.0909426	0	0.112329	0	0	0	0.0911033	0.1406	0	0.109413	0.17938	0	0.399831	0	0.0836948
NR_027898.1	0.0151241	0.0378755	0.0166887	0.0365147	0.0568325	0.0216833	0.0239728	0.0103777	0.0121017	0.0287911	0.0314445	0.0404327	0.0502315	0.0657367	0.0297364	0.00547285	0.0182313	0.100603	0.0488865	0.0107847
NR_024438.2	3.04968	2.376	3.01106	2.0069	4.21763	3.47623	5.749	6.04001	4.57957	4.79182	4.82023	3.70665	2.38054	2.17319	2.39078	3.64762	6.26975	5.62519	4.91722	4.96186
NR_026823.2	0	0.31993	0.106839	0.132469	0.154833	0.126067	0.264229	0.124092	0.0901769	0.432876	0	0	0.211655	0	0	0	0.0984552	0.507038	0	0
NR_033753.2	0.0608978	0.0708426	0	0.0599879	0.049931	0.0696829	0.180551	0.0644644	0.0163995	0.257629	0.0336822	0.0708036	0.0195611	0.0758722	0.0720093	0.0417327	0.0254317	0	0.0448662	0
NR_046354.1	0.338561	0.30335	0.152913	0	0.1494	0	0.324293	0.0231007	0.230248	0	0.264229	0	0.236695	0.192279	0	0.0782189	0.109802	0	0	0.0969595
NR_029395.1	0	0	0	0	0.188917	0	0	0	0	0.156659	0.182455	0.118218	0	0	0	0	0	0.483826	0	0
NR_002171.2	0	0.0304989	0	0	0	0	0	0	0	0	0	0	0.0279366	0	0.0241119	0.0210206	0	0	0	0
NR_029386.1	0	0	0	0	0	0	0	0	0	0	0	0	0	0	0	0	0	0	0	0
NR_003658.2	0	1.63436	0.723807	0	0.349127	0	0.344819	0.224201	0	0.579024	1.01155	0	0.920858	0	0.277524	0.380696	0.892715	0	0	0
NR_026980.2	0	0	0	0	0	0	0	0	0	0	0	0	0	0	0	0	0	0	0	0
NR_027401.2	0.212261	0.426422	0.118886	0.304608	0.172034	0.184589	0.679644	0.110476	0.0642825	0.0713291	0.271212	0.484436	0.226878	0.778334	0.820505	0.0583894	0.145339	0.420936	0.0862357	0.0574965
NR_028067.1	0	0	0	0	0	0	0	0	0	0	0	0	0	0	0	0	0	0	0	0
NR_104294.1	0	0	0.0269988	0	0	0	0	0	0	0	0	0	0	0	0	0	0	0	0	0
NR_108107.1	0.136214	0.201417	0.0695814	0	0.146849	0.0470828	0	0.0819471	0	0.0346126	0.0557992	0	0.245634	0	0.0882976	0.170323	0.145202	0.179657	0.198455	0.0383101
NR_027466.1	0.0410978	0.22866	0.046681	0.334188	0.0347973	0.0747952	0.16478	0.0652868	0.0496321	0.137914	0.12523	0.021481	0.246227	0.188288	0.299374	0.0458669	0.0782992	0.270175	0.165979	0.0249937
NR_040114.1	0	0	0	0	0	0.144735	0	0	0	0	0	0	0	0	0	0	0	0	0	0
NR_047651.1	0.519538	0.985584	0.70669	1.41126	0.421075	1.04884	1.63381	1.00276	1.34863	1.44658	2.29479	0.903408	1.8246	0.870893	2.91608	1.08208	0.9985	2.0238	2.6535	1.02532
NR_027425.1	0	0	0	0	0	0	0	0	0	0	0	0	0	0	0	0	0	0	0	0
NR_026802.1	0.157895	0.134363	0.202069	0.280161	0.0677196	0.105132	0.437137	0.100545	0.314691	0.165485	0.80692	0.1093	0.464822	0.188971	0.294933	0.0396991	0.0543969	0.441334	0.155398	0.261932
NR_003238.2	0	0	0	0	0	0	0	0	0	0	0	0	0	0	0	0	0.0589904	0	0	0
NR_027620.3	0.348913	0.621376	0.260187	0.715302	0.484777	0.269063	0.555374	0.409611	0.301905	0.469	0.697846	0.451011	0.586802	0.731096	0.481692	0.328061	0.3868	0.950116	0.54449	0.297038
NR_026758.2	0.0310736	0.119385	0.0955809	0.0841815	0.0187394	0.097929	0.0568355	0.0646916	0.15501	0.143455	0.152656	0.0315192	0.176797	0.0715953	0.302906	0.133428	0.0206176	0.217497	0.391102	0.105196
NR_026938.2	0.0105566	0.180542	0.0235263	0.134403	0.068712	0.0629916	0.201186	0.0754545	0.0760546	0.112926	0.049	0.0316298	0.193942	0.137431	0.202416	0.0573487	0.0187873	0.124711	0.102178	0.0225622
NR_027402.1	0.212261	0.426422	0.118886	0.304608	0.172034	0.184589	0.679644	0.110476	0.0642825	0.0713291	0.271212	0.484436	0.226878	0.778334	0.820505	0.0583894	0.145339	0.420936	0.0862357	0.0574965
NR_027256.1	0	0	0	0.0752432	0	0	0	0	0	0	0	0	0	0	0	0	0	0	0	0
NR_045002.1	0	0.1283	0	0.164178	0	0.0479708	0.287853	0.0763608	0.0685942	0.0753171	0.423993	0.0563571	0.159265	0.15885	0.0689924	0	0.182811	0.768607	0.0914628	0.161494
NR_029404.1	0.505035	0.304244	0.244876	0.130267	0.153346	0.126933	0.191511	0.181055	0.108042	0.0593424	0.0934589	0.153164	0.427631	0.183835	0.119115	0.198701	0.163358	0.124354	0.14722	0.0969585
NR_038275.2	3.17301	3.2381	2.37021	3.06836	3.99342	1.74409	4.37717	2.49033	0.969439	3.52245	4.92601	2.03731	4.58093	4.84354	1.25908	1.18568	3.07211	4.50799	1.54002	1.55919
NR_040113.1	0	0	0	0	0.0343565	0	0	0	0.0329988	0	0	0.0471037	0.0421331	0	0.0439054	0	0.0147212	0.0269897	0.0362909	0.0677814
NR_132962.1	0.145974	0.653705	0	0.987989	0.236618	0	0.719526	0.08224	0	1.22586	0.653602	0	0.799203	0.802167	1.05479	0.317771	0	1.79283	0.297884	0.179142
NR_027916.2	0	0	0	0	0	0	0	0	0	0	0.0365298	0	0	0	0	0	0	0	0	0
NR_130741.1	0.0651557	0	0.0877108	0.100321	0	0	0	0.089126	0.152103	0	0	0	0.0784777	0.080759	0.198974	0.0809749	0.195184	0	0.237561	0
NR_104039.1	0	0	0	0	0	0	0	0	0	0	0	0	1.96785	0	0	0	0	0	0	0
NR_040023.1	0.9679	2.64401	1.22245	2.27596	1.09576	1.06487	2.52502	1.07028	1.08397	2.35528	2.55997	1.1128	2.54954	2.27376	1.99883	0.89492	0.924154	3.41293	2.26148	1.1268
NR_027421.1	2.32938	1.49235	5.32112	2.08034	1.01636	0	0	0.636625	0	1.66472	0	3.22338	0	2.17586	2.19768	4.97098	0	2.83698	1.77293	0
NR_046365.1	0	0	0	0	0	0	0	0	0	0	0	0	0	0	0	0	0	0	0	0
NR_027011.1	0.0316637	0.0344364	0.0356024	0	0.102028	0.110604	0.0509283	0.0330195	0.15344	0.0426449	0.0996514	0.0647913	0.18052	0.0464384	0.0817872	0.139489	0.0581565	0	0	0.0343773
NR_027156.1	0	0.0270028	0	0	0	0.0831012	0.0427177	0	0	0	0.0407096	0.0469071	0.112101	0	0.0294627	0	0.075113	0	0.061075	0.12217
NR_028501.1	0	0	0	0.0624295	0	0.0378316	0.0696466	0	0	0	0.0681046	0	0.0619983	0.063808	0.0560611	0	0	0	0.141392	0
NR_073421.2	0	0	0	0	0	0	0	0	0	0	0	0	0	0	0	0	0	0	0	0
NR_027632.1	0	0.143165	0.358361	0	0	0.396888	0	0.216773	0.415348	0.902313	0	0	0.630803	0	0	0.42685	0.104747	0	0.224011	0
NR_026643.1	0	0	0	0	0	0	0	0	0	0	0	0	0	0	0	0	0	0	0	0
NR_073459.1	0	2.26809	0	0	0	0	2.88455	0	0	0	0	0	0	0	0.000226746	0	0	0	0	0
NR_110998.1	0	0	0	0	0	0	0	0	0	0	0	0	0	0	0	0	0	0	0	0
NR_027508.1	0.0826233	0.059176	0.122266	0.0880523	0.0841528	0.0708675	0.262153	0.111592	0.0329257	0.257201	0.130444	0.136181	0.155035	0.324799	0.0361081	0.0906803	0.0836106	0.32584	0.237849	0.029367
NR_027411.2	0	0	0	0	0	0	0	0	0	0	0	0	0.000606418	0	0.00106177	0	0	0	0	0
NR_026743.1	0	0.130975	0.0444139	0.0573313	0	0	0	0	0	0.0538332	0.125612	0	0	0.175522	0	0	0	0.079207	0.0647887	0.0444594
NR_033857.1	0	0.102954	0.103408	0	0	0.156635	0.148914	0	0	0.118765	0	0	0.269728	0	0	0.108882	0	0	0	0
NR_120439.1	0	0	0	0	0	0	0	0	0	0	0	0	0	0	0	0	0	0	0	0
NR_044994.1	0	1.80767	0.0598227	0.530103	0.114027	0.077387	0.515425	0.0569062	0.0215512	0.352447	1.44079	0.0180525	1.42408	0.789345	0.366541	0.0390998	0.0483967	1.2993	0.375994	0.0787854
NR_003525.2	0.0821593	0.0880331	0.0946129	0.162077	0.106246	0.118153	0.107346	0.175662	0.0809722	0.0407745	0.17472	0.148877	0.14854	0.184989	0.116079	0.0664936	0.161962	0.10286	0.238513	0.187576
NR_130740.1	2.73635	4.48061	3.90901	3.94698	4.42213	4.08376	3.70577	3.64251	3.31256	3.71905	4.67955	4.26089	3.65784	4.05473	2.96019	2.44937	4.03425	5.29115	3.00585	3.0915
NR_027634.1	2.34693	1.96828	2.36958	2.57571	2.6792	2.80737	2.6321	3.12733	3.18967	1.28027	2.02303	2.86388	1.6258	1.8728	3.13216	3.36028	2.47392	2.22754	2.50069	3.20811
NR_003612.2	0.064939	0.335828	0.256801	0.26972	0.189496	0.158196	0.602117	0.197968	0.162154	0.718099	0.469342	0.157301	0.443536	0.488836	0.195506	0.144732	0.130477	0.762428	0.415658	0.0796697
NM_015070.5	0.0492589	0.303551	0.38688	0.0800907	0.418101	0.281968	0.353772	0.192673	0.141525	0.328817	0.934435	0.0606546	0.526878	0.574181	0.601883	0.0696666	0.200078	0.942828	1.1231	0.208033
NM_001076788.1	0.000987404	0.000171221	5.45316e-08	7.19915e-08	0.00715782	0.00185119	0.310217	7.74782e-05	0.178457	0.914212	0.000807878	5.61146e-05	0.1241	7.21042e-07	0.0451511	0.000145942	0.248882	0.385624	3.23582	0.00363707
NM_001330564.1	0.0013603	0.000286993	3.42556e-07	0.000612741	0.0344925	0.00248611	0.0312558	1.37394e-06	0.264491	0.578123	0.000589633	7.67287e-05	0.000265367	4.20024e-06	0.0143601	0.000923028	0.568937	0.0221944	1.23993	0.00389553
NR_136648.1	0.535746	1.43757	1.23169	0	1.19936	0.519224	4.9238e-08	0.923696	0	0	0.436655	0	0.666643	0	0	1.31959	0.305326	0.65227	0	0.628206
NR_136691.1	0	0	0	0	0	0	0	0	0	0	0	0	0	0	0	0	0	0	0	0
NR_138054.1	0	0	0	0	0	0	0	0.446359	1.13648	0	0	0	0	0	1.16325e-09	0	0	0	0	0
NR_136646.1	0.27298	1.4748	0.689031	0	0.40167	0.246734	2.3193e-08	0.480629	0	0	0.508529	0	0.469689	0	0	0.465938	0.326942	0.75222	0	0.392911
NR_136645.1	4.03118e-08	2.40387e-09	0	2.1554e-09	0	3.75944e-09	0	0	1.8468e-08	1.1017e-06	0	0	1.37648e-09	0	0	0	1.29584e-07	8.01302e-10	1.74289e-09	3.894e-10
NR_138056.1	0.00029059	2.2071e-07	1.78926e-05	0.670875	0.0233066	0	1.63711	6.17604e-10	0.276097	0.000560366	1.57605	4.11638e-07	6.90659e-06	0	0	0	1.74198	0	2.28428	0.391878
NR_136647.1	0.065568	0	0	0	4.08903e-06	0	0.706956	1.39878e-05	0.00023122	3.64779	1.41235e-07	0	8.06248e-06	0.151894	0	0	0.0019641	1.29391e-06	1.63622e-05	0.000430558
NR_138091.1	0	0	0	0	0	0.0389988	0.0268873	0.0163625	0	0.0210275	0	0	0.0313746	0	0	0	0	0	0.0387039	0.0347185
NM_015184.5	6.36337e-05	4.21909	5.97171e-09	2.82203	3.25297	1.34254e-09	4.74918	0.316773	5.38011	9.52074e-08	8.79718	0.00857396	2.52304	7.71836	0.00868579	0	0.681745	9.20844	3.13219	4.26574
NR_049732.1	0	0	0	0	0	0	0	0	0	0	0	0	0	0	0	0	0	0	0	0
NR_138483.1	0	0	2.03973e-05	0	0	0	0	1.95911e-08	0	0	0	0	0	0	0	0	0	0	0	0
NR_130126.1	0	0	0	0	0	0	0	0	0	0	0	0	0	0	0	0	0	0	0	0
NR_049731.1	0	0	0	0	0	0	0	0	0	0	0	0	0	0	0	0	0	0	0	0
NR_028052.1	114.764	134.606	120.091	114.854	108.367	124.612	94.8136	148.893	104.288	63.2046	108.22	131.949	117.137	116.841	71.5541	73.9707	151.44	97.0442	82.1128	131.303
NR_049733.1	0	0	0	0	0	0	0	0	0	0	0	0	0	0	0	0	0	0	0	0
NR_049734.1	0	0	0	0	0	0	0	0	0	0	0	0	0	0	0	0	0	0	0	0
NR_103481.1	0	0	0	0	0	0	0	0	0	0	0	0	0	0	0	0	0	0	0	0
NR_138485.1	0.366155	0.605579	0.243565	0.206991	0.185254	0.205328	1.27017	0.811982	0.385258	0.18389	9.06856e-05	0.528902	0.619885	0.784991	0.274735	0.127786	2.96149e-07	0.000305571	0.896008	0.156959
NR_130972.1	0	1.32533	0	4.4569e-10	0	1.82535	0.00115189	0	0	5.42472e-08	0	1.3148	0.0937973	0.419077	0	1.81108e-07	0.391665	0	0.0368726	0.0802347
NR_104600.1	1.03357	0.690991	0.424063	0.999576	1.19023	2.31642	1.96238	2.35336	0.826294	2.13789	0.708349	3.20307	3.01606	2.03352	1.84836	2.25393	1.4963	1.90034	2.73937	1.28096
NR_121210.1	0.0551728	0.0294233	0	0.00756691	0.0448194	0	0	0	0	0	0.0853327	0	0	0	0.034728	0	0	0	0	0.029985
NR_134878.1	0.00971528	0.0702839	0.0152435	0	0.0204122	0.0366441	0.0571553	0.0212332	0	0.0618975	0.0948532	0.0128933	0.0886541	0.0880016	0.0273372	0.0735713	0.0429878	0	0.08586	0.0379334
NR_037162.1	0.0191784	1.19101	0.0844704	0.73039	0.229751	0.238237	0.70177	0.242858	0.104031	0.418646	0.654444	0.073632	1.04083	0.81623	0.631062	0.282202	0.155016	0.741448	0.912984	0.403601
NR_138484.1	0.250563	2.5949	0.386529	1.74074	0.601404	0.727437	3.82995	0.25956	0.765245	1.25531	3.65465	0.863851	2.97143	4.11644	1.70188	0.341275	1.19108	2.1358	3.32964	0.380832
NR_073398.1	0	8.17284e-09	0	0	0	0.362381	1.21078	0	0	0	0	0	0	0	0	0	0.110404	0	0	0.000239818
NR_136519.1	0.117516	0.235628	0.0569925	0.138003	0.120518	0.224531	0.554499	0.201047	0.0349359	0.70715	0.666715	0.276403	0.322922	0.235286	0.309495	0.0552195	0.0704144	0.441299	0.19786	0.05102
NR_002837.1	0	0	0	0	0.142726	0	0	0.0984654	0.230879	0	0	0.0976001	0	0	0	0.100798	0.183892	0	0	0.21058
NR_027279.1	0	0	0	0	0	0	0.0783331	0	0.118543	0	0	0	0	0	0	0	0	0.0970309	0.0795135	0
NR_003264.2	6.61609	15.3597	5.91753	9.52641	6.82424	7.99356	6.9644	5.93972	2.81927	7.90166	8.49102	4.02028	11.6752	11.4454	5.1775	2.54433	7.00077	14.3543	6.27788	5.91561
NR_015340.1	0	0	0	0	0	0	0	0	0	0	0	0	0	0	0	0	0	0	0	0
NR_033864.1	0	0	0	0	0	0	0	0	0	0	0	0	0	0	0	0	0	0	0	0
NR_033410.1	0	0	0	0.0437457	0	0.079104	0	0.0316497	0.036518	0.0403167	0	0	0	0	0.0392253	0.0661012	0.0277832	0.0597814	0.0973898	0
NR_003228.1	0.120252	0.282999	0.284442	0.287912	0.168969	0.29726	0.323922	0.0651071	0.067823	0.226026	0	0.0533355	0.178617	0.252814	0.679622	0.335158	0.109724	0.386545	0.132762	0.349289
NR_003263.2	6.2462	10.1922	5.30291	6.94271	6.39881	5.71968	12.6349	5.55304	7.44176	11.3697	7.15333	3.48484	9.53449	10.0444	9.63106	5.94982	7.36507	15.0655	12.8932	3.91091
NR_110506.1	0	0	0.0951351	0	0	0.0749081	0	0	0.20404	0	0	0	0	0	0.211856	0.093371	0	0	0	0
NR_002829.1	0	0	0	0	0	0	0	0	0	0	0	0	0	0	0	0	0	0	0	0
NR_003266.2	4.60267	12.6123	5.29727	7.74939	6.39578	6.06386	7.28984	5.41698	6.97727	4.91982	9.69139	5.02809	9.36921	11.3305	6.37434	3.98318	6.61209	13.0649	6.54976	6.89656
NR_003661.2	0.240097	0.768877	0.199191	0.763753	0.633735	0.35323	0.803643	0.236513	0.135705	1.71396	0.935773	0.316804	0.637435	1.0295	0.7732	0.33493	0.248636	1.01985	0.95445	0.217658
NR_024162.1	0.0353905	0.259637	0.0532581	0.193006	0.109455	0.130427	0.217133	0.104137	0.0408417	0.0476286	0.221726	0.0833995	0.241601	0.262449	0.0919013	0.0728334	0.128594	0.235201	0.217119	0.114956
NR_138479.1	0	0.80426	0	0	0	0	1.25066	0.515039	0.895322	0.923732	4.28601	0	0	2.11881	0	0	0.698163	1.25538	0	0
NR_040243.1	0.0493874	0.0736717	0.0404978	0	0.146255	1.60356e-10	1.24156	1.9164e-06	0	1.05229	1.08494	0.490332	1.40371	0.09238	8.56767e-05	1.59017e-05	0.0574472	0.434832	0.00296247	9.02378e-09
NR_040241.1	0.191198	0.125529	0.178131	0	0.561452	6.9499e-10	0.858696	1.92321e-06	0	0.00717888	7.63423e-05	0.000165008	0.000440312	0.0811174	0.373282	0.29461	0.0604085	0.740684	0.00210788	0.80625
NR_073201.3	0.0284361	1.07885	0.305512	1.25277	0.373663	0.886959	0.877931	0.00367256	2.35135	3.28935	1.95644	0	2.74375	1.87483	0.447921	2.08761	0.849176	3.21596	2.74499	0.00156834
NR_045670.1	1.12827	1.05065	2.32124	0.920155	2.39745	1.97521	0.923649	2.20846	2.32511	1.20435	1.86825	1.55131	2.98378	2.1158	1.24463	2.94473	1.87483	1.19722	1.11344	1.3693
NR_045669.1	0	11.8124	0.140366	6.13474	0.411736	0.448158	4.65038	0.137328	0.313103	2.49993	7.27193	0.257844	7.72323	9.04694	2.12254	0.852062	0.119317	16.7017	2.4315	0.556941
NR_045671.1	3.11236	5.50611	5.42309	2.45476	3.86851	2.69475	4.00845	3.88058	7.45273	3.93083	4.40063	3.49011	4.62708	5.65163	2.18977	4.26606	5.19019	3.32127	3.27096	4.14747
NR_136732.1	0	0	0	0	0	0.32056	0	5.36178e-09	0	9.3739e-09	1.77296e-09	0	0	0	0	0	0	0	1.14465e-07	0
NR_104307.2	0.179942	8.32777	0.615309	4.98268	0.202068	0.350829	6.92985	1.17807	0.255534	4.84452	7.99344	0.323134	7.43236	8.05821	3.2093	0.607168	1.06075	8.36257	8.27598	0.624295
NR_104309.2	4.37932e-08	2.93886	0	0.703911	1.75823	1.6126e-09	0.000493249	0.00564325	0	1.30278e-05	0.00273539	0	2.46893e-07	0.351721	0	0.922522	5.43936e-08	1.52337e-09	9.04362e-09	0
NR_136731.1	0	0	0	0	0	0	0.648647	0	0	0.551526	3.70468e-10	0	0.402743	0.374992	0	0	0.189998	0	0.653245	0
NR_045072.1	2.50648	1.1729	1.29598	1.19732	2.22316	1.10272	1.20546	1.17738	2.19017	1.90515	0.362368	2.92257	0.000696444	2.35697	0.732559	1.27986	1.91593	1.3457	0.934558	1.99332
NM_001244892.1	0	0	0	0	0	0	0	0	0	0	0	0	0	0	0	0	0	0	0	0
NM_001291703.1	0	0	0	0	0	0	0	0	0	0	0	0	0	0	0	0	0	0	0	0
NM_001144064.2	0	0	0	0	0	0	0	0	0	0	0	0	0	0	0	0	0	0	0	0
NM_001281730.1	0	0	0	0	0	0	0	0	0	0	0	0	0	0	0	0	0	0	0	0
NM_001291702.1	0	0	0	0	0	0	0	0	0	0	0	0	0	0	0	0	0	0	0	0
NR_136344.1	0	0.163046	0.429962	3.06589	0	3.41548	0.187803	5.58441	0	0	0	5.61227	2.27328	0.42779	4.91898	0.0191636	4.50947	0.323775	7.18067	3.29116
NR_138550.1	6.85682	5.08834	7.29511	5.80902	4.66211	7.47836	2.58925	8.00083	7.08441	0.881747	4.6603	8.70209	3.98031	4.84613	5.87403	4.15046	5.44265	2.84428	2.89275	9.7299
NR_138564.1	3.87096e-05	1.10987e-05	0.705746	1.12433	0	0	0	0	9.19571e-05	0	0	0	0	0	6.34506e-07	0	5.58574e-10	0.00484531	1.97334	1.02871
NM_001310219.1	0.0753655	0.163396	0.168847	0	0	0.0655402	0.120657	0	0	0.202609	0	0	0.107407	0.663253	0.0971095	0.165854	0.13761	0.298915	0.122475	0
NM_001330566.1	0.730864	1.40639	4.34663e-10	1.19925	0.758167	1.8236	0.000507896	1.17474	0.000173959	9.80074e-06	2.36485e-05	1.07312	0.000119726	2.05475	1.73089	0.481858	0.000145481	3.04527	0.113915	0.689358
NM_001330306.1	0	0	0	0	0	0	0	0	0	0	0	0	0	0	0	0	0	0	0	0
NM_001330565.1	1.02156	1.23146	0.226205	0.000386401	0.449028	1.06916	3.7181	1.69752	1.39769	4.08504	3.5865	0.531379	3.42678	0.432872	1.31346	0.674136	0.00187436	0.125013	5.76885	1.20737
NM_001320037.1	0	0	0	0	0	0	0	0	0.982294	0.0109494	0	0	0	0	0.813877	0	0	0	0	0
NM_001330567.1	1.08257	1.47128	0.780543	2.23145	1.83902	1.12723	0.342643	0.0213443	1.91462	2.44567	1.91951	0.510594	0.00655119	1.49682	0.367873	3.05582	0.00517475	0.00747347	2.16667	1.03973
NR_138571.1	0.296539	0	0.276263	0	0.0818664	0.047116	0.568804	0.0556785	0	0.307699	0	0.279344	0	0.370962	0.0176681	0.0849696	0.159805	0	0.33658	0
NR_138574.1	0.0654348	0	0.0423153	0	0	0.0048537	0.00441795	0.00716716	0	0.0864067	0	0.0560803	0	8.87127e-09	0	0.0184219	0.0320156	0	0.0777697	0
NR_138572.1	0	0.146116	0	0.233303	0	0	0	0	0	0	0	0.133423	0.477293	0	0.125847	0.0836359	0	0.600541	0.17362	0.172479
NR_138575.1	0.000187471	1.23107	0	0.780029	0.369655	0.121252	1.847	0.142836	0.386679	0.254871	0.776102	0.131025	1.20014	1.34243	1.08401	0.216851	0.102279	2.99797	0.987144	0.330804
NR_138612.1	5.57833	5.03276	3.09653	4.46684	5.22749	3.55608	7.48563	3.23498	7.19931	2.7085	5.09487	4.52853	5.37437	8.55045	3.07372	2.78462	5.88335	8.94044	3.27227	4.64472
NR_046228.1	0.406629	0.577747	0.444748	0.224539	0.297092	0.338243	0.6108	0.384495	0.141878	0.648689	0.442274	0.249728	0.621805	0.511479	0.880147	0.176927	0.377774	0.773887	0.35062	0.102061
NR_144301.1	0.235596	0.132643	0.150347	0.00239432	0.17358	0.0469559	0	0.0411425	0.0181574	9.01391e-09	1.44881	0.0326994	0	0.194653	0.320532	0.230496	0.149382	4.90977e-08	0.000176017	0.039968
NR_144303.1	0	0.160907	0	0.12664	0	0.000201186	0.371203	0.000420809	0	0	0	0	0.107965	0	0.00179051	0	0	0	2.88317e-06	0.0305649
NR_144310.1	1.5781e-09	1.07601	0.0398113	0.266047	0.230229	0.00685808	0.601538	0.0290395	0.287084	0.742223	0	0.088981	1.32059	1.04616	0.000173038	0.011657	0	2.072	0	0
NR_144305.1	0	0	0	0	0	0	0	0	0	0	0	5.1731e-05	0	0	0.505503	0	0	0	0.950571	0
NR_036619.1	0.28227	0.394837	0.412346	0.534583	0.279636	0.330813	1.20107	0.325609	0.036355	1.3585	0.478991	0.320386	0.305828	0.524345	0.202606	0.222212	0.725128	0.947609	0.326604	0.318903
NR_026956.1	0.450628	1.08944	0.583778	1.99345	1.22287	0.599713	2.92387	0.693161	0.412191	4.33146	1.92979	0.336684	1.25148	2.06497	1.11838	0.350654	0.725416	2.85852	1.09377	0.513063
NR_026814.1	0	0	0	0	0	0	0	0	0	0	0	0	0	0	0	0	0	0	0	0
NR_024160.1	0.130574	0.141545	0.0731336	0.281072	0.105827	0	0	0.0679598	0	0	0.102207	0.0662231	0	0	0.0841231	0	0.238416	0.129471	0	0
NR_024355.1	0.691651	1.85468	0.897113	0.888082	1.18015	0.538168	1.63182	1.06101	0.617367	1.0765	1.31075	0.701569	1.97141	1.86878	0.891203	0.640881	0.864084	1.87695	1.41978	0.47331
NR_024157.1	0.411328	3.3477	0.617196	3.17061	0.5116	0.538356	2.86824	0.596234	0.670251	2.89975	3.33433	0.58191	3.75823	3.32464	3.55559	0.609339	0.767709	4.21994	4.0622	0.471563
NR_026763.1	0.0378997	0.0414793	0.144845	0.112964	0.102547	0.134119	0.217624	0.040792	0.0480236	0.262901	0	0.360309	0.131388	0.186495	0	0.0424673	0.0475265	0.116734	0	0.146938
NM_052877.4	8.32029	2.68879	8.31308	8.24682	3.27535	7.4959	3.83767	13.0974	4.4867	1.10106	2.90678	16.431	5.44212	3.89695	0	6.93019	4.0567	2.90756	1.98782	5.10656
NR_102272.1	2.67022	2.3619	1.67838	1.43184	2.74713	1.84143	2.95548	2.86191	2.60464	2.34323	2.79206	2.58427	2.68698	2.22293	1.82202	2.33746	2.8672	3.63191	2.64197	2.25308
NR_123732.1	0	0.259868	0.00123109	0	0	0	0.519164	0.145197	0.168971	0	0	0	0	0	0	0	0	0	0	0
NR_072993.1	0	0	0	0	0.0455329	3.1864e-07	0.078246	0.0386435	0	0	0	0	0	0	0	0	0.0397947	0	0	0.0529556
NR_040101.1	0	0.693657	0	0	0	0	0	0	0	2.86507e-06	0	0.498115	0	1.4835	1.21355	0	0	1.28748	0	0.692188
NR_033119.2	0	0	0	0	0	0	0	0	0	0	0	0	0	0	0	0	0	0	0	0
NR_033118.2	0	0	0	0	0	0	0	0	0	0	0	0	0	0	0	0	0	0	0	0
NR_070308.1	0	0	0	0	0	0	0	0	0	0	0	0	0	0	0	0	0	0	0	0
NR_110381.1	0.0479558	0.0461576	0	0	0	0	0	0.0472708	0	0.102276	0	0.0500102	0	0	0	0.06102	0.0354114	0	0.0626111	0
NR_072992.1	0.0529056	0.456756	0	0.14653	0.040225	0.0667353	0.345253	0.160728	0	0.309138	0.572325	0	0.527788	0.540247	0.0681696	0.228364	0.124345	0.157376	0	0.0616913
NR_045513.1	1.19003	0	0.978257	0	0	0.977272	0	0.95288	0	0	0	0.96703	0	0	2.45591	1.36846	0.901418	2.56181	0	0.873143
NR_144319.1	0	0	0	0	0	0	0	0	0	0	0	0	0	0	0	0	0	0	0	0
NR_037664.1	0	0	0	0	0	0	0	0	0	0	0	0	0	0	0	0	0	0	0	0
NR_070309.1	0	0	0	0	0	0	0	0	0	0	0	0	0	0	0	0	0	0	0	0
NR_037663.1	0	0	0	0	0	0	0	0	0	0	0	0	0	0	0	0	0	0	0	0
NR_040762.1	0	0	0	0	0	0	0	0	0	0	0	0	0	0	0	0	0	0	0	0
NR_132374.1	0	0	0	0	0	0	0	0	0	0	0	0	0	0	0	0	0	0	0	0
NR_040035.1	0	0	0	0	0	0	0	0	0	0	0	0	0	0	0	0	0	0	0	0
NR_038258.1	0	0	0	0	0	0	0	0.0937259	0	0	0	0	0	0	0	0	0	0	0	0
NR_024433.1	0.201757	0.310054	0.0709136	0.272202	0.129669	0.247776	0.358567	0.0623252	0.189941	0.398365	0.339352	0.275607	0.481966	0.480124	0.745681	0.226608	0.0922154	0.426059	0.286553	0.17149
NR_002815.2	0	0.0196377	0.0449638	0.0259787	0	0.0473537	0	0.0610391	0	0.0272242	0.0619214	0.0227968	0.0676653	0.039978	0.0555265	0	0	0.0366495	0	0
NR_138604.1	48.7039	51.8038	32.6811	21.1877	70.6099	35.1336	38.7108	47.991	32.9642	39.8756	29.919	35.0294	41.9067	43.346	34.1451	46.0599	61.9614	22.4816	29.2417	33.8639
NR_144342.1	0	0.729834	0	0	0.00166026	0	0.00114453	0	1.78561e-06	1.13451e-08	0	0	0	0	0	0	0	0.000157667	0.00103482	0
NR_144340.1	0	0	0	0	1.18696	0	0.930798	0	0.00113386	6.30053e-06	0	0	0	0	0	0	0	0.0719848	2.08493	0
NR_144338.1	1.33325	0	2.59096	0.619061	0	0	3.12853	0	4.79572e-10	1.78115	0	0	0	1.94529	0	0	0.769937	0.968496	0	0
NR_144341.1	0	0	0	0	0.00495297	0	0.00348839	0	5.22292e-06	3.24531e-08	0	0	0	0	0	0	0	0.000436556	0.00366765	0
NR_144339.1	0	0.00359151	0	0	7.12545e-06	0	4.41414e-06	0	8.45529e-09	0	0	0	0	1.46163	0	0	0	9.81556e-07	1.88059e-06	0
NR_144318.1	8.92951	26.572	4.34818	6.85058	12.2925	1.76165	14.3455	5.46114	4.30201	9.6559	20.7454	5.35608	24.657	5.39759	3.99587	0.00775895	7.44529	9.50357	4.78728	3.3142
NR_144344.1	0	0	4.09482e-10	0.13273	0.413934	0	0	0	0.243627	0	0	0	0	0	0	0	0	0	3.72873e-07	3.7854e-10
NR_144348.1	0.273487	0.616205	0.389673	1.2094	0.184863	0	0.113097	0.330075	0.469127	0.59628	0.335546	0.335187	0.131965	1.36692	1.37478	0.155924	0.114958	2.48639	2.04649	0.251045
NR_144346.1	0	0	0	0.244015	0	0	0	0	0	0	0	0	0	0	0.0165412	0	0	0	0	0
NR_144345.1	1.5132e-06	4.62912e-06	1.54269e-10	0	0	0	0	0	0	0	0	0	0.323834	0	0.301802	0.0708132	0	0.48399	0	5.22802e-06
NR_144347.1	0	0	0	0	0	0	0	0	0	0	0.170551	0	0	0	4.92942e-08	0	0	0	0	0
NR_144349.1	0	0	0.801371	0	0	0.504009	0.995506	0.0840183	4.51631e-07	0	0	0.547099	1.03655	1.02996e-07	0.665036	0	1.20657	0.809051	0	0.0106996
NR_144358.1	0	0	0	1.20135	0.134654	0	0	0	0.102309	0	0.0111276	3.28688	1.17794e-09	0	0	0	0	0	1.31916	0
NR_144354.1	0.0650237	0	0	0	0.102132	0	0	0	0	0	0	0	0	0	0	0	0	0	0	0
NR_144355.1	0	0	0.137172	8.31956e-06	0	0	0.246005	0.0986752	0.0875742	0	0.354005	0.0946729	0	0	0	0	5.76449e-10	0.101965	0	0
NR_003929.2	0.459538	0.82228	0.347928	0.793998	0.312851	0.489171	1.24794	0.23313	0.214911	1.38147	0.807714	0.202755	0.89732	1.2622	0.441067	0.292253	0.293585	1.36146	0.904697	0.406383
NR_144317.1	0.244009	0.973326	0.267977	0.731781	0.560773	0.189761	0.341152	0.517218	0.261083	0	0.735418	0.466824	0.34066	0.35477	0	0.593173	0.769198	0	0.685463	1.11453
NR_130125.1	0	0	0	0	0.084889	0	0	0	0	0	0	0	0	0	0.0337395	0	0	0.103854	0.0851051	0.0567427
NR_144370.1	0	0	0	0	0	0	0	0	0	0	0	0	0	0	0	0	0	0	0	0
NR_144366.1	1.68002	3.701	2.19109	1.99917	0.40319	1.2098	3.06922	0.343737	1.41758	0.54868	2.34847	1.97132	4.22187	3.71436	3.25274	1.64351	0.788686	5.81674	2.55868	0.921718
NR_144369.1	5.8563	4.40768	1.63683	3.24088	11.1023	8.45267	10.8219	7.60444	11.7902	6.95058	7.80991	7.41848	2.27499	2.14241	3.94202	4.21202	10.2229	0	2.61925	11.2663
NR_027287.2	0.352691	0.635978	0.366322	0.606848	0.524617	0.455978	1.13622	0.422284	0.576762	1.14505	0.883842	0.349073	0.723679	0.666915	0.794677	0.396836	0.394173	1.09784	0.682939	0.427359
NR_144357.1	0	0	0	0.218055	0	0	0	0	0	0.105297	0	0	0.232944	0.141515	0	0	0.0964384	0	0.324259	0
NR_144326.1	0	0.279941	0.252037	0	1.86281e-09	0	0.315425	0	1.54433e-10	0.147115	1.00798e-08	0	0	0	0	0.148003	0.122623	0.796765	0	0
NR_144327.1	0	0.868647	0	0.593444	0	0.0229548	0.621552	0	0.318229	0.831736	0	0	0	0.875914	0.693043	6.81765e-07	0	0	0.950597	0
NR_144328.1	0	1.37517	0	1.84822e-08	0	0	0.996508	0.0368068	0.124758	0.0349757	0.418843	0.0880984	9.14685e-08	0	0.299791	0	0	1.32164	0.313484	0
NR_144329.1	0	0	0	0	0	0	0	0	0	0	0	0	0	0	0	0.248121	0	0	0	0
NR_144331.1	0	0	0	0	0	2.20184e-10	0	0	0	0	0	4.18471e-07	0	0.0016039	0.214986	0	0.0448184	0	0	0.175367
NR_144330.1	0	0	0	0	0.348256	0	0	0	0	0	0	0	0	1.38276	2.99942e-07	0	0	0	0	0
NR_144332.1	0	0	0	2.3853e-05	0	0	0.956037	0.0964654	0	1.77233	0.623284	0	0	0	0	0	0	0	1.64651	0
NR_144334.1	0	0	0	0	0	0	0	0	0	0	0	0	0	0	0	0	0	0	0	0
NR_144333.1	0	0	0	0	0	0	0	0	0	0	0	0	0	0	0	0	0	0	0	0
NR_144359.1	0	0	0	0	0	0	0	0	0	0	0	0	0	0	0	0	0	0	0	0
NR_123728.1	0	0	0	0	0	0	0	0	0	0	0	0	0	0	0	0	0	0	0	0
NR_003688.1	0	0	0	0	0	0	0	0	0	0	0	0	0	0	0	0	0	0	0	0
NR_023847.2	0	0	0	0	0	0	0	0	0	0	0	0	0	0	0	0	0	0	0	0
NR_004381.1	0	0	0	0	0	0	0	0	0	0	0	0	0	0	0	0	0	0	0	0
NR_002438.1	0	0	0	0	0	0	0	0	0	0	0	0	0	0	0	0	0	0	0.276688	0
NR_144383.1	0.106352	0.428616	0.0901061	0.355089	0.076437	0.0429023	0.332478	0.0799493	0.0846647	0.113491	0.400351	0.0957823	0.53005	0.377191	0.390474	0.0873575	0.0940699	0.509836	0.0428525	0.136322
NR_024187.2	1.9053	9.72463	2.4902	4.72018	2.69375	1.16067	4.45374	2.5502	1.54162	6.30135	4.9258	1.22346	6.00877	5.73633	3.46126	0	1.48089	11.1499	3.24223	1.76462
NR_144395.1	1.14672	2.54639	1.78316	1.13659	2.76585	2.17083	6.80477	2.24753	2.32163	5.0442	3.81406	1.36952	2.63468	3.55125	4.16257	1.02337	2.49401	5.44271	2.3386	2.58455
NR_144394.1	0.531916	1.83676	0.42716	3.06449	0	0.437914	0.310841	0.526465	0.396557	2.77648	1.06528	0.536766	1.34328	2.0514	0.965875	0.94499	0.475072	1.42371	2.46971	0.178813
NR_144393.1	1.97934	14.4136	2.46419	5.29296	2.91133	2.4712	5.76881	2.42341	0	0.565279	9.87602	2.84205	7.62802	6.98939	0.837114	0.860145	3.23708	13.0361	0.795609	2.99976
NR_144402.1	19.0984	43.7837	30.1365	27.8779	33.6411	23.8709	27.6054	27.5807	12.8983	22.7704	37.9978	41.7528	31.0315	32.8133	18.5509	14.7944	28.1836	38.9518	20.2296	18.5828
NM_001252608.1	0.341717	1.20801	0.360364	1.42053	0	0.0704119	0.800073	0	0.128259	0.60938	0	0.257887	0.474922	0.595448	1.04408	0.349607	0.143986	0.028924	1.50911	0
NM_006574.3	0.983688	7.69114	1.02321	8.13508	0.949119	1.03876	6.82416	0.999582	0.883875	6.76048	7.32249	1.18785	8.34869	10.6799	11.118	1.7782	1.00497	8.3626	10.3047	0.9897
NR_033670.1	0	0	0	0	0	0	0	0	0	0	0	0	0	0	0	0	0	0	0	0
NR_073519.1	0	3.14431e-08	0	5.99355e-08	1.99967e-07	0	0	0	0	0	0	0	2.42139e-09	1.85879	0	0	0	3.15183e-07	0	0
NR_036565.1	2.02296	14.2685	1.81757	9.37118	1.11205	1.44501	6.53547	3.35484	5.66415	4.7397	6.41074	1.68949	6.93283	6.9353	7.40889	4.08902	2.36685	11.696	6.5704	4.12598
NR_036571.2	0.0854989	0	0.21255	0.11724	0	0	0	0	0	0.0962937	0.0951501	0	0.216447	0.55282	0	0	0.172321	0	0	0.116095
NR_029462.1	0	0	0	0	0	0	0	0	0	0	0	0	0	0	0	0	0	0	0	0
NR_033488.1	0.639155	1.49375	0.475992	1.06383	0.664522	0.243053	1.76728	0	0.171129	0.630017	0	0.371955	0.765205	0.832851	2.43595	0.597051	0.00404817	4.48478e-10	1.32638	0.466601
NR_103502.1	0	0	0	0	0.0376835	0	0	0	0	0	0	0	0	0.0340985	0	0	0	0	0	0
NR_033489.1	1.47777	10.698	2.23016	1.67711	3.8513	1.38929	5.06148	3.42282	2.63161	10.0272	4.80475	1.15513	6.98961	6.32166	10.8604	1.10315	2.56428	4.34411	8.54589	1.10379
NR_027997.1	0	0	0	0	0	0	0	0	0	0	0	0	0	0	0	0	0	0	0	0
NR_027261.1	18.9069	16.5575	20.6686	15.3018	16.6484	22.8733	12.869	17.736	17.568	8.81497	7.46348	26.1787	16.2111	18.6166	14.9882	14.9545	17.2021	6.88512	9.61528	18.5905
NR_027780.1	0.0479693	0.0304455	0.0815855	1.91187	0.00801158	3.54435	1.8059e-05	0.184339	0.00609949	0.0386836	5.30971e-10	0.325383	0.0013878	0.00242095	9.46491e-05	0.298781	0.0535022	2.5029e-05	4.73276e-05	0.000118333
NR_036564.1	0.731772	7.79159	2.90545	4.87186	1.3357	1.72935	7.72219	2.14055	1.14198	12.537	6.72472	1.4527	2.85807	8.35228	3.06213	1.08619	2.21177	6.96535	4.95004	1.82501
NR_028000.1	0	0	0	0	0	0	0	0	0	0	0	0	0	0	0	0	0	0	0	0
NR_029461.1	0	0	0	0	0	0	0	0	0	0	0	0	0	0	0	0	0	0	0	0
NR_029413.1	0	0	0	0	0	0	0	0	0	0	0	0	0	0	0.476823	0	0	0	0.200458	0
NR_027996.1	0	0	0	0.121726	0	0	0	0	0	0	0	0	0	0	9.49673e-08	0	0	1.68001e-06	4.90771e-08	0
NR_027998.1	0	0	0	0	0	0	0	0	0	0	0	0	0	0	0	0	0	0	0	0
NR_033669.1	0	0	0	0	0	0	0	0	0	0	0	0	0	0	0	0	0	0	0	0
NR_049728.1	4.42525	6.58238	3.95927	1.59979	9.9485	5.31091	0	1.23059	2.14193	0	0	0	3.06248	5.64317	0	0	2.17722	7.62753	0	0
NR_046353.1	0	0.0223405	0	0.029575	0	0	0	0	0	0	0	0	0	0	0	0	0	0	0	0
NR_002448.1	0	0	0	0	0	0	0	0	0	0	0	0	0	0	0	0	0	0	0	0
NR_045382.1	0	0.161519	0.171709	0.427671	0	0.0694954	0	0.0757235	0	0.0977823	0.113883	0	0.251293	0.106699	0	0.084907	0	0.152107	0.138903	0
NR_002216.1	0	0	0	0	0	0	0	0	0	0	0	0	0	0	0	0	0	0	0	0
NR_046653.1	0	0	0	0	0	0	0	0	0	0	0	0	0	0	0	0	0	0	0	0
NR_001571.2	0	0	0	0	0	0	0	0	0	0	0	0	0	0	0	0	0	0	0	0
NR_051987.1	0	0	0	0	0	0	0	0	0	0	0	0	0	0	0	0	0	0	0	0
NR_023363.1	0	0	0	0	0	0	0	0	0	0	0	0	0	0	0	0	0	0	0	0
NR_103791.1	0	0	0	0	0	0	0	0	0	0	0	0	0	0	0	0	0	0	0	0
NR_027795.1	0.301832	3.88532	0.650232	2.68554	0.524381	0.406829	1.40774	0.558878	0.174077	1.45675	2.64644	0.348402	2.64213	2.41212	1.48327	0.269062	0.458761	2.73505	1.52081	0.317984
NR_002718.2	0.406719	0.357581	0.232943	0.34426	0.363975	0.209134	0.341858	0.196437	0.143045	0.723473	0.525564	0.263871	0.245867	0.48954	0.485847	0.204068	0.297319	0.666663	0.241717	0.228753
NR_039977.1	0	0	0	0	0	0	0	0	0	0	0	0	0	0	0	0	0	0	0	0
NR_038281.1	0	0	0	0	0	0	0	0	0	0	0	0	0	0	0	0	0	0	0	0
NR_023367.1	0	0	0	0	0	0	0	0	0	0	0	0	0	0	0	0	0	0	0	0
NR_036546.1	0	0	0	0	0	0	0	0	0	0	0	0	0	0.0313912	0	0	0	0	0	0
NR_038949.1	0	0	0	0	0	0	0	0	0	0	0	0	0	0	0	0	0	0	0	0
NR_023376.1	0	0	0	0	0	0	0	0	0	0	0	0	0	0	0	0	0	0	0	0
NR_003573.1	0.253721	3.0136	0.550677	1.35868	1.31105	1.01309	2.01409	0.89738	1.04629	1.74207	2.77051	0.710466	2.18797	3.28593	0.562816	0.421138	0.78843	2.60344	1.59525	0.645755
NR_049775.1	0	0	0	0	0	0	0	0	0	0	0	0	0	0	0	0	0	0	0	0
NR_038947.1	0	0	0	0	0	0	0	0	0	0	0	0	0	0	0	0	0	0	0	0
NR_001526.1	0	0	0	0	0	0	0	0	0	0	0	0	0	0	0	0	0	0	0	0
NR_046622.1	0	0	0	0	0	0	0	0	0	0	0	0	0	0	0	0	0	0	0	0
NR_104033.1	0	0	0	0	0	0	0	0	0	0	0	0	0	0	0	0	0	0	0	0
NR_002580.1	0	0	0	0	0	0	0	0	0	0	0	0	0	0	0	0	0	0	0	0
NR_003137.2	0	0	0	0	0	0	0	0	0	0	0	0	0	0	0	0	0	0	0	0
NR_002727.2	0.979817	1.05318	1.379	1.20189	1.1419	1.03271	1.75831	1.43196	1.56599	1.73917	1.6389	1.22918	1.29978	1.05255	1.45967	1.25288	1.31909	1.9995	1.49343	1.48407
NR_037925.1	0	0	0.103313	0	0	0.0211451	0.174991	0.025783	0	0.0852176	0.0878286	0.0308416	9.33551e-07	0.0563215	0.244462	0.0861389	0	0.509044	0.134043	0.105044
NR_038913.1	0.140527	0.609337	0.0524722	0.672216	0.759295	0.325884	0.374963	0.390081	0.28372	0.125929	0.219997	0.190056	0.333786	0.274823	0.301785	0.103084	0.256589	0.650252	0.228368	0.406031
NR_002160.1	0	0	0	0	0	0	0	0	0	0	0	0	0	0	0	0	0	0	0	0
NR_040019.1	7.46384	5.7151	6.15236	5.55763	7.98963	5.08241	3.94553	4.25119	5.71496	5.77354	5.51167	4.64251	5.61959	7.8492	5.353	5.57843	6.55701	5.89751	4.80598	4.7302
NR_024463.1	0	0.0661163	0	0.0927515	0	0	0.114187	0	0	0.241133	0.13207	0.0277477	0.140024	0.0788175	0.0396764	0.0908902	0.0287786	0.200536	0.0823847	0
NR_002948.1	0	0.0567567	0	0	0	0	0.332199	0	0	0.069729	0.0812109	0.0526188	0.0739295	0.152175	0	0	0	0	0	0
NR_023362.1	0	0	0	0.136185	0	0	0	0	0	0	0	0	0.135245	0	0	0.10442	0	0	0.308437	0
NR_037877.1	0.146705	0.0795156	0.0821684	0.421061	0.118901	0.0637895	0.117434	0.0763555	0.0888579	0	0.344502	0	0.209076	0.322768	0.0945156	0.242136	0.267869	0	0.238408	0
NR_002144.1	0	0.0396057	0.041481	0	0.0591131	0	0.0586837	0.0383182	0.0441749	0.0493274	0	0.14945	0	0	0.0947311	0.0403588	0.0331868	0.0721489	0	0
NR_026575.1	0	0	0	0	0	0.032602	0	0	0	0	0	0.0401284	0	0	0	0.0377739	0	0	0	0
NR_102684.1	3.41852	2.72482	3.4915	2.30861	2.44469	2.3608	6.27776	3.03518	1.09619	6.35204	3.9351	1.22384	3.2957	4.12927	2.46151	1.65949	3.21275	3.98782	2.12412	3.05034
NR_024616.1	1.00468	1.69271	1.05839	1.93647	1.15048	1.07974	1.26045	1.13185	0.504806	2.01361	2.17604	1.15054	2.20178	1.52431	1.4586	0.914943	1.37766	3.56943	1.51774	0.580808
NR_037144.1	6.17895	9.48344	6.34869	7.53158	5.01442	5.55692	7.63963	5.66113	7.69879	6.51886	9.25502	5.4797	9.26556	9.16114	6.50088	5.71179	6.53924	12.8025	7.13539	6.34864
NR_024592.1	0	0.0527392	0	0	0	0	0	0	0	0	0	0	0	0	0	0	0	0	0	0
NR_002812.3	0	0.16219	0	0.0715707	0.0808421	0	0	0	0	0.067038	0	0	0.0710764	0.146302	0.192786	0	0.0455317	0.29671	0.162096	0.0540376
[truncated: 158,024 more rows]

## Sheet: Inhibitor
	Cytosol-Control_A	ER-HT_A	ER-HT_B	Cytosol-HT_B	ER-Control-B	ER-DTT_B	Cytosol-DTT_A	ER-Background_B	Cytosol-HT_A	ER-Background_A	Cytosol-Background_A	Cytosol-Control_B	ER-HT_A	Cytosol-DTT_B	ER-Control_A
spike-in700	24060.5	4639.03	6977.52	14694	7628.2	5061.32	30232.3	20133.7	22536.9	11538	8722.62	13209.3	4428.21	10668	8682.4
spike-in9000.42	0.352432	0.294729	0	0.285146	0.436815	0.0625969	0.342183	0	0.298091	0.0571821	0	0.153673	0.251322	0.0755934	0.109634
spike-in12000.415	0	0	0	0.0328946	0	0	0	0	0.0294711	0.0395775	0.0680884	0.0265904	0	0	0
NR_037885.2	0	0	0	0	0	0	0	0	0	0	0	0	0	0	0
NR_038935.1	0.125884	0.819208	1.1407	0.297377	0.450876	0.699323	0.237847	0.201836	0.361424	0.188061	0.807494	0.624935	0.833814	0.405758	0.210765
NR_026929.1	0	0	0	0	0	0	0	0	0	0	0	0	0	0	0
NR_026674.1	0.0451175	0.227942	0.358111	0.0191085	0.168766	0.125574	0.103118	0.0800642	0.0410057	0.0229587	0.356272	0.04689	0.302626	0	0.132556
NR_024447.1	0.664594	2.4435	3.69326	0.280255	1.0415	2.23308	0.216889	2.16676	0.427313	1.49497	2.26748	0.343608	2.16899	0.129805	2.34434
NR_026900.1	0.159701	0.596203	0.6224	0.0928043	0.870322	0.942832	0	0.987273	0.0474963	0.813427	0.630546	0.053579	0.245109	0.0105428	0.733994
NR_024491.1	0.708463	2.22116	2.46215	0.296321	2.58545	0.593444	0.78364	2.28935	0.256645	0.93006	1.91899	0	1.6596	0.398382	2.53483
NR_034032.1	5.13947	3.79028	4.58991	2.63227	3.82625	2.84754	6.17236	8.87408	4.88349	3.05361	5.05434	1.06379	2.73122	1.56992	5.9637
NR_024492.1	0.864746	6.67933	7.60817	0.802705	4.18084	5.12226	0.517004	3.29135	0.66442	2.37844	6.35622	0.978755	5.43365	0.343352	5.52886
NR_036530.1	1.11639	4.34376	7.00296	0.253842	5.73748	3.6898	0.611628	2.49752	1.12561	1.30369	5.10306	0.667069	3.39756	0.427892	4.60921
NR_026806.1	0.180369	0.229041	0.723648	0.0484707	0.474329	0.286586	0.303273	0.0505228	0	0.115901	0.199217	0.098331	0.445285	0.0383057	0.472257
NR_036505.1	0.231264	2.04706	1.97854	0.382756	1.34458	1.78415	0.133553	0.868	0.185875	0.605364	2.22955	0.560345	1.04952	0.174804	1.29418
NR_027046.1	0	0	0	0	0.08094	0	0	0.150872	0	0	0	0	0.0542742	0	0.189615
NR_024440.1	0	0.305019	1.14723	0	0.131681	1.24767	0.205267	0.845052	0.0898186	0	1.61882	0.472537	0.334939	0	0.305509
NR_024456.1	1.33893	3.60092	4.99173	0.352506	2.79519	2.04064	0.902943	2.61386	0.270051	1.5073	3.70687	0.395877	4.35159	0.16713	5.36789
NR_037869.1	0.110531	0.430378	0.263726	0.0990644	0.287426	0.839366	0	0.293722	0.0887254	0.119679	0.371245	0.0160141	0.421181	0.0474868	0.322434
NR_024413.1	0.124834	0.0524276	0.448793	0	0.216529	0.0659622	0.0299633	0.162814	0.0146818	0.0984269	0.142644	0	0.365836	0	0.404598
NR_034085.1	4.74022	11.9046	14.306	4.43235	8.85136	11.0423	2.59275	4.82141	3.7676	4.37917	8.31728	4.70905	10.6722	2.50583	9.69794
NR_026817.1	0.0301415	0	0	0	0	0	0	0	0	0	0	0	0.0429567	0	0
NR_026776.1	2.17681	2.73221	6.61724	1.46827	2.24902	3.54502	0.880383	3.28529	1.84104	1.35423	4.75666	1.22631	4.2657	0.934075	3.66927
NR_039988.1	0.259621	0.267122	0.599748	0.0854498	0.233279	0.216883	0.200149	0.193393	0.28609	0.131039	0.514827	0.0899239	0.130664	0.0762208	0.277578
NR_036520.1	5.14168	3.56418	4.74363	2.68341	3.78937	5.58513	2.79497	4.60873	3.29629	4.09479	4.17088	2.97877	4.04963	1.79733	4.91489
NR_034022.1	0.346337	1.18296	2.02079	0.324743	1.05697	0.926648	0.175072	0.756148	0.242872	0.750536	1.6501	0.433073	1.99642	0.228	1.86048
NR_046370.1	0	0	0	0	0	0	0.639773	0.152831	0.391521	0	1.04751	0.345814	0	0	0
NR_073494.1	0.0782725	0.130991	0	0.0844723	0.0554529	0	0	0	0	0	0	0	0	0	0
NR_026885.1	0.119845	0.658994	1.21438	0.0554304	0.800536	0.486662	0.0830909	0.833305	0.21513	0.525585	0.916974	0.119473	0.731997	0.0587722	0.809826
NR_046273.1	0.0726896	0.226484	0.417586	0	0.242247	0.209712	0.105027	0.0588413	0.0389416	0.1441	0	0	0.671989	0.015024	0.338811
NR_046216.1	0.686117	2.14802	2.08521	0.760196	1.61173	1.60527	0.283893	1.53049	0.367849	1.17431	2.10281	0.573804	1.4046	0.280113	2.11019
NR_105012.1	0	0	0	0	0	0	0	0	0	0	0	0	0	0	0
NR_026880.1	0	0	0	0	0	0	0	0	0	0	0	0	0	0	0
NR_026923.1	0.0341711	0.0528883	0.0681485	0.017757	0.0461127	0.0229926	0	0.0225173	0.0339518	0	0.110274	0.0144834	0.165155	0.0281269	0.0420495
NR_046415.1	0	0	0	0	0	0	0	0	0	0	0	0	0	0	0
NR_046369.1	0	0	0	0.1285	0	0	0	0	0	0.153529	0	0.000125756	1.68318	0	0
NR_036511.1	0.632065	3.16719	3.44627	0.177602	2.13747	2.84571	0.346097	0.962428	0.318133	0.925869	3.67255	0.24258	3.85437	0.141089	2.9682
NR_003671.2	0.19098	0.742758	0.510993	0.287026	0.878745	1.16459	0.0273185	0.0301201	0.157762	0.218884	0.854939	0.204508	0.853291	0.20353	0.256841
NR_038320.1	0.203804	0.653719	0.963727	0.0916445	0.601612	0.675873	0.181337	0.307585	0.213408	0.308704	0.720127	0.177776	0.871366	0.145754	0.549656
NR_003275.2	0	0	0	0	0	0	0	0	0	0	0	0	0	0	0
NR_034130.1	0.0294541	0.024646	0.0895367	0.0476806	0	0	0.0571791	0.117626	0.185052	0.038241	0.131462	0.0256924	0	0	0.10999
NR_027053.2	0.8396	1.89095	3.61084	0.454222	1.33018	1.65627	0.314407	1.55354	0.463435	1.10339	2.0385	1.03559	2.90565	0.573489	3.02341
NR_077244.1	0.111425	0	0	0	0	0	0	0	0	0	0	0	0	0	0
NR_073404.1	0.268766	0.317998	0.377618	0.0210092	0.126217	0.199498	0.0966539	0.842028	0.115932	0.195989	0.39452	0.00683587	0.510395	0.0358147	0.765958
NR_038921.1	0	0	0	0	0	0	0	0	0	0	0	0	0	0	0
NR_026854.1	0.044924	0.232049	0	0.0244866	0.191943	0.196619	0.0219883	0.0771678	0.0654185	0.175781	0.2068	0.0199577	0.259819	0	0.141252
NR_036533.1	0.17418	0.224227	0.325838	0.0144597	0.20883	0.361814	0	0.166825	0.0777037	0.0695823	0.299006	0.116873	0.267332	0.0114986	0.150101
NR_103451.2	0.106837	0	0	0	0	0	0	0	0	0	0	0	0	0	0
NM_001243523.1	0	0	0	0	0	0	0	0	0	0	0.476904	0.0932043	0	0	0
NR_038931.1	0	0	0.106246	0	0	0	0	0	0	0.0419562	0	0	0.0850032	0	0
NR_110396.1	0.653075	2.05927	2.14125	0.444284	1.42825	1.28005	0.287066	0.978549	0.481861	1.39277	2.37343	0.355489	2.61976	0.204972	1.39402
NR_038401.1	0	0	0.0651852	0	0.0911506	0	0	0	0	0	0	0	0	0	0.0200189
NR_027354.2	0.0441397	0.3871	0.719849	0.0888253	0.160222	0.465616	0	0.486942	0.299694	0	0.0849549	0.0772406	0.519271	0	0.339773
NR_027311.1	0	0	0	0	0	0	0	0	0	0	0	0	0	0	0
NM_001257177.1	0	0	0	0	0.0205813	0	0	0	0	0	0	0	0	0	0
NR_026954.1	0.0241303	0.403826	0.513472	0.0130208	0.188049	0.411548	0.0468441	0.314105	0.0233237	0.250632	0.457727	0.0315728	0.275118	0.0414175	0.315383
NR_036538.1	0	0.0298565	0.216932	0	0	0.0253561	0.0173168	0.10097	0.0344883	0	0.0398136	0.0622481	0.0508515	0	0.0222072
NR_002186.1	2.23296	6.70624	9.95562	1.66734	5.40433	4.54602	1.00756	4.57687	1.79666	4.29382	7.40741	2.12677	5.60782	0.963348	6.17501
NR_003542.1	0.197153	0	0.399548	0	0.186234	0	0	0.148774	0.0635211	0	0.293317	0	0	0	0.163606
NR_015444.1	0	0	0	0	0	0	0	0	0	0	0	0	0	0	0
NR_024013.1	0	0	0	0	0	0	0	0	0	0	0	0	0	0	0
NR_024365.1	0	0	0	0	0	0	0	0	0	0	0	0	0	0	0
NR_027312.1	0.0148969	0	0	0	0	0	0	0	0.0287979	0.019341	0.160547	0	0	0	0.0185874
NR_027417.1	0.138182	0.39102	0.136501	0.107655	0.335375	0.119814	0.049912	0.243741	0.0480855	0.0644558	0.474948	0.0631365	0.437059	0.0712186	0.134792
NR_110209.1	0	0	0	0	0	0	0	0	0	0	0	0	0	0	0
NR_039980.1	1.21849	3.69007	5.87792	0.903613	3.31216	3.20838	1.09412	3.63155	0.814479	2.19197	4.85851	1.73451	4.66344	0.896884	4.08501
NR_033896.1	3.57439	1.78767	2.58113	1.0198	1.16428	1.86857	1.31601	2.09271	2.46212	2.34703	1.65036	1.97108	1.28817	1.62193	1.38081
NR_026998.1	0	0.138664	0.0839589	0	0.0587012	0	0.160851	0.0937877	0	0	0.0924541	0.0361378	0	0	0.154707
NR_026964.3	0.0188794	0.010532	0	0	0	0	0	0	0	0	0.0421513	0	0.0717525	0	0
NR_030728.1	0.092333	0.114966	0.108444	0.0286605	0.0669242	0	0	0.0858879	0	0.0955583	0.248808	0	0.058797	0.0231744	0.264048
NR_109948.1	0.1519	0.237383	0.21523	0.0756189	0.262149	0.287762	0.0701728	0.421552	0.107907	0.291319	0.16553	0.0614526	0.150801	0.0902888	0.270677
NR_027240.1	0.106305	0.33768	0.71455	0.0588836	0.37855	0.550532	0.101238	0.22701	0.1136	0.18029	0.630834	0.0271604	0.77895	0.0403366	0.296959
NR_033748.2	0	0	0	0	0	0	0	0	0	0	0.046519	0	0	0	0
NR_026657.1	0.292654	0	0.296544	0.315835	0.207334	0.41594	0.568129	0	0	0	0	0.127639	0	0	0.364285
NR_046107.1	0.0779416	0.014493	0.148317	0.00934614	0.0490831	0.0615422	0.0672479	0.0392104	0	0.0674624	0	0.00755416	0	0	0.0538993
NR_102268.2	0	0	0	0	0	0	0	0	0	0	0	0	0	0	0
NR_034127.1	2.2628	6.77425	9.29003	1.74139	5.31381	6.74416	1.73342	4.15513	2.0826	2.49893	6.42084	1.45391	5.31939	0.834591	5.60676
NR_036691.1	0	0	0	0	0	0	0	0	0	0	0	0	0	0.0492034	0
NR_026877.1	0	0.051999	0.125938	0	0	0.0220805	0	0	0	0	0.0346703	0.040655	0.0885645	0	0.0773535
NR_026967.1	0.797858	1.52464	2.92826	0.109271	1.41609	1.63048	0.29476	1.77187	0.619995	1.42646	2.04762	0.406025	1.82368	0.276991	1.80368
NR_027282.1	1.08137	1.70601	1.87702	0.689614	1.22773	1.66487	0.590678	1.31678	0.554277	1.23431	2.26853	0.845684	1.44775	0.703055	1.53893
NR_104171.1	0.0143777	0	0	0	0	0.183912	0	0	0.0277943	0	0	0.0125415	0.122944	0	0.0357938
NR_110248.1	0.134114	0.38362	0.353155	0.162846	0.268902	0.131691	0.28899	0.19353	0.201417	0.148284	0.611518	0.0832164	0.270269	0.0807958	0.423515
NR_110737.1	0	0	0	0	0	0	0	0	0	0	0	0	0	0	0
NR_110738.1	0	0	0	0	0	0	0	0	0	0	0	0	0	0	0
NR_110804.1	0.248807	0.244256	0.358731	0.0701352	0.212777	0.0956162	0.109973	0.232937	0.115474	0.111135	0.320971	0	0.103122	0.0130311	0.319686
NR_120363.1	0.275844	0.726299	1.13946	0.0165627	0.459468	0.295621	0.155074	0.636073	0.158299	0.203589	0.832596	0.0388452	0.537936	0.229493	0.74958
NR_120402.1	0	0	0	0	0	0	0	0	0	0	0	0	0	0	0
NR_024498.1	0.218671	1.08196	1.10903	0.1839	0.731245	0.918931	0.28895	0.226805	0.154233	0.267209	0.891901	0.161686	0.875716	0.228212	0.827907
NR_120424.1	0.723	1.14456	1.68534	0.307924	0.764164	1.06569	0.380236	0.812786	0.559989	0.42782	1.73195	0.141673	1.52321	0.313481	1.10273
NR_120422.1	0	0	0	0	0	0	0	0	0	0	0	0	0	0	0
NR_120450.1	0.0661985	0.023037	0.0761247	0	0	0	0	0.0155842	0.0266025	0	0.0307028	0	0	0	0
NR_120606.1	0	0	0	0	0	0.0478119	0	0	0	0	0	0	0	0	0
NR_120653.1	0.18919	0.119727	0.161069	0.0186763	0	0.126436	0.0750248	0.211306	0.0341065	0.0674624	0.299584	0	0.209226	0.105308	0.285974
NR_121579.1	0.44298	0.856988	2.05656	0.178171	0.950264	1.57259	0.0390671	0.223386	0.474704	0.650873	2.30332	0	0.709037	0.07141	1.11684
NR_121582.1	0.104154	0.271297	0.602323	0.0475108	0.168515	0.28131	0.124597	0.157237	0.0738204	0.274005	0.32351	0.0380761	0.251628	0	0.185612
NR_121623.1	0	0	0	0	0	0	0	0	0	0	0	0	0	0	0
NR_122121.1	4.98853	4.68017	5.66754	1.95769	3.21288	2.68562	2.05423	4.27772	2.48395	3.23837	3.20484	2.76909	2.36983	1.23246	3.95152
NR_125390.1	0	0	0.0313697	0	0	0	0	0.0350421	0	0	0	0	0	0	0
NR_125428.1	0	0	0.536661	0	0.386062	0	0	0	0	0	0	0	0	0	0.0765257
NR_125855.1	0.400413	0.512227	0	0	0.10892	0.433461	0.225577	0	0.305655	0.507753	0.686453	0	0.434011	0	0
NR_125868.1	0	0	0	0	0	0	0.0481345	0	0	0	0	0	0.282697	0	0
NR_125862.1	0	0	0	0	0	0	0	0	0	0	0	0	0	0	0
NR_125894.1	0	0	0	0	0	0	0	0	0	0	0.0727658	0	0	0	0
NR_125895.1	0	0	0	0	0	0	0	0	0	0	0	0	0	0	0
NR_125909.1	0.0116993	0	0.0711286	0.0126259	0.0497307	0.0166278	0.0113559	0.0397277	0.0339246	0	0.0783257	0.0306153	0.0333469	0	0.0147837
NR_039650.1	0	0	0	0	0	0	0	0	0	0	0	0	0	0	0
NR_120521.1	0	0.0559809	0	0	0.142192	0	0.0324691	0.0378636	0	0	0.149301	0	0	0	0
NR_039766.1	0	0	0	0	0	0	0	0	0	0	0	0	0	0	0
NR_037436.1	0	0	0	0	0	0	0	0	0	0	0	0	0	0	0
NR_036243.1	0	0	0	0	0	0	0	0	0	0	0	0	0	0	0
NR_028471.1	0	0	0	0	0	0	0	0	0	0	0	0	0	0	0
NR_027251.1	0.0424652	0.675132	0.430297	0.0687432	0.481358	0.784608	0.0412188	0	0	0.330802	0.615986	0	0.786762	0.0182219	0.475732
NR_047029.1	0	0	0	0	0	0	0	0	0	0	0	0	0	0	0
NR_047015.1	0	0	0	0	0	0	0	0	0	0	0	0	0	0	0
NR_046547.1	0	0	0	0	0	0	0	0	0	0	0	0	0	0	0
NR_039784.2	0	0	0	0	0	0	0	0	0	0	0	0	0	0	0
NR_045529.3	0	0	0	0	0	0	0	0	0	0	0	0	0	0	0
NR_110525.1	0	0	0	0	0	0	0	0	0	0	0	0	0	0	0
NR_037839.1	0	0	0	0	0	0	0	0	0	0	0	0.0445969	0	0	0
NR_003082.1	0.0674989	0.3911	1.34853	0.0934636	0.146922	0.126707	0.2789	0.24193	0.153173	0.1192	1.08473	0.197919	0.17753	0	0.424716
NR_125932.1	0	0.248968	0.201446	0	0	0.10566	0	0.0279461	0	0.128676	0	0	0	0	0.030892
NR_037184.1	0	0	0	0	0	0	0	0	0	0	0	0	0	0.0767845	0
NR_103717.1	0	0	0	0	0	0	0	0	0	0	0	0	0	0	0
NR_027080.2	0	0.0927445	0	0	0.0392619	0	0	0.0313646	0.107133	0.0719515	0.0618373	0.0241705	0	0	0
NR_126347.1	0	0	0	0	0	0	0	0	0	0	0	0	0	0	0
NR_126360.1	0	0	0	0	0	0	0	0	0	0	0	0	0	0	0
NR_126379.1	0	0.597488	0	0	0	0	0	0	0	0	0	0.0622855	0	0	0
NR_126377.1	0	0	0	0	0	0	0	0	0	0	0	0	0	0	0
NR_126390.1	0.365933	0.583729	0.393893	0.101064	0.396222	0.312517	0.149421	0.326324	0.197826	0.281965	0.779358	0.0783836	1.16763	0.0579501	0.499753
NR_126392.1	0.186235	0	0	0	0	0	0	0	0	0	0	0	0	0	0
NR_126452.2	0.597142	0.461526	1.21595	0.170495	0.667988	0.537371	0.272298	0.3307	0.262199	0.646321	0.674372	0.134861	0.82411	0	1.37234
NR_049849.1	0	0	0	0	0	0	0	0	0	0	0	0	0	0	0
NR_049883.1	0	0	0	0	0	0	0	0	0	0	0	0	0	0	0
NR_049882.1	0	0	0	0	0	0	0	0	0	0	0	0	0	0	0
NR_027695.1	0	0	0	0	0	0	0	0	0	0	0	0	0	0	0
NR_125806.1	0.634391	1.43637	1.58815	0.563821	0.79313	1.21986	0.543327	0.422398	0.504977	0.920545	1.1659	0.52082	0.531832	0.89672	0.836117
NR_003945.1	0.0967604	0.380015	0.342511	0.0537146	0.205928	0.281225	0.0882115	0.172692	0.0989811	0.169465	0.404697	0.0987545	0.31385	0.0302076	0.243058
NR_031690.1	0	0	0	0	0	0	0	0	0	0	0	0	0	0	0
NR_030384.1	0	0	0	0	0	0	0	0	0	0	0	0	0	0	0
NR_031735.1	0	0	0	0	0	0	0	0	0	0	0	0	0	0	0
NR_030194.1	0	0	0	0	0	0	0	0	0	0	0	0	0	0	0
NR_030307.1	0	0	0	0	0	0	0	0	0	0	0	0	0	0	0
NR_039793.1	0	0	0	0	0	0	0	0	0	0	0	0	0	0	0
NR_030337.1	0	0	0	0	0	0	0	0	0	0	0	0	0	0	0
NR_036145.1	0	0	0	0	0	0	0	0	0	0	0	0	0	0	0
NR_036143.1	0	0	0	0	0	0	0	0	0	0	0	0	0	0	0
NR_031658.1	0	0	0	0	0	0	0	0	0	0	0	0	0	0	0
NR_030363.1	0	0	0	0	0	0	0	0	0	0	0	0	0	0	0
NR_030356.1	0	0	0	0	0	0	0	0	0	0	0	0	0	0	0
NR_031642.1	0	0	0	0	0	0	0	0	0	0	0	0	0	0	0
NR_031708.1	0	0	0	0	0	0	0	0	0	0	0	0	0	0	0
NR_030589.1	0	0	0	0	0	0	0	0	0	0	0	0	0	0	0
NR_030581.1	0	0	0	0	0	0	0	0	0	0	0	0	0	0	0
NR_039659.1	0	0	0	0	0	0	0	0	0	0	0	0	0	0	0
NR_031604.1	0	0	0	0	0	0	0	0	0	0	0	0	0	0	0
NR_031746.1	0	0	0	0	0	0	0	0	0	0	0	0	0	0	0
NR_030408.1	0	0	0	0	0	0	0	0	0	0	0	0	0	0	0
NR_030309.1	0	0	0	0	0	0	0	0	0	0	0	0	0	0	0
NR_031677.1	0	0	0	0	0	0	0	0	0	0	0	0	0	0	0
NR_030331.1	0	0	0	0	0	0	0	0	0	0	0	0	0	0	0
NR_030628.1	0	0	0	0	0	0	0	0	0	0	0	0	0	0	0
NR_037442.1	0	0	0	0	0	0	0	0	0	0	0	0	0	0	0
NR_030760.1	0	0	0	0	0	0	0	0	0	0	0	0	0	0	0
NR_039933.1	0	0	0	0	0	0	0	0	0	0	0	0	0	0	0
NR_030289.1	0	0	0	0	0	0	0	0	0	0	0	0	0	0	0
NR_031715.1	0	0	0	0	0	0	0	0	0	0	0	0	0	0	0
NR_031752.1	0	0	0	0	0	0	0	0	0	0	0	0	0	0	0
NR_031667.1	0	0	0	0	0	0	0	0	0	0	0	0	0	0	0
NR_030362.1	0	0	0	0	0	0	0	0	0	0	0	0	0	0	0
NR_031646.1	0	0	0	0	0	0	0	0	0	0	0	0	0	0	0
NR_030348.1	0	0	0	0	0	0	0	0	0	0	0	0	0	0	0
NR_030395.1	0	0	0	0	0	0	0	0	0	0	0	0	0	0	0
NR_031710.1	0	0	0	0	0	0	0	0	0	0	0	0	0	0	0
NR_031624.1	0	0	0	0	0	0	0	0	0	0	0	0	0	0	0
NR_039871.1	0	0	0	0	0	0	0	0	0	0	0	0	0	0	0
NR_039794.1	0	0	0	0	0	0	0	0	0	0	0	0	0	0	0
NR_030280.1	0	0	0	0	0	0	0	0	0	0	0	0	0	0	0
NR_030626.1	0	0	0	0	0	0	0	0	0	0	0	0	0	0	0
NR_030641.1	0	0	0	0	0	0	0	0	0	0	0	0	0	0	0
NR_030322.1	0	0	0	0	0	0	0	0	0	0	0	0	0	0	0
NR_031635.1	0	0	0	0	0	0	0	0	0	0	0	0	0	0	0
NR_031683.1	0	0	0	0	0	0	0	0	0	0	0	0	0	0	0
NR_036140.1	0	0	0	0	0	0	0	0	0	0	0	0	0	0	0
NR_049832.1	0	0	0	0	0	0	0	0	0	0	0	0	0	0	0
NR_030279.1	0	0	0	0	0	0	0	0	0	0	0	0	0	0	0
NR_030340.1	0	0	0	0	0	0	0	0	0	0	0	0	0	0	0
NR_126517.1	0	0	0	0	0	0	0	0	0	0	0	0	0	0	0
NR_002954.1	0	0	0	0	0	0	0	0	0	0	0	0	0	0	0
NR_030342.1	0	0	0	0	0	0	0	0	0	0	0	0	0	0	0
NR_031685.1	0	0	0	0	0	0	0	0	0	0	0	0	0	0	0
NR_033926.1	83.2989	93.2784	78.2988	123.478	100.311	105.513	71.3737	98.92	97.089	116.774	100.748	95.3971	67.2266	71.6782	79.8224
NR_130727.1	0	0.0162331	0.141792	0	0.0138163	0	0	0.0491269	0.0258951	0	0	0	0	0	0
NR_130768.1	0.706979	1.81275	1.61376	0.645251	0.809072	0.965643	0.660596	0.770179	0.60455	0.998859	0.950556	0.930093	0.947911	0.909612	1.01622
NR_130772.1	0.0788212	0.0112409	0.0960441	0.125529	0.0713508	0.0245302	0.0296884	0.0495318	0.0589512	0.0369709	0.109377	0	0	0	0.0973082
NR_130771.1	0	0	0	0	0	0	0	0	0	0	0	0	0	0	0
NR_046619.1	0	0	0	0	0	0	0	0	0	0	0	0	0	0	0
NR_047025.1	0	0.174928	0	0	0	0	0	0	0	0	0	0	0	0.0896483	0
NR_126560.1	0	0.158215	0	0	0	0	0	0	0	0	0	0	0	0	0
NR_039667.1	0	0	0	0	0	0	0	0	0	0	0	0	0	0	0
NR_003138.3	1.0795	2.49065	5.24653	0.36967	3.64004	2.39633	0.0437617	1.61213	0.940357	1.48525	2.84107	0.303272	0.881827	0.514824	5.67087
NR_026808.1	0.163064	0.285712	0.453412	0.0678191	0.294468	0.258365	0.0619794	0.34895	0.100386	0.0881554	0.522598	0.125916	0.264495	0	0.439343
NR_024277.1	0.0189296	0	0	0	0.0536394	0	0	0.0857534	0.0548943	0	0	0.0165125	0	0	0.0471313
NR_046820.1	0	0	0	0	0	0	0	0	0	0	0	0	0	0	0
NR_104158.1	0	0	0	0	0	0	0	0	0	0	0	0	0	0	0
NR_126441.1	0.273144	1.14278	1.02595	0.256848	1.28733	0	0.0699967	0.852618	0.264043	0.461969	0.775069	0.178695	1.55732	0	1.09747
NR_024615.1	0.0637705	0.157339	0.317352	0.0163141	0.176356	0.0663652	0.141324	0.384614	0.0584459	0.183144	0.383914	0.0131861	0	0.0437249	0.355556
NR_027715.1	0.0204477	0.0651532	0.0418546	0.104364	0.0822565	0.0551217	0.0378499	0.234974	0.0560533	0.0503439	0.263984	0.0728377	0.153459	0.033205	0.269054
NR_026812.1	0.0142478	0.159914	0.0895514	0	0.0551413	0.111543	0	0	0	0.115447	0.15913	0	0.394271	0	0.173993
NR_024560.1	0.0218014	0	0	0	0	0.0464785	0	0	0	0	0	0	0	0	0
NR_046218.1	0	0	0	0	0	0	0	0	0	0	0	0	0	0	0
NR_003934.1	0.38593	0.230103	0.673561	0.305169	0.472748	0.340158	0.346965	1.15222	0.680502	0.356076	0.725973	0.188204	0.783936	0.117476	0.934284
NR_077215.1	0.0186703	0.124981	0.0378369	0	0	0.0265355	0.0181223	0.0211332	0	0	0.0833307	0	0	0	0
NR_120396.1	0	0	0	0	0	0	0	0	0	0	0	0	0	0	0
NR_027420.1	0.853095	1.67573	2.60108	0.614205	1.25875	1.42672	0.554341	1.19493	0.624312	1.11241	1.92113	0.612959	1.74878	0.467037	2.23854
NM_001287812.1	0	0	0.261143	0.0691826	0.272892	0.092139	0.124741	0	0.124459	0	0.29032	0.0562049	0	0	0
NM_153478.2	76.8505	24.7568	29.2368	42.323	22.1933	27.3735	52.2265	30.9952	55.4527	33.5356	34.7163	67.5593	14.2036	50.5286	17.4657
NM_001288707.1	0.257133	1.4962	0.836059	0.363964	0.550193	0.464684	0.51589	0.634121	0.311113	0.496531	0.605291	0.171551	0.701505	0.0526767	1.38079
NR_126421.1	0	0	0	0	0	0	0	0	0	0	0	0	0	0	0
NR_126515.1	0	0	0.131379	0	0	0	0.0435211	0.0857498	0	0	0	0	0	0	0
NR_027006.1	0	0	0	0	0	0.0871671	0	0.0231403	0	0	0	0	0	0	0
NR_130112.1	9.44225	15.688	18.3683	14.667	9.8811	15.3189	14.5135	18.166	11.1534	16.9492	12.5627	6.22383	16.6259	18.761	7.2822
NR_130113.1	0	0	0	0	0	0.00419187	0	1.39173	0	0	2.22275	0	0	5.46738e-05	0
NR_130114.1	1.27612	1.12754	0.685913	0	0	0.414489	3.45029	0.00835945	0.33118	0	0.000419213	1.39907	0	1.37894	0.369746
NR_130642.1	0	0	0	0	0	0	0	0	0	0	0	0	0	0	0
NR_130643.1	0.154161	0.331837	0.612399	0.371169	0.153113	0.321407	0.12739	0.71594	0.421572	0.323616	0.653755	0.17734	0.142884	0	0.653781
NR_130649.1	0.251534	1.03238	2.06683	0.331019	0.535431	0.569565	0.190373	1.1275	0.511945	0.710737	1.66021	0.506823	1.37011	0.18781	0.84513
NR_130705.1	0	0	0	0	0.0588568	0	0	0.0465113	0	0	0	0	0	0	0
NR_130714.1	0	0.200768	0	0	0	0	0.0256343	0	0	0	0	0.154695	0	0	0.0361723
NR_130715.1	0	0	0	0	0	0	0	0	0	0.0260229	0	0	0	0	0
NR_130907.1	0	0	0	0	0	0	0	0.268268	0	0	0	0	0	0	0
NR_130911.1	0.26318	0	7.4436	0.323554	3.10479	0.974698	2.05655	13.4082	0.858598	2.66189	0.759772	0.443132	5.26637e-07	0.476051	7.8411
NR_130976.1	0	0	0	0	0	0	0	0	0	0	0	0	0	0	0
NR_130978.1	0	0	0	0	0	0	0	0	0	0	0	0	0	0	0
NR_046097.1	0.0940116	0.384836	0.318767	0.00583261	0.139277	0.292442	0	0.422725	0	0.338349	0.0826084	0.0736102	0.490512	0.040026	0.45681
NR_104674.1	0	0	0	0	0	0	0	0	0	0	0	0	0	0	0
NR_046100.1	0	0	0	0	0.0265544	0	0	0.0106066	0	0.0121659	0	0	0	0	0.011664
NR_033912.1	0	0.0301279	0.0121613	0	0	0.0767599	0.00582476	0	0	0.00779111	0.0669592	0.0157035	0.0342092	0	0.0448181
NR_033913.1	0.0444602	0.220668	0.433432	0.0713056	0.131918	0.180864	0.086035	0.0879311	0.043196	0.0426086	0.116992	0.0770173	0.102237	0.0430778	0.0811146
NR_029411.1	6.70264	21.5323	14.0468	8.64254	15.2334	20.8089	4.2078	8.71465	5.51687	11.7685	16.9032	9.46924	17.2443	6.69437	13.1842
NR_034078.1	2.21233e-07	0	0	0	0	0	0	2.94072e-07	0	0	0	0	0	0	5.71606e-07
NR_034079.1	0.0941185	0	0	0	0	0	0	0.106595	0	0	0	0	0	0	0.11664
NR_034161.1	0	0	0	0	0.698518	0	0	0.0794867	0	0	0.313426	0.0612548	0	0	0.349645
NR_109874.1	0.335643	0.841935	1.11125	0	0.530377	1.18808	0.162896	0.18996	1.13548	0	0.998714	0	0.15945	0	0.736598
NR_029192.1	0.925371	2.08421	1.75032	1.36485	1.66082	2.00308	0.538926	1.52724	1.4311	1.36162	1.85859	1.15697	2.1101	0.952989	1.19026
NR_038253.1	0.982606	8.38411	3.75909	1.2813	3.20197	6.66793	0.708762	1.88417	1.26646	2.55003	4.1261	1.33185	4.17465	0.474274	1.96578
NR_038254.1	5.33559e-07	0.710322	3.80697	1.24528	0.220016	0.822918	0.255688	9.65645e-07	0.284536	0	2.34594	0.00852152	3.16329	1.63847	0.107599
NR_110246.1	0	0	0	0	0	0	0	0	0	0	0	0	0	0	0
NR_038255.1	0.013141	0.000866334	1.01817	0.47032	0.00150773	0.192716	0.0202188	0	1.60251e-07	0	5.26657e-06	0.394411	6.22138e-06	0	1.27934
NR_077227.1	0	0	0	0	0	0	0	0	0	0	0	0	0	0	0
NR_110247.1	0	0	0	0	0	0	0	0	0	0	0	0	0	0	0
NR_027089.2	0	0	0	0	0	0	0	0	0	0	0	0	0	0	0
NR_026658.1	0.0480654	0	0.292226	0	0	0	0	0	0.0929176	0.406663	0	0	0.196934	0	0.05983
NR_040091.1	0.389333	1.0527	0.495359	0.2064	0.896714	0.916445	0.0917701	0.680494	0.177553	0.450833	1.01328	0.227741	0.67398	0.131353	0.666129
NR_046289.1	3.43999	9.7536e-09	0	1.15772	3.5736	1.04097e-08	1.81938	0.424037	0	1.49391e-08	1.38681	2.2789	0	2.68172	0
NR_046288.1	0	0	0	0.997055	0	1.59313	1.01711	0.78016	0.8501	2.18298	0	0.518215	4.3945	0.649338	0.4614
NR_046290.1	2.08875	1.47448	4.84649	0.594977	0	0.195766	1.43232	1.32213	3.94701	0.431663	0	1.66878	0	1.99799	2.72512
NR_036486.1	0	0	0	0	0	0	0	0	0	0	0	0	0	0	0
NR_034086.1	2.56863e-07	1.32991	0	0	0.396372	0	1.46902	0.404196	3.29148	0	3.82945	0.555201	0	0.870309	0.284252
NR_034133.1	1.94627	2.82626	3.44024	2.15758	2.03762	3.04835	1.94511	2.25624	1.73977	2.34938	3.74435	3.43468	2.48508	2.00177	2.73745
NR_040095.1	0	0	0	0	0	0	0	0	0	0	0	0	0	0	0
NR_110255.1	0	0	0.197817	0.010719	0.0672752	0.0433781	0.00944514	0.0369101	0.0197198	0.042454	0.152283	0	0.0629521	0.0188092	0.0708883
NR_046114.1	0	0	0.0196278	0	0	0	0.0188018	0.0438512	0	0	0.0864553	0.00844825	0.027606	0.00831185	0.0120557
NR_105008.1	0	0	0	0	0	0	0	0	0	0	0	0	0	0	0
NR_029393.1	0.036959	0	0.0371368	0.0652187	0	0	0	0.0209515	0	0.0379658	0	0	0	0.134868	0
NR_110216.1	0	0	0	0	0	0	0	0	0	0	0	0	0	0	0
NR_046116.1	0	0	0	0	0	0	0	0	0	0	0	0	0	0	0
NR_037585.1	3.22306e-09	1.85824e-09	0	1.66382e-09	0	1.6788e-09	1.3294e-09	1.26274e-09	1.35089e-09	2.40619e-09	3.34013e-09	7.25728e-10	2.02778e-08	3.62645e-09	1.85056e-08
NR_024102.1	0	0	0	0	0	0	0	0	0	0	0	0	0	0	0
NR_037586.1	0.76882	2.22238	0.424931	0.150858	0.699252	0.198673	0.0678413	0.237338	0.135113	0.458641	1.2478	0.121933	0.416023	0.179947	1.479
NR_024453.2	0.430128	0.6015	0.578328	0.1455	0.242733	0.267472	0.188535	0.245268	0.164591	0.418227	0.877206	0.174031	0.814524	0.339627	0.609469
NR_105056.2	0	0	0	0	0	0	0	0	0	0	0	0	0	0	0
NR_108080.1	0.0334886	0.112088	0	0.252988	0	0.0475963	0.162528	0	0.226585	0	0	0	0.286362	0.0862203	0.166742
NR_110185.1	0	0	0	0	0	0	0	0	0	0	0	0	0	0	0
NR_047662.2	0.2026	0.576355	0.608912	0.229781	0.458677	0.516874	0.155314	0.456522	0.12533	0.265414	0.381298	0.18193	0.662676	0.0881684	0.708781
NR_033841.1	0	0	0.0609605	0	0.0639323	0	0.0145988	0.0340485	0.0145375	0.0195271	0	0	0.0857395	0	0.112329
NR_104132.1	0	0	0	0	0	0	0	0	0	0	0	0	0	0	0
NR_110730.1	2.04054	3.17878	4.71796	0.557163	1.73245	4.02991	0.223401	4.28343	0.459854	1.7736	2.44874	0.815528	6.25634	0.338973	3.6922
NR_110744.1	0.299047	0.800861	0.807215	0.121167	0.435484	0.432974	0.124547	0.115951	0.127921	0.187653	0.381128	0.541666	0.69229	0.0137648	0.807247
NR_110803.1	0.301365	0.630149	0.715844	0.162466	0.475872	0.912511	0	0.0889042	0.0726874	0.292906	1.30425	0.153515	0.969894	0.298766	0.481611
NR_026847.1	0.0856035	0.0573038	0.208179	0	0.145552	0.194665	0.0332364	0.290688	0.0916077	0.0222282	0.18654	0	0.055043	0.0440792	0.106556
NR_102752.1	1.65635	7.1258	5.41755	2.73423	5.46073	5.83193	1.65125	1.85523	2.37024	2.27086	5.60773	3.3993	5.92292	2.01635	4.47712
NR_110809.1	0.143001	0.198428	0.354805	0.0178016	0.161964	0.0846517	0.110321	0.264992	0.0566955	0.0748129	0.2232	0.0867778	0.183324	0.0396379	0.360504
NR_033852.1	0	0.0204148	0.248632	0	0.0694339	0.0694313	0.0596711	0.0415621	0.0474686	0.0158338	0.299833	0.0106279	0.174206	0	0.0177511
NR_002821.2	3.11775	6.92329	3.84326	3.06197	1.402	3.81884	2.09044	2.75497	1.65351	1.71793	3.81126	2.52332	3.18936	3.00278	5.08289
NR_038917.1	0	0	0	0	0	0	0	0	0	0	0	0	0	0	0
NR_110877.1	0	0.175657	0	0	0	0	0	0	0	0	0	0	0	0	0
NR_024264.1	0	0	0	0	0	0	0	0	0	0.0143475	0.0246613	0	0	0	0.0412667
NR_024279.1	2.03483	2.25768	2.89641	0.800561	2.66694	2.72815	1.19699	1.44927	2.38597	1.84413	2.87742	0.893376	2.02291	0.628771	2.99764
NR_024280.1	0	0	0	0	0	0	0	0	0	0	0	0	0	0	0
NR_103772.1	0.544606	3.65028	1.06896	0.124384	1.92846	3.26765	0.800809	0.462876	0.20672	0.630891	1.81999	0.936806	2.70507	0.346368	2.43205
NR_040029.1	0.0465004	0.128624	0.118972	0.0140834	0.0585473	0.0622239	0	0.0490844	0.0380835	0.159927	0.116745	0.103127	0.108087	0	0.0420337
NR_024374.1	1.34658	10.5845	10.6369	1.90319	3.64594	8.22286	0.792704	2.46058	1.52292	2.94691	7.46077	1.09643	6.83601	1.34353	4.21704
NR_026682.1	0.862606	2.92448	4.93288	0.736287	1.35762	2.71982	0.817504	1.56906	0.84129	0.790425	4.89366	0.600653	1.68115	0.655483	2.69745
NR_026943.1	0.522266	3.42386	3.55138	0.261605	2.23226	2.46752	0.163393	1.81745	0.212771	1.58211	2.67556	0.285739	2.76812	0.185211	2.87977
NR_103852.1	0	0	0	0	0	0	0	0	0	0	0	0	0	0	0
NR_024452.1	0.35867	0.709378	0.726875	0.211134	0.600608	0.695136	0.158247	0.258354	0.53578	0.296336	0.145532	0.824822	0.557636	0.335795	1.33938
NR_110930.1	0.412931	0.570038	0.2891	0.0921465	0.0809073	0.162667	0.165482	0.129988	0.223678	0.0371873	0.573412	0	0.411209	0.0485711	0.214505
NR_110931.1	0.0391362	0.0267732	0.277595	0	0.00781148	0.016618	0	0	0	0	0	0	0	0	0
NR_110932.1	0	0.0715171	0	0	0.020661	0.0398169	0	0.0221641	0	0.0254226	0	0	0	0	0
NR_015445.1	0.667224	1.8473	1.73825	0.210224	1.15195	1.47313	0.488494	2.10958	0.482886	1.05707	1.4463	0.551075	1.71835	0.367991	1.33381
NR_024476.1	0.843906	1.4007	0.979772	0.269804	0.636651	1.77307	0.217676	1.73631	0.0916298	1.69344	1.03045	1.0035	0	0.436152	2.00006
NR_110939.1	0	0	0	0	0	0	0	0	0	0	0	0	0	0	0
NR_110943.1	0	0	0	0.515596	0.342185	0.514853	0.117206	0.273357	0.116714	0.156772	0.53894	0	0	0	0.751523
NR_040034.1	0.0473377	0.0597028	0.0721918	0	0.0168761	0.034038	0.0114883	0	0.0115735	0.0308199	0.0265753	0	0.101677	0	0.014856
NR_111907.1	0.32338	0.410248	0.754118	0.132865	0.516871	0.449834	0.175604	0.476867	0.204397	0.2671	0.52416	0.147994	0.406441	0.209861	0.524396
NR_111911.1	0	0	0	0	0	0	0	0	0	0	0	0	0	0	0
NR_024563.1	0.0247812	0.110592	0.0334808	0	0	0.0117402	0	0.0467504	0	0.0107247	0.0368685	0.0144109	0	0	0.0308467
NR_024569.1	1.71477	1.34403	2.37497	0.908996	1.41922	1.65694	1.10577	2.05173	1.36037	1.49013	1.77442	0.982796	1.78739	0.894547	2.15613
NR_037597.1	0.0294006	0.0656035	0.0397219	0.0108529	0.0138861	0.0557149	0.00951255	0	0.0284179	0.044013	0.09977	0	0.0558678	0.0420529	0.125038
NR_024623.1	0.372683	0.426669	0.427919	0.126789	0.0939643	0	0	0.202042	0.133074	0.128847	0.622056	0.258696	0.583306	0.112798	0.205681
NR_003676.3	0	0.0420923	0	0	0	0	0	0	0.0121556	0	0	0.0329095	0	0	0.0156541
NR_026542.1	0	0	0	0	0	0	0.147859	0	0	0	0.169973	0	0	0	0
NR_026547.1	0	0	0	0	0	0	0	0	0	0	0	0.173665	0	0	0
NR_026548.1	0.044203	0.0739748	0	0	0.125264	0	0.257434	0.200136	0.085451	0.0573899	0	0	0	0	0
NR_111954.1	0.333757	0.836475	0.676388	0	0	0	0	0	0	0.55709	0	0.149285	0.931575	0	0.135527
NR_111955.1	0	0	0	0	0	0.184324	0	0	0	0	0.517679	0	0	0	0
NR_111956.1	0	0	0	0	0	0.077079	0	0	0	0	0	0.101202	0	0	0.139194
NR_111957.1	1.74592	2.5911	2.6527	2.05381	2.46857	2.31256	1.48697	2.29676	1.9414	2.16779	1.92296	1.73143	2.18966	1.51783	2.80748
NR_111958.1	0.0526157	0	0.311597	0.549312	0.413868	0	0.317401	0.616889	0.717433	0.171666	0.211061	0.0627564	0	0.0983158	0.43658
NR_046245.1	0	0	0	0	0	0	0	0	0	0	0	0	0	0	0
NR_105013.1	0	0	0	0	0	0	0	0	0	0	0	0	0	0	0
NR_028348.1	0	0	0	0	0	7.72737e-06	0	0	0	0	0	0	0	0	0
NR_028349.1	0	0	0	0	0	0.57739	0	0	0	0	0	0	0	0	0
NR_027145.2	0.0117691	0	0.0315998	0.0171453	0.01997	0.067053	0	0	0	0.018463	0	0	0	0	0
NR_026950.1	0.208541	2.63784	1.21701	1.14535	0.935801	1.32063	0.29833	0.29643	0.594157	0.577437	2.69472	0.40582	2.0446	0.612286	0.980602
NR_027060.1	0	0.0582437	0.0352657	0	0	0	0	0	0	0	0.038834	0	0	0	0
NR_038967.1	6.66373	19.6784	15.0475	9.61903	9.34373	15.8689	3.74485	4.67612	7.08511	7.20875	9.77376	6.52551	6.63621	6.02354	7.76015
NR_027071.1	0	0	0	0	0	0	0	0	0	0	0	0	0	0	0
NR_027090.1	0	0	0	0	0	0	0	0	0	0	0	0	0	0	0
NR_027129.1	1.48697	1.32664	2.42182	0.795352	0.313329	1.99727	1.42554	1.59474	0.734119	1.40219	2.34742	1.28512	2.05562	0.913949	1.82164
NR_109916.1	0	0	0	0	0	0	0	0	0	0	0	0	0	0	0
NR_109917.1	0	0	0	0	0	0	0	0	0	0	0	0	0	0	0
NR_120325.1	0	0	0	0	0	0.183556	0	0	0	0	0	0	0	0	0
NR_120335.1	0.398182	0	0.807797	0.172144	0.343487	0.906162	0	0.182707	0.153949	0.310182	0.356619	0	0.226991	0	0.30137
NR_120339.1	0.265627	0.188816	0.0960104	0.106857	0.162496	0.175908	0.177134	0.17737	0.0957051	0.21036	0.0552413	0	0.209982	0.195552	0.255508
NR_120346.1	0	0.0281244	0	0	0	0.023404	0	0	0	0.0500139	0	0	0	0	0.0212705
NR_120353.1	0	0	0	0	0	0	0	0	0	0	0	0	0	0	0
NR_120362.1	0	0	0	0	0	0	0	0	0	0	0	0	0	0	0
NR_120367.1	0.0130914	0	0.0265515	0	0.0185495	0.0200667	0	0.0740919	0	0.0169969	0	0	0	0	0.0162957
NR_120378.1	0.198332	11.3528	3.10596	1.12232	5.65648	7.311	0	1.15145	0	3.91291	9.01601	3.03221	1.63464	0.832547	3.44655
NR_120379.1	0.447416	3.67482	2.12869	0.426341	1.25757	2.59335	0.187967	0.124308	0.212849	0.442513	1.01174	0.250953	1.43303	0.183456	1.58252
NR_024442.2	0.123428	0.420654	0.0914386	0	0.0675879	0	0	0	0	0	0	0	0.361496	0	0
NR_120395.1	0	0	0	0	0	0	0	0	0	0	0	0	0	0	0
NR_120398.1	0.00787498	0.13179	0.0478779	0	0.0446328	0.100732	0.00764384	0.00891381	0	0.0102243	0.0878706	0.00686924	0.112232	0	0.0490124
NR_120420.1	0	0.107378	0	0	0	0	0	0	0	0	0	0	0	0	0
NR_104616.1	0	0	0	0	0	0	0	0	0	0	0	0	0	0	0
NR_109909.1	3.87075	10.3328	11.9391	3.89055	9.48963	10.19	2.58707	6.4755	6.25074	6.21432	8.5896	5.05105	13.3727	3.64179	10.3646
NR_120423.1	0.673906	0.545738	1.14666	0.218172	0.688499	0.321396	0.312098	0.754639	0.386221	0.560786	0.894271	0.331785	0.632299	0.121797	0.957748
NR_026897.1	0	0	0	0	0	0	0	0	0	0	0.0645468	0	0	0	0
NR_104658.1	0	0	0	0	0	0	0	0	0	0	0	0	0	0	0
NR_104659.1	0	0.177539	0	0	0	0.150778	0	0.240164	0	0	0	0	0	0	0.132053
NR_104673.1	0	0	0	0	0	0	0	0	0	0	0	0	0	0	0
NR_105024.1	0.33755	1.41225	0.684074	0	0.478282	1.67912	0	0.191039	0.163134	0.43825	0.376646	0.14722	1.4432	0.724218	0.42017
NR_108030.1	0	0	0	0	0	0	0	0	0	0	0	0	0	0	0
NR_120434.1	0	0	0	0	0	0	0	0	0	0	0	0	0	0	0
NR_027084.1	0.0169788	0.0142072	0.0516135	0.0366473	0.0962304	0.0361971	0.0164805	0	0	0.044088	0.0378906	0.0222156	0.145186	0.00728564	0.0317019
NR_120444.1	0	0	0	0	0	0	0	0	0	0	0	0	0	0	0
NR_046768.1	0	0	0	0	0	0	0	0	0	0	0	0	0	0	0
NR_120504.1	0.0303261	0.0507514	0.0307292	0	0	0.0431015	0	0	0.0146562	0	0.135354	0.0132265	0	0	0.0566232
NR_120517.1	4.74445	3.62476	1.46316	7.12383	5.40724	2.49203	9.01017	4.43635	5.98157	8.1685	5.06379	5.75795	0	5.48796	2.43932
NR_120523.1	0	0	0	0	0	0	0	0	0	0	0	0	0	0	0
NR_109911.1	0.0989236	0.03312	0.0433335	0	0.0840683	0.0281765	0	0.0224124	0	0.179751	0	0	0.225605	0.0679001	0.0246465
NR_120551.1	0	0	0.0819347	0	0	0	0.0392122	0	0.0195339	0	0	0.0353262	0.0576604	0	0.0251468
NR_120552.1	0	0	0	0	0	0	0	0	0	0	0.0910572	0	0	0	0
NR_120554.1	0	0	0	0	0	0	0	0	0	0	0	0	0	0	0
NR_120555.1	0	0	0	0	0	0.917781	0	0	0	0	0	0	0	0	0
NR_120568.1	0	0	0	0	0	0	0	0	0	0	0	0	0	0	0
NR_120569.1	0	0	0	0	0	0	0	0	0	0	0	0	0	0	0
NR_120624.1	0.0415446	0	0	0	0	0	0	0.047025	0	0	0	0	0	0	0
NR_120625.1	0	0	0	0	0	0	0	0	0	0	0	0	0	0	0
NR_120634.1	0.289537	0.451611	0.627182	0.105782	0.439196	0.323554	0.21974	0.352348	0.293938	0.246335	1.057	0.206176	0.518355	0.0919851	0.591977
NR_120635.1	0	0	0	0	0	0	0	0	0	0	0	0	0	0	0
NR_110056.1	1.94049	0	1.81503	1.9331	0.634504	1.06075	0.579549	0.675837	0	0.968995	0	1.43225	0.850932	1.53723	0.929019
NR_120660.1	0.115091	0.262012	0.204686	0.0390024	0.298053	0.181048	0.0453608	0.10906	0.0933706	0.0886668	0.301205	0.125282	0.24787	0.0225022	0.262715
NR_120662.1	0	0.620419	0.56348	0.0500113	0.787933	0.461038	0	0.104908	0.0447918	0.120331	0.723912	0.121267	0.396261	0.0795396	0.17305
NR_120669.1	0	0	0	0	0	0	0	0	0	0	0	0	0	0	0
NR_120670.1	0	0	0	0	0	0	0	0	0	0	0	0	0	0	0
NR_121185.1	0	0	0	0	0	0	0	0	0	0	0	0	0	0	0
NR_121186.1	0.0601304	1.45024	4.13102	0.092708	0.170723	1.28886	0.130255	0.513016	0	0.558063	0.950509	0.126393	0.55944	0.150873	0.891185
NR_121187.1	0.103013	0	0	0.336265	0	0	0.201626	0	0	0	0	0	0	0	0
NR_121565.1	0.168801	0.522885	0.428775	0.0415381	0.0331929	0.269244	0.0599331	0.288802	0.161006	0.0732989	0.436436	0.0262939	0.275518	0.0378313	0.254834
NR_036573.1	0.681014	5.06961	5.94001	1.07969	2.81083	4.08351	0.304624	2.36735	0.743683	2.12848	4.55988	0.745889	4.01001	0.647406	3.17917
NR_121602.1	0.0196371	0.0876351	0	0.0211925	0.0556484	0.0279096	0	0.0222276	0	0.00849846	0	0.0228389	0.0559725	0.0168527	0.0651828
NR_121606.1	0	0	0	0	0	0	0	0	0	0	0	0	0	0	0
NR_110214.1	0	0	0	0	0	0	0	0	0	0	0	0	0	0	0
NR_028335.1	0.536181	0.538387	1.30394	0.578651	0.151945	1.67652	0	1.21382	0.103652	0.278455	0.478625	1.02895	0.611319	0	0.934385
NR_121624.1	0	0	0	0	0	0	0	0	0	0	0	0	0	0	0
NR_121626.1	0	0	0	0	0	0.281453	0	0	0	0	0	0	0	0	0
NR_121651.1	0	0	0	0	0	0	0	0	0	0	0	0	0	0	0
NR_121657.1	0.588206	0.492188	0.298012	0.0793496	0.20836	0.940498	0.0713677	0	0.568545	0.190921	0.164083	0.57722	0	0.1893	0.366089
NR_121660.1	0	0	0	0	0	0	0	0	0	0	0	0	0	0	0
NR_121667.1	0.3454	0	0	0	0	0.122727	0	0	0.0834637	0.224221	0	0	0	0	0
NR_121668.1	0	0	0	0	0	0	0	0	0	0	0	0	0	0	0
NR_121677.1	0.206115	0.511385	1.48462	0.260887	0.155253	0.450648	0.0226411	0.0781815	0.168091	0.077662	0.106317	0.103138	0.487407	0.0611628	0.680451
NR_122043.1	0	0	0	0	0	0	0.0332939	0	0	0	0	0	0	0	0
NR_026874.2	0.934462	2.05928	2.79237	0.185916	0.906635	1.53901	0.191102	4.06706	0	0.642767	1.70255	0.66548	0	0	3.30845
NR_122045.1	0.000760164	0	0.000633754	0	0	0	0	0	0.851083	0.298688	0	0	2.50977	0.0889013	0
NR_122122.1	0	0	0	0	0	0	0	0	0	0	0	0	0	0	0
NR_122123.1	0.113793	0.0615921	0.224062	0.198835	0.209056	0.156845	0.637035	0.292886	0.0397889	0	0.577045	0.0320988	0.209839	0	0.458927
NR_110225.1	0	0	0	0	0	0	0	0	0	0	0	0	0	0	0
NR_110272.1	0.274772	0.128154	0.930616	0.0750156	0.059509	0	0.100211	0.271152	0	0.0890058	0	0.0604379	0.0989923	0	0.217368
NR_110479.1	0.859583	0.88684	1.66334	0.197622	0.228958	0.895141	0.0995043	0.749645	0.00380784	0.478201	1.91213	0.260972	1.00173	1.23071e-07	0.726089
NR_027033.2	0	0.329212	0.797331	0.0666418	0.557467	0.279589	0.190944	0.445336	0.544659	0	0	0	0	0.262281	0.489734
NR_110497.1	0	0	0	0	0	0	0	0	0	0	0	0	0	0	0
NR_110504.1	0	0	0	0	0	0	0	0	0	0	0	0	0	0	0
NR_110514.1	7.10774	5.4259	8.52568	3.84463	4.43763	4.00165	5.6351	5.0155	6.54701	2.94406	7.20383	4.68212	3.49135	2.34449	4.07906
NR_109770.1	0.233727	0.280549	0.296212	0.383416	0.497759	0.416428	0.109882	0.356415	0.278312	0.0942781	0.507883	0.134529	0.438879	0.0314311	0.594247
NR_110278.1	0.0750111	0	0	0	0	0	0	0.0424531	0	0	0	0.0981469	0	0	0.0477291
NR_125344.1	0.0305223	0.184626	0.357891	0.021929	0.0306445	0.188319	0.0098554	0.242274	0.078503	0.146415	0.113729	0.0550707	0.150583	0.00872318	0.179969
NR_038846.1	0	0	0	0	0	0	0	0	0	0	0	0	0	0	0
NR_033389.1	0	0.256463	0.785129	0.0432544	0.313523	0.701957	0.0640373	0.388478	0.0570631	0.276829	0.130351	0.0518604	0.760495	0	2.12504e-05
NR_125362.1	0.158475	0.285586	0.65311	0.0238652	0.0918877	0.103686	0.203492	0.24154	0.0514406	0.237615	0.385521	0.156581	0.239069	0.015763	0.208445
NR_125374.1	0.628566	1.0672	2.85748	0.241648	0.528197	0.814075	0.300047	1.06999	0.509104	0.555026	1.74859	0.147905	1.57528	0.216653	1.24673
NR_125387.1	0.138806	0	0	0	0	0	0	0	0.067083	0	0	0	0	0	0
NR_125395.1	0.298837	0.100022	0	0.233995	0.338743	0.169891	0	0.122711	0	0	0.400138	0	0	0.0930382	0.297585
NR_110283.1	0.098359	0	0	0.2123	0	0.139794	0.286416	0.222668	0.0950713	0	0	0	0	0	0
NR_125426.1	0.100564	0	0.203266	0.310966	0	0	0	0	0	0	1.05299	0	0	0	0
NR_125429.1	0.213262	0.449663	0.5445	0.0644935	0.51095	0.300938	0.319761	0.285845	0.0291714	0.36888	0.471096	0.191531	0.273424	0.397472	0.419268
NR_125430.1	0.195424	0.499088	0	0	0.0428497	2.60491	0.631184	0	0.377783	0	0	1.22548	1.67107	0.782052	0
NR_125432.1	0	0	0	0	0	0	0	0	0	0	0	0	0	0	0
NR_125431.1	0.16697	0	0	0.154121	0	0	0.0798679	0	0	0	0	0	0	0	0.0898427
NR_125821.1	0.118652	0.113879	0.337888	0.0966623	0.240624	0.406882	0.10571	0.0599457	0.112761	0.197164	0.386014	0.0144996	0.233909	0.029536	0.444611
NR_125826.1	0	0	0	0	0	0	0	0	0	0	0	0	0	0	0
NR_125838.1	0.118906	0.131009	0.0900159	0	0.105063	0.0273223	0.06111	0.185856	0.0262111	0.132019	0.0132859	0.0094181	0.0814239	0.00771349	0.201825
NR_125839.1	0.146327	0	0	0	0.414668	0	0	0	0	0	0	0	0	0	0
NR_125842.1	0.0858212	0.139143	0.157555	0.0223746	0.0442172	0.0148543	0.0450782	0.246413	0.0403117	0.0157606	0.256573	0	0.0592128	0.0215987	0.0389133
NR_125843.1	0	0.219984	0.757597	0	0.258255	0.860013	0.0589903	0.234765	0	0.351583	1.12739	0.229353	0	0	0.364158
NR_125847.1	0	0	0	0	0	0	0	0.136678	0	0	0	0	0	0	0
NR_125851.1	0	0	0	0	0	0	0	0	0	0	0	0	0	0	0
NR_125852.1	0.159632	0.0557938	0.140933	0.0719167	0.272952	0.290068	0.0760546	0.228411	0.17674	0.172765	0.0758265	0	0.54483	0.0282621	0.502392
NR_125853.1	0	0	0	0	0	0	0	0	0	0	0	0	0	0	0
NR_125858.1	0.449095	0.214734	0.130018	0.0692381	0.272713	0	0.0622733	0.290479	0	0.249888	0	0.223851	0.365735	0	0.399298
NR_125859.1	0	0	0	0	0	0	0	0	0	0	0	0	0	0	0
NR_125864.1	3.00087	5.96336	4.29631	1.53384	3.56398	3.98648	3.52049	0.977642	3.93531	1.93747	4.89883	1.35926	5.06358	1.27323	3.40376
NR_125867.1	2.62871	0.21996	0	0.851077	0.558701	1.12083	1.1482	0.148774	0.835385	0.341292	0	1.14649	0	1.12798	0
NR_125874.1	0	0	0	0	0.0833441	0	0.114188	0	0	0.152737	0	0	0	0	0
NR_125878.1	0	0	0	0	0	0	0	0	0	0	0	0	0	0	0
NR_125879.1	0.282485	0.436381	1.16836	0.26665	0.474891	0.217533	0.189827	0.688691	0.37806	0.677222	0.890645	0.30805	1.28357	0.320761	0.757351
NR_125881.1	0	0.194893	0	0	0	0	0	0	0	0.835405	0	0	0	0	8.64719e-06
NR_125882.1	0.300045	1.22743	0.844536	0.215874	0.708565	0.781814	0.161799	1.01888	0.370575	0.367914	0.743991	0.378047	0.52264	0.400555	0.767718
NR_125893.1	0.0802822	0	0	0	0	0	0	0	0.232796	0	0.358322	0	0	0	0
NR_125892.1	0.0569323	0.0476387	0.144223	0.0460813	0.0806685	0.020229	0.0552612	0.128885	0.0137573	0.147833	0.0952893	0.0496613	0.0405691	0	0.0177168
NR_125900.1	0.34719	0.175835	0.554464	0.022925	0.659025	0.148579	0.105713	0.428792	0.183079	0.137361	0.62101	0.109022	0.178185	0.0357538	0.460669
NR_125905.1	0	0	1.36644	0.155938	0.206638	0	0	0.24576	0	2.25969e-10	0	0	0	0.0486858	0
NR_027107.2	0.789033	1.62824	1.29459	0.564342	1.1853	1.53458	0.403091	0.723073	0.550491	0.98591	1.3769	1.09191	1.65717	0.443801	1.56555
NR_033998.1	0	0	0	0	0	0	0	0	0	0	0	0	0	0	0.0564503
NR_125923.1	0	0.749413	0	0	0	0	0	0	0.144279	0	1.99868	0	0.850932	0	0
NR_046668.1	0	0	0	0	0	0.29318	0	0	0	0	0	0	0	0	0
NR_125943.1	0	0	0	0	0	0	0	0	0	0	0	0	0	0	0
NR_125947.1	2.55932	7.4726	6.56611	2.87957	5.05374	6.03666	2.40492	3.26675	2.44745	4.34796	5.34692	4.63117	6.59648	2.07959	4.67694
NR_125953.1	0.157166	0.131511	0.796276	0.254423	0.445384	0.111688	0.0762766	0.355798	0	0	0	0.205641	0	0	0.978173
NR_034091.1	0	0.125737	0.715332	0.027516	0.10565	0.178772	0	0.0851634	0.0244391	0	0.279877	0.0653909	0.143401	0.0859912	0.276867
NR_125958.1	0.763828	0.710158	0.515987	0.0915921	0.841776	0.361868	0.0823787	0.0960654	0.246099	0.220377	0.378798	0.148062	1.20954	0	0.316928
NR_046323.1	0	0	0	0	0	0	0	0	0	0	0	0	0	0	0
NR_034099.1	0	0	0.158626	0	0.110906	0.0556231	0.0379876	0.132897	0	0.101623	0.0873381	0.102414	0	0	0
NR_105040.1	0	0	0	0	0	0	0	0	0	0	0	0	0	0	0
NR_125965.1	0	0	0	0	0	0	0	0	0	0	0	0.118316	0	0	0
NR_125975.1	0.256917	0.752238	0.585313	0.297224	0.107673	0.27421	0.215701	0.238727	0.251007	0.311367	0.200903	0.285082	0.38896	0.279651	0.150472
NR_125976.1	0.658608	0.142469	0.880252	0.425174	0	0.646504	0.552078	0.515352	0.6415	0.188777	0.94056	0.58341	0.307847	0.62109	0.733499
NR_125979.1	0	0	0.495395	0	0.18021	0.175406	0	0	0	0	0	0.103702	0	0.205177	0.303943
NR_125982.1	0	0	0	0	0	0	0	0	0	0	0	0	0	0	0
NR_125984.1	0	0	0	0	0	0	0	0	0	0	0	0	0	0	0
NR_125987.1	0	0	0	0	0	0	1.91911	0	0	0	0	0	0	0	0
NR_125993.1	0	0	0	0	0	0	0	0	0	0	0	0	0	0	0
NR_126003.1	0.218415	0	0.885272	0.235715	0	0	0	0	0	0	0	0.19052	0	0.187445	0
NR_126004.1	0.0249401	0.128838	0.279602	0.0654896	0.0172641	0.128666	0.0264719	0.0437484	0.0354288	0.0473988	0.218956	0.031813	0.0723189	0.0208448	0.260327
NR_126007.1	0	0	0	0	0	0	0	0	0	0	0	0	0	0	0
NR_126022.1	0	1.55291	0	0	0	0	0	0	0	0	0	0	0.0843863	0.166233	0
NR_126023.1	0.0899151	0	0	0	0	0	0.24633	0	0.146551	0	0	0	0	0	0
NR_126025.1	0	0.057126	0	0	0	0	0	0	0	0	0	0	0	0	0
NR_126047.1	0.51272	0.483981	0.975853	0.16476	0.640449	0.83606	0.241742	0.755493	0.702323	0.495503	0.404444	0.552663	1.01016	0.229518	1.07606
NR_126050.1	0	0	1.09264	0	0	0	0	0	0	0	0	0	0	0	0
NR_126054.1	0	0	0	0	0	0	0	0	0	0	0	0	0	0	0
NR_126062.1	0	0	0	0	0	0	0	0	0	0	0	0	0	0	0
NR_038862.1	0.120616	0.152646	0.248706	0	0.34797	0.171753	0.103731	0.0892396	0.054436	0.0478414	0.150045	0.0572396	0.315503	0	0.378095
NR_026578.1	0	1.58486	0	0.0581964	0	1.47975	0	0	0	0.385785	0.22216	0	0.0483381	0.0643311	0.824136
NR_126345.1	0.805386	1.89257	2.3963	0.138071	0.439275	0.948736	0.560182	1.09289	0.733312	0.145543	2.14599	0.3364	0.488547	0	0.795977
NR_126346.1	0	0	0	0	0	0	0	0	0	0	0	0	0	0	0
NR_126348.1	0	0.548283	0	0	0	0.310426	0	0	0.211114	0	0	0	0	0	0
NR_126349.1	0	0	0	0	0	0	0	0	0	0	0	0	0	0	0
NR_126352.1	0	0	0	0	0	0	0	0	0	0	0	0	0	0	0
NR_126353.1	0	0	0	0	0	0	0	0	0	0	0	0	0	0	0
NR_126358.1	0.503465	0.84256	1.53047	0.815015	2.14011	0.357779	0.488687	1.70964	0	0.326831	0	0	0.717523	0.432076	0.940041
NR_126361.1	0	0	0	0	0	0	0	0	0	0	0	0	0	0	1.17381
NR_126363.1	0	0	0	0	0	0	0	0	0	0	0	0	0	0	0
NR_126369.1	0	0	0	0	0	0	0	0	0	0	0	0	0	0	0
NR_126370.1	0	0.20627	0	0	0	0	0	0	0	0	0	0	0	0	0
NR_126374.1	0	0	0	0	0	0	0	0	0	0	0	0	0	0	0
NR_126375.1	0	0	0	0	0	0	0	0	0	0	0	0	0	0	0
NR_036551.1	0.414097	0.353839	0.433904	0.207892	0.396324	0.365481	0.174276	0.479126	0.220292	0.446709	0.75884	0.218988	0.624749	0.140442	0.64918
NR_126380.1	0	0	0	0	0	0	0	0	0	0	0	0	0	0	0
NR_126382.1	0.212174	0	0.644984	0	0.300634	0.150778	0	0.120082	0	0	0	0	0.302385	0	0.132053
NR_126383.1	0	0	0	0	0	0	0	0	0	0	0	0	0	0	0
NR_126385.1	0	0	1.30866	0	0	0.917779	0	0	0	0	0	0	0.920299	0	0
NR_126397.1	0	0	0	0	0	0	0	0	0	0	0	0	0	0	0
NR_126401.1	0	0	0	0	0	0	0	0	0	0	0	0	0	0	0
NR_126410.1	0	0	0	0	0	0	0	0	0	0	0	0	0	0	0
NR_027093.1	0	0	0	0	0	0	0	0	0	0	0	0	0	0	0
NR_126411.1	0.246541	0.28202	0.48079	0.171429	0.417288	0.432664	0.146833	0.33815	0.414157	0.286138	0.673031	0.108057	0.420835	0.0339466	0.393561
NR_126413.1	0	0	0	0	0	0	0	0	0	0	0	0	0	0	0
NR_126412.1	0	0	0	0	0	0	0	0	0	0	0	0	0	0	0
NR_126422.1	0	0	0.489419	0	0	0	0	0	0	0	0	0	0	0	0
NR_126424.1	0.602351	1.66697	1.94715	0.505379	0.924327	0	0	1.55747	1.49773	0.278403	0.917473	0.33219	1.14327	0	0
NR_105044.1	0	0	0.149063	0.236876	0.518335	0.125013	0.098115	0.0829894	0	0.18998	0	0.0649685	0	0.0627893	0
NR_109774.1	0	0	0	0	0	0	0	0	0	0	0.342582	0	0	0	0
NR_024236.1	0.0646426	0.279943	0.293345	0.0308311	0.237952	0.122794	0.089134	0.134524	0.0857021	0.123145	0.270052	0.0469534	0.20337	0.0450725	0.199565
NR_036475.2	0.125878	0.31587	0.23772	0.731073	0.730378	0.812548	0.528477	0.272082	0.123226	0.724179	0.656758	1.04494	1.29786	0.431309	0.222269
NR_126435.1	6.60457	27.5974	36.4494	6.02731	17.5016	22.1081	2.92157	11.8875	3.72417	10.9139	31.7354	9.02259	38.6035	4.48788	36.1396
NR_126447.1	1.68935	3.27321	5.15555	0.505367	3.36516	1.77002	0.657777	0.956765	0.110551	1.98507	3.4603	0.150664	1.84678	1.18705	4.9252
NR_126518.1	0	0	0	0	0	0	0	0	0	0	0	0	0	0	0
NR_126519.1	0	0	0	0	0	0	0	0	0	0	0	0	0	0	0
NR_003142.2	21.6697	13.8659	11.6247	19.2592	14.449	18.1167	31.5505	15.1498	32.6501	11.5847	15.6456	31.133	19.9831	11.4864	23.0069
NR_126561.1	0.796339	0.900582	0.838013	1.0554	0.944783	1.03196	0.940252	0.481518	1.03531	0.776464	1.25024	0.981413	1.38003	0.795617	1.01868
NR_038976.1	0	0	0	0	0	0	0	0	0	0	0.0390859	0	0	0	0.0436025
NR_029410.1	0.781583	2.93054	1.26109	1.85475	1.25202	3.20283	1.12649	0.386486	0.899888	1.12814	2.20051	1.07626	1.5495	2.26281	1.72937
NR_109985.1	0.0250491	0.017716	0.090046	0.0471115	0.123849	0.185721	0.011286	0.112403	0.0217326	0.0137441	0.383563	0	0	0.0292791	0.0840547
NR_109777.1	0.0538979	0.176908	0	0	0.525691	0.0765109	0	0	0	0	0.355534	0	0	0.0907205	0.202533
NR_103732.1	2.16668e-07	5.51172e-09	1.74911	0.162798	0	0	0.0691141	8.81242e-06	0	0	0	0	0	0	0
NR_103733.1	0	1.62516	0	0	0	1.5048	0	3.09162	0	1.32986	0	0	0.670635	0	0
NR_038378.4	0.104427	0.352191	0.760537	0.153391	0.516806	0.263509	0.0870452	0.294165	0.118768	0.0760491	0.66519	0.141264	0.515357	0.106962	0.657291
NR_036494.1	0.172032	0.173827	0.168069	0.0124977	0.0315675	0.0868712	0.0407457	0.168185	0.0573343	0.0783941	0.066278	0	0.158834	0.00639959	0.147851
NR_027128.1	0.554452	2.13405	1.32764	0.768037	1.16	2.29357	0.473452	0.848888	0.546504	0.782239	0.908404	0.924466	3.4176	0.359697	1.898
NR_037871.1	3.43759	3.08497	0.654437	2.73571	1.49985	2.70576	2.77842	2.7885	5.31868	2.09169	0.285036	3.52476	0	4.67493	1.38065
NR_029405.1	0.539426	2.92083	4.53668	0.599902	1.82983	2.62408	0.539956	1.28753	0.411365	1.41895	3.53562	1.16536	4.49406	0.938592	3.53162
NR_104662.1	2.6832	1.59196	6.19292	1.21956	0	0.892256	1.16099	2.21016	5.22687	1.71332	0	0	1.22196	1.06406	2.46305
NR_104668.1	0	0.0364718	0.0883324	0	0.154398	0	0	0.0246683	0.0842598	0.0565899	0	0	0.248475	0	0.0271276
NR_037808.1	0.0412561	0.0696431	0	0	0.0584566	0	0	0	0	0	0	0	0.470376	0	0.0545067
NR_104157.1	0	0	0	0	0	0	0	0	0	0	0	0	0	0	0
NR_103825.1	0	2.99609	6.19315	0.175462	0.689773	1.5185	0.12027	1.65769	0.00141859	0.648757	1.27673	0	0.79116	0.154928	0.976606
NR_038839.1	0	0	0	0	0	0	0	0	0	0	0	0	0	0	0
NR_029406.1	0.175659	0.298078	1.12444	0.264948	0.16985	0.370399	0.0578618	0.42343	0.441753	0.439365	0.517733	0.141563	0.271673	0	0.394374
NR_038891.1	0	0	0	0	0.0753604	0	0	0	0	0	0	0	0	0	0
NR_033738.1	0.311438	1.40842	1.50806	0.159765	0.589944	0.867004	0.192816	0.569844	0.125471	0.519212	1.30918	0.115629	1.46665	0.0845768	1.0704
NR_109945.1	0	0	0	0	0	0	0	0	0	0	0	0	0	0	0
NR_002193.2	0.120146	0.088357	0.518059	0.018392	0.217803	0.0974984	0.0676673	0	0	0.0221392	0.334808	0	0.100566	0	0.110302
NR_015382.2	1.58247	1.64471	1.93212	0.902433	1.96988	1.87343	1.21297	2.05582	1.62421	1.36476	1.62001	0.805704	2.23213	0.703666	2.39256
NR_003570.2	0.0281965	0.031307	0.0952819	0	0.0123743	0.026425	0.0615023	0.11908	0.0856672	0.0622031	0.218109	0.01518	0.127141	0	0.0943051
NR_130774.1	0	0	0	0	0	0	0	0	0	0	0	0	0	0	0
NR_130779.1	0	0	0	0.152896	0	0	0	0	0	0	0	0	0	0	0
NR_046845.1	0	0	0	0	0	1.37667	0	1.46186	0	0	1.44107	0	0	0.554182	0
NR_047022.1	0	0	0	0	0	0	0	0	0	0	0	0	0	0	0
NR_130921.1	0	0	0	0	0	0	0	0	0	0	0	0	0	0	0
NR_130922.1	6.41764e-09	2.05209e-09	4.15364e-09	3.27078e-09	1.83247e-09	5.09993e-09	2.45075e-09	4.48841e-09	0	3.05074e-09	9.61501e-10	7.64242e-09	1.2934e-07	4.44297e-09	1.68796e-08
NR_130923.1	0.177234	0.237284	0.17959	0.0382545	0.175788	0.0755691	0.0172032	0.100307	0	0.0690322	0.0395523	0.154599	0.404142	0.0304206	0.176491
NR_130924.1	0.073308	0.147219	0	0	0.103872	0	0.0142313	0.0165957	0	0.0199791	0.134856	0	0.250743	0	0.127752
NR_130925.1	0	0	0	0	0	0	0	0	0	0	0	0	0	0	0
NR_130930.1	0.0384274	0.160773	0.215439	0.0622068	0.163346	0.0819235	0.0932489	0.0217483	0	0	0	0	0	0	0.158525
NR_130933.1	0.569538	0.931407	1.47158	0.153925	0.990572	0.794347	0.473822	0.727039	0.563659	1.00275	1.51288	0.353096	0.715401	0.0687853	1.37112
NR_103745.2	0	0	0.102205	0	0	0	0.0489517	0	0	0	0.112546	0	0	0.0865618	0
NR_130967.1	0.402105	1.27971	0	0.870702	0.747054	0.118813	0	0.697966	0.593942	0.524721	0	0.91426	0.8724	0.00286766	1.23906
NR_038975.1	1.12092	1.09427	2.65025	0.403236	1.05884	0	1.08802	2.00891	0.270863	1.09149	1.25075	0.244441	1.33125	0.32066	1.97665
NR_040013.1	0.0782725	0.196486	0	0	0	0	0	0.0501497	0	0.101623	0	0	0.111552	0.119772	0.106523
NR_040084.1	5.98617	10.4221	6.05304	9.09044	6.36292	11.6881	4.89834	3.74335	5.8778	8.51007	7.18515	10.6936	6.63351	8.20261	5.86024
NR_026933.2	0	0	0	0	0	0	0	0	0	0	0	0	0	0	0
NR_104345.1	0.437389	0.280834	0.158828	0.251129	0.469177	0.303698	0.424551	0.232998	0.393582	0.133626	0.204736	0.215647	0.0351504	0.30435	0.210318
NR_126480.1	0.461044	0.440896	1.93543	0.0710804	0.419955	0.608462	0.287686	0.151054	0.128357	0.342049	0.955394	0.14363	1.78347	0.0565243	1.5987
NR_110543.1	0.462923	0.837207	1.84225	0.666905	0.841204	0.982817	0.223045	0.656897	0.4514	0.52768	0.55533	0.384928	0.428542	0.512867	0.572261
NR_120366.1	0	0.143259	0	0.092384	0.36388	0	0	0.048448	0.0413711	0	0.477591	0	0	0	0
NR_108022.1	0	0	0	0	0	0	0	0	0	0	0	0	0	0	0
NR_102743.1	0.0463407	0.174425	0	0.0743788	0	0	0.0334484	0.0390057	0	0.106341	0.206832	0	0	0.118294	0.343155
NR_126481.1	0	0.211884	0	0.0888012	0.116589	0	0	0	0	0	0.0930099	0	0	0	0.313746
NR_126330.1	0.353376	0.626171	0.547642	0.2692	0.206173	0.472699	0.0807069	0.211761	0.321473	0.323857	0.185555	0.217585	0.355498	0.303269	0.258747
NR_130773.1	0	0	0	0.0620063	0	0	0	0	0	0	0	0	0	0	0
NR_110418.1	0	0.194383	0.113592	0.158466	0.0794656	0.161174	0	0.0633537	0.0540818	0	0	0.0981508	0.164248	0	0.426375
NR_040583.2	0.236897	1.40389	0.48647	0	1.79659	1.37405	0.137945	0.64715	0.258348	0.644134	0.296622	0.206824	0.687245	0	0.55562
NR_110597.1	0	0.0852676	0.103256	0.0549867	0.144387	0	0	0.0576722	0.0492479	0	0.79593	0.0888878	0.580911	0	0.190266
NR_120506.1	0.0555223	0	0.0562603	0	0	0	0	0	0	0	0	0	0	0	0
NR_121673.1	0.159825	0.173964	0.105315	0.282885	0.0966072	0.0910783	0.100015	0.221709	0.228721	0.0857618	0.0911874	0.23877	0.198569	0.499007	0.425612
NR_126355.1	0.469017	1.13376	0.844891	0.224963	0.22152	1.03693	0.758751	0.117975	0.151113	0.338298	0	0.18183	0.594159	0.178894	0.38921
NR_104133.1	0.299519	2.399	3.74122	0.350007	0.887535	0.808296	0.891955	0.943172	0.59538	0.447874	3.53435	0.0709451	1.68629	0.109564	1.5991
NR_110547.1	0	0	0	0	0	0.0931963	0	0	0.0633809	0	0	0	0	0	0
NR_110822.1	0.0277871	0	0	0	0	0	0	0	0	0	0	0	0	0	0
NR_121669.1	0	0	0	0	0	0	0	0.112828	0	0	0	0	0	0.0855452	0
NR_125739.1	0.413112	0.924185	1.64375	0.168411	0.376495	0.775614	0.370059	0.786824	0.390575	0.351139	1.69877	0.166938	1.02467	0.117544	1.14264
NR_126482.1	0	0	0.0340682	0	0.071458	0.0238924	0	0.0951412	0.0162487	0.0654771	0.0375153	0.0146637	0.0479161	0.014427	0.209253
NR_047003.1	0	0	0	0	0	0	0	0	0	0	0	0	0	0	0
NR_103765.1	0.470731	0.416293	0.704611	0.0894392	0.296041	0.293659	0.24232	0.191923	0.403614	0.108077	1.00716	0.144802	1.09075	0.171956	0.482487
NR_120309.1	1.90413	4.77991	8.74679	0.753482	3.7772	5.23214	2.58754	4.38247	2.45398	2.88421	6.65729	1.05193	7.7793	1.19836	3.7133
NR_120590.1	0.0880131	0	0	0	0	0	0	0	0	0	0.0982068	0	0.250867	0	0.328666
NR_125774.1	0.162193	0	0	0	0.0960931	0	0	0.434942	0	0	0.170699	0.059157	0	0	0.371858
NR_125425.1	0	0	0	0	0	0	0	0	0	0	0	0	0	0	0
NR_120534.1	0.228051	0.221914	0.816914	0.0354616	0.398567	0.672874	0	0.0454163	0.139348	0.255969	0.195978	0	0.749272	0.0328302	0.490818
NR_120609.1	0.101419	0.23622	0.323273	0	0.188075	0.275428	0.0372307	0.131846	0.0444445	0.0597182	0.263863	0.0305305	0.1842	0.0104245	0.204883
NR_110259.1	0.28023	0.117243	0.709888	0.151213	0	0.199141	0.0680013	0.277547	0.406295	0	0	0.152776	0	0.240495	0.17441
NR_103707.1	0.0395356	0	0.10683	0.0568895	0	0	0	0.029834	0.012738	0	0.0294098	0	0.0375633	0	0.0328083
NR_121672.1	0	0	0	0	0	0	0	0	0	0	0	0	0	0	0
NR_126365.1	0	0.265834	0	0	0	0	0.0616739	0	0	0	0	0	0	0	0
NR_125803.1	0	0	0	0	0	0	0	0	0	0	0	0	0	0	0
NR_120337.1	0	0	0.17525	0	0	0	0	0	0	0	0	0	0	0	0
NR_126356.1	0	0	0	0	0	0	0	0	0	0	0	0	0	0	0
NR_120602.1	0	0	0.445915	0	0	0.312725	0	0	0	0	1.4731	0	0	0	0
NR_126406.1	0	0	0	0	0	0	0.0746957	0	0	0	0	0	0	0	0
NR_120607.1	0	0	0	0	0	0	0	0	0	0	0	0	0	0	0
NR_126420.1	0.130569	0	0	0	0	0	0.253473	0	0.0631023	0	0	0	0	0	0
NR_125783.1	0	0	0	0	0	0	0	0	0	0	0	0	0	0	0
NR_125776.1	0	0	0	0.0452147	0	0	0	0.237115	0	0	0	0	0	0	0.104302
NR_046669.1	0	0	0	0	0	0	0	0	0	0	0	0	0	0	0
NR_126448.1	0.186469	0	0.266007	0	0.0579824	0	0.0907131	0.172459	0.163568	0	0	0	0	0.0643017	0.271711
NR_126557.1	0	0	0	0	0	0	0	0	0	0	0	0	0	0	0
NR_125777.1	0.102881	0.112602	0.341501	0.145134	0.0955601	0.334429	0.261438	0.26651	0.455257	0.218211	0.600407	0.176188	0.479106	0.49024	0.50314
NR_125740.1	0	0	0	0	0	0	0	0	0	0	0	0	0	0	0
NR_126403.1	0	0.432444	0	0	0.367095	0.0950103	0.073771	0.494575	0.603119	0.166853	0	0.0559131	0.374566	0	0.250021
NR_046876.1	0	0	0	0	0	0	0	0	0	0	0	0	0	0	0
NR_126407.1	0.353811	0.199643	0	0	0	0	0	0.331349	0.230615	0	0	0	0	0	0
NR_117096.1	0.0225717	0.0755487	0	0.0487192	0.0959471	0.0320805	0	0	0	0.175833	0.453348	0.0787562	0.12917	0.116227	0.0280965
NR_046556.1	0	0	0	0	0	0	0	0	0	0	0	0	0	0	0
NR_126470.1	0	0	0	0	0	0	0	0	0	0.154264	0	0	0	0	0
NR_122109.1	0	0.0918738	0	0	0.084236	0	0	0.0499809	0	0	0	0	0	0	0
NR_046606.1	0	0	0	0	0	0	0	0	0	0	0	0	0	0	0
NR_126449.1	0	0.149746	0	0.179695	0	0.30085	0	0	0.00165542	0.241705	0.177163	0	0.299432	0	0
NR_126384.1	0	0.560124	0	0	0	0	0	0	0	0	0	0	0	0	0
NR_126028.1	0	0	0	0	0	0	0.131057	0	0	0	0	0	0	0	0
NR_126359.1	0	0.0932665	0.26435	0	0	0.163495	0.283716	0.196545	0.0775707	0.0730303	0.351994	0	0.172799	0	0
NR_126418.1	0.979846	3.81269	3.71807	0.290616	2.16203	1.86058	0.238362	1.23004	0.650305	1.12676	3.04541	0.887144	3.81457	0.303544	2.17748
NR_125792.1	0	0.509857	0.481379	0	0.331483	0.216502	0	0	0.21981	0.197774	0	0.531503	0	0.320366	0.496461
NR_126400.1	0	0	0	0	0	0	0	0	0	0	0	0	0	0	0
NR_125857.1	3.18704	6.50733	7.08177	3.08213	5.96445	3.36811	3.38541	5.88222	4.38098	6.70088	5.67184	3.80581	3.61061	3.81705	4.52983
NR_110731.1	0.117409	0.941518	0.608167	0.161629	0.843052	1.14027	0.189938	0.309069	0.443473	0.427822	1.55624	0.460864	0.888068	0.100761	0.438011
NR_125752.1	0	0	0	0	0	0	0.131131	0.282107	0.322135	0	0.184128	0	0.123652	0	0.121668
NR_104082.1	0	0	0	0	0	0	0	0	0	0	0	0	0	0	0
NR_003260.1	0.0603527	0.0574729	0.246156	0.0235295	0.0627106	0.085685	0.0253955	0.0949782	0.0428647	0.155099	0.155817	0.0221491	0.186483	0	0.209391
NR_033787.2	0.114134	0.897818	0.389137	0.0244127	0.399315	0.405704	0.0363683	0.150516	0.0294296	0.260648	0.679757	0.0934349	0.349227	0.0513403	0.389006
NR_024595.3	0.109661	0.138029	0.319866	0	0.0263356	0.184649	0.0455614	0.152982	0.0361265	0.0477061	0.432291	0.0325485	0.205922	0.0390243	0.26508
NR_125415.1	0.536431	2.02241	1.63269	0.433206	0.473973	0.570513	0.649382	0.606758	0	0.608023	0	0.702183	0.381386	0.287077	2.08475
NR_121620.1	0.0217774	0.036445	0	0.0470048	0.0308569	0.0928547	0.0422765	0	0	0	0	0.0189962	0	0.0186895	0
NR_125388.1	0	0.134263	0.101618	0.0108228	0.0568383	0.0712659	0.0194683	0	0	0.0651013	0.15666	0	0.0857539	0	0
NR_125386.1	0.167969	0.149877	0.354371	0.00894281	0.0400484	0.108194	0.0649161	0.185896	0.024862	0.0110802	0.359513	0.0421338	0.0947674	0.0243699	0.286864
NR_121621.1	0	0.434158	0.262876	0.279976	0	0.368716	0.125906	0.146825	0.752267	0.168411	0	0.339443	0	0.779245	0.322925
NR_031615.1	0	0	0	0	0	0	0	0	0	0	0	0	0	0	0
NR_031643.1	0	0	0	0	0	0	0	0	0	0	0	0	0	0	0
NR_031645.1	0	0	0	0	0	0	0	0	0	0	0	0	0	0	0
NR_031614.1	0	0	0	0	0	0	0	0	0	0	0	0	0	0	0
NR_030625.1	0	0	0	0	0	0	0	0	0	0	0	0	0	0	0
NR_030306.1	0	0	0	0	0	0	0	0	0	0	0	0	0	0	0
NR_030286.1	0	0	0	0	0	0	0	0	0	0	0	0	0	0	0
NM_025031.2	0	0	0	0	0.11076	0.1111	0	0	0	0	0.174446	0	0	0	0.0973025
NM_001256871.1	0	0	0	0	0	0	0	0	0	0.00372546	0	0	0	0	0
NM_001256873.1	0	0	0	0	0	0	0	0	0	0.00372546	0	0	0	0	0
NM_152460.2	0.224074	0.171906	0.363656	0.0773588	0.28124	0.277194	0.114898	0.389806	0.282485	0.281178	0.60234	0.108628	0.368526	0.0256355	0.216397
NR_033149.1	0	0.120412	1.95471	0.0941129	0	0	0	0.0125343	1.33365e-08	0	8.6951e-10	0	0	0	1.35677e-10
NR_037892.1	4.60304	2.78509	3.50356	4.64328	2.06053	2.1965	3.72503	4.48695	1.92908	1.71478	2.48442	1.75712	2.52995	4.30621	1.66621
NR_110880.1	0	0.123352	0.448128	0	0.417755	0	0.0715448	0.0834315	0.284978	0.0956973	0.16449	0	0	0	0.217879
NR_121581.1	0	0	0	0	0	0	0	0	0	0	0	0	0	0	0
NM_001294306.1	0.0939408	0.535033	0.456611	0.384163	0.530817	0.559279	0.163994	0.0902735	0.126722	0.343594	0.713644	0.147035	0.382535	0.177232	0.132458
NR_039634.1	0	0	0	0	0	0	0	0	0	0	0	0	0	0	0
NR_030220.1	0	0	0	0	0	0	0	0	0	0	0	0	0	0	0
NR_001554.2	0	0	0.121368	0	0.0848564	0	0	0	0	0	0	0	0	0	0
NR_030354.1	0	0	0	0	0	0	0	0	0	0	0	0	0	0	0
NR_024121.1	0.793629	3.605	1.14883	0.61178	2.24902	2.57819	0.110048	1.02665	0.876688	1.91358	3.03617	0.494481	0.969478	0.194599	2.25801
NR_026834.1	0.0458873	0.0276204	0.0310144	0.0165073	0	0.0870608	0.0173748	0.0519406	0.0310702	0.0206834	0	0.0133423	0.0910132	0	0.0951981
NR_030193.1	0	0	0	0	0	0	0	0	0	0	0	0	0	0	0
NR_030203.1	0	0	0	0	0	0	0	0	0	0	0	0	0	0	0
NR_120600.1	7.2486	3.77642	3.26438	5.39185	6.74103	3.73032	8.93857	17.7445	10.0615	7.30745	6.94145	2.81359	3.84293	5.32071	5.80691
NR_030157.1	0	0	0	0	0	0	0	0	0	0	0	0	0	0	0
NR_030380.1	0	0	0	0	0	0	0	0	0	0	0	0	0	0	0
NR_030630.1	0	0	0	0	0	0	0	0	0	0	0	0	0	0	0
NR_039815.1	0	0	0	0	0	0	0	0	0	0	0	0	0	0	0
NR_015450.1	0	0	0	0	0	0	0	0	0	0	0	0	0	0	0
NR_002944.2	1.99657	3.11117	2.12679	2.67095	5.44669	6.8364	0.644819	2.0043	0.966883	0.823107	2.43365	3.09874	3.16348	1.2234	2.44448
NR_046649.1	0	0.403062	0	0	0	0	0	0	0.155197	0	0	0	0	0	0
NR_024159.1	0.0278261	0.186271	0.028196	0.105106	0.15771	0.217516	0.0135047	0.236226	0.0537921	0.180637	0.62098	0.0364086	0.0802863	0.0238805	0.259777
NR_039636.1	0	0	0	0	0	0	0	0	0	0	0	0	0	0	0
NR_110947.1	0	0	0	0	0	0	0	0	0	0	0	0	0	0	0
NR_046633.1	0	0	0	0	0	0	0	0	0.224928	0	0	0	0	0	1.47965
NR_027318.2	0	0	0.0194273	0.0215356	0.0401483	0	0	0	0	0	0	0.00823872	0	0.00810571	0
NR_030216.1	0	0	0	0	0	0	0	0	0	0	0	0	0	0	0
NR_024468.1	0	0	0	0	0	0	0	0	0	0	0	0	0	0	0
NR_030221.1	0	0	0	0	0	0	0	0	0	0	0	0	0	0	0
NR_046766.1	0	0	0	0	0	0	0	0	0	0	0	0	0	0	0
NR_046724.1	0.308962	0.503618	1.06782	0.101069	0.805378	0.814811	0.230348	0.502735	0.210157	0.471125	1.2078	0.0776362	0.485556	0.31977	0.526992
NR_122034.1	0.0947642	0.0489386	0.183802	0	0	0.0738857	0.0333373	0.03516	0.126631	0.0325793	0.177869	0.106052	0.302405	0	0.107233
NR_030393.1	0	0	0	0	0	0	0	0	0	0	0	0	0	0	0
NR_030277.1	0	0	0	0	0	0	0	0	0	0	0	0	0	0	0
NR_030373.1	0	0	0	0	0	0	0	0	0	0	0	0	0	0	0
NR_031650.1	0	0	0	0	0	0	0	0	0	0	0	0	0	0	0
NR_110569.1	0.184635	0.555081	0.378585	0.0392378	0.133513	0.766039	0.116742	0.211822	0.250642	0.141613	0.567965	0.0452315	1.24359	0	0.714958
NR_031647.1	0	0	0	0	0	0	0	0	0	0	0	0	0	0	0
NR_033874.1	5.34796	4.47497	4.59441	2.82305	2.22387	3.6352	4.45748	5.79024	4.55114	4	3.89176	4.81707	2.81673	3.59189	3.90733
NR_046731.1	0	0	0	0	0	0	0	0	0	0	0	0	0	0	0
NR_031595.1	0	0	0	0	0	0	0	0	0	0	0	0	0	0	0
NR_036257.1	0	0	0	0	0	0	0	0	0	0	0	0	0	0	0
NR_036173.1	0	0	0	0	0	0	0	0	0	0	0	0	0	0	0
NR_030227.1	0	0	0	0	0	0	0	0	0	0	0	0	0	0	0
NR_030155.1	0	0	0	0	0	0	0	0	0	0	0	0	0	0	0
NR_030392.1	0	0	0	0	0	0	0	0	0	0	0	0	0	0	0
NR_030181.1	0	0	0	0	0	0	0	0	0	0	0	0	0	0	0
NR_046721.1	0.0566448	0.121299	0.0959337	0	0.155612	0.383893	0	0.0127182	0.0112902	0.0473207	0.404623	0	0.0976399	0.010953	0.12957
NR_031682.1	0	0	0	0	0	0	0	0	0	0	0	0	0	0	0
NR_029962.1	0	0	0	0	0	0	0	0	0	0	0	0	0	0	0
NR_030371.1	0	0	0	0	0	0	0	0	0	0	0	0	0	0	0
NR_046571.1	0	0	0.0504598	0	0	0	0	0	0	0	0	0	0	0	0
NR_029409.1	0.368744	0.822803	0.913357	0.57482	0.348321	1.04817	0.119307	0.602893	0.633634	0.797917	0.640038	0.536085	0.583915	0.35162	1.122
NR_015447.1	0.862972	1.77358	1.47275	0.686241	1.67325	1.46321	0.529038	1.23387	0.453648	1.00248	1.68934	0.435808	3.49546	0.480745	1.92225
NR_102711.1	0.218014	0	0	0	0	0	0	0.123387	0	0	0	0	0.155354	0	0
NR_027433.1	0	0	0	0	0	0	0	0	0	0	0	0.0141589	0	0	0
NR_030388.1	0	0	0	0	0	0	0	0	0	0	0	0	0	0	0
NR_039615.1	0	0	0	0	0	0	0	0	0	0	0	0	0	0	0
NR_030212.1	0	0	0	0	0	0	0	0	0	0	0	0	0	0	0
NR_030266.1	0	0	0	0	0	0	0	0	0	0	0	0	0	0	0
NR_024385.1	0	0	0	0	0	0	0	0	0	0	0	0	0	0	0
NR_024620.1	0	0	0.0625114	0	0	0	0	0	0	0	0	0	0	0	0
NR_047031.1	0	0	0	0	0	0.10502	0	0	0	0	0	0	0	0	0
NR_036504.1	3.73925	8.69348	12.7285	1.93923	6.69804	7.06773	1.56848	5.59182	2.47826	4.25413	6.36545	2.09422	7.5241	1.79655	7.63067
NR_046564.2	0.177163	0	0	0	0	0.0839323	0	0	0	0	0	0	0.168325	0	0.294035
NR_125754.1	0	0	1.25414	0	0	0	0	0.233492	0.199386	0	0	0.179936	0	0.708124	0
NR_110948.1	0	0	0	0	0	0	0	0	0	0	0	0	0	0	0
NR_031723.1	0	0	0	0	0	0	0	0	0	0	0	0	0	0	0
NR_030222.1	0	0	0	0	0	0	0	0	0	0	0	0	0	0	0
NR_126362.1	0	0	0	0	0	0	0	0	0	0	0.251097	0	0	0	0.280113
NR_036539.1	11.4062	36.4471	48.1867	4.98338	44.4325	35.9489	5.28485	24.1835	13.1567	17.8513	43.988	3.42672	29.3685	2.86864	38.6049
NR_002211.1	0.0129933	0	0	0.0492818	0	0	0	0.0581668	0.0128976	0	0.0913434	0	0	0	0.0731546
NR_110949.1	0	0	0	0	0	0	0	0	0	0	0	0	0	0	0
NR_030631.1	0	0	0	0	0	0	0	0	0	0	0	0	0	0	0
NR_030207.1	0	0	0	0	0	0	0	0	0	0	0	0	0	0	0
NR_120599.1	0	0	0	0	0	0	0	0	0	0	0	0	0	0	0
NR_125757.1	0	0	0	0	0	0	0	0	0	0	0	0	0	0	0
NR_030186.1	0	0	0	0	0	0	0	0	0	0	0	0	0	0	0
NR_121586.1	0.293377	0.429602	0.89183	0	0.155884	0.260605	0.0355957	0.380867	0.117945	0.0952247	0.245517	0.0639772	1.04528	0	0.252914
NR_103768.1	4.16417	2.16808	2.06288	1.39814	2.09788	0.78912	1.97606	4.29451	5.09831	1.08129	2.68463	1.13007	2.37386	1.58832	2.53411
NM_001309242.1	0	0	0	0	0	0	0.00663018	0	0	0	0	0	0	0	0
NR_126055.1	0	0	0	0	0	0	0.00506189	0	0	0	0.0116379	0	0	0	0
NR_110312.1	0	0	0.0514677	0	0.0119473	0	0	0.00975985	0	0	0	0	0	0	0
NR_132103.1	0.0743019	0.909685	0.652129	0.654609	0.775711	1.45708	0.395582	0.800432	0.113892	0.631045	1.48083	0.405374	1.52854	0.4031	1.18743
NR_132104.1	0.515124	0.309702	1.29018	0	0	0.293243	0.048517	0.0383783	0.205485	0	0	0.30916	0	0	0
NR_132119.1	0.460292	4.52298	4.09501	1.47607	1.29388	3.9736	0.488767	1.32456	0.490301	0.998632	6.13157	0.83766	3.38734	0.323056	1.9584
NR_130761.1	0	0.00397888	0	0.00112236	0	0	0	0	0	0	0	0	0	0	0
NR_103522.1	0	0	0	0	0	0.130246	0	0.238105	0	0.413075	0	0	0	0.298432	0.132738
NR_109775.1	1.14248	1.27464	0.771776	0.821981	0.8094	0.270628	0	0	0.184048	0.247218	1.2748	0	0	0.163413	0.948076
NR_103996.1	11.7516	0	0	3.36023	1.48325	0.70303	8.70924	0.500955	4.41815	4.81576	0	0.822618	2.66002	0.409835	1.13011
NR_103995.1	0.475	0	0	0	1.01153e-09	0	1.45577e-06	8.56481	3.24161e-05	0	0	0	0	0	0
NR_028058.1	0.521081	2.07508	2.32951	0.264931	1.68403	2.01397	0.506532	1.10617	0.487969	1.40088	1.74531	0.765179	2.20543	0.328211	2.60578
NR_003614.3	4.32473	3.88932	6.37409	4.04808	5.64522	1.9429	4.85578	5.21595	4.37809	5.11442	2.33194	3.08504	5.49864	3.16872	2.09343
NR_002217.1	2.72103	13.236	10.4509	5.5996	8.5372	12.53	2.63034	1.86469	4.67208	5.13649	10.9193	3.92603	9.42646	4.76635	4.46565
NR_027775.2	3.61006	1.87865	7.34259	3.41554	3.23526	7.37922	2.18782	3.72419	3.51586	4.31057	5.99908	5.39839	8.54879	5.15446	4.76925
NR_130940.1	3.19683	7.69349	7.08605	5.00928	6.974	3.22351	4.00485	3.03096	5.74062	4.19429	5.61983	4.25945	2.07646	4.83682	5.22015
NR_027777.2	0.612924	1.64074	1.93999	1.13771	1.41364	0.674671	1.05992	0.95955	0.957508	0.587377	1.17764	1.18913	1.3732	0.886567	1.47439
NR_073465.1	0	1.27595	2.1877	0	0.436111	2.92526e-08	0.857123	1.42104	0.00284148	0.0439741	0.334337	0.000183248	1.27393	0.00010622	0.00482394
NR_036103.1	0	0	0	0	0	0	0	0	0	0	0	0	0	0	0
NR_037503.1	0	0	0	0	0	0	0	0	0	0	0	0	0	0	0
NR_039718.1	0	0	0	0	0	0	0	0	0	0	0	0	0	0	0
NR_049858.1	0	0	0	0	0	0	0	0	0	0	0	0	0	0	0
NR_024577.2	0	0	0.45262	0	0	0	0	0.252804	0	0	0	0	0	0	0
NR_037566.1	1.4946	1.50085	2.78042	0.67044	1.76427	1.7923	1.70371	3.70606	1.69043	1.8513	1.84201	0.781371	0.954335	1.29915	2.34389
NR_024494.1	0	0	0	0.0692998	0	0	0	0	0.0497706	0.204712	0.160276	0.155424	0.473744	0	0.692177
NR_132360.1	1.83925	2.49332	1.98391	1.34039	2.20165	2.26323	1.81987	1.69082	1.17754	0.610049	1.03554	1.76432	1.71496	1.06671	1.92049
NM_001291380.1	0	0	0	0	0	0	0	0	0	0	0	0	0	0	0
NR_104195.1	0	0	0	0	0	0.758277	0	0	3.95719	0	2.33863	1.06468	2.40484	1.08198	4.24896
NR_002557.1	3.46534	3.02479	4.71887	2.04033	3.12955	3.85044	1.95911	4.29759	2.94695	1.75214	1.29953	3.38609	4.30228	2.19589	3.80866
NR_002556.1	0	0	0	0	0	0	0	0	0	0	1.29953	0	0	0	0
NR_033906.2	0	0	0	0	0	0	0	0	0	0	0	0	0	0	0
NR_015375.2	0.236124	0	0	0.21182	0.345282	0.0699992	0.163063	0.267273	0.62367	0.199853	0	0.0436483	0.599257	0.121586	0.925703
NR_049850.1	0	0	0	0	0	0	0	0	0	0	0	0	0	0	0
NR_111945.1	0.0158798	0.0129794	0.0157176	0	0	0.0330689	0.00752808	0.0263365	0	0	0	0	0	0	0
NR_040106.1	0	0	0	0	0	0	0	0	0	0	0	0	0	0	0
NR_111947.1	0.0158798	0.0129794	0.0157176	0	0	0.0330689	0.00752808	0.0263365	0	0	0	0	0	0	0
NR_126445.1	0	2.99606	0	0	0.379188	5.83665e-07	4.04705e-09	0	0	0	0.000214491	1.74571e-08	0	0	0
NR_126446.1	0	1.03244	1.45079	0	0	1.30816	0.682375	0.128963	0	0.142705	3.98244	0.405562	0	1.33717	0.447522
NR_132757.1	0	0	0	0	0	0	0	0	0	0	0	0	0	0	0
NR_132755.1	0	0	0	0	0	0	0	0	0	0	0	0	0	0	0
NR_132752.1	0	0	0	0	0	0	0	0	0	0	0	0	0	0	0
NR_132762.1	0	0	0	0	0	0	0	0	0	0	0	0	0	0	0
NR_132770.1	0	0	0	0	0	0	0	0	0	0	0	0	0	0	0
NR_132771.1	0	0	0	0	0	0	0	0	0	0	0	0	0	0	0
NR_132772.1	0	0	0	0	0	0	0	0	0	0	0	0	0	0	0
NR_132768.1	0	0	0	0	0	0	0	0	0	0	0	0	0	0	0
NR_132767.1	0	0	0	0	0	0	0	0	0	0	0	0	0	0	0
NR_132769.1	0	0	0	0	0	0	0	0	0	0	0	0	0	0	0
NR_132783.1	0	0	0	0	0	0	0	0	0	0	0	0	0	0	0
NR_132776.1	0	0	0	0	0	0	0	0	0	0	0	0	0	0	0
NR_132778.1	0	0	0	0	0	0	0	0	0	0	0	0	0	0	0
NR_132774.1	0	0	0	0	0	0	0	0	0	0	0	0	0	0	0
NR_132775.1	0	0	0	0	0	0	0	0	0	0	0	0	0	0	0
NR_132777.1	0	0	0	0	0	0	0	0	0	0	0	0	0	0	0
NR_132784.1	0	0	0	0	0	0	0	0	0	0	0	0	0	0	0
NR_132782.1	0	0	0	0	0	0	0	0	0	0	0	0	0	0	0
NR_132773.1	0	0	0	0	0	0	0	0	0	0	0	0	0	0	0
NR_132975.1	0	0	0	0	0	0	0	0	0	0	0	0	0	0	0
NR_132966.1	0	0	0	0	0	0	0	0	0	0	0	0	0	0	0
NR_132963.1	0	0	0	0	0	0	0	0	0	0	0	0	0	0	0
NR_132788.1	0	0	0	0	0	0	0	0	0	0	0	0	0	0	0
NR_132964.1	0	0	0	0	0	0	0	0	0	0	0	0	0	0	0
NR_132787.1	0	0	0	0	0	0	0	0	0	0	0	0	0	0	0
NR_132789.1	0	0	0	0	0	0	0	0	0	0	0	0	0	0	0
NR_132972.1	0	0	0	0	0	0	0	0	0	0	0	0	0	0	0
NR_132967.1	0	0	0	0	0	0	0	0	0	0	0	0	0	0	0
NR_132852.1	0	0	0	0	0	0	0	0	0	0	0	0	0	0	0
NR_132976.1	0	0	0	0	0	0	0	0	0	0	0	0	0	0	0
NR_132973.1	0	0	0	0	0	0	0	0	0	0	0	0	0	0	0
NR_132974.1	0	0	0	0	0	0	0	0	0	0	0	0	0	0	0
NR_034018.2	0	0	0	0	0	0	0	0	0	0	0	0	0	0	0
NR_132980.1	0	0	0	0	0	0	0	0	0	0	0	0	0	0	0
NR_132981.1	0	0	0	0	0	0	0	0	0	0	0	0	0	0	0
NR_015411.1	0	0	0	0	0	0	0	0	0	0	0	0	0	0	0
NR_133001.1	0	0	0	0	0	0	0	0	0	0	0	0	0	0	0
NR_131786.1	0	0	0	0	0	0	0	0	0	0	0	0	0	0	0
NR_027116.2	0	0	0.123611	0.098739	0.0432123	0.195052	0.0148011	0.172602	0.014739	0.0989887	0.0680591	0.186217	0.130392	0.0392594	0.0569429
NR_126015.1	0.0745969	0.113551	0.222657	0.0265741	0.017108	0.0971231	0	0	0.0113543	0.0783125	0.21443	0	0.0621162	0.0504022	0.126168
NR_126016.1	0	3.03116	3.69852	0.781884	0.79242	2.05941	0.351617	0	0.700281	0	1.79547	2.61775	0	3.00171	2.77711
NR_027115.3	0	0	0	0	0	0	0	0	0	0	0	0	0	0	0
NR_133566.1	0	0.0578708	0	0	0.0489974	0.344034	0	0	0	0	0.0771707	0	0	0	0
NR_126017.1	2.2938	0.642181	0	1.96776	3.47433	0.461206	1.30474	1.14461	0.761838	1.85924	2.01849	1.66538	3.79532	7.11737e-08	0
NR_122120.1	0	0	0	0	0	0	0	0	0	0	0	0	0	0	0
NR_133571.1	0	0.347498	0.547167	0.0635637	0.0806594	0.109457	0.0577629	0.153968	0.0369051	0.0990353	0.0854961	0	0.431298	0.0328751	0.143277
NR_121615.1	0	0.209751	0	0	0	0.356269	0	0	0	0	0	0.109328	0	0	0
NR_125875.1	0	0	0	0	0	0	0	0	0	0	0	0	0	0	0
NR_125876.1	0	0	0	0	0	0	0	0	0	0	0	0	0	0	0
NR_003144.1	0.346842	0	0	0	0	0.44814	0.0842427	0.280925	0.0917135	0.120247	0.20683	0.464717	0	0.0951628	0.229797
NR_037191.1	0.0188543	0	0.229182	0	0.0267061	0.026788	0	0	0	0.0489416	0.168248	0.0328817	0.214893	0.0161754	0.0942971
NR_033942.1	0.777202	2.82159	1.49698	0.2985	2.16339	2.65971	0.218917	0.301181	0.388443	0.611815	2.1799	0.94093	1.53672	0.473022	1.16646
NR_026659.1	0.8808	0.839436	4.08961	0.422265	1.32129	0.686532	1.09301	2.66825	1.10636	0.933833	2.99324	0.743838	1.63691	0.385665	2.13221
NR_133658.1	0	0.690431	0	0	0	0	0	0.155662	0.132924	0	0	0	0.285419	0	0.173559
NR_002968.1	0	0	0	0	0	0	0	0	0	0	0	0	0	0	0
NR_002958.1	0	0	0	0	0	0	0	0	0	0	0	0	0	0	0
NR_003066.1	0	0	0	0	0	0	0	0	0	0	0	0	0	0	0
NR_002980.1	0	0	0	0	0	0	0	0	0	0	0	0	0	0	0
NR_002995.1	0	0	0	0	0	0	0	0	0	0	0	0	0	0	0
NR_002975.2	0	0	0	0	0	0	0	0	0	0	0	0	0	0	0
NR_002977.1	0	0	0	0	0	0	0	0	0	0	0	0	0	0	0
NR_131905.1	0	0	0	0	0	0	0	0	0	0	0	0	0	0	0
NR_023387.1	0	0	4.655e-07	6.80291e-07	3.7182e-07	0	0	0.190379	4.38637e-06	0	0	0	9.37782e-06	5.25547e-06	0
NR_002779.1	0.188003	0.188776	0.685806	0.284052	0.213108	0.320643	0.0729938	0.425606	0.145375	0.195271	0.839109	0.131194	0.535872	0.0968068	0.608449
NR_133663.1	0.633484	0.222235	0.827235	0	0.188029	0.187635	0.393785	2.71572	0.42975	1.17988	1.17848	0.230318	0.598202	0.1133	1.49846
NR_073574.1	6.37474	1.1948	6.83491	1.32468	3.67577	4.20752	0.940012	15.661	3.99944	0.878133	5.51321	1.19667	3.32633	1.18731	2.83204
NR_073573.1	0	2.10904	2.11868e-08	1.55976	2.18735	11.2731	9.15657e-09	0	0	4.81257	3.49704	3.7464e-08	0.218772	0.841747	2.00997
NR_033322.3	7.56507	5.60937	6.17821	3.6266	2.33033	4.60049	6.76196	0.734589	5.05426	6.42189	3.4583	5.54566	6.05259	3.77143	3.83266
NR_033323.3	8.35289	9.56116	14.3134	4.79561	5.08405	6.48878	7.1244	5.48817	7.14403	4.43918	6.63142	7.27373	9.32228	7.05598	8.03328
NR_104013.1	5.31868	6.74999	7.62082	5.63539	2.54886	6.26431	4.00466	9.09295	4.88391	4.44565	6.16283	8.44607	3.74141	4.60149	8.30669
NR_133674.1	0	0	0	0	0	0	0	0	0	0	0	0	0	0	0
NR_037148.1	5.03391	15.2009	18.9901	14.5188	13.2415	16.8492	8.4701	5.64168	11.4525	9.88074	21.6776	6.6347	15.3631	8.68314	11.5701
NR_024151.1	0.03488	0.186667	0.0672698	0.0213385	0.0409097	0	0	0.0242832	0.0692301	0.110156	0.0726143	0.0167686	0.339421	0.0221107	0.176221
NR_110898.1	0	0	0	0	0	0	0	0	0	0	0	0	0	0	0
NR_110897.1	0	0	0	0	0	0	0	0	0	0	0	0	0	0	0
NR_110911.1	0	0	0	0	0	7.70323e-09	0	0	0	0	0	0	0	0	0
NR_110914.1	0	0	0	0	0	0	0	0	0	0	0	0	0	0	0
NR_027094.1	0	0	0	0	0	0	0	0	0	0	0	0	0	0	0
NR_037694.1	0	0	0	0	0	0	0	0	0	0	0	0	0	0	0
NR_077240.1	0.235211	0.338016	0.660801	0.0487436	0.260633	0.273695	0.252928	0.243552	0.126509	0.145085	0.449388	0.0591068	0.459328	0.1437	0.471363
NR_077241.1	0	0	0	0	0	0	0	0	0	0	0	0	0	0	0
NR_104429.1	0.720965	0.454476	0.901914	0.368299	0.333447	0.691094	0.429909	0.638495	0.595545	0.319323	0.614257	1.13831e-10	0.0768367	0.0631449	0.810032
NR_104479.1	0	0	0	0	0	0	0	0	0	0	0	0	0	0	0
NR_033754.2	0.788613	2.27239	3.53257	0.822708	1.50951	1.60652	0.612373	0.790955	1.04175	0.937531	2.67656	0.573247	1.57347	0.135358	2.35593
NR_037573.1	5.63922	4.35577	10.1152	0.479975	4.96424	2.09682	2.03185	11.9534	4.50276	1.65886	5.62391	0.562913	8.51279	0.854749	4.65419
NR_133907.1	0	0	0	0	0	0	0	0	0	0	0	0	0	0	0
NR_045681.1	0	0	0	0	0	0	0	0	0	0	0	0	0	0	0
NR_001278.1	0.226001	0.109728	0.616655	0.0356349	0.362391	0.222888	0.0856354	0.187068	0.0952517	0.08555	0.408756	0.0152728	0.318485	0.0189457	0.358299
NR_023391.1	0.033929	0.171866	0.270117	0.0427875	0.0278778	0.0458201	0	0.0747604	0.0582212	0.121035	0.14544	0.0398686	0.396589	0.0349416	0.293514
NR_103761.1	0	0.0474283	0	0	0.031093	0.0546152	0.0349989	0	0	0.206646	0	0	0	0	0
NR_024585.1	0.553937	1.00239	1.17094	0.260875	0.444409	0.842483	0.349096	0.545678	0.60087	0.508732	1.47121	0.262072	0.818168	0.142025	0.672994
NR_111920.1	0	0	0	0	0.135891	0	0	0.35292	0	0	0	0	0	0	0
NR_134292.1	0	0	0	0	0	0	0	0	0	0	0	0	0	0	0
NR_134288.1	0	0	0	0	0	0	0	0	0.0471635	0	0	0	0	0	0
NM_001110822.1	0	0	0	0	0	0	0.043752	0	0	0	0	0	0	0	0
NM_198285.2	0	0	0	0	0	0	0	0	0	0	0	0	0	0	0
NR_027398.1	0	0	0	0.502303	0	0	0	0.780253	0	0	0	0	0	0.330922	0
NR_026738.1	0.134381	0.167634	0.330173	0.0226617	0.164302	0.0372877	0.0465372	0.020077	0.0397456	0	0	0	0.0979673	0.133321	0.132796
NR_026598.1	11.9958	1.25054	5.15696	5.42778	1.56321	2.75634	6.29333	7.24963	6.33158	3.04955	0.965048	12.5033	0	7.22533	4.31781
NR_024330.1	0.514819	1.21796	2.55078	0.235104	1.16764	1.08789	0.192068	1.4037	0.415748	0.769224	0.69754	0.264388	1.17284	0.341993	2.7029
NR_003545.1	3.84563	6.33191	6.95304	3.53722	4.64768	6.23058	3.409	3.17432	5.09288	3.68183	6.2373	4.5773	6.27498	4.00662	6.09234
NR_027404.1	4.43953	0	1.69474	5.93941	2.09637	3.22676	5.26703	0.854816	1.80802	3.48515	0	1.65143	5.41832	4.87291	4.39154
NR_004394.1	0	0	0	0	0	0	0	0	0	0	0	0	0	0	0
NR_024490.1	5.53509	9.79965	15.7775	3.14286	7.55637	7.83892	3.26551	4.05277	4.92931	4.16864	12.7671	3.17328	9.5035	1.68396	9.42985
NR_038923.1	1.5599	1.44412	2.15235	0.644727	1.31674	1.65098	0.676518	0.976754	0.930318	1.76671	1.18507	1.44753	0.946008	1.85141	1.32201
NR_002955.1	0	0	0	0	0	0	0	0	0	0	0	0	0	0	0
NR_026556.1	0.0050855	0	0	0	0	0	0	0	0	0	0.0340471	0	0	0	0
NR_026781.1	0.22429	0.373986	0.518921	0.183551	0.55869	0.357058	0.245508	0.200041	0.33935	0.199491	0.312834	0.339489	0.222604	0.162179	0.491975
NR_121622.1	0	0	0	0	0	0	0	0	0	0	0	0.0239915	0	0	0
NR_003551.1	0.109318	0.359219	0.420234	0.0745951	0.367267	0.319275	0.11741	0.0391191	0.183727	0.358962	0.462755	0.271317	0.0985081	0.237277	0.430191
NR_002311.1	0	0	0	0	0	0	0	0	0	0	0.0969146	0	0	0	0
NR_024256.1	0	0	0	0	0	0	0	0	0	0	0	0	0	0	0
NR_003659.2	1.86163	6.89936	7.35562	3.67628	3.52142	6.47409	2.37852	4.45584	2.43084	4.24131	3.81684	2.49556	3.15018	2.07654	3.6651
NR_004844.1	2.88627	0.541841	1.25354	1.11352	0.80396	1.02532	1.69411	1.40621	2.44973	0.639064	1.20892	1.00172	0.368005	1.36074	1.09186
NR_037595.1	0	0.0596771	0	0	0	0.0506818	0.0692258	0	0	0.0462977	0	0	0	0.0612064	0
NR_002307.1	0	0	0	0	0	0	0	0	0	0	0	0	0	0	0
NR_002595.1	0.0933527	0.156235	0.0473166	0.0755704	0.132269	0.0663403	0.135926	0.211332	0.293275	0.0909	0.156236	0.12217	0.0665309	0.18034	0.0290487
NM_001284262.1	0	0	0	0	0	0	0	0	0	0	0	0	0	0	0
NM_001301099.1	0	0	3.94804e-10	0	0.229873	0.280728	0	0.0146653	0	0	0.935134	0	0	0	0
NM_145652.3	0	0	0.251176	0	0	0	0	0	0	0	0	0	0	0	0
NM_001301098.1	0.0576191	0.601632	1.22058e-05	0	1.50755	0.122203	0.0175357	0	0.0469984	0	0.874381	0	8.50139e-06	0	0.10705
NM_001284260.1	0	0	0	0	0	0	0	0	0	0	0	0	0	0	0
NM_001284261.1	0	0	0	0	0	0	0.0256975	0	0	0	0	0	0.180375	0	0
NR_073594.1	0	0.276652	0	0.0953965	2.07085e-07	0.290862	1.2211e-07	0	0	0.314403	0.851102	0.0491894	0	0	0
NR_104447.1	3.11597	3.46821	5.96739	6.53583	7.62618	15.2657	6.98794	6.72512	3.55806	7.14931	4.67675	5.70531	0	9.79296	5.39343
NR_103471.1	0	0.000545127	0	0	0	0	0.261085	0	0.346041	0	0.006439	0	0.841383	0.460442	0
NR_122126.1	0	0	0	0	0	0	0	0	0	0	0	0	0	0	0
NR_103528.1	0.0458393	0.000118796	0.337181	0.000473238	0.000496952	6.87747e-07	1.38119e-05	0.409893	0.00837762	0.0635105	8.44843e-06	1.2107e-05	0.00811507	1.48267e-05	0.0419411
NR_110128.1	0.652334	1.38275	1.53833	0	0.969558	2.45594	0.100928	1.48596	0	0.966392	1.59951	0.256399	1.47827	0	1.02734
NR_073391.1	0.697217	0.616086	0	0.124878	0.767098	0.289609	0.282966	0.781102	0.295091	0.52217	0	0.310274	0.342683	0.325574	1.07959
NR_073593.1	0	4.7127e-09	0	5.53549e-06	0.0817386	0	0.583993	1.74931e-10	0.553575	1.32762e-05	0	0	0.829153	0.0551486	0
NR_104443.1	0	0.642166	0.863851	0.145781	5.74544e-10	0	0	0	0	0	0.64099	0	0.179323	0	0.0550301
NR_122125.1	0	0	0	0	0	0	0	0	0	0	0	0	0	0	0
NR_104442.1	0	0	0	0	0	0	0	0	0	0	0	0	0	0	0
NR_110322.1	0	0	0	0	0	0	0	0	0	0	0	0	0	0	0
NR_110191.1	0	1.65547	2.80006	0	1.15093	0.995136	1.1673	1.28214	0.407073	0.457611	1.0831	0	2.54907	0	5.38888
NR_073591.1	0	0.201611	0.433734	0.11114	0	0.424381	0	0.92384	0	0	0	0.127347	0	0.131317	0.167435
NR_103468.1	2.39154e-07	0.00837405	0	0	0.102262	0.00546456	0.0250057	4.0836e-09	0.052845	0	0.429407	0.0393277	1.29379	0	0
NR_110126.1	0.0863603	0	0	4.01216e-10	0	0	0.281884	0	0.467778	0	0	0.739289	0	0.788831	0
NR_110834.1	0	0.494321	10.849	0	0.000164302	0.203469	0	9.06431	0.0610253	5.55285	0.593558	0.00012116	0.00486933	0.0608248	0.000181949
NR_045830.1	0	1.1237e-08	0	0	0	0	0	8.64555e-08	1.55054e-07	0	0	4.81535e-08	6.46829e-07	5.71122e-08	1.17346e-07
NR_110192.1	0	1.18815	1.0962e-07	0	0	3.73277	0	0	0	0.483531	0	0	0	0	0.812695
NR_073078.1	0	0	0	0	0	0	0	0.186276	0	0	0	0	0	0	0
NR_103517.1	0.373008	0.48455	0.0717586	0.115041	0	0.132028	0	0	0	0.496638	0.185443	0	0.466622	0	0.481712
NR_073079.1	0.0561132	0.376347	0.34139	0	0.19911	0.119493	0.108628	0	0.0541598	0.182071	1.00242	0.122301	0.0795652	0.096038	0.5926
NR_130127.1	2.72144	2.54242	0	2.74945	1.50553	5.60515	2.36698	2.11025	3.23767	4.52513	1.70402	0.818621	0	8.62875	0
NR_110193.1	2.0432	11.892	6.01635	2.97654	3.33827	10.2213	0	2.14231e-06	0.207645	2.37393	7.81974	1.35563	11.3812	0.885214	3.51532
NR_111909.1	0	0	0	0	0	0	0	0	0	0	0	0	0	0	0
NR_103467.1	0.670463	0.509136	0	0	0	0.15896	2.87245e-06	1.50521	0.773737	0.746796	0	0.0533024	0	0.0381804	0.117929
NR_109848.1	0	0	0	0	0	0	0	0	0	0	0	0	0.21281	0	0
NR_048552.1	1.12311e-07	2.68472	1.77411	3.70286e-08	0.0901792	0.000236098	2.58738e-09	8.01865e-10	0.0273627	0.00733373	1.74116e-05	4.04551e-06	1.94946e-05	0.00239173	0.128011
NR_110122.1	0.260582	0.682132	0.996333	1.02294	0	0.000596369	0	0.257949	0.337331	0.553637	0.365	0	0	0.00703706	0.273922
NR_120681.1	0	0.405409	9.79726	3.8147	0	3.25328	0	1.54337	0	0	0	0	4.66384	3.14023	0
NR_126049.1	0.0568918	0	0.619799	0.0467881	0.205803	0	0.170458	0	0	0	0	0.148658	0	0	0.094311
NR_026791.1	0.0205852	0.930144	1.12638	0.244373	0.350011	0.555884	0.019981	0.908727	0.258662	0.614704	0.321571	0	0.704097	0	0.845581
NR_102747.1	0.51485	4.68782	2.64635	0.22446	2.15001	3.60085	0	0.841445	1.05779	0.13049	1.87762	0.0010065	5.06688	0.441244	3.79731
NR_027406.1	2.15414	11.8819	8.68413	2.21495	8.23685	8.94755	0.686579	3.79406	1.1873	4.28733	9.84316	4.15045	6.49388	1.11139	6.79775
NR_030211.1	0	0	0	0	0	0	0	0	0	0	0	0	0	0	0
NR_109882.1	0	0	0	0	0	0	0	0	0	0	0	0	0	0	0
NR_028375.2	1.4936	7.09634	1.36759	1.37669	1.60573	1.27629	1.75224	3.10662	4.54632	1.3179	2.64358	1.17632	1.515	0.41712	2.49228
NR_036157.1	0	0	0	0	0	0	0	0	0	0	0	0	0	0	0
NR_102271.1	0	0	0	0	0	0	0	0	0	0	0	0	0	0	0
NR_045211.1	0	0	0	0	0	0	0	0	0	0	0	0	0	0	0
NR_109986.1	0.0230356	0	0.0466836	0	0	0	0	0.0130372	0	0	0	0	0.0328297	0	0
NR_104329.1	0	0	0	0	0	0	0	0	0	0	0	0	0	0	0
NR_103779.1	0.0116236	0	0	0	0.0670704	0	0	0	0	0	0	0	0.0331837	0.019944	0.0288712
NR_030335.1	0	0	0	0	0	0	0	0	0	0	0	0	0	0	0
NR_040005.1	0	0.505707	0.428677	0	0.0428167	0.171792	0.0293312	0.0684087	0.0292081	0.235398	0	0.0263589	0.344528	0	0.188072
NR_030301.1	0	0	0	0	0	0	0	0	0	0	0	0	0	0	0
NR_102369.1	0	0	0	0	0	0	0	0	0	0	0	0	0	0	0
NR_030326.1	0	0	0	0	0	0	0	0	0	0	0	0	0	0	0
NR_125849.1	0.020209	0	0	0	0	0	0	0.0221419	0	0	0	0	0.113818	0.0874401	0
NR_027765.2	0	0	0	0	0	0	0	0	0	0	0	0.00446462	0	0	0
NR_033947.1	0.300884	1.54106	1.3457	1.50582	0.519853	3.49545	0.0175476	0.0841912	0.257697	3.45354	2.57548	1.31219	1.62201	1.22287	2.31816
NR_110288.1	0	0	0	0	0.111641	0	0	0	0	0	0	0	0	0	0.0980768
NR_104139.1	0	0	0	0	0	0	0	0	0	0	0	0	0	0	0
NR_030232.1	0	0	0	0	0	0	0	0	0	0	0	0	0	0	0
NR_031716.1	0	0	0	0	0	0	0	0	0	0	0	0	0	0	0
NR_027249.1	0.141863	0.524217	0.4512	0.276832	0.261035	0.387307	0.0410233	0.241358	0.0990274	0.213109	0.333366	0.201026	0.347129	0.158194	0.312758
NR_038080.1	0.518132	2.25818	4.07515	0.144024	1.98779	2.56058	0.203171	2.93303	0.451473	1.44388	2.25846	0.339527	3.23329	0.0477208	2.26266
NR_030372.1	0	0	0	0	0	0	0	0	0	0	0	0	0	0	0
NR_030378.1	0	0	0	0	0	0	0	0	0	0	0	0	0	0	0
NR_046901.1	0	0	0	0	0.319151	0	0.109363	0	0	0.159712	0.526344	0	0	0	0.560227
NR_122107.1	0	0	0	0	0	0	0	0	0	0	0	0	0	0	0
NR_027284.1	1.24202	5.01059	3.44713	1.371	1.58366	3.88791	0.767826	0.425497	1.24885	1.35266	4.10305	1.36975	2.54343	0.797993	2.13873
NR_003267.1	0	0	0	0	0	0	0	0	0	0	0.0250928	0	0	0	0
NR_030231.1	0	0	0	0	0	0	0	0	0	0	0	0	0	0	0
NR_031665.1	0	0	0	0	0	0	0	0	0	0	0	0	0	0	0
NR_130785.1	0	0	0	0	0	0	0	0	0	0	0	0	0	0	0
NR_036687.1	0	0	0	0	0	0	0	0	0	0	0	0	0	0	0
NR_031613.1	0	0	0	0	0	0	0	0	0	0	0	0	0	0	0
NR_029407.1	2.8827	2.71924	4.6192	1.6579	3.27305	3.70245	1.14581	1.20903	1.94006	2.44548	1.42856	1.97859	2.10778	1.2278	2.31325
NR_030345.1	0	0	0	0	0	0	0	0	0	0	0	0	0	0	0
NR_038390.1	0.0126782	0.0434567	0.102779	0	0.0179637	0.054058	0	0.0143891	0	0.0164957	0.141473	0	0	0	0.0157819
NR_125770.1	0.1419	0	0	0	0.0698921	0	0	0	0	0	0	0	0	0	0
NR_125730.1	0	0	0	0	0	0	0	0	0	0	0	0	0	0	0
NR_037882.1	0.122136	2.14394	1.27721	0.235304	0.00127976	0.781466	0.0460226	0.217755	0.122004	0	0.971955	0	0.413904	2.66438e-07	0.618812
NR_102748.1	0.842625	1.40382	7.20517	1.27489	1.26266	0.0681041	0.41394	6.95269	3.65188e-08	4.62481	3.43463	1.20212	2.58599	0.43944	2.1467
NR_027237.1	0.890165	2.31553	2.43147	0.824926	1.06936	2.57158	0.469586	1.46758	0.823001	1.26878	1.61945	0.945279	1.54443	0.614476	1.43323
NR_105018.1	0.280968	0.093797	0.407979	0.144616	0.511929	0.150392	0.0821876	0.366959	0.0250628	0.241122	0.695235	0.0684217	0.585844	0.136365	0.253982
NR_031589.1	0	0	0	0	0	0	0	0	0	0	0	0	0	0	0
NR_040096.1	0	0.178176	0.215765	0	0	0	0	0	0	0	0	0	0.303468	0.182742	0
NR_027074.1	0	0	0	0	0	0	0	0	0	0.018658	0	0	0	0	0.0178882
NR_126408.1	0	0	0	0	0	0	0	0	0	0	0	0	0	0	0
NR_030287.1	0	0	0	0	0	0	0	0	0	0	0	0	0	0	0
NR_111948.1	0	0	0	0	0	0	0	0	0	0	0	0	0	0	0
NR_030333.1	0	0	0	0	0	0	0	0	0	0	0	0	0	0	0
NR_038441.1	0	0	0	0	0	0	0	0	0	0	0.0942953	0	0	0	0
NR_103840.1	0	0	0	0	0	0	0	0	0	0	0	0	0	0	0
NR_126378.1	0.26572	1.32958	1.00892	0.129984	1.43947	0.779008	0.173158	0	0.439207	0.902201	1.32492	0.721005	0.585988	0.276714	0.254448
NR_102270.1	0	0	0	0	0	0	0	0	0	0	0	0	0	0	0
NR_036686.1	0	0	0	0	0	0	0	0	0	0	0	0	0	0	0
NR_024389.1	0.00404087	0	0	0.0174437	0	0	0	0.0137218	0	0.00524636	0	0.0035248	0	0.0104037	0.0100598
NR_024594.1	0.0309665	0.076837	0.190947	0	0.0871446	0.111508	0	0.34172	0	0.0396053	0.169915	0.0822331	0.350818	0.0263248	0.259958
NR_103538.1	0.0630667	0.211087	0	0.0680621	0	0.179269	0	0.571089	0.243835	0.0818811	1.12594	0.110025	0	0	0
NR_134558.1	0	0	0	0	0.136128	0.048097	0.0488866	0	0	0.172685	0	0.116902	0	0.172636	1.07847e-08
NR_046798.1	0	0	0	0	0	0	0	0	0	0	0	0	0	0	0
NR_027378.1	0.048357	0.0819381	0.106909	0.0379544	0.0996626	0.106216	0.0341365	0.0945442	0.0424915	0.0970286	0.117726	0.0153386	0.112773	0.0339547	0.132056
NR_015384.2	0.0110501	0.100483	0.131409	0.0860621	0.152441	0.0582524	0.0368753	0.0129765	0.0332502	0.0829588	0.106945	0.048033	0.184442	0	0.0962296
NR_120433.1	0	0	0	0	0	0	0	0	0	0	0	0	0	0	0
NR_120513.1	0.728676	0.480249	0.393106	0.0584453	0.622167	0.307879	0.315344	0.88975	0.367849	0.738488	0.605035	0.154564	0.694799	0.140373	0.572994
NR_122110.1	0.162245	0	0.0274003	0.0291827	0.0690231	0.115297	0.0262472	0	0.0522741	0.0175539	0.0603456	0.0117937	0	0.0348099	0.0168297
NR_125417.1	0.340127	0	0	0.489424	0	0.805686	0.110048	0	0	0.147199	0.846715	0	0	0	0
NR_125760.1	0	0	0	0	0	0	0	0	0	0	0.612375	0	0	0	0
NR_125819.1	0.0599612	0.0686386	0.131061	0	0.0579248	0.00839493	0.00589429	0.0604784	0.0653652	0	0.210265	0.00508144	0.0339565	0.0299417	0.124398
NR_125945.1	0.68624	0.0820314	0.496687	0.476098	0.0694534	0.209	0.190314	0.49935	0.37903	0.509122	0.109389	0.598599	0.279431	0.1262	0.305074
NR_126391.1	0	0	0	0	0	0	0	0	0	0	0	0	0	0	0
NR_126402.1	0	0	0	0	0	0	0	0	0	0	0	0	0	0	0
NR_126405.1	0	0	0	0	0	0	0	0	0	0	0	0	0	0	0
NR_126414.1	0	0	0	0	0	0	0	0	0	0	0	0	0	0.200836	0
NR_130736.1	0	0	0	0	0	0	0	0.0193346	0	0	0.0381194	0	0	0	0.0212622
NR_130776.1	0.170715	0.285696	0	0	0.483779	0	0.0227487	0	0.165009	0	0	0	0.486596	0	0
NR_130929.1	0.0394254	0.186665	0.194532	0.0692237	0.0939609	0.110948	0.0117977	0.0919258	0.0527177	0.235104	0.0735765	0.0833614	0.114332	0.050463	0.192103
NR_002768.2	0.19107	2.13135	2.10519	0.215592	0.614664	1.80028	0.144036	0.107893	0.292063	0.191694	3.26038	0.07638	1.31368	0.111743	0.580441
NR_133925.1	1.02921e-10	2.44269	1.82921	6.01575e-09	1.04358e-08	1.7546	0.213917	0.676499	1.0478	3.87615e-08	0.961628	4.99435e-11	0.7631	0.264709	3.78402e-10
NR_133934.1	0.61553	0.00545111	0.79809	0.674158	0.524522	0.594505	1.11911	0.276484	1.17859	0.328577	1.83627	0.580091	0.82455	0.396448	1.69956
NR_133935.1	1.05273	1.15551	1.20148	0.400657	0.196268	0.58932	0.636882	0.314814	0.77128	0.307672	0	0.251754	0.46623	0.322104	0.167234
NR_133937.1	0.298826	0	0	0	0	0.587377	0	0	0	0	0	1.56706	0	0.399669	0
NR_133936.1	1.09258	0.00782099	1.28972	1.62271	1.17794	0.34351	1.42483	0.242631	1.63184	0.720925	2.10659	1.74798	1.0837	0.635804	1.08366
NR_134284.1	0.418167	0.737906	1.23042	0.241939	0.74259	1.56003	0.211894	2.12566	0.389784	0.898581	0.225701	0.923784	0.402361	0.211758	1.71366
NR_134285.1	0	0	0	0	0	0.332036	0	0	0.11267	0	0	0.0252606	0	0	0
NR_024019.3	0.12016	0.216998	2.27437	0.148528	0.414328	1.43814	0.190515	0.293401	0.296378	0.282002	1.17178	0.435655	0.875272	0.164884	0.605101
NR_134316.1	1.15384	0	0	0	0	0	0.586307	0	0.570171	0.730471	0	0	0	0	0.00050063
NR_134531.1	0	0	0	0	0	0	0	0	0	0	0	0	0	0	0
NR_134532.1	0	0	0	0	0	0	0	0	0	0	0	0	0	0	0
NR_134533.1	0	0	0	0	0	0	0	0	0	0	0	0	0	0	0
NR_134654.1	0.876814	2.9888	7.77599	0.380229	2.37193	2.48652	0.330189	3.10648	0.786778	1.05684	4.4737	0.15398	3.35189	0.135543	3.82356
NR_134652.1	0.456798	0.355255	0.604931	0.471531	0.50498	0.461148	0.64644	0.1562	0.345547	0.125867	0.66371	0.386761	0	0	0.318964
NR_134656.1	0	0	0	0	0	0	0	0	0	0	0	0	0	0	0
NR_026749.2	0.024209	0	0	0	0	0	0	0	0	0	0	0	0	0	0
NR_045117.1	0	0	0	0	0	0	0	0	0	0	0	0	0	0	0
NR_033399.1	1.86465	14.5787	10.621	3.13861	4.76399	11.7608	1.11878	3.97184	1.79815	4.26008	11.2324	1.63973	10.3159	2.09048	7.0455
NR_051985.1	0	0	0	0.0577926	0	0	0	0	0	0.073028	0	0	0	0	0
NR_134639.1	0.195888	0	0.837815	0	0.241871	0.504045	0	0.624834	0.0543822	0.644355	0	0	2.24107	0	0.660399
NR_134852.1	0	0.116215	0.246283	0	0.0737968	0.0246744	0	0.019651	0	0.0676201	0.0439815	0.0356898	0	0	0.0195781
NR_046447.1	0	0	0	0	0	0	0	0	0	0	0	0	0	0	0
NR_046445.1	0	0.0268129	0	0	0	0	0	0	0	0	0	0	0	0	0
NR_046448.1	0	0	0	0	0	0	0	0	0	0	0	0	0	0	0
NR_046450.1	0	0	0	0	0	0	0	0	0	0	0	0	0	0.0320257	0
NR_046451.1	0	0	0	0	0	0.00813851	0	0	0	0.0509795	0	0	0	0	0
NR_046449.2	0	0	0	0	0.0406221	0	0	0.0601221	0.154094	0	0	0	0	0	0
NR_027024.1	0	0	0	0.0113759	0	0	0	0	0	0	0.0470473	0	0	0	0
NR_036506.1	1.73546	0.306715	0.371251	0.887644	1.29633	1.30026	0.79889	0.827277	1.05958	1.06751	1.83593	0.717703	0.783021	0.3927	0.796087
NR_073206.1	0	0	0	0	0	0	0	0	0	0	0	0	0	0	0
NR_073207.1	0	0	0	0	0	0	0	0	0	0	0	0	0	0	0
NR_003133.2	0	0	0	0	0	0	0	0	0	0	0	0	0	0	0
NR_002454.2	0	0.182761	0.221318	0.315451	0.154738	0	0.212004	0	0.211114	0.708934	0.239203	0.0952602	0	0	0.210949
NR_036447.1	1.74136	13.1764	9.57392	1.99724	6.41362	13.5066	1.01197	2.36495	1.16727	4.42078	7.43922	2.38131	8.17222	1.47632	7.1003
NR_028597.1	0	0	0.0348468	0.0368833	0	0.0967862	0.0664892	0	0.0502062	0	0.0755611	0.0749467	0	0	0
NR_040718.1	8.18245	10.1599	16.9723	6.13125	8.50868	5.38448	7.18172	9.94185	4.91561	9.18264	7.04308	13.5551	9.67419	4.1305	8.82625
NR_003569.1	0	0	0	0	0	0	0	0	0	0.0157993	0	0	0	0	0
NR_132758.2	0	0	0	0	0	0	0	0	0	0	0	0	0	0	0
NR_132759.2	0	0	0	0	0	0	0	0	0	0	0	0	0	0	0
NR_132760.2	0	0	0	0	0	0	0	0	0	0	0	0	0	0	0
NR_135095.1	0	0.0172243	0.0225752	0.00444351	0	0.00861663	0.0124758	0.00442922	0.00197635	0	0.00415974	0	0.00649842	0.00184198	0.0103405
NR_024035.2	0	0.100322	0.119767	0.020823	0	0.0412958	0.0556984	0.0220716	0.00933843	0	0.0219645	0	0.0268671	0.00820411	0.0479444
NR_002774.3	0.132816	0.479827	0.592449	0.166456	0.255985	0.281748	0.07027	0.133955	0.0719638	0.11499	0.453906	0.067104	0.676789	0.0383702	0.454118
NR_135073.1	0.215081	0.0520018	0.370033	0.232643	0.131289	0.30462	0.277544	0.181823	0.0469978	0.258531	0.801294	0.169379	0.491926	0.0265913	0.198508
NR_040068.1	0	0	0	0	0.1978	0	0	0	0.120665	0	0	0	0	0	0
NR_040066.1	0	0	0	0	0	0	0.037776	0.0734529	0	0	0	0	0	0	0
NR_134608.1	4.11666	5.74701	7.96154	6.694	5.07836	8.28121	7.43178	6.00603	7.77206	4.06645	7.7861	3.02588	4.11172	4.66875	5.44013
NR_134677.1	0	0.551759	0	9.05564e-10	5.74542e-10	0	0.226874	0.445066	1.57902	0	0.291961	0	0	0	0
NR_135082.1	2.63254	1.70765	1.06713	1.31218	5.31943	0.217984	1.06454	0.936383	5.40729e-08	1.36135	1.77703	2.56601	3.98254	2.51861	3.06085
NR_135104.1	1.23444	5.54638	10.8508	3.22042	1.74572	4.65091	1.01019	3.65135	1.78658	3.04085	8.4694	0.226021	6.00008	1.95099	1.82414
NR_135105.1	1.46597	2.61963	13.8816	5.2872	3.83744	8.50998	3.15685	5.37085	1.62408	4.68838	7.72341	0.617635	8.10796	0.977702	5.46275
NR_135128.1	0.00800662	0.0543155	0.110281	0.00895761	0.0230379	0.0338216	0.015175	0.0480303	0	0.0307887	0.0219437	0.0070115	0.0964049	0.0147481	0.063112
NR_003521.1	0.558844	2.28696	3.05833	1.01351	1.51663	2.48618	0.449115	1.1745	0.908049	1.11359	2.07486	0.819635	2.16706	0.770612	1.56233
NR_003561.2	0.323025	1.12915	1.65273	0.472227	1.14456	1.06907	0.294147	0.604838	0.177578	0.414701	1.48084	0.250051	1.24014	0.153987	1.01723
NR_027768.1	0.0986292	0	0	0	0	0	0	0	0.0434365	0	0	0	0	0	0.111876
NR_023382.1	1.163	1.57878	1.63705	1.03218	1.29448	1.69356	0.86928	1.21236	0.690485	0.9312	1.87689	1.12283	1.33327	0.56745	1.26715
NR_038243.2	0	0.230499	0.0930425	0.0495475	0.130104	0.783022	0.0891269	0.467706	0	0.476859	0.409828	0.320381	0.785172	0.078802	0.228593
NR_135121.1	0.114431	0	0	0	0.192139	0	0.0534042	0	0.0988318	0	0	0.0340565	0	0.121417	0
NR_047593.2	0.0362305	0.176395	0.145227	0	0	0.0921866	0.0696338	0.0443824	0	0.0157191	0.0367784	0	0.101375	0	0
NR_132338.1	0	0	0	0	0	0	0	0	0	0	0	0.0486131	0	0	0
NR_131766.1	0	1.13686	1.36972	0.687106	0.456397	1.00151	0.541647	0.0344252	0.100236	0	0.397357	1.50652	0	0.309057	0.256119
NR_104256.1	0.506989	0.814456	0.474289	0.358026	0.209217	0.449858	0.344016	0	0.251061	0.252169	0.238512	0.702658	0	0.945234	0
NR_126534.1	0.0786063	0.823825	0.153525	0.0976038	0.296282	0.495374	0.0384099	0.231469	0.0796001	0.218986	0.425845	0.151779	0.416922	0.0685509	0.146577
NR_134477.1	0.0114176	0.123597	0.0251052	0	0.0818835	0	0	0.0107973	0.122718	0.0154384	0	0.0443585	0	0.0257127	0
NR_038099.1	0	0	0	0	0	0	0.0787073	0	0	0	0	0	0.491758	0	0
NR_037141.1	0	0.155347	0	0.100179	0	0	0	0	0.179447	0	0.341097	0	0	0	0
NR_135153.1	2.71721e-08	1.21593	1.18037	1.38446e-07	1.7018	5.0645e-08	2.16945e-10	0.329637	0.281475	1.95053e-10	1.29981	0.436751	0.0142952	1.24531e-07	0.286476
NR_027490.1	0	0.292821	0	0	0.754757	0	0	0	0	0	0.286939	0	0	0	0
NR_109773.1	0.259429	0.332894	0.112016	0.144938	0.11868	0.217437	0.1587	0	0.187246	0.181105	1.03451	0.0775918	0.629587	0.0993218	0.130977
NR_104247.1	0.61599	0.787349	3.23647	0.68083	1.50459	1.64903	0.390399	1.9721	0.74382	1.6622	2.09814	0.431187	2.04125	0.206735	0.885186
NR_104238.1	0.0364073	0	3.39404e-08	0	0	0.709968	5.24959	15.1542	0.00055579	6.91184e-10	3.12185e-06	0.35673	0.0250039	0.625917	2.00485
NR_104248.1	3.33547	2.30529	2.44791	2.72939	2.25452	3.2837	4.5281	5.90764	3.82154	2.46099	3.57105	3.10775	3.48545	2.29617	3.67486
NR_104235.1	1.49389	2.51981	4.37454	5.16274	3.36253	3.12531	2.9965	1.77565	1.31299	3.71078	3.90281	2.48909	0.677201	2.5319	2.07162
NR_033801.1	0.0732263	0.117481	0.0403617	0	0.0281048	0.0769579	0	0.105781	0.0582681	0	0.0442807	0	0.0852775	0	0.062626
NR_002594.1	1.43571	2.49331	3.07825	0.442101	0.925136	2.1377	0.897106	1.01516	1.11396	0.504041	3.46181	0.48893	2.01387	0.233385	2.25128
NR_002314.3	0	0	0	0	0	0	0	0	0	0	0	0	0	0	0
NR_135169.1	0.0647485	0.0865265	0.164776	0.0416055	0.0896675	0.091673	0.0496714	0.142168	0.0641106	0.0374694	0.195219	0.0557147	0.0966323	0.0303967	0.139828
NR_134516.1	0	0	0	0	0	0	0	0	0	0	0	0	0	0	0
NR_034089.1	0.927473	2.09938	2.86553	0.641851	1.82114	1.60432	0.546239	1.66006	0.576597	1.28239	2.15592	0.756186	1.67496	0.542216	1.89957
NR_002913.1	0	0	0	0	0	0	0	0	0	0	0	0	0	0	0
NR_132753.1	0	0	0	0	0	0	0	0	0	0	0	0	0	0	0
NR_002963.1	0	0	0	0	0	0	0	0	0	0	0	0	0	0	0
NR_003021.2	0	0	0	0	0	0	0	0	0	0	0	0	0	0	0
NR_002966.1	0	0	0	0	0	0	0	0	0	0	0	0	0	0	0
NR_033768.1	0	0	0	0	0	0	0	0	0	0	0	0	0	0	0
NR_033907.2	0.748327	2.44297	1.91458	0.473514	1.32243	2.5835	0.815283	2.2468	1.2966	1.2623	2.69252	0.963613	1.95762	0.82651	3.11552
NR_003019.1	0	0	0	0	0	0	0	0	0	0	0	0	0	0	0
NR_121212.1	0	0	0	0	0	0	0	0	0	0	0	0	0	0	0
NR_125889.1	0	0	0	0	0	0	0	0	0	0	0	0	0	0	0
NR_135201.1	0	0	0	0	0	0	0	0	0	0	0	0	0	0	0
NR_027003.1	0	0	0	0.0648261	0.441811	0	0	0	0	0.121413	0	0.294616	0	0.337702	0
NR_003563.1	1.17393	3.05304	3.24023	0.758128	1.70333	2.8785	0.878771	1.92	0.816965	1.6352	2.28245	1.27604	1.67045	0.70519	2.0966
NR_135254.1	0	0	0	0	0	0	0	0	0	0	0	0	0	0	0
NR_003700.1	4.27872	11.2019	12.0998	8.31691	7.76907	11.3731	4.23707	6.40087	5.91673	6.72957	9.34954	5.15514	9.70462	5.71198	7.1784
NR_135280.1	0	0	0	0	0	0	0	0	0	0	0.021315	0	0	0	0
NR_135288.1	0	0	0	0	0	0	0	0	0	0	0	0	0.0272858	0	0
NR_135291.1	0.0107781	0.0360748	0.0218427	0	0	0	0	0	0	0	0.0240528	0	0	0	0
NR_135300.1	0	0	0	0	0	0	0	0	0	0	0	0	0	0	0
NR_029408.1	5.33624	4.12881	5.52195	4.07704	2.61017	6.00835	4.30669	4.85781	4.3933	3.7569	4.97296	4.46204	7.10753	3.2812	4.4687
NR_110253.1	0.382192	0.166601	0	0	0	0	9.88503e-08	0	0.013109	1.01633	1.21295	0	0	0	0.140892
NR_110254.1	0	8.37593e-09	0	1.23026e-06	0	0	0	0	0	0	0	0	0	0.542038	0
NR_135321.1	0	0	0	0	0	0	0	0	0	0	0.0301043	0	0	0	0
NR_135275.1	1.34804	0.107401	0.983647	2.24346	0.000144434	0	1.79385e-07	0.144517	0.0308874	5.6354e-10	3.85794	2.92221	0	1.32975	2.27778e-08
NR_024010.1	0	0	0	0	0	0	0	0	0	0	0	0	0	0	0
NR_031764.1	0	0	0	0	0	0.0271673	0	0.0216364	0	0	0	0	0	0	0.0476849
NR_102299.1	0	2.01127	0	0.000772427	0.000458551	0.471997	0	0	0	1.21557e-10	2.56667e-10	0.207636	0	0	0
NR_135296.1	3.78238	0	5.85582	1.67753e-09	2.73889e-07	5.23424e-07	0.00406471	16.553	5.44935	5.1941e-06	0.00465349	7.13884	3.42143e-05	0.178908	3.6868
NR_135323.1	0.11256	0	1.75141e-08	0.279767	0	0.640992	0.102138	0.239826	0.458879	0.692124	0.595899	0.680492	2.25861	0.251686	0.25597
NR_047672.1	0	0	0	0	0	0	0	0	0	0	0	0	0	0	0
NR_135470.1	0	0.863222	0.864246	0	0.846316	0	0	0.357319	0.173617	0	0.456175	0.340775	0.865235	0	1.06424
NR_135471.1	2.29281e-07	0	0	1.5208e-07	0	0.654588	1.25084	0.000132615	0	0	4.66481	1.72344	0.617462	0	1.80459
NR_135481.1	0	0	0	0	0	0	0	0	0	0	0	0	0.5632	0	0
NR_001573.2	0	0	0	0	0	0	0	0	0	0	0	0	0	0	0
NR_024602.1	0	0	0	0	0	0	0	0	0	0	0	0	0	0	0
NR_003539.1	0	0	0	0	0	0	0	0	0	0	0	0	0	0	0
NR_002712.1	0	0	0.0324695	0	0	0.0527556	0	0.0181353	0	0	0	0	0	0	0
NR_135492.1	7.12887	4.13332	0	1.60555	0.736291	0	0.688148	4.05386	2.74312	7.03445	1.68502	1.83331	6.23221	4.30455	0
NR_135601.1	0.00787924	0	0	0	0	0	0	7.77915e-09	6.03736e-06	0	0	0	0	0	0
NR_135607.1	0.551212	6.77325	7.34879	1.96182	1.60892e-07	0.00135584	0.0009798	2.50786	3.01784	1.7268e-05	1.0996	0.0007023	4.12717e-08	1.14401	4.29767
NM_001321163.1	0	0	0	0	0	0	0	0	0	0	0	0	0	0	0
NR_135605.1	0	4.66305e-08	0	0	0	2.14614e-07	0	4.47607e-07	0.0940385	0	0	0.438263	0.000254508	1.60962e-10	7.29517e-08
NR_135615.1	0	0	0	0	0	0	0	0	0	0	0	0	0	0	0
NR_135619.1	0	0	0	0	0	0	0	0	0	0	0	0	0	0	0
NR_033815.2	0	0	0	0	0	0	0	0.0216421	0	0.0504017	0.203955	0	0	0	0
NR_135622.1	0	0.0997021	0	0	0	0	0	0	0	0	0.790179	0	0	0.121411	0.230346
NR_036206.1	0	0	0	0	0	0	0	0	0	0	0	0	0	0	0
NR_135528.1	0	0	0	0	0	0	3.42817e-08	0	0	0	0	0	0	0	0
NR_038103.1	7.33102	5.03263	16.5379	5.98121	20.0151	10.9631	8.87636	30.2742	18.5292	15.1031	16.4746	12.5151	18.3692	24.8514	17.9781
NR_038104.1	0.664381	14.4546	0	6.94483	6.74021	0	3.3549	3.93793	1.76957	2.49306	0	4.36809	2.51985	2.7093e-09	8.19136e-06
NR_135599.1	0.171486	0.142224	0	0	0	0.363011	0	0	0	0	0.32786	0	0	0	0
NR_135598.1	0	1.11897e-08	0	0	0	1.51276e-07	0	1.5634e-07	0.206858	0	0	1.05403e-07	0	0	0.000173308
NR_135602.1	7.49868e-10	0	4.30368e-08	0	0.174864	0	0	4.78091e-05	0.211619	0	2.04162e-07	0	0	0	0
NR_135600.1	0	2.47744e-08	0	0	0	0	0	0	1.13965e-05	0	0	0.00904195	6.50681e-10	0	4.75794e-05
NR_135603.1	0	0	2.85749e-08	0	0	0	5.01354e-06	0	0	1.13386e-05	0	3.3865e-05	0	9.37902e-08	0
NR_135604.1	0	2.75241e-05	0.0607355	2.95062e-10	1.49072e-08	0.000316973	3.09244e-09	7.95156e-08	0	9.52867e-06	0	0	0	5.79344e-11	4.77915e-06
NR_135606.1	0	0	0	0	0	0	0	2.9913e-09	1.82431e-05	0	0	0	0	0	0
NR_104245.1	0	0	0	0.0121429	0	0	0	0	0	0	0	0	0	0.0440665	0
NR_028287.1	0	0.0654275	0.079096	0.0633913	0	0.0555311	0	0	0	0.0257946	0.0867491	0.0169684	0.166535	0.20292	0.0243215
NR_003954.1	0	0	0.0496831	0	0	0.0382542	0	0	0	0	0	0	0	0	0
NR_026551.1	17.4271	29.8343	33.7351	20.5717	19.4622	27.8646	12.6108	21.7642	13.7043	16.101	20.1836	30.036	24.121	21.4737	21.2596
NR_135667.1	0	0	0	0	0	0	0	0	0	0	0	0	0	0	0
NR_073010.2	0.120487	0.323675	0.406352	0.0862579	0.13741	0.251975	0.218724	0.128784	0.124709	0.126621	0.593154	0	0.198042	0.0198612	0.353005
NR_135666.1	0	0	0	0	0	0	0	0	0	0	0	0	0	0	0
NM_001321551.1	0	0	0	0	0	0	0	0	0	0	0	0	0	0	0
NR_135737.1	0.460533	0.192678	1.16664	0	0	0.490906	0	0.260643	0	0	0	0.200859	0.984508	0.098808	0.286628
NR_135628.1	0	0	0	0	0	0	0	0.00142869	6.73798e-08	0	0.0473115	0	0	0	0
NR_135755.1	3.2929e-05	0	0	0	0	0	0	1.38739	3.74708e-05	0	0.841934	0	0	5.15695e-08	0
NR_135759.1	0.180452	0	0	0	0	0	3.2958e-09	0.0334835	0.736785	1.00453	0.0298495	3.42818e-10	0	0	0.000719782
NR_135756.1	0.00228952	0	0	9.07005e-11	0	0	2.3571e-09	0.519787	1.45024e-05	0.000877184	0.304461	9.18546e-10	0	0.00992273	0
NR_135757.1	0	0	0	0	0	0	0	0	0	0	0	0	0	0	0
NR_135754.1	0.000260313	0	1.12782e-08	0	0	1.13706e-10	0	0.158705	0	0	0.0136642	0	0	6.27551e-07	0
NR_135758.1	0	0	6.53285e-10	3.08084e-10	0	0	0	0	0	0	0	0	9.51231e-08	0	0
NR_028102.1	0.14714	0.0949709	1.62644	4.39292	0	4.03548	4.32682	5.11054	10.6009	6.03341e-07	2.87055	0.186604	0	3.26886	2.09869
NR_135659.1	0	0.0646681	0.321184	0	0	0.171991	0	0.16427	0	0	0.554003	0	0	0	0
NR_135661.1	0	0.388757	0.433381	0	0	0.0374314	0	0.0476682	0	0	0.369416	0	0	0	0
NR_135660.1	0.00146581	8.764e-05	0.00132559	1.04598e-05	0	1.09169e-05	0.405054	0	1.37753	0	0.171756	0	0	0.0607112	0
NR_135662.1	0.330558	0.750187	2.30494	2.21187	0	0.755915	0.77486	1.30322	0.00366257	4.44224e-07	1.83735	0.124378	0	3.44495	0.243701
NR_135663.1	0.167777	1.34575	0	3.24678e-05	0	0	0	0	0	3.01709e-09	0	0.00706323	0	0	0
NR_135664.1	0.00305873	0.000561574	0.00177522	5.15019e-06	0	2.10063e-06	0.0800621	0	0.000925959	0	0.11128	0	0	0.0625172	0
NR_135824.1	0	0.0707486	0.277248	0.0831359	0.156747	0	0	0.204775	0.122678	0.132047	0.115633	0.0830366	0	0.0292026	0.199345
NR_133644.1	0	0	3.40753	0	0.458128	1.5196e-08	0	1.8841e-07	0	1.05948e-09	0	0	0	0	0.000198214
NR_136147.1	0	0	0	0	0	0	0	0	0	0	0	0	0	0	0
NR_033846.2	0	0	0	0	0	0	0	0	0	0	0	0	0	0	0
NR_104312.1	15.703	10.1667	10.2846	6.48572	7.61085	9.93672	13.8508	22.193	12.4767	14.3456	8.26187	7.82348	10.1491	6.05083	11.7545
NR_104313.1	0.990179	0	7.42841	0.798579	0	0	2.1047	12.782	3.85519	1.75141	0	4.05518	0	1.54306	0
NR_135815.1	0	0.103848	0.0650485	0.040379	0.264117	0	0.030022	0	0.171433	0.0496688	0	0	0	0	0.0492299
NR_136176.1	0	0	0	0	0	0	0	0	0	0	0	0	0	0	0
NR_136183.1	1.1671e-10	1.36126	3.63953	7.9868e-06	1.02997	1.80089e-06	1.41252	9.6472e-07	4.13351e-07	3.49874	0.0474203	0.548791	1.85739	0.317869	0.752241
NR_136182.1	0	1.41411e-09	0.138748	0	1.35872	7.52176e-07	0.00477105	5.82091e-07	5.53898e-05	0.000382488	3.7315	3.12463e-06	2.87073	0	0.0132104
NR_136184.1	0.0422321	4.42661e-09	0.107015	0	2.9745	2.60571	0.00434635	5.58821	0.0320279	0.000471053	4.69087	3.76109e-05	3.0628	0	0.095911
NR_136217.1	0	0	0	0	0	0	0	0	0	0	0	0	0	0	0
NR_104031.1	0	0	0	0	0	0	0	0	0	0	0	0	0	0	0
NR_136221.1	0.0644938	0	0.0653963	0.0956094	0.0462719	0	0.196671	0.234367	0.159538	0.104595	0.182944	0.0562693	0.421444	0.0423579	0.103137
NR_136222.1	0	0	0	0	0	0	0	0	0	0	0	0	0	0	0
NR_134902.1	0	0	0	0	0	0	0	0	0	0	0	0	0	0	0
NR_134901.1	0	0	0.186616	0	0	0	0	0	0.0558208	0	0	0	0	0	0
NR_135078.1	0.000107688	0	0.495106	0	0	0	3.70121e-08	0.02054	1.88019	1.60845	0	0	0.00436444	0	1.83772e-06
NR_134905.1	0.0487775	0.199905	0	0.0473127	0	0	0.0214635	0.100008	0	0	0	0.096761	0	0	0
NR_134904.1	0	0	0	0	0.207413	0.0353599	0	0	0	0.069073	0	0	0	0.205521	0
NR_136249.1	0.0572119	0.0957454	0.301456	0.0493948	0.0972776	0.211415	0.0111065	0.181325	0.0110599	0.148559	0.204282	0.0499052	0.130459	0.0883791	0.128187
NR_136244.1	0	0.20096	0	0	0	0.436659	0.0656487	0	0.0565188	0.379587	0	0.0510055	0	0	0
NR_001575.1	0.19171	0.258504	0.136923	0.109121	0.246634	0.241469	0.228296	0.216732	0.135318	0.0610154	0.488645	0.0346682	0.435136	0.139096	0.232623
NR_003129.1	0.374333	0	0.129704	0	0.0904933	0.272235	0.577983	0.502833	0	0	0	0.115517	1.03554	0.355212	0.0818668
NR_136250.1	0	0	0	0	0	0	0	0	0	0	0	0	0	0	0
NR_136268.1	0	0	0	0	0	0	0	0	0	0	0	0	0	0	0
NR_110563.1	0	0	0	0	0	0	0	0	0	0	0	0	0	0	0
NR_136309.1	0	1.39738	0.26724	1.03498	0.572403	0	0	0	0	0	0	0	0	0	0
NR_104097.1	0	0	0	0	0	0	0	0	0	0	0	0	0	0	0
NR_104096.1	0.268115	0.710987	0.571195	0.0923409	0.399319	0.405778	0.174472	0.344616	0.184336	0.207027	0.757623	0.270696	0.719969	0.160986	0.80301
NR_104095.1	5.01014e-05	6.48307e-05	8.5264e-05	2.65392e-05	3.99838e-05	0.000103585	6.47611e-05	7.16024e-05	5.07151e-05	4.27474e-05	0.000115951	5.91222e-05	0.000400895	6.05056e-05	0.000244119
NR_136306.1	2.76947	5.2353	5.08683	2.56126	0.886085	1.95718	1.75726	1.6311	1.4357	1.39396	2.99869	2.00559	1.32734	1.04373	0.79391
NR_026716.2	0	0	0	0	0	0	0	0	0	0	0	0	0	0	0
NR_136242.1	7.71185	12.8926	10.4737	14.5232	18.5144	15.4977	10.4261	11.4633	10.8215	15.9163	13.6133	9.79537	17.9301	12.6065	12.2564
NR_046331.1	0.504634	1.79553	0.462986	0.561373	0.433901	0.251686	0	0.606073	3.46975e-08	0	0.448752	0.0900206	3.01984e-07	0.112429	0.546291
NR_134911.1	0.404847	0.934715	0	0	0.502091	0.633651	0	1.68873	0.198764	0	0.57386	0	3.08882	0	0
NR_027712.1	0	0.0771805	0.0310015	0.01657	0.0540513	0.0217215	0	0.0259262	0.00735308	0	0	0.00672357	0	0.0134592	0.0761434
NR_136541.1	1.09335	1.33884	1.48687	0.422572	0.807179	1.04891	0.899843	1.04114	0.750417	1.26228	1.34268	0.231355	1.7161	0.556331	1.55985
NR_136551.1	0	0	0	0	0	0	0	0	0	0	0	0	0	0	0
NR_027791.3	0.0433385	0.284344	0.187398	0.100293	0.0450102	0.0234468	0.122518	0.0911069	0.226198	0.0375843	0	0.170393	0.106064	0.0999413	0.247242
NR_136549.1	0	0	0.173581	0	0	0.0301515	0	0	0	0.0234652	0	0	0	0	0.0200597
NR_136548.1	0	0	0	0	0	0	0.0608707	0	0	0	0	0	0.0524653	0.0424484	0.038591
NR_136547.1	0.038742	0	0.10982	0.0115754	0	0.0456467	0	0.0440122	0.0944141	0.0333596	0	0.0439211	0.143316	0	0
NR_136544.1	0.0810169	0	0.168228	0	0.426662	0	0.000158913	0.128261	0	0.120765	0	0.0398667	0	0.208801	0
NR_136545.1	0.422271	0.230295	0.249942	0.238637	0	0.284607	0.579954	0.324975	0.348569	0.220493	0.376646	0.145742	0.403239	0.1083	0.515554
NR_111004.2	0	0	0	0	0	0	0	0	0	0	0	0	0	0	0
NR_111005.2	0	0	0	0	0	0	0	0	0	0	0	0	0	0	0
NR_136543.1	0	0	0	0	0	0	0	0	0	0	0.0343171	0	0	0	0
NR_136575.1	0	0	0	0	0	0	0	0	0	0	0	0	0	0	0
NR_136574.1	0	0	0	0	0	0	0	0	0	0	0	0	0	0	0
NR_136576.1	0	0	0	0	0	0	0	0	0	0	0	0	0	0	0
NM_152769.2	0.197891	0.827537	0.950544	0.149652	0.998064	0.868338	0.0200957	0.167612	0.0538293	0.824546	1.02672	0.230059	0.906466	0.247734	0.91724
NR_135924.1	2.5342	0	1.07145	0.28829	0.344538	0	2.29247	1.42758	1.9754	0.587439	1.19703	2.71646	0	2.13282	0.0149508
NR_135923.1	0	0.0108487	0.12836	0.194176	0	0.726889	0	0	0	0.120326	0	0.247647	0	0	0.655064
NR_130760.1	0	0.21572	0	0.0210944	0	0	0	0	0	0	0	0.0352094	0	0	0.20173
NR_136591.1	0.39788	0	1.21743	0.0307598	0	0	0.281028	1.36306	0.528804	0	0	0.365627	0	0.289987	1.85526
NR_136592.1	0.1028	0.744004	2.46095	0.443339	0.601972	1.17884	0.296879	0.233592	0.196761	0.303056	0.508017	0.220439	1.98406	0.208363	0.64438
NR_136641.1	0	0	0	0	0	0	0	0	0	0	0	0	0	0	0
NR_136637.1	0.188003	2.25483	2.92102	0.371972	0.821353	1.20241	0.0608282	1.09948	0.242291	0.56954	1.57333	0.355317	1.20571	0.242017	1.44312
NR_136625.1	0	0	0	0	0	0	0	0	0	0	0	0	0	0	0
NR_136624.1	0	0	0	0	0	0	0	0	0	0	0	0	0	0	0
NR_136638.1	0.0539697	0	0	0.0366369	0	0	0.0329515	0	0	0.0690549	0	0	0.290289	0	0
NR_136644.1	0.322945	1.39197	3.11454	0.250658	0.695954	1.24743	0.170844	2.92404	0.216632	1.13191	1.61973	0.11754	1.38181	0.0898245	1.938
NR_136590.1	0	0.157441	0.485472	0.167298	0.614102	0.124259	0	0	0.116342	0.444465	0.862942	0	0	0	0
NR_136639.1	0	0	0	0	0	0	0	0.0580706	0	0	0	0	0	0	0
NR_136667.1	0	0.0621593	0	0	0	0	0	0.105321	0	0	0	0	7.18664e-10	0	0
NR_136666.1	0	0	0	0	0	0.219683	0	0	0	0	0	0	0	0	0
NR_136665.1	0	0	0	0	0	0	0	0	0	0	0	0	0	0	0
NM_001024661.2	0	0	0	0	0	0	0	0	0	0	0	0	0	0	0
NR_136664.1	0	0.139606	0	0	0	0	0	0	0	0	0	0	0	0.0576797	0
NM_001324076.1	0.12224	0	0.397894	0	0	0	0	0	0	0	0	0	0	0	0.12454
NR_136708.1	0.13103	0.153497	0.0265543	0	0.0371317	0.129766	0	0	0.113985	0.0680477	0.0292411	0	0.0373479	0.191165	0.0688908
NR_136706.1	0	0	0.0306979	0	0.0643887	0.127051	0.0588119	0.0514374	0.0423474	0.0196665	0.135216	0	0.215879	0	0.131986
NR_027840.1	0	0.38025	0.833471	1.07803	0.546114	0	0.155498	0	0	0.631167	1.21936	0.969696	0	0.290623	0.688298
NR_104629.1	0	0	0	0.439046	0	0	0.32004	1.39626	0.933503	0	1.07671	1.75211	1.21717	1.32529	4.33904e-10
NM_001291475.1	0	0	0	0	0	0	0	0	0	0	0	0	0	0	0
NM_001291474.1	0	0	0	0	0	0	0	0	0	0	0	0	0	0	0
NM_001291473.1	0	0	0	0	0	0	0	0	0	0	0	0	0	0	0
NM_001291471.1	0	0	0	0	0	0	0	0	0	0	0	0	0	0	0
NM_001291469.1	0	0	0	0	0	0	0	0	0	0	0	0	0	0	0
NM_001291468.1	0	0	0	0	0	0	0	0	0	0	0	0	0	0	0
NR_111970.1	0	0	0	0	0	0	0	0	0	0	0	0	0	0	0
NR_130638.1	0.195597	0	0	0	0.772834	0	0.592153	0.305805	0	1.85239	0	0	0.516238	0.253786	0
NR_110369.1	0	0	0	0	0	0	0	0	0	0	0	0	0	0	0
NR_130145.1	1.83726	1.21507	0.441813	1.25643	1.82203	1.13756	2.22275	1.32811	1.44988	1.88666	1.94346	1.51525	0.439424	1.71301	0.78958
NR_130144.1	0	0.318937	1.4317	0	0	0	0.246429	0.277479	0	0	0	0	0.0336094	0	0
NR_130143.1	0.0911834	0.568644	0.378607	0	0.171023	0.247418	0	0.105732	0	0.168864	2.35867	0.157131	0.266251	0	0.522854
NR_027503.1	0	0	0	0	0	0	0	0	0.0821292	0.109758	0	0	0	0	0.0988782
NR_073509.1	0	0.0396577	0.084969	0.0239967	0.0367237	0	0	0.0293599	0	0	0	0	0	0	0
NR_038450.1	0.224994	0	0	0	0	0	0	0	0	0	0	0	0.533238	0	0
NR_024054.2	2.38443	9.27196	4.19294	2.97783	2.64068	4.18841	1.5212	2.41327	0.0865607	2.29575	4.75949	2.26181	2.61158	1.58919	2.79445
NR_015433.1	15.8039	19.505	31.7678	12.7398	16.0598	27.6894	11.1469	14.2819	12.5678	15.6319	19.8058	16.08	24.931	9.56197	20.5505
NR_111973.1	2.14541	3.32777	2.89045	1.42893	1.5446	2.15965	1.59672	1.86913	1.96498	1.45232	3.37617	1.63862	2.22272	1.08829	2.5083
NR_036683.1	0.0972824	0.108663	0.396486	0.0484048	0.0461172	0	0.0314741	0.260914	0.0939308	0.0841134	0.144579	0.0282702	0	0.0555997	0.404076
NR_110759.1	0.0418225	0.28121	0.0637855	0	0.133728	0.13412	0	0.0829459	0.0608746	0.0272103	0.093426	0.00916777	0.0299123	0.0179836	0.0914333
NR_104151.1	0	0	0	0	0	0	0	0	0	0	0	0	0	0	0
NR_003288.2	0.370078	1.26521	1.38514	0.320072	0.646501	0.852399	0.477075	0.476696	0.58801	0.388337	1.44074	0.12331	0.872651	0.0500678	0.827725
NR_026921.1	0	0.098373	0.0528676	0	0.126684	0.023259	0.0124493	0.0131442	0.0261616	0.096398	0	0	0	0	0.0669564
NR_126565.1	0	0.137704	0	0	0	0	0	0	0	0	0	0	0	0	0
NR_034031.1	11.5618	29.0085	19.1611	17.4969	16.3719	28.232	8.81599	6.95854	10.6898	12.4609	15.7575	24.1042	18.4693	11.9297	15.3271
NR_104050.1	0	0	0	0	0.388312	0	0	0.343963	0	0	0	0	2.72179	0.63199	0.927395
NR_104051.1	0.223513	0.694655	3.71552	0	0.529231	2.09499	0.28915	3.38254	0.103744	0.00132118	0	0	1.15663	0.00478328	0
NR_033412.1	0.0826206	0.166669	0.584633	0.0597725	0.135221	0.426101	0	0.0887288	0	0.154426	0.308819	0	0.116507	0	0.163761
NR_033420.1	0.0657673	0.331339	0.192675	0.0286415	0.246887	0.187961	0.0392045	0.171347	0.0260371	0.0919925	0.263126	0.0357063	0.11579	0.0346522	0.192411
NM_001271682.1	0.096757	0	0	0.313263	0	0.0687588	0	0.0547604	0.140284	0.0628111	0.323891	0.1266	0	0.0415187	0.0602198
NM_001040105.1	0	0	0	0	0	0	0	0	0	0	0	0	0	0	0
NR_136654.1	2.55502	0	1.23449	0	1.93025e-08	0	0.000152564	16.0456	5.04715	0	0	0	4.01696	0	1.0685
NR_104456.1	0.150431	5.29077	0.352272	2.14818	0.163645	0.0897551	0	0	0.218688	0.537929	0	0.255475	0.87967	2.95247	0
NR_136657.1	0.0221129	0.63835	0.506636	0.287358	0.866739	0.533813	0.114927	0.197514	4.14286e-07	0.0148474	0	0.226399	0.205799	0.161146	0.210376
NR_136655.1	0.167185	0.77358	0	0.492068	0.557216	0	0.139855	0.698933	0	0	0	0.392411	0	0.152625	1.01281
NR_136656.1	2.00579	0	1.85838	0.78875	1.05193	0.797938	1.70352	0	0	0.710488	0	1.2239	4.72795e-08	0.665011	0.223628
NR_024608.1	0	0.0825862	0	0.0723918	0	0	0.0162513	0.037822	0.0160027	0.0438327	0	0.0290791	0	0.0721051	0.0826523
NR_034158.1	0	0	0	0	0	0	0	0	0	0	0	0	0	0	0
NR_002734.2	0	0	0.318007	0	0	0.114422	0.382892	0.266544	0.228947	0	0	0.070471	0	0	0.396761
NR_002824.3	1.81536	18.3995	13.5806	4.04265	7.82664	13.4858	1.03054	2.57204	1.90528	5.51593	14.3981	2.18215	11.9666	2.03689	7.8542
NR_133665.1	0	0	0	0	0	0	0	0	0	0	0	0	0	0	0
NM_001001671.3	0.237635	0.994221	1.39931	1.04976	0.875004	0.962953	0.315778	0.268984	0.447737	0.927417	1.0636	0.572536	0.753718	0.689686	1.39239
NM_001301233.1	0	0	0	0	0	0	0	0	0	0	0	0	0	0	0
NM_001105677.2	0	0	0	0	0	0	0	0	0	0	0	0	0	0	0
NR_135910.1	0	0	0	0	0	0	0	0	0	0	0	0	0	0	0
NR_135912.1	0	0	0	0	0	0	0	0	0	0	0	0	0	0	0
NR_135911.1	0.0375911	0.0825858	0.321852	0.0391423	0.0798375	0	0.00995088	0.0329649	0.0409773	0.0804376	0.148369	0.0419673	0.0505043	0.0225809	0.0827039
NR_135913.1	0	0	0	0	0	0	0	0	0	0	0	0	0	0	0
NR_024466.1	1.80517	2.28604	2.71237	1.69116	1.50562	2.86872	1.98623	0.60983	1.8006	2.77948	2.59818	3.04001	2.12521	1.98332	3.01797
NR_109858.1	0	0	0	0	0	0	0	0	0	0	0	0	0	0	0
NR_075077.1	0.0348031	0.0291219	0	0	0	0.0213243	0	0	0.0280523	0.0942176	0	0	0	0	0.0433216
NR_110991.1	0	0	0	0	0	0	0	0	0	0	0	0.0234912	0	0	0
NR_120651.1	0	0	0	0	0	0	0	0	0	0	0	0	0	0	0
NR_033255.1	8.82996	22.4422	32.8548	17.8536	16.6591	24.2786	29.7709	42.161	23.8552	18.528	14.6591	17.322	12.6137	19.7586	12.6794
NR_134318.1	1.56605	8.97453	11.914	9.79988	6.77277	5.43442	4.61901	1.25491	10.7013	1.06518	12.4272	1.94671	6.65347	5.83283	3.15863
NR_134906.1	0	0	0.169172	0	0.0727184	0.135406	0	0	0	0.0663402	0	0	0.169387	0	0.203086
NR_134903.1	0	0	0	0	0	0	0	0	0	0	0	0	0	0	0
NR_126442.1	0.669042	0.959977	1.80204	0.730687	1.12846	1.87031	0.163879	0.853423	0.708034	0.480058	0	0	1.7148	0.286745	0.948481
NR_136298.1	0	0	7.45557e-10	0	0	1.24196	0	0.355501	2.55349e-05	0.253818	0	0.524292	1.62168	1.69608e-07	0.264952
NR_130900.1	0.199515	0.890779	0.693775	0.0921843	0.359089	0.37979	0.234295	0	0.119186	0.165432	0.354636	0	0.397204	0.323635	0.180753
NR_130142.1	0	0	0	0	0	0	0	0	0	0	0	0	0	0	0
NR_135297.1	0	0	0	0	0	0	0	0	0	0	0	0	0	0	0.0713802
NR_135282.1	3.48544	3.85956e-08	5.6146	1.0899e-05	4.65342	3.03076	4.35388	2.75486	3.04735	0.008317	1.44782	4.90439	5.58202	0.000745222	4.0982
NR_130977.1	0	0	0	0	0	0	4.62928e-09	2.99897e-09	0	0	0	0	0	0	0
NR_024113.1	17.6803	18.2941	21.0183	18.7501	19.6408	20.9502	14.3409	8.39491	18.8858	15.6715	20.5738	20.9122	14.3947	14.8373	13.4965
NR_126006.1	0	0	0	0	0	0	0	0	0	0	0	0	0	0	0
NR_036496.1	8.47246	4.75709	6.09236	4.94143	4.76422	5.29526	7.06765	5.22423	5.54162	5.43817	5.41433	5.60263	7.28632	4.56732	7.03823
NR_040115.1	0	0	0	0	0	0	0	0.0297369	0	0	0.0543045	0	0	0	0
NR_027277.2	0.181988	0.12412	0.248604	0.0263882	0.0367272	0.520138	0.0832659	0.223509	0.0503804	0	0.289432	0	0.273705	0.104275	0.0641466
NR_046444.1	0	0	0	0	0	0	0	0	0	0	0	0	0	0	0
NR_104155.1	0	0	0	0	0	0	0	0	0	0	0	0	0	0	0
NR_136542.1	0	0	0	0	0	0	0	0	0	0	0	0.0163541	0	0	0.018374
NR_135286.1	0.00939716	0	0.0571324	0.0101415	0.02663	0	0.00912134	0	0.0181661	0	0	0	0	0	0
NR_046201.1	1.46524	2.18487	1.92738	1.0542	1.447	1.19901	1.12055	1.51692	1.16608	1.15295	0.891788	0.818507	2.54764	0.695475	1.16065
NR_026833.1	0	0	0	0	0	0	0	0	0	0	0	0	0	0	0
NR_033379.1	0	0.100011	0.0463504	0.025805	0.0508058	0	0.0116048	0.0676633	0.0115585	0.108998	0.0919077	0.0312839	0.0837478	0.0410486	0.0148811
NR_033862.1	0	0	0	0	0	0	0	0	0	0	0	0	0	0	0
NR_038864.1	0.0372195	0.125832	0.0404998	0.032329	0.0631964	0.0186662	0	0.0209496	0.00944177	0.0347442	0.0202438	0	0.0508515	0.0306216	0.0595658
NR_134458.1	0	0	0	0	0	0	0	0	0	0	0	0.0627764	0.140597	0	0.0604503
NR_027379.1	0.0248531	0.0192306	0.0241131	0.0372038	0.0325662	0.0326638	0.0446152	0	0	0.0336608	0.0519465	0.0300705	0.0667275	0	0.143661
NR_135292.1	0.563966	1.59066	0.702637	0.465174	1.1789	1.13114	0.364935	0.501178	0.302044	0.968528	0.897099	0.617518	1.02886	0.0907662	0.92639
NR_136642.1	0.0139261	0	0.0413899	0	0	0	0	0	0.00558481	0.019096	0	0	0	0	0.0143843
NR_027392.2	0	0.5315	0	0.150951	0.618943	0.113556	0.052876	0	0	0.0551848	0	0.011077	0.259196	0	0.103925
NR_135825.1	0	0.0375292	0.112395	0	0	0.0472942	0	0	0	0.0432031	0.125736	0	0.0948481	0	0.11431
NR_046102.1	0.113677	0.158749	0	0.214112	0.206942	0.277027	0.154407	0.0597278	0	0.0628543	0	0	0.138529	0.0827005	0.131668
NR_029420.1	0.564557	1.16283	2.33225	0.44524	0.8307	0.585455	0.653369	1.49927	1.17533	0.451064	1.55063	1.23114	0.557024	0.987646	0.429411
NR_046101.1	0.421951	0.424191	0.783085	0.257994	0.615769	0	0.444854	0	0.511891	0.335203	0.270571	0	0.449366	0.308777	0.464483
NR_134320.1	0	0	0	0	0	0	0	0	0	0	0	0	0	0.0660578	0
NR_134321.1	0	3.30261e-05	0.883556	0.0258333	0.218643	0.109657	0.933671	0.335893	0.135268	0	0	0.00460289	0.370446	0	0
NR_134322.1	0.27911	0.344718	0	0	0.0797136	0	0	0.391875	0	0.101229	0.251097	0	0	0.120491	0.722976
NR_135243.1	0.0238016	0	0.048236	0	0	0	0	0	0.11503	0	0	0	0.0678427	0	0
NR_135244.1	0	0	0	0	0	0	0.0124385	0	0	0	0.0285978	0	0	0	0
NR_039983.2	0.11206	0.121517	0.969468	0.0582413	0.421369	0.475521	0.00395	0.292112	0	0.057612	0.101447	0.189451	0.747798	0.0559737	0.512732
NR_135279.1	0	0	0	0	0	0	0	0.276732	0	0	0	0	0	0	0
NR_111905.1	0	0	0	0	0	0	0	0	0	0	0	0	0	0	0
NR_038941.1	0.353731	0.770702	0.786312	0.161422	0.646399	0.114783	0.294625	0.595471	0.101367	0.334137	0.855726	0.0763127	0.755005	0.324419	0.635654
NR_135301.1	0.333883	1.64366	1.99028	0.188405	0.635229	0.561821	0.158941	0.693659	0.223539	0.526817	1.17069	0.166429	0.686869	0.195587	1.32907
NR_126024.1	0	0	0	0	0	0	0	0.245423	0	0	0	0	0	0	0
NR_027434.2	0	0	0	0	0	0	0	0	0	0	0	0	0	0	0
NR_111930.1	0.76226	0.57544	0.344101	0.206055	0.734108	0.453052	0.424779	0.468564	0.469962	0.363594	0.5248	0.489848	0.46295	0.0244236	0.943981
NR_027069.1	0.134335	0	0	0	0	0	0	0	0	0	0	0	0	0	0.249516
NR_103851.1	0	0	0	0	0	0	0	0	0	0	0	0	0	0	0
NR_037695.1	0	0	0	0	0	0	0	0	0	0	0	0	0	0	0
NR_136593.1	0.0606166	0.198278	0.439529	0.0247728	0.0886193	0.0481724	0.0115484	0.0559213	0.021888	0.0572018	0	0.0286705	0	0.0372228	0.106606
NR_051986.1	0	0	0	0	0	0	0	0	0	0	0	0	0	0	0
NR_040025.1	0	0	0	0	0	0	0	0	0	0	0	0	0	0	0
NR_037850.2	0	0	0	0	0	0	0	0	0	0	0.085535	0	0	0	0
NR_135482.1	0	0	0	0	0	0	0	0	0	0.650494	0	0	0	0	0
NR_134559.1	2.06436	2.18279	1.74682	0.837452	2.32394	2.56304	0.793912	0.779665	0.818248	1.84023	2.31331	1.96928	4.25983	0.766314	2.18956
NR_135283.1	0	0	0	0.384687	0	0	0	0	0	0.154264	0	0.414573	0	0	0.2958
NR_135284.1	0	0	1.12171	0	0.261421	0.262223	0	0	0	0	0	0	0	0	0
NR_046098.1	0.220821	0.36797	0.62488	0.23226	0.293526	0.451724	0.047136	0.303572	0.21158	0.0600517	0.759395	0.0513791	0	0	0.346979
NR_040092.1	1.31623	0.445511	0.923021	0.660728	0.805772	1.27099	0.616833	0.744434	0.59816	0.492861	0.296995	0.893391	0.545802	0.957087	0.73264
NR_123723.1	1.45722	2.83235	4.81553	1.72961	1.80723	3.61791	1.37049	1.54416	1.55672	0.718639	2.11717	3.12498	3.72784	1.88077	2.70137
NR_028492.1	0.09715	0.377825	0.728581	0.104788	0.0702645	0.206277	0.0957893	0.219048	0.125231	0.0418741	0.623079	0.112539	0.418076	0.0691986	0.368681
NR_015419.2	0.225489	0.167197	0.405988	0.188756	0.137514	0.161682	0.177585	0.292548	0.268367	0.1021	0.0488273	0.229769	0.0737772	0.262615	0.284744
NR_130894.1	0	0.118642	0.287344	0	0	0	0	0	0	0	0	0	0	0	0.0882457
NR_131903.1	0	0	0.671431	0	0.2964	0.298482	0.203046	0	0.101097	0.271857	1.16707	0.456176	0.894377	0	0.26607
NR_046554.1	0	0	0	0	0	0	0	0	0	0	0	0	0	0	0
NR_110029.2	0	0	0	0	0	0	0	0	0	0	0	0	0	0	0
NR_047508.1	0	0.204572	0.743191	0	0.173205	0	0	0	0	0	0.81839	0	0	0	0
NR_046988.1	0	0	0	0	0	0	0	0	0	0	0	0	0	0	0
NR_104244.1	0	0	0	0	0	0	0	0	0	0	0	0	0	0	0
NR_110152.1	0	0	0	0.176624	0	0	0	0	0	0	0	0	0	0.0702272	0
NR_126503.1	0	0	0	0	0	0	0	0	0	0	0	0	0	0	0
NR_134534.1	0.0765578	0	0	0	0.0542381	0.0544046	0	0	0	0	0	0	0	0	2.7471e-08
NR_027489.1	0	0	2.02894e-08	0	6.66653e-08	0	0	0	0	2.27404e-06	0	0	0	0	0.0613893
NR_135630.1	0	0	0	0	0	0	0	0	0	0	0	0	0	0	0
NR_135051.1	0.0105597	0	0	0	0	0	0	0	0	0	0.0239564	0	0.0300987	0	0.0136237
NR_046667.1	0	0	0	0	0	0	0	0	0	0	0	0	0	0	0
NR_103790.1	0.466933	0.549728	0.17385	0	0.811141	1.09211	0.126003	0.62706	0.0414041	0.333515	0.953466	0.521194	0.364947	0.0366305	1.02837
NR_136286.1	0.670754	0.663421	1.2906	0.295829	0.829094	0.824525	0.376683	0.915147	0.634039	0.559283	0.817659	0.499854	0.967034	0.461711	1.16372
NR_125396.1	0	0	0.269948	0.197269	0	0	0.517176	0.317174	0	0.345884	0	0.464767	1.17738	0.135594	0
NR_135079.1	0.658634	4.07829	2.09451	1.9049	2.82787	1.96494	0.575372	0.491073	1.04373	0.898356	2.29885	0.861778	2.63363	1.01744	2.09786
NR_110415.1	0	0.252379	0.315358	0	0.123	0.34227	0.0802408	0.364139	0.164283	0.212618	0.531604	0.272439	0	0.140626	0.301257
NR_120421.1	0.340485	0.0997932	0	0	0	0	0	0	0	0	0	0	0	0	0.726925
NR_120331.1	0.374136	0.994094	0.44858	0.293038	0.42151	0.849375	0.181827	0.0909502	0.136248	0.735852	0.780755	0.230979	1.179	0	0.684257
NR_121213.1	0	0	0	0	0	0	0	0	0	0	0	0	0	0	0
NR_130737.1	0.0180418	0.266433	0.219569	0.020738	0.0767097	0.10829	0.0875738	0.0626466	0.0384285	0.0493154	0.219204	0	0.160474	0.0312906	0.136326
NR_110291.1	0.225849	0.979426	1.21075	0.206322	0.450022	0.543433	0.255155	0.978936	0.256303	0.655744	1.3073	0.0208454	0.476809	0.307632	0.897854
NR_125400.1	0.438981	2.44882	0.296544	0	0	0	0	0.16563	0	0	0	0.127639	1.25125	0	0.546428
NR_131171.1	0	0	0.778429	0.0460593	0.423307	0.242632	0.165704	0.241544	0.123757	0	0.190487	0.111684	0	0.0732542	0.0531249
NR_125960.1	0.207764	0.817361	0	0.323169	0.236244	0.413254	0.384031	0	0.126751	0.33214	0.232309	0.525832	1.7148	0	0.505786
NR_110845.1	2.28108	4.86542	5.05927	0.947892	2.76507	5.35377	1.62814	3.50239	0.990187	4.81791	2.63156	4.04809	1.65776	0.820162	3.14748
NR_110846.1	1.18804	0.956235	2.06903	1.27506	0	0.450217	0.840203	4.42832	2.26647	0.103138	4.22562	0	3.14045	0.389375	1.30571
NR_126473.1	0	0	0	0	0	0.351816	0	0.280191	0	0	0	0	0	0	0
NR_110942.1	0.366269	0.152048	1.39787	0	0.686792	2.76576	0	0	0.766142	0	1.31995	0.560952	0.900197	0.370869	0.461199
NR_120559.1	0	0	0	0	0	0	0	0	0	0	0	0	0	0	0.112045
NR_003683.2	0	0.451632	0.495001	0.0526777	0.218071	0.147209	0	0.495659	0.16923	0.353662	0.32012	0.159154	0.138654	0	0.170507
NR_125970.1	0	0	0	0.574503	0	0	0	0	0	0	0	0	0	0	0.265053
NR_111915.1	0.218896	0.224892	0.241737	0.0488443	0.208864	0.222267	0.11699	0.296436	0.0542059	0.127395	0.298526	0.0698437	0.346681	0.0710469	0.351868
NR_126367.1	1.48441	0.991358	1.32251	1.92307	0	0.344199	0.233879	1.37035	1.22657	1.48319	0	1.42407	1.04808	0.362713	0.317095
NR_125911.1	0	0	0	0	0	0	0	0.304739	0	0	0	0	0.255794	0	0
NR_125974.1	1.9036	7.11768	7.39957	1.57007	5.30211	4.83401	0.452227	4.02685	1.11516	5.54188	7.0102	3.21452	4.0552	0.870085	4.48997
NR_125808.1	0	0	0	0	0	0	0	0	0	0	0	0	0	0	0
NR_120475.1	0	0	0	0	0	0	0	0	0	0	0	0	0	0	0
NR_136218.1	0	0	0	0	0	0	0	0	0	0	0	0	0	0	0
NR_136219.1	0	0	0	0	0	0	0	0	0	0	0	0	0	0	0
NR_136220.1	0	0	0	0	0	0	0	0	0	0	0	0	0	0	0
NR_029426.1	0.444191	6.3881	6.38716	2.0994	2.61579	4.62962	0.182416	3.67207	0.897761	1.51576	3.99702	1.15273	5.26347	1.38551	6.34173
NR_110619.1	0.448995	0.659862	0.8559	0.134876	0.521741	0.653874	0.320079	0.36003	0.125705	0.314626	0.544727	0.270678	0.506481	0.106949	0.840796
NR_125822.1	0.661619	2.21447	3.19024	1.00948	1.61631	1.97795	0.952227	0.723073	1.05849	0.829377	1.62924	0.53732	2.40607	0.646122	1.05075
NR_130738.1	0	0.175039	0	0	0	0	0	0.11839	0	0.135796	0	0	0	0.359049	0.39058
NR_125930.1	0.0701255	0.0390971	0.236629	0.0252072	0.0662218	0.331902	0.0453342	0	0.0225895	0.0909888	0.10428	0.0611177	0.266251	0.100206	0.29073
NR_125931.1	0.255836	0.747965	0.849886	0.119196	0.250575	0.635953	0.115359	0.652211	0.157212	0.237699	0.600998	0.121768	0.596709	0.0673817	0.327374
NR_133003.1	1.05036e-07	0	0	0	0	0	0	0	0	0	0	0	0	0	0
NR_120374.1	0	0	0	0	0	0	0	0	0	0	0	0	0	0	0
NR_125796.1	3.12247	2.04503	2.99331	3.27544	1.80241	1.50224	1.65208	1.97848	2.10754	1.51879	1.72087	3.32447	2.16832	2.28569	2.65946
NR_135178.1	0.174791	0.750089	0.457075	0.257269	0.235708	0.347	0.137863	0.361089	0.0954569	0.0584123	0.546348	0.120658	0.173736	0.179194	0.423618
NR_120486.1	0.0767079	0.379474	0	0	0	0	0	0.171109	0.511401	0	0.168676	0	0	0	0.157058
NR_120487.1	0	0	0.218111	0	0.304991	0.764818	0.313397	0	0	0.139732	0	0	0.920301	0.092364	0.312231
NR_120307.1	0.111671	0.341416	0.341834	0.235128	0	0	0	0.0951334	0	0	0.224423	0	0.636599	0	0.259495
NR_125345.1	0.115133	0.0982832	0.291659	0.217443	0.281911	0.0825769	0	0.35993	0.0556425	0.22563	0.48096	0.0502147	0.902466	0.0746281	0.302776
NR_110883.1	0.573444	2.49515	1.39456	0.371319	0.162505	2.11905	0.667936	1.428	0.554277	1.19123	2.81539	0.500208	0.653805	0.295279	0.949902
NR_126372.1	0	0	0	0	0	0	0	0	0	0	0	0	0	0	0
NR_126388.1	0	0	0	0	0	0	0	0	0	0	0	0	0	0	0
NR_126389.1	0	0	4.49693	0	0.613488	0.888124	0.400999	0.530812	0	0.641352	0	0	0	0	0.210063
NR_126404.1	0.116986	0.105268	0	0	0.125502	0	0.128206	0	0.465653	0	0	0.341681	0	0.367127	0
NR_126469.1	0	0	0	0	0	0	0	0	0	0	0	0	0	0	0
NR_040057.1	0.327504	0.320813	0.712144	0.164984	0.0499196	0.105277	0.475346	0.140178	0.186755	0.154466	0.227238	0.0551343	0.827786	0.0411383	0.397357
NR_132100.1	0	0	0	0	0	0	0	0	0	0	0	0	0	0	0
NR_132381.1	0	0.500447	0	0	0.56495	0.141671	0.387014	0.112828	0.192695	0	0.444897	0.173898	0.28412	0	0
NR_133675.1	0.858685	1.68368	4.11497	0.178333	2.18514	2.28407	1.9633	0.626214	2.07183	0.358611	2.41608	0.241453	4.23999	0	0.843246
NR_133664.1	0.561242	1.24066	1.04775	0.491529	0.875316	1.10239	0.770689	1.00743	0.498676	0.924396	1.57803	0.897641	1.65358	0.788722	0.921543
NR_133911.1	0.890323	4.73528	3.22814	0.960844	1.63633	2.17744	0.172928	2.05883	0.389709	1.2505	1.99302	0.2318	1.00858	0.208385	4.35474
NR_133677.1	0	0	0.244709	0	0	0	0	0	0	0	0	0	0	0	0
NR_132748.1	0	0	0	0	0	0	0	0	0	0	0	0	0	0	0
NR_135071.1	0	0	0	0	0	0	0	0	0	0	0	0	0	0	0
NR_132999.1	0.842773	2.82177	4.19836	1.05029	1.70687	2.12714	0.478458	1.64847	0.83703	1.4359	3.47903	0.624242	2.5955	0.935712	2.58538
NR_133000.1	0	0	0.778224	0	0	0	0	0	2.87392	0	0	0	0	0.279712	0
NR_133682.1	0.19123	0.106676	0.148952	0.0687924	0.242964	0	0	0.144304	0	0.331039	0.142252	0.111205	0.363381	0	0
NR_109979.1	4.75347	0	0	5.64173	1.72032	8.68975	38.3175	20.6597	3.35151	0	0.000122434	3.09094	6.46435	2.7324	0
NR_073383.1	0.0642761	0.255522	0.387716	0.344441	0.324798	0.452288	0.212198	0.365481	0.099288	0.315262	0.51078	0.0111988	0.65398	0.142749	0.36562
NR_015446.1	0	0.049321	0	0.0267642	0	0.148867	0.0515312	0.184149	0	0	0.164527	0.0652439	0.469098	0.0214302	0.149247
NR_003571.1	1.19632	1.00707	0.850531	0.9105	0.860802	0.968849	1.26153	0.99172	0.814164	0.822036	1.21844	1.08671	0.639087	0.752217	0.860809
NR_137433.1	0.364582	0.233514	0.51019	0.232636	0.925272	0	0.831877	0.759025	0.706892	0.797253	0.783036	0.827598	1.3269	0.63633	1.23669
NR_137434.1	0.117794	0.492355	0	0.837947	0.000294826	0.223789	0	0	0	0	0	0	0	0	0
NR_033735.1	0	0	0	0	0	0	0	0	0	0	0	0	0	0	0
NR_137435.1	3.32326e-05	4.19776e-05	0	0	0	0	0.000103221	4.93378e-05	0.000139497	0	8.31953e-05	5.33222e-09	0	9.25289e-05	4.07481e-10
NR_137436.1	0.839151	0.332236	1.98341	0.0957626	0.196208	1.51797	0.117039	0.798038	0.339538	0	0	0.315555	1.71909	0.233897	0.686658
NR_137431.1	0	0	0	0	0	0	0	0	0	0	0	0	0	0	0
NR_137432.1	0	0	0	0	0	0	0	0	0	0	0	0	0	0	0
NR_137429.1	0.208326	0	0.748537	0	0	3.05707e-07	0	0.16766	0.12918	0	0	0	0	0	0
NR_137430.1	0	0	0	1.77761e-10	0.001165	0.769046	0	0	0	0	0	0	0	0	0
NR_034156.1	0	0	0	0	0	0	0	0	0	0	0	0	0	0	0
NR_137294.1	2250.87	11071.5	9828.71	407.788	15039.4	8530.86	192.232	2482.81	244.727	3201.21	7887.86	78.2466	41630.1	45.5361	24678.9
NR_137295.1	4768.66	43786	47236.1	903.67	39979.1	38779	699.974	10418.7	656.738	14311.1	39114.6	291.685	64092.7	161.786	47189.7
NR_104121.1	0	0	2.16715e-07	0	0	0	0.579136	3.25454	0	0	0	0	0	0	9.47586e-06
NR_137639.1	134.381	38.439	32.1696	73.4869	29.0592	30.9812	125.359	46.407	96.7918	55.6403	42.1736	73.1733	24.165	70.8122	34.9617
NR_135168.1	26.9384	22.7896	60.0699	10.5782	15.9139	29.0925	19.2562	51.0104	34.2187	24.5417	27.4593	13.8508	31.272	9.91671	27.9802
NR_125371.1	40.4313	15.8804	11.8104	31.7477	20.4092	17.0992	47.0386	22.7796	39.1177	18.9467	11.4483	30.8054	5.55793	25.572	13.814
NR_003655.3	0.556862	1.32464	1.22269	0.421059	0.564899	1.02658	0.288319	0.731405	0.518779	0.756971	1.09372	0.549816	1.05027	0.480242	1.12002
NR_138027.1	2.54804	2.12037	1.05094	3.24996	1.68906	1.08335	1.18622	2.85933	2.10738	3.51835	1.93077	2.6241	2.57154	4.24933	3.23539
NR_138024.1	2.28417	0	0	0	0	0.583964	1.08754	0	1.51197	0	0	0	0	0	0
NR_138025.1	0	0	0	0.205345	0	0	0.669876	0	0	0	0	0	0	0	0
NR_138026.1	1.88136e-07	0	0	0.427415	0	0	0	0.753492	1.90169e-08	1.10752	0	1.09758	3.94888	0.242163	0.646286
NR_138028.1	0	0	0	0.000764221	0	0	0	0.000413363	0	0.00853258	0	0.00521606	0.0231653	0.00110428	0.00146697
NR_138046.1	0.657538	6.26973	0.0115515	4.95421	9.23001	10.2535	2.04238	0.0121299	1.39698	6.89581	4.667	1.02649	3.79911	3.86233	2.83743
NR_138045.1	0	0	0	0	0	0	0	0	0	0	0	0	0	0	0
NR_138043.1	0	0	0	0.0386915	0.100947	0	0	0	0	0	0	0	0	0	0
NR_138049.1	0	0	4.60488	0	0	0	0	3.21497	0	0	3.80311	0	0	0	1.4142
NR_138042.1	0	0.0237996	0	0	0.0832254	0.0162183	0	0.0600911	0	0.0144172	0.295237	0	0.0643205	0	0
NR_138052.1	4.53224e-06	0.214957	2.51213	0	0.000112986	0.0105497	0.180427	0.000330947	0	0.00107273	0.329668	0.412458	0.0514154	1.63283e-07	1.70661
NR_138055.1	0.898173	1.10123	0.156316	0.71767	0.37117	0.0498237	0.000106985	6.1757e-07	0.372598	0.611726	0.91799	0.220692	3.02567e-10	0.203892	2.21836
NR_138029.1	0.244293	2.72737e-08	0.518424	0.00538118	0.865206	5.94006e-07	0	0.694795	0	0	1.05035	0	0.399956	0	0.0501692
NR_138070.1	2.15583	8.59271	14.7254	1.37152	9.75733	7.51274	1.32582	3.9118	2.46553	3.52542	13.6094	0.938623	6.14486	0.820478	8.58311
NR_138080.1	1.12811	0	0	0	0.26106	0	0.401355	0.763487	0.686815	0	0.408195	0.57322	0.556268	0.342864	0.348876
NR_138053.1	0.665027	2.1422	4.33185e-05	0.524965	1.16899	1.44842	0.26119	1.12904	0.607408	1.35883	2.08675	7.03593e-09	2.35266	0.351924	1.75528e-09
NR_003078.1	0	0	0	0	0	0	0	0	0	0	0	0	0	0	0
NR_002743.2	0	0	0	0	0	0	0	0	0	0	0	0	0	0	0
NR_135467.1	2.71941	5.09746	2.96807	2.54459	3.78896	5.05689	3.34348	1.93537	2.08122	3.08344	2.86355	3.25559	0.720447	1.93866	2.56141
NR_104472.1	7.4442	5.45503	2.94157	1.41575	4.92827	2.94828	6.18223	12.4638	8.89333	1.78988	4.73866	8.436	6.77635	1.82492	2.5788
NR_138083.1	0	0	0	0	0	0	0	0	0	0	0	0	0	0	0
NR_001538.2	0	0	0	0	0	0	0	0	0	0	0	0	0	0	0
NR_138096.1	0.0365368	0	0.0740449	0	0	0	0	0	0	0	0	0	0	0.0627121	0
NR_138081.1	1.80782	5.90601	5.20866	8.16623	4.68408	7.47457	4.01179	0	2.58824	2.8016	0.802384	3.49033	0	4.39611	0
NR_138136.1	0.0529231	0	2.24649e-09	0	0	0.444681	0.454027	0.057943	7.41575e-09	0	0	0	0	2.34044e-10	7.7805e-08
NR_134486.1	2.28269e-05	1.37326	0	8.34392e-09	1.33837	0	0	0	0	3.15423e-07	2.32383	0	0	3.95428	0
NR_134487.1	3.36329	1.82753	2.82415	5.60657	2.61365	1.73627	8.97818	10.4794	7.61841	6.53972	0	2.4406	3.93626	6.42981	5.77028
NR_138132.1	9.55958e-05	1.35741	2.00376	2.40043e-08	0.760621	2.14134	0.631936	0	0.234329	0.522132	1.54852	1.02375	1.06427	0.41935	0.638139
NR_138131.1	0	0.602475	0.760551	0	0	0.418634	0	0	0.138397	0	0	0	0.00272475	0	1.2356
NR_138133.1	0.463085	0	0	0.334828	0.711841	0.00516635	0.544614	0.763607	0.597711	0	0	0	2.19945	0.213243	0.167241
NR_138140.1	0	0	0.000291937	0	7.82473e-05	1.25606e-08	0	0.387318	0	4.11187e-05	1.30715	0	0.362676	2.24098e-06	0
NR_103739.1	0.513628	0.844813	1.1053	0.54354	0.701689	0.28247	0.231095	0.220521	0.23242	0.511504	0.736465	0.344439	1.01743	0.147879	0.775939
NR_033423.1	0	0	0	0	0	0	0	0	0	0	0	0	0	0	0
NR_138137.1	0.13153	0	7.04797e-10	0	0	0	0	0.133656	6.93042e-10	0	0	0	0	0	0
NR_138138.1	0.17363	0.299701	0.421718	0.687094	0.470017	0.615616	0	0.103725	0.49903	0.422461	0	0	0.113203	0.417635	1.09153
NR_138139.1	0.47204	0.80053	0.882326	0	0.362886	0	0	0.248849	0.300895	0.000128672	0	0.424632	0.12192	0.120232	2.48542e-05
NR_138146.1	0	0	3.3843	0	0	1.32921	0	0	0	0	0	0.353306	0	0	0
NR_138152.1	0	0	0	0	0	0	0	0	0	0	0	0	0	0	0
NR_138153.1	0	0	0	0	0	0	0	0	0	0	0	0	0	0	0
NR_138154.1	0	0	0	0	0	0	0	0	0	0	0	0	0	0	0
NR_138249.1	0	0	0	0	0	0	0	0	0	0	0	0	0	0	0
NR_138255.1	0.395317	0.00412444	0	0	0	0	0.486122	0	0	0.000362256	0.751965	0	0	0	1.82051e-09
NR_138256.1	0.0854157	0.00612344	1.94838	0	0	0	0	2.10993	0.829408	0.00037524	2.3561e-06	0	0	0	1.29033e-09
NR_138424.1	0	0	0	0	0	0.00452581	0	0	0	0.395944	0	0	0.0275559	0	0
NR_138425.1	0	0	0	0	0	0	0	0	0	0	0	0	0	0	0
NR_138422.1	0	0.252571	0.301018	0.11221	0	0.322361	0	0	0	0	0	0	0.646152	0	0
NR_138426.1	1.51743	1.67756	3.24293	2.13402	1.61924	2.7671	0.821315	1.2933	1.1956	1.45862	1.46116	2.51358	1.73479	1.65245	2.16051
NR_138423.1	0.413633	0.884571	3.11432	0.27651	0.425839	0.990225	0.324529	0.408702	0.0607545	0	1.08323	0.415884	1.59774	0.247052	1.25385
NR_138421.1	0.233651	0.183217	0	0	0.32183	0.461713	0.125447	0.548279	0.274916	0.809294	0.16819	0.174612	0	0	0.412166
NR_138427.1	0	0.0859376	0	0	0	0.0999883	0	0	0	0	0.169538	0.124203	0	0.21147	0.0755385
NR_110899.2	0	0	0	0	0	0	0	0	0	0	0	0	0	0	0
NR_110370.1	0.620865	2.05903	3.27079	0.206973	3.24546	1.8966	0.0989789	1.34414	0.614156	1.26172	3.15784	0.12211	2.72932	0.219184	3.35593
NM_207127.2	0	0	0	0	0	0	0	0	0	0	0	0	0	0	0
NM_207128.2	0	0	0	0	0	0	0	0	0	0	0	0	0	0	0
NR_109764.1	0	0	0	0	0	0	0	0	0	0	0	0	0	0	0
NR_138459.1	0.690402	0.684254	0.908771	0.42402	0.834736	1.33671	0.326239	0.198771	0.367897	0.888639	0.856364	0.849278	0.364305	0.0511613	0.778515
NR_109766.1	0.0900134	0.225959	0	0	0	0	0.0359439	0	0	0.116867	0.100439	0	0	0.115875	0
NR_109765.1	0	0	0.0735923	0.0909332	0	0.206445	0.182485	0.164415	0.456296	0	0	0.0633516	0	0	0
NR_138419.1	0	0	0	0	0	0	0	0	0.490795	0	0	0	0	0	0
NR_036575.1	0	0	0	0	0	0	0	0	0	0	0	0	0	0	0
NR_103475.1	0	2.23667	0	3.63388e-06	1.25916	1.0016	0.220176	0	0.418271	0.454058	0.267683	0.556484	0	0.261828	0.62173
NR_036461.1	9.38313	33.6881	35.6587	15.0341	10.4349	23.066	17.3302	5.62195	27.055	5.85289	29.6319	12.535	11.4854	8.33007	15.0206
NR_027337.1	0	0	0	0	0	0	0	0	0	0	0	0	0	0.205126	0
NR_045125.1	0	0	0	0	0	0	0	0	0	0	0	0	0	0	0
NR_110315.1	5.57333e-07	0	0	0.0317941	0.0887995	0.184938	0.0307542	0.0959504	0.0161492	0.0330921	0.173675	0.0292649	0	0	0
NR_104261.1	0	0	0	0	0	0	0	0.178425	0	0.0451064	0.0696319	0	0	0	0
NR_138468.1	0	0	0	0	0	0	0	0	0	0	0	0	0	0	0
NR_133673.1	0	0.885737	0	0	0	0	0	1.41722	0.184552	0	0	1.03982	0	0	1.11516
NR_138467.1	0	0	0	0	0	0	0	0	0	0	0	0	0	0	0
NR_033193.1	4.17674	3.42534	4.65719	5.70907	1.47042	2.19468	3.17743	0.830073	1.96254	2.65954	2.29689	0.75184	3.31539	1.48139	6.49537
NR_033195.1	0	3.56464	8.2108e-06	4.06287	4.79458	2.5533	7.88544	4.13921	0.946266	5.77933	6.5899	5.76986	2.67641	6.39552	1.94258
NM_001162491.1	0.0356596	0	0.0287471	0	0.555794	0	0	0	0	0	0	0.124422	0	0	0
NM_024114.3	0	0	0	0	0	0	0	0	0	0	0	0	0	0	0
NR_024581.1	0.0306375	1.73322	5.84774	0	6.5638	2.85534	1.16555	14.1732	2.90099e-08	6.18397e-06	7.6344	1.12422e-07	1.74186e-06	0	5.65404
NR_037675.1	3.54458	4.45948	7.94286	2.83855	3.01895	3.41249	3.31333	8.94192	4.28782	3.54993	6.99533	3.97892	7.49326	2.53841	5.52543
NR_023319.1	3.20736	8.76863	12.6623	0.0514769	6.31599	0.383311	2.92055	9.79254	2.23319	13.4978	1.16648e-06	2.56638	0	0.334932	12.145
NR_037164.1	0.916066	2.13106	1.86203	0.559181	2.76	3.76981	0	1.24529	0	0.366848	3.22105	0.689468	3.13118	0.627536	1.96726
NR_023361.1	1.44796	6.5495	3.0186	4.77318	0.434153	7.60757	2.03198	1.86103	2.31278	0.555606	3.03158	1.64364	4.4186	2.3735	2.00106
NR_026895.1	1.79679	0	1.18967e-06	2.49089	0	0.533416	1.58343	4.66551	0.573426	2.2518	0	0.91067	0	1.66209	2.43315
NR_030722.1	0.173503	1.22417	4.32735	2.08594	0	0.39841	1.28505e-06	0.823136	0.0577304	0	0.546475	0.00229487	0	0	0
NR_027450.1	0.098006	0	0	0	0.240507	0	0	0	0	0	0	0	0	0	0
NR_003494.1	0	0.568474	1.00344e-05	0.496508	4.16687e-09	0	0	0	1.47394	0.196639	0.119842	1.62038	0.00853512	0.91187	0.000162419
NR_033344.1	0.205136	1.21204	1.36638e-09	0	0.262186	0.609472	0.616377	0.462548	0.150035	0	0.361175	3.19479e-06	0	0.866442	0
NR_024188.2	5.73119e-09	1.44996	2.09579	0.233983	2.48657	0	0	2.63067e-08	0.353942	1.85524	0	0.930097	3.26527e-07	1.08969	1.89503
NR_024546.1	0	1.82519	0.490818	0.864609	0	0	1.41133	0	0.236397	0	1.09988	0	2.28202	0.885803	0
NR_023318.1	2.37946	3.21751	2.76304	2.59839	2.59669	5.97231	1.242	2.83028	2.21736	3.76643	7.0882	1.13547	2.65458	1.53834	2.99595
NR_002158.1	0	0	0	0	0	0	0	0	0	0	0	0	0	0	0
NR_002942.1	0	0	0	0	0	0	0	0	0	0	0	0	0	0	0
NR_024523.1	0	0.133301	0.0267716	0.0286808	0	0.13438	0.024896	0.0580362	0.0503651	0.0167069	0.0290456	0.0576603	0.076779	0	0.0825962
NR_024524.1	0	0	0	0	0	0	0	0	0	0	0.0265158	0	0	0	0
NR_002165.1	1.04415	1.20904	2.07707	0.524691	0.949385	1.76637	0.886422	0.597791	0.890546	0.478379	1.13067	0.577139	0.189906	0.0787817	2.71344
NR_022014.1	0.0825196	0	0	0.133959	0.029664	0.204351	0.119063	0.023944	0.119452	0.0537732	0	0.0902326	0.184532	0.0353108	0.0516172
NR_002145.1	0	0	0	0	0	0	0	0	0	0	0	0	0	0	0
NR_026541.1	0.277624	1.56288	1.84207	0.653137	1.54405	1.25852	0.217372	0.325496	0.318253	1.11576	1.98847	1.01759	1.43847	0.639156	1.58901
NR_027486.1	0	0	0	0	0	0	0	0	0	0	0.0521643	0	0	0	0
NR_027408.1	0	0	0	0	0	0	0	0	0	0	0	0	0	0	0.0704912
NR_002169.1	0	0.217395	0.0877529	0	0	0.0615422	0.04203	0	0.125561	0	0	0	0.123422	0.037161	0.431195
NR_003024.1	0	0.14624	0	0.140901	0	0	0	0.0986206	0.0842306	0	0	0	0	0.0747395	0.0543773
NR_002157.1	0	0	0	0	0	0	0	0	0	0	0	0	0	0	0
NR_002140.1	0.0642535	0	0.570627	0	0.0528554	0	0	0	0	0	0.316348	0	0	0	0
NR_026540.1	0.176805	0.184415	0.0562708	0.0294889	0	0.113413	0	0	0	0.0429066	0.0589036	0	0	0	0.0567892
NR_033769.1	0.0238921	0.430094	0.145092	0.0252018	0.204043	0	0.0462038	0.184197	0.0222375	0	0	0	0.608919	0	0.114904
NR_026564.1	0.108069	0.358155	0.73095	0	0.181899	0.192223	0.152605	0.432101	0.174554	0.490015	0.162341	0.0474505	0.302106	0.0890885	0.514876
NR_138475.1	0.814568	0.0439975	3.65493	9.78293e-09	2.01639e-10	2.90026	2.46253e-10	2.2412	0.0176615	1.54942	2.39772	0.690347	2.46422	0.000177981	3.17957
NR_104470.2	0	7.25556e-09	0	0	0	8.79594e-08	1.08287e-09	0	0	0	0.000660396	0	0.0186589	0.044102	3.76164e-11
NR_110171.1	3.14954	3.64269	4.66173	1.07138	2.54334	1.75958	1.53925	2.75206	1.57588	2.10474	1.7503	1.48234	3.04116	1.77903	3.627
NR_046335.1	0	0	1.59994e-05	1.6581e-08	0	1.51556	0	0.00646873	1.86712e-05	4.08883e-06	0	0.00251072	0.000606186	0.000622378	0
NR_046336.1	0.163777	1.70643	2.65996	0.470152	0.546456	0.345685	0.0821402	0.594075	0.442444	0.271308	3.06239	0.253422	1.16933	0.202128	1.71188
NR_046327.1	0	0	0	0	0	0	0	0	0	0	0	0	0	0	0
NR_024016.2	0	0	0	0	0	0	0	0	0	0	0	0	0	0	0
NR_033761.1	0	0	0	0	0.24375	0	0	0	0	0	0.263151	0	0	0	0
NR_104022.1	6.23275	0	4.3879	0	0.000158694	0	0.170755	38.1713	2.99051	0.552786	0.00199815	0.154956	1.20845	0	4.82766
NR_110290.1	0	0	0	0	0	0	0	0	0	0	0	0	0	0	0
NR_072989.1	0.142535	0.237156	0.0717562	0.158006	0.193545	0.21983	0.0867604	0	0.117983	0.171476	0.145382	0	0.204655	0.0493025	0.0725276
NR_046051.1	0	0	0	0	0	0	0	0	0	0	0	0	0	0	0.516123
NR_109913.1	0	1.67822	0	2.01795e-10	0	1.25179	0	0	0	0	0	0	2.10025e-08	0	0
NR_047665.1	2.88606	7.77768	8.67686	9.91008	6.94991	9.14729	4.87084	4.92754	6.28628	7.4573	7.73402	5.40778	7.28965	5.91038	5.23802
NR_046052.1	3.19338	1.66994	2.24979	0	0.528741	1.13082	0.00171837	4.99105	0.987065	0	1.34347	0	0.382539	0	1.32258
NR_047666.1	3.10069e-05	0	0.00375667	0	9.42629e-09	2.20736e-05	0	1.71506	0	4.71383e-08	1.05057	8.24333e-10	0.00021016	1.38406	0
NR_073153.1	0	0	0	0	0	0	0	0	0	0	0	0	0	0	0
NR_051978.1	0	4.73114	1.92049	5.40832	0.939534	5.75104	0.26542	1.16298e-05	1.17377	0.0272946	1.91207	4.19489	7.54547e-06	2.10712	2.01041
NR_104627.1	0.152704	0.515366	1.1952	0.0255459	0.0297405	0.028484	0.0146686	0	9.39411e-06	0.596526	1.16292	0.611901	0.000173964	0.0811827	0.00135658
NR_049739.1	0	0	0	0	0.613817	1.43869	0	0	0.190951	0	0	0.155501	0.590385	0	0.75808
NR_037628.1	0	0	0	0	0.709065	1.93101	0	0.216922	0	0	0.379478	0.135706	0	0	0.395042
NR_073152.1	0	0	0	0	0	0	0	0	0	0	0	0	0	0	0
NR_073052.1	0	0	0	0.305461	1.48152	2.53632	0	1.10285	1.52537	2.03597	0.718228	0	0	0.084779	9.97419e-07
NR_073047.1	7.46341	0	3.60238	2.73676	2.5917	5.03083	2.35362	4.17165	4.89969	0.00475912	2.50988	4.64676	3.17587	2.21496	0.000178863
NR_104023.1	0.673186	2.54649	3.06962	0	0.462541	1.67121	0.0816584	0.761999	0.244009	0.655515	1.83346	0.0734174	2.15868	0.0529384	3.87559
NR_103708.1	0	0	0.332588	0	0	0	0	0	0	0	0.196123	0	0	0	0.218787
NR_073049.1	0.0020239	1.33245e-08	0	0	0	0.657315	1.92259e-05	0	0	0	0	0.000328621	0	0	0
NR_110172.1	0.622472	3.92289	2.54335	3.35597	2.00164	3.79041	1.72899	0.802996	2.80088	0.758087	3.16275	1.64751	1.52988	2.24326	1.8495
NR_049738.1	9.27354e-05	7.7109	7.39317	6.51229	0	1.7911	1.26574	1.5858	4.48226	4.62332	5.79377	3.10377	4.88217	4.47809	3.91132
NR_110173.1	0.584721	0	1.13328	1.88296	1.69512	1.49388	0	0	0.926468	0.78383	0	1.89445	0	0.799559	1.02591
NR_073403.1	3.09999	2.80211	2.52218	6.44188	2.33774	2.8457	7.93641	3.08859	8.24306	2.31023	4.93884	2.24473	5.49967	2.65923	3.12522
NR_103512.1	0.593519	1.17479	0	0.429712	0.128918	0.457502	0.872124	1.5281	0.556611	0.2457	0.703344	0.611243	0.784474	0.190022	0.715955
NR_102390.1	0	0	0	0	0	0	0	0	0	0	0	0	0	0	0
NR_052026.1	0	0	0	0	0	0	0	0	0	0	0	0	0	0	0
NR_103709.1	0	0	0	0	0	0	0	0	0	0	0	0	0.136561	0	0
NR_104448.1	0	0	0	0	0	0	0	0	0	0	0	0	0	0	0
NR_046329.1	0	0	0	0	0	0	0	0	0	0	0	0	0	0	0
NR_037860.1	0	3.93708	4.87644	0	3.37406	1.14573e-07	0	0	0	4.03145	5.9093	0	0	0	0
NR_003921.1	0	0	0	0	0	0	0	0	0	0	0	0	0	0	0
NR_034169.1	0	0	0.476942	0	0.585757	0	0	1.43561	0.148677	0.332766	0.450306	0.1683	1.01109	0.126562	0.482689
NR_024593.1	0.0883309	0.210256	0.482726	0.046123	0.322039	0.194929	0.0729139	0.318639	0.0822447	0.210812	0.55889	0.0839851	0.293213	0.0433593	0.4547
NR_036476.1	0	1.28641	0	0.36039	1.14464	3.43592	0.353582	0.723104	0	1.098	2.38984	0.075236	3.56512	0	0.371096
NR_046417.1	0	0	0	0	0	0.0238503	0	0.0190591	0.0358706	0.0221017	0.0752152	0	0.0965095	0	0.214588
NR_024254.1	1.03286	0.664997	1.2383	0.670228	0.818874	0.517856	0.913146	0.720013	0.910726	0.709754	0.862633	0.789387	1.22247	0.43626	1.14773
NR_033866.1	0	0	0	0	0	0	0	0	0	0.264151	0	0	0	0	0.253253
NR_002185.3	0	0.051999	0	0	0	0	0	0.0703408	0	0	0	0	0.0885645	0	0.0386767
NR_024252.1	0.395376	0.439363	0.593103	0.0807131	0.361677	0.542462	0.236678	0.479879	0.304528	0.242774	0.90908	0.155656	0.604144	0.0968342	0.66823
NR_003143.2	0	0	0	0	0	0	0	0.0359027	0	0	0	0	0	0	0.0394821
NR_024363.1	2.24165	2.15668	3.04272	0.658179	2.11783	0.979634	0.958711	1.37225	0.797344	0.823095	1.71693	0.675887	0.792977	0.57688	2.56211
NR_024178.1	0.0137813	0.0923933	0	0	0.0195235	0.0227213	0	0	0	0.018934	0	0.0360545	0	0	0
NR_024604.1	0	0	0	0	0.0135203	0	0	0	0	0	0	0	0	0	0
NR_024376.1	0	3.52493e-05	0	0	0	0	4.30101e-06	0	0	0	0	0	0	0	0
NR_027141.2	0.0416614	0	0	0.131964	0.332177	0.233533	0.0947492	0.0534587	0.131156	0	0	0.0995252	0	0.0439456	0
NR_026868.1	8.28647	6.41252	6.33322	4.99245	6.25827	7.55962	5.81584	10.3927	7.26744	6.32233	9.3247	3.71705	4.64516	3.5048	6.46095
NR_002794.1	0	0	0	0	0	0	0	0	0	0	0	0	0	0	0
NR_045208.1	0	0	0	0	0	0	0	0	0	0	0	0	0	0	0
NR_024591.1	0.0585987	0	0.0223375	0.0141112	0.121602	0.100606	0.0145555	0	0.053645	0.0813452	0.0800487	0	0	0.0368716	0.103372
NR_038424.1	0	0	0	0	0	0	0	0	0	0	0	0	0	0	0
NR_024074.1	0	0.0339095	0.0500857	0	0	0.16566	0	0.151897	0	0.0259536	0.0442142	0	0	0	0.141361
NR_024241.1	3.10576	6.57571	4.70101	2.89047	3.73148	6.20863	2.20329	2.06849	2.52195	3.28418	4.07501	5.26813	4.18912	3.16774	3.53922
NR_038409.1	0.0262931	0.281513	0.0416777	0	0.117141	0.0621033	0	0.0822752	0.0530222	0.0623134	0.127095	0.0119625	0	0	0.169877
NR_026822.1	0.0136828	0.0680185	0.150421	0	0	0.215188	0.0450067	0	0.0321787	0.032043	0	0	0.15309	0	0.135422
NR_104046.1	0	0	0	0	0	0	0	0	0	0	0	0	0	0	0
NR_026818.1	0.0136828	0.0680185	0.150421	0	0	0.215188	0.0450067	0	0.0321787	0.032043	0	0	0.15309	0	0.135422
NR_026819.1	0	0	0.448989	0	0	0	0.0450067	0	0.0321787	0	0	0	0.15309	0	0
NR_024251.1	1.49074	3.97397	0.343919	1.35959	1.41606	4.19654	0.917946	0	1.38281	1.18056	2.16972	2.06435	2.71187	1.46882	1.88647
NR_002161.1	0	0	0	0	0	0	0	0	0	0	0	0	0	0	0
NR_026592.2	1.42645	8.49536	6.28296	2.43777	3.44934	6.52702	1.80003	1.68819	2.38577	1.93318	6.45001	1.13827	4.73544	1.75413	3.83356
NR_104045.1	0	0	0	0	0	0	0	0	0	0	0	0	0	0	0
NR_073407.1	0	0	0	0	0	0	0	0	0	0	0	0	0	0	0
NR_073408.1	0	0	0	0	0	0	0	0	0	0	0	0	0	0	0
NR_003268.3	0.0115286	0	0	0	0.0503392	0.0324282	0.0330118	0.0129178	0.0222661	0.12697	0.0801933	0.01994	0	0.019663	0.129446
NR_036478.1	0	1.85836	3.01946	0.507186	1.07049	0.7366	0	1.40031	0	1.23846	0.909908	0.76513	1.31894	0	2.38311
NR_003669.2	0	0	0	0	0	0	0	0	0	0	0	0	0	0	0
NR_003950.1	0.0305039	0.054396	0.333297	0.0731294	0	0.145634	0.0141441	0.0693144	0.0499937	0.099681	0.179535	0.03752	0.352525	0.0454552	0.142668
NR_027407.1	0	0	0	0	0	0	0	6.79505e-11	0	0	0	0	0	0	0.0395132
NR_036477.1	1.41499	0.883028	4.68359	5.94804e-05	0.943864	0.0008365	0.000895003	0.979042	0.662197	0	1.08068	0.244458	1.16866e-06	0.193614	1.83843
NR_003366.2	0	0	0	0	0	0.0128481	0	0	0	0	0	0	0	0	0
NR_027320.1	0	0	0	0	0.0296609	0	0	0	0	0	0	0	0	0.0539149	0
NR_024250.1	0	0	2.34428	0	1.09492	0.243157	0.236586	1.32423	0.301427	0.142683	0.0069367	0	0	0.000875526	0.476373
NR_024361.1	4.43629	8.63967	11.9008	3.55704	5.73812	6.99918	0.895435	5.8707	2.70118	7.8664	10.1882	4.9031	3.96036	1.16322	8.45071
NR_027781.1	0	0	0.781745	0.416299	0	0	0	0	0.372851	0	0	0.672961	0	0	0
NR_002711.3	0.0223169	0	0	0	0	0	0	0	0	0	0.0484458	0	0	0	0
NR_024362.1	2.00307	4.7935	4.89951	0.456263	3.61342	7.10333	1.57332	3.50007	1.7108	1.23181	6.67192	0.485724	8.56717	0.78817	4.38401
NM_001122646.2	0	0	0	0	0	0	0	0	0	0	0	0	0	0	0
NM_001318811.1	0	0	0	0	0	0	0	0	0	0.0196381	0.0337825	0	0	0	0
NM_001005327.2	0	0	0	0	0	0	0	0	0	0	0	0	0	0	0
NM_001242757.1	0	0	0	0	0	0	0	0	0	0	0	0.0331977	0	0	0
NM_001172667.1	0	0	0	0	0	0	0	0	0	0	0	0	0	0	0
NR_135199.1	0.0281974	0	0	0	0	0	0.0343243	0	0	0	0	0	0	0	0
NR_135484.1	0	0	0	0	0	0	0	0	0	0	0.450802	0	3.96956e-09	0	0
NR_135916.1	0.0674266	0.126886	0.182033	0.00905862	0.155394	0.13279	0.0580371	0	0.0570488	0.0503304	0.125787	0	0.0241279	0.00732037	0.0715435
NR_131769.1	0.0931575	0.0958372	0	0	0	0	0	0	0	0	0	0	0	0	0.11364
NR_033338.1	2.80566	9.83013	2.62899	1.76337	3.84901	4.55186	0.00396917	1.0783	1.03334	1.9927	3.74802	6.39667	0.00165022	0.00102148	3.29544
NR_136579.1	0	0.0189664	0	0	0	0	0	0	0.0125105	0	0	0	0	0	0
NR_130165.1	0	0	0	0	0	0	0	0	0	0	0	0	0	0	0
NR_135747.1	0	0	0	0	0	0	0	0	0	0	0	0	0	0	0
NR_073428.1	0.451371	3.96948	4.49818	1.19572	0.931736	0.499246	0.870831	0.457754	0.853374	0.162616	2.57475	0.270779	1.34756	0	2.28105
NR_028075.2	0.113592	5.00643e-05	0.176838	0.157039	0.0804757	0.436846	0.0551291	0	0	0.29496	0.380709	0.111301	0	0	5.88476e-06
NR_136210.1	0	0	0	0	0.0467938	0	0	0	0	0	0	0	0	0	0
NR_026782.2	0	0	0	0	0	0	0	0	0	0	0	0	0	0	0
NR_135618.1	0	0	0	0	0	0	0	0	0	0	0	0	0	0	0
NR_135270.1	0.804472	0.977919	1.01197	0.228425	0	0	0	0.51881	0	0	0.868453	0	0	0	0.257419
NR_104115.1	0	0	0	0.0301464	0	0.0722483	0	0	0	0	0	0	0	0	0
NR_037792.1	1.81139	1.64118	2.22614	1.41017	2.42735	1.12264	1.08429	0.618067	2.29186	2.49858	1.4308	1.1875	3.5246	2.74108	1.23511
NR_134874.1	0	0	0	0	0	0	0	0	0	0	0	0	0	0	0
NR_136580.1	0	0	0	0	0	0	0	0	0	0	0	0	0	0	0
NR_135229.1	112.955	77.7624	101.169	123.006	95.1923	80.9247	138.383	107.816	134.213	103.675	94.0626	144.445	83.0371	134.379	102.307
NR_135795.1	0	0	0	0	0	0	0	0	0	0	0	0	0	0	0
NR_131761.1	0	0	0	0	0	0	0	0	0	0	0	0	0	0	0
NR_135483.1	0	0.171955	0	0.826214	0.00329203	1.33436	0	0	0	0	0.802009	0	0.579629	0	0.431107
NR_135043.1	0	0	5.42375e-07	0	0	0	0	0	0	0	0	0.000499928	0	0	1.82267e-10
NR_111984.1	0	0	0	0	0	0	0	0	0	0	0	0	0	0	0
NR_027459.2	0	0	0	0	0	0	0	0	0	0	0	0	0	0	0
NR_135796.1	0	0	0	0	0	0	0	0	0	0	0	0	0	0	0
NR_135232.1	0	0	0.522976	0.467881	0	0	0.438978	0.167414	0	0.168671	0.798507	0.90142	0	0.522082	0.154133
NR_135067.1	0.445122	0	1.38523e-09	0	4.05035e-07	0.890167	0.314016	0.730586	0	0.630237	0	0.798712	0	0	0
NR_073051.1	0.000792722	0.374297	0	0.193337	0	0	0.409335	0	0	0	0	0.000190662	0.723277	0.000202368	0.0181615
NR_033265.1	0.597354	2.50501	4.74791e-09	9.65854e-10	0.054852	1.95617e-05	0.00274969	1.32678e-08	4.94261e-05	3.99866e-05	0.00033545	1.64497e-05	3.9069e-09	4.78612e-06	1.33066e-05
NR_131762.1	0	0	0	0	0	0	0	0	0	0	0	0	0	0	0
NR_110866.1	0.0680718	0	0.176329	0.0877639	0.279529	0.146413	0	0	0	0	0.178037	0	0	0	0.129121
NR_104583.1	0.0787221	0	0	0	0	0	0	0	0	0.0782421	0	0	0	0	0
NR_104408.1	0	1.23558	1.64679	0.989958	0.31006	0.529429	0.718726	0	0.442159	0.0871678	0.688917	0.640467	0.288113	0.0871614	0.928734
NR_135617.1	0	0	0	0	0	0	0	0	0	0	0	0	0	0	0
NR_126051.1	0	0	3.19583	0	0.433559	0	0	0.0301591	0.231495	0	3.26182e-09	0.158679	0	0	0
NR_135503.1	0.00520239	0.0104272	2.47612	0	0	3.58164e-09	0	0.277199	0.316615	0.40882	0	0	0	0	0.000216365
NR_037715.1	8.54055	11.2653	11.8667	13.8147	11.4853	12.5468	9.63816	9.13558	11.3093	11.0179	7.08134	11.1411	8.63256	12.0104	14.2731
NR_033234.1	0	0	0	0	0	0	0	0	0	0	0	0	0	0	0
NR_131772.1	0.299489	0	0	0.434363	0.335518	0	0	0	0.301041	0.239988	0	0	0	0	0
NR_110752.1	0	0	0	0	0	0	0	0	0	0	0	0	0	0	0
NR_110865.1	0	0	0	0	0	0	0	0	0	0	0	0	0	0	0
NR_104150.1	0	0.0823682	0	0	0	0	0	0	0	0	0	0.0631243	0	0.0858518	0.135672
NR_102364.2	0	0	0	0	0	0	0	0	0	0	0	0	0	0	0
NR_046266.1	0	0	0	0	0	0	0	0	0	0	0	0	0	0	0
NR_135797.1	0	0	0	0	0	0	0	0	0	0	0	0	0	0	0
NR_135745.1	0	0.543433	0	0	0	0	0	0	0	0	0	0	0	0	0
NR_027480.1	0	0	0	0	0	0	0	0	0	0	0	0	0	0	0
NR_136213.1	0	0	0	0.0191195	0	0	0	0	0	0	0.0131706	0	0	0	0
NR_135502.1	0.161765	0.42048	7.57857e-05	0	0	0.337136	0.588189	0.640347	0.00163143	0.259719	0	0	2.22508e-06	0	0.0728444
NR_131779.1	0	0	0	0	0	0	0	0	0	0	0	0	0	0	0
NR_109867.1	0	0	0	0	0	0	0	0	0	0	0	0	0	0	0
NR_126440.1	0	0	0	0	0	0	0	0	0	0	0	0	0	0	0
NR_037793.1	0.861194	1.66561	0	0.203473	0	0.681417	1.6106	1.06738	0	0	0	0	0	0	0.344334
NR_102409.1	0	2.11186e-08	0	0	0	0	0	0	0	0	0	0	0	0	0.288611
NR_073132.1	0	0	0	0	0	0	0	0	0	0	0	0	0	0	0
NR_130117.1	7.52253e-09	2.19037	2.19591e-06	1.75691	2.13138	0.680543	0.801033	1.43983	2.24643e-07	0.616854	1.91391	0	5.32332e-10	0.439232	1.18545
NR_102363.2	0	0	0	0	0	0	0	0	0	0	0	0	0	0	0
NR_135504.1	0.650627	0.000253761	0	0	0	0.572864	0.00659162	0.297043	0.147515	0	2.53116	0	0.196601	0.260597	1.37552
NR_135746.1	0	0	0	0	0	0	0	0	0	0	0	0	0	0	0.258572
NR_133924.1	0.244506	1.01009e-07	0	1.01064	1.02354e-09	0.597918	0.312101	1.10157	1.13212	0.505946	1.14649e-05	3.78338e-05	0.529275	2.49367e-07	0.443564
NR_135794.1	0	0	0	0	0	0	0	0	0	0	0	0	0	0	0
NR_103997.1	0.0727552	0.235896	0.415351	0	0.202724	0.27512	0.107681	0.0417573	0	0.216514	0	0.0607735	0.22453	0.0227238	0
NR_135798.1	0	0	0	0	0	0	0	0	0	0	0	0	0	0	0
NR_027694.1	0	0.116947	0.112358	0	0.033191	0	0	0.0263405	0	0.0619528	0.154004	0	0.306771	0	0
NR_111931.1	0	0	0	0	0	0	0	0	0	0	0	0	0	0	0.00983365
NR_135641.1	3.61151	0	7.17369	3.6781	5.77838	2.54524	3.84957	0.628012	3.09537	3.65031	0	0.790012	3.50156	2.69318	4.17704
NR_073046.1	1.76101e-09	1.2146e-08	0.463583	0	0	0.0139034	0	0	0	0	0	0	0	0	0
NR_135191.1	2.66214e-06	3.15182e-09	0.000609633	2.32339e-06	4.5772e-07	1.26874e-05	2.21211e-05	0	5.81723e-08	0	2.27593e-06	7.69111e-07	8.16094e-07	0.000135591	8.08901e-09
NR_136622.1	0.000161087	0.000291006	0.000911775	1.53937e-05	1.13679	7.06773e-07	0.00151263	0	2.6585e-06	0.735434	3.5392e-06	1.04777	1.18206	0.601698	1.16961
NR_033151.1	0	0	0	0	0	0	0	0	0	0	0	0	0	0	0
NR_134900.1	0	0	0	0.14814	0	1.54161e-10	0	0	0	0	0	0	0.171541	0	0
NR_104220.1	0.0171538	0.0381797	0.330288	0.041625	0.337927	0.128811	0.17213	0.237481	0.214027	0.253953	0.71357	0	7.6026e-10	0.0766341	0.113464
NR_111929.1	0.130352	0.107002	0.127131	0	0	0.44658	0.0651785	0.418089	0.136676	0.0848276	0	0.111328	0.704097	0	0
NR_073151.1	0	0	0	0	0	0	0	0	0	0	0	0	0	0	0
NR_110314.1	0	0	0	0	0	0	0	0	0	0	0	0	0	0	0
NR_130711.1	0	0	0	0	0	0	0	0	0	0	0	0	0	0	0
NR_104295.1	0.156639	4.25495	0.855799	0.690714	0.663785	1.29332	0.313587	1.40588	0	0.626745	1.69021	0.440418	0.84394	1.07792	0.996014
NR_027149.1	0	0	0	0	0	0	0	0	0	0	0	0	0	0	0
NR_136216.1	0	0	0	0	0	0	0	0	0	0	0	0	0.18267	0	0
NR_027410.1	0	0	0	0	0	0	0	0	0	0	0	0	0	0	0
NR_027711.1	0	0	0	0	0	0	0	0	0	0	0	0	0	0	0
NR_073432.1	3.50683	5.8925	9.38046	4.09646	4.04014	2.68662	3.59026	5.72937	4.51226	5.93217	5.3145	6.08512	5.7085	4.57462	7.2458
NR_026952.1	0.079322	0.459551	0.978817	0.0989539	0.185076	0.445941	0.0637279	0.0736482	0.0126334	0.254269	0.320765	0.125499	0.296899	0.0673079	0.38993
NR_027293.2	5.65239	8.80295	6.01116	6.37503	7.34402	6.10193	5.1261	3.53426	4.47497	5.17396	7.50216	9.24449	8.13458	7.07873	4.75118
NR_003246.4	0.172509	0.065802	0.79942	0.0588431	0.0605954	0.132364	0.155611	0.172588	0.115784	0	0.1067	0.0244456	0	0	0.819982
NR_077058.1	0.0639406	0.23003	0.111694	0.10888	0.137258	0.370501	0.0140462	0.00747621	0.0342781	0.0754898	0.349774	0.113279	0.172183	0.0325048	0.136662
NR_073430.1	0.114556	0.0549538	0.0289171	0.0268183	0.0178629	0.03594	0.0180759	0.0495268	0.0136991	0.0502848	0.0140956	0.00615943	0	0.00531931	0.0163761
NR_033770.1	0.0758735	0.0570443	0	0	0.186221	0	0.172302	0.0252282	0	0	0.950009	0.0603053	0	0.0274988	0
NR_027688.2	0.0977229	0.0427688	0.499847	0.0736988	0.220097	0.0301779	0.233832	0.148056	0.102469	0.127409	0.357937	0.188904	0.0582349	0	0.295103
NR_045005.1	0	0	0	0	0	0	0	0	0	0	0	0	0	0	0
NR_021485.2	0.0088266	0.0569801	0.124514	0	0.0128373	0	0	0.00978481	0	0.0225319	0.0194295	0.00769423	0.049231	0	0
NR_045677.1	0	0	0	0	0	0	0	0	0	0	0	0	0	0	0
NR_046351.1	0	0	0	0	0	0	0	0	0	0	0	0	0	0	0
NR_135203.1	0.220242	0.664449	0.686438	0.336275	0.582188	0.680112	0.0233806	0.283603	0.211547	0.220837	0.502956	0.197055	1.08112	0.149685	0.740402
NR_033742.1	0	0	0.0417788	0	0	0.0304582	0	0.0240707	0	0.0567793	0	0	0.0742771	0.0553949	0.0533871
NR_027754.2	0.246687	0.29892	0.602338	0.0728504	0.135489	0.176005	0.112618	0.344204	0.184139	0.232289	0.591496	0.0529586	0.212878	0.0306045	0.349517
NR_046005.1	0	0	0	0	0	0	0	0	0	0	0	0	0	0	0
NR_027291.1	0.431658	0.144885	0.0493417	0.188644	0.207517	0.190015	0.123072	0.3997	0.124439	0.113224	0.310404	0.100667	0.0668095	0.0907227	0.60469
NR_028347.1	0	0.110633	0	0	0	0	0	0	0	0	0	0	0	0	0
NR_045004.1	0	0	0	0	0	0.116463	0	0	0	0	0	0	0	0	0.0509999
NR_103714.2	0.0705863	0.177832	0.0222185	0.215456	0	0	0	0	0	0	0.143544	0.0377422	0.198402	0.117214	0
NR_027898.1	0.0238452	0.0567044	0.0624353	0.0145284	0.0337281	0.0526366	0.00658632	0.030743	0.0164332	0.0402966	0.0302894	0.0029364	0.154894	0.0115228	0.0883044
NR_024438.2	3.95985	3.76836	2.38872	6.39831	4.3101	3.10393	2.83507	7.74612	5.52738	5.76569	2.90531	5.15351	1.96528	4.81614	4.6245
NR_026823.2	0	0.414924	0	0	0.123306	0.302344	0	0.145893	0	0.083279	0	0.0628813	0.439831	0	0
NR_033753.2	0.00946528	0.102214	0.298943	0	0	0.0410262	0.00900771	0.0237348	0.073808	0.0120727	0.0618388	0.0157944	0.0363492	0	0.118259
NR_046354.1	0	0	0.245208	0.203965	0.126997	0.555992	0	0	0	0	0.463053	0.222961	0	0.177601	0.108955
NR_029395.1	0	0	0	0	0	0	0	0	0	0	0	0	0	0	0
NR_002171.2	0	0	0	0	0	0	0	0	0	0	0	0.0110353	0	0	0.0787371
NR_029386.1	0	0	0	0	0	0	0	0	0	0	0	0	0	0	0
NR_003658.2	0.14561	0	0	0.157143	0	0	0	0	0	0	0	0	0	0	0
NR_026980.2	0	0	0	0	0	0	0	0	0	0	0	0	0	0	0
NR_027401.2	0.215249	0.540337	0.145407	0.077433	0.304991	0.560866	0	0.60911	0.173379	0.838392	1.68126	0.156466	0	0.061576	0.446557
NR_028067.1	0	0	0	0	0	0	0	0	0	0	0	0	0	0	0
NR_104294.1	0	0	0	0	0	0	0	0	0	0	0	0	0	0	0
NR_108107.1	0	0.232289	0.103741	0	0.0119302	0	0	0.0453781	0	0	0.0915547	0.0534243	0.078665	0	0.12576
NR_027466.1	0	0.0717373	0.312098	0.0788931	0.138006	0.390033	0	0.138506	0.0312781	0.130318	0.21536	0.038759	0.0825232	0.0931907	0.10378
NR_040114.1	0	0	0	0	0	0	0	0	0	0	0	0	0	0	0.0700283
NR_047651.1	0.6267	3.14548	3.07602	0.270754	2.61277	1.56891	0.304398	1.61867	0.30312	1.61235	2.99307	0.448624	1.28718	0.164822	2.52935
NR_027425.1	0	0	0	0	0	0	0	0	0	0	0	0.0199086	0	0	0
NR_026802.1	0.0457163	0.43402	0.136355	0.0878647	0.191422	0.114672	0.125135	0.173171	0.170389	0.0538072	0	0.0710933	0.88378	0.0659624	0.499798
NR_003238.2	0	0	0	0	0	0	0	0	0	0	0	0	0	0	0
NR_027620.3	0.303278	0.643372	1.60484	0.200017	0.47232	0.622613	0.106515	0.419571	0.227999	0.284378	0.676808	0.323334	0.384198	0.311817	0.2307
NR_026758.2	0.101609	0.415815	0.589687	0.0282692	0.395315	0.384578	0.00976152	0.318433	0.0621041	0.300409	0.62254	0.0715556	0.349154	0.0518092	0.589931
NR_026938.2	0.0771505	0.283926	0.17477	0.0453327	0.110367	0.170525	0.0135614	0.0960129	0.0342623	0.218145	0.382704	0.0306169	0.101832	0.0367338	0.222893
NR_027402.1	0.215249	0.540337	0.145407	0.077433	0.304991	0.560866	0	0.60911	0.173379	0.838392	1.68126	0.156466	0	0.061576	0.446557
NR_027256.1	0	0	0	0	0	0	0	0	0	0	0	0	0	0	0
NR_045002.1	0.0735492	0.126911	0.370143	0	0	0.0528616	0.0710202	0	0.107405	0	0	0	0	0	0.0708933
NR_029404.1	0.0798759	0.199329	0.0412086	0.195461	0.0803087	0.353661	0.097552	0.137087	0.116186	0.0264116	0.0457409	0.125098	0.117412	0.230199	0.0754804
NR_038275.2	1.62947	2.10579	2.56498	1.23316	1.91599	1.2436	1.36813	1.89426	1.5204	1.28155	0.997752	1.02287	2.38115	0.699535	1.73744
NR_040113.1	0	0.0387999	0	0.0258552	0	0.0320035	0.00901045	0	0	0.0537816	0.0237647	0.0449355	0	0	0.0248356
NR_132962.1	0.0711356	0.869225	1.66125	0	0.405897	0.533708	0.0383157	0.50584	0	0.529102	0.571535	0	1.0522	0.101631	0.875766
NR_027916.2	0	0	0	0	0	0	0	0	0	0	0	0	0	0	0
NR_130741.1	0.321902	0	0	0	0	0.329648	0.0735044	0.319198	0.268939	0.0761911	0	0	0.132069	0.06992	0
NR_104039.1	0	0	0	0.703316	1.32268	0	0	0	0	0	0	2.57177	1.68074	1.19848	0
NR_040023.1	1.02191	2.29371	3.14346	0.777867	2.21734	2.04082	0.705253	1.77893	0.78274	1.48224	2.41692	0.779107	2.49148	0.554619	2.54917
NR_027421.1	3.62876	0	0	0.825475	0	4.40975	0	0	1.71644	2.45564	0	0	0	1.53141	2.1828
NR_046365.1	0	0	0	0	0	0	0	0	0	0	0	0	0	0	0
NR_027011.1	0	0.0359952	0	0.162203	0	0	0.0615557	0.0479769	0.041176	0.0276881	0	0	0.122156	0.0554529	0.0530883
NR_027156.1	0.0127145	0.0212795	0.180147	0.0311668	0.173711	0.105551	0	0.110746	0.0795434	0.0661312	0.126826	0.0683345	0	0	0.154368
NR_028501.1	0	0.0984377	0	0	0	0.0417999	0	0	0.0568545	0	0.0656333	0	0	0	0.0366089
NR_073421.2	0	0	0	0	0	0	0	0	0	0	0	0	0	0	0
NR_027632.1	0	0.358071	0	0.163282	0.205463	0.123456	0	0.226106	0.0731706	0.412946	0	0.0746217	0	0.561145	0
NR_026643.1	0	0	0	0	0	0	0	0	0	0	0	0	0	0	0
NR_073459.1	0	0	0	0	2.83692	0	0	0	0.189512	1.81559	0	0.586665	0	0	0
NR_110998.1	0	0	0	0	0	0	0	0	0	0	0.744522	0	0	0	0
NR_027508.1	0.0601918	0.19465	0.228468	0.137619	0.0553837	0.0542483	0.054391	0.712507	0.254915	0.0710926	0.249419	0.0598937	0.170346	0.146545	0.286203
NR_027411.2	0	0	0	0	0	0	0	2.2734e-08	0	0	0	0	0	0	0
NR_026743.1	0	0.0451135	0.0546816	0.0289064	0.304209	0.191061	0	0.0921663	0	0	0.188634	0.0467282	0	0.0230595	0.10086
NR_033857.1	0	0	0.123585	0	0	0.0920089	0	0	0	0	0.1376	0	0	0	0
NR_120439.1	0	0	0	0	0	0	0	0	0	0	0	0	0	0	0
NR_044994.1	0.169748	0.542152	0.927621	0.1042	0.582152	0.495902	0	0.0544926	0.0460957	0.217859	0.645861	0.0104176	0.0688434	0.0306867	0.430519
NR_003525.2	0.0100493	0.17013	0.177336	0.0225232	0.128109	0.0865099	0.0141514	0.0220572	0.0487525	0.125259	0.0574441	0.148528	0.158611	0.0483787	0.0990756
NR_130740.1	2.07936	4.21628	3.16761	1.37668	2.67767	3.92118	0.852062	1.89841	1.66253	2.19667	3.55562	2.11084	3.80576	1.40155	3.6296
NR_027634.1	2.46306	2.94262	3.85523	2.57933	1.99815	3.54252	1.54212	3.08028	2.18309	2.58892	3.7105	2.99684	3.30636	1.48776	2.46008
NR_003612.2	0.147413	0.407334	0.538018	0	0.310983	0.148665	0.167713	0.482431	0.0772992	0.329661	0.186407	0	0.337016	0.0545841	0.381433
NM_015070.5	0.0821634	0.773694	0.195772	0.168594	0.489346	0.301582	0	0.378915	0.0428102	0.180185	0.401322	0.128435	0.980253	0	0.420784
NM_001076788.1	0	1.64102e-07	0	2.46951e-05	4.51024e-09	1.54183e-05	0	0.956224	5.06665e-08	0	0.0095172	0	3.75464e-09	0	0.00143841
NM_001330564.1	0	7.15546e-10	0	8.45939e-05	4.1266e-09	1.48477e-05	0.0088426	0.335946	5.34065e-07	1.92842e-09	0.0110375	4.31287e-09	0.000610643	0.000332959	0.00156993
NR_136648.1	1.22417	1.70614	1.29576	0	0	0.24274	5.50932e-08	0.328109	0.215773	0.223457	1.03944	0	0	0	0.840284
NR_136691.1	0	0	0	0	0	0	0	0	0	0	0	0	0	0	0
NR_138054.1	0	0	0	0	0	0	0	0.405261	0	0	0	0.101625	0	0	4.64813e-10
NR_136646.1	0.3731	2.89606	1.71086	0	0	0.205475	5.77979e-08	0.117972	0.202775	0.10855	2.29678	0	0	0	0.296163
NR_136645.1	2.30828e-05	0	0	0.000508785	1.31779	0	1.65406e-06	8.9617e-06	9.82591e-09	0	0	4.91326e-08	1.57557e-07	5.48421e-08	1.22574e-05
NR_138056.1	0.0792071	0.00103525	0	0.000604477	0.926709	0.71092	0.822746	0.508922	1.53304e-06	7.84251e-10	1.02654	0.295078	1.29825	8.08348e-07	0
NR_136647.1	0	1.08408e-06	6.67241	3.36878	1.35088	2.32994	1.12256	0.793479	4.83931	0	4.98249	9.53995e-05	3.67681	1.00962	1.1529
NR_138091.1	0	0	0	0.00439596	0.133122	0.0160325	0	0.0119886	0	0	0	0	0.0313378	0	0
NM_015184.5	0	0	0	0	0.782671	6.70754e-06	1.91951e-08	0	0.769905	1.18846	0.481766	0.0508026	1.60096	0.221106	0.12291
NR_049732.1	0	0	0	0	0	0	0	0	0	0	0	0	0	0	0
NR_138483.1	0	0	2.86608e-06	0	0	0	0.380892	0	3.54491e-06	7.65644e-07	0.00102382	0	2.32016e-09	0	0
NR_130126.1	0	0	0	0	0	0	0	0	0	0	0	0	0	0	0
NR_049731.1	0	0	0	0	0	0	0	0	0	0	0	0	0	0	0
NR_028052.1	49.8058	81.0375	65.014	77.4736	59.228	98.1114	32.1102	28.8935	51.7364	55.0997	63.9097	94.8038	52.3155	62.5678	47.2745
NR_049733.1	0	0	0	0	0	0	0	0	0	0	0	0	0	0	0
NR_049734.1	0	0	0	0	0	0	0	0	0	0	0	0	0	0	0
NR_103481.1	0	0	0	0	0	0	0	0	0	0	0	0	0	0	0
NR_138485.1	0.922807	0.877862	2.40272	0.1082	0.846946	0.49878	0.756642	0.171234	0.495925	1.472	0.734174	0.00385903	1.94037	0.304515	0.692525
NR_130972.1	0	0.517783	0	0	0.00122557	0.731277	0	0	0	0	4.67088e-08	0	0	0.462481	0
NR_104600.1	1.25967	2.1843	0	1.25791	0	2.70224	2.07433	0.820962	1.53315	1.02153	4.49097	3.28381	2.54572	3.42239	0.509201
NR_121210.1	0.0185127	0	0	0.0608489	0.0794668	0.0540465	0.012264	0.0210587	0.0182541	0.00576289	0	0	0	0.136899	0.0233674
NR_134878.1	0.037672	0.101427	0.0698607	0.0389371	0.0376737	0.0610103	0	0	0	0.0374054	0.125622	0.035224	0.112573	0.0197114	0.108391
NR_037162.1	0.451546	1.21638	0.860854	0.167539	0.421589	0.636699	0	0.454646	0.292655	0.540309	0.731787	0.0749535	0.585914	0.0933004	0.641843
NR_138484.1	1.38336	3.5224	8.05131	4.64643	2.71581	6.13716	0.275858	0.336166	1.9759	2.27036	4.35802	1.045	5.82593	1.91292	3.38433
NR_073398.1	0.309782	0	0.154758	0	2.06512e-08	0	0	0	0.258388	0	0	0	0.345157	0	0.669862
NR_136519.1	0.134788	0.238445	0.380327	0.109693	0.144474	0.19888	0.234589	0.406224	0.0352165	0.166446	0.290893	0.0713946	0.330686	0.165485	0.236192
NR_002837.1	0.18091	0	0	0.379277	0.0941578	0	0	0	0	0.0827929	0.142851	0.11842	0	0	0
NR_027279.1	0	0	0	0	0	0	0	0	0	0	0	0	0	0	0
NR_003264.2	4.20787	12.4599	13.0661	6.97074	5.31843	14.3081	4.3832	5.30515	7.86264	4.61997	10.5407	3.01634	10.7074	4.44092	4.73676
NR_015340.1	0	0	0	0	0	0	0	0	0	0	0	0	0	0	0
NR_033864.1	0	0	0	0	0	0	0	0	0	0	0	0	0	0	0
NR_033410.1	0	0	0	0.0218678	0	0.117767	0	0.133388	0.03836	0.0264592	0	0	0	0.0175868	0.102709
NR_003228.1	0.595525	0.494952	0.566212	0.69994	0.306842	0.248283	1.34089	0.361442	0.783471	0.318848	0.529783	0.175624	0	0.472991	0.171038
NR_003263.2	5.73554	10.2326	18.2318	4.41389	8.40174	10.1097	2.40073	23.6881	7.21575	9.87334	11.779	5.66311	12.1882	2.65062	13.474
NR_110506.1	0.0657157	0	0	0	0.094641	0	0.0618526	0	0.061412	0	0	0.102714	0	0.1015	0
NR_002829.1	0	0	0	0	0	0	0	0	0	0	0	0	0	0	0
NR_003266.2	2.93648	8.83243	7.88431	3.53048	6.6467	6.69588	2.58771	3.38484	2.15303	4.30416	8.28604	4.69565	6.15468	4.05599	5.32745
NR_003661.2	0.508459	1.21344	2.15841	0.282486	0.763208	1.00651	0.511012	0.96985	0.245439	0.572678	1.08626	0.411986	1.80392	0.118089	1.02279
NR_024162.1	0.126118	0.0816238	0.364362	0.0967115	0.162405	0.261094	0.0652638	0.0253321	0.0430372	0.306883	0.59207	0.0785606	0.438931	0.0407221	0.236776
NR_138479.1	0.364367	1.64463	1.72227	1.69902	0	1.87482	1.00546	0.929081	0	0.851174	4.36502	0.676198	1.77121	1.23327	0.490532
NR_040243.1	0.221677	0.383628	0.353566	0	0.00148287	0.0026806	0	0.00630881	0.0133875	0.341077	0	0.00440666	0	0	0.000347608
NR_040241.1	0.595642	0.553646	0.188006	0	0.410756	1.04603	0.658975	0.227	1.02204	0.521802	0	0.0183288	8.6233e-07	0	1.54705
NR_073201.3	0.776598	1.97786	2.05543	1.38486	0.898072	1.57533	0.563359	4.57765	0.467247	3.09561	4.47507	0.981751	2.48379	4.38023e-05	3.18923
NR_045670.1	4.11863	1.76004	5.23901	3.42512	3.22509	3.08839	2.53396	3.28067	3.23422	0.544366	2.98951	3.53672	3.83776	3.61037	2.98573
NR_045669.1	0	3.11318	4.04745	0.0941916	0.973725	2.19112	0	0.729924	0.345042	0.231662	0.541622	0.539584	1.50633	0	2.58038
NR_045671.1	11.9502	5.5782	21.81	8.37734	2.72059	5.82901	3.15159	3.28026	7.44475	0.94906	6.19389	8.08718	11.864	5.76969	8.06945
NR_136732.1	0	0	0	0	0	0	0	0	0	4.1348e-07	0	0.353072	0	0	3.57806e-10
NR_104307.2	0	5.88495	3.67045	1.19865	0.119178	1.47331	0.261657	0.761571	0.439697	0.587382	4.67465	1.09362	5.15971	0.449433	3.58771
NR_104309.2	0	1.0056e-07	3.8015e-06	6.91918e-10	0.970985	5.34832e-08	0	8.48725e-06	1.11891e-07	2.40821e-08	7.63963e-09	3.68063e-07	0	1.20757e-10	0.956782
NR_136731.1	0.259362	0.747351	2.9886	0.148954	0	0.545623	0	0.350379	0.0378603	0	0.341725	2.20015e-07	0.350236	0.0932489	0
NR_045072.1	1.04842	1.67564	0	1.39526	1.04978	4.36505	0.624506	1.33917	0.481751	2.24064	3.18412	1.51122	4.70576	1.12161	1.66037
NM_001244892.1	0	0	0	0	0	0	0	0	0	0	0	0	0	0	0
NM_001291703.1	0	0	0	0	0	0	0	0	0	0	0	0	0	0	0
NM_001144064.2	0	0	0	0	0	0	0	0	0	0	0	0	0	0	0
NM_001281730.1	0	0	0	0	0	0	0	0	0	0	0	0	0	0	0
NM_001291702.1	0	0	0	0	0	0	0	0	0	0	0	0	0	0	0
NR_136344.1	4.01302e-08	8.6281	0	1.96013	3.62333	5.40454	5.89597e-05	1.22635e-05	0.0320387	0.79445	0.289412	9.19189	0	12.7137	2.79056
NR_138550.1	1.21278	7.99567	1.69348	4.06993	4.55932	5.93626	0.659321	0.150731	0.607639	2.21772	2.59565	4.85486	4.52247	3.04822	1.8135
NR_138564.1	0	0	2.29896	3.2669	0	0.00465083	0	0	0	0	0.850725	7.27057e-08	0	0	2.19751
NM_001310219.1	0	0	0.103256	0	0.794128	0	0	0	0.0984958	0	0	0	0	0.0437263	0.126844
NM_001330566.1	2.79852e-06	0.453652	1.70416	0.730798	2.65704	0.635326	0.448948	0.612216	0.208783	0.694583	0.505471	0.499704	3.77265	0.00598562	0.317034
NM_001330306.1	0	0	0	0	0	0.0861071	0	0	0	0	0	0	0	0	0
NM_001330565.1	0	2.04231	2.68624	0.0927241	0.940722	1.34176	0	3.72376	0.241488	0.0184247	3.86054	1.22767e-09	3.3523e-05	0	2.09561
NM_001320037.1	3.35604e-08	0	9.32151e-09	0.342408	0	0.642666	0	0	0.495862	0	0.0162619	0	0.939041	0	0.000119327
NM_001330567.1	0.00279092	0.00504184	0.00509443	0.230367	0.4189	0.8363	0.140575	1.2451	1.37969	2.42461	3.56635	0.000372744	3.53913	0.408672	1.73576
NR_138571.1	0.216331	0.312536	0	0	0.628006	0	0.162896	0	0	1.4646e-10	1.35901	0.1906	0.403261	0.129347	0.367287
NR_138574.1	0.0669256	0.0687093	0	0	0.248268	0	0.0495656	0	0	0	0	0.0302769	0	0.0335561	0.0797498
NR_138572.1	0	0.412148	0	0.238273	0	0.0798347	0	0	0.174354	0	0	0	0	0.139636	0.15267
NR_138575.1	0.0731626	0.685186	1.3071	0	0.426233	0.470013	1.08975e-10	0.444519	0	0.355598	1.031	0.0255078	1.1956	0	0.277499
NR_138612.1	12.6883	4.02961	7.78392	5.93792	4.10457	6.8557	8.53428	8.7921	5.97253	4.37091	5.12439	6.57116	4.76419	7.21012	1.56249
NR_046228.1	0.193252	1.15593	2.30241	0.576954	0.641084	0.358602	0.301896	0.554682	0.451938	0.254035	0.262901	0.324273	0.694233	0.227864	1.08338
NR_144301.1	0.00161113	0.626243	0	0.0569869	0.275074	0.34704	0	1.00849e-08	0	0.0171468	0.277649	0.025709	0.298282	0.0193672	0.445331
NR_144303.1	0	0.132739	0.753868	0.000383526	0	4.2392e-05	0	0.121101	0	0.0259712	0	0	0	0	0
NR_144310.1	0.115638	0.13555	0.0539368	0.0376872	0.544437	0.394425	0	0.343257	0.0674468	0.401405	0.482763	0.138519	0.0491332	0.0342595	0.090369
NR_144305.1	0	0	0	1.07165e-09	1.76025e-06	1.97091e-07	0.087006	0	0	0	0	0	0	0	0
NR_036619.1	0.736583	0.797795	1.7099	0.238612	0.171855	0.534106	0.893874	0.475945	1.41608	0.218399	0.940168	0.147664	0.503897	0.0195848	0.15985
NR_026956.1	0.758105	2.20756	2.29441	0.191615	1.19752	1.26219	0.729873	1.03506	0.659703	0.674388	3.01396	0.382088	1.80578	0.152927	0.986282
NR_026814.1	0	0	0	0	0.0912	0	0	0	0	0	0	0	0	0	0
NR_024160.1	0	0	0.178896	0.0952667	0	0	0	0	0.127986	0	0	0	0.251613	0	0
NR_024355.1	0.959795	0.906083	1.79548	0.424951	0.836894	0.874439	0.525531	1.50426	0.689838	0.447327	0.219684	0.493743	2.5253	0.274567	1.50105
NR_024157.1	0.665276	3.07307	2.12578	1.69152	3.5486	4.66001	0.636162	1.93291	1.24364	3.738	5.53886	0.419593	2.35166	0.879684	3.0874
NR_026763.1	0.175244	0	0	0.0449178	0.0515803	0	0.229304	0.149802	0.126265	0.0526666	0.194238	0.0644031	0	0.0985612	0.158298
NM_052877.4	0.875738	7.80175	1.60275	10.4825	7.03867	6.76914	2.46757	0.486123	1.45646	7.37611	5.29223	6.77792	3.12912	12.2811	9.3486
NR_102272.1	2.44287	2.39507	1.78187	2.31896	4.80364	2.33321	2.85388	2.56025	2.74063	3.31241	4.03546	3.09472	1.15723	3.17432	2.50334
NR_123732.1	0	0	1.02802	0	0	0	0	0.757969	0	0.0786969	0	0	0	0	0.235686
NR_072993.1	0	0	0	0	0	0	0	0	0	0	0	0.0358148	0.28254	2.1995e-06	0
NR_040101.1	24.8615	0	1.50457	0	0	0	21.1787	46.1706	2.39118	0.77732	0.801554	0	0	0	2.62358
NR_033119.2	0	0	0	0	0	0	0	0	0	0	0	0	0	0	0
NR_033118.2	0	0	0	0	0	0	0	0	0	0	0	0	0	0	0
NR_070308.1	0	0	0	0	0	0	0	0	0	0	0	0	0	0	0
NR_110381.1	0	0.132514	0	0	0	0	0	0	0.0272335	0.102659	0	0	0	0	0
NR_072992.1	0.160951	0.168251	0.47115	0.193	0.202715	0.349847	0.0930266	0.256907	0.207428	0.32506	0.199547	0.193745	0.125252	0.0283283	0.311649
NR_045513.1	0	2.07149	5.95044	1.13856	1.81671	0.760538	0.701989	1.00479	1.59625	0.688578	0	2.95254	0	0	2.65378
NR_144319.1	0	0	0	0	0	0	0	0	0	0	0	0	0	0	0
NR_037664.1	0	0	0	0	0	0	0	0	0	0	0	0	0	0	0
NR_070309.1	0	0	0	0	0	0	0	0	0	0	0	0	0	0	0
NR_037663.1	0	0	0	0	0	0	0	0	0	0	0	0	0	0	0
NR_040762.1	0	0	0	0	0	0	0	0	0	0	0	0	0	0	0
NR_132374.1	0	0	0	0	0	0	0	0	0	0	0	0	0	0	0
NR_040035.1	0	0	0	0	0	0	0	0	0	0	0	0	0	0	0
NR_038258.1	0	0	0	0	0	0	0	0	0	0	0	0	0	0	0
NR_024433.1	0.297611	0.372149	0.856553	0.0887616	0.203916	0.363167	0.153856	0.34714	0.223492	0.243295	0.3428	0.083418	0.274463	0.0744017	0.490579
NR_002815.2	0.0277895	0	0.025768	0	0	0	0	0.0183472	0	0	0.032422	0	0	0	0.0498192
NR_138604.1	49.8529	45.4738	64.2567	42.26	29.4729	47.6532	34.0899	40.1294	57.1045	25.9752	30.2466	59.5486	34.8803	36.4615	38.7796
NR_144342.1	0	0	0	0	0.000325107	0	0.0015164	0.000102427	1.2778e-08	7.5941e-07	0	0	0	0	0.00131658
NR_144340.1	0	0	0	0	0.655018	3.89274e-08	1.03497	0.112907	1.11694e-05	0.000841437	0	0	0	0	1.05974
NR_144338.1	0.430582	0	0.000225306	0.72854	0	0	0	2.85181	0	0	1.69292e-08	1.14906	4.62146	2.37633	0.0116441
NR_144341.1	0	0	0	0	0.00115226	0	0.00448904	0.000328381	3.94161e-08	2.43676e-06	0	0	0	0	0.00400591
NR_144339.1	0	0	0	0	5.90819e-07	0	6.76335e-06	3.06961e-07	0	2.26615e-09	0	0	0	0	5.1213e-06
NR_144318.1	1.9767	8.75204	3.806	9.13876	2.12369	2.98502	1.5497	15.3157	4.0099	0.0878426	7.90068	2.60951	13.6346	5.97942	3.34458
NR_144344.1	0	0	0	0.481128	1.6149e-09	0	0	0	1.71317e-06	0	0	0	0.0177105	0	0
NR_144348.1	1.1638e-07	0.0116249	1.71874	0.203387	3.9535e-07	0.815941	9.35237e-08	0.782053	0.0423964	0	0	0.355895	1.13972	0	0.704308
NR_144346.1	0	0	0	0	0	0	0	0	0	0	0	0	0	0	0.181406
NR_144345.1	0	0.620266	1.36682	0	0.00738128	0.737469	0	0	0	6.39898e-09	0.175884	0.100965	0	0.408388	0
NR_144347.1	0.216823	0	0.34827	0	0	0	0	0	0	0	0	0	0	0	0
NR_144349.1	1.45838	0	2.63814	8.44571e-08	0	0	6.36691e-06	4.25426	2.52797e-06	0	0.131399	0	7.71484e-06	1.61997	0
NR_144358.1	0	0	0	6.19474e-08	0	1.0328e-05	9.30347e-10	0	0	0	0	0	4.33313	0	0
NR_144354.1	0	0	0	0	0	0	0.0351553	0	0	0	0	0	0	0	0
NR_144355.1	0	0.271626	0.202099	0.17558	0	0	0	0	0	0	0	0	0.440079	0.0781647	0
NR_003929.2	0.429446	1.15031	1.16181	0.174242	0.234648	0.34447	0.410798	1.03014	0.434091	0.499877	0.791187	0.28979	0.820237	0.26057	1.21249
NR_144317.1	0.663334	0.871702	1.99263	0.158681	0.227745	0.617908	1.61814	0	0.403843	0	0.395237	0.417066	0	0.532189	0.843845
NR_130125.1	0	0.0592503	0	0	0.0250827	0	0.0171827	0	0.0171106	0	0	0	0	0	0
NR_144370.1	0	0	0	0	0	0	0	0	0	0	0	0	0	0	0
NR_144366.1	0.914362	6.16647	8.80967	1.04135	3.66887	3.87733	0.660903	0.681824	0.173046	2.36711	4.78641	0.908199	5.1173	0.772527	2.87627
NR_144369.1	13.0878	5.55129	6.56411	6.05397	0	8.73856	4.99962	14.9939	11.9749	6.12123	16.8329	10.9103	0.302689	5.51463	6.75073
NR_027287.2	0.453572	0.884525	0.900695	0.269221	0.827657	0.878723	0.304544	0.696657	0.204068	0.470308	0.687389	0.245627	0.810061	0.105061	0.981201
NR_144357.1	0.0899685	0	0	0	0.134031	0.363163	0	0.303828	0.117335	0.0200296	0	0	0	0	0
NR_144326.1	0	0.421804	0.493569	0.181575	0	0	0	0.340343	0	0	0	0.268782	5.34241e-10	0	0
NR_144327.1	0.524508	0	0.68078	0.528175	1.01495	0.0592673	0.0607122	0.849512	0.395191	0.880913	0.768833	0	0	0.184533	0.282947
NR_144328.1	0	1.89632	2.15852	0.0923165	0	0	0	1.44153	0.167492	0.18841	2.22519	0.107944	0	0	0.0981654
NR_144329.1	0	0	0	0	0	0	0	0.302798	0.156536	0	0	0	0	0	0
NR_144331.1	0.26685	1.93104e-09	0	0	1.3086e-07	0	1.17426e-07	0	0	0	2.52852e-10	0	0.0735456	0.0921669	0
NR_144330.1	0	0	0	0	0.66977	2.6839	9.91158e-07	8.18589e-10	0	0	0	0	1.53829	0	0
NR_144332.1	0	0	0	0	0	0.00749541	0	1.98199e-06	0	0	0	0	0	0	1.90781
NR_144334.1	0	0	0	0	0	0	0	0	0	0	0	0	0	0	0
NR_144333.1	0	0	0	0	0	0	0	0.324937	0	0	0	0	0	0	0
NR_144359.1	0	0	0	0	0	0	0	0	0	0	0	0	0	0	0
NR_123728.1	0	0	0	0	0	0	0	0	0	0	0	0	0	0	0
NR_003688.1	0	0	0	0	0	0	0	0	0	0	0	0	0	0	0
NR_023847.2	0	0	0	0	0	0	0	0	0	0	0	0	0	0	0
NR_004381.1	0	0	0	0	0	0	0	0	0	0	0	0	0	0	0
NR_002438.1	0	0	0	0	0	0	0	0	0.014527	0	0	0	0	0	0
NR_144383.1	0.0474512	0.143064	0.0320783	0	0.116504	0.307674	0.0709334	0.246003	0.0551477	0.0225191	0.257236	0.0824309	0.101848	0.0428726	0.0211864
NR_024187.2	2.2314	7.82436	14.0721	5.3771	3.16526	5.65148	2.36069	2.04305	2.37825	1.92484	5.20886	0.549597	5.34209	0.54351	3.09664
NR_144395.1	2.7243	3.9967	3.07849	1.55823	2.40218	2.78464	1.64956	3.45187	3.02799	1.31444	3.99746	1.18872	3.7706	1.20846	4.08351
NR_144394.1	0.279369	2.18045	4.27984	0.729858	1.61362	1.91912	0.683303	1.18174	0.585512	1.66453	2.25633	0.187937	1.8922	0.275485	0.840691
NR_144393.1	0	5.85899	10.176	3.39339	0.417778	9.25211	0.827098	0.282954	4.08595	0	4.86911	2.06911	9.68914	4.09651	3.07717
NR_144402.1	8.96382	18.7554	20.7525	8.80244	13.9865	26.1078	4.90575	10.9796	6.74032	10.8728	13.1639	12.4638	17.8753	6.5362	14.8829
NM_001252608.1	0.464359	1.08567	4.10391e-07	0.825482	1.30525	1.94205	0	2.12516	0.704412	0.890695	0.00492822	0.380665	0.759163	0	0
NM_006574.3	0.781695	5.94537	5.90314	1.80382	7.08922	7.78835	1.89041	6.40368	2.01468	6.56028	6.75052	1.09113	3.61811	1.8084	5.20807
NR_033670.1	0	0	0	0	0	0	0	0	0	0	0	0	0	0	0
NR_073519.1	0	0	0	2.41024e-08	0.63546	1.26315e-08	1.22609e-07	0.000133696	1.6751e-07	6.53466e-06	0	1.26972e-08	6.10735e-09	1.13636e-06	9.65217e-08
NR_036565.1	1.22201	5.93016	6.73277	2.69027	6.3581	4.19715	1.62496	1.15065	0.466461	0.602552	5.49285	3.47986	11.9173	3.05761	2.6197
NR_036571.2	0.512999	0.164497	0.303014	0.100678	0.067611	0.23022	0.0457182	0.192462	0.384063	0.189068	0.212301	0.250161	0	0.106732	0
NR_029462.1	0	0	0	0	0	0	0	0	0	0	0	0	0	0	0
NR_033488.1	0.740988	1.74254	1.31891	0.535524	1.95609	1.70242	0.624501	0.234435	0.264788	1.02244	0.838491	0.0793715	0.850963	0	0.835311
NR_103502.1	0	0	0	0	0	0.0223375	0	0	0	0	0	0	0	0	0
NR_033489.1	1.4748e-09	0	3.94651	1.67778	3.51521	2.09059	1.5028	16.1698	3.83078	3.75901	7.07313	0.693492	3.10164e-07	0.650739	0.01884
NR_027997.1	0	0	0	0	0	0	0	0	0	0	0	0	0	0	0
NR_027261.1	10.4161	25.6291	13.5592	15.2239	17.0514	19.5317	12.9148	4.80553	12.0135	12.6536	18.5095	15.2409	9.16771	14.4849	8.72315
NR_027780.1	0.34773	0.000846952	0	1.6151	2.49551	9.19798	1.54936	1.51897e-05	6.89823e-06	1.16425	0.0539395	2.44974	3.23919	2.71146	0.434046
NR_036564.1	1.84951	5.7205	4.31409	0.589094	6.18049	3.37539	0.769869	1.84346	1.8949	2.85218	5.97505	0.580759	2.47092	0.890542	4.92443
NR_028000.1	0	0	0	0	0	0	0	0	0	0	0	0	0	0	0
NR_029461.1	0	0	0	0	0	0	0	0	0	0	0	0	0	0	0
NR_029413.1	0	0	0	0	0	0	0	0	0	0	0	0	0	0	0
NR_027996.1	0	0	0	0	0	0.263412	0	0	0	0	0	0	0	0	0
NR_027998.1	0	0	0	0	0	0	0	0	0	0	0	0	0	0	0
NR_033669.1	0	0	0	0	0	0	0	0	0	0	0	0	0	0	0
NR_049728.1	2.86837	3.22717	5.71728	11.1548	0	0	0.0262976	7.06545e-06	2.52821	0	1.53669	3.83905	2.50025	3.77885	0
NR_046353.1	0	0	0	0	0	0	0	0	0.0134669	0	0	0	0	0	0.0173428
NR_002448.1	0	0	0	0	0	0	0	0	0	0	0	0	0	0	0
NR_045382.1	0	0.172846	0.520634	0	0.289295	0.377448	0	0	0	0	0.456817	0	0.42933	0	0
NR_002216.1	0	0	0	0	0	0	0	0	0	0	0	0	0	0	0
NR_046653.1	0	0	0	0	0	0	0	0	0	0	0	0	0	0	0
NR_001571.2	0	0	0	0	0	0	0	0	0	0	0	0	0	0	0
NR_051987.1	0	0	0	0	0	0	0	0	0	0	0	0	0	0	0
NR_023363.1	0	0	0	0	0	0	0	0	0	0	0	0	0	0	0
NR_103791.1	0	0	0	0	0	0	0	0	0	0	0	0	0	0	0
NR_027795.1	0.4733	3.53704	2.47731	1.25622	1.76028	3.17619	0.567159	0.890904	0.890418	0.972897	3.81493	0.339096	2.44677	0.770376	1.86589
NR_002718.2	0.152991	0.164096	0.367806	0.0553724	0.107891	0.129906	0.244188	0.140781	0.18594	0.226933	0.32934	0.227266	0.389609	0.0224939	0.225771
NR_039977.1	0	0	0	0	0	0	0	0	0	0	0	0	0	0	0
NR_038281.1	0	0	0	0	0	0	0	0	0	0	0	0	0	0	0.000225437
NR_023367.1	0	0	0	0	0	0	0	0	0	0	0	0	0	0	0
NR_036546.1	0	0	0.0586444	0	0	0.0822561	0	0	0	0	0.0322891	0	0.123723	0	0
NR_038949.1	0	0	0	0	0	0	0	0	0	0	0.0267729	0.0209296	0	0	0
NR_023376.1	0	0	0	0	0	0	0	0	0	0	0	0	0	0	0
NR_003573.1	1.41025	1.22711	0.560266	0.638935	1.50185	0.978702	0.692716	1.36417	1.15385	1.75956	0.665386	0.266346	1.44466	1.02768	2.16216
NR_049775.1	0	0	0	0	0	0	0	0	0	0	0	0	0	0	0
NR_038947.1	0	0	0	0	0	0	0	0	0	0	0	0	0	0	0
NR_001526.1	0	0	0	0	0	0	0	0	0	0	0	0	0	0	0
NR_046622.1	0	0	0	0	0	0	0	0	0	0	0	0	0	0	0
NR_104033.1	0	0	0	0	0	0	0	0	0	0	0	0	0	0	0
NR_002580.1	0	0	0	0	0	0	0	0	0	0	0	0	0	0	0
NR_003137.2	0	0	0	0	0	0	0	0	0	0	0	0	0	0	0
NR_002727.2	0.864396	1.63696	2.28515	0.698089	1.32859	1.84163	0.620936	1.29917	0.846076	1.44235	1.53573	0.988733	1.97729	0.321608	1.6921
NR_037925.1	0	0	0	0	0	0.0746902	0	0.157257	0	0	0.147438	0.0286624	0.0962787	0.0449201	0.0900564
NR_038913.1	0.0316678	0.529968	0.449243	0.170881	0.269225	0.58511	0.153692	0.179227	0.153047	0.123345	0.353356	0.110494	0.270792	0.0815324	0.433608
NR_002160.1	0	0	0	0	0	0	0	0	0	0	0	0	0	0	0
NR_040019.1	9.24982	2.94761	5.4989	3.3393	2.8329	2.90925	4.80543	4.47228	6.30365	2.53398	5.0992	5.48113	3.93488	4.00362	5.35867
NR_024463.1	0	0	0	0.0839272	0	0	0.0155936	0.0193575	0.0155281	0	0	0	0	0.0137872	0.0413291
NR_002948.1	0	0	0	0	0	0	0.0340408	0.0396964	0	0	0	0	0	0	0
[truncated: 158,033 more rows]
