# Supplementary material
Source: HighWire-hosted journal article supplement (doi:10.1101/rna.079643.123)
Supplement: Supplemental_DataS4_GeneListUpDown.xlsx [file Supplemental_DataS4_GeneListUpDown.xlsx]

## Sheet: WT vs. non-targeting RNA
name	description	log2FoldChange	pvalue	padj
CXCL1	CXCL1	2.07879	26.1496	1.22229e-23
TNFRSF1B	TNFRSF1B	2.0433	1.58197	1
SAA2	SAA2	1.93973	2.99154	0.0431578
C11orf86	C11orf86	1.81191	2.15036	0.175542
SAA2-SAA4	SAA2-SAA4	1.65393	1.36897	1
SAA1	SAA1	1.55537	2.61962	0.0819993
ANO3	ANO3	1.5398	2.75605	0.0646989
SPRY1	SPRY1	1.52196	2.19999	0.16273
ANGPTL4	ANGPTL4	1.49563	3.40766	0.0192066
SPINK4	SPINK4	1.45052	1.54003	0.468618
PRR15	PRR15	1.39681	1.8312	0.297984
MAL2	MAL2	1.33667	11.1819	2.59322e-09
ABCA10	ABCA10	1.29031	1.392	0.570361
PI3	PI3	1.27224	2.16601	0.172429
EHF	EHF	1.25764	1.4667	0.519985
DDX60	DDX60	1.24974	11.1036	3.01959e-09
CXCL2	CXCL2	1.23752	5.88471	0.000149941
KLRC2	KLRC2	1.2339	4.25459	0.00383885
IL18R1	IL18R1	1.21219	1.8027	0.309529
OASL	OASL	1.20822	5.8295	0.000167477
SNCAIP	SNCAIP	1.18789	2.95191	0.0467083
STRA6	STRA6	1.1637	8.83523	3.53759e-07
CXCL3	CXCL3	1.13693	1.64955	0.396459
KLRC3	KLRC3	1.13397	2.74015	0.066932
IL6	IL6	1.1167	6.69396	2.78676e-05
SNORA71D	SNORA71D	1.08885	1.64464	0.397879
TERT	TERT	1.08507	2.05275	0.206415
IFI44	IFI44	1.08448	5.39766	0.000415243
SVEP1	SVEP1	1.07519	2.38544	0.121117
ITGA4	ITGA4	-1.00001	3.06629	0.0376503
LOC100507156	LOC100507156	-1.00371	2.52474	0.0953646
DCLK1	DCLK1	-1.00717	4.27133	0.00371219
ADAMTSL4-AS1	ADAMTSL4-AS1	-1.00839	1.31303	0.628962
C6orf223	C6orf223	-1.01899	1.87685	0.278445
RNF150	RNF150	-1.01908	9.98899	2.94836e-08
EPPK1	EPPK1	-1.02114	2.46095	0.106321
THBS1	THBS1	-1.02423	16.0322	7.53703e-14
SNORD17	SNORD17	-1.02802	3.53761	0.0150994
NXNL2	NXNL2	-1.02842	1.69982	0.366643
IGF1	IGF1	-1.02844	1.91156	0.261429
PTGES3L	PTGES3L	-1.03012	2.66304	0.0758899
HRCT1	HRCT1	-1.04622	1.94957	0.246374
LOC339059	LOC339059	-1.04624	1.47414	0.513981
ITGA7	ITGA7	-1.05377	1.78835	0.312852
CUZD1	CUZD1	-1.05393	1.41754	0.554925
LGSN	LGSN	-1.05582	1.46041	0.525243
LBH	LBH	-1.06148	7.8503	2.66802e-06
JUN	JUN	-1.06652	8.15085	1.4513e-06
ARID3A	ARID3A	-1.06951	3.55122	0.0146889
CYR61	CYR61	-1.07693	18.8144	1.51118e-16
TPM1	TPM1	-1.0834	21.0167	1.3276e-18
EVA1A	EVA1A	-1.08605	2.39563	0.11934
CELF2	CELF2	-1.08891	1.69935	0.366643
TSPAN18	TSPAN18	-1.09001	1.38464	0.576013
LIMA1	LIMA1	-1.09116	11.7805	8.16914e-10
IGSF10	IGSF10	-1.09383	9.16522	1.68424e-07
FBLIM1	FBLIM1	-1.10127	7.20922	1.00272e-05
MXRA8	MXRA8	-1.11175	1.76348	0.325661
KLHL3	KLHL3	-1.15162	1.34587	0.604098
VGLL3	VGLL3	-1.17905	8.61715	5.64691e-07
TGFB1I1	TGFB1I1	-1.18263	12.1086	4.29783e-10
KIAA1731NL	KIAA1731NL	-1.20039	2.70539	0.0711809
PDGFRB	PDGFRB	-1.21135	3.94133	0.00680767
ACOX3	ACOX3	-1.21446	7.98964	2.04801e-06
CSRP1	CSRP1	-1.22188	20.6597	2.7459e-18
MUC1	MUC1	-1.22301	10.8667	4.57459e-09
SCN9A	SCN9A	-1.23053	3.01787	0.0415101
NR4A3	NR4A3	-1.23917	6.56012	3.55068e-05
MAFB	MAFB	-1.25661	1.64952	0.396459
AQP1	AQP1	-1.26379	3.08691	0.0363198
JPH2	JPH2	-1.27076	12.6729	1.22107e-10
DOCK2	DOCK2	-1.2805	4.07493	0.00547705
FBLN5	FBLN5	-1.28216	11.484	1.37179e-09
RNU6-2	RNU6-2	-1.28372	1.76616	0.324285
GLIPR2	GLIPR2	-1.29622	7.9335	2.26497e-06
TUBA1A	TUBA1A	-1.29639	11.9818	5.5337e-10
RTN4R	RTN4R	-1.30697	1.50713	0.489421
NEDD9	NEDD9	-1.32397	11.0198	3.43629e-09
HIVEP3	HIVEP3	-1.33356	11.5631	1.17924e-09
LOC100131315	LOC100131315	-1.34683	1.8305	0.298032
DCHS2	DCHS2	-1.34922	1.45694	0.528886
TSPAN2	TSPAN2	-1.35587	3.87367	0.00775472
LUZP2	LUZP2	-1.36278	3.15539	0.0316886
CASZ1	CASZ1	-1.36485	4.87746	0.00115069
TRIM29	TRIM29	-1.36652	3.08372	0.0363541
NUPR1	NUPR1	-1.38038	4.05514	0.00557468
GPR133	GPR133	-1.38581	5.62282	0.000254924
OLFML2A	OLFML2A	-1.38786	18.2023	5.77287e-16
RCAN3	RCAN3	-1.40096	3.4624	0.0174281
ITGA11	ITGA11	-1.4231	19.0761	8.90812e-17
INSIG1	INSIG1	-1.42441	14.1408	4.53549e-12
PCA3	PCA3	-1.43905	4.83027	0.00124366
ECEL1	ECEL1	-1.46735	2.56595	0.0888282
F3	F3	-1.473	19.9914	1.17286e-17
CYFIP2	CYFIP2	-1.49092	11.0127	3.43629e-09
MYL9	MYL9	-1.49227	33.2486	1.55702e-30
PRUNE2	PRUNE2	-1.51372	31.4534	7.82111e-29
LMNTD1	LMNTD1	-1.51501	1.78926	0.312635
SPOCD1	SPOCD1	-1.52622	15.301	3.63096e-13
AMTN	AMTN	-1.54094	2.29876	0.139892
WISP2	WISP2	-1.60861	4.87326	0.00115462
PAG1	PAG1	-1.60979	2.38695	0.120953
TOX	TOX	-1.63533	6.69997	2.78108e-05
PLEKHG1	PLEKHG1	-1.63812	3.81543	0.00868519
IGFBP5	IGFBP5	-1.65154	2.35528	0.127649
NPNT	NPNT	-1.65736	14.2697	3.53128e-12
SCARF2	SCARF2	-1.6671	1.81832	0.302965
PRKCB	PRKCB	-1.67073	2.59776	0.0843532
TP53I11	TP53I11	-1.67115	1.6415	0.399747
WFDC1	WFDC1	-1.67998	6.19031	8.02016e-05
MED12L	MED12L	-1.68542	2.94649	0.0471513
LRRC15	LRRC15	-1.68952	4.40424	0.00280399
MFAP5	MFAP5	-1.70152	6.37347	5.40653e-05
MYOCD	MYOCD	-1.70234	25.3128	7.46008e-23
WDR66	WDR66	-1.71205	2.13082	0.181337
OLFML2B	OLFML2B	-1.713	1.43768	0.539914
SLC9A7P1	SLC9A7P1	-1.71734	1.75917	0.328194
TNNC1	TNNC1	-1.71868	4.05743	0.0055709
MUC6	MUC6	-1.73551	1.63496	0.402752
KRT17	KRT17	-1.74138	42.6002	8.66015e-40
IL11	IL11	-1.75016	5.01967	0.000885027
LOC100128006	LOC100128006	-1.77633	7.25298	9.1739e-06
COL1A1	COL1A1	-1.78266	6.74025	2.58701e-05
ALPK2	ALPK2	-1.79936	11.7281	8.89877e-10
SSC5D	SSC5D	-1.83374	11.0396	3.40445e-09
BGN	BGN	-1.83755	1.61266	0.414064
PTPRQ	PTPRQ	-1.85263	2.04748	0.207885
C5orf46	C5orf46	-1.85298	2.90989	0.0505346
NKX2-5	NKX2-5	-1.87416	3.22811	0.0274757
LIMS2	LIMS2	-1.88434	16.7558	1.51327e-14
RBM24	RBM24	-1.89149	1.35677	1
FOXE1	FOXE1	-1.8935	8.54686	6.52842e-07
CGNL1	CGNL1	-1.92039	3.15641	0.0316886
LDB3	LDB3	-1.93594	2.25684	0.1486
TAGLN	TAGLN	-1.95851	43.4595	1.59649e-40
KCNH1	KCNH1	-1.96219	10.2982	1.54317e-08
RGCC	RGCC	-1.97912	1.49474	1
NPAS4	NPAS4	-1.98273	2.98592	0.0434528
MIR143HG	MIR143HG	-1.995	5.3139	0.000492472
LOC101928418	LOC101928418	-2.0312	2.40655	0.117626
SERPINE1	SERPINE1	-2.053	46.7937	1.10935e-43
ELN	ELN	-2.05688	2.3822	0.121763
SYTL2	SYTL2	-2.06125	1.60057	1
ALPP	ALPP	-2.08449	3.72233	0.0103773
ACTC1	ACTC1	-2.08733	14.6871	1.41792e-12
SULT1E1	SULT1E1	-2.11324	1.4418	1
EDN1	EDN1	-2.15359	4.75596	0.00143208
ROBO2	ROBO2	-2.17325	1.51793	1
FOXS1	FOXS1	-2.17334	3.18148	0.0303856
PDGFB	PDGFB	-2.20672	4.52429	0.00225461
TENM2	TENM2	-2.22655	10.7801	5.45064e-09
GPR17	GPR17	-2.25192	7.33891	7.61774e-06
FNDC1	FNDC1	-2.29375	2.66475	0.0757832
SYNPO2	SYNPO2	-2.32032	8.38896	9.08796e-07
KANK4	KANK4	-2.33705	1.41378	1
EDN2	EDN2	-2.40739	5.78852	0.000182556
CACNG4	CACNG4	-2.4288	11.6967	9.2478e-10
GPNMB	GPNMB	-2.43919	4.41123	0.0027735
IGFBPL1	IGFBPL1	-2.46255	1.51477	1
MYO7B	MYO7B	-2.61994	3.75451	0.0097523
CPEB2-AS1	CPEB2-AS1	-2.71037	1.37529	1
ACTA2-AS1	ACTA2-AS1	-2.71901	31.4014	7.82111e-29
ACTA2	ACTA2	-2.83749	49.0349	1.27328e-45
CRISPLD2	CRISPLD2	-2.91725	5.64271	0.000247342
SCARNA3	SCARNA3	-3.05893	1.81004	1
PLB1	PLB1	-3.14276	1.90107	1
SLC27A6	SLC27A6	-3.18486	1.95524	1
LINC00670	LINC00670	-3.2318	2.04588	1
CNN1	CNN1	-3.25713	10.9512	3.8599e-09
CDH3	CDH3	-3.47515	1.38962	1
CCIN	CCIN	-3.54103	1.41888	1
ACTG2	ACTG2	-3.57993	4.62009	0.00186964
LRRC2	LRRC2	-3.81749	1.67925	1
SLIT3	SLIT3	-3.89031	1.74068	1
WNT11	WNT11	-4.91661	1.37857	1
STOX1	STOX1	-4.92793	1.38949	1
MIR3178	MIR3178	-4.96296	1.38862	1
AIM1L	AIM1L	-4.98418	1.41897	1
MRVI1	MRVI1	-5.01875	1.44233	1
ERICH6-AS1	ERICH6-AS1	-5.0716	1.48249	1
CALHM1	CALHM1	-5.19384	1.56428	1
MUC7	MUC7	-5.22434	1.58275	1
FGF1	FGF1	-5.22522	1.58207	1
AOC1	AOC1	-5.36008	1.64813	1
MARCH4	MARCH4	-5.60703	1.8462	1
FNDC9	FNDC9	-5.79464	1.99682	1

## Sheet: WT vs. SRB non-targeting
name	description	log2FoldChange	pvalue	padj
ADAMTS20	ADAMTS20	6.64425	1.47578	0.999999
SEMA5A	SEMA5A	6.51301	1.39187	0.999999
IL33	IL33	6.51301	1.39187	0.999999
LINC01234	LINC01234	5.4594	1.85267	0.999999
TET1	TET1	5.27796	2.51939	0.999999
INHBA	INHBA	5.23263	1.67773	0.999999
ZNF93	ZNF93	5.16989	1.63095	0.999999
SERPINB2	SERPINB2	5.13747	1.60679	0.999999
EBI3	EBI3	4.84796	1.40082	0.999999
LHX8	LHX8	4.80732	1.37317	0.999999
CHRDL1	CHRDL1	4.79353	2.50381	0.999999
CCNYL2	CCNYL2	4.72244	1.96383	0.999999
GPR98	GPR98	4.63225	2.67076	0.999999
CNTN5	CNTN5	4.37849	1.65373	0.999999
ACTG2	ACTG2	4.35048	2.34304	0.999999
UNC13A	UNC13A	4.11546	2.52473	0.999999
CLEC2B	CLEC2B	4.10431	1.4271	0.999999
TFAP2C	TFAP2C	3.99998	1.3457	0.999999
IGFBP2	IGFBP2	3.91072	2.09227	0.999999
CD33	CD33	3.91072	2.09227	0.999999
GALNT6	GALNT6	3.80734	1.76789	0.999999
SEMA6B	SEMA6B	3.76552	1.47898	0.999999
AADACP1	AADACP1	3.61665	1.35386	0.999999
MAGED1	MAGED1	3.51936	1.84727	0.999999
ITGB2	ITGB2	3.48542	2.08062	0.999999
SHISA2	SHISA2	3.35049	1.92877	0.999999
STAP2	STAP2	3.24284	1.56742	0.999999
TMEM200A	TMEM200A	3.17449	1.62631	0.999999
KCNMA1	KCNMA1	3.07566	2.05692	0.999999
SLC16A2	SLC16A2	3.07038	1.63066	0.999999
CD163L1	CD163L1	3.06412	1.89456	0.999999
PROM1	PROM1	2.99999	1.55967	0.999999
GPNMB	GPNMB	2.94655	1.76387	0.999999
FNDC1	FNDC1	2.9151	1.37659	0.999999
FAM167A	FAM167A	2.85864	1.92773	0.999999
SDR16C5	SDR16C5	2.7824	2.084	0.999999
IFI27	IFI27	2.77322	1.57875	0.999999
ANGPTL2	ANGPTL2	2.76553	1.63903	0.999999
TRIM22	TRIM22	2.73696	1.39201	0.999999
GALNT18	GALNT18	2.69796	1.35496	0.999999
TP53I11	TP53I11	2.65788	1.31745	0.999999
PTX3	PTX3	2.62915	1.6671	0.999999
KRT81	KRT81	2.62292	1.35816	0.999999
PTCHD4	PTCHD4	2.61666	1.79819	0.999999
DKK 1.00	DKK 1.00	2.56559	2.155	0.999999
C5orf46	C5orf46	2.50007	1.477	0.999999
ARHGDIB	ARHGDIB	2.4736	2.16258	0.999999
QPRT	QPRT	2.47062	2.30538	0.999999
ANK1	ANK1	2.45066	1.83211	0.999999
IL17RD	IL17RD	2.4253	1.69873	0.999999
EDN1	EDN1	2.41078	1.52432	0.999999
RNF144B	RNF144B	2.40742	1.60273	0.999999
PAG1	PAG1	2.40599	1.47518	0.999999
KCNJ6	KCNJ6	2.37851	1.5312	0.999999
PRICKLE1	PRICKLE1	2.33858	1.89547	0.999999
ARL4C	ARL4C	2.33077	2.2858	0.999999
KIAA1462	KIAA1462	2.32576	1.34772	0.999999
CHST2	CHST2	2.31498	2.23476	0.999999
SH3TC2	SH3TC2	2.28856	1.757	0.999999
F2RL1	F2RL1	2.27301	1.62394	0.999999
C1orf226	C1orf226	2.26303	1.32815	0.999999
FAM84B	FAM84B	2.1785	1.90665	0.999999
IL1A	IL1A	2.16227	1.90383	0.999999
THBD	THBD	2.12285	1.53655	0.999999
DUSP6	DUSP6	2.10549	1.56667	0.999999
MAGEA3	MAGEA3	2.10524	1.73986	0.999999
KCNH1	KCNH1	2.10433	2.03881	0.999999
MYLK	MYLK	2.03355	1.87912	0.999999
MFAP5	MFAP5	2.02914	1.84507	0.999999
LOC100507156	LOC100507156	2.01249	2.06351	0.999999
ARRDC4	ARRDC4	2	1.39885	0.999999
SLC16A6	SLC16A6	1.99493	1.90709	0.999999
TOX	TOX	1.92471	1.83888	0.999999
SCN9A	SCN9A	1.91212	1.6232	0.999999
TOX2	TOX2	1.90837	1.53755	0.999999
CARD11	CARD11	1.90548	1.56752	0.999999
TMEM156	TMEM156	1.89061	1.83859	0.999999
DKK 3.00	DKK 3.00	1.87547	2.14681	0.999999
COL5A3	COL5A3	1.86651	1.55196	0.999999
LIPH	LIPH	1.84426	1.52498	0.999999
TMEM154	TMEM154	1.83335	1.34266	0.999999
PLAG1	PLAG1	1.78342	1.72848	0.999999
EDNRA	EDNRA	1.78197	1.82609	0.999999
FAM101B	FAM101B	1.78095	2.07604	0.999999
HDAC9	HDAC9	1.78043	1.55759	0.999999
ZNF618	ZNF618	1.75207	2.19747	0.999999
MGAT5B	MGAT5B	1.7449	1.59547	0.999999
TNFSF15	TNFSF15	1.7422	1.7728	0.999999
DUSP10	DUSP10	1.73054	1.78916	0.999999
SHROOM2	SHROOM2	1.72246	1.33511	0.999999
CITED4	CITED4	1.7176	1.83731	0.999999
ADRB2	ADRB2	1.70474	1.63525	0.999999
PRKCH	PRKCH	1.68947	1.57686	0.999999
CLIP2	CLIP2	1.63333	1.94327	0.999999
ADAMTS5	ADAMTS5	1.63093	1.56628	0.999999
RFTN1	RFTN1	1.63007	2.14246	0.999999
INSR	INSR	1.62293	1.63707	0.999999
RSPO3	RSPO3	1.6157	1.50161	0.999999
SLIT2	SLIT2	1.61074	2.0181	0.999999
PI3	PI3	1.59511	1.63633	0.999999
BMP4	BMP4	1.55833	1.7528	0.999999
ARHGAP31	ARHGAP31	1.54649	1.90078	0.999999
FOSL1	FOSL1	1.52714	2.0689	0.999999
HMGA2	HMGA2	1.52382	1.83508	0.999999
SLC2A3	SLC2A3	1.5229	1.47457	0.999999
TUBA1A	TUBA1A	1.52037	2.14049	0.999999
TIAM1	TIAM1	1.50482	1.57944	0.999999
SVEP1	SVEP1	1.50007	1.6662	0.999999
FAP	FAP	1.49794	1.87042	0.999999
CREB3L1	CREB3L1	1.49696	1.53137	0.999999
LOC100129940	LOC100129940	1.49657	1.73991	0.999999
FBLIM1	FBLIM1	1.45408	1.96372	0.999999
TRPC4	TRPC4	1.44625	1.66409	0.999999
SSC5D	SSC5D	1.4436	1.36459	0.999999
ABLIM3	ABLIM3	1.43098	1.90806	0.999999
NTN4	NTN4	1.42945	1.98843	0.999999
RASGRF2	RASGRF2	1.41321	1.35413	0.999999
FRMD6	FRMD6	1.40822	2.13164	0.999999
ITGB3	ITGB3	1.40583	1.76268	0.999999
LPHN1	LPHN1	1.40493	1.60969	0.999999
PTPRD	PTPRD	1.40389	1.41942	0.999999
SERPINB8	SERPINB8	1.39613	1.73668	0.999999
NYAP2	NYAP2	1.38218	1.6592	0.999999
MFI2	MFI2	1.34391	1.70418	0.999999
SPEG	SPEG	1.32888	2.14288	0.999999
GAS6	GAS6	1.32698	1.77623	0.999999
IKZF2	IKZF2	1.32413	1.50299	0.999999
EMP1	EMP1	1.32238	1.97837	0.999999
COL18A1	COL18A1	1.32193	1.41911	0.999999
IGFBP3	IGFBP3	1.3184	2.14098	0.999999
NUAK1	NUAK1	1.31695	2.08121	0.999999
FZD8	FZD8	1.31326	1.71148	0.999999
ADM	ADM	1.30992	1.3979	0.999999
FOXO1	FOXO1	1.30192	1.43526	0.999999
IL6	IL6	1.29503	1.97856	0.999999
NXN	NXN	1.28916	1.98803	0.999999
ABCA1	ABCA1	1.27433	1.66363	0.999999
KCNJ18	KCNJ18	1.26999	1.45221	0.999999
HOMER3	HOMER3	1.25303	1.58864	0.999999
SLCO4A1	SLCO4A1	1.25279	1.90607	0.999999
LPAR1	LPAR1	1.24865	1.51698	0.999999
RGL1	RGL1	1.21254	1.32652	0.999999
NT5E	NT5E	1.21025	1.45769	0.999999
ITGA1	ITGA1	1.20241	1.86995	0.999999
ADORA2B	ADORA2B	1.18826	1.50291	0.999999
OBSL1	OBSL1	1.18519	1.70929	0.999999
SERPINE1	SERPINE1	1.18085	1.89751	0.999999
CTSB	CTSB	1.17229	1.99039	0.999999
ANTXR2	ANTXR2	1.17181	1.30583	0.999999
LTBP2	LTBP2	1.16628	1.93765	0.999999
VGLL3	VGLL3	1.16482	1.53807	0.999999
EREG	EREG	1.15539	1.3373	0.999999
TXNIP	TXNIP	1.14999	1.66989	0.999999
NEDD4	NEDD4	1.14642	1.90519	0.999999
ETS1	ETS1	1.14391	1.58912	0.999999
TTYH3	TTYH3	1.1364	2.00221	0.999999
KCNJ12	KCNJ12	1.13568	1.57888	0.999999
ZMAT3	ZMAT3	1.1289	1.81686	0.999999
TMEM158	TMEM158	1.1211	1.6769	0.999999
EPHB2	EPHB2	1.11864	1.78244	0.999999
BDNF	BDNF	1.11632	1.66164	0.999999
CDA	CDA	1.11606	1.51542	0.999999
TLR4	TLR4	1.1022	1.73482	0.999999
COMMD7	COMMD7	1.09539	1.43805	0.999999
MMP15	MMP15	1.08988	1.4064	0.999999
GJA1	GJA1	1.08936	1.85586	0.999999
PAPPA-AS1	PAPPA-AS1	1.08908	1.75768	0.999999
ARHGEF28	ARHGEF28	1.08904	1.58219	0.999999
CDCP1	CDCP1	1.08541	1.9672	0.999999
SGK223	SGK223	1.08303	1.60922	0.999999
COL3A1	COL3A1	1.07018	2.02759	0.999999
SLC2A6	SLC2A6	1.06998	1.53411	0.999999
C1S	C1S	1.06992	1.62228	0.999999
STC2	STC2	1.05886	1.91871	0.999999
CPE	CPE	1.05479	1.39324	0.999999
ANKRD33B	ANKRD33B	1.05308	1.68677	0.999999
SH3KBP1	SH3KBP1	1.0521	1.59789	0.999999
LIMA1	LIMA1	1.03876	1.74503	0.999999
JUN	JUN	1.03606	1.53911	0.999999
PRSS23	PRSS23	1.03226	1.88634	0.999999
ASS1	ASS1	1.03142	1.3059	0.999999
CLDN1	CLDN1	1.02923	1.80827	0.999999
EFNB2	EFNB2	1.02524	1.46383	0.999999
PDE2A	PDE2A	1.01943	1.88527	0.999999
ITGA3	ITGA3	1.01212	1.87009	0.999999
CARD6	CARD6	1.01047	1.55963	0.999999
PITPNM3	PITPNM3	1.00752	1.39785	0.999999
QSOX1	QSOX1	1.00655	1.68563	0.999999
PAPPA	PAPPA	1.00443	1.86827	0.999999
GLP2R	GLP2R	-1.00403	1.41159	0.999999
ISG15	ISG15	-1.00782	1.5095	0.999999
TRABD2B	TRABD2B	-1.0214	1.38162	0.999999
KIAA0040	KIAA0040	-1.04047	1.3152	0.999999
KIAA1161	KIAA1161	-1.06375	1.60473	0.999999
BMF	BMF	-1.07347	1.34645	0.999999
DDX60	DDX60	-1.08458	1.55017	0.999999
HS6ST3	HS6ST3	-1.09704	1.70907	0.999999
SRPRB	SRPRB	-1.11273	1.67985	0.999999
EEF1A2	EEF1A2	-1.13371	1.86228	0.999999
FOXP2	FOXP2	-1.13598	1.36457	0.999999
LDLRAD4	LDLRAD4	-1.16651	1.44951	0.999999
ENO3	ENO3	-1.24582	1.75321	0.999999
SORBS2	SORBS2	-1.27287	1.77665	0.999999
KAZN	KAZN	-1.28472	1.58634	0.999999
SYT12	SYT12	-1.29229	2.06246	0.999999
SAMD11	SAMD11	-1.29979	2.01775	0.999999
TC2N	TC2N	-1.33475	1.32348	0.999999
MAP7D2	MAP7D2	-1.35119	1.39036	0.999999
NR2F1	NR2F1	-1.4008	2.13593	0.999999
OASL	OASL	-1.42011	1.56637	0.999999
CACNB4	CACNB4	-1.45843	1.57511	0.999999
LINC00602	LINC00602	-1.46753	1.87837	0.999999
HIST1H3C	HIST1H3C	-1.48308	1.51057	0.999999
COL14A1	COL14A1	-1.58763	2.05259	0.999999
ADRA2A	ADRA2A	-1.65143	1.5118	0.999999
S100A3	S100A3	-1.65185	1.4793	0.999999
PKDCC	PKDCC	-1.66534	1.56106	0.999999
STEAP4	STEAP4	-1.67284	1.47947	0.999999
KIF26A	KIF26A	-1.70426	1.97692	0.999999
PRRT2	PRRT2	-1.93198	1.40883	0.999999
NR4A3	NR4A3	-2.00729	1.47672	0.999999
PZP	PZP	-2.02521	1.53298	0.999999
VAV3	VAV3	-2.11584	2.12926	0.999999
FENDRR	FENDRR	-2.13484	1.62484	0.999999
SNCAIP	SNCAIP	-2.20645	1.74847	0.999999
UNC5D	UNC5D	-2.25836	1.59347	0.999999
FOXF1	FOXF1	-2.28035	1.93005	0.999999
KCNK3	KCNK3	-2.49947	2.17372	0.999999
AKR1C1	AKR1C1	-2.51175	1.96994	0.999999
CLDN4	CLDN4	-2.54934	2.21891	0.999999
PPP2R2C	PPP2R2C	-2.94084	1.79327	0.999999
VIPR2	VIPR2	-3.32192	1.35331	0.999999
GALNT13	GALNT13	-3.60732	1.43135	0.999999
STAC2	STAC2	-3.61961	2.45566	0.999999
CDH11	CDH11	-3.78135	1.35555	0.999999
ZNF521	ZNF521	-3.90688	1.70528	0.999999
AGBL1	AGBL1	-4.10328	1.89972	0.999999
CDH12	CDH12	-4.26052	1.77731	0.999999
C4BPB	C4BPB	-4.64385	2.75819	0.999999
TMPRSS15	TMPRSS15	-5.53135	1.78281	0.999999
MAPK4	MAPK4	-6.57189	1.31138	0.999999
PDX1-AS1	PDX1-AS1	-6.852	1.48933	0.999999

## Sheet: SRB KO vs. WT
name	description	log2FoldChange	pvalue	padj
EDA2R	EDA2R	7.65534	9.64259	6.2763e-09
MMP1	MMP1	7.33941	8.80049	3.97894e-08
XAF1	XAF1	7.17221	45.5608	5.65689e-44
CPXM1	CPXM1	6.99847	7.51467	6.40177e-07
KCND3	KCND3	6.93275	7.34907	9.16729e-07
CXCL10	CXCL10	6.73275	27.182	6.84459e-26
OAS2	OAS2	6.68351	205.968	3.80525e-203
C20orf195	C20orf195	6.64021	6.60103	4.50149e-06
RSAD2	RSAD2	6.38329	12.6523	8.73639e-12
IFI27	IFI27	6.21392	153.022	1.68233e-150
SH3RF3-AS1	SH3RF3-AS1	6.14208	5.30887	6.874e-05
MX2	MX2	6.12469	75.2019	3.00413e-73
BATF2	BATF2	5.81604	5.32026	6.71197e-05
LOC101927273	LOC101927273	5.71713	4.47426	0.000380088
TFAP2C	TFAP2C	5.71261	6.86176	2.56332e-06
SH3RF3	SH3RF3	5.57971	4.75771	0.000216316
IGFBP2	IGFBP2	5.55439	31.3111	6.1303e-30
MX1	MX1	5.47304	+∞	0
CMPK2	CMPK2	5.43228	11.4568	1.20955e-10
ZNF577	ZNF577	5.34392	3.73959	0.00166726
MDGA2	MDGA2	5.2762	3.58203	0.00230345
IFI6	IFI6	5.25917	+∞	0
LINC01111	LINC01111	5.23852	4.16571	0.000709411
PCDH9-AS2	PCDH9-AS2	5.21553	3.40736	0.00326376
PCDH9-AS4	PCDH9-AS4	5.17338	3.39962	0.00331464
CNTN5	CNTN5	5.16501	14.9601	5.25631e-14
TENM4	TENM4	5.1189	3.31635	0.00391222
WTAPP1	WTAPP1	5.10108	3.87318	0.00128457
IDO1	IDO1	5.08491	5.24519	7.84166e-05
POSTN	POSTN	5.05176	169.46	7.66216e-167
DCAF12L2	DCAF12L2	5.04691	3.20377	0.00490589
CPA3	CPA3	5.03994	16.2734	2.85684e-15
CXCL11	CXCL11	4.9477	13.2276	2.42544e-12
COL13A1	COL13A1	4.91778	2.93816	0.00819346
WASF3	WASF3	4.84817	39.6895	3.44467e-38
POTED	POTED	4.64919	2.49642	0.0193338
PCDH1	PCDH1	4.60849	43.0701	1.65439e-41
CAPN6	CAPN6	4.60318	20.8708	9.68587e-20
SUCNR1	SUCNR1	4.6028	3.00023	0.00728883
SPTA1	SPTA1	4.59031	2.45452	0.0208351
GAL3ST3	GAL3ST3	4.56559	4.06222	0.000873632
GPR98	GPR98	4.54308	25.6398	2.2039e-24
CCL20	CCL20	4.48667	3.95878	0.00107968
KIAA1456	KIAA1456	4.48514	7.24488	1.14409e-06
CHRDL1	CHRDL1	4.47273	24.1392	6.51937e-23
RGS9	RGS9	4.44063	2.22493	0.0320185
KCTD8	KCTD8	4.38559	2.11371	0.0397381
PDE9A	PDE9A	4.38549	1.9927	0.0496724
WDR86-AS1	WDR86-AS1	4.37388	2.13254	0.0383541
KCNMB1	KCNMB1	4.36503	8.27054	1.25084e-07
LINC01234	LINC01234	4.35817	9.68223	5.77368e-09
TRIM22	TRIM22	4.30712	62.1031	2.63313e-60
ZNF93	ZNF93	4.28786	10.8935	4.15696e-10
LOC441666	LOC441666	4.24769	2.53246	0.0180772
JAKMIP2-AS1	JAKMIP2-AS1	4.22127	2.48607	0.0197261
TMEM178B	TMEM178B	4.21187	3.42592	0.00315279
THSD7B	THSD7B	4.19311	1.89357	1
LMO2	LMO2	4.18665	4.72612	0.000230219
TRPV4	TRPV4	4.16335	1.84081	1
TMEM132B	TMEM132B	4.1515	1.84975	1
RTP4	RTP4	4.13421	2.37595	0.0242513
IL1RAPL1	IL1RAPL1	4.09086	3.23018	0.0046515
MAGED1	MAGED1	4.03831	23.2604	4.58199e-22
ZNF649	ZNF649	4.03764	3.06458	0.00640186
CDH5	CDH5	4.02612	11.6018	8.76539e-11
MEI4	MEI4	4.02597	1.6703	1
CEACAM22P	CEACAM22P	4.02412	1.70113	1
TSPAN7	TSPAN7	4.01712	1.86325	0.0632799
GPC4	GPC4	4.00593	4.22119	0.00063783
SERPINB2	SERPINB2	3.99304	5.22192	8.24757e-05
RYR2	RYR2	3.99261	92.6531	1.51253e-90
MPEG1	MPEG1	3.97517	1.62083	1
LOC101927139	LOC101927139	3.96356	17.5258	1.74585e-16
NLRP11	NLRP11	3.95906	1.56963	1
CERS4	CERS4	3.95225	1.59006	1
LINC00648	LINC00648	3.94725	2.94366	0.00811151
EBI3	EBI3	3.89633	6.11674	1.27339e-05
SDR16C5	SDR16C5	3.89251	50.5356	7.11434e-49
CHRM1	CHRM1	3.88832	2.85394	0.00971212
PCDH9-AS3	PCDH9-AS3	3.8824	2.03537	0.0458662
CCL5	CCL5	3.88138	26.5583	2.79551e-25
SPINK1	SPINK1	3.84942	1.4924	1
LOC101928495	LOC101928495	3.84684	1.44804	1
DCDC2	DCDC2	3.84684	1.44804	1
LTF	LTF	3.84652	2.68924	0.0134072
SMTNL1	SMTNL1	3.83207	1.44349	1
ZNF625	ZNF625	3.81478	1.94163	0.0547012
BMPR1B-AS1	BMPR1B-AS1	3.76986	1.40998	1
USP18	USP18	3.73836	66.7738	6.07884e-65
PSG8	PSG8	3.71152	1.35782	1
IL2RG	IL2RG	3.70734	1.80603	0.0701867
ITM2A	ITM2A	3.68635	1.80836	0.0699419
HELZ2	HELZ2	3.66453	36.2207	9.02099e-35
CHI3L1	CHI3L1	3.5884	1.65186	0.0927193
TRPC6	TRPC6	3.57801	6.02741	1.53811e-05
LINC00547	LINC00547	3.55825	1.64717	0.0933753
MIR5703	MIR5703	3.53889	2.57188	0.0168149
MIR4450	MIR4450	3.5251	2.19671	0.0338733
SERPINB3	SERPINB3	3.51825	1.53681	0.112807
IFITM1	IFITM1	3.50472	140.368	5.83805e-138
CCNYL2	CCNYL2	3.50083	14.5853	1.20029e-13
IL33	IL33	3.46315	3.04284	0.00668
RTN4RL1	RTN4RL1	3.44715	1.50741	0.11882
LINC00968	LINC00968	3.41142	6.99713	1.92138e-06
GYG2	GYG2	3.41046	3.75778	0.00161055
IFIT1	IFIT1	3.37297	182.302	1.26199e-179
LAMP3	LAMP3	3.3584	40.0294	1.60535e-38
UBE2L6	UBE2L6	3.34233	36.5617	4.14852e-35
UNC13A	UNC13A	3.29959	23.217	5.0406e-22
SEMA6B	SEMA6B	3.29897	9.78362	4.65187e-09
STAP2	STAP2	3.29316	17.1002	4.48799e-16
KCNE2	KCNE2	3.27922	1.37357	0.149931
2023-03-04	2023-03-04	3.26735	20.752	1.25775e-19
EFR3B	EFR3B	3.26696	5.20582	8.49317e-05
C2orf71	C2orf71	3.26448	1.89929	0.0591507
ITGB2	ITGB2	3.26374	13.3957	1.67016e-12
LOC100506422	LOC100506422	3.21708	1.31342	1
KIT	KIT	3.15773	2.37114	0.024466
PDE4B	PDE4B	3.14892	70.109	2.92915e-68
MEFV	MEFV	3.14332	9.9626	3.1615e-09
CD33	CD33	3.13468	16.127	3.94238e-15
FAM167A	FAM167A	3.12415	22.6682	1.72657e-21
PCDH17	PCDH17	3.11822	43.9539	2.23605e-42
PRICKLE2-AS3	PRICKLE2-AS3	3.1145	1.63889	0.0946406
CHRM4	CHRM4	3.0969	1.72528	0.0812085
LINC01204	LINC01204	3.09198	1.70908	0.0833676
GBP5	GBP5	3.06504	11.7591	6.16623e-11
SLC28A3	SLC28A3	3.03769	1.48341	0.123922
CNTNAP2	CNTNAP2	3.02967	1.54729	0.110955
IFI44L	IFI44L	3.02777	231.038	4.05597e-228
ANKRD30B	ANKRD30B	3.02717	11.4667	1.18444e-10
OAS1	OAS1	3.02648	162.252	1.1008e-159
IFIH1	IFIH1	3.01597	115.979	9.2769e-114
HTR7	HTR7	3.00209	5.10491	0.000103863
RGS7	RGS7	2.94554	2.08616	0.0417073
CLCA2	CLCA2	2.9439	1.51368	0.117535
IRF7	IRF7	2.94346	73.743	7.99456e-72
GALNT18	GALNT18	2.91789	14.8545	6.61455e-14
HERC6	HERC6	2.91672	135.638	2.91043e-133
CYP2G1P	CYP2G1P	2.89357	1.48243	0.124072
TET1	TET1	2.89134	19.1432	4.59399e-18
WNT6	WNT6	2.87782	2.48326	0.0198462
TNNT2	TNNT2	2.87347	4.01249	0.000967498
KLHL1	KLHL1	2.87184	21.823	1.15147e-20
SAMD9L	SAMD9L	2.8693	126.858	1.53396e-124
PARP10	PARP10	2.86663	22.3365	3.63988e-21
PTPRH	PTPRH	2.86621	5.33281	6.54673e-05
ADORA1	ADORA1	2.86373	4.04754	0.000900598
CST6	CST6	2.86286	1.41592	0.139123
SPARC	SPARC	2.85434	1.44317	0.132589
GBP1P1	GBP1P1	2.85038	1.37745	0.148867
CD163L1	CD163L1	2.85025	15.7822	8.4442e-15
SEMA5A	SEMA5A	2.84771	8.23515	1.35122e-07
DBX2	DBX2	2.84538	10.6987	6.35787e-10
DHX58	DHX58	2.83639	31.1358	9.11474e-30
ABCA8	ABCA8	2.82598	52.0905	2.05213e-50
FAM133A	FAM133A	2.82202	43.9361	2.30347e-42
KCNQ5-IT1	KCNQ5-IT1	2.81579	1.37709	0.148929
COL6A3	COL6A3	2.81551	2.83585	0.0100471
IGFBP5	IGFBP5	2.80206	63.1403	2.46315e-61
HBE1	HBE1	2.79147	1.30499	0.168333
SHC2	SHC2	2.79132	2.28491	0.0288364
RAMP1	RAMP1	2.77971	2.93126	0.00830789
TMEM71	TMEM71	2.77027	1.84124	0.0660071
LOC646736	LOC646736	2.75686	1.31834	0.164626
DHRS2	DHRS2	2.73882	4.4838	0.000372546
ACSM4	ACSM4	2.72941	2.22052	0.0322986
JAKMIP2	JAKMIP2	2.71841	5.46587	4.95261e-05
ANKRD45	ANKRD45	2.71804	2.13081	0.0384611
ACSS1	ACSS1	2.70827	2.67525	0.0137709
MIR3189	MIR3189	2.67826	1.98605	0.0502515
OAS3	OAS3	2.66474	257.048	5.27718e-254
TP53I11	TP53I11	2.66224	33.3951	5.52268e-32
ISG15	ISG15	2.65987	21.7898	1.23743e-20
ACTG2	ACTG2	2.65487	58.4647	1.06473e-56
TBX2	TBX2	2.64203	7.12259	1.47429e-06
PROM1	PROM1	2.64036	23.9024	1.10773e-22
VIT	VIT	2.61234	3.95881	0.00107968
APOE	APOE	2.60431	4.04243	0.000910217
GALNT6	GALNT6	2.60273	11.8004	5.6482e-11
UBA7	UBA7	2.59511	28.1618	7.47811e-27
KCNQ5	KCNQ5	2.59088	3.15106	0.00544959
THEMIS2	THEMIS2	2.55025	10.9163	3.96597e-10
DDX58	DDX58	2.53429	182.993	2.99398e-180
LOC100505817	LOC100505817	2.53256	4.26468	0.000583343
KCNS3	KCNS3	2.52879	10.728	5.96395e-10
GCNT4	GCNT4	2.52476	6.69006	3.71237e-06
PARP9	PARP9	2.52015	105.045	7.58973e-103
TNFSF10	TNFSF10	2.51387	6.86744	2.53446e-06
FAM65B	FAM65B	2.51231	1.8012	0.0707997
MOXD1	MOXD1	2.50687	5.71591	2.94162e-05
KRT75	KRT75	2.50379	4.12053	0.000778062
QPRT	QPRT	2.50133	39.1294	1.22761e-37
SULT1E1	SULT1E1	2.49203	20.7816	1.17964e-19
CELF2	CELF2	2.49158	57.507	9.49291e-56
DRGX	DRGX	2.49113	1.81138	0.0695133
LINGO3	LINGO3	2.4911	2.15861	0.0365774
LOC101929680	LOC101929680	2.48407	16.9064	6.92366e-16
SFTA1P	SFTA1P	2.47173	1.41306	0.13987
PTPN22	PTPN22	2.46324	2.39986	0.023179
NCCRP1	NCCRP1	2.45519	1.63187	0.0956476
HRK	HRK	2.45487	3.41886	0.00319805
IL1RN	IL1RN	2.45462	3.93742	0.00112674
SLC52A1	SLC52A1	2.45023	1.76313	0.0758242
INHBA	INHBA	2.44907	6.28576	8.91403e-06
GBP4	GBP4	2.44863	10.6296	7.37375e-10
RASGRF2-AS1	RASGRF2-AS1	2.44609	2.32463	0.0267786
PCDH9	PCDH9	2.44317	5.82604	2.34556e-05
TCF7L1	TCF7L1	2.43815	13.8478	6.14177e-13
SLITRK6	SLITRK6	2.43149	34.0791	1.1798e-32
LINC00665	LINC00665	2.39366	5.87476	2.12305e-05
LOC101928994	LOC101928994	2.39071	2.81984	0.0103438
LINC01356	LINC01356	2.38393	2.73171	0.0123645
SCN9A	SCN9A	2.37169	76.1484	3.59234e-74
PSG5	PSG5	2.37153	2.56272	0.0170767
GDF15	GDF15	2.3679	50.5324	7.11434e-49
ADAMTS20	ADAMTS20	2.36635	2.57626	0.0166759
ZNF516	ZNF516	2.36596	15.8535	7.21459e-15
OLFML2B	OLFML2B	2.36034	23.2842	4.35885e-22
SUGCT	SUGCT	2.3593	11.7646	6.10884e-11
RNF144B	RNF144B	2.35126	29.4476	4.12605e-28
PLAG1	PLAG1	2.34887	36.9128	1.88087e-35
KCNK6	KCNK6	2.34793	2.12079	0.039175
MIR5193	MIR5193	2.34781	1.6375	0.0948338
EHF	EHF	2.34374	16.7815	9.11941e-16
EDNRA	EDNRA	2.34249	57.3964	1.20383e-55
PTCHD4	PTCHD4	2.3416	19.411	2.52497e-18
FGF1	FGF1	2.33867	7.30529	1.00929e-06
PLSCR1	PLSCR1	2.33803	101.725	1.39016e-99
SHISA2	SHISA2	2.33697	4.22731	0.000630035
RRAD	RRAD	2.33269	4.66467	0.000259108
PARP14	PARP14	2.33178	144.298	8.10746e-142
IFI44	IFI44	2.32103	85.0289	5.70824e-83
NETO1	NETO1	2.31473	1.55929	0.108618
CLEC2B	CLEC2B	2.31463	4.3771	0.000462361
MIR424	MIR424	2.3002	1.7721	0.0744982
IFIT3	IFIT3	2.29799	80.8777	7.56461e-79
MYO1D	MYO1D	2.29329	4.32826	0.000511025
CMAHP	CMAHP	2.2872	2.08754	0.0416027
DNAH3	DNAH3	2.28008	2.39083	0.0236115
PDE1C	PDE1C	2.27486	3.47628	0.0028493
THBD	THBD	2.26475	24.8594	1.28728e-23
PSG4	PSG4	2.25814	5.18284	8.90746e-05
IRF9	IRF9	2.25055	82.1323	4.34934e-80
MAGEA3	MAGEA3	2.2423	27.1439	7.42973e-26
CPZ	CPZ	2.22181	9.95489	3.21289e-09
LHX8	LHX8	2.205	6.35064	7.79839e-06
TRIML2	TRIML2	2.20203	3.05557	0.00651411
ARHGAP6	ARHGAP6	2.19591	6.04173	1.49378e-05
ALPP	ALPP	2.1902	37.1991	9.90005e-36
MYEF2	MYEF2	2.17223	1.30443	0.168435
DUSP5	DUSP5	2.17062	41.9515	2.03956e-40
SENCR	SENCR	2.16788	8.50704	7.46933e-08
EFHD1	EFHD1	2.15902	9.22043	1.60649e-08
ESM1	ESM1	2.14524	2.36562	0.0247303
C19orf66	C19orf66	2.14405	55.8308	4.21377e-54
PSG1	PSG1	2.12935	3.97848	0.00103871
ADAMTS5	ADAMTS5	2.12337	29.9732	1.27168e-28
ZNF467	ZNF467	2.11134	2.51495	0.0186631
SCARA5	SCARA5	2.10992	4.69132	0.000245407
TGFA	TGFA	2.10401	38.0266	1.4858e-36
KLHDC7B	KLHDC7B	2.10395	1.69485	0.08561
HS3ST3A1	HS3ST3A1	2.10146	3.69517	0.00182512
VCAN	VCAN	2.10083	2.98029	0.00756946
FAM84B	FAM84B	2.09921	30.9965	1.24167e-29
CITED4	CITED4	2.08972	29.0267	1.05978e-27
GDA	GDA	2.0822	128.964	1.28019e-126
OLFML1	OLFML1	2.07422	2.18422	0.0346835
PGF	PGF	2.071	1.67994	0.0879263
LINC00565	LINC00565	2.06723	2.30758	0.0276388
FAT3	FAT3	2.06154	3.39214	0.00336272
AMTN	AMTN	2.05461	28.1225	8.13742e-27
ZNF833P	ZNF833P	2.04446	1.63808	0.0947511
IFIT5	IFIT5	2.04366	63.556	9.64377e-62
C1orf110	C1orf110	2.03596	4.05453	0.000888236
LINC01443	LINC01443	2.03535	2.23865	0.0312337
ANGPTL6	ANGPTL6	2.0262	19.9421	7.65807e-19
C20orf166	C20orf166	2.02449	1.4941	0.121532
HKDC1	HKDC1	2.02425	8.30261	1.16598e-07
SULF1	SULF1	2.00857	59.1299	2.34298e-57
LOC101928767	LOC101928767	2.0077	2.01915	0.0472095
FNDC1	FNDC1	2.00514	21.4577	2.59168e-20
TENM2	TENM2	1.99739	75.7017	9.76915e-74
PTX3	PTX3	1.9966	9.46097	9.35995e-09
ITGBL1	ITGBL1	1.99567	5.1772	8.99535e-05
IL6	IL6	1.9917	61.5518	9.19568e-60
DTX3L	DTX3L	1.99141	125.192	6.31108e-123
ANO2	ANO2	1.99091	9.10099	2.08675e-08
SAA1	SAA1	1.98654	14.9723	5.13891e-14
MRVI1	MRVI1	1.98484	4.20341	0.000658938
MDK	MDK	1.98164	31.645	2.90363e-30
LYPD6B	LYPD6B	1.97871	19.5846	1.71201e-18
NID1	NID1	1.97413	125.366	4.48202e-123
LRRC2	LRRC2	1.96903	9.51938	8.25793e-09
LINC01444	LINC01444	1.96772	3.3901	0.00337385
LINC00839	LINC00839	1.96313	16.1602	3.68566e-15
DOCK8	DOCK8	1.96119	4.58347	0.000303274
EDN1	EDN1	1.95132	37.0808	1.28853e-35
STAT1	STAT1	1.9489	124.533	2.73071e-122
NKAIN3	NKAIN3	1.94072	2.86965	0.00940831
SP110	SP110	1.93439	46.0477	1.91024e-44
APOL1	APOL1	1.93252	12.5959	9.90421e-12
PSG9	PSG9	1.92714	2.16927	0.0357932
S1PR1	S1PR1	1.92402	9.16656	1.81048e-08
PKIG	PKIG	1.91652	12.9246	4.81617e-12
PPAPDC1A	PPAPDC1A	1.91157	5.63988	3.44779e-05
SOCS2	SOCS2	1.91139	10.2162	1.81715e-09
WNT10A	WNT10A	1.904	1.63665	0.0949078
LINC00920	LINC00920	1.90264	1.368	0.151413
ANK1	ANK1	1.89895	16.0412	4.76159e-15
CCDC3	CCDC3	1.88877	16.2302	3.1465e-15
NTNG2	NTNG2	1.88398	1.58953	0.102869
NR2F2-AS1	NR2F2-AS1	1.87976	3.2421	0.00453776
PRICKLE1	PRICKLE1	1.87929	25.3432	4.27031e-24
CXCL8	CXCL8	1.87919	41.3897	7.35978e-40
NIPAL1	NIPAL1	1.87564	3.67522	0.00190311
MATK	MATK	1.87281	1.71954	0.0818996
MMP13	MMP13	1.8674	1.67072	0.0895501
PDZD2	PDZD2	1.86463	102.293	3.91573e-100
MFAP5	MFAP5	1.84901	47.5443	6.4774e-46
IGFBP1	IGFBP1	1.84871	6.07574	1.3877e-05
IFIT2	IFIT2	1.84585	54.8257	4.19517e-53
OASL	OASL	1.84539	46.1498	1.52834e-44
FAM26E	FAM26E	1.84289	2.57932	0.0165821
DKK 1.00	DKK 1.00	1.84085	16.9419	6.42184e-16
TNFRSF1B	TNFRSF1B	1.8397	3.77709	0.00154774
LOC101927911	LOC101927911	1.83707	5.99894	1.63178e-05
SAMHD1	SAMHD1	1.83523	98.5554	1.96993e-96
TMEM154	TMEM154	1.8352	20.0141	6.53804e-19
ANKRD1	ANKRD1	1.82056	50.1362	1.74735e-48
MIR503HG	MIR503HG	1.81136	9.82522	4.24732e-09
DDX60L	DDX60L	1.81035	78.5068	1.66917e-76
OLR1	OLR1	1.80879	52.3947	1.04851e-50
ODAM	ODAM	1.80666	1.54172	0.112012
DAPK1	DAPK1	1.80527	66.8342	5.39994e-65
CELF2-AS2	CELF2-AS2	1.80505	4.18942	0.000676093
SLC16A2	SLC16A2	1.80429	6.71581	3.50949e-06
ZNF285	ZNF285	1.80204	3.40592	0.00327152
CABS1	CABS1	1.79907	1.53211	0.113834
CHST2	CHST2	1.799	13.231	2.4121e-12
AQP2	AQP2	1.79588	2.21675	0.0325406
MDGA1	MDGA1	1.78799	2.41287	0.0226064
XDH	XDH	1.78226	2.0875	0.0416027
SVEP1	SVEP1	1.78075	23.376	3.54516e-22
GPR68	GPR68	1.77842	1.96821	0.0519027
GSDMC	GSDMC	1.77684	3.76917	0.00157213
CD5	CD5	1.76478	2.09042	0.041431
FLG-AS1	FLG-AS1	1.76008	1.34764	0.156586
SEMA6A-AS1	SEMA6A-AS1	1.75215	1.30422	0.168436
TLDC2	TLDC2	1.73951	30.8164	1.8624e-29
COL18A1-AS1	COL18A1-AS1	1.73106	1.54831	0.110733
SH3TC2	SH3TC2	1.7286	14.2048	2.76733e-13
RASSF2	RASSF2	1.72533	1.6174	0.0979119
KCNJ6	KCNJ6	1.72181	4.74196	0.000222742
IFI16	IFI16	1.71997	74.8522	6.37579e-73
ZNF711	ZNF711	1.71926	4.27596	0.000569427
TTC9	TTC9	1.71703	3.68844	0.00185172
LIPH	LIPH	1.71575	12.8303	5.89063e-12
IL4R	IL4R	1.71469	35.7698	2.52625e-34
ICAM1	ICAM1	1.71172	52.1514	1.80964e-50
DUSP6	DUSP6	1.71086	11.3175	1.65393e-10
TENM1	TENM1	1.70919	18.5777	1.65924e-17
GMPR	GMPR	1.69438	12.2164	2.27742e-11
ETNK2	ETNK2	1.69292	5.69431	3.07298e-05
MLPH	MLPH	1.69004	3.726	0.00171672
MMP14	MMP14	1.68807	28.0317	9.90812e-27
MCF2L2	MCF2L2	1.68391	4.87144	0.000170169
PGAM1P5	PGAM1P5	1.67969	7.63046	4.98019e-07
REC8	REC8	1.67874	25.5718	2.55005e-24
MEF2B	MEF2B	1.67739	4.40501	0.000436849
ITGB2-AS1	ITGB2-AS1	1.6773	4.10601	0.000799407
C14orf132	C14orf132	1.67074	18.7634	1.08953e-17
FLI1	FLI1	1.66095	26.7753	1.70601e-25
MATN2	MATN2	1.6585	18.4123	2.39419e-17
ANKRD33B	ANKRD33B	1.65713	75.1648	3.18599e-73
IGFBPL1	IGFBPL1	1.65662	6.25091	9.63073e-06
NGF	NGF	1.6561	9.57911	7.24154e-09
CPA4	CPA4	1.65323	91.0734	5.53473e-89
PRICKLE2-AS1	PRICKLE2-AS1	1.65236	3.58351	0.0022968
ANKRD2	ANKRD2	1.65228	1.32873	0.162019
SHISA3	SHISA3	1.65156	3.08967	0.0061092
DKK 3.00	DKK 3.00	1.65133	38.2389	9.36379e-37
COLGALT2	COLGALT2	1.6512	4.65405	0.000264094
RIN3	RIN3	1.6464	7.61559	5.12282e-07
IFI35	IFI35	1.6441	29.669	2.511e-28
SUSD2	SUSD2	1.64206	9.55247	7.67588e-09
DDX60	DDX60	1.64089	51.489	8.08297e-50
TMEM171	TMEM171	1.63918	2.35146	0.0254263
LOC101927318	LOC101927318	1.63371	3.18051	0.00514609
STON1	STON1	1.63172	4.17727	0.000694252
TXNIP	TXNIP	1.62759	40.339	8.02564e-39
ARRDC4	ARRDC4	1.6215	8.99205	2.62696e-08
LOC100129434	LOC100129434	1.62135	1.54416	0.1116
DSC3	DSC3	1.62059	53.8453	3.88713e-52
HERC5	HERC5	1.61672	49.2957	1.17857e-47
ALPK2	ALPK2	1.61312	57.1129	2.27392e-55
KC6	KC6	1.60927	2.59863	0.0159749
GPRC5B	GPRC5B	1.60921	32.5036	4.20407e-31
PDGFB	PDGFB	1.60498	22.2658	4.24524e-21
MYLK	MYLK	1.60372	29.8495	1.67928e-28
KANK4	KANK4	1.59851	6.25109	9.63073e-06
ANKRD20A12P	ANKRD20A12P	1.59469	2.16829	0.0358395
CEL	CEL	1.59024	1.64512	0.0936405
SLC43A1	SLC43A1	1.58782	4.12909	0.000764196
SMCO2	SMCO2	1.58618	1.53606	0.112978
CDH3	CDH3	1.58557	4.6399	0.000271381
FLG	FLG	1.58388	5.16823	9.14801e-05
PLEKHA4	PLEKHA4	1.58049	4.19845	0.000664834
WNT5B	WNT5B	1.57627	6.23678	9.91081e-06
DDI1	DDI1	1.57523	1.63584	0.0950191
MTVR2	MTVR2	1.57129	2.46445	0.0205156
SLIT2-IT1	SLIT2-IT1	1.56962	1.62566	0.0966659
TRIM21	TRIM21	1.56791	42.8724	2.58033e-41
EPAS1	EPAS1	1.56694	85.4872	2.05803e-83
ARHGAP20	ARHGAP20	1.55969	9.65377	6.13589e-09
PLXDC1	PLXDC1	1.55861	1.30265	0.168949
KCNMA1	KCNMA1	1.5565	6.79075	2.98093e-06
PRKG1-AS1	PRKG1-AS1	1.55525	1.32758	0.162197
IL17RE	IL17RE	1.5539	1.444	0.132475
TSPAN11	TSPAN11	1.55266	9.09908	2.09282e-08
HDAC9	HDAC9	1.55155	17.5454	1.6798e-16
FAM101B	FAM101B	1.55152	39.3005	8.35679e-38
CHRNA9	CHRNA9	1.55006	5.4217	5.43015e-05
STXBP6	STXBP6	1.54994	4.15758	0.000721135
FGF5	FGF5	1.54899	3.63988	0.00204986
LIPG	LIPG	1.54673	9.68701	5.71949e-09
HOTS	HOTS	1.54201	1.36986	0.150855
STAT2	STAT2	1.53593	71.3009	2.01123e-69
PRKCH	PRKCH	1.52729	21.6224	1.79617e-20
GRAMD1C	GRAMD1C	1.52475	1.7409	0.0788877
NTN1	NTN1	1.52331	4.09574	0.000815713
TRIM34	TRIM34	1.52303	10.1997	1.88381e-09
CAMK2N1	CAMK2N1	1.52252	5.07483	0.000110568
TMEM52B	TMEM52B	1.51959	6.65496	4.0084e-06
ZNF662	ZNF662	1.50583	3.06737	0.00636353
EIF2AK2	EIF2AK2	1.49717	42.8028	2.99602e-41
RARRES3	RARRES3	1.49124	2.16851	0.0358318
MYH3	MYH3	1.48754	2.64543	0.0145725
CRISPLD1	CRISPLD1	1.48633	24.095	7.17995e-23
TMEFF2	TMEFF2	1.48553	3.32632	0.00382866
ZNF804A	ZNF804A	1.48535	10.8274	4.79609e-10
TRIB2	TRIB2	1.48477	5.35576	6.22461e-05
SYNGR1	SYNGR1	1.48464	1.97762	0.0509979
RNF125	RNF125	1.48421	3.60923	0.00218427
ANKRD20A5P	ANKRD20A5P	1.48118	1.54381	0.111665
DIRC3	DIRC3	1.47883	1.33375	0.160598
MGAT5B	MGAT5B	1.47786	16.4965	1.72511e-15
CATSPER1	CATSPER1	1.4684	7.29744	1.02533e-06
KIF5C	KIF5C	1.46229	10.3292	1.42695e-09
C20orf166-AS1	C20orf166-AS1	1.45885	1.76207	0.0759174
SORCS2	SORCS2	1.45414	6.58771	4.62764e-06
TUBA8	TUBA8	1.45336	2.86567	0.00949114
TEX36	TEX36	1.45091	3.91725	0.00117175
DUSP4	DUSP4	1.45043	38.1141	1.23689e-36
APOL6	APOL6	1.44552	27.6669	2.26803e-26
C5orf46	C5orf46	1.43915	11.6216	8.39087e-11
UBE2QL1	UBE2QL1	1.42943	3.36123	0.00357726
EMR1	EMR1	1.42837	2.25564	0.0303045
MPP4	MPP4	1.42836	2.74653	0.0119958
CHST7	CHST7	1.42546	4.72393	0.000231062
FAM129A	FAM129A	1.42495	40.312	8.45706e-39
LOC101927905	LOC101927905	1.42088	2.03761	0.0457071
RGMB-AS1	RGMB-AS1	1.41878	2.29287	0.0284109
ARHGDIB	ARHGDIB	1.41356	14.9569	5.28051e-14
NTN4	NTN4	1.40725	60.6669	6.92755e-59
CHST6	CHST6	1.40691	1.56357	0.107794
ASS1	ASS1	1.40629	16.0764	4.40359e-15
NOS1AP	NOS1AP	1.40189	8.78048	4.13135e-08
CD274	CD274	1.40068	3.78417	0.00152512
SCARF2	SCARF2	1.39649	7.12103	1.47796e-06
AADACP1	AADACP1	1.3951	1.41883	0.138563
TRPC4	TRPC4	1.39452	31.4608	4.40563e-30
KCNJ15	KCNJ15	1.39447	2.5328	0.0180714
FGF18	FGF18	1.39287	1.69855	0.0850276
ISG20	ISG20	1.39263	5.96346	1.75919e-05
TRANK1	TRANK1	1.38788	47.3438	1.00212e-45
IL24	IL24	1.38453	3.83584	0.00137935
ZNF618	ZNF618	1.38022	34.4009	5.7145e-33
CCDC68	CCDC68	1.3765	13.9162	5.29854e-13
IFITM3	IFITM3	1.36861	56.9064	3.59839e-55
SP100	SP100	1.36443	42.0649	1.60393e-40
SPINT2	SPINT2	1.35617	6.62211	4.30134e-06
PTGFR	PTGFR	1.34804	4.53896	0.00033259
PHF11	PHF11	1.34653	16.607	1.34575e-15
COL18A1	COL18A1	1.34544	14.5391	1.32815e-13
ARMCX1	ARMCX1	1.34283	11.0803	2.76458e-10
SLFN5	SLFN5	1.34028	44.1224	1.53443e-42
SLC15A3	SLC15A3	1.33904	10.0714	2.48112e-09
LINC01391	LINC01391	1.33361	2.04026	0.0454806
PRICKLE2	PRICKLE2	1.33286	5.17599	9.00677e-05
GPNMB	GPNMB	1.3325	12.1126	2.85039e-11
VWF	VWF	1.3319	1.65161	0.0927504
PLA2G4C	PLA2G4C	1.3308	3.0124	0.00711752
LOC101929319	LOC101929319	1.33057	1.68476	0.0871641
INSL4	INSL4	1.33017	2.09302	0.0412667
SCG5	SCG5	1.32815	11.1374	2.4422e-10
AQP5	AQP5	1.31916	2.05694	0.0440775
HAPLN3	HAPLN3	1.31766	4.96131	0.000140776
RASGRP3	RASGRP3	1.31762	7.62987	4.98089e-07
FIBIN	FIBIN	1.31439	2.78746	0.0110762
NRXN3	NRXN3	1.31361	11.1917	2.16769e-10
SLC2A3	SLC2A3	1.31225	17.4933	1.85711e-16
APOBEC3C	APOBEC3C	1.31153	2.08953	0.041479
SERPINB7	SERPINB7	1.3086	2.11412	0.0397235
TUBB4A	TUBB4A	1.30684	3.34616	0.00367627
GBP3	GBP3	1.30682	23.5306	2.49479e-22
SERTAD4	SERTAD4	1.30672	12.9033	5.04769e-12
HNF4G	HNF4G	1.30648	2.63935	0.0147565
LOC729732	LOC729732	1.30442	1.3828	0.147546
BGN	BGN	1.3031	5.68557	3.13007e-05
2023-09-04	2023-09-04	1.29964	1.45835	0.129464
MPZL2	MPZL2	1.29785	5.33084	6.57124e-05
FOLR1	FOLR1	1.29482	40.9114	2.19191e-39
PCDHB15	PCDHB15	1.2948	1.71263	0.0828916
DIO2-AS1	DIO2-AS1	1.29478	8.22977	1.36446e-07
LOC339874	LOC339874	1.29365	1.30947	0.167245
CHGA	CHGA	1.2919	2.14592	0.0374763
FST	FST	1.29078	8.38941	9.6627e-08
PTGER1	PTGER1	1.28505	1.62935	0.0960608
ZFHX2	ZFHX2	1.28271	3.22899	0.00466215
AMZ1	AMZ1	1.28052	4.58882	0.00030003
FLJ32255	FLJ32255	1.28034	13.7481	7.59722e-13
TMEM156	TMEM156	1.27789	10.6321	7.34438e-10
F2R	F2R	1.2776	28.2766	5.77653e-27
CTSS	CTSS	1.27486	20.3623	3.00099e-19
CCIN	CCIN	1.27364	2.82688	0.0102149
TRIM6-TRIM34	TRIM6-TRIM34	1.27334	10.1667	2.02564e-09
KCNJ18	KCNJ18	1.27175	17.2793	3.00044e-16
ZNF114	ZNF114	1.26989	1.78261	0.0731542
MIR6827	MIR6827	1.26647	1.55268	0.10978
KCNJ12	KCNJ12	1.26489	24.7294	1.72743e-23
FOXO1	FOXO1	1.26422	15.0135	4.68656e-14
LOC101927843	LOC101927843	1.2641	3.0383	0.00674455
BMP4	BMP4	1.26125	22.4181	3.02969e-21
MIR3606	MIR3606	1.26095	5.55898	4.09112e-05
CDSN	CDSN	1.25518	1.93279	0.0555709
MIR1291	MIR1291	1.2532	1.53786	0.11263
RBM24	RBM24	1.25294	4.24978	0.000601983
IL31RA	IL31RA	1.24969	2.34022	0.026034
PLEKHA7	PLEKHA7	1.24951	17.1619	3.90619e-16
ZNF488	ZNF488	1.24751	3.78857	0.00151373
WFDC1	WFDC1	1.24282	21.5458	2.12449e-20
MKRN9P	MKRN9P	1.23715	2.55563	0.0173086
TMEM92	TMEM92	1.23714	3.9061	0.00119909
FHOD3	FHOD3	1.23531	32.3552	5.82765e-31
DTX4	DTX4	1.23288	13.1262	3.04901e-12
PLAT	PLAT	1.22252	8.11667	1.75202e-07
SNORA34	SNORA34	1.22087	1.49147	0.122168
MIR6084	MIR6084	1.21777	7.28933	1.04226e-06
SAA2	SAA2	1.21769	3.42643	0.00315176
PRKG1	PRKG1	1.21739	5.00862	0.000127453
RXFP1	RXFP1	1.21551	1.61412	0.0984791
LOC100506990	LOC100506990	1.2096	3.14918	0.00546791
ICOSLG	ICOSLG	1.20816	6.29568	8.72971e-06
LOXL2	LOXL2	1.20495	41.9764	1.94612e-40
NYAP2	NYAP2	1.20362	26.0244	9.29269e-25
CCDC85A	CCDC85A	1.1999	5.08535	0.000108067
PTPRD	PTPRD	1.19978	17.7844	9.85298e-17
NUPR1	NUPR1	1.19926	17.5539	1.65308e-16
AIM1L	AIM1L	1.19873	1.55974	0.108529
LOC100506178	LOC100506178	1.19552	1.74538	0.078194
SPRY4	SPRY4	1.19362	2.51987	0.0185016
MAOA	MAOA	1.19226	8.78804	4.07724e-08
SNX29P1	SNX29P1	1.19022	1.63535	0.0950827
IKZF2	IKZF2	1.18433	22.5382	2.31882e-21
RHEBL1	RHEBL1	1.18083	2.65053	0.0144338
SERTAD4-AS1	SERTAD4-AS1	1.17951	3.93705	0.00112694
LHX9	LHX9	1.17938	12.1825	2.45021e-11
MUC7	MUC7	1.1779	1.68851	0.0866411
SPRY1	SPRY1	1.17627	3.81715	0.00142859
CYB5R2	CYB5R2	1.17576	4.41879	0.000425601
HSH2D	HSH2D	1.17465	2.6532	0.0143667
INSR	INSR	1.17362	16.4937	1.73065e-15
DRAM1	DRAM1	1.17211	38.0741	1.34408e-36
SLIT2	SLIT2	1.16942	19.1659	4.37502e-18
TMEM200A	TMEM200A	1.16619	1.44256	0.132748
SRPX	SRPX	1.16503	6.76533	3.15081e-06
LPHN1	LPHN1	1.16367	14.3907	1.83597e-13
ACOT1	ACOT1	1.16344	3.46075	0.00293887
IL23A	IL23A	1.16116	1.39957	0.143336
CHRNB2	CHRNB2	1.15901	5.50414	4.56155e-05
NT5E	NT5E	1.15874	20.1281	5.10587e-19
ALOX12P2	ALOX12P2	1.15759	1.30542	0.168264
FAM132B	FAM132B	1.15514	4.01183	0.00096842
KCNQ4	KCNQ4	1.15475	1.43187	0.135326
PARP12	PARP12	1.15457	28.109	8.34414e-27
MAOB	MAOB	1.15421	5.53707	4.28481e-05
PTPRQ	PTPRQ	1.15223	5.77568	2.60388e-05
SDPR	SDPR	1.14774	9.11608	2.0215e-08
THRB-AS1	THRB-AS1	1.14341	1.5416	0.112012
KRT81	KRT81	1.14177	2.92262	0.00844452
DISC2	DISC2	1.14107	1.66481	0.0905058
TDRD7	TDRD7	1.14087	21.9862	7.94204e-21
FIBCD1	FIBCD1	1.13549	3.22613	0.00468875
COL5A2	COL5A2	1.13518	6.20559	1.05166e-05
COL3A1	COL3A1	1.12924	26.3622	4.34146e-25
SLC16A6	SLC16A6	1.12801	7.7382	3.94289e-07
ADM2	ADM2	1.1269	3.58886	0.00227318
ADM	ADM	1.12668	20.407	2.71802e-19
TMCC3	TMCC3	1.12048	3.69929	0.00180927
RAB27B	RAB27B	1.12037	14.498	1.44887e-13
MAGEA12	MAGEA12	1.11939	1.31326	0.166145
CD177	CD177	1.11744	4.07735	0.000847591
DIO2	DIO2	1.11737	28.6024	2.77999e-27
LPAR1	LPAR1	1.1121	12.8647	5.49183e-12
CYP39A1	CYP39A1	1.1119	4.72167	0.000231789
BST2	BST2	1.11179	29.6214	2.78345e-28
F2RL1	F2RL1	1.11103	5.14696	9.5409e-05
STON1-GTF2A1L	STON1-GTF2A1L	1.11026	1.34035	0.158679
SAMD9	SAMD9	1.11	26.7889	1.66304e-25
LAP3	LAP3	1.1064	30.044	1.08769e-28
PRDM8	PRDM8	1.10563	2.65539	0.0143048
SLCO4A1-AS1	SLCO4A1-AS1	1.1052	11.6776	7.39018e-11
PML	PML	1.10448	23.8091	1.36612e-22
TMPRSS3	TMPRSS3	1.10285	12.4658	1.32476e-11
RSPO3	RSPO3	1.10067	10.5758	8.27396e-10
GRHL1	GRHL1	1.09996	1.7782	0.0736883
HS3ST5	HS3ST5	1.09706	2.13279	0.0383425
NOX4	NOX4	1.0897	4.29817	0.00054467
SALL2	SALL2	1.0889	2.25116	0.0305294
FSD1	FSD1	1.08761	9.77293	4.76027e-09
MME	MME	1.08516	1.46338	0.128404
MMP15	MMP15	1.08137	10.8357	4.71321e-10
EFEMP1	EFEMP1	1.08112	31.682	2.6858e-30
IL12A	IL12A	1.07721	1.48858	0.122848
ARL4C	ARL4C	1.07692	8.03903	2.0735e-07
JPH3	JPH3	1.07462	9.02106	2.47524e-08
SPRED3	SPRED3	1.07438	1.92741	0.056157
AGTR1	AGTR1	1.07429	1.57307	0.105934
LOC100507373	LOC100507373	1.07303	3.94382	0.00111319
TRIM25	TRIM25	1.07144	49.5464	6.70434e-48
PAX8-AS1	PAX8-AS1	1.07113	5.22389	8.22304e-05
LOC100419583	LOC100419583	1.07073	15.4165	1.89936e-14
CAPN5	CAPN5	1.07006	3.11091	0.00587939
MIR2682	MIR2682	1.06844	1.60044	0.100932
SLC25A34	SLC25A34	1.06684	2.22479	0.0320185
CHCHD7	CHCHD7	1.06509	14.8954	6.03493e-14
PDGFD	PDGFD	1.06365	8.64796	5.52749e-08
IL17RD	IL17RD	1.06325	4.26822	0.000579306
C1orf226	C1orf226	1.06288	4.9061	0.000158019
TLR2	TLR2	1.06241	1.80618	0.0701867
SPIN2A	SPIN2A	1.05936	2.05384	0.0443059
PRRX2	PRRX2	1.05885	5.16702	9.15281e-05
IGFBP3	IGFBP3	1.05758	34.1617	9.83312e-33
PPM1K	PPM1K	1.05648	19.7396	1.20708e-18
FN1	FN1	1.05588	54.813	4.25255e-53
SH2D5	SH2D5	1.05476	5.21616	8.32539e-05
CASP1	CASP1	1.05284	3.80302	0.00146883
RAB3B	RAB3B	1.05065	20.4846	2.29125e-19
ABCA10	ABCA10	1.05007	2.72343	0.0125468
SHROOM2	SHROOM2	1.04892	4.44838	0.000400608
NID2	NID2	1.04846	19.1975	4.08275e-18
SLCO4A1	SLCO4A1	1.04764	24.026	8.37491e-23
IL7	IL7	1.04752	5.35861	6.18921e-05
ADORA2A	ADORA2A	1.04717	2.1499	0.0371682
LBH	LBH	1.04696	29.2961	5.81064e-28
FRMD6	FRMD6	1.04629	31.4456	4.52996e-30
GCA	GCA	1.04291	2.60426	0.0158185
ITGA2	ITGA2	1.04125	17.401	2.27442e-16
LOC100507156	LOC100507156	1.04084	10.6733	6.71589e-10
SHANK3	SHANK3	1.03794	9.02698	2.44533e-08
SLC9A2	SLC9A2	1.03753	12.6037	9.7491e-12
PDLIM1	PDLIM1	1.03689	24.2294	5.35095e-23
GBGT1	GBGT1	1.03602	1.36017	0.153315
SOCS1	SOCS1	1.03518	1.9733	0.0514239
XKRX	XKRX	1.03364	1.71763	0.0821016
PTGER2	PTGER2	1.03115	3.86376	0.00130746
RIMS3	RIMS3	1.03065	1.58991	0.102801
GAS6	GAS6	1.02845	14.2294	2.62798e-13
VTN	VTN	1.02758	3.07136	0.00631324
EPB41L5	EPB41L5	1.02658	14.7376	8.56419e-14
CCDC71L	CCDC71L	1.0262	11.7588	6.16623e-11
ANKRD29	ANKRD29	1.02615	4.73942	0.000223794
ANGPTL2	ANGPTL2	1.02341	2.38112	0.0240193
AOX1	AOX1	1.02249	23.8001	1.38806e-22
VWA5A	VWA5A	1.01852	6.74888	3.26229e-06
HES2	HES2	1.01683	1.44099	0.133037
IL27RA	IL27RA	1.01609	6.68407	3.75626e-06
TRIM14	TRIM14	1.0126	34.7836	2.38698e-33
CETP	CETP	1.01096	1.81633	0.0689164
BTC	BTC	1.01075	1.58674	0.103344
VGLL3	VGLL3	1.00976	23.1543	5.76909e-22
PAQR5	PAQR5	1.00783	17.9638	6.58564e-17
ITPK1	ITPK1	1.00744	32.1452	9.38118e-31
ALS2CL	ALS2CL	1.00684	13.9206	5.25808e-13
THRB	THRB	1.00646	16.1444	3.81056e-15
HS3ST1	HS3ST1	1.00497	1.37342	0.149953
DUSP10	DUSP10	1.0039	10.8971	4.12972e-10
IL7R	IL7R	1.00278	25.9585	1.0756e-24
C1R	C1R	1.00265	19.1299	4.71911e-18
RAB43	RAB43	1.00254	4.70074	0.000240738
TRIM8	TRIM8	1.00218	20.8356	1.04598e-19
DCN	DCN	-1.0005	1.51572	0.117161
AQP3	AQP3	-1.00284	27.7368	1.94212e-26
TNS4	TNS4	-1.00923	28.4251	4.15526e-27
WNT7B	WNT7B	-1.01822	30.0614	1.05219e-28
PHYHIP	PHYHIP	-1.01987	2.59094	0.016208
LMO1	LMO1	-1.02299	10.7655	5.48017e-10
SMARCD3	SMARCD3	-1.02592	8.64456	5.55559e-08
MIR630	MIR630	-1.02726	1.41132	0.140288
SRPRB	SRPRB	-1.0286	23.732	1.61544e-22
CCDC74A	CCDC74A	-1.03097	1.6946	0.0856281
LDLRAD4	LDLRAD4	-1.03289	23.5831	2.24322e-22
BRSK1	BRSK1	-1.03577	1.8546	0.0642511
CYP24A1	CYP24A1	-1.03675	3.47655	0.0028493
PCDHGC3	PCDHGC3	-1.03802	5.30586	6.9164e-05
LINC00313	LINC00313	-1.04296	4.89987	0.000160071
RPS6KA2-IT1	RPS6KA2-IT1	-1.04342	7.18871	1.28456e-06
LOC100129203	LOC100129203	-1.0461	2.95011	0.00802607
IRX5	IRX5	-1.04721	3.39169	0.00336465
EPHA1	EPHA1	-1.04962	2.15123	0.0371065
ADAMTS8	ADAMTS8	-1.05274	4.14012	0.000748084
DLX2	DLX2	-1.05442	13.8894	5.62252e-13
PCOLCE-AS1	PCOLCE-AS1	-1.05516	4.42139	0.000423332
LOC102546294	LOC102546294	-1.05804	10.471	1.04207e-09
FBXO24	FBXO24	-1.0634	2.25254	0.0304748
TSTD1	TSTD1	-1.06384	3.45483	0.00297351
C5	C5	-1.06689	3.37537	0.00347233
KIAA1161	KIAA1161	-1.06938	32.0135	1.26114e-30
CMYA5	CMYA5	-1.07717	5.45661	5.04754e-05
CPS1	CPS1	-1.0804	46.9717	2.33166e-45
CYFIP2	CYFIP2	-1.08062	19.9612	7.35695e-19
MAMDC2	MAMDC2	-1.08427	14.0784	3.68332e-13
ICAM2	ICAM2	-1.08771	5.61172	3.65695e-05
SNCG	SNCG	-1.09457	12.4028	1.52481e-11
THOC7-AS1	THOC7-AS1	-1.09523	2.36712	0.0246615
TSPAN33	TSPAN33	-1.09899	1.55398	0.109539
SNORD70	SNORD70	-1.10052	2.4137	0.0225706
HIST1H3C	HIST1H3C	-1.10352	12.0155	3.53485e-11
BEGAIN	BEGAIN	-1.10823	16.0191	4.98045e-15
NR4A1	NR4A1	-1.10842	19.4429	2.35482e-18
LOC101928794	LOC101928794	-1.11031	1.703	0.0843222
RHBDL3	RHBDL3	-1.11368	3.04823	0.00660586
GALNT12	GALNT12	-1.1213	1.30233	0.16904
CYP1A1	CYP1A1	-1.12442	2.10881	0.0401061
PDE4D	PDE4D	-1.1246	38.8249	2.45218e-37
TRPM3	TRPM3	-1.1346	4.42903	0.000417002
GPR56	GPR56	-1.13549	32.6017	3.40577e-31
LOC102724596	LOC102724596	-1.1391	1.73531	0.0796947
SPOCK3	SPOCK3	-1.13942	3.86402	0.00130738
PKI55	PKI55	-1.13945	15.6761	1.06878e-14
VIPR2	VIPR2	-1.14068	3.07339	0.00628906
MIR4722	MIR4722	-1.14195	1.74271	0.0786381
RAP1GAP	RAP1GAP	-1.14227	6.58842	4.62471e-06
DPY19L2P2	DPY19L2P2	-1.15004	10.6417	7.19732e-10
LINC00987	LINC00987	-1.15008	2.09648	0.0409994
EEF1A2	EEF1A2	-1.15297	29.2282	6.74942e-28
PLA2G4A	PLA2G4A	-1.15323	33.5271	4.13948e-32
MAP1A	MAP1A	-1.15983	6.6117	4.40124e-06
PLD1	PLD1	-1.1616	24.4243	3.43373e-23
CUBN	CUBN	-1.16805	1.71275	0.0828916
TTYH2	TTYH2	-1.18103	2.19947	0.0337113
GLIS1	GLIS1	-1.18582	9.59316	7.02198e-09
DHRS3	DHRS3	-1.18593	25.1786	6.20514e-24
RASGRP1	RASGRP1	-1.19036	14.2116	2.73126e-13
KAZN	KAZN	-1.19081	19.7943	1.06828e-18
IGFN1	IGFN1	-1.19918	21.1078	5.68098e-20
ARHGAP4	ARHGAP4	-1.21045	1.39449	0.14456
ROBO2	ROBO2	-1.21278	1.9174	0.0571872
LDLRAD4-AS1	LDLRAD4-AS1	-1.22601	4.38765	0.000453522
SCARNA3	SCARNA3	-1.22715	1.87924	0.0613933
CLMN	CLMN	-1.23773	3.82408	0.00141194
TCEA3	TCEA3	-1.2409	2.70913	0.0129089
FOXF1	FOXF1	-1.25419	10.2442	1.71789e-09
KCNQ1	KCNQ1	-1.26374	1.44972	0.131232
MAMDC2-AS1	MAMDC2-AS1	-1.26469	2.04762	0.0448303
TRIM4	TRIM4	-1.26688	12.7092	7.69851e-12
ISLR	ISLR	-1.27234	2.4635	0.020535
KCNK3	KCNK3	-1.28436	10.774	5.40317e-10
ASIC3	ASIC3	-1.28437	2.97689	0.00761359
LINC01140	LINC01140	-1.287	1.6878	0.0867153
MIR5190	MIR5190	-1.29258	1.48627	0.123346
HPGD	HPGD	-1.2954	3.28505	0.00416636
PHYHIPL	PHYHIPL	-1.29573	3.59619	0.00224299
PART1	PART1	-1.29775	4.1632	0.000712271
ADAM20P1	ADAM20P1	-1.2991	1.39214	0.145199
PTPN6	PTPN6	-1.30077	1.65513	0.0921925
FOS	FOS	-1.30211	2.69302	0.0133172
STRA6	STRA6	-1.30286	16.9215	6.7091e-16
LOC100506136	LOC100506136	-1.31738	3.37632	0.00346638
DLX6	DLX6	-1.31915	4.4704	0.000382506
S100A3	S100A3	-1.32413	16.1286	3.94011e-15
CNR1	CNR1	-1.32715	4.7092	0.000237066
CPS1-IT1	CPS1-IT1	-1.32747	7.8956	2.82339e-07
DLX6-AS1	DLX6-AS1	-1.36401	2.1678	0.0358689
RNF224	RNF224	-1.36744	5.32505	6.65422e-05
MYO1G	MYO1G	-1.37181	2.61193	0.0155777
IFNA1	IFNA1	-1.38002	1.85774	0.0639213
SLCO1C1	SLCO1C1	-1.38623	23.6549	1.91051e-22
C7orf13	C7orf13	-1.39141	1.54138	0.112019
PRRT2	PRRT2	-1.39227	12.2679	2.0488e-11
FAM13C	FAM13C	-1.39539	10.366	1.32013e-09
RPL13AP3	RPL13AP3	-1.39937	1.31599	0.165329
TAS2R5	TAS2R5	-1.40229	1.39718	0.143813
HYKK	HYKK	-1.41378	3.17261	0.00522448
DOCK2	DOCK2	-1.41404	13.6799	8.82466e-13
RPRM	RPRM	-1.41883	4.75165	0.000218719
ABCG1	ABCG1	-1.42328	5.69894	3.04824e-05
SRRM4	SRRM4	-1.42512	2.11617	0.0395607
FIGF	FIGF	-1.42994	2.26529	0.0298135
NR4A3	NR4A3	-1.43614	25.3762	3.97882e-24
LOC101927934	LOC101927934	-1.4468	1.80717	0.0700815
HEATR9	HEATR9	-1.44714	2.24443	0.030887
GALNT14	GALNT14	-1.45104	3.9776	0.00104024
TNFRSF8	TNFRSF8	-1.45155	1.39954	0.143336
PRDM6	PRDM6	-1.4552	8.1869	1.49817e-07
ANXA10	ANXA10	-1.45602	11.9801	3.82737e-11
NCAM2	NCAM2	-1.46081	8.66937	5.27635e-08
CYSRT1	CYSRT1	-1.4617	20.4244	2.62163e-19
ETNPPL	ETNPPL	-1.46406	2.54068	0.0177962
FENDRR	FENDRR	-1.46498	9.1233	1.99112e-08
LINC00689	LINC00689	-1.47028	5.16731	9.15281e-05
MIR325HG	MIR325HG	-1.47493	1.55491	0.109365
LOC100130417	LOC100130417	-1.47734	5.92531	1.90692e-05
VAV3	VAV3	-1.48497	20.0479	6.09479e-19
MIR1913	MIR1913	-1.48558	1.43471	0.134554
SORBS2	SORBS2	-1.50006	28.4178	4.19928e-27
BMF	BMF	-1.52734	36.8367	2.22184e-35
MAP7D2	MAP7D2	-1.52982	17.9151	7.34236e-17
CHN2	CHN2	-1.5303	2.92303	0.00843995
HS6ST3	HS6ST3	-1.53647	53.2445	1.52675e-51
AUTS2	AUTS2	-1.53785	17.5303	1.73377e-16
LINC01411	LINC01411	-1.54431	15.2193	2.95093e-14
CLDN11	CLDN11	-1.54473	5.83529	2.30228e-05
ERVMER34-1	ERVMER34-1	-1.545	4.1074	0.000798235
EGFL8	EGFL8	-1.54891	1.60774	0.0995899
EVPLL	EVPLL	-1.54969	3.06232	0.00643249
CREG2	CREG2	-1.55596	10.1538	2.08364e-09
ZNF528	ZNF528	-1.56504	3.02992	0.00686738
COL25A1	COL25A1	-1.56878	72.3347	1.94947e-70
C2orf66	C2orf66	-1.57796	1.43518	0.134438
PALD1	PALD1	-1.58018	5.6741	3.20837e-05
C3orf80	C3orf80	-1.58683	5.39537	5.71502e-05
DIRAS1	DIRAS1	-1.58936	3.79875	0.001481
ADAM21	ADAM21	-1.60323	1.62785	0.0962646
LGSN	LGSN	-1.61527	7.18124	1.30101e-06
SYT12	SYT12	-1.61589	32.5141	4.13433e-31
GNGT1	GNGT1	-1.62265	1.98464	0.0503342
CHMP1B2P	CHMP1B2P	-1.62921	5.0301	0.000122108
SGIP1	SGIP1	-1.63633	1.78827	0.0724259
FAM19A2	FAM19A2	-1.6535	6.44644	6.29193e-06
USH1C	USH1C	-1.65449	2.94477	0.00810877
LOC202181	LOC202181	-1.65529	3.56734	0.0023724
HPSE2	HPSE2	-1.69973	1.59522	0.101997
SNCAIP	SNCAIP	-1.70054	8.39523	9.55959e-08
EPHA3	EPHA3	-1.71637	10.5255	9.22397e-10
ITGA11	ITGA11	-1.72217	76.8148	7.97204e-75
AKR1B10	AKR1B10	-1.72272	3.41971	0.00319335
ARHGEF37	ARHGEF37	-1.73954	7.20425	1.24358e-06
HEY2	HEY2	-1.74114	2.46203	0.0205818
CDH12	CDH12	-1.74443	5.55536	4.12191e-05
WISP2	WISP2	-1.76294	14.5879	1.19649e-13
CHST8	CHST8	-1.77006	11.5585	9.64546e-11
PZP	PZP	-1.77157	29.6961	2.37498e-28
LINC01239	LINC01239	-1.77532	8.04746	2.03884e-07
SLC16A14	SLC16A14	-1.79652	13.4288	1.55114e-12
UNC5D	UNC5D	-1.79678	20.0374	6.21965e-19
ABCC8	ABCC8	-1.80546	2.38119	0.0240193
C10orf55	C10orf55	-1.8178	2.95492	0.0079536
C5AR2	C5AR2	-1.81971	1.98826	0.0500514
PDE1A	PDE1A	-1.82735	3.4181	0.00319915
PPEF1	PPEF1	-1.83489	3.8215	0.00141737
RNF182	RNF182	-1.85154	70.7345	7.24697e-69
ADAMTSL3	ADAMTSL3	-1.85423	17.6352	1.37996e-16
JAKMIP3	JAKMIP3	-1.86081	8.69084	5.02881e-08
CYP4F12	CYP4F12	-1.86156	1.6585	0.0916139
MUC16	MUC16	-1.86404	64.2748	1.87964e-62
S100A14	S100A14	-1.87046	1.705	0.0839755
AKR1C2	AKR1C2	-1.87532	104.126	6.01286e-102
DLL4	DLL4	-1.87797	1.42368	0.13725
BHLHA15	BHLHA15	-1.93739	3.87534	0.00127995
LOC100132111	LOC100132111	-1.95265	1.44788	0.131597
CFI	CFI	-1.96438	4.29725	0.000545502
SLC22A14	SLC22A14	-1.98695	1.77684	0.0738372
PLAU	PLAU	-2.00919	6.57333	4.7666e-06
AQP1	AQP1	-2.05564	16.7814	9.11941e-16
DAB1	DAB1	-2.05754	33.4895	4.47866e-32
C2CD4D	C2CD4D	-2.07746	1.48279	0.124046
FBXO27	FBXO27	-2.11469	4.34073	0.000498852
RBP1	RBP1	-2.13383	6.89406	2.39471e-06
IGF1	IGF1	-2.15628	14.0964	3.54275e-13
CACNB4	CACNB4	-2.17032	52.627	6.23349e-51
LINCR-0002	LINCR-0002	-2.1727	1.45131	0.130809
ARC	ARC	-2.17274	3.87466	0.00128127
ANO3	ANO3	-2.20744	5.79326	2.51604e-05
LOH12CR2	LOH12CR2	-2.21947	1.75285	0.0771837
SLC6A7	SLC6A7	-2.23013	1.54104	0.112083
PIWIL3	PIWIL3	-2.2445	1.53138	0.113913
COL14A1	COL14A1	-2.24912	79.5279	1.63985e-77
CYP4F11	CYP4F11	-2.26361	2.29419	0.0283514
RORC	RORC	-2.28304	2.4067	0.0228854
PDK4	PDK4	-2.28859	71.4882	1.3371e-69
TAS2R4	TAS2R4	-2.28928	2.52278	0.0184035
SNTG1	SNTG1	-2.29281	1.3944	0.14456
SVOPL	SVOPL	-2.31708	3.14769	0.00548036
FZD3	FZD3	-2.37609	3.28946	0.0041375
PRKCB	PRKCB	-2.38024	11.5493	9.8314e-11
EGR3	EGR3	-2.4134	1.53202	0.113834
STAC2	STAC2	-2.43861	42.0666	1.60393e-40
CDX2	CDX2	-2.44244	1.80658	0.0701415
SLC16A10	SLC16A10	-2.45151	2.25381	0.0304229
C4BPB	C4BPB	-2.48265	21.1835	4.79182e-20
HAGLR	HAGLR	-2.48906	4.33637	0.000502505
C1QTNF7	C1QTNF7	-2.54329	3.32595	0.00383022
KRT19	KRT19	-2.54468	43.5002	6.21377e-42
SCGB2B3P	SCGB2B3P	-2.55648	1.34626	0.157022
AKR1C1	AKR1C1	-2.57041	17.5035	1.81997e-16
CRLF1	CRLF1	-2.5956	70.2982	1.93593e-68
CDH11	CDH11	-2.68071	7.64121	4.87006e-07
SLC27A6	SLC27A6	-2.70433	5.00163	0.000129427
MED12L	MED12L	-2.78012	15.509	1.55274e-14
PPP2R2C	PPP2R2C	-2.81963	26.7902	1.66304e-25
MVB12B	MVB12B	-2.82121	1.74201	0.0787451
TLR5	TLR5	-2.8223	1.6544	0.092287
RTN1	RTN1	-2.86845	7.62456	5.02417e-07
BARX1	BARX1	-2.92704	2.67759	0.0137223
CDH7	CDH7	-2.94461	10.2914	1.55407e-09
CBLN2	CBLN2	-2.95501	1.41706	0.138813
SLC45A1	SLC45A1	-3.02241	1.38522	0.146907
TMEM59L	TMEM59L	-3.03215	4.7096	0.000237013
CPVL	CPVL	-3.0751	9.53345	8.00701e-09
ZNF354C	ZNF354C	-3.09639	2.82434	0.0102531
IGSF10	IGSF10	-3.11861	140.848	2.09187e-138
GALNT13	GALNT13	-3.14063	9.13772	1.93187e-08
THEM5	THEM5	-3.16354	1.62211	0.0970952
TMEM63C	TMEM63C	-3.17942	14.3844	1.85799e-13
CLDN4	CLDN4	-3.309	45.9245	2.50627e-44
GYPE	GYPE	-3.35	1.32512	1
MAPK4	MAPK4	-3.40294	7.62745	4.9968e-07
FAM83C-AS1	FAM83C-AS1	-3.47808	1.44849	1
AGBL1-AS1	AGBL1-AS1	-3.5566	2.1411	0.0377826
HOXA13	HOXA13	-3.57504	6.94302	2.16233e-06
BAGE5	BAGE5	-3.62371	1.53262	0.113751
BAGE4	BAGE4	-3.62371	1.53262	0.113751
FAM163A	FAM163A	-3.63394	1.59429	0.102118
BAGE3	BAGE3	-3.74399	1.64603	0.0935095
BAGE2	BAGE2	-3.74399	1.64603	0.0935095
ZNF521	ZNF521	-3.76449	16.0212	4.97133e-15
MIR6823	MIR6823	-3.76926	1.76667	0.0753423
MYEOV	MYEOV	-3.80092	11.9092	4.45981e-11
AGBL1	AGBL1	-3.81421	13.8323	6.31853e-13
LOC101929701	LOC101929701	-3.87372	1.85461	0.0642511
PDX1	PDX1	-3.92164	30.9955	1.24167e-29
LINC00890	LINC00890	-3.94382	1.44678	1
ZNF423	ZNF423	-4.0163	73.0429	3.90969e-71
SNORD114-28	SNORD114-28	-4.13033	1.64013	1
SNORD114-10	SNORD114-10	-4.15162	1.67465	1
MIR149	MIR149	-4.17826	1.69055	1
KCNH2	KCNH2	-4.24523	1.60089	1
C3orf55	C3orf55	-4.29299	1.84081	1
GREM2	GREM2	-4.29882	3.39597	0.00334077
AQP4	AQP4	-4.31699	1.86769	1
TPTE	TPTE	-4.33822	1.89153	1
PDX1-AS1	PDX1-AS1	-4.42831	5.17885	8.97488e-05
MIR381HG	MIR381HG	-4.47997	2.0907	1
HRASLS	HRASLS	-4.49924	2.08847	1
KCNJ3	KCNJ3	-4.60721	2.24498	1
LOC100507351	LOC100507351	-4.69313	2.36593	0.0247209
DCLK3	DCLK3	-4.72407	2.33145	0.026478
ADD2	ADD2	-4.72768	2.44571	0.0211811
LOC102546299	LOC102546299	-4.79238	2.44087	0.0213715
LOC100144595	LOC100144595	-4.8522	2.59481	0.0160961
SERTM1	SERTM1	-4.88539	2.62298	0.0152458
LRRN2	LRRN2	-4.89509	3.35953	0.00358633
CYP4F3	CYP4F3	-4.9453	3.46729	0.00290332
APBB1IP	APBB1IP	-4.96843	2.77007	0.0114759
CACNA1C	CACNA1C	-5.04807	3.5679	0.00237138
BRDT	BRDT	-5.05144	2.98456	0.00750176
SNORD114-20	SNORD114-20	-5.18747	3.13406	0.005623
MAGEA1	MAGEA1	-5.22325	47.3745	9.45493e-46
LOC102724484	LOC102724484	-5.27335	3.22	0.00474694
TMEM176B	TMEM176B	-5.39958	3.61631	0.00215001
HOXD-AS2	HOXD-AS2	-5.4312	4.29365	0.000549698
MEG9	MEG9	-5.51521	3.81953	0.00142229
CCDC185	CCDC185	-5.57735	3.80377	0.00146782
TMEM176A	TMEM176A	-5.65481	4.11859	0.00078063
ALDH1A2	ALDH1A2	-5.69975	45.8137	3.19695e-44
LOC101927835	LOC101927835	-5.83408	4.48141	0.000374365
AOC1	AOC1	-5.95941	4.6618	0.000260474
RTL1	RTL1	-5.97925	5.49145	4.69293e-05
MEG3	MEG3	-6.09148	47.9457	2.6042e-46
MEG8	MEG8	-6.39746	5.73532	2.8228e-05
SNHG24	SNHG24	-6.84814	6.85298	2.61013e-06
TMPRSS15	TMPRSS15	-6.851	7.44202	7.50535e-07

## Sheet: SRA KD vs. WT
name	description	log2FoldChange	pvalue	padj
MIR718	MIR718	4.71797	2.42693	1
MMP1	MMP1	4.64138	2.94397	1
ZNF404	ZNF404	4.32138	1.81804	1
SLC35D3	SLC35D3	4.27639	1.76953	1
RENBP	RENBP	4.22821	1.64452	1
MPEG1	MPEG1	4.22437	1.55065	1
HYAL4	HYAL4	4.1181	2.16561	1
MUC19	MUC19	3.99389	1.45798	1
LINC00626	LINC00626	3.96216	1.42799	1
CH25H	CH25H	3.91682	2.74794	1
CCL20	CCL20	3.45249	1.99631	1
HAPLN1	HAPLN1	3.37924	1.85704	1
PMCHL1	PMCHL1	3.37724	1.34163	1
SCTR	SCTR	3.35621	1.33295	1
FGL1	FGL1	3.15599	2.87246	1
FGF14	FGF14	3.09376	1.53114	1
FAM9B	FAM9B	3.05054	2.06638	1
HTR7	HTR7	3.01256	4.70325	0.00025071
ACTL8	ACTL8	2.91137	5.04746	0.000126088
CCDC79	CCDC79	2.89907	1.31702	1
OCA2	OCA2	2.85137	1.32432	1
TCF21	TCF21	2.76625	2.0236	1
POU5F1P3	POU5F1P3	2.63321	2.12171	1
TNFRSF1B	TNFRSF1B	2.63231	7.7146	4.88893e-07
TBR1	TBR1	2.56854	2.43391	1
KLRG2	KLRG2	2.53949	2.34678	1
MIR1256	MIR1256	2.51993	1.33045	1
RAPGEF4	RAPGEF4	2.51246	25.2628	9.17226e-24
C6orf58	C6orf58	2.41749	1.42445	1
LINC01431	LINC01431	2.38502	2.07544	1
ACPP	ACPP	2.35293	2.12355	1
C2CD4A	C2CD4A	2.3355	4.76934	0.000220354
MGC32805	MGC32805	2.30263	4.54474	0.000345915
GPR83	GPR83	2.27274	1.64593	1
STK31	STK31	2.25394	1.32978	1
WNT16	WNT16	2.2443	3.664	0.00197135
SLC26A3	SLC26A3	2.2341	1.51455	1
PTPRO	PTPRO	2.2126	24.0722	1.17224e-22
SPRY1	SPRY1	2.19139	14.64	1.45129e-13
GPR150	GPR150	2.15541	2.22976	1
RNF125	RNF125	2.1291	7.4469	8.65927e-07
LOC100505918	LOC100505918	2.11345	1.39847	1
MAP3K19	MAP3K19	2.0647	1.51685	1
MIR219B	MIR219B	2.03377	1.49555	1
HMGA2	HMGA2	2.03001	27.5595	5.6479e-26
MAL2	MAL2	1.98927	72.0871	8.73787e-70
ALOX12B	ALOX12B	1.98883	1.56243	1
MYH15	MYH15	1.94937	3.19847	0.00484971
KCNQ5	KCNQ5	1.91287	1.4299	1
DDIT4L	DDIT4L	1.90467	9.02051	2.92241e-08
MUC15	MUC15	1.90053	1.74718	1
SNORD16	SNORD16	1.89378	29.0493	1.96258e-27
HSPA6	HSPA6	1.85869	3.58024	0.00232288
A1CF	A1CF	1.85758	1.69502	1
SNORA2B	SNORA2B	1.82233	5.50466	4.99734e-05
KCNK2	KCNK2	1.82162	20.0894	8.45022e-19
ANO3	ANO3	1.79629	9.86941	4.64268e-09
FGF18	FGF18	1.72667	2.13777	0.0357884
CYP4F3	CYP4F3	1.72467	3.4299	0.00311444
ANGPTL4	ANGPTL4	1.7208	13.1275	3.92487e-12
MIR6799	MIR6799	1.7184	1.37906	1
SHISA2	SHISA2	1.70692	1.68644	1
APOE	APOE	1.695	1.46912	1
SNCAIP	SNCAIP	1.68887	12.9984	5.15696e-12
PAGE1	PAGE1	1.67661	1.82437	1
ANGPTL5	ANGPTL5	1.67242	1.58996	1
TYRP1	TYRP1	1.66766	3.14636	0.00536631
SHC4	SHC4	1.66162	1.42571	1
GPRC5C	GPRC5C	1.66121	6.27437	9.93594e-06
SERPINE2	SERPINE2	1.65769	95.3529	8.29222e-93
UCA1	UCA1	1.65034	1.66193	1
RGS16	RGS16	1.6249	10.6599	8.45346e-10
VAMP5	VAMP5	1.59389	2.00667	0.0457452
SVEP1	SVEP1	1.58689	14.8247	9.81754e-14
ST8SIA4	ST8SIA4	1.56765	1.76684	1
CXCL2	CXCL2	1.55981	26.2416	1.07138e-24
BCO2	BCO2	1.54014	1.40543	1
TRIB2	TRIB2	1.52842	4.86538	0.000181514
PTPRZ1	PTPRZ1	1.52748	5.81545	2.64061e-05
STEAP2	STEAP2	1.50183	5.00318	0.000137935
CHAC1	CHAC1	1.49598	4.41887	0.000449099
KCNQ4	KCNQ4	1.49331	2.04504	0.0426792
GYLTL1B	GYLTL1B	1.49187	10.1487	2.56428e-09
KCNJ2	KCNJ2	1.49096	5.6759	3.53116e-05
AGBL1-AS1	AGBL1-AS1	1.48727	1.7921	0.0670856
LOC375196	LOC375196	1.48614	1.49101	1
FAAH2	FAAH2	1.47543	6.47763	6.60186e-06
CFI	CFI	1.47417	5.71082	3.27301e-05
CCDC102B	CCDC102B	1.47346	3.23266	0.00454791
RFPL1	RFPL1	1.43709	2.10107	0.0384136
PLCB2	PLCB2	1.43005	2.0391	0.043117
KCNJ11	KCNJ11	1.42379	1.87151	0.0580876
ETV4	ETV4	1.42261	23.6984	2.6972e-22
MDK	MDK	1.41925	12.4819	1.6107e-11
RNU6-83P	RNU6-83P	1.41836	1.80211	0.0659241
VGF	VGF	1.4153	2.23196	0.030073
G0S2	G0S2	1.41453	2.22856	0.0302608
CYP4F12	CYP4F12	1.41163	2.16673	0.0338213
CLEC2B	CLEC2B	1.40216	1.30079	1
LOC100129940	LOC100129940	1.39795	14.4303	2.27505e-13
CXCL3	CXCL3	1.38224	6.51563	6.08921e-06
TESC	TESC	1.37635	14.7985	1.03836e-13
C3orf65	C3orf65	1.3744	2.30857	0.0262292
NR0B1	NR0B1	1.36934	1.31105	1
KBTBD11	KBTBD11	1.36665	3.09329	0.00593552
TNFSF10	TNFSF10	1.36293	1.56896	1
OSGEPL1-AS1	OSGEPL1-AS1	1.34483	1.98661	0.0474148
LHX6	LHX6	1.34233	5.55294	4.52467e-05
HOXD11	HOXD11	1.33865	1.31204	1
RERG-AS1	RERG-AS1	1.33816	1.4164	1
ITGA2	ITGA2	1.33615	25.1172	1.24087e-23
FAM26F	FAM26F	1.32304	1.97758	0.0482331
HES7	HES7	1.30191	17.6825	1.72532e-16
LOC101928784	LOC101928784	1.3001	1.7291	0.0748325
ID1	ID1	1.28142	27.1647	1.32871e-25
SNORA52	SNORA52	1.276	3.03953	0.0065752
CXCL1	CXCL1	1.27077	22.038	1.17084e-20
EPHA3	EPHA3	1.26927	10.8473	5.60704e-10
PTPRG	PTPRG	1.26696	9.39614	1.29703e-08
IL4R	IL4R	1.26203	14.2704	3.26082e-13
ANK3	ANK3	1.25274	11.5903	1.13632e-10
RASSF9	RASSF9	1.24535	6.31563	9.13817e-06
TNFSF4	TNFSF4	1.24433	1.46331	0.117728
RASL11A	RASL11A	1.24314	1.58672	0.0955151
COLQ	COLQ	1.24264	1.46242	0.117915
TSPAN8	TSPAN8	1.23492	18.5099	2.75076e-17
HSD11B2	HSD11B2	1.23195	2.53444	0.0173177
LONRF1	LONRF1	1.23001	5.63239	3.83459e-05
PHEX	PHEX	1.22998	5.90044	2.21472e-05
LOC101928100	LOC101928100	1.22228	3.31677	0.00388016
DBP	DBP	1.2205	5.58566	4.22372e-05
SLIT2	SLIT2	1.22045	18.1792	5.68697e-17
NOG	NOG	1.22011	7.0445	1.98747e-06
SNORA38B	SNORA38B	1.21562	1.75848	0.0711989
TMEM200A	TMEM200A	1.21516	1.38631	0.133509
TERT	TERT	1.20887	6.50758	6.18652e-06
CACNG6	CACNG6	1.19683	1.84353	0.0610882
DGAT2	DGAT2	1.19526	7.09163	1.80702e-06
KLRC2	KLRC2	1.19042	9.18408	2.06447e-08
AOC3	AOC3	1.18869	1.32417	0.14809
GALNT18	GALNT18	1.18862	1.73806	0.0737598
THSD7A	THSD7A	1.18542	1.8757	0.0577603
TCP11L2	TCP11L2	1.1714	6.17461	1.23322e-05
RYR2	RYR2	1.16973	3.94064	0.00115037
OR2B6	OR2B6	1.16727	4.06289	0.000905835
UNC13A	UNC13A	1.16617	1.68084	0.0813159
CA9	CA9	1.16469	3.93741	0.00115586
SCARNA18	SCARNA18	1.15816	1.3548	0.14083
GPRIN3	GPRIN3	1.15577	4.80178	0.000206646
ETV5	ETV5	1.14737	9.04022	2.80423e-08
DUSP2	DUSP2	1.14694	9.60839	8.27797e-09
KLRC4-KLRK1	KLRC4-KLRK1	1.14193	3.66456	0.00197122
NHLRC1	NHLRC1	1.12693	2.32137	0.0256136
AKR1C1	AKR1C1	1.12664	8.84308	4.30888e-08
HS3ST1	HS3ST1	1.12338	1.49109	0.111944
KIF5C	KIF5C	1.11895	4.73152	0.000237789
PTX3	PTX3	1.11246	2.30041	0.0266508
KLRK1	KLRK1	1.10584	2.18303	0.0328512
RFPL1S	RFPL1S	1.10304	2.9095	0.00847055
KLRC3	KLRC3	1.10227	6.9489	2.43031e-06
ANTXR2	ANTXR2	1.10104	11.1621	2.86729e-10
PRR15	PRR15	1.10054	2.84605	0.00957398
MTHFD2L	MTHFD2L	1.09987	7.29275	1.19425e-06
RNU6ATAC	RNU6ATAC	1.0935	3.36514	0.00352245
SHROOM2	SHROOM2	1.09299	4.35298	0.000512004
PRDM13	PRDM13	1.09269	4.73339	0.000237111
PHLDA1	PHLDA1	1.08893	19.7066	1.92055e-18
STEAP1	STEAP1	1.08508	3.93263	0.00116321
MIR3687-1	MIR3687-1	1.07902	1.5851	0.0957057
LIPH	LIPH	1.07767	3.96342	0.00110344
DTNA	DTNA	1.07481	3.7598	0.00162925
TTC3P1	TTC3P1	1.07224	2.10314	0.0382679
SPINK4	SPINK4	1.06074	2.07542	0.0403068
RUVBL1-AS1	RUVBL1-AS1	1.05791	1.43136	0.124186
DPY19L2P4	DPY19L2P4	1.05532	3.71167	0.00179926
LINGO2	LINGO2	1.05491	5.74794	3.02534e-05
MIR5087	MIR5087	1.05283	2.0325	0.0434902
FST	FST	1.03882	4.68101	0.000262773
RNVU1-8	RNVU1-8	1.03839	1.73014	0.0747145
TNFSF15	TNFSF15	1.02442	4.95158	0.000153093
SCN1A	SCN1A	1.02334	2.25924	0.028608
C11orf71	C11orf71	1.01987	3.75965	0.00162925
LYPD6B	LYPD6B	1.01936	3.79949	0.00150723
IL27RA	IL27RA	1.01748	5.77519	2.87155e-05
PRTG	PRTG	1.01545	9.6248	7.98899e-09
E2F6	E2F6	1.00208	14.6227	1.50396e-13
ERVMER34-1	ERVMER34-1	1.00185	3.30959	0.00393217
PTGS2	PTGS2	1.00116	13.9745	6.1696e-13
ABLIM3	ABLIM3	-1.00004	11.4628	1.49718e-10
LOC100996758	LOC100996758	-1.00532	1.57426	0.0974045
MGLL	MGLL	-1.00571	27.3783	8.34181e-26
CAPN5	CAPN5	-1.0073	1.37816	0.135061
PYROXD2	PYROXD2	-1.01164	5.81998	2.61622e-05
BCAS4	BCAS4	-1.01342	1.50191	0.109929
CDKN2D	CDKN2D	-1.01472	2.77657	0.0109162
INSIG1	INSIG1	-1.01486	18.6203	2.17196e-17
PLAC8	PLAC8	-1.0171	8.04464	2.39735e-07
APOBEC4	APOBEC4	-1.01886	1.63438	0.087997
PTGES3L	PTGES3L	-1.01978	6.12523	1.37324e-05
SAMD4A	SAMD4A	-1.01979	19.5331	2.8449e-18
MIR6716	MIR6716	-1.01979	2.03553	0.0433088
HSF2BP	HSF2BP	-1.01994	3.77599	0.00157698
ROR1	ROR1	-1.02049	17.0914	6.47815e-16
LTBP1	LTBP1	-1.02266	19.8756	1.32728e-18
RTKN2	RTKN2	-1.02634	16.7784	1.29722e-15
MYBL1	MYBL1	-1.02713	18.7514	1.65646e-17
MEG3	MEG3	-1.0293	9.2721	1.70009e-08
TGFB2-OT1	TGFB2-OT1	-1.02937	9.4051	1.27329e-08
MGAT5B	MGAT5B	-1.02979	4.22949	0.000652421
ITGA4	ITGA4	-1.03013	7.11369	1.72785e-06
PLEKHG1	PLEKHG1	-1.03101	4.4949	0.000383627
CSDC2	CSDC2	-1.03272	10.3207	1.75984e-09
SELM	SELM	-1.03389	4.15848	0.000747485
MIR614	MIR614	-1.03441	7.95392	2.91151e-07
THY1	THY1	-1.03978	19.3179	4.57972e-18
APCDD1L-AS1	APCDD1L-AS1	-1.04039	1.85726	0.0595603
RNF224	RNF224	-1.04166	2.99995	0.0070794
CCDC136	CCDC136	-1.04301	2.10224	0.0383349
DENND6B	DENND6B	-1.04523	2.48027	0.0191527
LOC100130880	LOC100130880	-1.04571	2.9307	0.00811543
SLC2A1-AS1	SLC2A1-AS1	-1.04639	1.80226	0.0659201
MIR6892	MIR6892	-1.04719	2.05124	0.0422348
GPRC5A	GPRC5A	-1.05186	29.1961	1.44231e-27
MAP7	MAP7	-1.0523	21.4404	4.40929e-20
RNF113B	RNF113B	-1.05352	2.30104	0.0266214
ARHGEF37	ARHGEF37	-1.05502	2.93932	0.00798176
SYNJ2-IT1	SYNJ2-IT1	-1.05625	1.93558	0.0520298
PALLD	PALLD	-1.05696	34.4357	1.03437e-32
CGNL1	CGNL1	-1.05989	3.3617	0.00354847
PRSS54	PRSS54	-1.06027	1.30197	0.153389
ADRB2	ADRB2	-1.06309	5.57552	4.3188e-05
TGFB2	TGFB2	-1.06387	25.1202	1.24087e-23
TGFB2-AS1	TGFB2-AS1	-1.06405	3.45292	0.00297869
CRIP1	CRIP1	-1.06937	18.4258	3.29889e-17
TRAF5	TRAF5	-1.06949	24.9903	1.576e-23
ROR1-AS1	ROR1-AS1	-1.07253	2.86145	0.00928217
HUNK	HUNK	-1.07418	1.50097	0.110013
TUBA1A	TUBA1A	-1.07487	20.0271	9.68723e-19
NEXN	NEXN	-1.07533	12.6049	1.21754e-11
DAB2	DAB2	-1.0756	20.5582	3.15643e-19
MAMDC2	MAMDC2	-1.07781	11.6156	1.07515e-10
AFAP1L1	AFAP1L1	-1.07836	7.47267	8.19875e-07
STMN1	STMN1	-1.07869	24.5038	4.55016e-23
NACAD	NACAD	-1.07912	1.58113	0.0963823
LOC100129973	LOC100129973	-1.07999	2.1236	0.0367936
LINC01186	LINC01186	-1.08034	1.82628	0.0630955
TMPRSS3	TMPRSS3	-1.08094	5.82375	2.59658e-05
SEMA3B	SEMA3B	-1.08281	11.7694	7.68076e-11
MEOX1	MEOX1	-1.08293	4.82978	0.000194936
MAP1B	MAP1B	-1.08608	37.2048	2.07319e-35
CTGF	CTGF	-1.08644	32.4774	8.44169e-31
LINC01133	LINC01133	-1.08684	4.76662	0.000221547
FAM71C	FAM71C	-1.0874	1.81314	0.0645948
KANK4	KANK4	-1.09061	1.30965	0.151785
MYOM3	MYOM3	-1.09093	1.75975	0.0710485
HHIP	HHIP	-1.09216	4.47108	0.000403628
PDLIM3	PDLIM3	-1.09217	3.17535	0.00508347
LIMA1	LIMA1	-1.0923	24.4781	4.7815e-23
CDKN2B	CDKN2B	-1.09448	42.0273	3.90007e-40
ZNF469	ZNF469	-1.09452	20.5269	3.36642e-19
PLCB4	PLCB4	-1.09471	13.6297	1.30794e-12
SFXN1	SFXN1	-1.0949	27.4055	7.94141e-26
DUSP1	DUSP1	-1.09529	16.7598	1.34683e-15
CAV2	CAV2	-1.09662	25.1021	1.25745e-23
AMIGO2	AMIGO2	-1.09873	26.2242	1.10151e-24
HTRA3	HTRA3	-1.10119	3.22248	0.00462684
COL4A4	COL4A4	-1.10202	42.281	2.23672e-40
SLC1A4	SLC1A4	-1.10525	15.6979	1.40719e-14
ADAMTSL5	ADAMTSL5	-1.10835	5.28644	7.71544e-05
FLJ44511	FLJ44511	-1.11142	1.44662	0.120818
PQLC3	PQLC3	-1.11171	4.17704	0.000722262
C10orf54	C10orf54	-1.11241	9.01223	2.97259e-08
MYH9	MYH9	-1.11581	6.49872	6.30567e-06
TAPT1-AS1	TAPT1-AS1	-1.116	2.2405	0.0295884
MIR548D1	MIR548D1	-1.11606	2.75122	0.0114376
MIR548AA1	MIR548AA1	-1.11606	2.75122	0.0114376
ADAM19	ADAM19	-1.11637	22.9049	1.63236e-21
HES1	HES1	-1.11787	6.90596	2.63716e-06
GAS2L3	GAS2L3	-1.11846	10.8893	5.11716e-10
PHLDB1	PHLDB1	-1.12133	20.7533	2.0298e-19
STX11	STX11	-1.1219	4.79095	0.000211122
LAMB2	LAMB2	-1.12321	20.4806	3.68964e-19
CGN	CGN	-1.12366	2.28803	0.0271889
HBEGF	HBEGF	-1.12599	4.60773	0.000304901
FSTL3	FSTL3	-1.12809	18.517	2.72228e-17
DCTD	DCTD	-1.12949	17.5562	2.27021e-16
COL5A1	COL5A1	-1.13187	17.3195	3.8729e-16
MSRB3	MSRB3	-1.13236	22.7955	2.08184e-21
FAM189A2	FAM189A2	-1.1339	2.76741	0.0111005
LOC100126784	LOC100126784	-1.134	15.2535	3.77378e-14
CYP4V2	CYP4V2	-1.13829	3.23126	0.00455411
CES4A	CES4A	-1.14022	2.92367	0.0082251
C1orf106	C1orf106	-1.14246	1.55943	0.100046
CARD10	CARD10	-1.14291	7.02898	2.05071e-06
TCP11L1	TCP11L1	-1.14417	19.8474	1.40695e-18
FAM46B	FAM46B	-1.14438	4.16074	0.000745552
RCN1	RCN1	-1.14469	35.6026	7.46551e-34
LINC00294	LINC00294	-1.14803	14.5636	1.70865e-13
PODNL1	PODNL1	-1.14902	3.93939	0.00115245
CDRT1	CDRT1	-1.15092	4.94212	0.00015572
CORO1C	CORO1C	-1.15445	39.8003	6.07095e-38
P4HA3	P4HA3	-1.15496	4.36502	0.000500876
LOC100505625	LOC100505625	-1.1566	1.30671	0.152508
LOXL1-AS1	LOXL1-AS1	-1.15945	15.5532	1.93672e-14
L1CAM	L1CAM	-1.15964	41.6078	9.70763e-40
SRRM4	SRRM4	-1.16167	1.43484	0.123422
CAMK2N1	CAMK2N1	-1.16245	1.31435	0.150658
UCN	UCN	-1.16273	1.57897	0.0965952
PDGFA	PDGFA	-1.16746	8.063	2.30521e-07
PGAM1P5	PGAM1P5	-1.16934	1.57062	0.0981058
LOC100505984	LOC100505984	-1.17211	1.62575	0.0892421
RNF150	RNF150	-1.17426	29.2176	1.39359e-27
UCN2	UCN2	-1.17468	10.9179	4.8424e-10
TUB-AS1	TUB-AS1	-1.17611	3.97522	0.00107901
WNK3	WNK3	-1.1782	1.65225	0.085379
LRP11	LRP11	-1.18119	33.7584	4.74115e-32
MFAP5	MFAP5	-1.18155	8.6154	7.07948e-08
MIR6819	MIR6819	-1.18621	1.90828	0.0545551
PLXNA2	PLXNA2	-1.19214	9.29277	1.62453e-08
ARHGAP33	ARHGAP33	-1.19297	6.63431	4.72786e-06
PLCXD2-AS1	PLCXD2-AS1	-1.19343	1.82355	0.0633857
CCL2	CCL2	-1.19408	13.6837	1.16441e-12
FBXW10	FBXW10	-1.19597	1.44179	0.121775
SMTN	SMTN	-1.19849	16.0639	6.17417e-15
IBA57-AS1	IBA57-AS1	-1.20239	1.50278	0.109781
PKIG	PKIG	-1.20295	1.86686	0.0585779
NKX2-1	NKX2-1	-1.20509	1.88779	0.0564724
MYADM	MYADM	-1.20549	33.767	4.73415e-32
NAV2-AS2	NAV2-AS2	-1.20569	12.7887	8.16171e-12
NTN4	NTN4	-1.20702	21.7361	2.30667e-20
RTN2	RTN2	-1.20883	4.28788	0.000580223
WIPF1	WIPF1	-1.21095	25.2925	8.66368e-24
PRR5L	PRR5L	-1.22137	25.7664	3.01192e-24
LPAL2	LPAL2	-1.22243	2.24926	0.0291074
RNASE4	RNASE4	-1.22446	1.75112	0.0720221
KRCC1	KRCC1	-1.22918	5.36997	6.59582e-05
PALM	PALM	-1.22966	13.8198	8.64017e-13
CERCAM	CERCAM	-1.23441	26.019	1.72423e-24
ACKR3	ACKR3	-1.23752	41.6526	8.99227e-40
LOC100506281	LOC100506281	-1.24005	1.44723	0.120759
RTL1	RTL1	-1.24246	1.46041	0.118164
CCDC176	CCDC176	-1.24484	5.35271	6.79299e-05
PEAR1	PEAR1	-1.24836	7.49397	7.84611e-07
F8	F8	-1.25128	1.61125	0.0914404
ACADSB	ACADSB	-1.25589	5.90696	2.18453e-05
FBLN5	FBLN5	-1.25714	24.8068	2.3801e-23
EPPK1	EPPK1	-1.25742	7.31322	1.14465e-06
GPNMB	GPNMB	-1.25906	4.57001	0.000328222
FLNB	FLNB	-1.26109	68.4542	3.50235e-66
GPR64	GPR64	-1.26173	6.64153	4.65621e-06
IL1B	IL1B	-1.26266	2.83623	0.00973178
LINC00707	LINC00707	-1.26339	12.6708	1.05997e-11
TMCC2	TMCC2	-1.26855	1.87194	0.0580876
LDB3	LDB3	-1.27029	2.53798	0.0171973
CSPG5	CSPG5	-1.2709	2.42258	0.021315
RHBDL3	RHBDL3	-1.27812	3.36895	0.00349551
LINC01239	LINC01239	-1.27814	3.75969	0.00162925
GSN	GSN	-1.28198	29.7801	3.87618e-28
LMNTD1	LMNTD1	-1.28268	3.12119	0.00562705
PFKFB4	PFKFB4	-1.28441	19.2547	5.26457e-18
EIF4E3	EIF4E3	-1.28621	1.69416	0.079729
SLCO2A1	SLCO2A1	-1.2869	10.9469	4.55354e-10
HHAT	HHAT	-1.28999	5.13567	0.000105189
LOC101928418	LOC101928418	-1.29386	2.95737	0.00769161
IGFBP5	IGFBP5	-1.29664	3.92434	0.00118013
SC5D	SC5D	-1.29762	25.1123	1.24128e-23
COL5A3	COL5A3	-1.30301	4.30757	0.00055702
LOC101927884	LOC101927884	-1.30318	1.7732	0.0693364
HTR1D	HTR1D	-1.30526	21.696	2.48845e-20
LBH	LBH	-1.30553	23.441	4.79318e-22
MAFB	MAFB	-1.30927	3.59305	0.0022629
SVOPL	SVOPL	-1.31548	1.47505	0.115169
MEIS3P1	MEIS3P1	-1.3161	10.8996	5.01088e-10
NAV2	NAV2	-1.31759	52.0338	5.76261e-50
CYR61	CYR61	-1.31823	51.4606	1.99113e-49
EVA1A	EVA1A	-1.32194	7.33963	1.08567e-06
DIRAS1	DIRAS1	-1.33387	2.4815	0.019126
PLEKHA2	PLEKHA2	-1.33562	51.7305	1.11232e-49
SNHG24	SNHG24	-1.34149	1.55003	0.101554
LUZP2	LUZP2	-1.34245	6.87747	2.804e-06
GBP1	GBP1	-1.34604	47.8019	7.86373e-46
TRIM29	TRIM29	-1.34617	7.12839	1.67791e-06
FBLIM1	FBLIM1	-1.35453	21.7825	2.09089e-20
PLB1	PLB1	-1.35646	1.85337	0.0600104
VENTXP1	VENTXP1	-1.35905	3.32836	0.00378826
ANG	ANG	-1.36127	1.93064	0.0523901
CD24	CD24	-1.36315	35.5469	8.32232e-34
MIR3936	MIR3936	-1.36681	2.57131	0.0161773
COL4A3	COL4A3	-1.3686	47.3612	2.09959e-45
GPX7	GPX7	-1.36933	2.89663	0.00868131
MIR2355	MIR2355	-1.37728	1.91684	0.0537125
KIF26A	KIF26A	-1.38047	3.30754	0.00394864
BZRAP1	BZRAP1	-1.38326	2.01802	0.0447814
TPM4	TPM4	-1.38465	50.7277	9.65171e-49
CDA	CDA	-1.38655	22.6361	2.97905e-21
THBS1	THBS1	-1.38897	65.6457	1.98868e-63
KIAA0513	KIAA0513	-1.38908	2.78343	0.0107877
TGFB1I1	TGFB1I1	-1.39184	37.8343	4.97674e-36
HPD	HPD	-1.40602	3.69362	0.0018675
NPTX1	NPTX1	-1.40844	14.4046	2.40383e-13
TPM1	TPM1	-1.40881	77.0192	1.19196e-74
PADI1	PADI1	-1.41107	1.95506	0.0501693
LOC100268168	LOC100268168	-1.41202	6.92296	2.5614e-06
CLDN14	CLDN14	-1.413	3.23068	0.00455447
HKDC1	HKDC1	-1.41734	1.52366	1
CCDC92	CCDC92	-1.42271	12.8296	7.45274e-12
C1QL1	C1QL1	-1.42802	7.08382	1.83434e-06
GSN-AS1	GSN-AS1	-1.43066	9.69713	6.82472e-09
CSPG4	CSPG4	-1.43082	23.7684	2.31653e-22
SCARA3	SCARA3	-1.43277	57.3719	3.02368e-55
CYFIP2	CYFIP2	-1.43525	24.1802	9.22712e-23
PTGS1	PTGS1	-1.4466	2.19102	0.0323608
ITGA7	ITGA7	-1.44828	6.47359	6.63724e-06
USP2	USP2	-1.45027	4.77899	0.000216265
CLIC3	CLIC3	-1.45229	10.497	1.20827e-09
SCN3A	SCN3A	-1.45375	8.60893	7.17176e-08
CALD1	CALD1	-1.45853	78.9501	1.67718e-76
FIBCD1	FIBCD1	-1.4594	2.05506	0.0419015
AMTN	AMTN	-1.46016	4.86402	0.000181923
LOC101927056	LOC101927056	-1.46801	2.9393	0.00798176
FAM179A	FAM179A	-1.46974	3.07945	0.00608878
JUN	JUN	-1.47099	33.7063	5.25037e-32
PRUNE2	PRUNE2	-1.47134	55.5904	1.74522e-53
LOC101929690	LOC101929690	-1.47883	1.5407	1
NRXN3	NRXN3	-1.48183	5.64528	3.75966e-05
JPH2	JPH2	-1.48422	32.9118	3.15841e-31
F3	F3	-1.48774	44.4134	1.80352e-42
LRRC7	LRRC7	-1.48782	1.76976	0.0698052
MYPN	MYPN	-1.49048	27.7672	3.54906e-26
MICAL2	MICAL2	-1.4938	35.6662	6.58093e-34
HS3ST5	HS3ST5	-1.49386	1.43889	1
LOXL1	LOXL1	-1.50303	36.525	9.4971e-35
PDGFRB	PDGFRB	-1.51335	11.4341	1.58829e-10
IGSF10	IGSF10	-1.51403	24.1944	9.01573e-23
SDPR	SDPR	-1.51644	6.0544	1.59887e-05
CDH6	CDH6	-1.52007	21.7248	2.34785e-20
FBXO32	FBXO32	-1.52011	38.436	1.30441e-36
LOC101927934	LOC101927934	-1.52236	1.57609	1
ANXA8L1	ANXA8L1	-1.52452	7.31362	1.14465e-06
ACOX3	ACOX3	-1.52712	23.5516	3.74875e-22
GPR1	GPR1	-1.52917	10.3866	1.52685e-09
CDH3	CDH3	-1.543	1.42297	1
FHDC1	FHDC1	-1.54492	13.058	4.54216e-12
CDC42EP3	CDC42EP3	-1.54543	52.9243	7.73832e-51
FNDC1	FNDC1	-1.55111	3.97524	0.00107901
P2RY6	P2RY6	-1.559	1.58862	1
LINC00313	LINC00313	-1.56478	6.81462	3.2134e-06
PCA3	PCA3	-1.5679	12.4721	1.63156e-11
ADAMTS15	ADAMTS15	-1.56842	24.7857	2.47342e-23
FSTL1	FSTL1	-1.57142	75.1485	8.17011e-73
TCF7L1	TCF7L1	-1.57583	1.78305	1
SLC2A5	SLC2A5	-1.58129	2.0325	0.0434902
UGT8	UGT8	-1.58621	25.059	1.37379e-23
AOX1	AOX1	-1.59427	31.3211	1.13292e-29
FOXE1	FOXE1	-1.59803	15.3788	2.85392e-14
MIR554	MIR554	-1.5985	2.03249	0.0434902
WFDC1	WFDC1	-1.60615	14.2226	3.59666e-13
MIR5190	MIR5190	-1.61527	1.55585	1
GLIPR2	GLIPR2	-1.63103	28.1905	1.35791e-26
GPR17	GPR17	-1.63647	10.9121	4.88156e-10
SDC3	SDC3	-1.64663	14.0006	5.83175e-13
TMEM255B	TMEM255B	-1.64888	1.47709	1
TUFT1	TUFT1	-1.6499	50.9399	6.13195e-49
ANXA8	ANXA8	-1.66089	4.90595	0.000167133
SLC4A3	SLC4A3	-1.66681	1.69439	1
SHISA4	SHISA4	-1.66779	4.69471	0.000255257
CSRP1	CSRP1	-1.66816	78.9063	1.68665e-76
MED12L	MED12L	-1.67172	6.38889	7.91993e-06
KIAA1324	KIAA1324	-1.67751	8.15956	1.87572e-07
ACTC1	ACTC1	-1.68105	26.0519	1.61778e-24
ATP6V0A4	ATP6V0A4	-1.69069	1.70178	1
VGLL3	VGLL3	-1.70058	34.5362	8.36558e-33
MIR198	MIR198	-1.70513	27.2203	1.18451e-25
TP53I11	TP53I11	-1.70748	3.80866	0.00147949
SPOCD1	SPOCD1	-1.71361	43.8944	5.60768e-42
IGIP	IGIP	-1.72186	7.1122	1.73118e-06
AQP1	AQP1	-1.72235	11.1885	2.72093e-10
MIR570	MIR570	-1.72548	1.67757	1
NKX2-5	NKX2-5	-1.73623	5.75267	2.99907e-05
TSPAN18	TSPAN18	-1.74263	5.81493	2.64072e-05
NPNT	NPNT	-1.74451	38.147	2.4787e-36
ANKRD36BP2	ANKRD36BP2	-1.7499	1.64912	1
DOCK2	DOCK2	-1.76347	14.5041	1.93554e-13
RGCC	RGCC	-1.76466	2.69937	0.0126381
SSC5D	SSC5D	-1.76945	25.9929	1.80933e-24
SYNPO2	SYNPO2	-1.77121	14.6402	1.45129e-13
MAMDC2-AS1	MAMDC2-AS1	-1.77158	2.65193	0.013867
LGSN	LGSN	-1.7808	6.27148	9.98979e-06
ATP2A3	ATP2A3	-1.78484	14.6017	1.57194e-13
KCNQ1	KCNQ1	-1.80262	1.907	1
SGIP1	SGIP1	-1.80409	1.70162	1
ITGB3	ITGB3	-1.80584	26.3845	7.80826e-25
NEDD9	NEDD9	-1.81844	39.4365	1.33486e-37
MYOCD	MYOCD	-1.8194	59.9427	8.97817e-58
SERPINE1	SERPINE1	-1.82945	51.3768	2.32566e-49
HRCT1	HRCT1	-1.83586	10.0234	3.38133e-09
ECEL1	ECEL1	-1.84754	8.09069	2.17834e-07
RGS11	RGS11	-1.84762	1.52358	1
FBLN2	FBLN2	-1.84764	2.93139	0.00810644
PIGZ	PIGZ	-1.85364	1.65769	1
POTEJ	POTEJ	-1.8653	1.84959	1
TAGLN	TAGLN	-1.87783	60.4255	3.11796e-58
KRT14	KRT14	-1.88475	2.56213	0.0164104
COPZ2	COPZ2	-1.89429	6.06692	1.55721e-05
DKFZP434H168	DKFZP434H168	-1.89968	1.54418	1
GRID1	GRID1	-1.9013	1.96593	1
MIR145	MIR145	-1.90413	1.39025	1
NR4A3	NR4A3	-1.91048	24.7109	2.90885e-23
GBGT1	GBGT1	-1.91114	1.38554	1
NKX2-8	NKX2-8	-1.91219	1.39892	1
CASZ1	CASZ1	-1.91524	18.7615	1.62826e-17
KCNH1	KCNH1	-1.91894	24.6224	3.53105e-23
GPR133	GPR133	-1.9229	18.4926	2.84574e-17
HMX3	HMX3	-1.92362	17.3442	3.67821e-16
LOC100128006	LOC100128006	-1.95837	19.9733	1.07437e-18
ADAM12	ADAM12	-1.95922	108.133	1.83653e-105
KRT80	KRT80	-1.9629	119.751	1.32567e-116
SDC1	SDC1	-1.9818	44.2705	2.4305e-42
PROM1	PROM1	-1.98364	3.0708	0.0062006
BDKRB2	BDKRB2	-1.98509	3.29424	0.00404741
KLHL30	KLHL30	-1.98571	5.48919	5.16192e-05
MYL9	MYL9	-1.98937	116.654	6.63988e-114
LIMS2	LIMS2	-1.99087	37.17	2.19758e-35
MIR6079	MIR6079	-2.01904	1.62982	1
ANO2	ANO2	-2.04846	2.20621	1
OLFML2B	OLFML2B	-2.05379	3.92632	0.00117598
TSPAN2	TSPAN2	-2.05493	16.5184	2.30044e-15
NEURL1B	NEURL1B	-2.0551	28.9409	2.4827e-27
KRT17	KRT17	-2.05943	117.209	2.3103e-114
COL1A1	COL1A1	-2.06022	15.6813	1.45523e-14
CREB3L1	CREB3L1	-2.06954	20.1213	7.9071e-19
CRYAB	CRYAB	-2.07635	2.14442	1
KRT16	KRT16	-2.0819	1.80723	1
CATSPER1	CATSPER1	-2.09455	3.83177	0.00141271
ARSI	ARSI	-2.09673	4.78078	0.00021556
C5orf46	C5orf46	-2.09889	7.83681	3.74702e-07
NGF	NGF	-2.11255	3.94726	0.00113834
CRISPLD2	CRISPLD2	-2.12814	9.88509	4.50921e-09
ZNF488	ZNF488	-2.14071	2.91154	0.00844025
FNDC9	FNDC9	-2.16655	2.13152	1
SERPINB7	SERPINB7	-2.20202	1.68235	1
MX2	MX2	-2.22394	1.37224	1
KRT42P	KRT42P	-2.25198	1.38987	1
ALPK2	ALPK2	-2.26016	39.6478	8.40955e-38
HIVEP3	HIVEP3	-2.27638	59.6122	1.82595e-57
SRPR	SRPR	-2.3302	88.0877	1.35751e-85
NPAS4	NPAS4	-2.33357	8.31183	1.36296e-07
NFATC2	NFATC2	-2.35147	13.5807	1.44864e-12
H19	H19	-2.39343	2.62671	1
MIR143HG	MIR143HG	-2.41228	16.1103	5.60304e-15
FGF1	FGF1	-2.43295	1.66628	1
MYO7B	MYO7B	-2.44377	7.96968	2.82255e-07
BGN	BGN	-2.44656	4.81697	0.000200067
MAPK4	MAPK4	-2.46125	4.72093	0.000242347
PZP	PZP	-2.47383	36.184	2.03925e-34
PSG4	PSG4	-2.47793	1.41631	1
GAS6-AS2	GAS6-AS2	-2.47859	2.08167	1
CACNG4	CACNG4	-2.52213	29.0969	1.78537e-27
TNNC1	TNNC1	-2.52446	15.5294	2.036e-14
STAC2	STAC2	-2.54539	33.6757	5.53509e-32
TENM2	TENM2	-2.59227	31.5411	7.16911e-30
ELN	ELN	-2.5959	7.02728	2.05577e-06
ACTG2	ACTG2	-2.61784	8.83764	4.34567e-08
PRKCB	PRKCB	-2.62421	10.1678	2.45993e-09
ACTA2-AS1	ACTA2-AS1	-2.63236	68.1887	6.05152e-66
FOXS1	FOXS1	-2.64623	9.09751	2.48837e-08
TMEM59L	TMEM59L	-2.65047	3.28779	1
IL11	IL11	-2.65923	18.7146	1.79153e-17
PTPRQ	PTPRQ	-2.68176	5.94639	2.01613e-05
LINC00670	LINC00670	-2.68574	4.22678	0.000655044
MKRN9P	MKRN9P	-2.69823	2.59591	1
DOCK8	DOCK8	-2.70096	1.62854	1
INSL4	INSL4	-2.7018	1.74525	1
ACTA2	ACTA2	-2.71973	100.869	2.88961e-98
OLFML2A	OLFML2A	-2.73726	119.312	2.42734e-116
NXPH4	NXPH4	-2.7845	3.6761	1
MIR5584	MIR5584	-2.85112	1.4167	1
ITGA11	ITGA11	-2.8758	138.373	6.32899e-135
SCGB3A2	SCGB3A2	-2.94	1.41054	1
AOC1	AOC1	-2.9501	2.02884	1
LRRC2	LRRC2	-3.10319	3.61536	1
LINC00539	LINC00539	-3.13912	1.61009	1
CCIN	CCIN	-3.16677	3.02647	1
EDN2	EDN2	-3.17441	17.7924	1.34711e-16
STON1-GTF2A1L	STON1-GTF2A1L	-3.1877	1.73163	1
LRRC15	LRRC15	-3.22674	21.2692	6.43518e-20
MRVI1	MRVI1	-3.23152	1.79556	1
SLC46A2	SLC46A2	-3.27707	1.35257	1
KRT8P41	KRT8P41	-3.28769	1.36999	1
LOC284344	LOC284344	-3.3196	1.41151	1
MUC7	MUC7	-3.38084	2.05602	1
EDN1	EDN1	-3.40196	16.9381	9.12216e-16
WISP2	WISP2	-3.41597	25.5137	5.26529e-24
DES	DES	-3.42603	1.48445	1
CNN1	CNN1	-3.43426	28.9095	2.63074e-27
PSG6	PSG6	-3.53248	1.61415	1
UBE2MP1	UBE2MP1	-3.69814	1.30786	1
RTP3	RTP3	-3.72071	1.3625	1
DKFZP434K028	DKFZP434K028	-3.74244	1.39203	1
LOC284581	LOC284581	-3.74455	1.38396	1
PDGFB	PDGFB	-3.81972	16.2444	4.13431e-15
HRASLS2	HRASLS2	-3.82156	1.31467	1
LYNX1	LYNX1	-3.84653	1.45311	1
MIR6124	MIR6124	-3.8886	1.54335	1
LOC101929698	LOC101929698	-3.90619	1.54899	1
KRT13	KRT13	-4.07317	1.67647	1
CES3	CES3	-4.39459	2.73197	1
TMEM176B	TMEM176B	-4.82757	2.82668	1
TMEM176A	TMEM176A	-5.0825	3.25722	1

## Sheet: SRB KO SRA KD vs WT
name	description	log2FoldChange	pvalue	padj
MMP1	MMP1	10.4472	17.8334	8.50853e-17
EDA2R	EDA2R	8.38498	11.465	1.06367e-10
WTAPP1	WTAPP1	8.29729	11.2212	1.82693e-10
CPXM1	CPXM1	7.81615	9.52029	7.33327e-09
CCL20	CCL20	6.29962	8.17042	1.34862e-07
TENM4	TENM4	6.29452	5.36219	5.12483e-05
COL13A1	COL13A1	6.06482	4.73949	0.000186212
LAPTM5	LAPTM5	6.03092	5.57925	3.26503e-05
TFAP2C	TFAP2C	5.96137	7.24471	9.84025e-07
CHI3L1	CHI3L1	5.88845	5.26314	6.30092e-05
WDR86-AS1	WDR86-AS1	5.87295	4.59109	0.000251511
HAPLN1	HAPLN1	5.73821	6.58234	4.05232e-06
SERPINB3	SERPINB3	5.71161	4.90713	0.000132202
ANKRD22	ANKRD22	5.70821	4.17015	0.00059067
DSCR8	DSCR8	5.65765	4.07154	0.000719277
SH3RF3-AS1	SH3RF3-AS1	5.63626	4.04877	0.000750932
LOC101927273	LOC101927273	5.62975	4.09237	0.000688829
SERPINB4	SERPINB4	5.62622	4.6855	0.000209316
MUC19	MUC19	5.59589	3.92301	0.00096969
PDE9A	PDE9A	5.53196	3.81513	0.00120669
LMO2	LMO2	5.41427	8.52266	6.3592e-08
CYTIP	CYTIP	5.37085	3.96987	0.000880157
RYR2	RYR2	5.3389	159.309	8.85723e-156
SFRP2	SFRP2	5.31412	4.11673	0.000654272
POSTN	POSTN	5.31198	138.491	2.90777e-135
RENBP	RENBP	5.24967	3.32976	0.0031698
DCAF12L2	DCAF12L2	5.24592	3.28433	0.00347623
SPATA18	SPATA18	5.22201	3.16894	0.00439205
MPEG1	MPEG1	5.09802	3.03135	0.00575643
LINC01433	LINC01433	5.07222	2.99341	0.00620744
MDGA2	MDGA2	5.07087	3.02098	0.00588547
IDO1	IDO1	5.06602	4.98217	0.00011344
GPR98	GPR98	5.05977	30.6583	2.8287e-29
ITM2A	ITM2A	5.0128	3.53436	0.00209874
SHISA2	SHISA2	5.00438	25.4495	3.38868e-24
IGFBP2	IGFBP2	5.00258	22.7443	1.41863e-21
LINC00314	LINC00314	4.97819	2.86548	0.00796555
WASF3	WASF3	4.9753	39.2332	1.18412e-37
VNN 3.00	VNN 3.00	4.95796	3.40729	0.00271269
ABCA6	ABCA6	4.90394	8.45855	7.27715e-08
ZNF577	ZNF577	4.89798	2.69305	0.0111891
B3GNT3	B3GNT3	4.89798	2.69305	0.0111891
HTR7	HTR7	4.86481	15.893	6.1023e-15
VNN 2.00	VNN 2.00	4.84664	3.29688	0.00338849
DCT	DCT	4.80837	3.22479	0.00392866
TNFSF18	TNFSF18	4.79256	3.20863	0.00405244
STC1	STC1	4.77958	3.04683	0.00558292
CXCL5	CXCL5	4.77329	2.43841	0.0182308
PTGIR	PTGIR	4.74231	2.44295	0.0180912
HYAL4	HYAL4	4.7373	3.09344	0.00509808
UNC13A	UNC13A	4.72134	50.7826	6.60905e-49
ABCA9	ABCA9	4.72104	6.01687	1.30204e-05
FLG2	FLG2	4.69379	2.29576	0.0238441
TNFRSF1B	TNFRSF1B	4.67059	34.1868	1.03771e-32
PCDH1	PCDH1	4.66717	40.7189	4.14949e-39
SH3RF3	SH3RF3	4.66516	2.96322	0.00658282
EBI3	EBI3	4.63496	9.00858	2.25475e-08
CD22	CD22	4.61389	2.2622	0.0254406
MIR7846	MIR7846	4.61009	2.25786	0.0256631
IL1RAPL1	IL1RAPL1	4.60658	4.04929	0.000750373
CNTN5	CNTN5	4.60108	10.6612	6.15633e-10
LAMP3	LAMP3	4.59632	76.6565	2.09287e-74
S100A9	S100A9	4.59622	2.16193	0.0308532
CH25H	CH25H	4.54972	3.80047	0.00124055
MYCT1	MYCT1	4.54719	2.67663	0.0115285
SLC28A3	SLC28A3	4.53438	3.88951	0.00103809
LOC440416	LOC440416	4.53247	2.80432	0.00898746
PABPC1P2	PABPC1P2	4.52838	2.08723	0.0354805
FAM225B	FAM225B	4.50346	2.13027	0.032734
C20orf195	C20orf195	4.50346	2.13027	0.032734
SCTR	SCTR	4.49547	2.67023	0.0116642
PNMT	PNMT	4.44988	2.46524	0.0172688
ZNF649	ZNF649	4.44848	3.61321	0.00180272
IL1R2	IL1R2	4.43543	2.64121	0.0123323
ACPP	ACPP	4.4308	11.1464	2.15231e-10
CLCA2	CLCA2	4.42902	3.60561	0.00182704
VAV1	VAV1	4.39543	1.68429	0.0743931
RAB44	RAB44	4.3839	1.7853	0.0618525
CES1P2	CES1P2	4.37979	2.45538	0.0176297
IL19	IL19	4.35962	10.4846	9.03352e-10
CNTD2	CNTD2	4.35285	2.50902	0.0158782
FAM172BP	FAM172BP	4.35094	1.85183	0.0547516
TSPEAR-AS1	TSPEAR-AS1	4.3416	1.84213	0.0557594
MIR3189	MIR3189	4.33527	5.95854	1.47371e-05
SLC35D3	SLC35D3	4.30438	1.8046	0.0597638
MAGED1	MAGED1	4.30341	24.9513	1.02392e-23
SERPINB2	SERPINB2	4.29671	5.89808	1.67026e-05
RTN4RL1	RTN4RL1	4.28915	2.40721	0.0193575
LOC400706	LOC400706	4.28389	3.38296	0.00284712
SPTA1	SPTA1	4.27761	1.74634	0.0663394
LOC339260	LOC339260	4.25399	1.54741	0.0949815
CNIH3	CNIH3	4.2262	3.21534	0.00399899
EHF	EHF	4.19525	68.0624	6.50646e-66
LOC100129520	LOC100129520	4.19211	1.72541	0.0688759
FAM155A-IT1	FAM155A-IT1	4.19211	1.72541	0.0688759
PDGFRA	PDGFRA	4.18969	1.70748	0.0711758
KRTAP4-1	KRTAP4-1	4.18969	1.70748	0.0711758
CHRDL1	CHRDL1	4.18411	16.8461	7.38416e-16
MGC27382	MGC27382	4.16941	1.70287	0.0717334
LOC101928571	LOC101928571	4.14074	1.62867	0.0819604
ABCA8	ABCA8	4.13528	104.547	8.53125e-102
DPP4	DPP4	4.12537	2.14161	0.0320443
POTED	POTED	4.11928	1.58588	1
NOS3	NOS3	4.11928	1.58588	1
IL33	IL33	4.11649	4.12442	0.0006447
TFEC	TFEC	4.09655	4.29933	0.000455253
DHRS2	DHRS2	4.09395	11.4741	1.04351e-10
LINC00648	LINC00648	4.09204	3.02037	0.00588967
GDF15	GDF15	4.07939	97.4872	7.34052e-95
MEFV	MEFV	4.07464	17.7967	9.22164e-17
LOC101928495	LOC101928495	4.05233	1.38014	1
CLDN16	CLDN16	4.04182	2.07512	0.036305
PRLR	PRLR	4.0409	3.86469	0.00108992
ZIC1	ZIC1	4.03597	2.82435	0.00862356
LINC01234	LINC01234	4.03565	7.14005	1.2344e-06
KCTD8	KCTD8	3.99119	1.50026	1
BCL2L10	BCL2L10	3.98214	2.83949	0.00837756
KCND3	KCND3	3.9651	1.47611	1
ESM1	ESM1	3.94964	10.2589	1.49155e-09
LINC01118	LINC01118	3.94304	1.83978	0.0560016
GAS2L2	GAS2L2	3.93801	1.41234	1
ZNF467	ZNF467	3.93304	10.4614	9.51476e-10
INPP5D	INPP5D	3.92363	7.53956	5.24715e-07
SVILP1	SVILP1	3.91655	2.4781	0.016863
CD6	CD6	3.90637	1.34167	1
LINC01204	LINC01204	3.89622	2.64733	0.0121887
GGT5	GGT5	3.89291	2.72466	0.0105164
HSD17B14	HSD17B14	3.85901	1.82144	0.057938
NECAB2	NECAB2	3.85623	3.31499	0.00326839
KIAA1456	KIAA1456	3.85448	4.50531	0.000300548
ZNF625	ZNF625	3.84198	1.50368	0.10279
LOC101927139	LOC101927139	3.81313	14.6486	9.8043e-14
SHC4	SHC4	3.79439	9.90209	3.23634e-09
ACTL8	ACTL8	3.78021	9.9986	2.63679e-09
GPR85	GPR85	3.77039	1.70158	0.0718887
C6orf58	C6orf58	3.76712	4.47384	0.00032159
TBX2	TBX2	3.7605	16.1066	3.78142e-15
FAM9B	FAM9B	3.72963	3.35103	0.00303534
SCARA5	SCARA5	3.695	17.4688	1.88485e-16
LOC400863	LOC400863	3.69123	1.441	0.114602
PI3	PI3	3.66461	59.3294	2.55896e-57
HBE1	HBE1	3.63963	2.10048	0.0346253
CES1	CES1	3.63887	4.15227	0.000613127
LCN2	LCN2	3.63774	84.9514	1.4404e-82
DUSP6	DUSP6	3.62056	63.5408	1.73017e-61
SEMA6B	SEMA6B	3.6057	11.2348	1.77676e-10
GFY	GFY	3.59702	4.74532	0.000184042
SHC2	SHC2	3.58592	3.86803	0.00108349
SLC17A7	SLC17A7	3.57553	2.84813	0.00824558
KCNJ6	KCNJ6	3.56983	26.4949	3.37398e-25
ZNF93	ZNF93	3.55503	6.07857	1.15207e-05
PLLP	PLLP	3.55477	20.7133	1.36293e-19
NTSR1	NTSR1	3.54616	1.78571	0.0618236
APOE	APOE	3.54463	8.41329	8.02016e-08
IL2RG	IL2RG	3.54112	1.53184	0.0976879
OTOF	OTOF	3.53932	1.50488	0.102582
SPINT1	SPINT1	3.53861	3.67391	0.00159708
RPSAP52	RPSAP52	3.53739	3.74563	0.0013805
SLC7A8	SLC7A8	3.52649	1.9606	0.0449201
CCNYL2	CCNYL2	3.52359	13.6732	8.3564e-13
SVEP1	SVEP1	3.50962	95.7347	3.32154e-93
PCDH17	PCDH17	3.5075	48.847	4.83867e-47
TCF21	TCF21	3.50691	3.66767	0.00161614
LINC00518	LINC00518	3.4929	2.1045	0.0343618
STAP2	STAP2	3.48681	17.5216	1.68469e-16
SDR16C5	SDR16C5	3.47409	30.4145	4.84808e-29
PDCD1	PDCD1	3.46291	1.37136	0.129514
MDK	MDK	3.45407	86.8145	2.30302e-84
SPRY1	SPRY1	3.4382	44.4951	8.87166e-43
CYP2G1P	CYP2G1P	3.42921	1.95249	0.0456109
BMP3	BMP3	3.42804	1.35892	0.132205
RBP4	RBP4	3.39838	1.97155	0.0440523
CLEC2B	CLEC2B	3.39371	10.2225	1.6193e-09
CR2	CR2	3.38859	1.33415	0.138709
LOC441666	LOC441666	3.38617	1.36501	0.130846
COL6A3	COL6A3	3.36602	3.84102	0.00114388
DKFZP434A062	DKFZP434A062	3.36445	1.35355	0.133605
FAM133A	FAM133A	3.35893	42.8391	3.78449e-41
MMP3	MMP3	3.34207	1.31306	0.143826
GYG2	GYG2	3.33876	3.21498	0.00399992
TNFSF15	TNFSF15	3.33848	75.2828	4.47702e-73
KLRG2	KLRG2	3.33818	4.45985	0.000330717
CD33	CD33	3.32989	17.3353	2.50157e-16
SLITRK6	SLITRK6	3.32114	53.0796	3.75279e-51
MACC1	MACC1	3.31372	1.78736	0.0617019
TEX15	TEX15	3.30358	1.85618	0.0542645
HCG26	HCG26	3.29633	1.78907	0.0615374
TMEM200A	TMEM200A	3.27968	12.9894	3.7175e-12
TMEM178B	TMEM178B	3.27831	1.71409	0.0702849
TRIB2	TRIB2	3.27811	32.4107	5.51381e-31
C20orf96	C20orf96	3.26913	1.77513	0.0629885
CPEB1	CPEB1	3.26451	1.68428	0.0743931
ST3GAL5-AS1	ST3GAL5-AS1	3.2592	1.7574	0.0650255
NR5A2	NR5A2	3.2538	3.08222	0.00521508
ITGB2	ITGB2	3.25339	12.0317	3.07e-11
TRPV3	TRPV3	3.2502	3.8749	0.00107028
CD163L1	CD163L1	3.23741	16.7221	9.68437e-16
PGF	PGF	3.22945	4.24826	0.000503443
CALCRL	CALCRL	3.22824	2.36156	0.0210909
KLF15	KLF15	3.22727	2.42416	0.0187384
MUSK	MUSK	3.22133	5.19038	7.31046e-05
FLG-AS1	FLG-AS1	3.22123	4.89978	0.000133983
RNF125	RNF125	3.21971	21.015	6.93891e-20
PDE4B	PDE4B	3.21964	53.7709	8.04117e-52
LINC00665	LINC00665	3.21065	11.2214	1.82693e-10
GALNT18	GALNT18	3.20043	16.3858	2.02646e-15
IFI6	IFI6	3.18476	114.575	1.19857e-111
GRHL3	GRHL3	3.17774	1.65864	0.0778161
ST8SIA6	ST8SIA6	3.16658	2.23986	0.0265708
MIR4450	MIR4450	3.16287	1.59919	0.0864461
LRRC25	LRRC25	3.15236	1.60252	0.08588
TNFSF8	TNFSF8	3.14578	4.45655	0.000332538
HMGA2	HMGA2	3.09185	48.7869	5.45359e-47
LINC01312	LINC01312	3.06649	4.26401	0.000488658
AADACP1	AADACP1	3.06257	7.23873	9.93841e-07
ANGPTL2	ANGPTL2	3.06168	24.4872	2.89292e-23
MIR26A2	MIR26A2	3.06014	1.44121	0.114567
DHRS9	DHRS9	3.05524	1.45043	0.112834
MUC2	MUC2	3.05521	1.96033	0.0449374
NTNG2	NTNG2	3.05378	4.30658	0.000450021
COX7B2	COX7B2	3.05338	1.48202	0.106901
ST6GALNAC1	ST6GALNAC1	3.05328	2.10044	0.0346253
WFDC13	WFDC13	3.04229	1.4492	0.113087
TMPRSS2	TMPRSS2	3.03606	1.50888	0.101938
CXCL1	CXCL1	3.02363	83.1158	9.20616e-81
ATP10B	ATP10B	3.02311	3.05407	0.00550462
ADORA1	ADORA1	3.01511	4.21948	0.000533457
GALNT5	GALNT5	3.01376	1.39671	0.12412
MIR146A	MIR146A	2.9995	2.53827	0.0150191
CNTNAP2	CNTNAP2	2.99414	1.37569	0.128795
CXCL8	CXCL8	2.98778	67.9845	7.47411e-66
FAM216B	FAM216B	2.97499	2.01197	0.0408852
VNN 1.00	VNN 1.00	2.97344	8.30377	1.01339e-07
LINC00460	LINC00460	2.97281	1.44786	0.113344
PNCK	PNCK	2.96761	1.3919	0.125267
ABCA10	ABCA10	2.94546	25.9331	1.16194e-24
RASGRF2-AS1	RASGRF2-AS1	2.94023	3.12364	0.00481126
TGFA	TGFA	2.93548	66.6706	1.48052e-64
LIPH	LIPH	2.93535	37.8927	2.56456e-36
WISP1	WISP1	2.92901	2.05938	0.0373877
KCND2	KCND2	2.92572	2.08677	0.0355096
ITGA2	ITGA2	2.90746	94.4094	6.38507e-92
GPRC5C	GPRC5C	2.90129	20.8945	9.0861e-20
DNAH3	DNAH3	2.90087	3.69122	0.00154177
CHST6	CHST6	2.88375	6.94615	1.86053e-06
C2CD4A	C2CD4A	2.8825	8.00322	1.92854e-07
ADAMTS20	ADAMTS20	2.88216	3.57682	0.00192706
COL9A2	COL9A2	2.87134	6.11417	1.07373e-05
CIITA	CIITA	2.83586	6.81203	2.48614e-06
SLC7A4	SLC7A4	2.83399	1.67768	0.0752959
TYRP1	TYRP1	2.83223	11.3085	1.50685e-10
CNTN1	CNTN1	2.82558	2.56603	0.0142574
MATK	MATK	2.81692	3.90507	0.00100696
LRRC55	LRRC55	2.81026	2.09862	0.0347285
ALDH1A1	ALDH1A1	2.79836	1.59443	0.0872463
PTPRO	PTPRO	2.79781	40.7784	3.6629e-39
OSCAR	OSCAR	2.78371	2.287	0.0242408
QPRT	QPRT	2.78121	40.8281	3.30665e-39
PTGFR	PTGFR	2.75717	20.9669	7.72201e-20
FGL1	FGL1	2.75055	1.99508	0.0421631
PTPN22	PTPN22	2.74522	2.61263	0.0130422
POU5F1P3	POU5F1P3	2.74252	2.21667	0.0277442
IGFL2	IGFL2	2.73588	2.3242	0.0225983
ADAMTS5	ADAMTS5	2.73564	47.3977	1.20236e-45
WDR86	WDR86	2.72648	8.03061	1.81666e-07
STEAP2	STEAP2	2.72482	21.9334	8.75723e-21
IL4R	IL4R	2.72348	64.0003	6.43547e-62
KCNQ5	KCNQ5	2.72341	3.21739	0.00398605
KCNK6	KCNK6	2.71825	2.58207	0.0138168
IL24	IL24	2.71685	14.1755	2.79266e-13
VIT	VIT	2.7125	3.9911	0.000847294
ACP5	ACP5	2.7112	1.61256	0.0844168
DBX2	DBX2	2.7105	8.37126	8.78453e-08
PECAM1	PECAM1	2.70414	4.60442	0.000245377
CYP4X1	CYP4X1	2.68276	4.27234	0.000481293
WNT6	WNT6	2.67769	1.76873	0.063764
MIR5703	MIR5703	2.67675	1.43421	0.116043
IGFBP1	IGFBP1	2.67429	12.8152	5.44193e-12
ANGPTL4	ANGPTL4	2.66261	32.5788	3.77453e-31
PVRL4	PVRL4	2.65817	5.45092	4.27579e-05
CXCL3	CXCL3	2.65741	26.3788	4.33112e-25
ZMYND15	ZMYND15	2.65425	1.5697	0.0912212
KIT	KIT	2.64237	1.41941	0.119127
S100P	S100P	2.64197	4.45515	0.000333432
CPZ	CPZ	2.64096	13.649	8.79436e-13
MIR147B	MIR147B	2.63926	3.24103	0.00379981
ACSM4	ACSM4	2.63658	1.88457	0.0514538
ANKRD20A12P	ANKRD20A12P	2.63654	5.87176	1.76157e-05
FOLR1	FOLR1	2.62525	108.028	3.38443e-105
CHST2	CHST2	2.61663	22.2807	4.02034e-21
PPFIA4	PPFIA4	2.61446	3.38379	0.00284272
SHROOM2	SHROOM2	2.59844	26.289	5.23677e-25
TMC8	TMC8	2.59685	1.77352	0.0631569
ASPRV1	ASPRV1	2.59306	1.76977	0.0636388
GPC4	GPC4	2.59229	1.34266	0.136381
ANKRD20A5P	ANKRD20A5P	2.58867	5.38262	4.91191e-05
PTCHD4	PTCHD4	2.56912	20.4142	2.65169e-19
C11orf96	C11orf96	2.56398	6.78441	2.63054e-06
MMP15	MMP15	2.55964	39.5261	6.17177e-38
IL6	IL6	2.55553	64.4573	2.33001e-62
FLG	FLG	2.54375	12.8552	4.98295e-12
PXT1	PXT1	2.53862	1.43557	0.115821
PHLDA1	PHLDA1	2.52652	83.0186	1.07951e-80
IFI27	IFI27	2.52589	13.21	2.29204e-12
LOC101927501	LOC101927501	2.52256	1.64177	0.0800789
GALNT6	GALNT6	2.51962	8.73878	4.04193e-08
ZNF516	ZNF516	2.51955	15.033	4.19822e-14
LOC101929319	LOC101929319	2.51254	6.01799	1.29966e-05
TET1	TET1	2.51207	10.854	4.03135e-10
FBXO2	FBXO2	2.51183	7.94968	2.14912e-07
FCGR1A	FCGR1A	2.50652	2.65853	0.0119323
VWCE	VWCE	2.50636	6.65234	3.50019e-06
FIBIN	FIBIN	2.5017	10.7603	4.96231e-10
LYPLAL1-AS1	LYPLAL1-AS1	2.49989	1.34274	0.136376
LYPD6B	LYPD6B	2.49941	26.839	1.5548e-25
SRGAP3	SRGAP3	2.49845	3.22276	0.00394567
TRIM22	TRIM22	2.49528	13.8285	6.01297e-13
CTSS	CTSS	2.49359	63.8088	9.65629e-62
LPAR1	LPAR1	2.49236	54.1731	3.3619e-52
UCA1	UCA1	2.48916	3.77732	0.00129913
POU2F2	POU2F2	2.48727	6.32057	7.02399e-06
SLC43A1	SLC43A1	2.48362	10.3812	1.13743e-09
KCNJ2	KCNJ2	2.48261	18.8937	8.0237e-18
CITED4	CITED4	2.48116	23.38	3.43197e-22
LRG1	LRG1	2.4628	1.94887	0.04593
SENCR	SENCR	2.45395	9.88159	3.37821e-09
KCNJ2-AS1	KCNJ2-AS1	2.45263	3.06218	0.00542341
DUSP4	DUSP4	2.44922	53.0679	3.76101e-51
KCNK2	KCNK2	2.43721	34.2217	9.66268e-33
MIR3650	MIR3650	2.43153	1.58132	0.0893258
SLC26A3	SLC26A3	2.43126	1.67865	0.075183
EFR3B	EFR3B	2.42536	2.18714	0.0293917
LOC283731	LOC283731	2.41749	1.53937	0.0963977
ISLR2	ISLR2	2.41436	12.2282	2.00793e-11
IL17RD	IL17RD	2.40724	25.1374	6.77335e-24
HS3ST3A1	HS3ST3A1	2.40228	4.37651	0.000390356
CPA3	CPA3	2.40154	2.25386	0.025867
FCGRT	FCGRT	2.39976	6.05314	1.21228e-05
RAPGEF4	RAPGEF4	2.39807	20.4659	2.37207e-19
STEAP1	STEAP1	2.39125	19.3017	3.27309e-18
CASC15	CASC15	2.3906	5.71401	2.44782e-05
CHRNA9	CHRNA9	2.38758	12.8536	4.992e-12
ANTXR2	ANTXR2	2.38523	48.5731	8.76142e-47
SPRY4	SPRY4	2.38074	8.55641	5.96083e-08
CEL	CEL	2.37748	3.72768	0.00143144
SLC2A3	SLC2A3	2.37359	52.4903	1.38827e-50
DAPK1	DAPK1	2.36169	77.2055	6.24028e-75
FAM167A	FAM167A	2.36078	9.20374	1.45717e-08
ZNF711	ZNF711	2.35879	7.75062	3.33509e-07
MAGEA3	MAGEA3	2.3565	26.472	3.53554e-25
SERPINE2	SERPINE2	2.35488	132.385	2.47656e-129
DTX4	DTX4	2.34813	42.8202	3.89663e-41
WNT16	WNT16	2.34133	3.80168	0.001238
ASGR1	ASGR1	2.33903	1.64138	0.0801343
C14orf132	C14orf132	2.33777	30.9265	1.57033e-29
KLHL1	KLHL1	2.32884	10.7021	5.62864e-10
LINC01452	LINC01452	2.31718	1.6826	0.0746209
ACVR1C	ACVR1C	2.31464	2.52096	0.0154961
COLGALT2	COLGALT2	2.30606	8.1552	1.38828e-07
LOC100506178	LOC100506178	2.30313	6.57733	4.09225e-06
C3orf65	C3orf65	2.29497	6.90338	2.04192e-06
MMP14	MMP14	2.29457	35.5559	4.72888e-34
SLIT2	SLIT2	2.29215	51.1459	2.92819e-49
EDNRA	EDNRA	2.28072	41.571	6.20717e-40
CXCL2	CXCL2	2.27216	37.7687	3.37483e-36
FGF18	FGF18	2.2693	4.29866	0.000455727
THSD7A	THSD7A	2.26628	7.99939	1.94351e-07
C15orf48	C15orf48	2.26221	5.46671	4.13697e-05
PRRX2	PRRX2	2.2539	19.9117	8.27471e-19
PTPRH	PTPRH	2.24153	2.69873	0.0110641
PLAG1	PLAG1	2.23818	20.6434	1.58858e-19
XAF1	XAF1	2.23783	2.43944	0.0182026
SLC24A3	SLC24A3	2.23487	1.94529	0.0461734
NTN1	NTN1	2.23232	8.21802	1.21669e-07
THBD	THBD	2.2274	15.9654	5.20715e-15
HID1	HID1	2.22406	1.58846	0.0881854
KIF5C	KIF5C	2.22243	23.0101	7.79424e-22
NIPAL1	NIPAL1	2.21526	4.23568	0.000517052
RASGRP2	RASGRP2	2.20731	1.97196	0.0440206
GPR141	GPR141	2.20655	7.61598	4.46804e-07
DUSP5	DUSP5	2.19752	30.8931	1.68317e-29
SPRED3	SPRED3	2.19439	8.16904	1.35141e-07
ASS1	ASS1	2.18643	25.9498	1.12442e-24
SLC16A6	SLC16A6	2.18423	24.612	2.1808e-23
G0S2	G0S2	2.18417	6.58792	4.00401e-06
ANK1	ANK1	2.17635	17.391	2.24098e-16
NEU4	NEU4	2.17529	14.9042	5.60544e-14
SH3TC2	SH3TC2	2.1731	19.2074	4.00843e-18
CSMD3	CSMD3	2.17291	6.74141	2.8899e-06
KLRC2	KLRC2	2.17204	28.0587	9.84491e-27
ETV5	ETV5	2.16745	30.5381	3.70408e-29
ETV4	ETV4	2.16409	40.8794	2.97501e-39
SLCO4A1	SLCO4A1	2.16087	68.5935	2.08974e-66
ARRDC4	ARRDC4	2.1606	13.6722	8.35642e-13
MALL	MALL	2.15774	9.74942	4.48401e-09
MCF2L2	MCF2L2	2.15759	6.90484	2.03692e-06
MMP13	MMP13	2.15232	1.94153	0.04646
PTPRU	PTPRU	2.14774	34.5107	5.05656e-33
INHBA	INHBA	2.14733	4.15161	0.000613755
GJD3	GJD3	2.14029	9.94654	2.94104e-09
LOC102467147	LOC102467147	2.13603	1.35647	0.13282
SBK3	SBK3	2.13459	1.50437	0.102671
CACNG6	CACNG6	2.13181	6.42794	5.61825e-06
FAIM2	FAIM2	2.12819	1.65109	0.0788382
FAM84B	FAM84B	2.12384	23.3398	3.73121e-22
OAS2	OAS2	2.12002	9.97553	2.77254e-09
ZNF114	ZNF114	2.11995	4.94944	0.000121148
SPINK4	SPINK4	2.11858	8.68746	4.5157e-08
UBE2L6	UBE2L6	2.11804	9.61902	5.93814e-09
SLCO4A1-AS1	SLCO4A1-AS1	2.11803	39.3976	8.202e-38
PRDM8	PRDM8	2.11314	9.20558	1.4529e-08
RAMP1	RAMP1	2.11091	1.4804	0.107165
RRAD	RRAD	2.11069	3.42291	0.002629
MAOB	MAOB	2.10437	18.1567	4.21779e-17
PTGS2	PTGS2	2.1035	42.2709	1.30575e-40
PTX3	PTX3	2.1022	9.35602	1.04925e-08
KCNS3	KCNS3	2.10194	5.83866	1.88178e-05
RCAN2	RCAN2	2.10163	1.61156	0.0845638
SLC30A3	SLC30A3	2.09773	1.96617	0.0444792
SLIT2-IT1	SLIT2-IT1	2.0908	2.68469	0.0113581
LINC00839	LINC00839	2.0833	14.9869	4.65667e-14
FST	FST	2.08243	20.7516	1.25287e-19
CCDC3	CCDC3	2.08187	17.5717	1.51052e-16
MUC15	MUC15	2.07623	2.22454	0.0273221
NOTUM	NOTUM	2.07398	9.95929	2.86571e-09
RAB27B	RAB27B	2.07344	37.6204	4.59649e-36
HES2	HES2	2.07182	5.22618	6.78749e-05
NT5E	NT5E	2.07024	53.8256	7.28066e-52
LGR6	LGR6	2.06895	26.6753	2.2399e-25
CXCL10	CXCL10	2.06895	1.33123	0.139437
ACTBL2	ACTBL2	2.0673	4.95895	0.000118936
ABCA1	ABCA1	2.06527	35.1727	1.13222e-33
ARL14EPL	ARL14EPL	2.06431	1.77336	0.063167
ICAM1	ICAM1	2.05664	56.2269	3.05515e-54
ITGB2-AS1	ITGB2-AS1	2.05346	6.17979	9.37687e-06
CYP2A6	CYP2A6	2.04902	2.00833	0.0410956
SMOX	SMOX	2.04287	12.4046	1.37096e-11
WFDC3	WFDC3	2.04092	2.39688	0.0197262
LHX8	LHX8	2.03838	4.65884	0.000220954
SPP1	SPP1	2.03603	1.98012	0.04331
PPAPDC1A	PPAPDC1A	2.03398	5.246	6.51773e-05
DYSF	DYSF	2.02928	9.96434	2.83667e-09
FOXO1	FOXO1	2.02893	30.993	1.36735e-29
LRRN1	LRRN1	2.02809	3.14058	0.00463875
MYO1D	MYO1D	2.025	2.29194	0.0240042
FLI1	FLI1	2.02115	27.1887	7.03414e-26
GPR110	GPR110	2.01817	1.3058	0.1456
CCDC69	CCDC69	2.01624	11.0294	2.79421e-10
MAPK13	MAPK13	2.01442	10.0588	2.30875e-09
LOC100129940	LOC100129940	2.01435	23.3451	3.70221e-22
KCNJ15	KCNJ15	2.01378	5.19369	7.25956e-05
SORCS2	SORCS2	2.00694	13.0514	3.22971e-12
SLC29A4	SLC29A4	1.99839	4.75221	0.00018125
CEBPA	CEBPA	1.99292	1.42698	0.117498
MME	MME	1.98926	4.43747	0.000345279
GPR68	GPR68	1.98783	2.15645	0.0311441
COL6A2	COL6A2	1.98327	5.40819	4.66563e-05
B3GNT5	B3GNT5	1.9815	40.1793	1.40385e-38
LOC101929574	LOC101929574	1.98022	1.82898	0.0571296
NOG	NOG	1.97133	16.0317	4.48163e-15
SAT1	SAT1	1.96055	28.7998	1.85621e-27
MAL2	MAL2	1.95943	31.892	1.77861e-30
LINC00565	LINC00565	1.9586	1.78627	0.0617916
TUBB4A	TUBB4A	1.95818	6.80075	2.547e-06
LIPG	LIPG	1.95428	11.882	4.20937e-11
PCDHB15	PCDHB15	1.94758	3.57273	0.00194296
ARL4C	ARL4C	1.94308	19.2142	3.96019e-18
C1orf140	C1orf140	1.94003	2.73321	0.0103466
TSPAN8	TSPAN8	1.93147	26.375	4.34495e-25
SAA1	SAA1	1.93035	10.2742	1.44192e-09
PTGER1	PTGER1	1.92839	3.00911	0.00602582
FDCSP	FDCSP	1.92572	1.76038	0.0646682
TNFSF14	TNFSF14	1.92038	5.33358	5.44533e-05
OR2B6	OR2B6	1.91894	11.9951	3.32778e-11
NID1	NID1	1.91461	47.7877	5.1567e-46
CCDC68	CCDC68	1.91414	21.1122	5.56962e-20
IGF2BP2	IGF2BP2	1.9139	47.3906	1.20236e-45
WNT10A	WNT10A	1.90848	1.56349	0.092128
FAM86FP	FAM86FP	1.90803	2.36481	0.0209522
TCP11L2	TCP11L2	1.90462	17.2626	2.90565e-16
IL27RA	IL27RA	1.90018	16.6833	1.05613e-15
CD5	CD5	1.89501	2.11191	0.0338784
TCN2	TCN2	1.88732	6.50696	4.74296e-06
KRT81	KRT81	1.88553	6.41319	5.78813e-06
EREG	EREG	1.88263	36.0709	1.4868e-34
CYP39A1	CYP39A1	1.8814	11.1892	1.96328e-10
DENND1C	DENND1C	1.8734	1.86597	0.0532591
DNAH2	DNAH2	1.87238	1.86682	0.0531924
SSPO	SSPO	1.87061	2.47142	0.017062
CELF2	CELF2	1.86851	21.9746	7.99821e-21
DDIT4L	DDIT4L	1.86801	7.31775	8.40563e-07
LOC100505817	LOC100505817	1.86675	1.94827	0.0459831
FAM132B	FAM132B	1.86604	8.70986	4.30968e-08
F2RL1	F2RL1	1.86513	14.3581	1.86008e-13
TNFAIP6	TNFAIP6	1.86468	15.9338	5.5846e-15
RAPGEF4-AS1	RAPGEF4-AS1	1.86087	1.37356	0.129169
CT83	CT83	1.85893	21.764	1.28279e-20
MIR664B	MIR664B	1.85721	1.69111	0.0734366
FUT8-AS1	FUT8-AS1	1.85668	5.16162	7.76226e-05
BHLHE41	BHLHE41	1.85263	12.9079	4.43141e-12
DSC3	DSC3	1.84902	41.0306	2.12689e-39
AQP5	AQP5	1.83974	3.37402	0.00289968
C1S	C1S	1.83419	47.391	1.20236e-45
HIST1H2BE	HIST1H2BE	1.82938	2.18107	0.0297301
GCNT4	GCNT4	1.82823	2.83863	0.00838478
CCDC102B	CCDC102B	1.82783	5.21541	6.94913e-05
HS3ST1	HS3ST1	1.82266	4.05212	0.000747941
TXK	TXK	1.80897	2.02514	0.0398845
IFITM10	IFITM10	1.80886	3.45522	0.00246138
WNT8B	WNT8B	1.8007	1.47957	0.107311
ST18	ST18	1.78811	2.76077	0.00979247
MYH15	MYH15	1.78749	2.60151	0.0133174
IL1A	IL1A	1.78602	19.6137	1.62511e-18
PSAPL1	PSAPL1	1.78394	2.94801	0.00678334
CCDC154	CCDC154	1.78144	2.2097	0.0281004
TRIML2	TRIML2	1.77647	1.60629	0.0853305
COLQ	COLQ	1.77477	3.0965	0.00507069
PRTG	PRTG	1.77386	24.6721	1.90833e-23
TMEM52B	TMEM52B	1.77347	7.52288	5.44167e-07
CA11	CA11	1.77109	7.03733	1.52771e-06
IL17C	IL17C	1.77041	1.4017	0.123102
ARHGAP24	ARHGAP24	1.76804	10.9054	3.63927e-10
KC6	KC6	1.75992	2.74419	0.0101386
SULF1	SULF1	1.75969	30.1066	9.66235e-29
SULF2	SULF2	1.75489	49.7398	6.43601e-48
PDE4C	PDE4C	1.75344	2.25366	0.0258721
HRNR	HRNR	1.75068	1.83023	0.0569899
TJP3	TJP3	1.74736	3.78943	0.00126915
ADAM8	ADAM8	1.74592	4.47647	0.000319821
SUSD2	SUSD2	1.74501	9.24432	1.33409e-08
CADM2	CADM2	1.74451	1.83565	0.0564172
SHISA3	SHISA3	1.74189	3.0464	0.00558534
ZNF285	ZNF285	1.74061	2.82592	0.00860617
LOC401177	LOC401177	1.73378	1.32225	0.141786
HIST1H1T	HIST1H1T	1.72724	1.51083	0.101573
FZD8	FZD8	1.72659	14.9353	5.23177e-14
MMP2	MMP2	1.72569	50.7651	6.73172e-49
C3	C3	1.72505	68.4188	2.9884e-66
PTP4A3	PTP4A3	1.72293	1.66207	0.0773241
GJA1	GJA1	1.72209	40.5786	5.66341e-39
GPR115	GPR115	1.71925	5.3444	5.32174e-05
JAKMIP2	JAKMIP2	1.71204	1.54756	0.0949815
MLPH	MLPH	1.71045	3.32488	0.00320079
IGSF9	IGSF9	1.70774	3.98418	0.000856572
LYPD3	LYPD3	1.70558	3.2571	0.00367931
LPHN1	LPHN1	1.70139	20.7892	1.15341e-19
NATD1	NATD1	1.69994	9.70197	4.96004e-09
ANO3	ANO3	1.69944	8.54612	6.0748e-08
SPRY2	SPRY2	1.69327	22.0669	6.52219e-21
CORO1A	CORO1A	1.69318	4.55771	0.000269843
AQP2	AQP2	1.6904	1.70664	0.0712706
FBP1	FBP1	1.68797	1.935	0.0469848
HAS2	HAS2	1.68775	9.68447	5.13552e-09
IL17RE	IL17RE	1.68751	1.51575	0.10071
TGFBR2	TGFBR2	1.68601	46.5379	8.16467e-45
SAA2-SAA4	SAA2-SAA4	1.68262	3.6443	0.00169069
KCNQ4	KCNQ4	1.68202	2.63807	0.0124032
SNORA2B	SNORA2B	1.68146	4.14311	0.000622276
SLC30A8	SLC30A8	1.68113	2.40636	0.0193849
SAA2	SAA2	1.67721	5.53564	3.56093e-05
ITGBL1	ITGBL1	1.67641	2.85734	0.00809271
PPAP2B	PPAP2B	1.67381	30.7421	2.36622e-29
VGF	VGF	1.67179	3.57432	0.00193664
ANKRD29	ANKRD29	1.67082	11.365	1.33215e-10
RGS16	RGS16	1.67019	10.6285	6.58655e-10
GDA	GDA	1.6683	46.9543	3.17971e-45
SEMA4B	SEMA4B	1.66728	26.9419	1.23422e-25
MIR6502	MIR6502	1.66635	1.32054	0.142143
PCAT6	PCAT6	1.66561	1.35868	0.132257
EFHD1	EFHD1	1.66372	4.33776	0.000422433
SPINT2	SPINT2	1.66338	8.38147	8.59024e-08
FAM101B	FAM101B	1.6622	30.0763	1.02888e-28
GDF1	GDF1	1.65889	5.00418	0.000108358
SLC1A3	SLC1A3	1.65811	17.924	6.92829e-17
SNORA36A	SNORA36A	1.65315	1.77754	0.0627579
ZNF662	ZNF662	1.65237	3.31296	0.00328001
CASC11	CASC11	1.64755	1.42493	0.117889
VAMP5	VAMP5	1.6474	2.14711	0.0317111
RFTN1	RFTN1	1.64575	37.63	4.5451e-36
NR0B1	NR0B1	1.6423	1.96459	0.0446004
BBC3	BBC3	1.64087	18.8074	9.68819e-18
LOC729970	LOC729970	1.63576	1.3229	0.141668
MAOA	MAOA	1.63192	11.9422	3.71117e-11
PRICKLE1	PRICKLE1	1.63163	13.8539	5.69727e-13
KANK4	KANK4	1.63021	5.44137	4.36503e-05
VLDLR-AS1	VLDLR-AS1	1.62935	3.25081	0.00372882
LOC101927905	LOC101927905	1.61659	2.41457	0.0191005
SLC39A8	SLC39A8	1.61454	33.9324	1.80052e-32
ZC3H12D	ZC3H12D	1.61442	5.19972	7.17752e-05
PDZK1IP1	PDZK1IP1	1.61321	4.02192	0.00079438
XDH	XDH	1.61213	1.51565	0.10071
TSPAN1	TSPAN1	1.6117	5.26291	6.30092e-05
SMPDL3B	SMPDL3B	1.60925	2.15323	0.0313448
TMEM132A	TMEM132A	1.60904	14.0449	3.71203e-13
SLITRK4	SLITRK4	1.60843	27.2625	6.00697e-26
CT62	CT62	1.60697	4.38102	0.000386723
PROM1	PROM1	1.60381	6.25366	8.04967e-06
KLRC4-KLRK1	KLRC4-KLRK1	1.60234	6.63331	3.64111e-06
NOX5	NOX5	1.60067	1.8142	0.0586809
TMEM171	TMEM171	1.59965	1.92269	0.0480231
CD177	CD177	1.59896	7.02347	1.57289e-06
ETNK2	ETNK2	1.59837	4.03404	0.000773221
TOX2	TOX2	1.5965	12.2645	1.85724e-11
CELF2-AS2	CELF2-AS2	1.5944	2.78673	0.00929926
BIK	BIK	1.59047	3.71578	0.0014681
CARD16	CARD16	1.59026	1.81739	0.0583443
FLRT3	FLRT3	1.58967	8.17198	1.34528e-07
SNORA48	SNORA48	1.58933	2.41085	0.0192277
GBP5	GBP5	1.58925	2.13615	0.0323625
ARHGEF4	ARHGEF4	1.58736	25.4218	3.57376e-24
PRDM1	PRDM1	1.58732	18.5497	1.72356e-17
FAM132A	FAM132A	1.58656	2.81488	0.00878277
LOC102724550	LOC102724550	1.58093	4.23382	0.000518932
ST3GAL5	ST3GAL5	1.57738	8.5025	6.63794e-08
FAM26E	FAM26E	1.57493	1.6242	0.0826437
CERS1	CERS1	1.56629	5.29762	5.86411e-05
FAM171A2	FAM171A2	1.5651	6.69754	3.1792e-06
TNFSF11	TNFSF11	1.56259	1.88979	0.0509955
SNORD10	SNORD10	1.55967	3.38933	0.00281531
TERT	TERT	1.55727	8.51652	6.43472e-08
CHST7	CHST7	1.55491	4.34514	0.000416169
PRKCH	PRKCH	1.5542	17.3582	2.4023e-16
SLC15A3	SLC15A3	1.55349	10.9175	3.54467e-10
TMCC3	TMCC3	1.55225	5.97624	1.4233e-05
SPATA32	SPATA32	1.55191	1.56365	0.092128
SEMA5A	SEMA5A	1.55165	1.8214	0.057938
PYCARDOS	PYCARDOS	1.54703	3.00801	0.006037
XKRX	XKRX	1.5467	3.26314	0.00363518
SNORA38B	SNORA38B	1.54572	2.92053	0.0071505
ZFHX2	ZFHX2	1.54234	3.93245	0.000951419
TMEM154	TMEM154	1.54168	10.0939	2.14206e-09
ID1	ID1	1.53779	28.2736	6.11613e-27
CASC14	CASC14	1.53656	1.55812	0.0930826
RIN3	RIN3	1.53636	5.54375	3.50935e-05
NR2F2-AS1	NR2F2-AS1	1.53574	1.89154	0.0508237
MIR1291	MIR1291	1.53473	4.74019	0.000186016
P2RX4	P2RX4	1.52293	5.37312	5.00735e-05
THSD4	THSD4	1.52153	29.6013	2.99028e-28
NRARP	NRARP	1.5209	11.951	3.6502e-11
SNORA34	SNORA34	1.51802	4.71032	0.000198139
DNER	DNER	1.51659	37.6389	4.50128e-36
CPA4	CPA4	1.51491	30.2183	7.52172e-29
ANPEP	ANPEP	1.51237	23.6508	1.86512e-22
H1F0	H1F0	1.50658	36.8995	2.31901e-35
CDKN1A	CDKN1A	1.50629	27.4942	3.54503e-26
JPH3	JPH3	1.5053	10.8913	3.74691e-10
GATSL3	GATSL3	1.50417	5.38949	4.84428e-05
FHOD3	FHOD3	1.5027	26.1123	7.8211e-25
HAS2-AS1	HAS2-AS1	1.50214	5.57857	3.26784e-05
TUBA8	TUBA8	1.50127	2.75103	0.00999896
PLEKHA7	PLEKHA7	1.50061	15.7223	8.8767e-15
ZNF395	ZNF395	1.50028	19.373	2.7879e-18
SOCS2	SOCS2	1.4986	4.88058	0.000139462
GCHFR	GCHFR	1.48872	10.8844	3.8015e-10
B4GALT6	B4GALT6	1.48865	11.8886	4.15343e-11
EPAS1	EPAS1	1.48729	34.4804	5.37408e-33
ANK3	ANK3	1.48492	14.7815	7.30847e-14
IGFBPL1	IGFBPL1	1.48404	4.30033	0.000454428
MYO1F	MYO1F	1.48394	2.23622	0.0267533
TESC	TESC	1.48336	14.5508	1.21942e-13
TXNIP	TXNIP	1.48293	16.5423	1.43285e-15
ITGA10	ITGA10	1.48018	2.93252	0.00698991
MAN1A1	MAN1A1	1.47705	33.7776	2.5285e-32
CTSB	CTSB	1.47581	42.4755	8.26441e-41
CPE	CPE	1.47305	25.1157	7.08452e-24
PLCB2	PLCB2	1.47166	2.04929	0.038134
PAPPA2	PAPPA2	1.47125	1.33339	0.138874
VEGFC	VEGFC	1.47099	23.7277	1.57712e-22
KLRC3	KLRC3	1.46574	7.99615	1.95385e-07
NOXA1	NOXA1	1.46542	4.5296	0.000285572
TMC6	TMC6	1.4624	7.07198	1.42235e-06
RAB43	RAB43	1.46224	6.66409	3.4187e-06
HOXA3	HOXA3	1.46187	12.3443	1.56023e-11
TMEM156	TMEM156	1.45817	10.097	2.13028e-09
ADM2	ADM2	1.45763	4.60468	0.000245377
LOC101928784	LOC101928784	1.45688	2.15651	0.0311441
ATP8B4	ATP8B4	1.45483	4.96938	0.00011641
KIAA1462	KIAA1462	1.4529	4.47078	0.000323521
SNAP25-AS1	SNAP25-AS1	1.44825	2.21081	0.0280496
PAQR5	PAQR5	1.4466	25.8375	1.43069e-24
SESN1	SESN1	1.44611	14.5431	1.23799e-13
FAM198B	FAM198B	1.44154	3.45528	0.00246138
LOXL2	LOXL2	1.43781	23.7787	1.42228e-22
SLC16A2	SLC16A2	1.43694	3.4949	0.00227211
SEMA3A	SEMA3A	1.43599	24.9432	1.03778e-23
RNU6ATAC	RNU6ATAC	1.43529	4.65442	0.000222591
KCNMB4	KCNMB4	1.43468	8.82601	3.33096e-08
FER1L4	FER1L4	1.43349	3.59627	0.00185861
FUT8	FUT8	1.43266	28.4851	3.78273e-27
GPRIN3	GPRIN3	1.43143	7.44517	6.40472e-07
ANK2	ANK2	1.43084	1.95005	0.045816
GYLTL1B	GYLTL1B	1.42984	7.77867	3.13303e-07
MATN3	MATN3	1.42851	8.28236	1.05743e-07
LOC101927318	LOC101927318	1.42799	2.1443	0.03187
SRPX2	SRPX2	1.42619	7.30598	8.60894e-07
HIST1H3J	HIST1H3J	1.42446	1.50685	0.102323
MIR6758	MIR6758	1.42214	2.37306	0.0206633
TNFSF4	TNFSF4	1.42172	1.73274	0.0679056
LOC101927843	LOC101927843	1.4207	3.42993	0.0025918
CASC8	CASC8	1.41974	5.53216	3.58718e-05
PGPEP1	PGPEP1	1.41776	16.6755	1.07222e-15
CCT6B	CCT6B	1.41678	1.49665	0.104128
IRAK2	IRAK2	1.41534	20.7074	1.37615e-19
APOBEC3C	APOBEC3C	1.41472	2.26801	0.025154
PDE6B	PDE6B	1.41444	1.41441	0.120257
FLJ32255	FLJ32255	1.41329	12.2813	1.79017e-11
TGM2	TGM2	1.41164	18.7121	1.19808e-17
VLDLR	VLDLR	1.41099	18.0768	5.00237e-17
CD74	CD74	1.40962	2.71899	0.0106347
CCDC71L	CCDC71L	1.4074	17.2532	2.96022e-16
HBQ1	HBQ1	1.4071	2.87315	0.00785492
KIAA1683	KIAA1683	1.40577	3.14232	0.00462509
RNF144B	RNF144B	1.40329	7.26945	9.32203e-07
MAGEA12	MAGEA12	1.40022	1.79367	0.0609651
DTNA	DTNA	1.39703	6.02153	1.29105e-05
LOC100507373	LOC100507373	1.39648	5.33884	5.38325e-05
KLRC4	KLRC4	1.39575	4.96892	0.000116461
LOC100507420	LOC100507420	1.38946	1.66872	0.0764657
PCDHB16	PCDHB16	1.38945	2.34855	0.0216003
SATB1	SATB1	1.38309	4.98132	0.000113594
CDCP1	CDCP1	1.38255	24.0729	7.39983e-23
MFSD2A	MFSD2A	1.38145	3.73464	0.00141106
TIMP1	TIMP1	1.38049	23.9702	9.32935e-23
GSDMC	GSDMC	1.37955	1.94535	0.0461734
ANKRD33B	ANKRD33B	1.37935	20.3553	3.01374e-19
SLC6A16	SLC6A16	1.37549	2.06198	0.0372106
BEST4	BEST4	1.37142	2.47171	0.0170552
GPR137B	GPR137B	1.37095	5.31429	5.67788e-05
KLRK1	KLRK1	1.36695	3.3181	0.0032463
RASSF9	RASSF9	1.36518	5.90413	1.65077e-05
GNG2	GNG2	1.36514	8.96127	2.48571e-08
TENM1	TENM1	1.3647	8.90422	2.80634e-08
FGF11	FGF11	1.36436	4.90249	0.000133384
LOC101928100	LOC101928100	1.36259	4.12131	0.000648092
CNTN2	CNTN2	1.35995	1.67223	0.0759855
LYL1	LYL1	1.35828	2.23854	0.026636
GAL3ST2	GAL3ST2	1.35609	1.49992	0.103482
SEMA7A	SEMA7A	1.35551	3.20164	0.00410628
THRB-AS1	THRB-AS1	1.35414	1.94669	0.0461198
HOXA4	HOXA4	1.34932	2.96163	0.00660472
ZMAT3	ZMAT3	1.34881	25.4401	3.44466e-24
DPH6-AS1	DPH6-AS1	1.34675	1.93338	0.0471305
SNORA63	SNORA63	1.34558	7.50764	5.62465e-07
S1PR1	S1PR1	1.3452	3.39994	0.00275158
COL6A1	COL6A1	1.34476	6.44062	5.47942e-06
LOC101927911	LOC101927911	1.3442	2.47243	0.0170367
SCN1A	SCN1A	1.34409	3.58512	0.00189751
KCNMA1	KCNMA1	1.34172	3.70743	0.00149344
RBPMS2	RBPMS2	1.34026	10.9191	3.53787e-10
GPRC5B	GPRC5B	1.33958	11.6738	6.69248e-11
NOV	NOV	1.33668	21.1608	5.02068e-20
LINC00520	LINC00520	1.33543	2.53051	0.0152285
ANKRD1	ANKRD1	1.3352	15.1978	2.90187e-14
CTSO	CTSO	1.33479	2.14458	0.0318574
STAG3	STAG3	1.3339	4.64495	0.000226365
ADAMTS7	ADAMTS7	1.33308	6.61616	3.7747e-06
CRIP3	CRIP3	1.33305	1.42381	0.118091
C12orf56	C12orf56	1.33128	4.65984	0.000220692
SNORA52	SNORA52	1.33087	3.70423	0.00150223
BTBD19	BTBD19	1.32578	6.03467	1.25741e-05
SHANK3	SHANK3	1.32529	8.03954	1.7873e-07
HLX	HLX	1.32128	9.59888	6.203e-09
TIAM1	TIAM1	1.32093	13.3075	1.86606e-12
HES7	HES7	1.31726	11.4053	1.21623e-10
JAK3	JAK3	1.31618	1.30256	0.146428
MEF2B	MEF2B	1.31493	2.22974	0.0270791
CAPN5	CAPN5	1.31324	3.9626	0.000892847
TINAGL1	TINAGL1	1.3132	16.7633	8.88379e-16
KBTBD11	KBTBD11	1.31191	2.23027	0.0270609
MIR4683	MIR4683	1.31084	2.95366	0.00670917
TRAPPC6A	TRAPPC6A	1.31009	1.36349	0.131215
SUGCT	SUGCT	1.30845	2.5716	0.0141128
MMD	MMD	1.30603	12.9262	4.25681e-12
ATP8A1	ATP8A1	1.30475	6.50802	4.73537e-06
CA9	CA9	1.3037	3.28716	0.00345639
MIR181B1	MIR181B1	1.30149	1.51094	0.101566
SCN2A	SCN2A	1.30006	10.9226	3.51484e-10
ARHGAP6	ARHGAP6	1.29993	1.67427	0.0756894
ORAI3	ORAI3	1.29946	7.80888	2.94397e-07
PTPRM	PTPRM	1.2994	25.3618	4.0821e-24
ISM1	ISM1	1.29855	4.93377	0.000124852
MTHFD2L	MTHFD2L	1.29716	9.00359	2.27501e-08
SMAGP	SMAGP	1.2945	10.1062	2.08856e-09
LACC1	LACC1	1.29443	11.6848	6.53562e-11
ST6GALNAC6	ST6GALNAC6	1.29355	25.6473	2.17193e-24
JSRP1	JSRP1	1.29148	1.73183	0.0679937
SNORA71D	SNORA71D	1.28817	4.8047	0.000163024
SRPX	SRPX	1.28499	6.90532	2.03652e-06
ERN 1.00	ERN 1.00	1.28444	11.171	2.04377e-10
IFI44L	IFI44L	1.28391	25.8356	1.43069e-24
AIF1L	AIF1L	1.28231	7.04744	1.4953e-06
FAIM3	FAIM3	1.28193	8.39213	8.39156e-08
HTR2C	HTR2C	1.2814	2.90738	0.00733589
LINC01391	LINC01391	1.27885	1.65696	0.0780869
FAAH2	FAAH2	1.27626	4.8792	0.000139742
RPL21P44	RPL21P44	1.27425	1.78612	0.0618004
PRR5-ARHGAP8	PRR5-ARHGAP8	1.2737	2.53742	0.0150432
RASGRF2	RASGRF2	1.27358	10.7543	5.02349e-10
HSPA6	HSPA6	1.27011	1.63184	0.0815031
FIBCD1	FIBCD1	1.26831	3.51963	0.00216255
ANO9	ANO9	1.26762	1.37364	0.129169
SLC4A11	SLC4A11	1.26722	10.278	1.43169e-09
SNORA80A	SNORA80A	1.26638	3.46187	0.00242774
SLPI	SLPI	1.2633	13.2091	2.29222e-12
F2R	F2R	1.26273	18.6985	1.23198e-17
HOXA2	HOXA2	1.26181	1.9453	0.0461734
HAPLN3	HAPLN3	1.26053	3.80927	0.00122149
IFITM1	IFITM1	1.25899	6.36218	6.45592e-06
SNORA71A	SNORA71A	1.25799	2.18812	0.0293576
HOXA5	HOXA5	1.2572	3.36591	0.00294875
LOC101929125	LOC101929125	1.25681	1.98607	0.0428389
WDFY2	WDFY2	1.25554	16.4036	1.95562e-15
RGMB-AS1	RGMB-AS1	1.25428	1.58112	0.0893487
FAP	FAP	1.25403	17.0039	5.16403e-16
SLC9A9	SLC9A9	1.24798	5.18658	7.36553e-05
SCARNA18	SCARNA18	1.24592	1.65068	0.0788513
KCNJ12	KCNJ12	1.24381	9.71942	4.78462e-09
NAMPT	NAMPT	1.24212	14.3029	2.10713e-13
MSRA	MSRA	1.24063	8.73024	4.11714e-08
LINC01268	LINC01268	1.24011	1.42086	0.118791
ALDH2	ALDH2	1.23741	18.2016	3.81612e-17
SCN1B	SCN1B	1.23687	6.20998	8.83065e-06
SGK223	SGK223	1.23646	11.9008	4.04594e-11
ARHGDIB	ARHGDIB	1.23609	7.93557	2.21775e-07
GRIN2D	GRIN2D	1.23534	4.05088	0.000748909
IL18R1	IL18R1	1.23433	4.82731	0.000155648
OSMR	OSMR	1.23388	29.4163	4.54826e-28
TSPAN18	TSPAN18	1.2335	6.37396	6.29343e-06
GSAP	GSAP	1.23116	4.59741	0.000248558
MIR5087	MIR5087	1.23027	2.65589	0.0119906
ZNF618	ZNF618	1.22943	16.1294	3.59783e-15
CASP1	CASP1	1.22747	4.35423	0.000408588
TMC5	TMC5	1.22424	13.2437	2.12981e-12
NFKBIA	NFKBIA	1.22339	19.8135	1.02978e-18
DNAJC12	DNAJC12	1.22264	7.10097	1.33675e-06
CHAC1	CHAC1	1.21924	2.44232	0.0181126
YPEL5	YPEL5	1.21609	15.2512	2.57929e-14
ZNF253	ZNF253	1.21465	5.67236	2.67357e-05
BACH1	BACH1	1.21392	25.3098	4.57796e-24
MAFF	MAFF	1.21299	7.60405	4.58315e-07
SLC7A2	SLC7A2	1.21074	23.7577	1.48594e-22
CYP24A1	CYP24A1	1.20864	6.79726	2.56526e-06
FRAT1	FRAT1	1.20682	2.07163	0.0365233
ETV1	ETV1	1.20649	14.421	1.62446e-13
IL7	IL7	1.20445	6.20881	8.84747e-06
KDM4D	KDM4D	1.2036	2.67024	0.0116642
NOS1AP	NOS1AP	1.20122	4.85627	0.000146716
PCSK1	PCSK1	1.20103	15.4791	1.54188e-14
SEC1P	SEC1P	1.20068	1.31807	0.142755
TTYH3	TTYH3	1.2004	10.6326	6.53472e-10
PRKG1	PRKG1	1.19959	4.22361	0.000529191
TNFSF9	TNFSF9	1.19957	17.7668	9.82317e-17
P2RX6	P2RX6	1.19774	2.01407	0.0407547
SLC1A1	SLC1A1	1.19657	21.6442	1.68353e-20
RUVBL1-AS1	RUVBL1-AS1	1.19516	1.65807	0.0779029
GPR3	GPR3	1.19274	1.61947	0.0832928
SNORA67	SNORA67	1.19239	4.84397	0.000150316
KLRG1	KLRG1	1.1918	1.5463	0.0951722
CYP27B1	CYP27B1	1.19123	4.78694	0.000169242
SERPINF2	SERPINF2	1.19071	1.34872	0.134783
EGR2	EGR2	1.18961	1.85896	0.0539654
IFI16	IFI16	1.1863	16.5448	1.42851e-15
SOCS1	SOCS1	1.1853	2.13703	0.0323129
PLAT	PLAT	1.18264	6.2949	7.39141e-06
IRAK3	IRAK3	1.18143	14.1229	3.11591e-13
HLA-C	HLA-C	1.18071	14.7072	8.60888e-14
IKBKE	IKBKE	1.17851	14.5681	1.17438e-13
SYT17	SYT17	1.17753	6.62274	3.72759e-06
BDH2	BDH2	1.177	8.42627	7.80195e-08
NFE2	NFE2	1.17379	2.15859	0.0310294
COL8A2	COL8A2	1.17097	2.10082	0.034612
MAP3K5	MAP3K5	1.17091	18.112	4.65888e-17
TLR1	TLR1	1.16993	2.16162	0.0308677
ACOT1	ACOT1	1.16929	3.07354	0.00530837
KCNJ18	KCNJ18	1.16817	7.3529	7.7974e-07
PPP1R3G	PPP1R3G	1.16754	2.83773	0.00839677
LINC01021	LINC01021	1.16606	14.4296	1.59648e-13
FRMD3	FRMD3	1.16503	8.54337	6.09169e-08
SNAP25	SNAP25	1.1636	9.90586	3.21292e-09
RAB3D	RAB3D	1.16097	18.0303	5.53082e-17
HOXA-AS2	HOXA-AS2	1.15897	1.80269	0.0599514
C1R	C1R	1.1582	16.4451	1.78745e-15
KIAA1551	KIAA1551	1.15776	12.0954	2.66067e-11
BMP4	BMP4	1.15676	12.3748	1.46271e-11
FCHO1	FCHO1	1.15666	4.14062	0.000625557
PTPRG	PTPRG	1.15574	6.58929	3.99486e-06
CMTM7	CMTM7	1.15515	8.53301	6.22418e-08
NPAS3	NPAS3	1.15364	1.35099	0.134131
PPM1J	PPM1J	1.15092	1.38354	0.127004
SOBP	SOBP	1.1505	8.07328	1.66272e-07
ABCC2	ABCC2	1.14736	3.65869	0.00164235
IGFBP3	IGFBP3	1.14696	16.2182	2.96482e-15
TPP1	TPP1	1.14687	17.9282	6.88329e-17
SCARNA2	SCARNA2	1.14637	2.13629	0.0323598
ADAM11	ADAM11	1.14516	2.32244	0.022678
OCIAD2	OCIAD2	1.14442	11.5439	8.94717e-11
TMX4	TMX4	1.14318	17.2049	3.29843e-16
TDRD6	TDRD6	1.14179	1.99046	0.0425347
KDM5B	KDM5B	1.13865	28.1191	8.64552e-27
FZD4	FZD4	1.13781	13.2588	2.06545e-12
LINGO2	LINGO2	1.13716	6.45783	5.27982e-06
SOX7	SOX7	1.13583	9.56615	6.64326e-09
RAC2	RAC2	1.13579	9.1127	1.79008e-08
RBM47	RBM47	1.13544	12.3202	1.64599e-11
CTSD	CTSD	1.13238	17.7956	9.22164e-17
TCTEX1D4	TCTEX1D4	1.13198	2.61334	0.0130247
ESPNL	ESPNL	1.13018	3.0784	0.00525564
PRDM13	PRDM13	1.13009	4.65391	0.000222733
HDAC9	HDAC9	1.12784	6.44448	5.44004e-06
HSD11B2	HSD11B2	1.12689	2.14569	0.0318041
OR2B2	OR2B2	1.12665	4.63296	0.000231471
FRAT2	FRAT2	1.12609	10.6019	6.98018e-10
FOXQ1	FOXQ1	1.12552	8.0162	1.87378e-07
TLR2	TLR2	1.12242	1.89656	0.0504166
TMEM92	TMEM92	1.1198	2.70214	0.0109911
CDC42BPG	CDC42BPG	1.1196	2.30703	0.0233305
PLSCR1	PLSCR1	1.11859	9.85966	3.53808e-09
ZNF154	ZNF154	1.11807	7.32802	8.225e-07
PRRG2	PRRG2	1.1173	1.89335	0.0506901
NALCN	NALCN	1.11409	10.068	2.2674e-09
SCARF2	SCARF2	1.11379	3.1037	0.00500834
SLC9A7	SLC9A7	1.11164	16.6666	1.0913e-15
CCBE1	CCBE1	1.10996	2.32758	0.0224644
MIR4709	MIR4709	1.10952	8.81517	3.40259e-08
MANBA	MANBA	1.107	14.7906	7.17514e-14
ZNF697	ZNF697	1.10578	10.5717	7.47041e-10
ARHGEF16	ARHGEF16	1.10467	8.54778	6.05887e-08
ARHGAP20	ARHGAP20	1.10188	3.80202	0.001238
ZNF91	ZNF91	1.10161	11.1671	2.05907e-10
SLC11A2	SLC11A2	1.10125	24.7315	1.68121e-23
AVIL	AVIL	1.09899	4.89233	0.000135978
LONRF1	LONRF1	1.09896	4.31701	0.000440633
TNIK	TNIK	1.09842	15.3	2.3169e-14
MMP21	MMP21	1.09834	1.47685	0.107832
THRB	THRB	1.09832	13.2951	1.91575e-12
SNORA12	SNORA12	1.09515	4.75806	0.000178925
TRIM8	TRIM8	1.09381	12.0992	2.6425e-11
SNORA7B	SNORA7B	1.09268	3.24859	0.00374379
NYAP1	NYAP1	1.09176	2.55643	0.0145044
PKIA	PKIA	1.08914	8.81682	3.39387e-08
RAB20	RAB20	1.08896	3.09415	0.00509329
TLR4	TLR4	1.08871	17.2974	2.70561e-16
SERPINB8	SERPINB8	1.08672	14.3977	1.71006e-13
GATA6-AS1	GATA6-AS1	1.08258	1.72705	0.0686758
OAF	OAF	1.08075	8.61078	5.32922e-08
DUSP23	DUSP23	1.08059	5.65452	2.77787e-05
FAM149A	FAM149A	1.0775	1.48583	0.106138
AKR1B1	AKR1B1	1.07685	17.2722	2.84991e-16
CREM	CREM	1.07532	10.7664	4.90086e-10
SLFN5	SLFN5	1.07353	18.0995	4.77968e-17
LOC90246	LOC90246	1.07335	1.42033	0.118895
NFKBIZ	NFKBIZ	1.07264	19.2393	3.75173e-18
TMEM150A	TMEM150A	1.06815	6.12453	1.04924e-05
CARD6	CARD6	1.06768	19.3854	2.7189e-18
LIFR-AS1	LIFR-AS1	1.06586	2.80029	0.00905125
KAZALD1	KAZALD1	1.06553	9.30454	1.17047e-08
LENEP	LENEP	1.06393	1.41729	0.119587
FLJ43879	FLJ43879	1.06282	1.40242	0.12294
SH2B3	SH2B3	1.06203	9.69356	5.04307e-09
GATS	GATS	1.06116	6.74127	2.8899e-06
GP6	GP6	1.05909	1.38452	0.126827
GRB14	GRB14	1.05899	4.65457	0.000222591
CASP10	CASP10	1.05736	7.57777	4.82473e-07
REP15	REP15	1.05729	1.74842	0.0660496
TNFRSF10D	TNFRSF10D	1.05662	14.5705	1.17093e-13
PDP1	PDP1	1.05546	15.7286	8.79367e-15
IL1B	IL1B	1.05545	3.73206	0.00141828
ARMCX1	ARMCX1	1.05108	4.94788	0.000121294
KYNU	KYNU	1.05099	14.7659	7.54397e-14
INSR	INSR	1.05019	8.09316	1.5918e-07
LOC100507156	LOC100507156	1.04984	7.13447	1.24685e-06
PLK3	PLK3	1.04881	7.06546	1.44254e-06
IGFBP4	IGFBP4	1.04806	14.0719	3.49621e-13
PTGER2	PTGER2	1.04791	3.35944	0.00298733
ZBED6CL	ZBED6CL	1.04711	12.2031	2.11512e-11
RNU4ATAC	RNU4ATAC	1.0464	2.09932	0.0346895
LRIG1	LRIG1	1.04348	10.5474	7.86518e-10
CYP1A1	CYP1A1	1.04343	2.61818	0.0129033
TNFRSF14	TNFRSF14	1.0427	4.59355	0.000250362
PLAUR	PLAUR	1.04088	15.8573	6.573e-15
PTGES	PTGES	1.04078	16.3931	1.99807e-15
FAM110B	FAM110B	1.04034	4.64064	0.000228244
FAS	FAS	1.03913	10.9266	3.48821e-10
PCOLCE2	PCOLCE2	1.03853	11.2765	1.61941e-10
FGFR3	FGFR3	1.03734	2.94455	0.00682854
ERMP1	ERMP1	1.03719	18.9102	7.75212e-18
FSD1	FSD1	1.03612	6.13823	1.01981e-05
RERG	RERG	1.03252	6.4206	5.70447e-06
SNORA37	SNORA37	1.03154	1.38112	0.127539
RNVU1-8	RNVU1-8	1.03079	1.89805	0.050299
C1QTNF1-AS1	C1QTNF1-AS1	1.03052	1.86542	0.0532835
BMP2	BMP2	1.02733	15.238	2.65244e-14
RHOU	RHOU	1.02702	2.0814	0.0358732
LINC00324	LINC00324	1.02534	2.62055	0.0128408
C10orf11	C10orf11	1.02491	3.67184	0.00160336
IPO5P1	IPO5P1	1.02473	3.52874	0.00212186
SYNGR3	SYNGR3	1.02435	3.77475	0.00130445
FAM195B	FAM195B	1.02345	6.04891	1.22209e-05
IL1RL2	IL1RL2	1.02327	3.57033	0.00195216
CXCL16	CXCL16	1.02221	4.45936	0.000330736
SNORA2A	SNORA2A	1.02073	1.58937	0.0880504
SCN3B	SCN3B	1.02034	1.44987	0.11296
SNORD16	SNORD16	1.01991	6.0096	1.323e-05
DKK 3.00	DKK 3.00	1.01779	8.74875	3.95509e-08
PTPRD	PTPRD	1.01736	8.47447	7.05438e-08
FOXD1	FOXD1	1.01713	2.85645	0.00810477
LYRM1	LYRM1	1.01326	7.65419	4.12555e-07
TBC1D8	TBC1D8	1.01325	15.5921	1.19488e-14
ITGA1	ITGA1	1.01127	17.5046	1.74656e-16
CASC10	CASC10	1.00785	7.9631	2.09265e-07
LONRF2	LONRF2	1.00271	7.96447	2.08827e-07
MKNK2	MKNK2	1.00028	17.6748	1.19507e-16
KLF2	KLF2	1.00022	5.14755	7.98779e-05
LOC339059	LOC339059	-1.00025	2.66074	0.0118859
SMAD3	SMAD3	-1.00141	14.362	1.84755e-13
FAM213B	FAM213B	-1.004	7.11666	1.29536e-06
EPHX1	EPHX1	-1.00698	17.5484	1.58871e-16
HOXC-AS2	HOXC-AS2	-1.00828	3.0386	0.00566937
PMEPA1	PMEPA1	-1.00844	12.7997	5.62951e-12
FAM102B	FAM102B	-1.00875	13.4389	1.39354e-12
CASC5	CASC5	-1.0113	13.6293	9.14275e-13
FAM169A	FAM169A	-1.01155	5.19506	7.25035e-05
LDB3	LDB3	-1.01639	2.22041	0.0275619
FBXL13	FBXL13	-1.01671	3.87511	0.00107023
LHX2	LHX2	-1.01674	5.14995	7.9488e-05
RAET1E-AS1	RAET1E-AS1	-1.01762	5.94763	1.50782e-05
FAM72C	FAM72C	-1.01799	3.49291	0.00227899
H2AFY	H2AFY	-1.01997	22.2565	4.23206e-21
MVK	MVK	-1.02034	4.61771	0.000239032
KIAA1644	KIAA1644	-1.02102	13.8489	5.75047e-13
TCTN3	TCTN3	-1.02214	13.2605	2.06173e-12
EDAR	EDAR	-1.02238	1.89762	0.0503271
TEK	TEK	-1.02738	12.1379	2.43043e-11
REEP1	REEP1	-1.02739	3.10872	0.0049618
ZNF367	ZNF367	-1.02759	12.2166	2.05412e-11
LOC100288637	LOC100288637	-1.02818	13.0815	3.02521e-12
TSPAN3	TSPAN3	-1.02825	14.8832	5.86875e-14
SUSD1	SUSD1	-1.02931	12.35	1.54284e-11
WIPF1	WIPF1	-1.03022	13.2762	1.99262e-12
MSRB3	MSRB3	-1.03059	18.025	5.5814e-17
UBIAD1	UBIAD1	-1.0314	12.3783	1.4538e-11
CYP3A5	CYP3A5	-1.03244	2.51715	0.0156191
ABHD4	ABHD4	-1.03257	12.0569	2.90226e-11
LOC100268168	LOC100268168	-1.03375	4.38935	0.000380552
C5	C5	-1.03626	2.66653	0.0117464
MIR4680	MIR4680	-1.03675	2.65019	0.0121232
SAMD11	SAMD11	-1.03722	11.7814	5.27889e-11
ATP6V0E2	ATP6V0E2	-1.03906	8.44972	7.41771e-08
KRBA1	KRBA1	-1.04104	5.63712	2.87746e-05
MIR4260	MIR4260	-1.04292	2.15169	0.0314482
MRGPRF	MRGPRF	-1.04294	2.5173	0.0156185
SOGA1	SOGA1	-1.04356	10.4461	9.84078e-10
CNNM4	CNNM4	-1.04384	7.97857	2.02587e-07
PHF7	PHF7	-1.04691	2.44698	0.0179291
CAV2	CAV2	-1.04799	15.4604	1.60569e-14
RTKN2	RTKN2	-1.04833	9.70349	4.94957e-09
SLC22A3	SLC22A3	-1.04843	13.0999	2.91164e-12
KCNH1	KCNH1	-1.05163	7.50541	5.64791e-07
ENO3	ENO3	-1.05168	9.78383	4.16566e-09
CLMN	CLMN	-1.05229	2.55158	0.0146333
ROBO2	ROBO2	-1.05579	1.44146	0.114522
PEX5L	PEX5L	-1.05966	4.05113	0.000748909
CD9	CD9	-1.06076	11.9559	3.61517e-11
VENTXP1	VENTXP1	-1.06152	2.42513	0.0187136
KIAA1161	KIAA1161	-1.06169	17.0225	4.9624e-16
ERBB2IP	ERBB2IP	-1.06359	15.9063	5.93468e-15
LOC101928163	LOC101928163	-1.064	2.26841	0.0251376
MMEL1	MMEL1	-1.06678	2.25227	0.0259215
MAP2K6	MAP2K6	-1.0678	5.07039	9.4295e-05
LLGL2	LLGL2	-1.06849	3.06907	0.00535288
MPC1	MPC1	-1.06904	7.11188	1.30847e-06
TREH	TREH	-1.07009	1.70102	0.071925
FAM72A	FAM72A	-1.07125	2.44088	0.0181627
STOX2	STOX2	-1.07181	9.75618	4.42093e-09
CDC42EP3	CDC42EP3	-1.07273	15.7252	8.83995e-15
TCP11L1	TCP11L1	-1.07287	13.7552	7.05562e-13
TSPAN15	TSPAN15	-1.07327	2.55883	0.0144452
PIK3C2B	PIK3C2B	-1.07426	15.2698	2.4774e-14
KLHL30	KLHL30	-1.07859	2.07531	0.0363012
CERCAM	CERCAM	-1.07963	10.9312	3.46228e-10
LBH	LBH	-1.07984	10.899	3.68758e-10
NUF2	NUF2	-1.07989	8.679	4.59327e-08
LDLRAD2	LDLRAD2	-1.08413	9.47778	8.04401e-09
C3orf80	C3orf80	-1.08477	2.17383	0.0301466
RASGRP1	RASGRP1	-1.08856	8.97227	2.42662e-08
PHLDB1	PHLDB1	-1.08937	8.68497	4.53608e-08
UCN2	UCN2	-1.09089	7.32584	8.25842e-07
DPY19L2P2	DPY19L2P2	-1.09176	7.98807	1.98632e-07
PDGFRB	PDGFRB	-1.09294	7.10826	1.31695e-06
NES	NES	-1.09427	5.48372	3.98342e-05
NMU	NMU	-1.095	7.24362	9.85533e-07
GLIPR2	GLIPR2	-1.09569	12.4841	1.14831e-11
SLC25A40	SLC25A40	-1.09714	11.6398	7.22406e-11
LINC01176	LINC01176	-1.09749	2.97651	0.0064124
HDAC11	HDAC11	-1.09803	1.40596	0.122175
FAM98B	FAM98B	-1.09815	16.215	2.97853e-15
SPDYE3	SPDYE3	-1.09829	3.67509	0.0015934
LMO3	LMO3	-1.09856	3.0367	0.00569189
ANLN	ANLN	-1.09875	19.4016	2.6293e-18
HMX2	HMX2	-1.09965	1.93319	0.0471305
KATNBL1	KATNBL1	-1.10236	10.9993	2.97998e-10
FIGF	FIGF	-1.10396	1.30273	0.146406
TUB	TUB	-1.10447	19.434	2.44944e-18
UCP3	UCP3	-1.10477	2.23049	0.0270609
PLXDC2	PLXDC2	-1.10495	19.0228	6.0662e-18
NEXN	NEXN	-1.10498	10.9306	3.46228e-10
PERM1	PERM1	-1.10783	2.52783	0.015301
BHLHA15	BHLHA15	-1.10862	1.53779	0.0966665
NRG4	NRG4	-1.10958	10.7093	5.5447e-10
SRSF11	SRSF11	-1.112	17.1103	4.08908e-16
HBEGF	HBEGF	-1.11343	4.17201	0.000588428
CPS1-IT1	CPS1-IT1	-1.11603	4.67602	0.000213455
SCARNA3	SCARNA3	-1.11606	1.42988	0.116876
POT1-AS1	POT1-AS1	-1.11683	5.84254	1.86801e-05
REC114	REC114	-1.11806	1.78836	0.0615995
CORO1C	CORO1C	-1.12107	25.5996	2.41107e-24
MIR4714	MIR4714	-1.12161	1.50525	0.102546
FBXO27	FBXO27	-1.12349	1.63858	0.0805269
LTBP1	LTBP1	-1.12552	16.9929	5.28183e-16
PPP2R2B	PPP2R2B	-1.12609	6.41926	5.71733e-06
FBXO24	FBXO24	-1.12676	1.65196	0.0787419
LINC00294	LINC00294	-1.12739	10.9712	3.17426e-10
SLC4A4	SLC4A4	-1.13284	4.60289	0.000245976
PDE1A	PDE1A	-1.1352	1.59073	0.0878749
C1QL1	C1QL1	-1.1376	4.63456	0.000230822
HSPG2	HSPG2	-1.13806	9.32953	1.10793e-08
HIST1H4I	HIST1H4I	-1.13828	7.66637	4.01556e-07
PRR5L	PRR5L	-1.13837	17.3009	2.69187e-16
CDRT1	CDRT1	-1.14283	4.59881	0.00024789
S100A10	S100A10	-1.14359	11.9732	3.48034e-11
ADAM32	ADAM32	-1.14392	5.13416	8.20228e-05
SLC16A13	SLC16A13	-1.14416	2.11609	0.0336014
NPY1R	NPY1R	-1.14568	1.36685	0.13049
PLCE1	PLCE1	-1.14794	16.6206	1.20297e-15
ANG	ANG	-1.15015	1.53698	0.096806
AKR1C1	AKR1C1	-1.15104	4.76058	0.000178294
HIST1H4D	HIST1H4D	-1.15289	9.37915	1.00012e-08
PTGES3L	PTGES3L	-1.15445	6.32095	7.02348e-06
LOC101927257	LOC101927257	-1.15554	10.1859	1.75446e-09
LOC440600	LOC440600	-1.15566	1.47883	0.107457
DNAJC6	DNAJC6	-1.16009	6.36868	6.36521e-06
MIR614	MIR614	-1.16052	6.655	3.48491e-06
SERPINI1	SERPINI1	-1.16239	4.71814	0.00019493
PEAR1	PEAR1	-1.16279	6.19449	9.10056e-06
ICK	ICK	-1.16334	6.97898	1.72981e-06
HSD3B7	HSD3B7	-1.16512	5.72723	2.37943e-05
RIC3	RIC3	-1.16675	4.52198	0.000289853
SYNM	SYNM	-1.16757	20.2736	3.6097e-19
TPM1	TPM1	-1.16824	30.7068	2.54814e-29
NCF2	NCF2	-1.17032	7.03794	1.52697e-06
CCDC74A	CCDC74A	-1.17064	1.71311	0.0703875
MYADM	MYADM	-1.1749	13.0852	3.006e-12
SLIT3	SLIT3	-1.17543	1.3754	0.128846
MIR6819	MIR6819	-1.17688	1.71275	0.0704308
MAMDC2	MAMDC2	-1.18012	11.048	2.68163e-10
FOXP1	FOXP1	-1.18052	16.6294	1.18238e-15
ZYX	ZYX	-1.183	14.5067	1.34302e-13
HYKK	HYKK	-1.18565	1.93863	0.0466664
CDKN2B	CDKN2B	-1.18607	23.7512	1.50111e-22
TNFAIP8	TNFAIP8	-1.18885	15.8906	6.11945e-15
CCDC136	CCDC136	-1.18961	2.53597	0.0150772
AP1M2	AP1M2	-1.19184	9.70577	4.93056e-09
TMEM170B	TMEM170B	-1.19302	4.66085	0.000220305
PCOLCE-AS1	PCOLCE-AS1	-1.19313	4.14613	0.000620354
EAF2	EAF2	-1.19452	1.63369	0.0812694
MAMDC2-AS1	MAMDC2-AS1	-1.19456	1.56509	0.0918933
CYTH3	CYTH3	-1.19634	24.6761	1.90038e-23
RPS6KA2-IT1	RPS6KA2-IT1	-1.19892	6.0824	1.14547e-05
KIAA1147	KIAA1147	-1.20051	17.4622	1.908e-16
HIST1H3C	HIST1H3C	-1.20129	7.31593	8.4326e-07
GCLM	GCLM	-1.20137	22.6347	1.80225e-21
FSTL1	FSTL1	-1.20401	31.0826	1.1209e-29
AQP3	AQP3	-1.2042	23.03	7.47834e-22
SERPINE1	SERPINE1	-1.20733	10.1696	1.81279e-09
LOC100126784	LOC100126784	-1.20821	10.6766	5.96031e-10
EEF1A2	EEF1A2	-1.20991	17.3502	2.43915e-16
NXNL2	NXNL2	-1.21071	4.34942	0.00041272
CBX7	CBX7	-1.21486	2.79538	0.0091367
KCNG1	KCNG1	-1.21531	2.6214	0.0128194
PALD1	PALD1	-1.22361	3.1985	0.00413153
SLC22A13	SLC22A13	-1.2243	2.661	0.0118832
PRSS54	PRSS54	-1.225	1.52902	0.0982604
MYL9	MYL9	-1.23019	30.4121	4.84808e-29
TPM4	TPM4	-1.23314	27.8121	1.7155e-26
SLC2A1-AS1	SLC2A1-AS1	-1.23449	2.17283	0.0301935
KIF20A	KIF20A	-1.23552	23.3844	3.41283e-22
NUTM2D	NUTM2D	-1.23629	1.46905	0.109355
PARD6A	PARD6A	-1.23784	2.18438	0.0295333
SHISA4	SHISA4	-1.23826	3.14732	0.00457542
TAGLN	TAGLN	-1.2383	24.3911	3.57373e-23
DAGLA	DAGLA	-1.24402	9.89009	3.31745e-09
MSH5-SAPCD1	MSH5-SAPCD1	-1.24412	1.53038	0.0979982
FAXC	FAXC	-1.24448	3.50502	0.00222595
CMYA5	CMYA5	-1.2464	5.12249	8.40999e-05
TMEM74	TMEM74	-1.24802	1.94221	0.0464088
CLU	CLU	-1.25106	31.1299	1.01274e-29
DCTD	DCTD	-1.25338	14.8135	6.82294e-14
C10orf55	C10orf55	-1.25902	1.37308	0.12924
NPY6R	NPY6R	-1.25991	1.48599	0.10612
MUC16	MUC16	-1.26124	16.65	1.13059e-15
MTPN	MTPN	-1.26206	22.7019	1.55064e-21
LUZP6	LUZP6	-1.26206	22.7019	1.55064e-21
RPS10P7	RPS10P7	-1.26265	2.50162	0.0161146
PLCD1	PLCD1	-1.26491	2.58983	0.013616
C11orf63	C11orf63	-1.26823	2.74221	0.0101721
MPP1	MPP1	-1.27173	3.7572	0.00135053
LOC100499194	LOC100499194	-1.27213	2.68229	0.0114028
RAP1GAP	RAP1GAP	-1.27247	6.08906	1.13066e-05
MEIS3P1	MEIS3P1	-1.2729	8.77986	3.68623e-08
EDN1	EDN1	-1.27308	5.15579	7.85245e-05
GAS2L3	GAS2L3	-1.27333	9.34311	1.0795e-08
GPC5-AS1	GPC5-AS1	-1.27382	2.48681	0.0165934
CCL2	CCL2	-1.27518	9.79938	4.03052e-09
CSRP1	CSRP1	-1.27522	32.9382	1.67644e-31
SMTN	SMTN	-1.27551	10.1952	1.72184e-09
TRPM3	TRPM3	-1.2767	4.12358	0.000645336
ZNF709	ZNF709	-1.27834	2.23963	0.0265778
RNF224	RNF224	-1.27843	3.66566	0.00162227
TM4SF20	TM4SF20	-1.27884	1.59622	0.0869375
CCDC92	CCDC92	-1.28053	8.33666	9.46977e-08
STEAP4	STEAP4	-1.28593	6.23137	8.43301e-06
CRIP1	CRIP1	-1.28745	17.9484	6.61373e-17
C2orf15	C2orf15	-1.28863	1.359	0.132202
SMARCD3	SMARCD3	-1.28896	9.51037	7.49276e-09
VDAC1	VDAC1	-1.28955	24.4355	3.24253e-23
SEMA3B	SEMA3B	-1.29178	10.824	4.31216e-10
MIR198	MIR198	-1.29478	11.3215	1.46512e-10
CCDC144CP	CCDC144CP	-1.29539	8.4295	7.75324e-08
HAGLR	HAGLR	-1.29713	1.54913	0.0947583
PPP1R3C	PPP1R3C	-1.29763	13.1624	2.54722e-12
STXBP5L	STXBP5L	-1.29807	8.14537	1.41615e-07
PECR	PECR	-1.29899	5.76628	2.19025e-05
NPAS4	NPAS4	-1.29904	3.55571	0.0020117
HYAL1	HYAL1	-1.30012	2.33943	0.0219763
CYR61	CYR61	-1.30026	18.9971	6.39043e-18
LINC00473	LINC00473	-1.30101	21.892	9.59351e-21
RGS3	RGS3	-1.30312	13.2153	2.26894e-12
ADCK2	ADCK2	-1.30401	6.20614	8.8879e-06
LINC00602	LINC00602	-1.30498	13.7195	7.57592e-13
LINC00319	LINC00319	-1.30844	6.26634	7.85576e-06
NR4A1	NR4A1	-1.31278	17.7332	1.05788e-16
PQLC3	PQLC3	-1.31369	5.13659	8.16412e-05
PDGFB	PDGFB	-1.31924	4.56325	0.000266571
FAM222A	FAM222A	-1.32211	2.61475	0.0129935
PLCE1-AS2	PLCE1-AS2	-1.3223	1.79937	0.0602842
MYOM3	MYOM3	-1.32663	2.29417	0.0239188
WNT9A	WNT9A	-1.32803	2.43371	0.0184036
INSIG1	INSIG1	-1.32856	23.9323	1.0081e-22
CSDC2	CSDC2	-1.32873	9.97941	2.7519e-09
CEP112	CEP112	-1.33204	7.06375	1.44687e-06
CREB3L2	CREB3L2	-1.33307	35.6428	3.9086e-34
SPTBN5	SPTBN5	-1.33354	5.65186	2.793e-05
PIGS	PIGS	-1.33405	25.8462	1.41165e-24
ROS1	ROS1	-1.33619	1.46867	0.10943
LINC01279	LINC01279	-1.33768	2.99156	0.00623183
AUTS2	AUTS2	-1.33973	10.3535	1.21034e-09
THOC7-AS1	THOC7-AS1	-1.34331	2.90451	0.00738092
ROCK2	ROCK2	-1.34387	25.7513	1.72793e-24
PALLD	PALLD	-1.3446	33.4266	5.53399e-32
GRID1	GRID1	-1.34744	1.33567	0.138269
EML1	EML1	-1.34846	3.79051	0.0012671
CREB5	CREB5	-1.34898	6.3604	6.47704e-06
KIAA0040	KIAA0040	-1.35142	17.3447	2.46221e-16
FENDRR	FENDRR	-1.35782	6.42621	5.63598e-06
LINC00313	LINC00313	-1.3581	5.63755	2.87659e-05
MIR6843	MIR6843	-1.35899	1.72137	0.0693272
STMN1	STMN1	-1.36206	20.4836	2.28598e-19
TXNRD1	TXNRD1	-1.36571	36.0666	1.48733e-34
KIAA1024	KIAA1024	-1.36604	6.16389	9.67322e-06
FZD3	FZD3	-1.367	1.42547	0.117783
TNS1	TNS1	-1.36708	5.72953	2.36858e-05
LRRC17	LRRC17	-1.36945	1.32027	0.142198
CALD1	CALD1	-1.37169	37.3569	8.34343e-36
MAPK8IP2	MAPK8IP2	-1.37577	2.69106	0.0112233
PP14571	PP14571	-1.37598	2.96934	0.00650386
CLIC3	CLIC3	-1.37725	7.64714	4.18441e-07
LOC102724927	LOC102724927	-1.37793	5.38619	4.87805e-05
PCDHAC2	PCDHAC2	-1.37953	18.0632	5.14448e-17
LOC101927056	LOC101927056	-1.37966	2.93827	0.0069095
MIR454	MIR454	-1.38069	1.54328	0.0957467
MIR3917	MIR3917	-1.38381	8.60829	5.35341e-08
MYOT	MYOT	-1.38421	4.478	0.000319033
ACOX3	ACOX3	-1.38738	14.2145	2.55868e-13
CTGF	CTGF	-1.38954	23.1929	5.1858e-22
EPB41L1	EPB41L1	-1.39211	28.6494	2.60798e-27
MKRN9P	MKRN9P	-1.3932	1.30855	0.144989
SH3BP5-AS1	SH3BP5-AS1	-1.39496	27.8649	1.52856e-26
TMEM136	TMEM136	-1.40177	5.78863	2.0908e-05
FBXW10	FBXW10	-1.40243	1.66632	0.076753
THBS1	THBS1	-1.40262	26.3569	4.50416e-25
PLCE1-AS1	PLCE1-AS1	-1.40883	2.82692	0.0085945
NPTX1	NPTX1	-1.41002	12.964	3.92559e-12
ADAMTS8	ADAMTS8	-1.41622	4.84529	0.000149947
DGCR6	DGCR6	-1.41668	2.38457	0.020216
PHYHIP	PHYHIP	-1.42203	2.94189	0.00686589
SPOCD1	SPOCD1	-1.42922	16.2058	3.0336e-15
AKR1C2	AKR1C2	-1.43023	30.0266	1.14584e-28
NAV2-AS2	NAV2-AS2	-1.4327	11.9016	4.04578e-11
ADAM12	ADAM12	-1.43474	30.951	1.49504e-29
KAZN	KAZN	-1.43699	16.7492	9.15067e-16
IGFN1	IGFN1	-1.43925	13.9681	4.4001e-13
NAV2	NAV2	-1.4447	23.9234	1.02427e-22
RUNDC3B	RUNDC3B	-1.45587	5.40811	4.66563e-05
PLEKHA2	PLEKHA2	-1.46092	41.8359	3.46131e-40
FAM19A2	FAM19A2	-1.46293	4.41906	0.000358913
HERC3	HERC3	-1.46294	19.1608	4.44641e-18
ST8SIA3	ST8SIA3	-1.46429	3.15249	0.0045261
PCDHA8	PCDHA8	-1.46741	13.338	1.74294e-12
NGF	NGF	-1.46813	2.4748	0.0169629
HMOX1	HMOX1	-1.46993	15.1191	3.46949e-14
TGFBI	TGFBI	-1.474	39.9216	2.51136e-38
SIK1	SIK1	-1.47448	32.6278	3.39866e-31
PCDHA6	PCDHA6	-1.47501	13.4531	1.35154e-12
PCDHA2	PCDHA2	-1.47501	13.4531	1.35154e-12
VIPR2	VIPR2	-1.48233	3.71407	0.00147262
PCDHA3	PCDHA3	-1.48259	13.5332	1.13105e-12
LOC100506895	LOC100506895	-1.48282	1.82795	0.057253
PCDHA11	PCDHA11	-1.48466	13.6262	9.18872e-13
PCDHA4	PCDHA4	-1.4847	13.6034	9.66385e-13
S100A3	S100A3	-1.48775	13.4251	1.43526e-12
C21orf91-OT1	C21orf91-OT1	-1.48894	1.57719	0.0899709
PCDHA5	PCDHA5	-1.49028	13.6463	8.83052e-13
PCDHA1	PCDHA1	-1.49141	13.7424	7.23418e-13
PCDHA10	PCDHA10	-1.49228	13.7099	7.72795e-13
PCDHA7	PCDHA7	-1.49232	13.687	8.12885e-13
PCDHA13	PCDHA13	-1.49276	13.8113	6.24187e-13
PCDHAC1	PCDHAC1	-1.49674	13.9376	4.70995e-13
SLC22A5	SLC22A5	-1.49754	31.9861	1.45428e-30
CLDN3	CLDN3	-1.49757	1.88967	0.0509974
PCDHA12	PCDHA12	-1.49838	14.1654	2.85184e-13
PCDHA9	PCDHA9	-1.49872	13.7888	6.55999e-13
KRT80	KRT80	-1.5024	23.9538	9.64207e-23
NACAD	NACAD	-1.50298	2.41331	0.0191399
COL4A3	COL4A3	-1.50495	32.9968	1.47677e-31
FSTL3	FSTL3	-1.50918	17.2761	2.83284e-16
GJB3	GJB3	-1.51237	5.69452	2.55479e-05
MIR6892	MIR6892	-1.51249	2.99063	0.00623885
CRLF1	CRLF1	-1.51422	19.8524	9.45169e-19
HIVEP3	HIVEP3	-1.51751	20.3766	2.88001e-19
GPR17	GPR17	-1.51806	8.4021	8.2106e-08
HPD	HPD	-1.52083	4.10662	0.000668088
AHNAK2	AHNAK2	-1.5325	25.7481	1.73136e-24
GALNT12	GALNT12	-1.53298	1.80133	0.0600638
CREG2	CREG2	-1.53487	7.88123	2.50541e-07
MPPED2	MPPED2	-1.53651	4.52285	0.000289427
LIMS2	LIMS2	-1.53712	16.42	1.88848e-15
FAM124A	FAM124A	-1.53905	5.91161	1.62979e-05
CES4A	CES4A	-1.54099	4.25587	0.000496421
ETS2	ETS2	-1.54204	41.7672	4.00196e-40
LOC101928418	LOC101928418	-1.54541	3.84573	0.00113254
SH3BP5	SH3BP5	-1.54615	36.5849	4.73693e-35
FLNB	FLNB	-1.55178	33.9954	1.571e-32
POTEJ	POTEJ	-1.5539	1.51328	0.101186
SEPT5-GP1BB	SEPT5-GP1BB	-1.55508	1.68582	0.074234
LINC00482	LINC00482	-1.55857	1.73737	0.0673513
ATP2A3	ATP2A3	-1.56435	9.41396	9.2802e-09
LOC202181	LOC202181	-1.56979	2.61464	0.0129935
MAP7	MAP7	-1.57056	31.9004	1.75777e-30
CRISPLD2	CRISPLD2	-1.57139	6.63609	3.62099e-06
SFXN1	SFXN1	-1.57676	43.5448	7.79185e-42
USP2	USP2	-1.577	5.50576	3.79399e-05
SNORD121A	SNORD121A	-1.58089	1.41898	0.119204
LOC100506136	LOC100506136	-1.59027	3.4941	0.00227452
FAM71F2	FAM71F2	-1.59224	7.19082	1.10343e-06
EPHA5-AS1	EPHA5-AS1	-1.59258	12.0216	3.13632e-11
MIR2355	MIR2355	-1.59378	2.18712	0.0293917
MIR554	MIR554	-1.59613	1.92489	0.0478427
ABCC8	ABCC8	-1.59902	1.72302	0.0691096
ACKR3	ACKR3	-1.60428	42.9025	3.31918e-41
MIR6716	MIR6716	-1.61622	3.64204	0.00169741
CNR1	CNR1	-1.6197	4.90593	0.00013249
PKDCC	PKDCC	-1.62037	18.4624	2.10056e-17
LMO1	LMO1	-1.62642	14.8219	6.7082e-14
C1QTNF7	C1QTNF7	-1.62733	1.67038	0.0762047
LRRC69	LRRC69	-1.6418	4.09015	0.000691399
HOXB13	HOXB13	-1.64683	3.00709	0.00604576
LINC00707	LINC00707	-1.64763	14.6934	8.86595e-14
ZNF469	ZNF469	-1.64923	13.7445	7.21507e-13
PRKXP1	PRKXP1	-1.66435	3.59857	0.00185086
CLDN14	CLDN14	-1.66784	3.61862	0.00178334
HNRNPA1P33	HNRNPA1P33	-1.67143	23.7172	1.60829e-22
MAP7D2	MAP7D2	-1.67218	15.7351	8.68542e-15
MYBL1	MYBL1	-1.67636	33.5835	3.88771e-32
C1QTNF3	C1QTNF3	-1.6769	8.35102	9.17215e-08
LINC00842	LINC00842	-1.68123	12.2581	1.88103e-11
PART1	PART1	-1.68692	4.75883	0.000178772
P4HA3	P4HA3	-1.69002	7.4905	5.81607e-07
IGIP	IGIP	-1.69148	7.39816	7.09483e-07
DLX6	DLX6	-1.69821	5.3135	5.68457e-05
LRP11	LRP11	-1.70589	49.6557	7.66057e-48
KREMEN1	KREMEN1	-1.71143	4.08973	0.000691723
AQPEP	AQPEP	-1.71246	2.63872	0.0123891
GLP2R	GLP2R	-1.71426	33.8468	2.17421e-32
HOXA9	HOXA9	-1.7163	1.34679	0.135246
ARHGAP33	ARHGAP33	-1.73337	9.84568	3.6486e-09
EPHA5	EPHA5	-1.73404	34.1728	1.06252e-32
MAP1A	MAP1A	-1.74157	9.33967	1.08664e-08
MYO7B	MYO7B	-1.74687	5.40211	4.72114e-05
CDH6	CDH6	-1.75274	21.4047	2.87492e-20
IGFBP5	IGFBP5	-1.75483	5.76334	2.20201e-05
NPNT	NPNT	-1.75613	29.7843	1.97507e-28
DLX6-AS1	DLX6-AS1	-1.75849	2.53616	0.0150748
FOXF1	FOXF1	-1.76083	12.1182	2.53874e-11
APCDD1L-AS1	APCDD1L-AS1	-1.76331	3.36496	0.00295406
MIR630	MIR630	-1.77426	2.27841	0.0246323
BEGAIN	BEGAIN	-1.77722	17.3435	2.46221e-16
UGT8	UGT8	-1.77929	33.7152	2.89445e-32
SYTL5	SYTL5	-1.78019	3.31308	0.00328001
C6orf165	C6orf165	-1.78105	1.42644	0.117599
MAP1B	MAP1B	-1.78658	36.9842	1.92742e-35
SGIP1	SGIP1	-1.78781	1.63963	0.0803649
SC5D	SC5D	-1.79296	34.5878	4.27315e-33
CYFIP2	CYFIP2	-1.79349	29.3498	5.26656e-28
SLC4A3	SLC4A3	-1.79361	1.80531	0.0596917
SERF1B	SERF1B	-1.7972	2.47723	0.0168833
SERF1A	SERF1A	-1.7972	2.47723	0.0168833
AK7	AK7	-1.79755	1.30784	0.145107
SNPH	SNPH	-1.7987	2.90444	0.00738092
ARSI	ARSI	-1.80635	4.13221	0.000635356
TTC23L	TTC23L	-1.8124	1.99378	0.04226
CYP4F11	CYP4F11	-1.81439	1.38	0.127783
DCLK2	DCLK2	-1.81561	36.3854	7.42271e-35
GLIS1	GLIS1	-1.81693	11.1334	2.2141e-10
AGBL1	AGBL1	-1.82486	4.91089	0.000131295
LINC01191	LINC01191	-1.82649	1.64584	0.0794663
WNT7B	WNT7B	-1.82852	36.2948	9.05506e-35
USH1C	USH1C	-1.82952	2.29286	0.0239712
PRRT2	PRRT2	-1.83229	13.4103	1.48195e-12
SPATC1	SPATC1	-1.83315	1.49675	0.104122
MYEOV	MYEOV	-1.83379	4.89265	0.000135958
EPPK1	EPPK1	-1.83706	6.24216	8.2457e-06
RNF150	RNF150	-1.84187	50.4848	1.21758e-48
ADAMTS15	ADAMTS15	-1.84332	23.3877	3.40292e-22
TUFT1	TUFT1	-1.8455	21.6354	1.71069e-20
CACNB4	CACNB4	-1.84614	27.1977	6.9314e-26
HS3ST5	HS3ST5	-1.84957	1.81483	0.0586204
LOC100130880	LOC100130880	-1.85296	6.22056	8.63863e-06
CAPSL	CAPSL	-1.85817	1.48079	0.107088
ADRA2A	ADRA2A	-1.86498	21.4999	2.31812e-20
LDLRAD4-AS1	LDLRAD4-AS1	-1.86789	6.08539	1.13848e-05
DAB1	DAB1	-1.87042	20.3118	3.31836e-19
SLCO1C1	SLCO1C1	-1.87257	26.059	8.79221e-25
LDLRAD4	LDLRAD4	-1.87611	42.1981	1.52357e-40
TUB-AS1	TUB-AS1	-1.88193	7.5005	5.70072e-07
LINC01133	LINC01133	-1.88515	9.50023	7.64908e-09
MYPN	MYPN	-1.89649	31.3069	6.78915e-30
GPR1	GPR1	-1.90511	13.2801	1.97914e-12
TNFRSF19	TNFRSF19	-1.91665	16.3818	2.03938e-15
MIR6755	MIR6755	-1.93481	1.50511	0.102546
HOXA10-HOXA9	HOXA10-HOXA9	-1.95181	1.63808	0.0806045
ECEL1	ECEL1	-1.95342	7.78603	3.09001e-07
HMX3	HMX3	-1.95667	17.979	6.18349e-17
FBXO32	FBXO32	-1.96036	63.1566	3.92893e-61
ACTA2	ACTA2	-1.97268	50.1538	2.53061e-48
ACTC1	ACTC1	-1.98891	28.1178	8.64552e-27
MIR3936	MIR3936	-1.99068	4.33241	0.000427016
ACADSB	ACADSB	-1.99115	9.65059	5.54464e-09
ZNF528	ZNF528	-1.99305	3.28471	0.00347448
GNGT1	GNGT1	-2.02747	2.08234	0.0358044
CHST8	CHST8	-2.02886	9.86018	3.53808e-09
FBLN5	FBLN5	-2.0377	43.4333	9.92335e-42
L1CAM	L1CAM	-2.05321	63.3901	2.36889e-61
MUC7	MUC7	-2.05549	1.43445	0.116
COPZ2	COPZ2	-2.05826	7.1288	1.26196e-06
LOC101927391	LOC101927391	-2.07069	1.46724	0.109732
ARHGEF37	ARHGEF37	-2.08448	6.99582	1.66858e-06
ACTA2-AS1	ACTA2-AS1	-2.09967	42.7743	4.26967e-41
GALNT13	GALNT13	-2.10118	4.99384	0.000110767
2023-09-05	2023-09-05	-2.11308	2.25022	0.0260242
ELN	ELN	-2.11419	5.29746	5.86411e-05
CDH12	CDH12	-2.11682	5.55501	3.4335e-05
CASZ1	CASZ1	-2.12536	18.8211	9.45231e-18
RNF182	RNF182	-2.12851	50.6178	9.2496e-49
TMEM63C	TMEM63C	-2.12979	7.71022	3.64123e-07
ASIC3	ASIC3	-2.13842	4.52586	0.000287579
CERKL	CERKL	-2.1389	5.69247	2.5651e-05
SCARA3	SCARA3	-2.14008	53.7025	9.17122e-52
TSPAN33	TSPAN33	-2.18363	2.85889	0.00806724
KRT17	KRT17	-2.20029	58.1638	3.6371e-56
STAU2-AS1	STAU2-AS1	-2.20144	2.24694	0.026196
TNNC1	TNNC1	-2.20303	12.1607	2.31933e-11
LOC101927755	LOC101927755	-2.20983	1.62318	0.0827583
CACNG4	CACNG4	-2.20999	22.4682	2.62146e-21
NKX2-1	NKX2-1	-2.22016	3.64441	0.00169069
CLDN4	CLDN4	-2.23113	20.4262	2.58927e-19
LINC00689	LINC00689	-2.23302	6.81542	2.47122e-06
RHBDL3	RHBDL3	-2.25813	6.59774	3.92804e-06
CNN1	CNN1	-2.27393	17.727	1.0699e-16
RTN1	RTN1	-2.28462	4.75868	0.000178772
PRUNE2	PRUNE2	-2.30741	95.7436	3.32154e-93
SYNPO2	SYNPO2	-2.30952	19.126	4.80009e-18
ITIH4	ITIH4	-2.31462	1.62377	0.0826944
MYO1G	MYO1G	-2.33048	3.69588	0.00152852
MYOCD	MYOCD	-2.336	75.405	3.54799e-73
KRT14	KRT14	-2.3391	3.27587	0.00353805
SDC1	SDC1	-2.35065	50.4803	1.21758e-48
NEURL1B	NEURL1B	-2.36177	37.1565	1.30999e-35
SPOCK3	SPOCK3	-2.36425	7.97387	2.04572e-07
NEDD9	NEDD9	-2.36909	36.1297	1.31136e-34
IGF1	IGF1	-2.37114	12.9499	4.04705e-12
LOC100996758	LOC100996758	-2.37159	4.61319	0.000241265
OLFML2A	OLFML2A	-2.37279	52.1328	3.08859e-50
UGT1A7	UGT1A7	-2.39022	1.37401	0.129099
GREM2	GREM2	-2.39731	1.92928	0.0474418
ADAMTSL3	ADAMTSL3	-2.40294	17.7085	1.11294e-16
JAKMIP3	JAKMIP3	-2.41281	9.02919	2.15849e-08
TMEM59L	TMEM59L	-2.41517	3.05354	0.0055094
HUNK	HUNK	-2.41976	3.91244	0.000991789
LOC100128006	LOC100128006	-2.43093	23.2428	4.64365e-22
PTPRQ	PTPRQ	-2.43339	6.05445	1.20953e-05
ANXA8	ANXA8	-2.44483	7.59364	4.67522e-07
HSPB3	HSPB3	-2.46606	2.13819	0.0322421
ZNF354C	ZNF354C	-2.47409	1.80177	0.0600151
EVPLL	EVPLL	-2.47734	4.15343	0.000612069
PCA3	PCA3	-2.48348	18.7365	1.1365e-17
NFATC2	NFATC2	-2.48371	14.0235	3.89085e-13
PLXNA4	PLXNA4	-2.49977	1.48704	0.105902
SRPR	SRPR	-2.51086	81.7741	1.78441e-79
KRT16	KRT16	-2.52373	2.25329	0.0258808
NPY4R	NPY4R	-2.52786	5.58855	3.19805e-05
C2CD4D	C2CD4D	-2.54743	1.48013	0.107194
FOXS1	FOXS1	-2.55296	8.64515	4.94758e-08
ANXA8L1	ANXA8L1	-2.55314	13.1515	2.59056e-12
CDH7	CDH7	-2.56239	7.00187	1.64854e-06
HRCT1	HRCT1	-2.5683	14.1284	3.08359e-13
LOC100132111	LOC100132111	-2.58302	1.57665	0.0900014
KIF26A	KIF26A	-2.60064	26.7662	1.82768e-25
SLC27A6	SLC27A6	-2.60115	3.87201	0.00107694
FEZF1-AS1	FEZF1-AS1	-2.63756	3.10496	0.0049962
BARX1	BARX1	-2.64037	1.94024	0.0465561
TRIM29	TRIM29	-2.6614	15.4991	1.47643e-14
CDH11	CDH11	-2.69735	5.84069	1.87463e-05
MIR5190	MIR5190	-2.72199	2.60551	0.0132069
MIR1284	MIR1284	-2.7732	2.233	0.0269177
LOC101927934	LOC101927934	-2.77765	2.82322	0.00863935
MIR325HG	MIR325HG	-2.79985	2.36509	0.0209441
GPR133	GPR133	-2.80316	30.4367	4.64478e-29
DOCK2	DOCK2	-2.81159	23.1006	6.38547e-22
LINC00670	LINC00670	-2.81348	4.35608	0.000407302
ITGA11	ITGA11	-2.82469	85.1489	9.84451e-83
LINCR-0002	LINCR-0002	-2.84077	1.41778	0.119492
CPVL	CPVL	-2.84988	6.81256	2.48535e-06
MVB12B	MVB12B	-2.85624	1.35184	0.134017
HOXD-AS2	HOXD-AS2	-2.90459	2.37667	0.0205257
SCGB3A2	SCGB3A2	-2.91346	1.38517	0.126766
KRT19	KRT19	-2.92096	34.0635	1.35449e-32
LRRC15	LRRC15	-2.9607	15.8815	6.23324e-15
SLC9C1	SLC9C1	-2.96528	2.12463	0.0330616
SRRM4	SRRM4	-2.97641	3.82601	0.00117994
RBP1	RBP1	-3.02119	7.30613	8.60894e-07
MIR143HG	MIR143HG	-3.03652	18.9797	6.62836e-18
UNC5D	UNC5D	-3.0387	26.427	3.89905e-25
C4BPB	C4BPB	-3.0921	19.2466	3.70236e-18
CCDC185	CCDC185	-3.10147	1.6254	0.0824638
ITGA4	ITGA4	-3.13802	29.9909	1.23568e-28
LUZP2	LUZP2	-3.21323	19.0111	6.21073e-18
SLC46A3	SLC46A3	-3.24383	1.33601	0.138219
MED12L	MED12L	-3.27516	13.2519	2.0944e-12
LOC100144595	LOC100144595	-3.29072	1.38482	0.126781
NR4A3	NR4A3	-3.3133	47.9847	3.33528e-46
FLJ35934	FLJ35934	-3.32361	1.40039	0.123329
LRRN2	LRRN2	-3.38504	2.10854	0.0340849
DIRAS1	DIRAS1	-3.39364	6.16989	9.57058e-06
KLHL38	KLHL38	-3.39427	1.51771	0.100307
ZNF521	ZNF521	-3.39839	11.4757	1.04129e-10
A2MP1	A2MP1	-3.40945	1.51879	0.100131
LGSN	LGSN	-3.48062	11.5916	8.04512e-11
BRDT	BRDT	-3.48974	1.62078	0.08309
PPP2R2C	PPP2R2C	-3.50175	22.9676	8.51947e-22
IGSF10	IGSF10	-3.50663	98.9419	2.94464e-96
EDN2	EDN2	-3.52558	17.6825	1.17783e-16
PDX1	PDX1	-3.53528	22.6194	1.85867e-21
AQP1	AQP1	-3.54224	21.9852	7.83882e-21
HOXA13	HOXA13	-3.54562	5.40066	4.73382e-05
MIR5008	MIR5008	-3.56597	1.69993	0.0720854
ZNF423	ZNF423	-3.59007	46.9995	2.91166e-45
CACNA1C	CACNA1C	-3.59085	2.25053	0.0260122
DMBX1	DMBX1	-3.66707	1.30197	1
WDR93	WDR93	-3.69026	1.35767	1
AQP4	AQP4	-3.71723	1.38048	1
PZP	PZP	-3.72665	47.4394	1.13017e-45
TPTE	TPTE	-3.73921	1.39915	1
SCN3A	SCN3A	-3.76942	21.1148	5.55874e-20
LINC00052	LINC00052	-3.77448	1.90892	0.0492842
MIR381HG	MIR381HG	-3.88076	1.5593	0.0929009
MIR4526	MIR4526	-3.94972	1.56846	0.091371
LPPR5	LPPR5	-3.99357	1.68269	0.0746209
LOC100507351	LOC100507351	-4.0926	1.77777	0.0627431
MAGEA1	MAGEA1	-4.10337	35.1342	1.22576e-33
KCNQ1	KCNQ1	-4.10959	3.24203	0.00379246
DCLK3	DCLK3	-4.12482	1.73989	0.0670655
MAPK4	MAPK4	-4.13068	5.97256	1.43436e-05
LOC102546299	LOC102546299	-4.191	1.82767	0.0572659
WISP2	WISP2	-4.22906	24.9614	1.00532e-23
MIR143	MIR143	-4.25598	2.52855	0.0152798
CBLN2	CBLN2	-4.27301	2.01055	0.0409519
SERTM1	SERTM1	-4.28716	1.98214	0.0431587
STAC2	STAC2	-4.30009	42.4804	8.26441e-41
GSTM2	GSTM2	-4.34382	2.12917	0.0327902
DES	DES	-4.36131	2.0894	0.0353372
APBB1IP	APBB1IP	-4.36962	2.10349	0.0344166
AOC1	AOC1	-4.39753	2.69821	0.0110738
PDX1-AS1	PDX1-AS1	-4.40965	3.79143	0.00126497
KCP	KCP	-4.53128	2.33265	0.0222391
SNORD114-20	SNORD114-20	-4.58643	2.40101	0.0195787
LOC100507431	LOC100507431	-4.62741	3.13679	0.00467609
TMEM176B	TMEM176B	-4.80019	2.81851	0.00872421
MEG9	MEG9	-4.91514	2.98742	0.00627446
MIR6165	MIR6165	-4.97311	3.06968	0.00534971
CDX2	CDX2	-5.0138	3.01292	0.00597735
TMEM176A	TMEM176A	-5.05466	3.24472	0.00377183
LOC101927835	LOC101927835	-5.23394	3.55434	0.00201727
HEY2	HEY2	-5.24955	4.14379	0.000621602
SNHG24	SNHG24	-5.28598	4.22604	0.000526489
RTL1	RTL1	-5.37942	4.45261	0.000335037
PRKCB	PRKCB	-5.76339	9.9659	2.83056e-09
MEG8	MEG8	-5.79688	4.64362	0.000226808
TMPRSS15	TMPRSS15	-6.25184	6.19219	9.13453e-06
ALDH1A2	ALDH1A2	-6.77968	22.9781	8.35411e-22
MEG3	MEG3	-7.70592	18.8172	9.50442e-18
